# Supplementary material for: Activity-based protein profiling reveals deubiquitinase and aldehyde dehydrogenase targets of a cyanopyrrolidine probe
Source: RSC Med Chem. 2021 Aug 16;12(11):1935–43. doi: 10.1039/d1md00218j (PMC8597422; doi:10.1039/d1md00218j)
Supplement: MD-012-D1MD00218J-s002 [file MD-012-D1MD00218J-s002.xlsx]

## Sheet: Data S1
Supplementary Data S1. Protein lists of ABP MT16-205 target engagement
Time-course target identification and quantification of MT16-205 labelling in HEK293 cells using LFQ-chemical proteomics
LFQ proteomics analysis of ABP MT16-205 labelling (130 nM) in different incubation time (3, 6, 18 h) and 30 nM, 3h.
Filtering (all values table):
Removed: Potential contaminants, Reverse, Only identified by site
All reporter intensities logarithmized (values)
Values required in minimum 2 out of 3 samples (condition)
Values required in minimum 2 razor + unique peptides

## Sheet: Time
Gene names	Protein names	Protein IDs (Uniprot accession)	Majority protein IDs (Uniprot accession)	DUBs	ALDHs	Log2 intensity values												N: Peptides	N: Razor + unique peptides	N: Unique peptides	N: Sequence coverage [%]	N: Unique + razor sequence coverage [%]	N: Unique sequence coverage [%]	N: Mol. weight [kDa]	N: Q-value	N: Score	N: Intensity	N: MS/MS count
						DMSO (1)	DMSO (2)	DMSO (3)	MT16-205 130 nM, 3 h (1)	MT16-205 130 nM, 3 h (2)	MT16-205 130 nM, 3 h (3)	MT16-205 130 nM, 6 h (1)	MT16-205 130 nM, 6 h (2)	MT16-205 130 nM, 6 h (3)	MT16-205 130 nM, 18 h (1)	MT16-205 130 nM, 18 h (2)	MT16-205 130 nM, 18 h (3)
		P0DPI2;A0A0B4J2D5;P0DPI2-2;A0A0B4J2D5-2	P0DPI2;A0A0B4J2D5;P0DPI2-2;A0A0B4J2D5-2			0.0255356	0.0144825	-0.0400181	6.50561	6.78953	6.73144	6.98279	7.16347	6.92666	7.18184	7.52513	7.43685	10	10	10	40.7	40.7	40.7	28.17	0	205	37398000000	221
HNRNPC;HNRNPCL4;HNRNPCL1;HNRNPCL3;HNRNPCL2	Heterogeneous nuclear ribonucleoproteins C1/C2;Heterogeneous nuclear ribonucleoprotein C-like 4;Heterogeneous nuclear ribonucleoprotein C-like 1;Heterogeneous nuclear ribonucleoprotein C-like 3;Heterogeneous nuclear ribonucleoprotein C-like 2	P07910-4;P0DMR1;P07910-2;O60812;B7ZW38;B2RXH8;P07910;P07910-3	P07910-4;P0DMR1;P07910-2;O60812;B7ZW38;B2RXH8;P07910;P07910-3			-0.116198	-0.145609	0.261806	0.252386	-0.0514278	0.578897	0.281187	NaN	NaN	0.191973	0.373243	NaN	2	2	2	8.4	8.4	8.4	27.821	0	14.935	319110000	23
AGPS	Alkyldihydroxyacetonephosphate synthase, peroxisomal	O00116	O00116			-0.207922	NaN	0.207922	-0.219528	-0.349495	-0.127436	NaN	NaN	0.0973053	-0.1856	-0.498562	-0.166636	6	6	6	14	14	14	72.911	0	37.002	261430000	16
ACOT7	Cytosolic acyl coenzyme A thioester hydrolase	O00154-6;O00154-4;O00154-5;O00154-7;O00154;O00154-2;O00154-3	O00154-6;O00154-4;O00154-5;O00154-7;O00154;O00154-2;O00154-3			-0.123708	0.0936915	0.0300166	0.466126	0.505025	-0.0730909	1.00066	1.0503	0.876185	0.772254	1.31347	0.203261	6	6	6	20.4	20.4	20.4	36.567	0	43.818	1031500000	33
PSMD11	26S proteasome non-ATPase regulatory subunit 11	O00231;O00231-2	O00231;O00231-2			-0.0448214	0.117669	-0.072848	0.0579179	0.327569	0.269761	0.423864	0.364351	0.728921	0.0879396	0.432927	0.022857	9	9	9	23.2	23.2	23.2	47.463	0	74.493	1187000000	117
PSMD12	26S proteasome non-ATPase regulatory subunit 12	O00232;O00232-2	O00232;O00232-2			0.50997	0.0909564	-0.600927	0.706649	0.200848	0.366267	1.0156	0.441273	NaN	-1.00835	NaN	0.211875	8	8	8	17.5	17.5	17.5	52.904	0	56.525	443730000	34
PGRMC1	Membrane-associated progesterone receptor component 1	O00264;O00264-2	O00264;O00264-2			0.197806	-0.252221	0.0544154	0.063666	0.159665	-0.0531743	0.0249907	-0.347602	NaN	-0.0841535	0.796637	0.0430514	4	4	4	20	20	20	21.671	0	24.879	536420000	43
CLIC1	Chloride intracellular channel protein 1	O00299	O00299			-0.0853297	0.0253576	0.0599721	0.301759	0.477519	0.15373	0.292777	0.508012	0.410978	0.170095	0.391704	0.645702	7	7	7	33.2	33.2	33.2	26.922	0	75.292	2467100000	107
EIF3F	Eukaryotic translation initiation factor 3 subunit F	O00303	O00303	+		0.292493	-0.0565599	-0.235933	0.960145	1.03606	0.791966	0.715445	0.829402	1.09668	0.378955	0.512013	0.593505	8	8	8	28.3	28.3	28.3	37.563	0	65.003	622090000	40
IPO5	Importin-5	O00410;O00410-3;O00410-2;O60518	O00410;O00410-3;O00410-2			0.105232	0.0225735	-0.127806	-0.106943	-0.052372	-0.0805187	0.106291	1.08917	0.144424	0.193319	0.205784	-0.0591393	17	17	17	20.1	20.1	20.1	123.63	0	158.13	2468700000	112
DNM1L	Dynamin-1-like protein	O00429-4;O00429-5;O00429-3;O00429-2;O00429;O00429-8;O00429-6;O00429-7	O00429-4;O00429-5;O00429-3;O00429-2;O00429;O00429-8;O00429-6;O00429-7			-0.11894	0.0684992	0.0504405	NaN	0.274451	0.0659167	-0.0411504	0.273917	-0.00151571	0.286971	0.0691134	0.0361811	4	4	4	6.2	6.2	6.2	78.099	0	26.179	314830000	25
PSMD14	26S proteasome non-ATPase regulatory subunit 14	O00487	O00487	+		0.0724039	NaN	-0.0724039	0.538104	0.279176	0.437558	0.7487	NaN	NaN	0.321507	0.342605	0.29956	2	2	2	9.4	9.4	9.4	34.577	0	19.386	387780000	22
DDX3X;DDX3Y	ATP-dependent RNA helicase DDX3X;ATP-dependent RNA helicase DDX3Y	O00571-2;O00571;O15523-2;O15523;O15523-3;Q9NQI0-3;Q9NQI0-2;Q9NQI0-4;Q9NQI0	O00571-2;O00571;O15523-2;O15523			0.0475496	-0.185708	0.138158	-0.719453	-0.588889	-0.516432	-0.653372	-0.144177	-0.191674	-0.623011	NaN	-0.751527	12	12	12	19.2	19.2	19.2	71.354	0	90.717	1071800000	86
IRS4	Insulin receptor substrate 4	O14654	O14654			-0.0473817	-0.178869	0.22625	-0.116466	0.19427	0.462992	0.250695	-0.203819	0.307976	0.2529	0.155205	0.465058	14	14	14	12.8	12.8	12.8	133.77	0	101.29	884930000	68
PRMT5	Protein arginine N-methyltransferase 5;Protein arginine N-methyltransferase 5, N-terminally processed	O14744;O14744-5;O14744-2;O14744-3;O14744-4	O14744;O14744-5;O14744-2;O14744-3			-0.13743	0.173382	-0.0359529	0.306634	0.591296	0.570939	0.941676	1.17119	1.32085	1.24389	1.12847	0.472108	7	7	7	12.7	12.7	12.7	72.683	0	55.221	848230000	62
PSMA7	Proteasome subunit alpha type-7	O14818;O14818-2;O14818-4;Q8TAA3-2;Q8TAA3-5;Q8TAA3	O14818;O14818-2			-0.0337315	-0.0231781	0.0569096	0.396784	0.322021	0.566448	0.483654	-0.0758648	0.7952	0.344639	0.427473	0.607529	4	4	4	17.3	17.3	17.3	27.887	0	27.111	514420000	25
HAT1	Histone acetyltransferase type B catalytic subunit	O14929-2;O14929	O14929-2;O14929			0.0761388	0.106225	-0.182364	0.413795	0.432386	0.466207	NaN	0.350791	0.799018	0.518882	0.179197	NaN	2	2	2	9.3	9.3	9.3	39.786	0	45.01	396710000	20
UQCRQ	Cytochrome b-c1 complex subunit 8	O14949	O14949			0.0433865	-0.501637	0.45825	-0.482904	-1.02046	-0.654036	-1.4622	-0.390623	-0.314352	0.181961	-0.710474	-0.163668	8	8	8	58.5	58.5	58.5	9.9062	0	67.596	8541900000	122
MYL12A;MYL12B;MYL9	Myosin regulatory light chain 12A;Myosin regulatory light chain 12B;Myosin regulatory light polypeptide 9	P19105;O14950;P24844;P24844-2	P19105;O14950;P24844			0.200109	0.155615	-0.355724	-0.423864	0.145693	-0.407299	0.0935879	-0.263498	-0.475679	-2.33416	0.543947	-0.342617	7	7	7	50.9	50.9	50.9	19.794	0	109.05	1556300000	79
XPO1	Exportin-1	O14980	O14980			0.149926	-0.00923793	-0.140689	0.384523	0.372997	0.146921	0.497341	0.877506	0.611356	0.315955	1.02553	0.569894	22	22	22	23.3	23.3	23.3	123.38	0	165.13	3531400000	234
PFAS	Phosphoribosylformylglycinamidine synthase	O15067	O15067			-0.109596	0.129129	-0.0195332	0.405935	-0.0247765	0.108988	0.615324	0.896196	0.869829	0.118135	1.04619	0.152548	6	6	6	5	5	5	144.73	0	45.506	632740000	56
ARPC3	Actin-related protein 2/3 complex subunit 3	O15145	O15145			0.0578976	-0.0578976	NaN	0.838791	-0.0955162	-0.228708	0.213356	0.579533	NaN	0.22311	NaN	0.128492	2	2	2	12.4	12.4	12.4	20.546	0	14.253	108400000	15
GNPAT	Dihydroxyacetone phosphate acyltransferase	O15228-2;O15228	O15228-2;O15228			NaN	0	NaN	1.19725	0.643707	0.96542	1.4518	NaN	0.757849	1.82791	NaN	2.99537	3	3	3	4.8	4.8	4.8	69.906	0	18.967	179500000	24
PPM1G	Protein phosphatase 1G	O15355	O15355			-0.0469513	0.104723	-0.0577717	0.0584297	-0.0551872	-0.119257	-0.673883	-0.174032	-0.66538	-0.159422	-0.7637	-0.41984	8	8	8	19.4	19.4	19.4	59.271	0	54.342	429630000	48
EIF3D	Eukaryotic translation initiation factor 3 subunit D	O15371-2;O15371-3;O15371	O15371-2;O15371-3;O15371			0.151646	-0.0881577	-0.063488	0.435417	-0.0818596	-0.290054	0.285551	-0.68968	0.293602	-0.748037	0.551958	0.102707	6	6	6	10.8	10.8	10.8	58.14	0	41.866	690520000	58
EIF3H	Eukaryotic translation initiation factor 3 subunit H	O15372	O15372	+		0.199495	0.332994	-0.53249	0.152491	0.10318	0.0358295	0.458662	0.406778	0.386066	-0.423803	0.580231	0.020752	8	8	8	22.4	22.4	22.4	39.93	0	66.185	374370000	47
DHX15	Pre-mRNA-splicing factor ATP-dependent RNA helicase DHX15	O43143	O43143			-0.176512	0.218627	-0.0421149	-0.0582148	0.283948	0.591663	0.889592	0.662916	0.438932	1.05462	0.720767	0.311288	8	8	8	10.6	10.6	10.6	90.932	0	51.547	552930000	32
CYB5B	Cytochrome b5 type B	O43169	O43169			0	NaN	NaN	3.67105	3.82853	4.10889	4.31535	1.74625	4.0871	3.55587	4.12086	4.11696	4	4	4	50.7	50.7	50.7	16.332	0	107.91	4998700000	68
PHGDH	D-3-phosphoglycerate dehydrogenase	O43175	O43175			-0.0052077	0.0740579	-0.0688502	0.632613	0.564058	0.452424	0.48191	-0.0154158	0.422654	0.197685	0.451528	0.157607	12	12	12	25.7	25.7	25.7	56.65	0	106.14	4135200000	141
PSMD3	26S proteasome non-ATPase regulatory subunit 3	O43242;O43242-2	O43242;O43242-2			-0.127256	0.0363655	0.0908909	0.583736	0.346928	0.619875	-0.0160618	0.682753	-0.112495	-0.0218124	-0.216814	-0.0838642	11	11	11	23.4	23.4	23.4	60.977	0	95.076	897570000	72
TXNL1	Thioredoxin-like protein 1	O43396	O43396			0.311724	-0.675683	0.363959	0.202895	1.06549	0.610087	0.924855	-0.021663	NaN	-0.0857194	0.707137	0.345883	6	6	6	28	28	28	32.251	0	47.76	554510000	31
BUB3	Mitotic checkpoint protein BUB3	O43684-2;O43684	O43684-2;O43684			0.0703882	-0.194432	0.124044	0.194288	-0.0508181	-0.0290591	-0.140452	0.0634092	-0.264319	0.215455	-0.333434	0.0593065	9	9	9	31	31	31	36.954	0	73.321	997070000	86
ACTN4	Alpha-actinin-4	O43707;O43707-2;O43707-3;P35609-2;P35609;Q08043;Q9H254-2;Q9H254-4;Q9H254	O43707;O43707-2			-0.132952	-0.126206	0.259158	0.568593	0.336938	0.407356	0.45782	0.563186	0.716092	0.031318	-0.124936	-0.271327	29	29	22	41.4	41.4	33.3	104.85	0	249.47	3156500000	185
NARS	Asparagine--tRNA ligase, cytoplasmic	O43776;O43776-2	O43776			0.0982755	-0.156295	0.058019	-0.0413806	0.195724	-0.170451	0.708535	0.0135129	0.614101	0.143358	0.651155	-0.14849	9	9	9	16.6	16.6	16.6	62.942	0	80.168	921650000	55
LANCL1	LanC-like protein 1	O43813	O43813			NaN	-0.192627	0.192627	0.2609	-0.13167	0.530066	0.203899	NaN	-0.0734425	NaN	0.168533	0.493868	3	3	3	7	7	7	45.283	0	19.01	175880000	11
PRPSAP2	Phosphoribosyl pyrophosphate synthase-associated protein 2	O60256;O60256-3;O60256-4;O60256-2;Q14558;Q14558-2	O60256;O60256-3;O60256-4;O60256-2			NaN	0	NaN	0.602409	0.980844	0.597965	1.26875	0.859144	0.610519	NaN	NaN	0.378906	5	5	5	17.3	17.3	17.3	40.925	0	31.806	261760000	28
SYNCRIP	Heterogeneous nuclear ribonucleoprotein Q	O60506-4;O60506-3;O60506-2;O60506;O60506-5	O60506-4;O60506-3;O60506-2;O60506;O60506-5			0.0647456	-0.0197233	-0.0450223	-0.143339	0.229737	0.261584	0.372698	0.406897	0.381585	-0.00281843	0.0458094	0.201235	10	10	8	23.3	23.3	19.5	58.735	0	77.865	892090000	33
PRAF2	PRA1 family protein 2	O60831	O60831			NaN	NaN	0	2.32169	2.05861	1.95454	3.10235	2.04902	3.4245	3.1621	3.69314	3.00637	3	3	3	20.2	20.2	20.2	19.258	0	42.934	2165500000	53
EIF5B	Eukaryotic translation initiation factor 5B	O60841	O60841			0	NaN	NaN	0.0830326	-0.00933266	-0.0601273	0.198895	NaN	NaN	-0.057148	0.26235	0.151613	3	3	3	3.3	3.3	3.3	138.83	0	19.514	161260000	9
DNAJA2	DnaJ homolog subfamily A member 2	O60884	O60884			0.188641	-0.188641	NaN	-0.370226	-0.488976	-0.589668	-0.129971	NaN	-0.195242	NaN	NaN	-0.448839	4	4	4	9.7	9.7	9.7	45.745	0	24.848	156500000	14
WDR1	WD repeat-containing protein 1	O75083;O75083-3	O75083;O75083-3			-0.152315	0.034111	0.118204	-0.0004673	0.667646	0.389463	0.485109	0.108551	0.122496	0.350241	0.848322	0.463434	8	8	8	17.7	17.7	17.7	66.193	0	72.546	1357600000	49
CPNE3	Copine-3	O75131;Q86YQ8-2;Q9HCH3-2;Q96FN4-2;Q96FN4;Q8IYJ1;Q96A23;O95741;Q9UBL6-2;Q86YQ8;Q96A23-2;Q9HCH3;O95741-2;Q9UBL6	O75131			-0.0321115	0.0386511	-0.00653966	0.448245	0.599259	-0.0216878	1.27807	1.23441	0.836138	0.464009	1.05755	0.90848	5	5	5	8.8	8.8	8.8	60.13	0	32.35	460230000	40
TBCA	Tubulin-specific chaperone A	O75347;O75347-2	O75347;O75347-2			0.042642	0.181226	-0.223868	-1.16645	-0.166001	-1.03361	-0.785084	-0.82453	-1.01061	NaN	-0.179627	-0.291751	6	6	6	50.9	50.9	50.9	12.855	0	64.666	905860000	63
VPS4B	Vacuolar protein sorting-associated protein 4B	O75351;Q6PIW4-2;Q6PIW4	O75351			0.0449263	0.152617	-0.197543	-0.293241	0.858132	0.26406	0.448439	0.427691	0.662022	0.522345	0.993769	-0.0691045	7	7	6	20.7	20.7	18	49.301	0	42.233	453530000	24
MPDU1	Mannose-P-dolichol utilization defect 1 protein	O75352-2;O75352	O75352-2;O75352			-0.0875683	NaN	0.0875683	1.16581	0.325006	-0.155685	NaN	0.695339	1.77823	1.16948	0.650795	-0.00458908	2	2	2	12.9	12.9	12.9	19.752	0	12.158	78853000	21
FLNB	Filamin-B	O75369-2;O75369-9;O75369;O75369-8;O75369-6;O75369-3;O75369-5;O75369-4;O75369-7	O75369-2;O75369-9;O75369;O75369-8;O75369-6;O75369-3;O75369-5;O75369-4;O75369-7			0.110996	-0.207923	0.096927	-0.297917	-0.772736	NaN	-0.4518	NaN	0.0261796	0.177509	-0.171902	-0.695027	15	9	9	6.7	4.7	4.7	275.66	0	53.223	185510000	20
CS	Citrate synthase, mitochondrial	O75390	O75390			-0.0389194	-0.202421	0.241341	0.620001	0.285114	0.41511	0.363987	0.541161	0.561775	0.637259	0.841463	0.37171	8	8	8	17.4	17.4	17.4	51.712	0	54.611	1611900000	95
BANF1	Barrier-to-autointegration factor;Barrier-to-autointegration factor, N-terminally processed	O75531	O75531			-0.156046	0.156046	NaN	0.537306	0.359962	-0.101812	NaN	1.0046	0.246063	0.436539	0.652224	-0.199772	2	2	2	40.4	40.4	40.4	10.058	0	25.391	518870000	29
SF3B1	Splicing factor 3B subunit 1	O75533	O75533			0.0751336	-0.0882136	0.01308	-0.0321891	-0.175654	-0.193249	0.411064	0.60176	0.157468	0.126933	0.499328	0.0103696	11	11	11	10.7	10.7	10.7	145.83	0	74.154	414970000	45
CSDE1	Cold shock domain-containing protein E1	O75534-2;O75534;O75534-3;O75534-4	O75534-2;O75534;O75534-3;O75534-4			-0.0263901	-0.00244331	0.0288334	-0.209595	-0.333851	-0.360214	-0.573463	NaN	0.138552	-1.11813	-0.199137	-0.358389	8	8	8	12.4	12.4	12.4	85.746	0	55.623	515320000	54
SNRNP200	U5 small nuclear ribonucleoprotein 200 kDa helicase	O75643;O75643-2	O75643			-0.0777308	-0.113858	0.191589	-0.471566	-0.777049	-0.593194	-0.0472838	-0.79048	0.029302	-0.386014	0.272897	-0.125487	14	14	14	7	7	7	244.5	0	96.662	659400000	61
NUP155	Nuclear pore complex protein Nup155	O75694-2;O75694	O75694-2;O75694			0	NaN	NaN	0.632357	0.554426	0.631067	NaN	0.294266	0.549128	0.32773	0.681183	0.321255	5	5	5	3.8	3.8	3.8	149.01	0	31.415	157110000	18
EIF3G	Eukaryotic translation initiation factor 3 subunit G	O75821	O75821			0.0319087	0.113249	-0.145158	0.276202	0.344695	-0.0079244	0.532498	0.200694	-0.467271	-0.471065	0.333018	-0.0606912	6	6	6	24.7	24.7	24.7	35.611	0	54.916	649470000	45
IDH1	Isocitrate dehydrogenase [NADP] cytoplasmic	O75874	O75874			0.126173	-0.000579834	-0.125593	0.575472	0.349234	0.716677	0.034193	NaN	-0.078043	NaN	0.86717	0.580019	7	7	6	18.8	18.8	16.7	46.659	0	57.194	505090000	49
ATP5H	ATP synthase subunit d, mitochondrial	O75947;O75947-2	O75947;O75947-2			0.00767072	0.0424913	-0.050162	-1.39713	-0.33801	-0.468089	NaN	-0.371051	NaN	-0.0198523	NaN	-0.217114	4	4	4	30.4	30.4	30.4	18.491	0	25.647	365240000	23
FLOT1	Flotillin-1	O75955-2;O75955	O75955-2;O75955			0.248182	-0.0605323	-0.187649	-0.167853	0.303455	-0.156859	-0.159629	0.0262121	-0.518571	-0.421525	NaN	-0.426787	3	3	3	8.4	8.4	8.4	42.08	0	20.822	99512000	17
GLRX3	Glutaredoxin-3	O76003	O76003			-0.186185	0.143581	0.0426038	0.420034	0.555826	0.779004	0.981494	0.641284	0.449556	0.457309	1.14301	0.0659173	6	6	6	16.7	16.7	16.7	37.432	0	54.172	896310000	73
SRP72	Signal recognition particle subunit SRP72	O76094;O76094-2	O76094;O76094-2			0.103902	0.113521	-0.217423	-0.568953	-0.673972	-0.242287	-0.946454	-0.775458	-0.682326	-0.21229	NaN	-0.0987307	5	5	5	7.3	7.3	7.3	74.605	0	33.196	198280000	14
MTA2	Metastasis-associated protein MTA2	O94776;O94776-2;Q13330-2;Q9BTC8-2;Q9BTC8;Q13330-3;Q13330	O94776;O94776-2			-0.0450172	0.146488	-0.101471	-0.311497	-0.406433	-0.585875	0.0943108	0.237535	NaN	NaN	-0.50197	-0.360004	3	3	3	5.4	5.4	5.4	75.022	0	18.789	150170000	21
LUC7L3	Luc7-like protein 3	O95232	O95232			0.17138	-0.373258	0.201878	-0.496625	-0.360017	-0.0353597	-0.741515	-1.51552	-1.47308	-0.380128	-0.800752	-0.55976	5	5	5	13.7	13.7	13.7	51.466	0	46.478	468800000	50
PGLS	6-phosphogluconolactonase	O95336	O95336			NaN	-0.153842	0.153842	0.538783	0.774222	0.539796	NaN	0.273499	0.331994	NaN	-0.74734	-0.0698404	5	5	5	27.9	27.9	27.9	27.547	0	34.459	563470000	11
IPO7	Importin-7	O95373	O95373			-0.065136	0.375534	-0.310398	0.564804	0.43092	0.424774	0.387386	1.15886	0.942188	0.636517	0.17675	0.460651	8	8	8	9.7	9.7	9.7	119.52	0	65.808	990860000	66
PGM3	Phosphoacetylglucosamine mutase	O95394;O95394-3;O95394-4	O95394;O95394-3;O95394-4			-0.0534821	0.0984917	-0.0450096	0.176365	-0.251307	0.115969	-0.270016	-0.497946	NaN	0.477087	NaN	-0.264938	5	5	5	8.7	8.7	8.7	59.851	0	28.762	266120000	31
AHSA1	Activator of 90 kDa heat shock protein ATPase homolog 1	O95433-2;O95433	O95433-2;O95433			0.272607	-0.230649	-0.0419585	0.0320142	-0.161774	-0.511315	0.186702	-0.380606	-0.0294768	-0.152651	-0.596492	-0.111989	6	6	6	27.8	27.8	27.8	32.339	0	52.128	436340000	37
MPC2	Mitochondrial pyruvate carrier 2	O95563	O95563			0.365808	NaN	-0.365808	-0.216393	-0.441574	-0.159554	NaN	0.913963	0.294754	0.520271	0.44677	-0.15432	2	2	2	17.3	17.3	17.3	14.279	0	16.409	190880000	19
ACSL3	Long-chain-fatty-acid--CoA ligase 3	O95573;O60488-2;O60488	O95573			-0.0386238	-0.050457	0.0890808	-0.0477829	0.192038	-0.100588	0.111637	NaN	NaN	0.102259	0.198442	0.222502	5	5	5	9.3	9.3	9.3	80.419	0	32.152	207310000	12
AIFM1	Apoptosis-inducing factor 1, mitochondrial	O95831-3;O95831;O95831-2;O95831-6;O95831-4;O95831-5	O95831-3;O95831;O95831-2			0.178347	-0.308138	0.129791	-0.000398636	0.301758	-0.202801	-0.466381	0.501713	-0.716171	0.169939	0.0295086	0.350367	7	7	7	15.3	15.3	15.3	66.294	0	59.802	425980000	70
TOMM40	Mitochondrial import receptor subunit TOM40 homolog	O96008;O96008-2	O96008;O96008-2			-0.0599944	0.261012	-0.201018	1.31531	1.29025	1.17352	1.66565	1.99092	2.00728	1.30969	1.56798	1.33221	6	6	6	26	26	26	37.893	0	108.97	2466300000	91
ACTL6A	Actin-like protein 6A	O96019-2;O96019	O96019-2;O96019			-0.50318	-0.387329	0.890509	-0.175842	-0.460333	-0.439308	-1.0171	-1.01981	-0.848646	0.923239	-0.084795	-0.0502167	3	3	3	12.9	12.9	12.9	43.236	0	27.147	317120000	20
LDHA	L-lactate dehydrogenase A chain	P00338;P00338-3;P00338-5;P00338-4;P00338-2;Q6ZMR3;P07864	P00338;P00338-3;P00338-5;P00338-4;P00338-2			0.0499624	-0.0672213	0.017259	0.509956	0.642686	0.62033	1.12766	0.409231	1.21044	0.360513	0.629531	0.47639	13	12	12	40.1	36.4	36.4	36.688	0	195.51	16267000000	205
GLUD1;GLUD2	Glutamate dehydrogenase 1, mitochondrial;Glutamate dehydrogenase 2, mitochondrial	P00367;P00367-3;P00367-2;P49448	P00367;P00367-3;P00367-2;P49448			0.126789	-0.10652	-0.0202694	-0.148546	0.0120659	0.327242	0.0429363	0.151455	0.118435	0.0679703	0.355471	0.275885	9	9	9	17.9	17.9	17.9	61.397	0	68.781	1009700000	49
CYB5R3	NADH-cytochrome b5 reductase 3;NADH-cytochrome b5 reductase 3 membrane-bound form;NADH-cytochrome b5 reductase 3 soluble form	P00387-2;P00387;P00387-3	P00387-2;P00387;P00387-3			0	NaN	NaN	0.0487347	0.123646	0.385597	0.154669	0.618387	0.89613	0.846222	0.341801	0.345882	6	6	6	27	27	27	31.628	0	41.192	584380000	18
GSR	Glutathione reductase, mitochondrial	P00390-5;P00390-4;P00390-2;P00390-3;P00390	P00390-5;P00390-4;P00390-2;P00390-3;P00390			0.141807	-0.143767	0.00196012	0.631133	-0.0745875	0.449418	0.930213	0.582633	0.935104	0.728549	1.06261	0.800868	5	5	5	15	15	15	47.267	0	35.896	523830000	26
MT-CO2	Cytochrome c oxidase subunit 2	P00403	P00403			-0.0148697	-0.413441	0.42831	0.197351	0.514414	-0.0239429	0.552181	0.302862	0.748854	-0.0712261	0.248575	0.344309	4	4	4	19.4	19.4	19.4	25.565	0	28.577	1016900000	46
PNP	Purine nucleoside phosphorylase	P00491	P00491			-0.147987	0.174051	-0.0260639	0.654133	0.922831	1.01918	0.868618	1.54964	1.54637	0.877918	1.35485	0.678637	11	11	11	49.5	49.5	49.5	32.118	0	107.25	1145800000	97
HPRT1	Hypoxanthine-guanine phosphoribosyltransferase	P00492;Q9NRG1-2;Q9NRG1	P00492			-0.0735098	-0.235434	0.308944	0.69416	0.948932	0.878534	0.70259	1.2059	1.64014	1.28731	1.45674	0.534707	6	6	6	29.8	29.8	29.8	24.579	0	54.3	1069000000	75
GOT2	Aspartate aminotransferase, mitochondrial	P00505;P00505-2	P00505;P00505-2			0.105498	0.0771472	-0.182645	-0.0294641	0.350011	0.148467	0.157803	-0.213285	-0.109569	-0.109323	0.110627	0.310109	14	14	14	32.3	32.3	32.3	47.517	0	167.12	3047500000	157
PGK1	Phosphoglycerate kinase 1	P00558;P00558-2;P07205	P00558;P00558-2			-0.0858568	0.123627	-0.0377706	0.340884	0.509925	0.268479	0.491288	0.990815	1.05364	0.478264	0.814011	0.485881	18	18	18	49.6	49.6	49.6	44.614	0	204.5	9425400000	240
TFRC	Transferrin receptor protein 1;Transferrin receptor protein 1, serum form	P02786	P02786			0.171696	-0.0367565	-0.134939	1.03459	1.09232	0.735291	1.2397	1.08107	1.65736	0.542955	1.00726	0.474962	10	10	10	15.1	15.1	15.1	84.87	0	74.778	593860000	64
ALDOA	Fructose-bisphosphate aldolase A	P04075;P04075-2;P05062	P04075;P04075-2			-0.199511	-0.00875537	0.208267	-0.18137	-0.283074	-0.210267	0.0598119	-0.11621	0.195045	0.0903791	-0.0582186	-0.0563361	19	19	17	69.5	69.5	59.9	39.42	0	323.31	21503000000	377
ANXA1	Annexin A1	P04083	P04083			0.447022	0.190123	-0.637145	-1.0791	-0.320678	-0.814826	-0.393943	-0.83378	-1.00532	-0.960185	-0.52502	-0.790242	14	14	14	47.7	47.7	47.7	38.714	0	294.39	7184700000	211
OAT	Ornithine aminotransferase, mitochondrial;Ornithine aminotransferase, hepatic form;Ornithine aminotransferase, renal form	P04181;P04181-2	P04181;P04181-2			-0.0193164	0.1459	-0.126584	0.823982	0.523973	0.32492	0.774652	1.04901	1.25326	1.00542	0.761413	0.477643	9	9	9	28	28	28	48.534	0	73.25	1175100000	87
GAPDH	Glyceraldehyde-3-phosphate dehydrogenase	P04406;P04406-2;O14556	P04406;P04406-2			0.0531228	0.132163	-0.185286	0.25279	0.446668	0.449928	0.590326	1.09064	0.579826	0.60782	0.781078	0.39504	15	15	15	51	51	51	36.053	0	319.89	29144000000	357
CAPNS1	Calpain small subunit 1	P04632;Q96L46	P04632			-0.15045	0.0145245	0.135925	-0.601711	-0.00693321	-0.724264	0.145977	-0.763859	-0.875435	-0.797232	-0.907606	-0.505148	5	5	5	25.4	25.4	25.4	28.315	0	60.403	884790000	57
TYMS	Thymidylate synthase	P04818;P04818-2;P04818-3	P04818;P04818-2;P04818-3			-0.0455214	-0.173474	0.218995	0.950879	1.27656	0.831334	1.18085	0.81804	1.29059	NaN	0.0674985	0.066707	6	6	6	25.2	25.2	25.2	35.716	0	44.27	764260000	45
RPN1	Dolichyl-diphosphooligosaccharide--protein glycosyltransferase subunit 1	P04843	P04843			-0.111737	0.0430921	0.0686448	0.106489	0.0108579	0.41599	0.322646	0.0377897	0.242441	0.232898	0.355234	0.17566	14	14	14	25.2	25.2	25.2	68.569	0	136.2	1007500000	66
ATP1A1	Sodium/potassium-transporting ATPase subunit alpha-1	P05023-4;P05023;P05023-3;P05023-2;P13637;P50993;P13637-2;P13637-3;Q13733;P20648;P54707;P54707-2	P05023-4;P05023;P05023-3;P05023-2			-0.0347462	0.0123444	0.0224018	0.394226	0.440559	-0.0338612	0.451252	0.491776	0.641813	0.281765	0.259365	0.143684	18	18	18	18.7	18.7	18.7	113	0	214.22	2229500000	133
ALDH2	Aldehyde dehydrogenase, mitochondrial	P05091;P05091-2;P00352	P05091;P05091-2		x	0.450424	0.472286	-0.92271	7.47795	7.32776	7.3093	7.38693	7.89636	7.37669	4.71698	5.12135	5.02122	26	26	23	55.1	55.1	52	56.381	0	323.31	17506000000	347
SLC25A5	ADP/ATP translocase 2;ADP/ATP translocase 2, N-terminally processed	P05141;Q9H0C2	P05141			-0.0366147	0.119765	-0.0831502	0.520365	0.696759	0.648801	0.739497	0.569497	0.467347	0.448533	0.320223	0.330371	12	12	4	35.2	35.2	14.4	32.852	0	91.33	8945800000	201
PCCA	Propionyl-CoA carboxylase alpha chain, mitochondrial	P05165-2;P05165;P05165-3	P05165-2;P05165;P05165-3			0.129814	-0.315063	0.185249	-0.438551	-1.24426	-0.920872	-0.913647	-0.289017	-0.384474	0.563194	-0.187292	-0.312948	32	32	32	50	50	50	77.047	0	323.31	19778000000	561
EIF2S1	Eukaryotic translation initiation factor 2 subunit 1	P05198	P05198			0.0430806	0.0184453	-0.061526	-0.46839	-0.18435	-0.0133464	0.0045255	0.164256	-0.20592	-0.488558	-0.55939	-0.310029	11	11	11	36.5	36.5	36.5	36.112	0	92.24	839460000	69
RPLP0;RPLP0P6	60S acidic ribosomal protein P0;60S acidic ribosomal protein P0-like	P05388;P05388-2;Q8NHW5	P05388;P05388-2;Q8NHW5			0.0248483	0.0960763	-0.120925	0.380252	0.757198	0.61996	0.572746	1.1321	1.39184	0.559579	0.587196	0.186696	10	10	10	43.8	43.8	43.8	34.273	0	101.46	3816800000	165
SSB	Lupus La protein	P05455	P05455			0.237179	-0.221447	-0.0157318	-0.695087	-0.220335	-0.306988	-1.13267	-1.0857	-1.09281	-0.521046	-1.41354	-0.153278	7	7	7	19.6	19.6	19.6	46.836	0	62.101	701240000	86
MYL1;MYL3	Myosin light chain 1/3, skeletal muscle isoform;Myosin light chain 3	P05976-2;P05976;P08590	P05976-2;P05976;P08590			0.316903	0.110249	-0.427152	0.498393	-0.0519021	0.635461	-0.216577	NaN	NaN	NaN	NaN	0.588515	2	2	2	10.7	10.7	10.7	16.684	0	14.507	231740000	21
CDK1	Cyclin-dependent kinase 1	P06493;P06493-2;P24941-2;P24941;Q00526;P11802-2;P11802;Q00534;Q96Q40-6;Q96Q40-4;Q96Q40-3;O94921-3;Q96Q40-5;Q96Q40;O94921-2;O94921;Q07002;Q07002-3	P06493;P06493-2			-0.0882651	-0.219386	0.307651	0.897098	0.287145	0.773723	0.679796	0.999286	0.399474	NaN	0.120382	0.48377	5	4	4	18.5	15.8	15.8	34.095	0	31.85	363680000	21
ATP5B	ATP synthase subunit beta, mitochondrial	P06576	P06576			-0.0893033	0.202159	-0.112855	-0.435598	0.476384	-0.338355	0.132243	NaN	NaN	NaN	-0.087623	-0.259538	11	11	11	27	27	27	56.559	0	72.517	468810000	30
ENO1	Alpha-enolase	P06733;P06733-2;P13929-3;P09104-2;P13929-2;P13929;P09104	P06733;P06733-2			-0.0850646	0.0650075	0.020057	0.0262369	0.278138	0.274907	0.473255	0.562829	0.842849	0.206706	0.458473	0.153577	20	20	20	59.7	59.7	59.7	47.168	0	323.31	25705000000	430
GPI	Glucose-6-phosphate isomerase	P06744;P06744-2;CON__Q3ZBD7;Q8N196	P06744;P06744-2			0.11057	0.00207392	-0.112644	0.124785	0.331147	-0.144759	0.33146	-0.140422	0.422902	0.184449	0.340022	0.399331	16	16	16	35.8	35.8	35.8	63.146	0	288.93	9504800000	267
NPM1	Nucleophosmin	P06748-2;P06748;P06748-3	P06748-2;P06748;P06748-3			0.113834	-0.223338	0.109504	-0.46637	-0.394688	-0.0144011	0.152015	-0.0286624	-0.627234	-0.129248	-0.469653	0.431493	6	6	6	21.5	21.5	21.5	29.464	0	52	2395900000	68
TPM3	Tropomyosin alpha-3 chain	P06753-2;P06753-3;P06753-6;P06753-5;P06753-4;P06753-7	P06753-2;P06753-3;P06753-6;P06753-5;P06753-4			-0.21537	0.356953	-0.141584	0.209857	0.177136	0.431693	0.276709	0.324355	0.545726	0.00958125	0.487221	-0.0749353	12	12	7	40.7	40.7	22.2	29.032	0	122.28	1662000000	93
LDHB	L-lactate dehydrogenase B chain	P07195	P07195			-0.0734151	0.03777	0.0356452	0.71947	0.958615	0.762147	0.928603	0.690455	0.483481	0.587271	0.0924651	0.701604	17	17	16	42.8	42.8	39.2	36.638	0	297.68	32775000000	320
P4HB	Protein disulfide-isomerase	P07237	P07237			-0.0664539	0.059597	0.00685692	0.446428	0.792675	0.292067	0.656418	0.552113	0.297747	0.602524	0.628265	0.676285	22	22	22	41.9	41.9	41.9	57.116	0	195.35	6673200000	274
ANXA2;ANXA2P2	Annexin A2;Putative annexin A2-like protein	P07355;P07355-2;A6NMY6	P07355;P07355-2;A6NMY6			0.179564	-0.0103067	-0.169257	-0.23537	0.0119368	-0.307905	-0.648568	-0.183362	-0.593372	-1.2059	-0.590036	-0.854205	13	13	13	45.1	45.1	45.1	38.604	0	185.57	3107100000	181
CAPN1	Calpain-1 catalytic subunit	P07384	P07384			0.0774174	-0.248215	0.170797	0.167639	0.2899	0.391464	0.313208	0.604002	0.403072	0.559845	0.368202	0.0814075	5	5	5	6.4	6.4	6.4	81.889	0	29.142	283090000	26
TUBB	Tubulin beta chain	P07437;A6NNZ2;CON__ENSEMBL:ENSBTAP00000025008;Q9H4B7	P07437			-0.103871	0.138288	-0.0344168	0.743711	0.792774	0.437011	0.889898	1.08414	1.06031	0.738897	0.614738	0.0587438	20	5	4	61.5	19.4	16	49.67	0	150.61	13871000000	213
PFN1	Profilin-1	P07737;CON__P02584	P07737			-0.164163	0.233628	-0.069465	0.4416	0.71011	0.403771	0.539412	1.02319	1.14688	0.709775	0.95896	0.506612	9	9	9	81.4	81.4	81.4	15.054	0	124.02	9592800000	166
APRT	Adenine phosphoribosyltransferase	P07741-2;P07741	P07741-2;P07741			0.208637	-0.154303	-0.0543346	0.634375	0.591356	0.609621	0.680836	1.08436	0.882578	0.804296	1.00727	0.0285873	5	5	5	41	41	41	14.557	0	52.28	980190000	47
EPRS	Bifunctional glutamate/proline--tRNA ligase;Glutamate--tRNA ligase;Proline--tRNA ligase	P07814	P07814			-0.278606	0.145783	0.132823	-0.258455	-0.696258	-0.860067	-0.947929	-0.964031	-1.21028	-0.35946	0.194239	-0.200485	13	13	13	11.1	11.1	11.1	170.59	0	99.73	913980000	68
HSP90AA1	Heat shock protein HSP 90-alpha	P07900;P07900-2;Q14568;Q58FG0;Q58FG1	P07900;P07900-2			0.078874	-0.0265338	-0.0523402	0.129203	0.307742	0.169416	0.146108	0.343307	-0.0736853	0.104753	-0.0153815	0.0688127	37	22	22	45.9	28.8	28.8	84.659	0	323.31	16170000000	448
ANXA6	Annexin A6	P08133-2;P08133	P08133-2;P08133			0.190254	-0.062706	-0.127548	0.0110512	0.0815201	0.118999	0.219559	0.390305	-0.273434	0.170067	0.533188	0.0868874	16	16	16	27.9	27.9	27.9	72.423	0	107.62	254920000000	103
HSP90AB1	Heat shock protein HSP 90-beta	P08238;Q58FF7	P08238			0.0145741	0.0345631	-0.0491371	0.0856857	0.316685	0.323839	0.336891	0.440855	0.623751	0.207157	0.292994	0.211679	41	41	20	51.7	51.7	27.8	83.263	0	323.31	66552000000	803
ASNS	Asparagine synthetase [glutamine-hydrolyzing]	P08243-2;P08243;P08243-3	P08243-2;P08243;P08243-3			0.0173422	0.00709216	-0.0244344	-0.386512	-0.157918	-0.150548	-0.0289605	-0.471088	-0.284219	0.176177	0.381083	0.141083	9	9	9	19.4	19.4	19.4	62.168	0	59.396	554310000	57
SNRNP70	U1 small nuclear ribonucleoprotein 70 kDa	P08621;P08621-2;P08621-3;P08621-4	P08621;P08621-2;P08621-3			0.12455	0.219382	-0.343932	-0.969878	-0.680599	-1.36417	-0.805143	-1.67165	-1.61111	-1.63391	-1.29793	-1.05157	15	15	15	38.2	38.2	38.2	51.556	0	139.83	3727500000	198
VIM	Vimentin	P08670	P08670			0.0578105	0.35731	-0.41512	-1.19984	-0.424806	0.115386	-0.908521	-0.845701	NaN	0.196181	-0.0168908	0.0867736	10	8	8	22.3	19.1	19.1	53.651	0	55.961	449810000	42
RPS17	40S ribosomal protein S17	P08708	P08708			-0.12443	-0.309683	0.434114	0.137374	0.219766	-0.0232073	-0.133015	1.068	0.663734	0.916595	-0.29658	-0.296696	4	4	4	47.4	47.4	47.4	15.55	0	48.936	1751300000	49
ANXA5	Annexin A5	P08758	P08758			0.41047	0.00269826	-0.413169	-0.829295	-0.330977	-0.742577	-0.314219	-0.819386	-0.548802	-0.604058	-0.0507857	-0.355986	17	17	17	66.2	66.2	66.2	35.936	0	323.31	11222000000	203
RPSA	40S ribosomal protein SA	P08865	P08865			0.186434	-0.0319138	-0.15452	0.688005	0.529251	0.553667	0.747612	1.01357	1.11111	0.289949	0.656796	0.363722	6	6	6	20	20	20	32.854	0	92.639	1662500000	78
GSTP1	Glutathione S-transferase P	P09211	P09211			0.0221901	0.121565	-0.143755	0.452909	0.549795	0.690243	0.940281	0.707876	0.971478	0.999231	1.03502	0.49564	7	7	7	50	50	50	23.356	0	79.976	2694400000	102
HMGB1	High mobility group protein B1	P09429;B2RPK0	P09429			-0.158162	0.118447	0.0397155	-0.794198	-0.414625	-0.503352	-0.497995	-2.09246	-0.840284	-0.168468	-0.52346	-0.183503	6	6	6	22.3	22.3	22.3	24.893	0	56.158	1069200000	86
CLTA	Clathrin light chain A	P09496-2;P09496-4;P09496-3;P09496;P09496-5	P09496-2;P09496-4;P09496-3;P09496			0.453433	-0.0697943	-0.383639	-0.90825	-0.47857	0.14495	0.52671	NaN	NaN	0.193439	0.552985	-0.0196253	5	5	5	25.2	25.2	25.2	23.662	0	34.488	938560000	36
DLD	Dihydrolipoyl dehydrogenase, mitochondrial	P09622;P09622-2;P09622-3	P09622;P09622-2;P09622-3			0.224635	-0.240037	0.0154025	0.0930869	0.379759	0.139407	-0.231971	0.033673	-1.14268	-0.0253251	-0.0826658	0.311169	9	9	9	20.6	20.6	20.6	54.177	0	71.61	705190000	84
HNRNPA1;HNRNPA1L2	Heterogeneous nuclear ribonucleoprotein A1;Heterogeneous nuclear ribonucleoprotein A1, N-terminally processed;Heterogeneous nuclear ribonucleoprotein A1-like 2	P09651-3;P09651-2;P09651;Q32P51	P09651-3;P09651-2;P09651;Q32P51			-0.0827141	0.0164528	0.0662613	-0.624968	-0.123644	-0.0747204	-0.454241	-0.41374	-0.273817	-0.0223999	-0.608055	-0.160572	9	9	9	40.1	40.1	40.1	29.386	0	72.535	1790700000	118
PARP1	Poly [ADP-ribose] polymerase 1	P09874	P09874			-0.271124	-0.193499	0.464622	0.0819702	-0.329256	-0.116274	0.0785065	0.213596	0.0764732	0.419369	0.601751	0.248234	30	30	30	33.3	33.3	33.3	113.08	0	252.01	6435200000	316
UCHL1	Ubiquitin carboxyl-terminal hydrolase isozyme L1	P09936	P09936	+		0.0379155	-0.213648	0.175733	6.05371	6.34795	6.53098	6.71268	6.80197	6.40885	5.88895	6.51567	6.17568	19	19	19	90.6	90.6	90.6	24.824	0	323.31	218380000000	662
LTA4H	Leukotriene A-4 hydrolase	P09960;P09960-4;P09960-2;P09960-3	P09960;P09960-4;P09960-2;P09960-3			-0.0561701	-0.0408885	0.0970586	0.622455	0.481569	0.292404	0.718704	0.784322	1.12695	0.564933	0.828779	0.381275	13	13	13	25.4	25.4	25.4	69.284	0	103.57	1548400000	124
UBA52;RPS27A;UBB;UBC	Ubiquitin-60S ribosomal protein L40;Ubiquitin;60S ribosomal protein L40;Ubiquitin-40S ribosomal protein S27a;Ubiquitin;40S ribosomal protein S27a;Polyubiquitin-B;Ubiquitin;Polyubiquitin-C;Ubiquitin	P62987;P62979;P0CG47;P0CG48	P62987;P62979;P0CG47;P0CG48			0.107477	-0.166174	0.0586967	0.730345	0.613104	0.660704	1.00453	0.578218	1.07569	0.348606	1.09885	0.387083	4	4	4	36.7	36.7	36.7	14.728	0	56.927	3713300000	90
HSPA1B;HSPA1A	Heat shock 70 kDa protein 1B;Heat shock 70 kDa protein 1A	P0DMV9;P0DMV8;P0DMV8-2	P0DMV9;P0DMV8;P0DMV8-2			0.138494	0.0101509	-0.148645	0.22229	0.2789	0.105623	0.19532	0.456734	0.374134	0.0573883	0.335129	0.176781	28	28	15	52.9	52.9	26.4	70.051	0	323.31	76864000000	636
U2AF1	Splicing factor U2AF 35 kDa subunit	P0DN76;Q01081;Q01081-2;Q01081-4;Q01081-3;Q8WU68-3;Q8WU68-2;Q8WU68	P0DN76;Q01081;Q01081-2;Q01081-4			-0.148153	0.0134646	0.134688	0.266549	-0.272176	-0.672895	-0.883775	NaN	NaN	-0.639657	NaN	-0.412286	4	4	4	21.2	21.2	21.2	27.872	0	55.553	655240000	41
HLA-B;HLA-C	HLA class I histocompatibility antigen, B-73 alpha chain;HLA class I histocompatibility antigen, Cw-7 alpha chain;HLA class I histocompatibility antigen, Cw-17 alpha chain;HLA class I histocompatibility antigen, Cw-1 alpha chain	Q31612;P10321;Q95604;P30499;Q31610;P30486	Q31612;P10321;Q95604;P30499			0.343632	-0.0932045	-0.250427	0.832296	0.838717	0.752394	1.49249	0.810806	0.874397	-0.971338	NaN	-0.1752	4	4	0	16.5	16.5	0	40.435	0	69.06	732910000	44
HIST1H1C;HIST1H1E;HIST1H1D	Histone H1.2;Histone H1.4;Histone H1.3	P16403;P10412;P16402;P22492;Q02539	P16403;P10412;P16402			0.127425	0.214039	-0.341464	-0.727371	-0.449241	-0.0470117	-0.601388	NaN	-1.7556	-0.603454	-0.196237	-0.43012	5	5	5	16	16	16	21.364	0	34.551	757240000	41
TXN	Thioredoxin	P10599;P10599-2	P10599;P10599-2			-0.179887	0.0649999	0.114887	0.119455	-0.347647	-0.186349	-0.0608527	0.125827	0.81915	-0.518853	0.433128	-0.835658	5	5	5	42.9	42.9	42.9	11.737	0	39.886	1340800000	56
COX5B	Cytochrome c oxidase subunit 5B, mitochondrial	P10606	P10606			-0.128076	0.243506	-0.11543	0.766429	0.541735	0.439528	0.523925	0.367245	0.717255	0.683449	0.536225	0.54181	4	4	4	24.8	24.8	24.8	13.696	0	28.106	422250000	30
ESD	S-formylglutathione hydrolase	P10768	P10768			-0.0207202	0.157655	-0.136935	0.186607	0.456682	0.293216	NaN	NaN	0.237815	-0.355384	NaN	0.392337	2	2	2	12.1	12.1	12.1	31.462	0	18.224	276020000	29
HSPD1	60 kDa heat shock protein, mitochondrial	P10809;P10809-2	P10809			0.0106201	0.0939445	-0.104565	-0.00891113	0.205992	0.300686	0.064085	-0.0132732	0.247496	-0.0965462	-0.0232334	0.184195	28	28	28	62.7	62.7	62.7	61.054	0	323.31	12945000000	335
HSPA5	78 kDa glucose-regulated protein	P11021	P11021			0.00598971	0.0547435	-0.0607332	-0.199529	0.140092	-0.0725206	0.270266	0.10476	0.281167	0.186904	0.415673	0.0362422	23	22	22	41.9	41.9	41.9	72.332	0	290.69	11278000000	395
HSPA8	Heat shock cognate 71 kDa protein	P11142;P11142-2;P54652	P11142;P11142-2			-0.143153	0.131692	0.0114606	-0.118893	0.098924	0.275808	0.230888	0.609292	0.571737	0.191129	0.290393	-0.0782477	27	25	22	44.1	41	38.5	70.897	0	323.31	28454000000	517
PYGB	Glycogen phosphorylase, brain form	P11216;P11217;P11217-2	P11216			0.0979258	-0.110328	0.0124022	0.00606219	-0.111272	0.0931822	0.317668	0.0947386	0.845322	0.3294	0.732987	0.289775	7	7	5	8.9	8.9	6.5	96.695	0	45.79	478730000	26
G6PD	Glucose-6-phosphate 1-dehydrogenase	P11413;P11413-2;P11413-3	P11413;P11413-2;P11413-3			0.17296	0.00474676	-0.177706	0.363674	0.421497	0.175742	-0.0914923	0.927472	0.611715	-0.0810343	0.717387	0.4246	10	10	10	20.8	20.8	20.8	59.256	0	62.182	603830000	41
PC	Pyruvate carboxylase, mitochondrial	P11498;P11498-2	P11498			-0.0198638	-0.18244	0.202304	-0.201167	-1.10178	-0.710553	-0.951722	-0.081267	-0.107545	0.492786	0.125633	-0.0602404	48	48	48	56.8	56.8	56.8	129.63	0	323.31	67498000000	1192
MTHFD1	C-1-tetrahydrofolate synthase, cytoplasmic;Methylenetetrahydrofolate dehydrogenase;Methenyltetrahydrofolate cyclohydrolase;Formyltetrahydrofolate synthetase;C-1-tetrahydrofolate synthase, cytoplasmic, N-terminally processed	P11586	P11586			0.0316168	-0.091245	0.0596282	0.36566	0.345107	0.297534	0.413977	0.545994	0.585398	0.413697	0.61938	0.170527	29	29	29	35.4	35.4	35.4	101.56	0	246.29	3694100000	241
ADH5	Alcohol dehydrogenase class-3	P11766	P11766			-0.0187464	NaN	0.0187464	0.620839	0.955058	0.440566	0.841258	1.3336	0.757646	0.820342	0.50771	0.635049	3	3	3	8.8	8.8	8.8	39.724	0	19.353	287450000	12
PRPS2	Ribose-phosphate pyrophosphokinase 2	P11908;P11908-2	P11908;P11908-2			-0.0318063	0.207032	-0.175226	0.475852	0.850178	0.226954	0.390181	1.2774	0.694714	0.105376	0.257079	0.352416	7	7	2	25.2	25.2	7.9	34.769	0	49.25	892050000	55
PABPC1;PABPC3	Polyadenylate-binding protein 1;Polyadenylate-binding protein 3	P11940-2;P11940;Q9H361;Q4VXU2;Q4VXU2-2;Q5JQF8;Q96DU9-2;Q96DU9	P11940-2;P11940;Q9H361			-0.0930201	-0.10604	0.19906	0.328868	0.197595	0.529901	0.618001	0.801568	0.830291	-0.144131	-0.160742	0.285701	17	17	11	30.2	30.2	20.1	61.18	0	109.22	1516200000	74
PCNA	Proliferating cell nuclear antigen	P12004	P12004			0.00983556	-0.0140235	0.0041879	0.395885	0.399242	0.211093	0.411376	0.117032	0.902019	0.0601934	0.586034	0.148097	10	10	10	45.6	45.6	45.6	28.768	0	130.03	3481000000	134
HARS	Histidine--tRNA ligase, cytoplasmic	P12081-3;P12081-2;P12081-4;P12081;P49590-2;P49590	P12081-3;P12081-2;P12081-4;P12081			-0.0634174	0.223413	-0.159996	0.00370407	0.254665	0.252254	0.436131	0.429356	0.363899	0.178141	0.0842018	0.0842838	12	12	12	28.5	28.5	28.5	50.156	0	102.94	938790000	84
SLC25A6	ADP/ATP translocase 3;ADP/ATP translocase 3, N-terminally processed	P12236	P12236			-0.2409	-0.084816	0.325716	0.445694	0.570293	0.224361	0.922569	0.286591	0.659353	0.311567	0.418467	-0.0226154	11	3	2	34.9	11.1	7.4	32.866	0	27.23	1760300000	51
IMPDH2	Inosine-5-monophosphate dehydrogenase 2	P12268;P20839-2;P20839-4;P20839;P20839-3;P20839-7;P20839-5;P20839-6	P12268			0.0252806	-0.046552	0.0212714	-0.561727	-0.456901	-0.712549	-0.146486	-0.200137	0.306262	-0.0855707	0.117324	-0.448568	15	15	15	33.3	33.3	33.3	55.804	0	117.72	2527100000	147
CKB	Creatine kinase B-type	P12277;P06732	P12277			-0.0959549	0.144793	-0.0488377	0.43438	0.503637	0.449493	0.640495	0.898113	1.01951	0.589621	0.831734	0.238533	16	16	16	61.4	61.4	61.4	42.644	0	236.28	12204000000	280
XRCC6	X-ray repair cross-complementing protein 6	P12956;P12956-2	P12956;P12956-2			0.00658862	-0.0906766	0.084088	0.351712	0.548812	0.240212	0.607016	0.65889	0.802136	0.678799	0.625336	0.456511	22	22	22	42.5	42.5	42.5	69.842	0	243.92	6476800000	288
XRCC5	X-ray repair cross-complementing protein 5	P13010	P13010			0.153505	-0.0555369	-0.0979678	0.306917	0.199359	0.232574	0.602651	0.653802	0.973609	0.262285	0.760469	0.529735	16	16	16	25	25	25	82.704	0	169.98	4075600000	163
RNH1	Ribonuclease inhibitor	P13489	P13489			-0.0995973	-0.162916	0.262513	0.518786	0.52098	0.230498	0.8212	0.475598	0.600671	0.0503565	1.0725	0.331999	3	3	3	8.9	8.9	8.9	49.973	0	34.749	593720000	42
EEF2	Elongation factor 2	P13639	P13639			0.0387217	-0.0407232	0.00200144	-0.0664209	0.0126578	-0.120197	-0.0117029	0.0424468	-0.206119	-0.0472062	-0.10247	-0.0292447	38	38	37	45.3	45.3	44.2	95.337	0	323.31	39051000000	641
PDIA4	Protein disulfide-isomerase A4	P13667	P13667			-0.114746	0.120207	-0.00546074	0.0530357	0.255247	0.264023	0.274115	0.578709	0.365616	-0.374285	0.262524	0.0177975	19	19	19	34.3	34.3	34.3	72.932	0	154.06	2807200000	199
TPT1	Translationally-controlled tumor protein;TPT1-like protein	P13693;P13693-2;Q56UQ5	P13693;P13693-2;Q56UQ5			-0.251823	0.358614	-0.106791	-0.64069	-0.326387	-0.57601	-0.988827	NaN	NaN	-0.447603	-0.691118	-1.02785	4	4	4	25.6	25.6	25.6	19.595	0	28.783	619250000	21
LCP1	Plastin-2	P13796;P13796-2	P13796			0.317159	NaN	-0.317159	0.171371	1.07365	-0.18926	0.161859	NaN	0.337722	-0.471156	NaN	0.239903	8	5	5	14.5	9.6	9.6	70.288	0	35.217	277810000	28
PLS3	Plastin-3	P13797-2;P13797;P13797-3;Q14651	P13797-2;P13797;P13797-3			0.0664686	0.121215	-0.187684	0.260505	0.476173	0.181239	0.815698	1.04579	0.924947	0.413425	0.825862	-0.00872866	17	17	14	31.6	31.6	26.6	69.35	0	166.38	4256000000	202
ETFA	Electron transfer flavoprotein subunit alpha, mitochondrial	P13804-2;P13804	P13804-2;P13804			-0.273597	NaN	0.273597	0.722531	0.809947	0.731013	0.78155	1.05793	0.378398	0.342158	0.228332	0.203031	4	4	4	19.7	19.7	19.7	30.025	0	27.786	296120000	27
FDPS	Farnesyl pyrophosphate synthase	P14324-2;P14324	P14324-2;P14324			-0.147462	-0.292743	0.440205	0.788684	0.293002	0.503779	0.79118	0.05955	0.526124	0.01813	0.700947	0.327868	5	5	5	17.6	17.6	17.6	40.532	0	36.213	732360000	34
PKM	Pyruvate kinase PKM	P14618;P14618-3;P14618-2;P30613-2;P30613	P14618;P14618-3;P14618-2			0.209688	0.0164719	-0.22616	0.403494	0.43413	0.33514	0.815056	0.89061	1.23245	0.692692	0.679501	0.536268	28	28	28	57.3	57.3	57.3	57.936	0	323.31	38076000000	589
HSP90B1	Endoplasmin	P14625;Q58FF3	P14625			0.141724	0.102873	-0.244596	0.0256462	0.286243	0.228064	0.385107	0.640322	0.530897	-0.102331	0.31538	-0.0139027	26	24	24	38	36.2	36.2	92.468	0	254.31	10926000000	326
HNRNPL	Heterogeneous nuclear ribonucleoprotein L	P14866;P14866-2	P14866;P14866-2			0.140757	-0.187129	0.0463721	-0.346242	-0.560027	-1.23839	-0.176578	NaN	NaN	-0.444969	NaN	-0.547666	8	8	8	22.9	22.9	22.9	64.132	0	63.885	414090000	38
DARS	Aspartate--tRNA ligase, cytoplasmic	P14868;P14868-2	P14868;P14868-2			-0.193302	0.025444	0.167858	0.185663	0.172531	0.294039	0.379688	0.622301	0.397425	0.185663	0.125963	-0.0999908	14	14	14	33.7	33.7	33.7	57.136	0	114.09	1657100000	112
JUP	Junction plakoglobin	P14923	P14923			-0.293197	0.463874	-0.170677	-1.71965	-1.35366	-0.149892	-1.40411	-1.3702	-1.1738	-0.509073	-1.53177	-1.06142	12	12	11	18	18	17	81.744	0	98.874	673650000	35
AKR1B1;AKR1B15	Aldose reductase;Aldo-keto reductase family 1 member B15	P15121;C9JRZ8;C9JRZ8-2	P15121;C9JRZ8;C9JRZ8-2			-0.0151107	1.65304e-05	0.0150941	0.318796	0.635671	-1.17451	-0.241179	-0.177451	-1.06819	0.476144	-1.97898	0.34807	2	2	2	6	6	6	35.853	0	13.596	256070000	19
GSPT1;GSPT2	Eukaryotic peptide chain release factor GTP-binding subunit ERF3A;Eukaryotic peptide chain release factor GTP-binding subunit ERF3B	P15170-2;P15170-3;P15170;Q8IYD1	P15170-2;P15170-3;P15170;Q8IYD1			-0.0797049	-0.143025	0.22273	-0.0487582	0.270023	0.119584	0.259471	-0.667678	-0.432286	NaN	-0.56609	0.214065	8	8	8	13.7	13.7	13.7	68.6	0	62.05	572750000	79
EZR	Ezrin	P15311;P35241-3	P15311			-0.31844	0.122941	0.195499	-0.015206	0.202312	-0.247853	0.207012	0.502105	0.623979	0.402778	0.322238	0.171281	15	15	9	22.4	22.4	14.3	69.412	0	98.744	1967400000	111
RPS2	40S ribosomal protein S2	P15880	P15880			-0.142844	0.00104268	0.141801	0.0611356	0.235933	0.108104	0.203626	0.745315	0.037494	-0.138976	0.266883	0.154905	10	10	10	35.8	35.8	35.8	31.324	0	102.25	5040700000	119
DSP	Desmoplakin	P15924;P15924-3;P15924-2	P15924;P15924-3;P15924-2			-0.119155	0.346721	-0.227566	-1.7953	-2.69578	-0.984334	-2.11875	-2.71674	-3.92208	-1.50841	-2.31544	-1.84035	54	54	54	19.3	19.3	19.3	331.77	0	323.31	1830600000	115
CBR1	Carbonyl reductase [NADPH] 1	P16152;P16152-2	P16152;P16152-2			0.0682386	-0.166634	0.0983957	0.714408	1.00383	0.54136	0.725795	1.29068	1.36457	0.905305	0.747274	0.454612	9	9	8	51.3	51.3	45.5	30.375	0	82.491	1326900000	76
POR	NADPH--cytochrome P450 reductase	P16435	P16435			0.227246	-0.227246	NaN	0.347022	0.540021	-0.157071	0.00233936	-0.332681	-0.319989	NaN	0.102359	0.444198	4	4	4	5.2	5.2	5.2	76.689	0	24.617	135650000	25
ATP2A2	Sarcoplasmic/endoplasmic reticulum calcium ATPase 2	P16615;P16615-5;P16615-2;P16615-3;P16615-4;O14983-2;O14983;O14983-3;Q93084-4;Q93084-2;Q93084-3;Q93084-7;Q93084;Q93084-6;Q93084-5	P16615;P16615-5;P16615-2;P16615-3;P16615-4			-0.23355	-0.000916163	0.234466	1.94234	1.74195	1.64523	2.34533	2.31517	1.92939	2.25688	2.52872	2.28299	33	33	33	33.5	33.5	33.5	114.76	0	323.31	13806000000	357
HSPA6;HSPA7	Heat shock 70 kDa protein 6;Putative heat shock 70 kDa protein 7	P17066;P48741	P17066;P48741			0.548322	-0.265198	-0.283124	-0.412112	-0.0655371	0.0709279	-0.627097	NaN	NaN	0.211395	-0.193764	0.103265	9	1	1	15.1	1.7	1.7	71.027	0	14.047	5233000000	39
GOT1	Aspartate aminotransferase, cytoplasmic	P17174;P17174-2	P17174;P17174-2			-0.0601807	-0.115654	0.175835	0.408688	0.520798	0.764519	0.676075	0.503599	0.824844	0.885727	0.516369	0.276146	10	10	10	31.7	31.7	31.7	46.247	0	68.335	866130000	63
CAPN2	Calpain-2 catalytic subunit	P17655;P17655-2	P17655;P17655-2			0.190511	-0.154309	-0.0362021	0.49472	0.4969	0.441692	0.655835	0.0168641	-0.314156	0.281869	-0.0847594	0.223901	7	7	7	10.6	10.6	10.6	79.994	0	53.124	448640000	28
DDX5	Probable ATP-dependent RNA helicase DDX5	P17844-2;P17844	P17844-2;P17844			-0.0825151	-0.16088	0.243395	-0.188405	-0.935167	-0.650016	-0.389806	-0.719657	-0.248203	-0.368837	-0.167154	-0.15171	11	9	9	19.1	15.3	15.3	60.563	0	57.327	790240000	65
PFKL	ATP-dependent 6-phosphofructokinase, liver type	P17858;P17858-2	P17858;P17858-2			0.164369	-0.433951	0.269582	0.179868	0.250724	0.0954336	0.449203	0.256517	0.390674	NaN	-0.173892	-0.0781199	8	5	5	12.2	7.4	7.4	85.018	0	33.408	566180000	7
PSMC3	26S protease regulatory subunit 6A	P17980	P17980			0.226152	-0.0793076	-0.146845	0.644693	0.911367	0.472792	0.810854	0.769737	0.807213	0.774969	0.695738	0.410433	7	7	7	22.8	22.8	22.8	49.203	0	44.743	573950000	35
TCP1	T-complex protein 1 subunit alpha	P17987	P17987			-0.0103079	-0.040219	0.0505269	0.541229	0.615926	0.319185	0.499601	1.03162	0.722928	0.694516	0.928298	0.450128	24	24	24	47.8	47.8	47.8	60.343	0	319.1	8073000000	294
RPL35A	60S ribosomal protein L35a	P18077	P18077			-0.102393	-0.215778	0.318171	-0.149629	-0.42345	-0.439041	-0.215501	-0.414827	-0.405494	-0.12129	-0.348844	-0.397165	5	5	5	38.2	38.2	38.2	12.538	0	29.679	689360000	47
ARF4	ADP-ribosylation factor 4	P18085	P18085			-0.216803	0.153168	0.0636349	0.29513	0.528727	0.407427	1.10077	0.874012	1.19004	0.625229	0.903391	0.474758	6	6	4	37.2	37.2	19.4	20.511	0	50.524	1393400000	79
RPL7	60S ribosomal protein L7	P18124	P18124			-0.153666	-0.311205	0.46487	-0.156206	-0.257298	-0.214153	-0.252363	-0.383106	0.0615597	-0.0169048	0.193527	0.0247536	12	12	12	44	44	44	29.225	0	107.72	5100400000	202
VCL	Vinculin	P18206-2;P18206;P18206-3	P18206-2;P18206			0.0114568	0.0212568	-0.0327136	-0.295796	-0.0297343	-0.494565	-0.189177	-0.547799	-0.452834	-0.16924	-0.284104	-0.0964915	28	28	28	29.3	29.3	29.3	116.72	0	231.04	2904000000	243
RPL17	60S ribosomal protein L17	P18621;P18621-3;P18621-2	P18621;P18621-3;P18621-2			0.080712	0.114281	-0.194993	-0.024236	-0.249086	-0.31339	-0.294389	-0.0718721	-0.778079	-0.506679	-0.567447	-0.527454	7	7	7	37	37	37	21.397	0	65.191	3396800000	104
PGAM1;PGAM2	Phosphoglycerate mutase 1;Phosphoglycerate mutase 2	P18669;P15259;Q8N0Y7	P18669;P15259			0.0289256	-0.306613	0.277688	0.231591	0.0842559	0.51701	-0.0519937	0.466593	-0.0376809	0.694251	0.532002	0.438737	9	9	9	38.2	38.2	38.2	28.804	0	81.409	1767300000	87
NCL	Nucleolin	P19338	P19338			0.313386	-0.0602258	-0.25316	-0.847358	-0.100656	-0.348443	-0.23491	-0.51806	-0.223564	-0.382848	0.197653	-0.06545	18	18	18	26.8	26.8	26.8	76.613	0	199.32	4580700000	237
HK1	Hexokinase-1	P19367-4;P19367-2;P19367;P19367-3;P52789	P19367-4;P19367-2;P19367;P19367-3			-0.190814	-0.115154	0.305968	0.370999	0.161532	0.203499	-0.0423692	-0.265088	-0.386699	0.124215	0.14948	0.384185	12	12	11	13.8	13.8	12.8	101.08	0	78.726	754280000	54
SRM	Spermidine synthase	P19623	P19623			0.32862	-0.0927569	-0.235863	1.04489	0.991536	1.10693	0.90991	1.18204	1.98877	1.01418	1.88358	0.667486	5	5	5	20.9	20.9	20.9	33.824	0	38.693	625860000	59
EIF2S2	Eukaryotic translation initiation factor 2 subunit 2	P20042	P20042			-0.149314	0.0592492	0.0900644	0.386638	-0.106665	0.364074	-0.373673	0.0622228	0.100751	0.089927	0.403686	0.166839	5	5	5	18.6	18.6	18.6	38.388	0	34.774	229380000	15
PSMB1	Proteasome subunit beta type-1	P20618	P20618			-0.0608749	0.148661	-0.0877857	0.0143127	0.811487	0.221189	0.449987	-0.036005	0.412954	NaN	0.486153	-0.0189228	4	4	4	17.4	17.4	17.4	26.489	0	27.149	506900000	41
FLNA	Filamin-A	P21333-2;P21333;Q14315-2;Q14315	P21333-2;P21333			-0.0942008	0.106153	-0.0119521	-0.461442	-0.57062	-0.558734	-0.43224	-0.567521	-0.381735	0.050443	-0.0244624	-0.219065	69	69	63	34.9	34.9	32.9	280.01	0	323.31	14871000000	775
VDAC1	Voltage-dependent anion-selective channel protein 1	P21796	P21796			-0.556368	-0.0635223	0.61989	0.480459	-0.124905	0.27717	0.114092	-0.182257	0.0196362	0.0230713	0.790291	0.13888	4	4	4	12.4	12.4	12.4	30.772	0	35.08	1051500000	51
SDHB	Succinate dehydrogenase [ubiquinone] iron-sulfur subunit, mitochondrial	P21912	P21912			-0.0824445	0.157153	-0.0747083	0.292046	0.215411	0.167739	0.0691039	-0.48841	0.540585	0.521065	0.501147	0.259404	4	4	4	15.7	15.7	15.7	31.629	0	25.706	243110000	28
GART	Trifunctional purine biosynthetic protein adenosine-3;Phosphoribosylamine--glycine ligase;Phosphoribosylformylglycinamidine cyclo-ligase;Phosphoribosylglycinamide formyltransferase	P22102;P22102-2	P22102			-0.111769	0.175142	-0.0633723	0.090566	-0.0700061	0.102142	0.165119	0.0538572	0.501142	-0.283631	0.113931	0.0889142	15	15	15	19	19	19	107.77	0	111.25	1105300000	68
PAICS	Multifunctional protein ADE2;Phosphoribosylaminoimidazole-succinocarboxamide synthase;Phosphoribosylaminoimidazole carboxylase	P22234;P22234-2	P22234;P22234-2			0.167063	-0.104614	-0.0624485	0.305323	0.303812	0.525864	0.730255	0.9571	0.949993	0.808392	0.70429	0.0570354	12	12	12	26.6	26.6	26.6	47.079	0	104.36	2081600000	162
UBA1	Ubiquitin-like modifier-activating enzyme 1	P22314-2;P22314	P22314-2;P22314			0.209658	0.0880966	-0.297754	0.0635643	0.183512	0.00207138	0.521471	0.617348	0.321991	0.582659	0.620039	0.271505	34	34	34	42.3	42.3	42.3	113.8	0	323.31	16281000000	509
NME2	Nucleoside diphosphate kinase B	P22392-2;P22392;O60361	P22392-2;P22392			-0.143746	0.228139	-0.0843932	0.214006	0.438444	0.523019	0.370645	0.648786	0.0540021	0.352081	0.438167	0.333154	12	12	4	66.3	66.3	16.5	30.137	0	92.868	6534600000	168
HNRNPA2B1	Heterogeneous nuclear ribonucleoproteins A2/B1	P22626;P22626-2	P22626;P22626-2			-0.205269	-0.0348854	0.240154	-0.200924	-0.215534	0.189705	-0.156315	0.498043	-0.642456	0.324881	0.256744	0.133957	12	12	12	42.8	42.8	42.8	37.429	0	101.3	1722500000	73
UQCRC2	Cytochrome b-c1 complex subunit 2, mitochondrial	P22695	P22695			-0.0155156	-0.0245946	0.0401103	0.883778	0.667617	0.343287	0.0895774	0.193144	1.08063	0.147927	0.319007	0.527522	8	8	8	25.4	25.4	25.4	48.442	0	63.99	889080000	47
PPIB	Peptidyl-prolyl cis-trans isomerase B	P23284	P23284			0.12092	0.0629692	-0.183889	-0.137089	0.0949135	0.0906258	0.915552	0.0713253	0.132023	-0.30352	0.904654	0.0448761	8	8	8	39.8	39.8	39.8	23.742	0	59.717	1574300000	62
ME2	NAD-dependent malic enzyme, mitochondrial	P23368;P23368-2;Q16798-2;Q16798	P23368;P23368-2			0.0164121	-0.0164363	2.41597e-05	0.226621	0.32376	0.575437	-0.0911223	0.172551	0.283323	NaN	0.0371469	0.597926	6	6	6	10.6	10.6	10.6	65.443	0	42.807	388710000	38
WARS	Tryptophan--tRNA ligase, cytoplasmic;T1-TrpRS;T2-TrpRS	P23381;P23381-2	P23381;P23381-2			0.0588856	-0.209967	0.151081	-0.536282	-0.551989	-0.197889	-0.966921	-0.983864	0.471714	-0.796841	-0.500996	-0.746454	5	5	5	13.6	13.6	13.6	53.165	0	31.455	450130000	23
RPS3	40S ribosomal protein S3	P23396;P23396-2	P23396;P23396-2			0.0774295	-0.130765	0.0533358	0.303692	0.534365	0.25725	0.700429	0.31437	0.521521	-0.0975011	0.360129	0.193904	13	13	13	63.8	63.8	63.8	26.688	0	114.91	6095900000	155
AHCY	Adenosylhomocysteinase	P23526;P23526-2	P23526;P23526-2			-0.0202618	0.124817	-0.104555	0.237869	0.223604	0.262806	0.33161	0.521151	0.546585	0.297682	0.538515	0.10309	15	15	15	39.1	39.1	39.1	47.716	0	169.57	5640300000	202
CFL1	Cofilin-1	P23528;Q9Y281-3;Q9Y281	P23528			-0.248567	0.230078	0.0184886	0.965033	1.09274	0.946337	1.18728	1.28076	1.93264	0.647572	1.25337	0.650881	10	10	9	68.7	68.7	64.5	18.502	0	153.29	8442100000	169
RRM1	Ribonucleoside-diphosphate reductase large subunit	P23921	P23921			-0.000636419	-0.171153	0.17179	0.0757434	0.106518	-0.096578	0.0939166	-0.140832	0.20975	-0.253747	0.139739	0.171754	8	8	8	13.5	13.5	13.5	90.069	0	64.561	1017300000	94
EEF1B2	Elongation factor 1-beta	P24534	P24534			0.133688	0.0573273	-0.191015	0.157751	0.257069	0.267216	0.432217	0.435369	0.811327	-0.086874	0.513851	-0.146391	4	4	4	24.4	24.4	24.4	24.763	0	87.422	3110000000	40
ATP5F1	ATP synthase F(0) complex subunit B1, mitochondrial	P24539	P24539			0.00332069	-0.20656	0.203239	-0.39197	-0.124338	-0.033329	-1.06244	NaN	-1.45651	-0.325964	-0.360292	0.0120525	4	4	4	16.4	16.4	16.4	28.908	0	24.112	208600000	24
ACAT1	Acetyl-CoA acetyltransferase, mitochondrial	P24752;P24752-2	P24752			-0.121265	-0.126516	0.24778	0.640689	0.340933	0.286746	0.820969	0.21823	0.420424	0.605698	0.585192	0.560609	10	10	10	33.3	33.3	33.3	45.199	0	117.28	1424300000	83
MCM3	DNA replication licensing factor MCM3	P25205;P25205-2	P25205;P25205-2			0.0779622	-0.0859419	0.00797971	0.409091	0.429706	0.694082	0.887611	1.06736	0.984683	0.00695546	0.80186	0.484565	15	15	15	21	21	21	90.98	0	93.893	927030000	51
RPS12	40S ribosomal protein S12	P25398	P25398			-0.214931	0.329466	-0.114534	0.285437	0.219744	0.278408	0.645786	0.054266	0.604483	0.133999	1.54471	0.0754566	5	5	5	48.5	48.5	48.5	14.515	0	46.306	1658500000	35
ATP5A1	ATP synthase subunit alpha, mitochondrial	P25705;P25705-2;P25705-3	P25705;P25705-2;P25705-3			-0.0697346	0.0460892	0.0236454	0.566263	0.611805	0.215147	0.897493	0.680893	0.79612	0.55081	0.793203	0.374599	21	21	21	44.1	44.1	44.1	59.75	0	241.94	8993000000	264
PSMA1	Proteasome subunit alpha type-1	P25786;P25786-2	P25786;P25786-2			-0.210586	-0.0798467	0.290433	0.166436	-0.0422395	0.320897	0.331742	-0.436721	0.169415	0.758794	0.711714	0.688927	5	5	5	18.3	18.3	18.3	29.555	0	32.533	654370000	63
PSMA2	Proteasome subunit alpha type-2	P25787	P25787			0.106555	NaN	-0.106555	0.18537	0.820264	0.488639	-0.136558	0.348584	0.846574	0.952041	NaN	0.783435	6	6	6	38	38	38	25.898	0	38.023	622540000	23
PSMA3	Proteasome subunit alpha type-3	P25788-2;P25788	P25788-2;P25788			-0.0309496	0.0309496	NaN	-0.155715	NaN	0.615014	0.839002	0.290708	NaN	0.713487	0.268226	0.563655	5	5	5	23.8	23.8	23.8	27.647	0	36.603	404160000	35
PSMA4	Proteasome subunit alpha type-4	P25789;P25789-2	P25789;P25789-2			0.0108484	-0.0998828	0.0890344	0.243167	0.438043	0.429492	0.241224	0.0671495	-0.131589	-0.060496	-0.464247	0.138751	7	7	7	22.2	22.2	22.2	29.483	0	50.167	1414900000	82
MSN	Moesin	P26038	P26038			-0.125263	0.0832081	0.0420551	-0.125471	-0.0576992	0.10264	-0.519306	-0.381168	-0.163902	0.0219727	0.781412	0.265879	13	7	7	17.9	9.7	9.7	67.819	0	48.963	466920000	67
DDX6	Probable ATP-dependent RNA helicase DDX6	P26196	P26196			0.0370909	0.119214	-0.156305	0.535271	0.230223	-0.025205	0.455615	0.83132	0.936732	-0.113338	0.533364	0.269435	5	5	5	14.5	14.5	14.5	54.416	0	43.289	585000000	41
U2AF2	Splicing factor U2AF 65 kDa subunit	P26368-2;P26368	P26368-2;P26368			-0.0533415	0.222715	-0.169373	0.60712	0.630945	0.37766	0.612466	1.32095	1.44379	0.373798	0.698205	0.42608	5	5	5	16.3	16.3	16.3	53.12	0	38.25	429640000	21
RPL13	60S ribosomal protein L13	P26373;P26373-2	P26373;P26373-2			0.0472329	0.225549	-0.272782	-1.02935	-0.575474	-0.804162	-0.336287	-1.37258	-0.604394	-0.626389	-0.125655	-0.721469	13	13	13	52.6	52.6	52.6	24.261	0	307.55	24488000000	270
HMGB2	High mobility group protein B2	P26583	P26583			-0.821817	0.371127	0.45069	-0.231201	-0.181815	-0.608848	-0.629764	NaN	-0.648383	NaN	NaN	0.176692	2	2	2	12.9	12.9	12.9	24.033	0	14.434	274280000	28
PTBP1	Polypyrimidine tract-binding protein 1	P26599;P26599-2;P26599-3;O95758-1;O95758-6;O95758-2;O95758;O95758-5;O95758-4;O95758-7	P26599;P26599-2;P26599-3			0.0710278	0.0849552	-0.155983	0.769598	0.308153	0.314493	1.04993	0.756672	1.13398	0.641888	1.07242	0.22485	7	7	7	19.6	19.6	19.6	57.221	0	69.086	953800000	38
TARS	Threonine--tRNA ligase, cytoplasmic	P26639;P26639-2;A2RTX5-2;A2RTX5	P26639;P26639-2			0.100629	0.0850398	-0.185668	0.0745646	-0.0798334	0.0768	0.395066	0.388793	0.356631	0.314032	0.685275	0.152302	20	20	20	28.9	28.9	28.9	83.434	0	158.97	2536300000	198
VARS	Valine--tRNA ligase	P26640;P26640-2	P26640			-0.318311	0.180949	0.137362	0.138667	-0.269246	-0.204133	0.0374591	0.343049	-0.16228	0.720156	0.010512	0.0397116	13	13	13	12.4	12.4	12.4	140.47	0	100.61	1312500000	80
EEF1G	Elongation factor 1-gamma	P26641;P26641-2	P26641;P26641-2			0.0127926	0.0315495	-0.044342	0.185745	0.123983	0.300512	0.294516	0.63389	0.121552	-0.00111008	0.345932	0.0828743	18	18	18	41.2	41.2	41.2	50.118	0	182.21	8198600000	252
YWHAQ	14-3-3 protein theta	P27348	P27348			-0.0378857	0.117142	-0.0792561	-0.187675	-0.264616	-0.415792	-0.0678616	-0.0759468	-0.173712	-1.46189	-0.571642	-0.560585	12	10	9	46.1	38.8	35.1	27.764	0	247.12	4585800000	103
RPL10	60S ribosomal protein L10	P27635;Q96L21	P27635			-0.140741	-0.029232	0.169973	-0.56702	-0.751156	0.0690269	-0.484535	-0.591919	NaN	-0.125021	-0.491764	-0.490282	5	5	5	20.1	20.1	20.1	24.604	0	45.911	1372600000	53
RPA1	Replication protein A 70 kDa DNA-binding subunit;Replication protein A 70 kDa DNA-binding subunit, N-terminally processed	P27694	P27694			-0.0651048	0.191386	-0.126281	0.00910823	-0.0448144	0.105809	0.0216452	NaN	-0.533136	-0.286455	NaN	-0.0390085	6	6	6	11.4	11.4	11.4	68.137	0	40.318	240450000	28
APEX1	DNA-(apurinic or apyrimidinic site) lyase;DNA-(apurinic or apyrimidinic site) lyase, mitochondrial	P27695	P27695			0.199257	-0.185316	-0.0139408	-0.148684	0.0543213	-0.135063	0.278824	NaN	-0.0327015	-0.436367	NaN	0.175694	4	4	4	17	17	17	35.554	0	25.827	371260000	26
CAD	CAD protein;Glutamine-dependent carbamoyl-phosphate synthase;Aspartate carbamoyltransferase;Dihydroorotase	P27708	P27708			0.341471	-0.099769	-0.241702	NaN	-0.874862	NaN	0.159474	-0.318197	NaN	-0.0378145	NaN	-0.582549	5	5	5	2.6	2.6	2.6	242.98	0	47.015	113010000	15
CALR	Calreticulin	P27797	P27797			-0.170984	0.0475426	0.123442	-0.273544	0.121136	0.0676765	-0.615677	-0.221697	0.0914001	-0.795223	0.338755	0.0136375	8	8	8	27.6	27.6	27.6	48.141	0	65.34	2035400000	109
CANX	Calnexin	P27824;P27824-2;P27824-3	P27824;P27824-2;P27824-3			0.216434	0.0574856	-0.27392	0.187021	0.330051	0.20813	0.205719	0.117229	0.441832	0.231163	0.737291	0.205448	12	12	12	22.6	22.6	22.6	67.567	0	86.359	2057600000	124
PSMA5	Proteasome subunit alpha type-5	P28066;P28066-2	P28066;P28066-2			-0.216782	0.0240364	0.192745	-0.0553665	0.13208	-0.281553	-0.551624	NaN	-0.0847187	-0.230766	0.403273	-0.22809	5	5	5	24.1	24.1	24.1	26.411	0	51.138	694290000	59
PSMB6	Proteasome subunit beta type-6	P28072	P28072			-0.0853958	0.0767097	0.00868607	-0.344219	-0.242792	0.00966263	-0.0998783	-0.633091	-2.19294	-0.737867	-0.670605	0.13962	3	3	3	13	13	13	25.357	0	22.917	393260000	34
PSMB5	Proteasome subunit beta type-5	P28074;P28074-3;P28074-2	P28074;P28074-3			-0.086607	-0.0503139	0.136921	-0.020031	0.00611877	0.273457	-0.442924	-0.989586	0.360928	0.130245	NaN	0.609636	7	7	7	30.8	30.8	30.8	28.48	0	71.277	726310000	81
NDUFS1	NADH-ubiquinone oxidoreductase 75 kDa subunit, mitochondrial	P28331-4;P28331-5;P28331;P28331-2;P28331-3	P28331-4;P28331-5;P28331;P28331-2;P28331-3			-0.181688	0.141896	0.0397917	0.226737	0.171282	0.44912	0.249947	-0.517495	-0.0315526	0.318698	-0.207834	0.204461	7	7	7	12.8	12.8	12.8	73.527	0	48.621	456260000	25
MAPK1	Mitogen-activated protein kinase 1	P28482;P28482-2;P27361-2;P27361-3;P27361	P28482;P28482-2			0.364817	-0.233515	-0.131302	0.11116	-0.393253	0.1957	0.734617	NaN	0.0167961	-0.149996	0.713526	0.307175	4	4	4	10.8	10.8	10.8	41.389	0	43.954	240550000	20
TKT	Transketolase	P29401;P29401-2	P29401;P29401-2			-0.0392462	-0.0151107	0.0543569	0.239267	0.357658	0.158325	0.333917	0.0423578	0.0609258	0.291061	0.252227	0.451272	18	18	18	32.1	32.1	32.1	67.877	0	152.03	6570100000	236
EEF1D	Elongation factor 1-delta	P29692;P29692-2;P29692-3;P29692-4	P29692;P29692-2;P29692-3;P29692-4			0.468367	-0.197931	-0.270437	-0.410507	0.141879	-0.28116	0.125529	-0.386934	-0.325216	0.140107	0.525191	-0.099273	9	9	9	41.3	41.3	41.3	31.121	0	113.18	1404600000	94
MARCKS	Myristoylated alanine-rich C-kinase substrate	P29966	P29966			0.176977	-0.349448	0.172471	0.405687	0.580987	-0.0516593	-0.858084	-0.633727	NaN	0.525256	NaN	0.528987	4	4	4	25.3	25.3	25.3	31.554	0	35.196	265830000	29
PRDX6	Peroxiredoxin-6	P30041	P30041			-0.0605354	0.290701	-0.230165	0.301828	0.217833	0.105425	0.514187	0.757149	1.17011	0.68878	0.931326	0.16114	12	12	12	61.2	61.2	61.2	25.035	0	101.53	3641000000	147
DDT;DDTL	D-dopachrome decarboxylase;D-dopachrome decarboxylase-like protein	P30046;P30046-2;A6NHG4	P30046;P30046-2;A6NHG4			NaN	NaN	0	0.827135	1.11446	0.45215	0.24774	NaN	1.108	0.17531	1.14877	0.541058	3	3	3	27.1	27.1	27.1	12.712	0	20.021	352370000	13
PRDX3	Thioredoxin-dependent peroxide reductase, mitochondrial	P30048-2;P30048	P30048-2;P30048			-0.0223026	0.150799	-0.128496	0.490551	0.481794	0.337929	0.405849	1.01472	1.06681	0.18442	0.46834	0.309614	6	6	6	26.1	26.1	26.1	25.838	0	59.448	1492500000	111
RPL12	60S ribosomal protein L12	P30050;P30050-2	P30050;P30050-2			-0.0436974	-0.0431404	0.0868378	0.294106	0.387142	0.604988	1.09004	0.723503	0.781017	0.636623	0.654167	0.375134	5	5	5	33.9	33.9	33.9	17.818	0	43.571	2016900000	68
ECHS1	Enoyl-CoA hydratase, mitochondrial	P30084	P30084			-0.171609	-0.139273	0.310882	0.71586	0.145065	0.6779	0.454248	NaN	0.494613	0.683896	0.858924	0.509862	5	5	5	22.1	22.1	22.1	31.387	0	39.544	480180000	42
PEBP1	Phosphatidylethanolamine-binding protein 1;Hippocampal cholinergic neurostimulating peptide	P30086	P30086			0.0613346	-0.0323505	-0.0289841	-0.303101	0.391899	-0.0621319	0.256861	0.513662	0.619123	NaN	0.306192	-0.170805	7	7	7	58.8	58.8	58.8	21.057	0	114.82	3305100000	114
PDIA3	Protein disulfide-isomerase A3	P30101	P30101			0.0474332	0.12276	-0.170193	0.0875333	0.386417	0.0609182	0.0543092	-0.106703	-0.360041	0.297933	-0.0745379	0.287502	14	14	14	32.1	32.1	32.1	56.782	0	133.06	2460000000	198
PPP2R1A	Serine/threonine-protein phosphatase 2A 65 kDa regulatory subunit A alpha isoform	P30153;P30154-5;P30154-4;P30154;P30154-2;P30154-3	P30153			0.021527	0.132357	-0.153884	0.255902	0.253474	-0.0462507	0.143141	-0.110998	0.666781	-0.0787862	-0.226947	-0.165927	18	18	18	37.5	37.5	37.5	65.308	0	153.36	4705500000	213
NMT1	Glycylpeptide N-tetradecanoyltransferase 1	P30419;P30419-2	P30419;P30419-2			0.265673	-0.0634511	-0.202222	-0.688554	0.31133	-0.0590871	-1.01448	NaN	NaN	-0.15652	-0.950073	0.0987956	5	5	5	13.5	13.5	13.5	56.806	0	49.64	226790000	29
ADSS	Adenylosuccinate synthetase isozyme 2	P30520	P30520			-0.0228418	-0.0940984	0.11694	0.993867	1.08113	0.602261	0.392773	0.901053	1.22229	0.112752	1.24284	0.602349	5	5	5	14.7	14.7	14.7	50.097	0	37.309	415020000	32
ADSL	Adenylosuccinate lyase	P30566;P30566-2	P30566;P30566-2			0.473892	-0.43128	-0.0426121	0.687422	0.61503	0.150702	-0.137268	-0.355764	0.241264	0.856504	-0.227678	0.388142	5	5	5	11.4	11.4	11.4	54.889	0	39.566	464270000	64
SDHA	Succinate dehydrogenase [ubiquinone] flavoprotein subunit, mitochondrial	P31040-3;P31040-2;P31040	P31040-3;P31040-2;P31040			0.148754	-0.0752811	-0.073473	-0.150139	-0.140642	-0.408211	-0.251038	-0.44058	-0.595434	-0.0767632	-0.563705	0.01161	4	4	4	10.2	10.2	10.2	56.65	0	32.309	488550000	42
GDI1	Rab GDP dissociation inhibitor alpha	P31150	P31150			0.284534	-0.425297	0.140762	0.350031	0.31019	0.340076	0.415085	-0.347603	-0.581533	0.120815	-0.90951	0.621725	9	5	5	27.7	19.7	19.7	50.582	0	64.478	585720000	47
MAT2A	S-adenosylmethionine synthase isoform type-2	P31153;P31153-2;Q00266	P31153;P31153-2			-0.0560919	-0.0130889	0.0691808	0.23224	0.547885	0.353784	0.824287	1.38999	0.686347	0.0228799	0.71412	0.37899	7	7	7	19.5	19.5	19.5	43.66	0	50.991	1271600000	62
RRM2	Ribonucleoside-diphosphate reductase subunit M2	P31350;P31350-2	P31350;P31350-2			-0.106174	0.09191	0.0142638	0.298527	0.364136	-0.147273	0.531718	0.301421	0.916409	NaN	-0.051101	NaN	3	3	3	9.5	9.5	9.5	44.877	0	20.534	183480000	13
DNAJA1	DnaJ homolog subfamily A member 1	P31689;P31689-2	P31689;P31689-2			-0.233123	0.0642064	0.168916	-0.369939	-0.0216414	-0.0955264	-0.323132	0.113759	-0.0794055	0.0783037	-0.702504	-0.59579	6	6	6	24.9	24.9	24.9	44.868	0	48.687	953820000	57
UQCRC1	Cytochrome b-c1 complex subunit 1, mitochondrial	P31930	P31930			-0.0443376	-0.0196451	0.0639826	0.246779	0.47773	0.19332	0.246577	0.410241	0.223353	-0.431529	0.790436	0.513276	10	10	10	27.5	27.5	27.5	52.645	0	87.522	1196100000	69
ATIC	Bifunctional purine biosynthesis protein PURH;Phosphoribosylaminoimidazolecarboxamide formyltransferase;IMP cyclohydrolase	P31939-2;P31939	P31939-2;P31939			0.0876732	-0.0678539	-0.0198193	0.535889	0.431719	0.399061	1.02843	0.986498	0.694752	0.710766	0.64819	0.43055	16	16	16	36.2	36.2	36.2	64.523	0	157.48	2799000000	152
YWHAB	14-3-3 protein beta/alpha;14-3-3 protein beta/alpha, N-terminally processed	P31946-2;P31946	P31946-2;P31946			0.106445	0.0260983	-0.132544	-0.0633698	-0.135828	-0.417253	-0.28805	-0.967688	-0.858349	NaN	-0.632809	0.197044	8	5	4	39.8	28.7	25	27.85	0	74.778	2709800000	65
STIP1	Stress-induced-phosphoprotein 1	P31948;P31948-2;P31948-3	P31948;P31948-2;P31948-3			0.145507	-0.0154947	-0.130012	-0.0423711	0.0072848	-0.0615323	0.102069	-0.44407	0.0344416	-0.108156	0.369349	0.0586936	22	22	22	39.4	39.4	39.4	62.639	0	157.81	4498300000	245
S100A11	Protein S100-A11;Protein S100-A11, N-terminally processed	P31949	P31949			-0.0181777	-0.373219	0.391397	-0.127852	-0.796042	-0.00883929	-1.40511	-1.64727	-1.21033	-0.315526	-0.747395	-0.417906	3	3	3	23.8	23.8	23.8	11.74	0	19.377	365760000	43
PRDX2	Peroxiredoxin-2	P32119;P32119-2	P32119			0.183886	0.121247	-0.305133	-0.104133	0.375016	-0.000953039	0.0877787	-0.160661	-0.619306	-2.13942	-0.185636	0.0290209	8	7	7	36.4	30.8	30.8	21.892	0	49.88	3146500000	121
RPL9	60S ribosomal protein L9	P32969	P32969			0.0840219	-0.0878913	0.00386937	0.839233	0.708659	0.391958	1.20349	0.931781	1.10676	0.955247	0.904207	0.54078	5	5	5	26.6	26.6	26.6	21.863	0	45.943	1589300000	71
KIF5B	Kinesin-1 heavy chain	P33176;O60282;Q12840;O60282-2	P33176			0.0785427	-0.197624	0.119081	0.00546837	-0.330778	-0.19594	-0.414948	0.595715	-0.463228	0.272879	0.284389	-0.0343857	16	16	16	20	20	20	109.68	0	106.98	762690000	46
MCM4	DNA replication licensing factor MCM4	P33991	P33991			0.215473	-0.368036	0.152563	0.584286	-0.0799541	-0.072073	-0.248222	0.0898857	0.0524654	0.934084	NaN	0.407728	9	9	9	11.7	11.7	11.7	96.557	0	54.071	492800000	19
MCM5	DNA replication licensing factor MCM5	P33992	P33992			0.0726179	-0.175076	0.102458	0.449563	0.631456	0.166353	1.12067	0.702815	1.10049	0.66566	1.04793	0.669456	13	13	13	22.3	22.3	22.3	82.285	0	91.322	971660000	61
MCM7	DNA replication licensing factor MCM7	P33993;P33993-3;P33993-2	P33993;P33993-3			0.135458	-0.214283	0.078825	0.0959129	0.464102	0.520325	0.440718	0.18586	0.461781	0.800947	0.56868	0.37014	15	15	15	28.2	28.2	28.2	81.307	0	108.25	1406700000	101
SHMT2	Serine hydroxymethyltransferase, mitochondrial	P34897-3;P34897;P34897-2;P34896-4	P34897-3;P34897;P34897-2			0.0134741	-0.144752	0.131278	0.532727	0.326222	0.438576	0.272772	0.795531	0.662539	0.407311	0.654439	0.370747	17	17	16	37.3	37.3	34.4	53.454	0	135.04	3526400000	238
HSPA4	Heat shock 70 kDa protein 4	P34932;P34932-2	P34932			0.185003	0.037269	-0.222272	0.108034	0.23092	-0.25474	0.250671	0.0979436	0.386266	0.181671	0.438354	0.082105	32	32	31	47.5	47.5	45.6	94.33	0	323.31	8126800000	354
CTNNA1	Catenin alpha-1	P35221;P35221-2;P35221-3;P26232-4;P26232-6;Q9UI47	P35221;P35221-2;P35221-3			0.0828959	0.0170142	-0.0999101	-0.225568	-0.294366	-0.281244	-0.385278	-0.346265	-0.493858	-0.20078	-0.495	-0.129382	10	10	9	11.9	11.9	10.9	100.07	0	73.896	968580000	38
PHB	Prohibitin	P35232;P35232-2	P35232;P35232-2			-0.0296459	-0.22414	0.253786	0.53174	0.621183	0.605825	0.91667	1.13084	1.42319	0.810392	0.556307	0.332695	10	10	10	38.2	38.2	38.2	29.804	0	92.336	2127900000	110
SERPINB6	Serpin B6	P35237;P50452-2;P50452	P35237			0	NaN	NaN	0.127914	0.428677	0.167065	0.339209	-0.00941658	0.614384	0.323618	NaN	-0.116259	5	5	5	17.3	17.3	17.3	42.621	0	31.719	415530000	16
RPL22	60S ribosomal protein L22	P35268	P35268			-0.596436	0.0573483	0.539087	0.377989	-0.37792	-0.019598	0.277758	-0.111418	0.159225	0.79595	0.25841	0.416262	2	2	2	18.8	18.8	18.8	14.787	0	25.08	1790300000	41
MYH9	Myosin-9	P35579;P35579-2	P35579;P35579-2			-0.0686366	0.0682138	0.000422796	-0.470093	-0.825608	-0.531382	-0.0768878	0.390745	-0.21593	0.120218	0.247249	-0.641343	42	42	33	26.5	26.5	21.4	226.53	0	323.31	4148500000	283
MYH10	Myosin-10	P35580;P35580-5;P35580-2;P35580-3;P35580-4	P35580;P35580-5;P35580-2;P35580-3;P35580-4			-0.349116	0.299381	0.0497354	-1.01764	-1.59313	-1.53753	-1.02943	NaN	-1.55022	0.698987	0.362624	-1.48087	12	6	5	7.2	4.3	3.8	229	0	44.425	225670000	18
COPB2	Coatomer subunit beta	P35606-2;P35606	P35606-2;P35606			0.114621	0.00399145	-0.118613	0.0399907	0.362775	0.251634	0.401344	0.41825	0.180879	0.602052	0.353914	0.0278543	11	11	11	14.3	14.3	14.3	99.045	0	79.519	970610000	77
DEK	Protein DEK	P35659-2;P35659	P35659-2;P35659			-0.021616	-0.0425186	0.0641346	-0.230032	-0.26783	-0.318029	-0.271091	NaN	NaN	-0.30802	NaN	0.0257263	2	2	2	6.5	6.5	6.5	38.704	0.00088417	11.681	119650000	18
PSMC2	26S protease regulatory subunit 7	P35998;P35998-2	P35998;P35998-2			-0.0201473	-0.0590439	0.0791912	0.53014	0.472675	0.484186	0.443548	0.672997	0.512884	-0.102423	0.461111	0.567621	8	8	8	20.1	20.1	20.1	48.633	0	67.972	922410000	98
ATP5C1	ATP synthase subunit gamma, mitochondrial	P36542-2;P36542	P36542-2;P36542			-0.188617	-0.0681661	0.256783	0.17779	0.26145	0.184779	0.29847	NaN	0.117757	0.550584	0.275578	0.542758	4	4	4	14.1	14.1	14.1	32.881	0	27.388	320750000	21
RPL4	60S ribosomal protein L4	P36578	P36578			0.100984	-0.0206877	-0.0802962	0.0645803	0.0198797	-0.225506	0.565498	0.259193	0.543538	0.223981	0.580344	0.000228246	15	15	15	38.9	38.9	38.9	47.697	0	119.43	9109800000	179
PGM1	Phosphoglucomutase-1	P36871;P36871-2;P36871-3	P36871;P36871-2;P36871-3			-0.0757751	-0.0241261	0.0999012	0.32406	0.272629	0.164988	-0.0131264	0.522297	0.511335	0.635571	0.207401	0.350998	11	11	11	19.8	19.8	19.8	61.448	0	74.272	506020000	70
PPP1CC	Serine/threonine-protein phosphatase PP1-gamma catalytic subunit	P36873;P36873-2	P36873;P36873-2			NaN	-0.231345	0.231345	0.0768538	0.390374	-0.0646544	NaN	0.194812	0.665696	0.414611	0.689569	0.182103	3	2	2	11.8	7.4	7.4	36.983	0	14.76	150530000	15
SRP14	Signal recognition particle 14 kDa protein	P37108	P37108			0.0943699	-0.192766	0.0983963	0.362406	0.0664234	0.113579	-0.119509	0.458742	NaN	-0.0959988	NaN	0.0527172	3	3	3	25.7	25.7	25.7	14.57	0	27.976	371850000	34
FDFT1	Squalene synthase	P37268-5;P37268;P37268-4;P37268-3;P37268-2	P37268-5;P37268;P37268-4;P37268-3;P37268-2			NaN	NaN	0	0.541521	0.32551	0.151087	-0.279219	0.405699	0.624939	NaN	NaN	0.112768	5	5	5	15.8	15.8	15.8	43.06	0	32.774	203690000	20
TAGLN2	Transgelin-2	P37802;P37802-2;Q9UI15	P37802;P37802-2			0.0871048	-0.139236	0.0521317	-0.0220985	0.0283566	-0.0870361	0.200235	-0.0950642	0.328047	0.1544	0.703548	0.197128	11	11	11	63.3	63.3	63.3	22.391	0	169.15	7670100000	228
TALDO1	Transaldolase	P37837	P37837			-0.00292969	-0.0805607	0.0834904	0.321667	0.155142	0.213186	0.165455	-0.0157146	-0.246878	0.0071907	0.0162296	0.359783	10	10	10	30.9	30.9	30.9	37.54	0	84.429	1514600000	119
ETFB	Electron transfer flavoprotein subunit beta	P38117;P38117-2	P38117;P38117-2			-0.0285746	-0.051089	0.0796636	0.283944	0.466808	0.600759	-0.0982176	0.24525	0.399886	0.0689748	0.278245	-0.0860392	7	7	7	28.6	28.6	28.6	27.843	0	43.919	436130000	18
HSPA9	Stress-70 protein, mitochondrial	P38646	P38646			0.0765858	0.0931721	-0.169758	-0.0268307	0.204664	0.131908	0.146164	0.584988	0.717804	0.0945129	0.616114	-0.0141239	26	25	25	44.2	43.2	43.2	73.68	0	305.63	8399800000	377
EIF4A3	Eukaryotic initiation factor 4A-III;Eukaryotic initiation factor 4A-III, N-terminally processed	P38919	P38919			0.140682	0.0156663	-0.156348	0.364341	0.153962	0.205898	-0.163325	-0.124177	-0.0279662	-0.147097	-0.123929	0.0320924	15	11	11	31.1	25.3	25.3	46.871	0	76.832	994320000	90
RPL3	60S ribosomal protein L3	P39023;Q92901	P39023			0.00705401	0.119597	-0.126651	-0.508689	-0.402725	-0.468417	-0.336244	-0.696716	-0.30569	-0.507964	-0.294504	-0.43692	13	13	13	34.2	34.2	34.2	46.108	0	145.74	3966100000	171
ANP32A	Acidic leucine-rich nuclear phosphoprotein 32 family member A	P39687;O95626;O43423	P39687			0.145773	0.174099	-0.319872	-0.259361	0.135424	-0.0518875	0.0840912	-0.265261	-0.257866	-0.224182	-0.0081749	-0.212643	6	6	5	20.1	20.1	14.9	28.585	0	44.624	999720000	65
FEN1	Flap endonuclease 1	P39748;P39748-2	P39748;P39748-2			-0.195468	0.195468	NaN	0.649827	0.132308	0.522075	NaN	0.422414	0.800166	-0.0165358	NaN	0.196557	3	3	3	12.4	12.4	12.4	42.592	0	28.127	326380000	14
CCT6A	T-complex protein 1 subunit zeta	P40227;P40227-2;Q92526;Q92526-2;Q92526-3	P40227;P40227-2			0.00168864	0.0232779	-0.0249666	0.44386	0.424937	0.415639	0.657056	0.690942	0.96662	0.437947	0.826577	0.632905	19	19	19	37.3	37.3	37.3	58.024	0	220.82	8266600000	273
RPL13A;RPL13AP3	60S ribosomal protein L13a;Putative 60S ribosomal protein L13a protein RPL13AP3	P40429;Q6NVV1	P40429;Q6NVV1			-0.0306466	-0.512014	0.54266	0.032498	-0.864637	-0.753604	-1.41914	0.197104	0.000557582	0.417702	-0.367767	-0.19061	9	9	9	33.5	33.5	33.5	23.577	0	82.043	16176000000	225
STAT3	Signal transducer and activator of transcription 3	P40763-3;P40763-2;P40763	P40763-3;P40763-2;P40763			0.197532	0.184703	-0.382235	0.0492223	0.71788	0.166013	-0.179709	NaN	NaN	0.448819	0.327739	0.263032	3	3	3	6.6	6.6	6.6	83.125	0	18.289	158370000	7
MDH1	Malate dehydrogenase, cytoplasmic	P40925;P40925-3;P40925-2	P40925;P40925-3;P40925-2			-0.00614357	0.121347	-0.115204	0.292885	0.820375	0.469746	0.673929	1.00275	0.591833	0.59013	0.560961	0.428761	10	10	10	34.1	34.1	34.1	36.426	0	86.367	3236800000	123
MDH2	Malate dehydrogenase, mitochondrial	P40926;P40926-2	P40926;P40926-2			-0.0568034	0.171386	-0.114583	0.0327886	0.492818	0.193532	0.565877	0.318458	0.593408	0.123262	0.614106	0.222612	14	14	14	50.6	50.6	50.6	35.503	0	136.95	5468600000	207
HADHA	Trifunctional enzyme subunit alpha, mitochondrial;Long-chain enoyl-CoA hydratase;Long chain 3-hydroxyacyl-CoA dehydrogenase	P40939	P40939			-0.0630875	0.0502148	0.0128727	0.628317	0.417582	0.330742	0.650768	0.0115471	0.666723	0.45673	0.823851	0.51152	15	15	15	25.7	25.7	25.7	82.999	0	109.61	1269800000	111
EIF2S3;EIF2S3L	Eukaryotic translation initiation factor 2 subunit 3;Putative eukaryotic translation initiation factor 2 subunit 3-like protein	P41091;Q2VIR3;Q2VIR3-2	P41091;Q2VIR3;Q2VIR3-2			0.284878	-0.166407	-0.118471	-0.0521469	0.484657	-0.0245438	0.264843	0.579439	0.120968	0.117489	-0.217154	-0.123598	8	8	8	21.8	21.8	21.8	51.109	0	75.283	1316100000	95
GARS	Glycine--tRNA ligase	P41250	P41250			0.15503	-0.178893	0.0238635	0.25867	-0.567865	0.0643546	0.325019	-0.33813	-0.38144	-0.122485	-0.0728296	0.0578963	10	10	10	13.3	13.3	13.3	83.165	0	66.537	676090000	64
IARS	Isoleucine--tRNA ligase, cytoplasmic	P41252	P41252			-0.349669	-0.27953	0.629198	-0.129351	-0.842548	-0.52611	-0.411186	0.0206089	-0.0156345	-0.0119057	-0.0874443	-0.435108	11	11	11	9.2	9.2	9.2	144.5	0	65.285	513310000	42
TMPO	Lamina-associated polypeptide 2, isoform alpha;Thymopoietin;Thymopentin;Lamina-associated polypeptide 2, isoforms beta/gamma;Thymopoietin;Thymopentin	P42166;P42167-3	P42166;P42167-3			0.305647	0.0678787	-0.373526	NaN	0.18154	0.235374	0.149467	NaN	-0.217491	NaN	NaN	0.406326	7	7	3	12.2	12.2	4	75.491	0	46.313	362480000	22
STAT1	Signal transducer and activator of transcription 1-alpha/beta	P42224;P42224-2	P42224;P42224-2			NaN	0	NaN	0.707945	1.05498	0.702261	0.0799141	1.29616	NaN	1.20997	1.41184	0.171688	5	5	5	8.7	8.7	8.7	87.334	0	33.132	264390000	16
LRPPRC	Leucine-rich PPR motif-containing protein, mitochondrial	P42704	P42704			0.120498	0.173461	-0.293959	-0.204684	0.0681699	-0.0549781	0.28453	-0.078406	0.228261	0.158084	0.250135	-0.0502459	31	31	31	26.1	26.1	26.1	157.9	0	248.19	3745300000	255
ACAA2	3-ketoacyl-CoA thiolase, mitochondrial	P42765	P42765			0.0273635	-0.0925954	0.065232	0.425149	0.506493	0.489827	0.805476	-0.162858	1.02941	0.127257	0.433793	0.531937	8	8	8	28.2	28.2	28.2	41.924	0	65.721	814240000	62
RPL35	60S ribosomal protein L35	P42766	P42766			-0.0113557	-0.116254	0.12761	-0.563424	-1.14382	-0.785226	-0.811008	-1.9164	-0.946113	-1.13858	-0.561384	-1.15738	5	5	5	29.3	29.3	29.3	14.551	0	101.2	10435000000	85
CDKN2A	Cyclin-dependent kinase inhibitor 2A	P42771;P42771-2;P42771-4;P42771-3;P42772	P42771;P42771-2;P42771-4			0.133529	-0.100262	-0.0332667	0.100149	-0.453042	0.134195	-0.856867	-0.210467	-0.432208	-0.93818	-0.846381	NaN	4	4	4	34	34	34	16.532	0	27.968	560090000	18
PAFAH1B1	Platelet-activating factor acetylhydrolase IB subunit alpha	P43034;P43034-2	P43034			-0.0617415	0.229125	-0.167384	-0.190865	0.236566	0.237256	0.0691293	-1.04887	-0.384307	0.04223	0.410253	0.276395	4	4	4	12.7	12.7	12.7	46.637	0	27.844	413590000	45
MSH2	DNA mismatch repair protein Msh2	P43246;P43246-2	P43246;P43246-2			0.210877	-0.149675	-0.0612024	0.349784	0.737168	0.144826	0.57998	0.50013	0.293122	0.345982	0.0597045	-0.307897	15	15	15	17.6	17.6	17.6	104.74	0	99.704	1157000000	55
RANBP1	Ran-specific GTPase-activating protein	P43487-2;P43487	P43487-2;P43487			-0.207106	0.0743904	0.132715	0.168127	-0.0265427	0.024313	0.277386	0.139284	0.249578	0.333694	0.432396	-0.153517	5	5	5	38	38	38	23.239	0	49.891	1863600000	77
PSMC4	26S protease regulatory subunit 6B	P43686-2;P43686	P43686-2;P43686			0.0247205	-0.146264	0.121543	-0.398207	-0.0397708	0.285838	-0.441514	-0.683383	-0.249379	-0.699271	-0.580613	-0.179005	8	8	8	23.3	23.3	23.3	43.507	0	53.247	702830000	71
VDAC2	Voltage-dependent anion-selective channel protein 2	P45880-2;P45880;P45880-1	P45880-2;P45880;P45880-1			-0.219035	0.0946973	0.124338	1.22146	1.19215	1.00997	1.60139	1.67586	1.88089	1.36523	1.62893	1.66985	13	13	13	58	58	58	30.412	0	200.56	12295000000	144
USP5	Ubiquitin carboxyl-terminal hydrolase 5	P45974-2;P45974	P45974-2;P45974	+		0.1084	0.170107	-0.278507	0.235756	0.275303	0.093811	-0.0765266	0.582123	0.436333	0.162117	0.283049	-0.0018425	11	11	11	20.5	20.5	20.5	93.307	0	78.725	849220000	88
RANGAP1	Ran GTPase-activating protein 1	P46060	P46060			-0.0506026	0.0670656	-0.016463	-0.0851065	-0.245167	-0.248566	-0.312522	-0.744298	-0.816342	-0.843398	-0.446143	-0.70851	10	10	10	20.4	20.4	20.4	63.541	0	86.037	1210700000	109
RPL27A	60S ribosomal protein L27a	P46776	P46776			0.10124	0.00787099	-0.109111	-0.166281	-0.497819	-0.470219	-0.0253321	0.213689	-0.342225	0.130618	-0.0409152	-0.585589	5	5	5	31.1	31.1	31.1	16.561	0	58.8	9491900000	64
RPL5	60S ribosomal protein L5	P46777	P46777			-0.0672576	0.0326818	0.0345758	-0.0932738	-0.142441	0.055446	0.0609086	-0.238986	-0.377991	0.281257	-0.243262	-0.174407	8	8	8	25.6	25.6	25.6	34.362	0	57.774	1534600000	80
RPL21	60S ribosomal protein L21	P46778	P46778			0.1359	0.0201626	-0.156063	-0.221531	-0.370119	-0.843596	0.183451	-0.379032	-0.587637	0.212452	-0.179859	-0.404449	6	6	6	38.1	38.1	38.1	18.565	0	42.549	2862400000	74
RPL28	60S ribosomal protein L28	P46779;P46779-2;P46779-3;P46779-4;P46779-5	P46779;P46779-2;P46779-3;P46779-4;P46779-5			0.454995	-0.247267	-0.207728	-0.805072	-0.939189	-1.03335	-0.922623	-0.914796	-1.53926	-0.503859	-1.16537	-0.670392	12	12	12	55.5	55.5	55.5	15.747	0	114.13	17734000000	200
RPS9	40S ribosomal protein S9	P46781	P46781			-0.0488981	0.00763957	0.0412585	-0.201064	-0.674417	-0.344617	-0.355966	-0.734517	0.10209	-0.204091	-0.40723	-0.692468	15	15	15	50	50	50	22.591	0	121.32	28490000000	275
RPS5	40S ribosomal protein S5;40S ribosomal protein S5, N-terminally processed	P46782	P46782			-0.0126705	-0.305124	0.317795	-0.0781898	-0.414051	-0.0679245	-0.796	0.866249	0.489441	0.214888	0.26642	0.0248508	7	7	7	35.8	35.8	35.8	22.876	0	56.295	1731300000	58
IQGAP1	Ras GTPase-activating-like protein IQGAP1	P46940;Q86VI3;Q13576-3;Q13576-2;Q13576	P46940			0.0695222	-0.00380961	-0.0657126	-0.0813414	-0.216958	-0.215172	0.0366968	0.246805	0.184738	0.331764	0.119644	-0.00612322	28	28	28	19.2	19.2	19.2	189.25	0	224.56	3126100000	258
STT3A	Dolichyl-diphosphooligosaccharide--protein glycosyltransferase subunit STT3A	P46977;P46977-2	P46977;P46977-2			-0.211356	-0.171828	0.383184	0.683811	0.591123	0.88387	0.463012	0.314464	0.921155	0.875823	0.392555	0.41147	6	6	6	8.2	8.2	8.2	80.529	0	52.868	664860000	48
CAPZB	F-actin-capping protein subunit beta	P47756-2;P47756	P47756-2;P47756			-0.0452957	-0.0374928	0.0827885	0.288618	0.0860519	0.156321	0.332148	-0.29764	0.22353	0.210184	0.359694	0.347368	9	9	9	32.4	32.4	32.4	30.628	0	58.544	1672900000	106
QARS	Glutamine--tRNA ligase	P47897-2;P47897	P47897-2;P47897			-0.0921669	0.134932	-0.0427647	-0.0342026	-0.173697	-0.211178	-0.30616	-0.500086	0.27389	0.225163	0.100891	-0.447035	18	18	18	27.6	27.6	27.6	86.578	0	131.85	1221700000	111
RPL29	60S ribosomal protein L29	P47914	P47914			-0.0860799	-0.354896	0.440976	-2.17965	-1.22952	-1.6838	-1.33842	-4.53003	-1.07745	-1.63887	-1.97627	-0.931821	5	5	5	23.3	23.3	23.3	17.752	0	31.945	3835600000	62
ATP5O	ATP synthase subunit O, mitochondrial	P48047	P48047			-0.257818	-0.309134	0.566952	0.17453	-0.429251	-0.150412	-0.790178	-0.248896	0.0983372	-0.057106	-0.299873	-0.399387	7	7	7	39.4	39.4	39.4	23.277	0	73.839	2514900000	93
PREP	Prolyl endopeptidase	P48147	P48147			0.0526168	0.275347	-0.327964	0.497052	0.809365	0.93838	0.64668	1.08597	1.68283	1.27095	1.17399	1.06282	10	10	10	19.4	19.4	19.4	80.699	0	82.011	772570000	39
ARCN1	Coatomer subunit delta	P48444;P48444-2	P48444;P48444-2			-0.070851	-0.24965	0.320501	0.178249	0.125181	0.14076	0.0447343	0.482927	0.845926	0.44403	0.201791	-0.136588	9	9	9	19	19	19	57.21	0	70.546	554590000	79
PSMD8	26S proteasome non-ATPase regulatory subunit 8	P48556	P48556			0.0493387	-0.116877	0.0675386	0.138191	0.26349	-0.282885	0.059562	0.0359796	-0.219529	NaN	0.1709	-0.231665	6	6	6	16.6	16.6	16.6	39.611	0	38.262	453100000	36
CCT5	T-complex protein 1 subunit epsilon	P48643;P48643-2	P48643;P48643-2			-0.108613	0.160193	-0.0515798	0.588643	0.377797	0.698012	0.652667	0.453545	0.838767	0.47243	0.307826	0.46482	19	19	19	37.9	37.9	37.9	59.67	0	174.82	4045300000	195
PITPNB	Phosphatidylinositol transfer protein beta isoform	P48739;P48739-2;P48739-3	P48739;P48739-2;P48739-3			0.460197	-0.285121	-0.175076	-0.092879	0.163829	-0.458811	0.315353	NaN	-0.873522	NaN	0.118621	-0.0835501	4	4	4	16.6	16.6	16.6	31.54	0	26.685	234540000	21
ALDH9A1	4-trimethylaminobutyraldehyde dehydrogenase	P49189;P49189-2	P49189;P49189-2		x	-0.233482	0.290251	-0.0567684	6.53485	6.85251	6.69452	7.2446	6.90876	6.64648	7.40355	8.03842	7.73275	25	25	25	50.2	50.2	50.2	53.801	0	323.31	60626000000	422
RPL34	60S ribosomal protein L34	P49207	P49207			0.457609	0.108157	-0.565766	-0.627835	-0.635863	-0.68134	-0.31536	-1.5062	-1.16576	-0.376797	-0.173197	-0.370858	7	7	7	37.6	37.6	37.6	13.293	0	51.816	8120800000	102
NASP	Nuclear autoantigenic sperm protein	P49321;P49321-3;P49321-4;P49321-2	P49321;P49321-3;P49321-4;P49321-2			0.234001	0.126245	-0.360245	-0.680655	-0.550093	-0.398577	-0.575185	-1.20827	-0.641898	-0.190884	-0.121606	-0.413954	14	14	14	28.6	28.6	28.6	85.237	0	127.51	2364800000	146
FASN	Fatty acid synthase;[Acyl-carrier-protein] S-acetyltransferase;[Acyl-carrier-protein] S-malonyltransferase;3-oxoacyl-[acyl-carrier-protein] synthase;3-oxoacyl-[acyl-carrier-protein] reductase;3-hydroxyacyl-[acyl-carrier-protein] dehydratase;Enoyl-[acyl-carrier-protein] reductase;Oleoyl-[acyl-carrier-protein] hydrolase	P49327	P49327			-0.00769742	-0.00501188	0.0127093	0.465275	0.353593	0.376923	0.79317	0.452445	0.785771	0.524264	0.53085	0.434348	68	68	68	34.4	34.4	34.4	273.42	0	323.31	29693000000	971
CCT3	T-complex protein 1 subunit gamma	P49368;P49368-2	P49368;P49368-2			-0.119476	0.0694523	0.050024	0.24733	0.0588875	0.408136	0.249992	0.711336	0.303833	0.443932	0.457653	0.343319	23	23	23	45.1	45.1	45.1	60.533	0	235.27	7950300000	271
TUFM	Elongation factor Tu, mitochondrial	P49411	P49411			0.0429732	0.0014197	-0.0443929	0.400906	0.520087	0.317032	0.812613	0.884743	0.696992	0.491381	0.413829	0.286301	15	15	15	38.9	38.9	38.9	49.541	0	146.64	3444100000	195
ALDH7A1	Alpha-aminoadipic semialdehyde dehydrogenase	P49419-2;P49419;P49419-4	P49419-2;P49419;P49419-4		x	-0.0377579	-0.00401688	0.0417747	0.500153	0.151356	0.0809803	0.596722	-0.0731182	-0.193274	-0.0674591	0.562651	0.276154	11	11	11	26	26	26	55.366	0	71.55	958190000	37
AARS	Alanine--tRNA ligase, cytoplasmic	P49588;P49588-2	P49588;P49588-2			0.124944	-0.268948	0.144004	-0.0678374	0.0021623	-0.261779	-0.579049	-0.622779	-0.709826	-0.384394	0.405694	0.236549	12	12	12	13.7	13.7	13.7	106.81	0	82.945	928270000	86
SARS	Serine--tRNA ligase, cytoplasmic	P49591	P49591			0.280074	-0.205662	-0.074412	0.0662835	0.978826	-0.0423552	0.543914	1.14861	0.473264	0.520946	0.278423	0.104476	4	4	4	12.3	12.3	12.3	58.777	0	27.35	333480000	29
PSMB2	Proteasome subunit beta type-2	P49721	P49721			-0.192853	-0.146228	0.33908	0.285386	0.688981	-0.26664	NaN	0.484624	-0.0227782	0.165519	-0.160369	-0.0971724	4	4	4	20.9	20.9	20.9	22.836	0	27.189	426910000	38
MCM2	DNA replication licensing factor MCM2	P49736	P49736			-0.148657	0.244087	-0.0954291	0.260091	0.14524	0.106006	-0.091273	-0.458699	0.122302	-0.099261	0.0404008	0.247018	8	8	8	11.6	11.6	11.6	101.89	0	66.963	842540000	42
HINT1	Histidine triad nucleotide-binding protein 1	P49773	P49773			-0.0640405	0.0182749	0.0457656	0.335688	0.45735	0.733473	0.131772	NaN	-0.233396	-0.101379	NaN	0.417676	4	4	4	35.7	35.7	35.7	13.802	0	22.673	720840000	22
GMPS	GMP synthase [glutamine-hydrolyzing]	P49915;P49915-2	P49915;P49915-2			-0.0705783	-0.173047	0.243625	0.422195	0.273399	0.458793	0.93567	0.960986	0.935926	0.648969	0.673097	0.290733	9	9	9	14.4	14.4	14.4	76.715	0	63.681	666800000	64
IDH3A	Isocitrate dehydrogenase [NAD] subunit alpha, mitochondrial	P50213;P50213-2	P50213;P50213-2			0.30736	-0.0591749	-0.248185	0.421881	-0.121446	-0.0683797	0.260615	0.17553	-0.555976	0.329499	0.286711	0.737694	6	6	6	16.1	16.1	16.1	39.591	0	34.644	350960000	21
GDI2	Rab GDP dissociation inhibitor beta	P50395;P50395-2	P50395;P50395-2			0.0484695	-0.0572052	0.00873566	0.531473	0.507942	0.587366	0.9007	1.05256	0.877203	0.981646	0.818256	0.51054	19	19	15	46.3	46.3	38.2	50.663	0	184.04	4563000000	225
SERPINH1	Serpin H1	P50454	P50454			0.155703	0.132001	-0.287704	0.234313	0.544917	0.489823	0.780764	0.367095	0.97279	0.488536	0.739573	0.0765616	9	9	9	34.2	34.2	34.2	46.44	0	104.92	1705200000	95
ST13;ST13P5;ST13P4	Hsc70-interacting protein;Putative protein FAM10A5;Putative protein FAM10A4	P50502;Q8NFI4;Q8IZP2	P50502;Q8NFI4;Q8IZP2			0.269395	-0.0680116	-0.201383	-0.116287	0.050738	-0.0782827	-0.107152	-1.00944	0.0675303	-0.130498	0.443926	-0.324169	7	7	7	19.5	19.5	19.5	41.331	0	54.425	2193200000	97
RPL14	60S ribosomal protein L14	P50914	P50914			0.0453161	-0.043925	-0.00139109	-0.592307	-0.32157	-0.675971	-0.302251	-1.5059	-0.122985	-0.360139	-0.632741	-0.825961	3	3	3	16.3	16.3	16.3	23.432	0	48.257	1823000000	84
CCT8	T-complex protein 1 subunit theta	P50990;P50990-2;P50990-3	P50990;P50990-2;P50990-3			0.00936699	0.0729408	-0.0823078	0.0140343	0.196468	0.0345192	0.118185	-0.147768	0.404541	0.103249	0.260717	-0.0260906	26	26	26	50.5	50.5	50.5	59.62	0	260.19	10956000000	401
CCT4	T-complex protein 1 subunit delta	P50991;P50991-2	P50991;P50991-2			-0.0836525	0.00677681	0.0768757	0.0764942	0.264952	0.0834751	0.254026	-0.0553589	0.272524	0.508684	0.268297	0.446011	17	17	17	39	39	39	57.924	0	161.53	6458200000	212
RAB5C	Ras-related protein Rab-5C	P51148;P51148-2;P20339-2;P20339	P51148;P51148-2			0.261921	-0.0742359	-0.187685	0.0261745	0.0727444	-0.146776	-0.170807	0.642563	0.894516	0.224012	0.581367	-0.0448551	6	6	4	34.3	34.3	24.1	23.482	0	49.642	857420000	52
GALK1	Galactokinase	P51570;P51570-2	P51570;P51570-2			NaN	NaN	0	0.205591	0.202097	0.23568	0.295074	0.45244	0.536188	0.166857	0.206537	0.206154	4	4	4	10.5	10.5	10.5	42.272	0	24.898	163290000	6
HCFC1	Host cell factor 1;HCF N-terminal chain 1;HCF N-terminal chain 2;HCF N-terminal chain 3;HCF N-terminal chain 4;HCF N-terminal chain 5;HCF N-terminal chain 6;HCF C-terminal chain 1;HCF C-terminal chain 2;HCF C-terminal chain 3;HCF C-terminal chain 4;HCF C-terminal chain 5;HCF C-terminal chain 6	P51610-2;P51610;P51610-4;P51610-3;Q9Y5Z7	P51610-2;P51610;P51610-4;P51610-3			0.120008	0.093029	-0.213037	-0.248758	-0.806013	-0.22674	-0.834721	-0.399611	NaN	0.290747	NaN	0.00489807	5	5	5	2.6	2.6	2.6	201.85	0	30.732	130280000	21
ALDH3A2	Fatty aldehyde dehydrogenase	P51648;P51648-2;P48448;P43353-2;P30838;P43353	P51648;P51648-2		x	-0.472649	0.0755514	0.397098	2.97513	3.009	2.96865	3.27508	2.43347	2.72738	1.9685	2.56726	2.36301	8	8	8	18.1	18.1	18.1	54.847	0	67.756	1480200000	97
ALDH5A1	Succinate-semialdehyde dehydrogenase, mitochondrial	P51649;P51649-2	P51649;P51649-2		x	-0.064113	0.112521	-0.0484079	0.207398	-0.235448	-0.0205434	-0.0382646	NaN	0.0471789	0.0081412	NaN	-0.137763	2	2	2	3.9	3.9	3.9	57.214	0	14.112	128660000	11
HSD17B4	Peroxisomal multifunctional enzyme type 2;(3R)-hydroxyacyl-CoA dehydrogenase;Enoyl-CoA hydratase 2	P51659;P51659-3;P51659-2	P51659;P51659-3;P51659-2			-0.136594	0.526448	-0.389854	0.896079	0.593804	0.19319	0.243807	1.06113	0.13999	0.306805	0.0992171	0.426167	8	8	8	14.9	14.9	14.9	79.685	0	58.514	538730000	59
PSMD7	26S proteasome non-ATPase regulatory subunit 7	P51665	P51665	+		-1.24186	NaN	1.24186	-0.373368	-0.593503	-1.15384	-1.02469	-1.42661	NaN	NaN	0.413087	-0.342677	3	3	3	9.9	9.9	9.9	37.025	0	24.119	179340000	16
HNRNPA3	Heterogeneous nuclear ribonucleoprotein A3	P51991-2;P51991	P51991-2;P51991			0.293458	0.0640132	-0.357471	-0.15735	-0.000705083	-0.163362	NaN	0.0194232	0.283475	-0.119558	-0.337509	0.320128	5	5	5	17.7	17.7	17.7	37.029	0	34.233	426630000	19
PGD	6-phosphogluconate dehydrogenase, decarboxylating	P52209-2;P52209	P52209-2;P52209			-0.0616385	-0.100247	0.161886	0.669366	0.511731	0.291553	0.632135	0.85172	1.00594	0.579641	0.937175	0.453239	12	12	12	31.7	31.7	31.7	51.872	0	90.234	2861500000	127
HNRNPM	Heterogeneous nuclear ribonucleoprotein M	P52272-2;P52272	P52272-2;P52272			0.0430234	-0.0588347	0.0158113	0.245908	0.182063	0.222984	0.295453	-0.0488459	0.319427	0.216474	0.292243	0.0262998	24	24	24	41.4	41.4	41.4	73.62	0	290.83	6031700000	296
KPNA2	Importin subunit alpha-1	P52292	P52292			-0.0644855	-0.0681362	0.132622	-0.299923	-0.302269	-0.487396	-0.0727177	-0.234716	-0.0611057	-0.688999	-0.327522	-0.664785	11	11	11	26.5	26.5	26.5	57.861	0	109.88	1858700000	126
ARHGDIA	Rho GDP-dissociation inhibitor 1	P52565;P52565-2	P52565;P52565-2			0.105766	0.391687	-0.497452	-0.260619	0.1524	0.085008	0.53835	-0.40475	0.319221	-0.0891081	0.191491	0.360887	6	6	6	26	26	26	23.207	0	46.766	1041700000	55
HNRNPF	Heterogeneous nuclear ribonucleoprotein F;Heterogeneous nuclear ribonucleoprotein F, N-terminally processed	P52597	P52597			-0.101265	0.0904694	0.0107956	0.0709362	-0.0614815	0.215502	-0.0590897	0.900476	0.811609	0.695932	-0.049181	0.109575	7	7	5	21.7	21.7	15.2	45.671	0	126.37	1668700000	82
MSH6	DNA mismatch repair protein Msh6	P52701-3;P52701;P52701-4;P52701-2	P52701-3;P52701;P52701-4;P52701-2			-0.0622911	NaN	0.0622911	0.16463	0.173009	0.242806	NaN	0.38214	NaN	0.350144	-0.0215406	0.0163279	6	6	6	5	5	5	137.96	0	35.838	262000000	9
THOP1	Thimet oligopeptidase	P52888;P52888-2	P52888;P52888-2			-0.030091	0.0802854	-0.0501944	0.875715	0.326158	0.363273	0.639453	NaN	0.227624	NaN	NaN	NaN	4	4	4	7.5	7.5	7.5	78.839	0	25.739	257900000	10
CAPZA1	F-actin-capping protein subunit alpha-1	P52907	P52907			0.0642033	-0.0123749	-0.0518284	-0.411234	0.234451	0.0579681	0.774952	-0.255255	-0.0988655	-0.0553417	0.587166	-0.236866	5	5	4	25.9	25.9	22.4	32.922	0	45.341	450010000	26
BLVRA	Biliverdin reductase A	P53004	P53004			0.131772	-0.132562	0.000790278	0.442801	0.239695	0.530009	0.354491	NaN	0.014136	NaN	NaN	0.37637	4	4	4	13.9	13.9	13.9	33.428	0	35.315	256640000	35
PPP5C	Serine/threonine-protein phosphatase 5	P53041	P53041			-0.257959	0.149739	0.10822	0.030934	0.413119	0.185651	-0.116094	NaN	1.11871	0.869528	0.643649	0.785454	6	6	6	11.8	11.8	11.8	56.878	0	35.914	349720000	31
ACLY	ATP-citrate synthase	P53396-2;P53396;P53396-3	P53396-2;P53396;P53396-3			-0.012071	0.0611006	-0.0490297	0.299842	0.376908	0.204695	0.584428	0.44509	0.477126	0.652024	0.730813	0.201171	32	32	32	36	36	36	119.77	0	323.31	7269600000	381
COPB1	Coatomer subunit beta	P53618	P53618			0.10002	0.100163	-0.200183	0.351214	0.193194	-0.147861	0.121188	0.00595538	0.342065	-0.611619	0.30746	-0.272893	11	11	11	16.7	16.7	16.7	107.14	0	82.153	793980000	72
COPA	Coatomer subunit alpha;Xenin;Proxenin	P53621;P53621-2	P53621;P53621-2			0.076458	-0.0611248	-0.0153332	0.0110149	0.0828819	-0.278196	0.0399151	0.262674	0.0310421	0.100903	0.476154	0.161737	15	15	15	14.6	14.6	14.6	138.34	0	114.72	1677400000	95
RARS	Arginine--tRNA ligase, cytoplasmic	P54136;P54136-2	P54136;P54136-2			-0.111208	0.190928	-0.0797195	-0.310053	0.387745	-0.0242863	0.257534	0.102888	0.338863	0.0886383	0.0807724	-0.131779	13	13	13	22.9	22.9	22.9	75.378	0	103.04	978740000	86
YARS	Tyrosine--tRNA ligase, cytoplasmic;Tyrosine--tRNA ligase, cytoplasmic, N-terminally processed	P54577	P54577			0.2091	-0.036267	-0.172833	0.309415	0.419277	0.107509	0.127076	0.0268911	0.121929	-0.442942	0.334226	0.462474	10	10	10	20.5	20.5	20.5	59.143	0	68.548	609060000	58
USP14	Ubiquitin carboxyl-terminal hydrolase 14	P54578-2;P54578-3;P54578	P54578-2;P54578-3;P54578	+		-0.14109	-0.381608	0.522698	0.565196	0.179795	0.611174	-0.25316	-0.144203	-0.261541	0.124869	0.118214	0.164509	7	7	7	19.4	19.4	19.4	52.385	0	56.469	637920000	50
RAD23B	UV excision repair protein RAD23 homolog B	P54727;P54725-2;P54725-3;P54725;P54727-2	P54727			NaN	0	NaN	-0.779667	-0.239252	-0.879614	-0.0152435	-0.883804	-0.0505104	NaN	-0.487629	-0.0636997	5	5	5	15.9	15.9	15.9	43.171	0	34.411	302810000	21
AK2	Adenylate kinase 2, mitochondrial;Adenylate kinase 2, mitochondrial, N-terminally processed	P54819-3;P54819-5;P54819-2;P54819;P54819-4;P54819-6	P54819-3;P54819-5;P54819-2;P54819;P54819-4;P54819-6			-0.166269	0.0616099	0.104659	-0.492206	-0.328863	-1.39249	-0.821153	-0.489599	-1.10793	-0.758701	-0.149865	-0.360595	4	4	4	23.8	23.8	23.8	22.265	0	25.917	183940000	30
ALDH18A1	Delta-1-pyrroline-5-carboxylate synthase;Glutamate 5-kinase;Gamma-glutamyl phosphate reductase	P54886-2;P54886	P54886-2;P54886		x	-0.0900745	-0.159245	0.249319	0.451302	0.326429	0.229366	0.413059	-0.134783	0.735172	0.10288	0.341312	0.101271	15	15	15	20.7	20.7	20.7	87.088	0	122.04	1305500000	127
PSMD4	26S proteasome non-ATPase regulatory subunit 4	P55036;P55036-2;A2A3N6	P55036;P55036-2			NaN	NaN	0	0.408474	0.710161	0.472811	0.694586	NaN	0.454809	-0.0703506	NaN	0.137854	4	4	4	13.5	13.5	13.5	40.736	0	30.594	261730000	16
CSE1L	Exportin-2	P55060-3;P55060;P55060-4;P55060-2	P55060-3;P55060;P55060-4			0.0978222	0.07761	-0.175432	0.00742149	0.0930996	-0.0240402	0.316689	0.26532	0.367464	0.24843	0.361979	-0.0123615	23	23	23	24.1	24.1	24.1	107.78	0	275.14	5747600000	306
VCP	Transitional endoplasmic reticulum ATPase	P55072	P55072			-0.00960859	-0.0777753	0.0873839	0.328948	0.23808	0.232089	0.62943	0.696055	0.982379	0.680121	0.733882	0.359427	29	29	29	40.9	40.9	40.9	89.321	0	323.31	12770000000	377
NAP1L1	Nucleosome assembly protein 1-like 1	P55209-2;P55209;P55209-3	P55209-2;P55209;P55209-3			0.209426	0.0771192	-0.286545	0.217159	0.78658	0.0532964	0.105237	0.644517	0.632982	0.0576261	0.53559	0.345193	4	4	3	10.9	10.9	8.2	42.761	0	63.258	1482100000	39
NPEPPS	Puromycin-sensitive aminopeptidase	P55786;P55786-2;A6NEC2;A6NEC2-3;A6NEC2-2	P55786;P55786-2			0.134172	-0.00836563	-0.125807	0.466478	0.363316	0.261999	0.597628	0.591488	0.594913	0.71701	0.527018	0.184532	21	21	21	25.7	25.7	25.7	103.28	0	151.64	34099000000	235
EIF3B	Eukaryotic translation initiation factor 3 subunit B	P55884;P55884-2	P55884;P55884-2			0.161946	-0.315618	0.153672	0.334063	0.580533	-0.208534	0.581164	0.0801322	0.690379	0.222914	0.230841	0.0208575	12	12	12	17.8	17.8	17.8	92.48	0	91.47	1025500000	84
ATP5J2	ATP synthase subunit f, mitochondrial	P56134-4;P56134-3;P56134-2;P56134	P56134-4;P56134-3;P56134-2;P56134			0.148206	0.000201543	-0.148408	1.00141	0.675641	0.0909437	-0.137145	1.11563	1.19553	0.966607	1.34864	0.0395273	2	2	2	49	49	49	5.7407	0	15.267	210460000	33
MARS	Methionine--tRNA ligase, cytoplasmic	P56192;P56192-2	P56192;P56192-2			-0.0487397	-0.0320733	0.0808131	0.0605742	0.279359	0.27345	-0.0724424	0.267518	0.397292	-0.360957	-0.289081	0.00202243	9	9	9	12.1	12.1	12.1	101.11	0	62.368	571010000	45
CTBP2;CTBP1	C-terminal-binding protein 2;C-terminal-binding protein 1	P56545;P56545-3;P56545-2;Q13363-2;Q13363	P56545;P56545-3;P56545-2;Q13363-2;Q13363			-0.128139	0.128139	NaN	0.551855	0.205975	0.422125	0.310837	0.589256	0.667904	NaN	0.588558	0.300203	4	4	4	10.6	10.6	10.6	48.944	0	23.325	200140000	19
TMEM33	Transmembrane protein 33	P57088	P57088			-0.532485	-0.413511	0.945996	0.60027	0.467276	0.531422	-0.376911	-0.166402	0.994496	0.422234	0.490916	0.465056	3	3	3	12.6	12.6	12.6	27.978	0	32.446	314510000	31
EPPK1;PLEC	Epiplakin;Plectin	P58107;Q15149-7;Q15149-8;Q15149-9;Q15149-5;Q15149-4;Q15149-6;Q15149-3;Q15149-2;Q15149	P58107;Q15149-7;Q15149-8;Q15149-9;Q15149-5;Q15149-4;Q15149-6;Q15149-3;Q15149-2;Q15149			0.265237	0.223667	-0.488904	-0.388909	-0.535729	-0.798941	NaN	-0.734244	NaN	-0.345301	NaN	NaN	4	4	4	5.9	5.9	5.9	555.65	0	25.818	225460000	11
TPI1	Triosephosphate isomerase	P60174-1;P60174;P60174-4	P60174-1;P60174;P60174-4			0.156559	-0.0497589	-0.1068	-0.0901241	-0.0160847	0.0442028	-0.0304165	0.0956554	0.209082	0.00871277	-0.150137	-0.0191422	14	14	14	66.7	66.7	66.7	26.669	0	290.25	15614000000	340
EIF3E	Eukaryotic translation initiation factor 3 subunit E	P60228	P60228			-0.532503	-0.352013	0.884516	0.212929	-0.366106	0.415409	-0.642315	-0.755644	0.0548553	0.235821	-0.389799	-0.10306	11	11	11	27.6	27.6	27.6	52.22	0	100.87	1784500000	142
SEC61B	Protein transport protein Sec61 subunit beta	P60468	P60468			-0.125539	-0.160459	0.285998	0.557437	-0.0875963	-0.0917581	-0.244321	NaN	-0.51914	-0.012441	NaN	0.20402	3	3	3	37.5	37.5	37.5	9.9743	0	24.183	270670000	31
MYL6	Myosin light polypeptide 6	P60660-2;P60660;P14649	P60660-2;P60660			0.249086	-0.00833893	-0.240747	0.282568	0.20039	0.19371	0.259588	-0.0619507	-0.014576	-0.481476	0.780251	0.0839252	5	5	5	31.1	31.1	31.1	16.961	0	81.787	1869300000	73
ACTB;ACTG1	Actin, cytoplasmic 1;Actin, cytoplasmic 1, N-terminally processed;Actin, cytoplasmic 2;Actin, cytoplasmic 2, N-terminally processed	P60709;P63261;Q6S8J3;P63267-2;A5A3E0;P0CG38;Q562R1;P0CG39	P60709;P63261			0.134453	-0.0895379	-0.0449155	0.00493304	0.0746237	0.037913	-0.0308011	0.246434	0.500878	0.123788	0.255284	-0.00326093	20	20	7	62.9	62.9	32	41.736	0	323.31	116410000000	879
EIF4A1	Eukaryotic initiation factor 4A-I	P60842;P60842-2	P60842;P60842-2			-0.000762939	-0.0493603	0.0501232	0.421448	0.444252	0.18712	0.622705	0.488543	0.503263	0.147308	0.390766	0.224653	23	23	12	55.2	55.2	29.8	46.153	0	312.39	21452000000	480
RPS20	40S ribosomal protein S20	P60866;P60866-2	P60866;P60866-2			-0.107913	-0.246236	0.354149	0.0848281	-0.470477	0.16017	0.280226	-0.660226	-0.583831	0.0933444	-0.53028	0.154563	3	3	3	22.7	22.7	22.7	13.373	0	29.865	2411200000	46
PSMA6	Proteasome subunit alpha type-6	P60900;P60900-2;P60900-3	P60900;P60900-2			-0.112841	0.0762933	0.036548	-0.029122	0.177377	0.163745	-0.0821158	-0.853406	-0.0501334	-0.315068	-0.317853	-0.207234	7	7	7	32.1	32.1	32.1	27.399	0	54.627	812630000	68
CDC42	Cell division control protein 42 homolog	P60953;P60953-1	P60953;P60953-1			-0.000417709	-0.00395012	0.00436783	1.64078	1.64156	1.85687	NaN	2.42208	1.72238	1.82721	0.934456	0.397583	4	4	4	25.7	25.7	25.7	21.258	0	29.301	991860000	30
ACTR3	Actin-related protein 3	P61158;Q9P1U1-2;Q9P1U1	P61158			0.253316	0.00144513	-0.254761	0.648528	0.381629	0.26123	0.669046	0.674533	0.859998	NaN	0.264575	0.354085	5	5	5	14.6	14.6	14.6	47.371	0	34.058	360270000	21
COPS2	COP9 signalosome complex subunit 2	P61201;P61201-2	P61201;P61201-2			0	NaN	NaN	0.529427	0.202045	-0.297377	NaN	0.223888	0.198914	0.0409222	NaN	0.165951	3	3	3	8.1	8.1	8.1	51.596	0	20.15	126220000	15
ARF1;ARF3	ADP-ribosylation factor 1;ADP-ribosylation factor 3	P84077;P61204;P61204-2	P84077;P61204;P61204-2			0.0850118	0.147313	-0.232325	0.658883	0.303195	0.44761	0.190524	0.579391	0.89441	0.954675	0.660648	0.477294	5	3	2	35.9	18.2	12.7	20.697	0	28.335	1182800000	56
ABCE1	ATP-binding cassette sub-family E member 1	P61221	P61221			0.0109787	-0.107782	0.0968037	0.505203	0.0745544	0.265999	0.271984	NaN	NaN	0.818781	-0.42359	0.4886	4	4	4	7	7	7	67.314	0	26.811	137240000	22
RPS3A	40S ribosomal protein S3a	P61247	P61247			-0.0591768	-0.0297597	0.0889365	-0.0706113	0.252244	0.259514	-0.0770391	-0.0853208	-0.625589	-0.17761	-0.152837	0.102654	13	13	13	48.1	48.1	48.1	29.945	0	92.193	2896600000	118
PSME3	Proteasome activator complex subunit 3	P61289;P61289-3;P61289-2	P61289;P61289-3;P61289-2			0.0755596	-0.0958481	0.0202885	0.374859	0.187187	-0.19203	0.457762	0.340891	0.559494	-0.122492	-0.136154	-0.0664635	5	5	5	21.7	21.7	21.7	29.506	0	47.902	425460000	23
RPL15	60S ribosomal protein L15	P61313;P61313-2	P61313			-0.0325896	0.0630544	-0.0304648	-0.468838	-0.486397	-0.765277	-0.79901	-0.815135	-0.674811	-0.00412051	-0.311055	-0.2263	14	14	14	50	50	50	24.146	0	179.64	13318000000	244
RHOA;RHOC	Transforming protein RhoA;Rho-related GTP-binding protein RhoC	P61586;P08134	P61586;P08134			-0.638508	0.132911	0.505597	0.426475	-0.00204531	1.23885	-0.282406	NaN	NaN	NaN	0.36075	1.06728	3	3	3	16.1	16.1	16.1	21.768	0	18.018	224560000	9
NUTF2	Nuclear transport factor 2	P61970	P61970			0.269815	0.0875753	-0.35739	0.828269	0.894796	0.573139	-0.0543486	NaN	0.331222	0.528709	0.418924	0.199754	3	3	3	24.4	24.4	24.4	14.478	0	18.145	273500000	27
HNRNPK	Heterogeneous nuclear ribonucleoprotein K	P61978-3;P61978;P61978-2	P61978-3;P61978;P61978-2			-0.189088	0.157614	0.0314738	-0.263749	-0.0535024	-0.0350622	0.05992	-0.0556348	-0.191432	0.447249	0.471505	0.241772	15	15	15	40.7	40.7	40.7	48.562	0	140.83	3201100000	176
YWHAG	14-3-3 protein gamma;14-3-3 protein gamma, N-terminally processed	P61981	P61981			0.0594667	0.0250982	-0.0845648	-0.147015	-0.134371	-0.222708	-0.740552	-1.22961	-0.0975558	0.113006	-0.760953	-0.296185	8	5	5	36.4	25.5	25.5	28.302	0	141.64	920080000	66
PSMC1	26S protease regulatory subunit 4	P62191-2;P62191	P62191-2;P62191			0.265949	-0.112158	-0.15379	0.237436	0.246185	0.00828107	0.54107	NaN	-0.727666	0.319011	0.357431	0.812377	5	5	5	14.7	14.7	14.7	41.167	0	45.622	542100000	34
PSMC5	26S protease regulatory subunit 8	P62195-2;P62195;Q8NB90-3;Q8NB90-2;Q8NB90	P62195-2;P62195			-0.141729	0.0880705	0.0536582	0.059365	0.135573	0.340663	-0.0880922	0.0969016	0.770718	0.674124	1.01354	0.0651671	9	9	9	29.1	29.1	29.1	44.784	0	66.513	1234300000	54
RPS8	40S ribosomal protein S8	P62241	P62241			0.076952	-0.0274849	-0.0494671	-0.470476	-0.366039	-0.620073	0.20162	-0.175694	0.13962	-0.447067	0.0302467	-0.495079	10	10	10	39.4	39.4	39.4	24.205	0	207.3	11200000000	179
RPS15A	40S ribosomal protein S15a	P62244	P62244			-0.179122	0.00456301	0.174559	0.595132	0.325276	0.564458	1.03596	0.673464	0.783057	-0.11548	0.569052	0.293467	5	5	5	46.2	46.2	46.2	14.839	0	44.326	2799300000	76
RPS16	40S ribosomal protein S16	P62249	P62249			0.027689	-0.0569878	0.0292988	0.319798	0.465406	0.709221	0.600832	0.93788	0.412653	0.229877	-0.159594	0.310751	10	10	10	54.1	54.1	54.1	16.445	0	102.89	4087100000	138
YWHAE	14-3-3 protein epsilon	P62258;P62258-2	P62258;P62258-2			0.113742	-0.195382	0.0816409	-0.3155	0.106562	-0.347724	0.130248	-0.220615	-0.179912	0.0116393	0.0381037	0.160485	16	16	14	66.7	66.7	59.6	29.174	0	316.09	23393000000	387
RPS14	40S ribosomal protein S14	P62263	P62263			-0.0980072	0.0284653	0.0695419	0.0174446	-0.384251	-0.199965	0.263802	0.0663776	-0.0777626	0.262295	0.335182	-0.404713	5	5	5	37.1	37.1	37.1	16.273	0	57.798	2757100000	89
RPS23	40S ribosomal protein S23	P62266	P62266			-0.134412	-0.210594	0.345006	-0.731691	-0.956538	-0.0714715	0.010121	-0.611986	-0.510278	0.106024	NaN	-0.372058	4	4	4	29.4	29.4	29.4	15.807	0	31.557	2522700000	75
RPS11	40S ribosomal protein S11	P62280	P62280			-0.103696	-0.147181	0.250877	-0.159691	-0.300013	-0.309104	-0.0318724	-1.23272	-0.480225	-0.00762812	-0.572413	0.0155538	7	7	7	44.3	44.3	44.3	18.431	0	52.378	2937500000	132
SNRPD2	Small nuclear ribonucleoprotein Sm D2	P62316;P62316-2	P62316;P62316-2			NaN	NaN	0	0.16568	0.0805492	-0.0969753	0.31395	NaN	0.390858	-0.151831	NaN	0.249023	4	4	4	28.8	28.8	28.8	13.527	0	24.439	407960000	18
PSMC6	26S protease regulatory subunit 10B	P62333	P62333			0.318738	-0.549014	0.230277	-0.179473	0.268464	-0.332767	0.192614	NaN	-0.436843	-0.628816	-0.104883	-0.0870584	6	6	6	18	18	18	44.172	0	43.276	373010000	57
RPL7A	60S ribosomal protein L7a	P62424	P62424			0.00821749	-0.166398	0.158181	-0.321937	-0.270871	-0.117145	0.248067	-0.455724	-0.0488752	-0.442722	0.149083	-0.257085	11	11	11	33.5	33.5	33.5	29.995	0	88.001	4384100000	205
ETF1	Eukaryotic peptide chain release factor subunit 1	P62495-2;P62495	P62495-2;P62495			0.0208956	-0.0523179	0.0314223	-0.397458	0.0667044	-0.0793661	-0.432296	-0.231124	-0.170787	NaN	-0.361877	-0.343601	8	8	8	23.5	23.5	23.5	45.462	0	56.008	626620000	30
RPS4X;RPS4Y2;RPS4Y1	40S ribosomal protein S4, X isoform;40S ribosomal protein S4, Y isoform 2;40S ribosomal protein S4, Y isoform 1	P62701;Q8TD47;P22090	P62701;Q8TD47;P22090			0.00538826	-0.027914	0.0225258	-0.257977	-0.188871	-0.417789	0.24251	-0.359869	-0.308962	-0.244017	-0.107203	-0.254591	14	14	14	46.4	46.4	46.4	29.597	0	140.64	7259800000	205
RPS6	40S ribosomal protein S6	P62753	P62753			-0.320838	0.488253	-0.167415	-0.279338	-0.182285	-0.684593	-0.593353	0.378535	0.237403	0.0336634	0.0378215	0.011397	7	7	7	27.7	27.7	27.7	28.68	0	146.14	8789500000	121
HIST1H4A	Histone H4	P62805	P62805			0.0439949	0.0980816	-0.142076	-0.851355	-0.252052	0.822775	-0.275873	-1.24037	-1.18838	-1.28448	-1.23778	-1.34102	6	6	6	57.3	57.3	57.3	11.367	0	50.452	1896500000	78
RAB1A	Ras-related protein Rab-1A	P62820;P62820-2;P62820-3;Q9H0U4;Q92928;Q92930;P61006-2;P59190-2;P59190	P62820;P62820-2			0.0139529	-0.0883516	0.0743987	0.382762	0.300915	0.423403	0.283229	1.21415	0.659152	0.95669	0.674658	0.619183	9	9	8	42.9	42.9	37.6	22.677	0	66.375	2709900000	68
RAN	GTP-binding nuclear protein Ran	P62826	P62826			-0.105611	0.106946	-0.00133451	0.188777	0.174864	0.668843	0.215926	0.194834	-0.0231851	0.318288	0.397658	0.388447	8	8	8	38.9	38.9	38.9	24.423	0	93.578	6946600000	123
RPL23	60S ribosomal protein L23	P62829	P62829			0.231759	0.0839513	-0.315711	0.754623	0.928977	0.0731309	1.17815	1.20358	0.557905	0.720304	1.05738	0.40093	3	3	3	22.9	22.9	22.9	14.865	0	19.758	1654300000	28
RPS25	40S ribosomal protein S25	P62851	P62851			0.107675	0.158685	-0.26636	-0.11249	0.424335	0.0386289	0.375898	-0.201255	0.0561441	-0.238125	0.469461	-0.286433	5	5	5	29.6	29.6	29.6	13.742	0	38.866	2038800000	63
RPS26;RPS26P11	40S ribosomal protein S26;Putative 40S ribosomal protein S26-like 1	P62854;Q5JNZ5	P62854;Q5JNZ5			0.0214183	0.305451	-0.326869	-0.464012	-0.463434	-0.568614	-0.368026	-0.131576	0.433674	0.14671	0.50508	-0.603483	2	2	2	20.9	20.9	20.9	13.015	0	14.006	2627700000	63
RPS28	40S ribosomal protein S28	P62857	P62857			NaN	0.00447083	-0.00447083	-0.211706	0.13221	-0.050499	NaN	0.0140266	0.359823	-0.26977	0.401207	0.709473	3	3	3	46.4	46.4	46.4	7.8409	0	19.228	453950000	23
FAU	40S ribosomal protein S30	P62861	P62861			-0.838858	0.683957	0.154901	-0.984309	0.0479501	-0.863627	-0.596097	-0.336013	-1.88993	-1.05141	-0.530245	-0.913613	2	2	2	18.6	18.6	18.6	6.6478	0	15.537	651930000	34
RPL30	60S ribosomal protein L30	P62888	P62888			0.0916888	-0.25028	0.158591	0.123921	0.464802	0.0686041	0.965293	0.370063	0.441664	1.52804	-0.11103	0.877993	4	4	4	39.1	39.1	39.1	12.784	0	27.326	327010000	27
RPL39P5;RPL39	Putative 60S ribosomal protein L39-like 5;60S ribosomal protein L39	Q59GN2;P62891	Q59GN2;P62891			0.114011	-0.271485	0.157474	-0.860797	-0.63408	-0.741625	-0.953557	NaN	-0.279772	-1.15246	-0.265834	-0.888737	3	3	3	23.5	23.5	23.5	6.3225	0	25.846	7688500000	55
RPL31	60S ribosomal protein L31	P62899;P62899-3;P62899-2	P62899;P62899-3;P62899-2			-0.0830224	0.494149	-0.411126	-1.30275	-0.556503	-1.03334	-0.556447	-3.38346	-1.98662	-1.50117	-0.817149	-1.18774	7	7	7	52	52	52	14.463	0	79.603	17285000000	143
RPL10A	60S ribosomal protein L10a	P62906	P62906			0.147891	-0.0915407	-0.0563501	0.482533	0.342089	0.425526	0.163436	0.63927	0.574258	0.224759	0.782763	0.208373	6	6	6	26.3	26.3	26.3	24.831	0	43.671	1509900000	86
RPL32	60S ribosomal protein L32	P62910	P62910			0.326239	-0.0806383	-0.245601	-0.981366	-0.531745	-0.70063	-0.611677	-1.29721	-1.17521	-0.751546	-0.0154432	-0.476652	13	13	13	60.7	60.7	60.7	15.86	0	151.52	26941000000	343
RPL11	60S ribosomal protein L11	P62913;P62913-2	P62913;P62913-2			-0.380092	0.393647	-0.0135549	0.726618	0.895411	0.533625	NaN	NaN	1.09784	-0.318794	-0.404508	0.812325	4	4	4	24.2	24.2	24.2	20.252	0	106.79	1912900000	53
RPL8	60S ribosomal protein L8	P62917	P62917			-0.170568	0.155638	0.0149307	-0.794504	-0.331299	-0.438095	-0.604492	-1.74558	-0.746107	-0.745173	-0.490791	-0.577036	6	6	6	22.2	22.2	22.2	28.024	0	51.415	2577000000	89
PPIA	Peptidyl-prolyl cis-trans isomerase A;Peptidyl-prolyl cis-trans isomerase A, N-terminally processed	P62937;P62937-2;P0DN26;A0A0B4J2A2;A0A075B767;A0A075B759;Q9Y536;F5H284;P0DN37	P62937;P62937-2			0.0836951	0.0519721	-0.135667	0.0863005	0.656621	0.608878	0.850186	0.866843	0.537551	0.174037	0.683772	0.327124	10	10	10	53.3	53.3	53.3	18.012	0	193.22	10110000000	155
FKBP1A	Peptidyl-prolyl cis-trans isomerase FKBP1A	P62942	P62942			-0.400694	0.127609	0.273085	0.589731	0.319685	0.362024	-0.11314	-0.409657	0.133066	NaN	-0.089119	0.25297	2	2	2	25	25	25	11.951	0	28.684	327270000	32
RAC1;RAC3;RAC2	Ras-related C3 botulinum toxin substrate 1;Ras-related C3 botulinum toxin substrate 3;Ras-related C3 botulinum toxin substrate 2	P63000;P63000-2;P60763;P15153	P63000;P63000-2;P60763;P15153			-0.066424	-0.07429	0.140714	0.324905	0.165773	0.0466779	0.584329	NaN	0.563947	0.820115	0.56326	0.301196	2	2	2	11.5	11.5	11.5	21.45	0	12.419	635840000	25
AP2B1	AP-2 complex subunit beta	P63010;P63010-2;P63010-3	P63010;P63010-2;P63010-3			0.0967821	-0.232701	0.135919	0.372516	0.0325216	-0.290753	0.647437	0.381524	-0.000237147	0.242023	0.22215	-0.235009	14	14	5	18.8	18.8	7.8	104.55	0	111.36	1500900000	113
GNAS	Guanine nucleotide-binding protein G(s) subunit alpha isoforms short;Guanine nucleotide-binding protein G(s) subunit alpha isoforms XLas	P63092-3;P63092-2;P63092;P63092-4;Q5JWF2-2;Q5JWF2	P63092-3;P63092-2;P63092;P63092-4;Q5JWF2-2;Q5JWF2			0.0632076	0.097086	-0.160294	0.740335	0.157911	0.722908	0.82933	0.802187	NaN	0.966156	1.00418	0.313446	2	2	1	5.3	5.3	2.4	44.179	0	14.586	635320000	20
YWHAZ	14-3-3 protein zeta/delta	P63104;P63104-2	P63104;P63104-2			0.297725	-0.147689	-0.150036	-0.516715	-0.455125	-0.603169	-0.040837	-0.891314	-0.932519	-0.300856	-0.110804	-0.275056	11	8	8	48.6	37.6	37.6	27.745	0	227.71	9852800000	178
PPP2R2A	Serine/threonine-protein phosphatase 2A 55 kDa regulatory subunit B alpha isoform	P63151;P63151-2;Q9Y2T4-3;Q9Y2T4-4;Q9Y2T4-2;Q9Y2T4	P63151;P63151-2			0.136718	-0.250399	0.113681	-0.10328	-0.365056	-0.121604	-0.177933	NaN	NaN	0.138524	NaN	NaN	4	4	4	10.1	10.1	10.1	51.691	0	30.323	254210000	6
EIF5A	Eukaryotic translation initiation factor 5A-1	P63241;P63241-2;Q9GZV4;Q6IS14	P63241;P63241-2			0.0342395	-0.178863	0.144623	-0.175653	0.749409	0.687369	0.154843	0.915116	0.82121	0.12126	-1.65312	0.247983	7	7	7	44.8	44.8	44.8	16.832	0	79.397	2076200000	59
GNB2L1	Guanine nucleotide-binding protein subunit beta-2-like 1;Guanine nucleotide-binding protein subunit beta-2-like 1, N-terminally processed	P63244	P63244			0.180126	0.0542768	-0.234402	0.206342	0.214046	0.394458	0.742776	0.886241	0.95112	0.326764	0.468271	0.290204	12	12	12	51.7	51.7	51.7	35.076	0	180.02	6184700000	167
YBX1	Nuclease-sensitive element-binding protein 1	P67809	P67809			-0.655271	0.953929	-0.298658	-1.5403	-1.26838	-1.36962	-1.99864	NaN	NaN	-1.04298	-1.18169	-0.740308	6	6	6	28.7	28.7	28.7	35.924	0	67.899	446670000	18
TPM4	Tropomyosin alpha-4 chain	P67936;P67936-2	P67936;P67936-2			-0.17089	0.527801	-0.356911	-0.417	-0.363301	-0.335366	-0.215571	-0.169406	-0.402205	-0.454707	0.26374	-0.39527	6	4	4	19	13.3	13.3	28.521	0	27.082	249630000	27
ACTA1;ACTC1;ACTG2;ACTA2	Actin, alpha skeletal muscle;Actin, alpha cardiac muscle 1;Actin, gamma-enteric smooth muscle;Actin, aortic smooth muscle	P68133;P68032;P63267;P62736	P68133;P68032;P63267;P62736			-0.0961927	0.0712115	0.0249812	-0.117696	2.09364	0.408459	-0.577007	0.0915515	2.49715	0.37007	2.10106	-0.407651	13	1	1	31.6	4.2	4.2	42.051	0	17.176	6201600000	45
UBE2L3	Ubiquitin-conjugating enzyme E2 L3	P68036-2;P68036;P68036-3;A0A1B0GUS4	P68036-2;P68036;P68036-3;A0A1B0GUS4			0.0612679	-0.0612679	NaN	-0.299896	0.134979	0.387749	-0.150019	0.388594	-0.428596	-0.0938759	NaN	-0.231571	4	4	4	45.1	45.1	45.1	14.121	0	50.594	442650000	29
EEF1A1;EEF1A1P5	Elongation factor 1-alpha 1;Putative elongation factor 1-alpha-like 3	P68104;Q5VTE0;P68104-2	P68104;Q5VTE0;P68104-2			0.089749	0.0336539	-0.123403	0.157714	0.537335	0.313977	0.166411	0.616597	0.2114	-0.0131734	0.123917	-0.204507	17	17	9	53	53	32.3	50.14	0	289.44	108440000000	456
TUBA1B;TUBA4A	Tubulin alpha-1B chain;Tubulin alpha-4A chain	P68363;P68363-2;P68366-2;P68366;Q9H853;A6NHL2-2;A6NHL2	P68363;P68363-2;P68366-2;P68366			-0.00109037	0.126816	-0.125726	0.511065	0.72556	0.378192	0.679702	0.952786	1.18305	0.471789	0.757855	0.422158	21	21	1	55.9	55.9	2.9	50.151	0	323.31	71937000000	425
TUBB4B	Tubulin beta-4B chain	P68371;Q3ZCM7	P68371			0.228742	-0.0655753	-0.163167	0.638795	0.697334	0.504651	0.787322	1.08984	0.856914	0.429069	0.517881	0.204826	21	21	1	65.2	65.2	2.7	49.83	0	323.31	41496000000	654
CCT2	T-complex protein 1 subunit beta	P78371;P78371-2	P78371;P78371-2			0.0342547	-0.0329526	-0.00130208	0.423155	0.541503	0.635329	0.803361	0.868127	0.746539	0.0796305	0.147767	0.376622	24	24	24	53.1	53.1	53.1	57.488	0	308.51	7924800000	319
GSTO1	Glutathione S-transferase omega-1	P78417;P78417-3;P78417-2	P78417;P78417-3;P78417-2			-0.303808	0.275463	0.0283451	0.351336	0.446484	0.364407	0.547865	0.341051	0.51265	0.460041	0.541595	-0.126682	11	11	11	42.3	42.3	42.3	27.566	0	107.81	2069700000	119
PRKDC	DNA-dependent protein kinase catalytic subunit	P78527;P78527-2	P78527;P78527-2			-0.0475769	0.0354309	0.012146	0.0527954	-0.168768	-0.152115	0.315655	0.378101	0.274525	0.589304	0.618633	0.214794	48	48	48	12.3	12.3	12.3	469.08	0	323.31	3608700000	323
DCD	Dermcidin;Survival-promoting peptide;DCD-1	P81605;P81605-2	P81605;P81605-2			-0.628572	1.35362	-0.72505	-2.16758	NaN	-1.88641	-1.24119	NaN	NaN	-2.08156	-1.18551	-1.3889	3	3	3	22.7	22.7	22.7	11.284	0	25.061	438060000	27
RPL24	60S ribosomal protein L24	P83731	P83731			-0.146928	0.431793	-0.284865	0.237645	0.349647	0.401084	0.922008	0.46251	0.91891	-0.0434672	0.321973	-0.33426	3	3	3	19.1	19.1	19.1	17.779	0	20.57	2255200000	43
RPL36A	60S ribosomal protein L36a	P83881	P83881			0.204472	0.156466	-0.360938	-0.886888	-0.893436	-0.81653	-0.686738	-1.26468	-1.78318	-1.90385	-1.20539	-0.665134	5	5	2	24.5	24.5	9.4	12.441	0	30.134	1745600000	51
RPL19	60S ribosomal protein L19	P84098	P84098			-0.00330226	0.00672086	-0.0034186	-0.172702	-0.473071	-0.811125	0.00189336	-0.0321871	-0.161172	-0.266303	0.365066	-0.760232	5	5	5	21.9	21.9	21.9	23.466	0	80.601	6153700000	75
SRSF3	Serine/arginine-rich splicing factor 3	P84103-2;P84103	P84103-2;P84103			-0.136695	-0.120104	0.256799	-0.126115	0.0815767	-0.0455901	-0.335045	0.130966	0.334977	0.066316	0.541507	0.197576	4	4	3	36.3	36.3	25	14.203	0	37.145	729370000	58
SLC25A3	Phosphate carrier protein, mitochondrial	Q00325-2;Q00325	Q00325-2;Q00325			-0.0342776	-0.30609	0.340368	0.496734	0.554361	0.16027	-0.018603	0.374854	0.380428	-0.0415103	0.839479	0.349927	7	7	7	20.8	20.8	20.8	39.958	0	55.526	1578700000	64
HDLBP	Vigilin	Q00341;Q00341-2	Q00341;Q00341-2			0.274649	-0.00994301	-0.264706	-0.59767	-0.433933	-0.704466	-0.323259	-0.0294437	-0.0675488	-0.336067	-0.152	-0.0289516	14	14	14	13.3	13.3	13.3	141.45	0	86.376	601970000	37
CLTC	Clathrin heavy chain 1	Q00610-2;Q00610;P53675-2;P53675	Q00610-2;Q00610			0.109512	0.0301666	-0.139679	0.324596	0.147219	0.126707	0.345373	0.839565	0.467417	0.403187	0.568521	0.236994	41	41	41	30.8	30.8	30.8	187.89	0	323.31	14934000000	608
FKBP3	Peptidyl-prolyl cis-trans isomerase FKBP3	Q00688	Q00688			-0.439504	0.226264	0.21324	-0.407386	-0.699771	-0.105304	0.16787	0.086146	-0.391952	0.305358	0.0659014	0.0250746	3	3	3	13.4	13.4	13.4	25.177	0	28.396	307430000	32
REEP5	Receptor expression-enhancing protein 5	Q00765	Q00765			NaN	0	NaN	0.69733	1.46142	0.779413	0.575962	0.341022	NaN	1.00064	NaN	1.20182	3	3	3	11.1	11.1	11.1	21.493	0	39.598	299040000	34
HNRNPU	Heterogeneous nuclear ribonucleoprotein U	Q00839;Q00839-2	Q00839;Q00839-2			-0.0437438	0.125367	-0.0816237	-0.0575892	-0.177638	-0.244284	0.316146	0.315397	-0.152589	0.0991624	0.236896	0.112455	16	16	16	22.1	22.1	22.1	90.583	0	168.66	4244400000	156
FABP5	Fatty acid-binding protein, epidermal	Q01469	Q01469			-0.0326214	0.400084	-0.367462	-0.0557995	-0.60593	-0.1959	0.262873	-1.55853	NaN	NaN	-0.177889	-0.241945	3	3	3	20	20	20	15.164	0	20.272	221930000	25
CAP1	Adenylyl cyclase-associated protein 1	Q01518-2;Q01518;P40123-3;P40123-2;P40123	Q01518-2;Q01518			0.0294228	-0.214926	0.185503	0.40427	-0.112585	0.033474	0.14485	0.438145	0.740488	0.577656	0.801859	0.24012	9	9	9	24.5	24.5	24.5	51.83	0	75.135	1864200000	85
HMGCS1	Hydroxymethylglutaryl-CoA synthase, cytoplasmic	Q01581;P54868-3;P54868-2;P54868	Q01581			0.055411	-0.0171312	-0.0382799	2.4408	2.25489	2.08476	2.16847	2.0928	2.16785	0.96221	1.38158	0.828358	19	19	19	46	46	46	57.293	0	318.97	16114000000	283
PFKP	ATP-dependent 6-phosphofructokinase, platelet type	Q01813;Q01813-2	Q01813;Q01813-2			-0.243809	0.308038	-0.0642287	0.742069	0.587753	0.573684	0.756509	0.796932	1.43142	0.824533	0.955552	0.288406	12	12	9	18.1	18.1	13.4	85.595	0	82.329	881170000	36
EWSR1	RNA-binding protein EWS	Q01844-2;Q01844-6;Q01844-3;Q01844;Q01844-5	Q01844-2;Q01844-6;Q01844-3;Q01844;Q01844-5			NaN	NaN	0	0.0362663	0.233122	0.730074	0.209585	-0.0896397	NaN	0.19268	NaN	0.696812	2	2	2	3.9	3.9	3.9	61.217	0	13.12	175690000	22
RPL18A	60S ribosomal protein L18a	Q02543	Q02543			0.0985355	-0.170992	0.0724564	-0.534243	-0.51206	-0.448765	-0.0452309	-0.264984	0.200932	-0.496695	0.463295	0.00778961	4	4	4	19.3	19.3	19.3	20.762	0	26.753	1502600000	63
FKBP4	Peptidyl-prolyl cis-trans isomerase FKBP4;Peptidyl-prolyl cis-trans isomerase FKBP4, N-terminally processed	Q02790	Q02790			0.183524	-0.116685	-0.0668399	0.0575994	0.288991	0.376375	0.321592	0.907996	0.258746	0.0294851	-0.0215632	0.146121	14	14	14	37	37	37	51.804	0	110.46	2037300000	118
RPL6	60S ribosomal protein L6	Q02878	Q02878			-0.161222	-0.0980047	0.259226	-0.734371	-0.905002	-0.993079	-1.08473	-1.22173	-1.51859	-0.340204	-1.0862	-0.683509	17	17	17	46.2	46.2	46.2	32.728	0	250.21	19949000000	280
SLC25A11	Mitochondrial 2-oxoglutarate/malate carrier protein	Q02978;Q02978-2	Q02978;Q02978-2			0.128373	0.0705687	-0.198942	0.0981528	0.364155	0.158528	0.184104	0.595286	0.479537	0.240832	0.0651747	0.141167	7	7	7	24.8	24.8	24.8	34.061	0	49.778	502600000	54
EIF4G1	Eukaryotic translation initiation factor 4 gamma 1	Q04637-6;Q04637-5;Q04637-4;Q04637-3;Q04637;Q04637-9	Q04637-6;Q04637-5;Q04637-4;Q04637-3;Q04637;Q04637-9			-0.00120799	0.132364	-0.131156	-0.16029	-0.127553	-0.320956	-0.00397936	-0.442403	-0.523019	-0.0445944	-0.110442	0.0612348	18	18	1	15.6	15.6	0.6	154.8	0	138.92	1808700000	183
TLE3;TLE2;TLE4;TLE1	Transducin-like enhancer protein 3;Transducin-like enhancer protein 2;Transducin-like enhancer protein 4;Transducin-like enhancer protein 1	Q04726-2;Q04726-7;Q04726-3;Q04726-6;Q04726-5;Q04726-4;Q04726;Q04725-2;Q04727-2;Q04725;Q04727-4;Q04724;Q04727;Q04727-3	Q04726-2;Q04726-7;Q04726-3;Q04726-6;Q04726-5;Q04726-4;Q04726;Q04725-2;Q04727-2;Q04725;Q04727-4;Q04724;Q04727;Q04727-3			-0.243484	0.0970726	0.146412	0.0485554	0.160242	-0.17	0.0172958	NaN	-0.304171	NaN	NaN	0.0938587	2	2	2	3.4	3.4	3.4	82.221	0	14.866	121040000	12
GLO1	Lactoylglutathione lyase	Q04760-2;Q04760	Q04760-2;Q04760			0.133617	0.0826817	-0.216299	-0.251492	0.28949	-0.276287	0.594345	0.215155	0.0146084	-0.132811	0.415239	-0.0820522	6	6	6	24.3	24.3	24.3	19.043	0	59.356	2060800000	96
YWHAH	14-3-3 protein eta	Q04917	Q04917			0.205156	-0.0554778	-0.149678	-0.388619	-0.163356	-0.0890414	-0.594794	-1.26704	-0.990477	-0.313321	-1.13161	-0.246894	9	7	7	36.2	28.9	28.9	28.218	0	76.522	789060000	68
SRSF11	Serine/arginine-rich splicing factor 11	Q05519-2;Q05519	Q05519-2;Q05519			-0.263955	0.2538	0.0101554	-0.734514	-0.0553525	-1.10797	-0.344989	-0.470332	0.502946	0.279673	0.454327	0.146393	5	5	5	15.1	15.1	15.1	53.413	0	80.109	1366000000	67
GFPT1	Glutamine--fructose-6-phosphate aminotransferase [isomerizing] 1	Q06210-2;Q06210;O94808	Q06210-2;Q06210			0.0126724	0.0482712	-0.0609436	-0.276894	-0.359735	-0.579189	-0.125765	-0.264099	-0.255812	-0.0789185	0.322905	0.00934982	15	15	15	25	25	25	76.758	0	127.55	1621300000	163
PSME1	Proteasome activator complex subunit 1	Q06323-3;Q06323;Q06323-2	Q06323-3;Q06323;Q06323-2			0.0305926	0.578599	-0.609191	-0.65389	0.062369	-0.14577	-0.231296	-0.761281	-0.964881	-0.646381	-0.53107	-0.73566	5	5	5	23.2	23.2	23.2	26.87	0	31.119	258410000	26
FMR1	Fragile X mental retardation protein 1	Q06787-8;Q06787-6;Q06787-2;Q06787-4;Q06787-5;Q06787-9;Q06787-7;Q06787-3;Q06787;Q06787-11;Q06787-10	Q06787-8;Q06787-6;Q06787-2;Q06787-4;Q06787-5;Q06787-9;Q06787-7;Q06787-3;Q06787;Q06787-11;Q06787-10			NaN	-0.232311	0.232311	0.109879	-0.146719	0.0206718	0.111328	NaN	0.0111523	NaN	0.265562	0.0654545	5	5	2	8.9	8.9	2.9	66.245	0	29.426	218200000	17
PRDX1	Peroxiredoxin-1	Q06830	Q06830			-0.00519816	0.18542	-0.180222	0.0686334	0.0372327	0.0579732	0.242292	-0.287379	0.0349611	-0.0705191	0.316385	0.112697	13	13	10	61.3	61.3	48.2	22.11	0	109.49	11736000000	160
RPL18	60S ribosomal protein L18	Q07020;Q07020-2	Q07020;Q07020-2			-0.124964	-0.421152	0.546116	-0.643192	-1.10587	-0.710947	-1.10851	-0.58243	-0.899227	0.0405083	-0.279465	-0.374029	11	11	11	47.3	47.3	47.3	21.634	0	228.45	79280000000	332
C1QBP	Complement component 1 Q subcomponent-binding protein, mitochondrial	Q07021	Q07021			-0.247954	0.182514	0.0654405	0.283733	0.147851	0.398877	0.337797	0.899806	0.816058	0.560226	0.699849	0.492093	5	5	5	22	22	22	31.362	0	71.955	2633700000	102
CKAP4	Cytoskeleton-associated protein 4	Q07065	Q07065			-0.260353	-0.0987015	0.359055	1.88471	2.02225	1.92449	2.24225	2.03262	2.32441	1.29312	1.20637	1.46219	27	27	27	50.3	50.3	50.3	66.022	0	323.31	6780200000	312
SRSF1	Serine/arginine-rich splicing factor 1	Q07955;Q07955-3;Q07955-2	Q07955;Q07955-3;Q07955-2			0.126529	-0.622552	0.496023	-0.948046	-0.487641	-0.171866	-0.953723	-0.538562	NaN	-0.910247	-0.834986	-0.442441	6	6	6	19.4	19.4	19.4	27.744	0	49.38	478260000	54
DHX9	ATP-dependent RNA helicase A	Q08211;Q08211-2	Q08211			-0.07864	-0.213877	0.292517	0.22716	-0.348299	0.0755215	0.41189	0.410397	0.405632	0.828093	0.768778	0.475245	19	19	19	16.8	16.8	16.8	140.96	0	142.71	2008300000	173
SSRP1	FACT complex subunit SSRP1	Q08945	Q08945			-0.0357272	0.157104	-0.121377	-0.0589225	0.0827249	0.0224393	0.769595	0.809886	1.17283	-0.298682	0.838779	-0.274941	4	4	4	7.1	7.1	7.1	81.074	0	47.029	459820000	40
NSUN2	tRNA (cytosine(34)-C(5))-methyltransferase	Q08J23;Q08J23-2;Q08J23-3	Q08J23;Q08J23-2;Q08J23-3			0.0564969	0.205877	-0.262374	-0.19584	0.326984	0.473598	0.868959	0.203708	0.460719	-0.369874	-0.179299	0.282735	14	14	14	19.3	19.3	19.3	86.47	0	90.024	643430000	59
RBBP4	Histone-binding protein RBBP4	Q09028-3;Q09028;Q09028-2;Q09028-4	Q09028-3;Q09028;Q09028-2;Q09028-4			0.0424074	0.0179284	-0.0603358	0.161397	0.491136	0.141923	0.417499	NaN	0.073686	-0.143847	0.190358	0.171953	7	2	2	19	10	10	46.158	0	20.58	540580000	6
NCBP1	Nuclear cap-binding protein subunit 1	Q09161	Q09161			-0.303153	0.198575	0.104579	0.217261	0.0776431	-0.00852712	0.521178	0.611415	0.446988	-0.0471299	0.58882	0.416907	4	4	4	5.3	5.3	5.3	91.838	0	28.166	344630000	28
TWF1	Twinfilin-1	Q12792;Q12792-4;Q12792-3	Q12792;Q12792-4;Q12792-3			-0.0751991	0.0443668	0.0308323	-0.0867405	-0.432327	-0.0554829	-0.167284	-0.840618	NaN	-0.118391	-0.0768414	-0.173578	3	3	3	9.7	9.7	9.7	40.282	0	19.243	77280000	9
SF3A3	Splicing factor 3A subunit 3	Q12874	Q12874			0.0190976	0.00333913	-0.0224368	-0.173634	-0.116196	-0.0634009	-0.245211	NaN	NaN	NaN	NaN	0.00468953	4	4	4	10.2	10.2	10.2	58.848	0	22.643	290000000	5
ILF2	Interleukin enhancer-binding factor 2	Q12905	Q12905			0.270716	-0.672099	0.401383	1.15963	0.710261	0.525727	0.948741	0.550503	0.422333	0.664059	0.592492	0.653918	7	7	7	23.8	23.8	23.8	43.062	0	53.122	831900000	42
ILF3	Interleukin enhancer-binding factor 3	Q12906-5;Q12906-4;Q12906-2;Q12906-6;Q12906-3;Q12906;Q12906-7;Q96SI9-2;Q96SI9	Q12906-5;Q12906-4;Q12906-2;Q12906-6;Q12906-3;Q12906;Q12906-7			-0.0964979	-0.110559	0.207057	0.0700995	-0.305784	-0.32891	-0.0830758	-0.416334	-0.203212	0.296324	1.02193	-0.164052	14	14	14	23.5	23.5	23.5	74.606	0	118.49	1575100000	84
TRAP1	Heat shock protein 75 kDa, mitochondrial	Q12931-2;Q12931	Q12931-2;Q12931			0.0147743	0.0258865	-0.0406609	-0.0224476	-0.162758	-0.0768719	0.567533	-1.32639	0.283907	-1.64348	-0.443144	0.00953484	11	11	11	18.6	18.6	18.6	74.267	0	74.875	813640000	52
ECH1	Delta(3,5)-Delta(2,4)-dienoyl-CoA isomerase, mitochondrial	Q13011	Q13011			NaN	-0.0235481	0.0235481	-0.156076	-0.00417519	-0.0375538	0.0203762	0.0848522	-0.212452	0.225466	-0.480047	-0.0644379	3	3	3	8.5	8.5	8.5	35.816	0	20.746	144760000	12
ACACA	Acetyl-CoA carboxylase 1;Biotin carboxylase	Q13085;Q13085-4;Q13085-2;O00763-3;O00763-2;O00763	Q13085;Q13085-4;Q13085-2			0.0681744	-0.105619	0.0374451	-0.488285	-1.44536	-0.99497	-0.928764	-0.142353	-0.396261	0.627651	0.0367241	-0.202293	96	96	4	45.9	45.9	2.3	265.55	0	323.31	64416000000	1460
GPS1	COP9 signalosome complex subunit 1	Q13098-5;Q13098;Q13098-7;Q13098-6	Q13098-5;Q13098;Q13098-7;Q13098-6			-0.142981	-0.135674	0.278655	-0.129796	0.47945	-0.157626	-0.550877	-0.291749	-0.912669	-0.568318	-0.651585	-0.14841	4	4	4	12.9	12.9	12.9	55.092	0	25.994	218590000	34
TARDBP	TAR DNA-binding protein 43	Q13148;Q13148-4	Q13148;Q13148-4			0.261306	-0.0258853	-0.235421	-0.0364997	-0.0048701	0.151847	-0.248887	-0.243922	NaN	-0.203299	0.16518	-0.0220782	5	5	5	12.6	12.6	12.6	44.739	0	33.532	232880000	35
PRDX4	Peroxiredoxin-4	Q13162	Q13162			-0.144988	0.289485	-0.144498	-0.316489	-0.116082	-0.550318	-0.499171	-0.537783	-0.107798	-0.521825	0.380315	-0.154549	7	5	5	29.2	23.6	23.6	30.54	0	46.85	1574900000	61
CBX3	Chromobox protein homolog 3	Q13185;P83916	Q13185			0.14238	-0.0387783	-0.103601	0.416992	0.891562	0.553129	0.390787	0.987221	0.283516	-0.0595188	0.879824	0.0434723	4	4	4	23.5	23.5	23.5	20.811	0	34.05	757390000	53
PSMD2	26S proteasome non-ATPase regulatory subunit 2	Q13200;Q13200-2;Q13200-3	Q13200;Q13200-2;Q13200-3			-0.0106468	-0.0519829	0.0626297	0.262857	0.382032	0.106945	0.0602474	-0.396967	0.400986	0.335079	0.651148	0.426407	14	14	14	18.9	18.9	18.9	100.2	0	147.21	1401400000	143
SRSF6	Serine/arginine-rich splicing factor 6	Q13247-3;Q13247;Q13247-2	Q13247-3;Q13247			-0.0208937	-0.227286	0.24818	-0.592578	-0.321675	-0.263472	-0.763913	-0.75528	-1.04411	-1.47926	-0.726079	-0.147015	6	6	3	15.8	15.8	6	38.418	0	75.422	802310000	64
TRIM28	Transcription intermediary factor 1-beta	Q13263;Q13263-2	Q13263;Q13263-2			0.0686925	0.16516	-0.233853	0.281034	0.51176	0.345657	0.686878	0.587928	1.01083	0.483358	1.0344	0.497196	21	21	21	35.3	35.3	35.3	88.549	0	209.32	4690400000	226
PABPC4	Polyadenylate-binding protein 4	Q13310-2;Q13310;Q13310-3;P0CB38	Q13310-2;Q13310;Q13310-3			-0.0230904	0.06674	-0.0436497	0.323761	0.259373	-0.155407	0.706398	0.0897484	0.67066	NaN	NaN	0.0337811	12	6	6	17.9	9.2	9.2	69.578	0	41.994	394960000	24
EIF3I	Eukaryotic translation initiation factor 3 subunit I	Q13347	Q13347			-0.197666	0.026261	0.171405	-0.0820077	0.180476	0.246701	0.0952555	-0.951724	-0.0927919	-0.472568	0.16837	-0.0229123	7	7	7	24	24	24	36.501	0	51.222	810400000	65
TCOF1	Treacle protein	Q13428-2;Q13428-8;Q13428;Q13428-3;Q13428-4;Q13428-6;Q13428-7	Q13428-2;Q13428-8;Q13428;Q13428-3;Q13428-4;Q13428-6;Q13428-7			-0.0511112	-0.0857506	0.136862	-0.854473	-0.637314	-0.350643	-0.330013	NaN	NaN	NaN	NaN	-0.364849	6	6	6	5.1	5.1	5.1	144.31	0	41.991	259130000	27
SF3B2	Splicing factor 3B subunit 2	Q13435	Q13435			0.13516	0.20739	-0.34255	-0.70878	-0.343405	-0.10453	-0.412153	NaN	-0.707508	NaN	NaN	-0.0741749	6	6	6	7.4	7.4	7.4	100.23	0	39.094	720190000	25
PRPF4B	Serine/threonine-protein kinase PRP4 homolog	Q13523	Q13523			0.477825	-0.0870482	-0.390776	-0.823729	0.0826658	-0.588425	-0.0620238	NaN	NaN	NaN	NaN	0.139692	6	6	6	5.2	5.2	5.2	116.99	0	46.406	176370000	13
CUL4B;CUL4A	Cullin-4B;Cullin-4A	Q13620-3;Q13620-1;Q13620;Q13619-2;Q13619	Q13620-3;Q13620-1;Q13620;Q13619-2;Q13619			0.154353	-0.0764949	-0.0778586	0.0690435	0.518272	-0.0831725	0.605233	0.624456	0.651037	0.561046	0.382322	0.358213	6	6	6	9.8	9.8	9.8	84.016	0	43.118	321980000	42
DDX39B	Spliceosome RNA helicase DDX39B	Q13838;Q13838-2	Q13838;Q13838-2			0.135232	0.00946744	-0.1447	0.926021	0.768798	0.972596	1.18764	1.74377	1.38828	0.808202	0.732124	0.820638	12	12	3	29.7	29.7	8.9	48.991	0	108.74	3956200000	174
BLMH	Bleomycin hydrolase	Q13867	Q13867			-0.161848	0.0558186	0.10603	0.322897	-0.266331	0.154894	-0.509153	0.32818	0.0452385	0.56406	0.290539	0.288235	6	6	6	17.1	17.1	17.1	52.562	0	40.401	582380000	49
TUBB2A	Tubulin beta-2A chain	Q13885	Q13885			0.0357558	-0.330625	0.294869	0.206532	0.294457	0.469159	0.741767	0.601153	1.13089	0.404996	0.886006	-0.0812906	20	5	1	61.3	16.9	2.7	49.906	0	57.839	881250000	76
IDI1	Isopentenyl-diphosphate Delta-isomerase 1	Q13907;Q13907-2	Q13907;Q13907-2			0.119303	-0.0743942	-0.0449085	0.268402	0.521389	0.382675	0.331896	0.447092	0.597965	0.454298	0.960371	0.470316	4	4	4	18.9	18.9	18.9	26.319	0	27.692	238660000	31
CKAP5	Cytoskeleton-associated protein 5	Q14008-2;Q14008;Q14008-3	Q14008-2;Q14008;Q14008-3			0.138119	-0.17724	0.0391204	-0.237983	-0.0931161	-0.0263036	0.301968	0.573552	0.201512	0.0783621	0.293984	-0.105768	12	12	12	7.3	7.3	7.3	218.52	0	82.609	517650000	65
HNRNPD	Heterogeneous nuclear ribonucleoprotein D0	Q14103-3;Q14103;Q14103-4;Q14103-2	Q14103-3;Q14103;Q14103-4;Q14103-2			-0.103086	0.391987	-0.288902	0.133691	-0.00894864	0.194306	-0.270353	0.616505	0.498469	0.255244	0.565428	0.47449	6	6	5	25.5	25.5	22.9	32.834	0	87.025	1165100000	70
EIF3A	Eukaryotic translation initiation factor 3 subunit A	Q14152-2;Q14152	Q14152-2;Q14152			-0.0535329	-0.00562032	0.0591532	0.377658	0.230616	0.0797755	0.336835	0.367865	0.593922	0.0845667	0.296427	-0.0876783	10	10	10	7.6	7.6	7.6	162.63	0	65.278	684280000	66
TTLL12	Tubulin--tyrosine ligase-like protein 12	Q14166	Q14166			0.0468318	-0.316968	0.270137	0.520207	0.255475	-0.0437177	0.526416	0.116368	-0.23672	-0.0721238	0.618756	0.160777	6	6	6	11.6	11.6	11.6	74.403	0	45.073	336080000	29
DPYSL3	Dihydropyrimidinase-related protein 3	Q14195-2;Q14195	Q14195-2			0.149865	-0.143904	-0.0059611	-0.093991	0.030372	0.164779	-0.863732	NaN	NaN	0.498426	-0.458989	0.378238	5	4	4	8	6.9	6.9	73.91	0	28.671	161910000	14
DYNC1H1	Cytoplasmic dynein 1 heavy chain 1	Q14204	Q14204			-0.00850677	0.116909	-0.108402	-0.183565	-0.546261	-0.627676	-0.280931	-1.24704	-0.677855	0.579994	0.0291195	0.13043	34	34	34	8.1	8.1	8.1	532.4	0	213.81	1495300000	132
FLOT2	Flotillin-2	Q14254	Q14254			-0.0991446	0.172553	-0.0734088	0.72294	0.0483945	-0.0640303	-0.10969	-0.00304667	NaN	-0.462699	-0.704434	0.17904	8	8	8	20.1	20.1	20.1	47.064	0	49.765	294590000	36
CAPRIN1	Caprin-1	Q14444-2;Q14444	Q14444-2;Q14444			0.0723171	-0.0415611	-0.030756	-0.0485878	-0.0109367	-0.0789871	-0.274632	NaN	-0.050108	NaN	NaN	-0.0683498	2	2	2	3.3	3.3	3.3	76.861	0	15.303	184600000	21
RBM39	RNA-binding protein 39	Q14498-3;Q14498-2;Q14498	Q14498-3;Q14498-2;Q14498			0.126856	-0.187055	0.0601985	-0.398048	-1.31402	-0.692548	-1.09552	-0.560743	-1.10215	0.611554	0.180508	0.77076	5	5	5	11	11	11	57.089	0	48.804	424380000	45
MCM6	DNA replication licensing factor MCM6	Q14566	Q14566			0.124691	-0.15469	0.0299988	0.263567	0.221291	0.359591	0.795616	0.221832	0.0165825	0.0492077	0.0932026	0.601822	15	15	15	21.2	21.2	21.2	92.888	0	106.57	963670000	64
GANAB	Neutral alpha-glucosidase AB	Q14697;Q14697-2	Q14697;Q14697-2			-0.00757154	-0.027633	0.0352046	0.34117	0.296961	0.209441	0.294142	0.609299	0.346181	0.493558	0.389428	0.61126	25	25	25	29.2	29.2	29.2	106.87	0	221.64	4755500000	270
LBR	Lamin-B receptor	Q14739	Q14739			0.374814	-0.800244	0.42543	0.638587	0.206382	0.391704	0.854627	0.428653	0.920797	0.64035	0.279926	0.451413	7	7	7	12.4	12.4	12.4	70.702	0	45.301	622820000	56
KPNB1	Importin subunit beta-1	Q14974;Q14974-2	Q14974;Q14974-2			0.0995102	-0.0310173	-0.0684929	0.0581493	0.136755	-0.0487232	0.257103	0.423626	0.473433	0.243238	0.505165	0.0704651	25	25	25	34.5	34.5	34.5	97.169	0	263.64	14272000000	439
PSMD6	26S proteasome non-ATPase regulatory subunit 6	Q15008;Q15008-4;Q15008-3;Q15008-2	Q15008;Q15008-4;Q15008-3;Q15008-2			0.191134	-0.00370153	-0.187433	-0.131191	-0.0687936	0.31046	-0.390937	0.045674	0.315779	-0.0400499	-0.266216	-0.32756	13	13	13	34.7	34.7	34.7	45.531	0	100.78	1126500000	109
2020-09-02	Septin-2	Q15019;Q15019-3;Q15019-2	Q15019;Q15019-3;Q15019-2			-0.0650241	0.10366	-0.0386359	-0.0877444	0.244161	-0.24507	0.200933	-0.0523135	-0.00600306	0.327825	0.291984	0.0823835	3	3	3	8.9	8.9	8.9	41.487	0	18.286	396990000	23
EFTUD2	116 kDa U5 small nuclear ribonucleoprotein component	Q15029-2;Q15029-3;Q15029	Q15029-2;Q15029-3;Q15029			-0.270631	0.12733	0.143302	0.224623	-0.0635236	0.0148722	0.377072	-0.183305	0.0288798	0.159226	0.38848	-0.257034	13	12	12	17.4	16.3	16.3	105.38	0	84.681	1407200000	91
KARS	Lysine--tRNA ligase	Q15046;Q15046-2	Q15046;Q15046-2			-0.107367	0.0727189	0.0346483	0.760495	0.119043	0.624406	0.34941	0.0608457	0.808667	NaN	0.789766	0.322988	7	7	7	12.6	12.6	12.6	68.047	0	47.794	376350000	43
EIF4H	Eukaryotic translation initiation factor 4H	Q15056-2;Q15056	Q15056-2;Q15056			0.0955963	-0.0955963	NaN	0.0921822	0.118191	-0.0379333	-0.0319767	NaN	0.113886	NaN	NaN	-0.00548172	4	4	4	23.2	23.2	23.2	25.2	0	37.71	224200000	12
PDIA6	Protein disulfide-isomerase A6	Q15084-5;Q15084-3;Q15084;Q15084-4;Q15084-2	Q15084-5;Q15084-3;Q15084;Q15084-4;Q15084-2			-0.223759	0.25078	-0.0270214	0.853609	0.909506	0.920256	1.35056	1.45526	1.47497	0.728624	1.06819	0.543032	9	9	9	25.6	25.6	25.6	53.261	0	118.48	2654400000	137
PAFAH1B3	Platelet-activating factor acetylhydrolase IB subunit gamma	Q15102	Q15102			-0.371672	0.0748247	0.296848	0.416351	0.148893	0.504491	0.393009	0.20433	0.729616	NaN	0.659377	0.380699	4	4	4	22.1	22.1	22.1	25.734	0	34.825	365470000	13
PPA1	Inorganic pyrophosphatase	Q15181	Q15181			-0.108722	0.0397498	0.0689723	-0.103456	0.407214	0.184588	0.216654	0.670409	0.859648	NaN	0.318413	-0.0135644	5	5	5	19.4	19.4	19.4	32.66	0	39.873	812790000	44
NONO	Non-POU domain-containing octamer-binding protein	Q15233-2;Q15233	Q15233-2;Q15233			-0.343702	0.0348892	0.308813	-0.535065	NaN	-0.145973	-0.0388699	NaN	NaN	0.216953	-0.0250111	-0.199623	6	6	5	19.4	19.4	17.3	43.866	0	40.146	511270000	17
PCBP1;PCBP3	Poly(rC)-binding protein 1;Poly(rC)-binding protein 3	Q15365;P57721-2;P57721-3;P57721-5;P57721-4;P57721;P57723-2;P57723	Q15365;P57721-2;P57721-3;P57721-5;P57721-4;P57721			-0.0314846	-0.173941	0.205425	0.415628	0.0830956	0.255545	0.506264	-0.0942707	0.149042	0.276371	-0.302792	0.294523	8	8	4	26.4	26.4	13.2	37.497	0	65.245	1867400000	87
PCBP2	Poly(rC)-binding protein 2	Q15366-6;Q15366-3;Q15366;Q15366-2;Q15366-7;Q15366-8;Q15366-4;Q15366-5	Q15366-6;Q15366-3;Q15366;Q15366-2;Q15366-7;Q15366-8;Q15366-4;Q15366-5			-0.212114	0.236374	-0.0242596	0.333899	0.479298	0.158907	0.16684	0.367182	0.50086	NaN	-0.802822	0.0743198	7	3	3	26	13	13	38.15	0	26.833	1412500000	46
TCEB2	Transcription elongation factor B polypeptide 2	Q15370;Q15370-2	Q15370;Q15370-2			0.0444597	0.0609449	-0.105405	0.147506	0.198348	-0.332505	-0.650159	NaN	-0.350247	-0.37749	-0.0152594	-0.127204	4	4	4	33.9	33.9	33.9	13.133	0	27.851	491480000	42
SF3B3	Splicing factor 3B subunit 3	Q15393;Q15393-2;Q15393-3	Q15393			0.298627	-0.224435	-0.0741914	0.335122	0.232556	-0.00358518	0.469237	0.332074	0.0377967	0.29167	0.282998	0.0109145	14	14	14	14	14	14	135.58	0	109.39	1454000000	100
CNN3	Calponin-3	Q15417;Q15417-3;Q15417-2;Q99439-2;Q99439	Q15417;Q15417-3;Q15417-2			0.469158	-0.355361	-0.113797	-0.260846	-0.133727	-0.958005	-1.031	-0.831244	-0.902966	NaN	NaN	-0.127633	4	4	4	16.1	16.1	16.1	36.413	0	28.073	388310000	26
TSN	Translin	Q15631	Q15631			0.389845	-0.0219536	-0.367891	0.0627651	0.117136	-0.329319	-0.189892	-0.745523	-0.0948277	NaN	-0.173698	-0.285879	2	2	2	12.3	12.3	12.3	26.183	0	18.163	449930000	37
MAPRE1	Microtubule-associated protein RP/EB family member 1	Q15691;Q9UPY8-2;Q9UPY8	Q15691			0.07809	0.15501	-0.2331	-0.924847	-0.260941	-0.691069	-0.54233	-1.73594	-0.575474	-0.603966	-0.113557	-0.122468	12	12	12	55.2	55.2	55.2	29.999	0	129.38	3345700000	129
NSDHL	Sterol-4-alpha-carboxylate 3-dehydrogenase, decarboxylating	Q15738	Q15738			0.0573152	-0.0532576	-0.00405757	0.335775	0.142377	0.0145944	0.0192769	0.324611	0.561399	0.378278	-0.00174777	0.330587	3	3	3	11.3	11.3	11.3	41.9	0	20.098	168050000	18
SLC1A5	Neutral amino acid transporter B(0)	Q15758;Q15758-3;Q15758-2	Q15758			0.13526	0.208567	-0.343828	1.14088	1.50333	0.952269	0.250905	1.54777	1.89029	0.875806	1.02845	0.69422	5	5	5	10.2	10.2	10.2	56.598	0	49.181	355060000	55
2020-09-07	Septin-7	Q16181-2;Q16181;Q6ZU15	Q16181-2;Q16181			-0.00212924	-0.095761	0.0978902	0.129758	0.550666	0.303708	0.398132	0.172534	0.745502	0.607807	0.659541	0.266267	9	9	9	25.5	25.5	25.5	50.58	0	72.049	1321100000	97
DDB1	DNA damage-binding protein 1	Q16531;Q16531-2	Q16531			-0.0468013	0.0262197	0.0205816	0.269691	0.101203	0.143522	0.397451	0.537948	0.776101	0.453492	0.747455	0.0439695	19	19	19	15.9	15.9	15.9	126.97	0	124.1	2345700000	104
CDC37	Hsp90 co-chaperone Cdc37;Hsp90 co-chaperone Cdc37, N-terminally processed	Q16543	Q16543			0.205219	-0.141689	-0.06353	0.30232	0.179028	0.406977	0.483473	0.826784	0.798292	0.444632	0.245459	-0.0451469	6	6	6	22.5	22.5	22.5	44.468	0	48.922	1199300000	54
DPYSL2	Dihydropyrimidinase-related protein 2	Q16555-2;Q16555;Q14194;Q14194-2	Q16555-2;Q16555			-0.0892245	-0.258876	0.3481	0.580734	0.570241	0.536943	0.967992	0.322797	0.632079	0.302747	0.523849	0.254039	6	6	5	15.5	15.5	14	58.162	0	54.622	526450000	35
RBBP7	Histone-binding protein RBBP7	Q16576;Q16576-2	Q16576;Q16576-2			-0.18922	0.107569	0.0816504	0.0848738	0.176198	0.155516	0.238518	1.19489	0.488988	0.315396	0.338681	0.142239	8	8	3	20.2	20.2	11.5	47.82	0	96.584	3853400000	94
SRSF7	Serine/arginine-rich splicing factor 7	Q16629-3;Q16629-2;Q16629-4;Q16629	Q16629-3;Q16629-2;Q16629-4;Q16629			0.506899	-0.572321	0.0654221	NaN	-0.362484	-0.418581	NaN	NaN	0.0472202	NaN	0.0513783	-0.0507298	4	3	3	31.8	31.8	31.8	15.257	0	24.19	334400000	25
FSCN1	Fascin	Q16658	Q16658			0.209381	-0.0257072	-0.183674	0.16106	0.23967	0.289171	0.0303993	0.374134	0.625294	0.787426	0.0955181	0.402002	12	12	12	25.4	25.4	25.4	54.529	0	132.5	2510300000	133
TXNRD1	Thioredoxin reductase 1, cytoplasmic	Q16881-5;Q16881-2;Q16881-4;Q16881-3;Q16881-6;Q16881;Q16881-7	Q16881-5;Q16881-2;Q16881-4;Q16881-3;Q16881-6;Q16881;Q16881-7			-0.125139	-0.231036	0.356175	-0.260431	-0.460651	-0.491245	-0.90875	-0.344663	-0.224056	-0.944742	-0.626296	-0.575485	5	5	5	10.6	10.6	10.6	54.753	0	34.833	280360000	41
IMMT	MICOS complex subunit MIC60	Q16891-2;Q16891;Q16891-4;Q16891-3	Q16891-2;Q16891;Q16891-4;Q16891-3			0.0929317	0.0933666	-0.186298	-0.722771	-0.232029	-0.896656	-0.911112	-1.18011	-0.731508	-0.356451	0.136332	-0.220423	10	10	10	17.8	17.8	17.8	82.624	0	101.55	804710000	77
TIMM50	Mitochondrial import inner membrane translocase subunit TIM50	Q3ZCQ8;Q3ZCQ8-2;Q3ZCQ8-3	Q3ZCQ8;Q3ZCQ8-2;Q3ZCQ8-3			-0.0556577	-0.150029	0.205687	1.40587	1.17036	0.760413	1.28604	1.71349	1.4957	1.07987	0.678496	1.00286	5	5	5	20.4	20.4	20.4	39.646	0	45.182	629820000	50
PITRM1	Presequence protease, mitochondrial	Q5JRX3;Q5JRX3-2;Q5JRX3-3	Q5JRX3;Q5JRX3-2;Q5JRX3-3			0.406745	-0.336762	-0.0699832	-0.221381	NaN	-0.560712	NaN	-1.01562	NaN	-0.131919	NaN	0.352411	6	6	6	6.6	6.6	6.6	117.41	0	42.024	198310000	20
PRPF38B	Pre-mRNA-splicing factor 38B	Q5VTL8;Q5VTL8-2	Q5VTL8;Q5VTL8-2			0.0560856	-0.0201836	-0.035902	-0.403629	-0.525312	-0.632511	-0.582203	NaN	NaN	NaN	NaN	-0.545511	3	3	3	5.1	5.1	5.1	64.467	0	16.69	172190000	7
ECM29	Proteasome-associated protein ECM29 homolog	Q5VYK3	Q5VYK3			-0.0656465	0.0872389	-0.0215925	-0.640954	0.0417506	-0.0951131	-0.425254	0.482728	NaN	0.193385	0.610013	0.223923	10	10	10	6	6	6	204.29	0	62.864	261280000	26
PRPF8	Pre-mRNA-processing-splicing factor 8	Q6P2Q9	Q6P2Q9	+		-0.395248	NaN	0.395248	-0.432432	-0.625706	NaN	-0.762079	0.717279	0.0772934	-0.579983	NaN	-0.0339108	11	11	11	4.6	4.6	4.6	273.6	0	65.62	331250000	22
BRAT1	BRCA1-associated ATM activator 1	Q6PJG6;Q6PJG6-2;Q6PJG6-3	Q6PJG6			0.128754	NaN	-0.128754	0.0394669	0.471817	-0.0481491	0.366352	NaN	0.664755	0.125011	NaN	0.298868	6	6	6	9.4	9.4	9.4	88.118	0	36.127	241070000	22
RPS27L	40S ribosomal protein S27-like	Q71UM5	Q71UM5			0.106591	-0.0198205	-0.0867704	0.407204	0.101664	0.192309	-0.14615	1.46052	1.07464	-0.104019	0.208459	0.605164	3	3	1	38.1	38.1	13.1	9.4771	0	27.967	913290000	47
SND1	Staphylococcal nuclease domain-containing protein 1	Q7KZF4	Q7KZF4			-0.0176665	-0.00313059	0.0207971	0.0601495	0.157344	-0.0675017	0.17308	0.00861104	0.297994	0.268382	0.0660508	0.27445	23	23	23	32	32	32	102	0	170.35	1885700000	176
DDX46	Probable ATP-dependent RNA helicase DDX46	Q7L014	Q7L014			-0.0407702	0.211913	-0.171143	-0.558551	-0.305579	-0.460723	-0.60463	-1.48334	-0.969336	-0.968905	-0.535901	-0.564465	24	24	24	25.1	25.1	25.1	117.36	0	204.06	2455400000	183
BZW1	Basic leucine zipper and W2 domain-containing protein 1	Q7L1Q6-2;Q7L1Q6;Q7L1Q6-4;Q7L1Q6-3	Q7L1Q6-2;Q7L1Q6;Q7L1Q6-4;Q7L1Q6-3			0.128585	0.0884501	-0.217035	0.022042	0.372315	0.271617	-0.337615	-0.146734	-0.0263437	NaN	-0.833738	-0.302871	6	6	5	14.4	14.4	12.5	40.538	0	35.526	276040000	32
EIF3M	Eukaryotic translation initiation factor 3 subunit M	Q7L2H7;Q7L2H7-2	Q7L2H7;Q7L2H7-2			0	NaN	NaN	0.806797	0.390961	0.240877	0.255125	0.635107	NaN	NaN	0.60133	0.0321617	4	4	4	15.5	15.5	15.5	42.502	0	25.995	259220000	16
RSRC2	Arginine/serine-rich coiled-coil protein 2	Q7L4I2-2;Q7L4I2	Q7L4I2-2;Q7L4I2			0.252953	0.632073	-0.885026	-1.31915	0.363572	NaN	NaN	NaN	-1.04933	NaN	-0.198596	-0.671455	5	5	5	12.7	12.7	12.7	44.878	0	41.762	241190000	26
CAND1	Cullin-associated NEDD8-dissociated protein 1	Q86VP6;Q86VP6-2;Q86VP6-3;O75155-2;O75155	Q86VP6;Q86VP6-2			0.170285	0.0174052	-0.18769	-0.203794	-0.0988534	-0.32603	-0.115131	0.124467	0.165671	0.420718	0.533961	0.0551535	28	28	28	25.3	25.3	25.3	136.37	0	255.42	8745100000	426
SRRM1	Serine/arginine repetitive matrix protein 1	Q8IYB3-2;Q8IYB3	Q8IYB3-2;Q8IYB3			-0.211459	-0.227933	0.439391	-0.462739	-0.664733	-0.911158	-1.32388	-0.273495	-0.203698	0.475307	-0.109166	-0.204535	6	6	6	10.6	10.6	10.6	102.12	0	73.655	1412900000	85
ALDH16A1	Aldehyde dehydrogenase family 16 member A1	Q8IZ83-3;Q8IZ83	Q8IZ83-3;Q8IZ83		x	-0.0795431	0.0795431	NaN	0.52197	0.440352	-0.110009	0.423398	NaN	-0.116689	0.415946	NaN	0.441064	3	3	3	5.5	5.5	5.5	79.917	0	21.895	147040000	16
PELP1	Proline-, glutamic acid- and leucine-rich protein 1	Q8IZL8	Q8IZL8			0.00970014	-0.316641	0.306941	-0.601939	-0.870364	-0.35604	NaN	NaN	NaN	0.24884	NaN	-0.439484	4	4	4	6.5	6.5	6.5	119.7	0	29.103	160050000	16
LRRC47	Leucine-rich repeat-containing protein 47	Q8N1G4	Q8N1G4			-0.291886	-0.311553	0.603439	0.0988916	0.116063	0.0236524	0.430168	0.840511	0.80453	0.386201	-0.0803534	0.0605424	8	8	8	16	16	16	63.472	0	51.648	435970000	30
NHLRC2	NHL repeat-containing protein 2	Q8NBF2-2;Q8NBF2	Q8NBF2-2;Q8NBF2			0	NaN	NaN	0.686646	0.532513	0.0508671	0.270384	1.1301	NaN	0.595606	NaN	0.196932	3	3	3	8.2	8.2	8.2	39.697	0	18.786	98057000	17
TXNDC5	Thioredoxin domain-containing protein 5	Q8NBS9-2;Q8NBS9	Q8NBS9-2;Q8NBS9			-0.148566	-0.299708	0.448274	0.934692	1.10248	1.11999	1.25809	1.4226	1.69297	0.761514	1.18873	0.585082	6	6	6	21	21	21	36.177	0	54.017	787610000	87
SERBP1	Plasminogen activator inhibitor 1 RNA-binding protein	Q8NC51-4;Q8NC51-3;Q8NC51-2;Q8NC51	Q8NC51-4;Q8NC51-3;Q8NC51-2;Q8NC51			-0.0190144	0.192211	-0.173197	-1.01196	-0.811737	-0.149366	-1.42505	-0.44249	NaN	-0.355207	-1.28144	-0.64986	6	6	6	20.9	20.9	20.9	42.426	0	95.365	938630000	31
APOA1BP	NAD(P)H-hydrate epimerase	Q8NCW5-2;Q8NCW5	Q8NCW5-2;Q8NCW5			NaN	0.211904	-0.211904	0.539449	0.50265	0.10636	0.591479	0.65235	1.47259	0.44571	1.08418	0.239398	3	3	3	26.5	26.5	26.5	20.43	0	23.085	382390000	17
ABCF1	ATP-binding cassette sub-family F member 1	Q8NE71-2;Q8NE71	Q8NE71-2;Q8NE71			NaN	-0.661957	0.661957	0.173557	-0.1339	-0.473087	0.395691	0.125542	-0.106255	0.725569	NaN	0.0198269	4	4	4	5.8	5.8	5.8	91.679	0	28.29	168280000	36
HM13	Minor histocompatibility antigen H13	Q8TCT9-5;Q8TCT9;Q8TCT9-4;Q8TCT9-2	Q8TCT9-5;Q8TCT9;Q8TCT9-4;Q8TCT9-2			NaN	NaN	0	0.701767	0.537905	0.363514	0.397581	0.802553	0.685566	0.608	1.209	0.407093	3	3	3	13.7	13.7	13.7	36.813	0	34.767	712350000	48
NUP210	Nuclear pore membrane glycoprotein 210	Q8TEM1;Q8TEM1-2	Q8TEM1			NaN	0.466085	-0.466085	0.31452	0.547035	1.10168	1.94045	0.838573	1.41434	2.34808	1.88086	2.12586	12	12	12	7.2	7.2	7.2	205.11	0	80.957	483780000	27
TMEM263	Transmembrane protein 263	Q8WUH6	Q8WUH6			-0.57976	0.565042	0.0147171	0.101917	-0.886398	-0.463234	-1.16081	0.0931149	-0.0450649	1.48348	0.503481	0.0441113	4	4	4	52.6	52.6	52.6	11.748	0	56.903	1216800000	47
PDCD6IP	Programmed cell death 6-interacting protein	Q8WUM4;Q8WUM4-2;Q8WUM4-3	Q8WUM4;Q8WUM4-2			0.0894782	0.106709	-0.196187	0.28279	0.484942	0.297331	0.506888	0.779584	0.508042	0.220944	0.666136	0.0952174	14	14	14	18.2	18.2	18.2	96.022	0	105.77	1080200000	82
ATXN2L	Ataxin-2-like protein	Q8WWM7-6;Q8WWM7-8;Q8WWM7-5;Q8WWM7-4;Q8WWM7-9;Q8WWM7-2;Q8WWM7;Q8WWM7-3;Q8WWM7-7	Q8WWM7-6;Q8WWM7-8;Q8WWM7-5;Q8WWM7-4;Q8WWM7-9;Q8WWM7-2;Q8WWM7;Q8WWM7-3;Q8WWM7-7			0.0202421	-0.267602	0.24736	-0.484732	0.0199922	-0.521784	-1.06676	NaN	-0.210631	0.204728	0.210546	0.34485	5	5	5	5.4	5.4	5.4	102.89	0	31.277	145420000	27
IRGQ	Immunity-related GTPase family Q protein	Q8WZA9	Q8WZA9			0.0360076	0.103121	-0.139129	0.264979	0.00268428	-0.294507	-0.0351785	-0.0683435	0.278231	NaN	0.311377	0.25775	7	7	7	14.3	14.3	14.3	62.717	0	44.476	350620000	19
DDX1	ATP-dependent RNA helicase DDX1	Q92499-3;Q92499;Q92499-2	Q92499-3;Q92499;Q92499-2			0.0119292	0.128998	-0.140928	0.390095	0.21164	0.299554	-0.143991	0.486422	-0.352586	0.127581	0.777667	0.533477	6	6	6	10.5	10.5	10.5	68.712	0	49.156	758480000	58
MRPS27	28S ribosomal protein S27, mitochondrial	Q92552;Q92552-2	Q92552;Q92552-2			0.285064	-0.176768	-0.108296	0.248123	0.343006	-0.298129	-0.129395	0.471137	0.245668	0.0380529	-0.126124	-0.0610015	4	4	4	11.1	11.1	11.1	47.611	0	24.312	190760000	14
HSPH1	Heat shock protein 105 kDa	Q92598-2;Q92598;Q92598-4;Q92598-3	Q92598-2;Q92598;Q92598-4;Q92598-3			0.233199	0.0218728	-0.255072	-0.476821	-0.0503108	-0.594786	-0.0339991	-0.29132	-0.462702	-0.349824	-0.310202	-0.221614	18	18	17	24.8	24.8	23.1	92.115	0	138.19	2454500000	156
GCN1L1	Translational activator GCN1	Q92616	Q92616			0.208144	-0.00547345	-0.20267	-0.367326	-0.0449518	-0.822818	0.276158	-0.62343	-0.515685	0.275016	0.0791785	0.20517	24	24	24	10.4	10.4	10.4	292.75	0	151.09	1675500000	55
NUP205	Nuclear pore complex protein Nup205	Q92621	Q92621			-0.125501	-0.33588	0.461381	-0.302339	0.204459	0.000967662	0.35781	-0.948158	NaN	-0.0217145	NaN	-0.104686	8	8	8	4.8	4.8	4.8	227.92	0	46.453	264490000	15
ANP32B	Acidic leucine-rich nuclear phosphoprotein 32 family member B	Q92688-2;Q92688	Q92688-2;Q92688			0.159975	0.0972672	-0.257242	-0.260736	-0.148067	-0.132107	0.174931	-0.67639	0.999443	-0.0141773	-0.0269737	-0.122932	5	4	4	28.7	22.1	22.1	22.276	0	27.924	945280000	54
ARPC1A	Actin-related protein 2/3 complex subunit 1A	Q92747;Q92747-2	Q92747;Q92747-2			0.130122	-0.0230338	-0.107089	0.316915	0.248065	0.525232	0.876388	-0.23103	-0.40836	0.130397	0.072883	0.442325	7	7	7	23	23	23	41.569	0	44.848	484200000	22
HDAC2	Histone deacetylase 2	Q92769-3;Q92769;Q13547	Q92769-3;Q92769			0.153697	-0.228116	0.0744197	-0.111007	-0.0134004	-0.688764	-0.1408	-0.653529	-1.15277	NaN	-0.425638	0.21456	4	4	4	12.4	12.4	12.4	51.998	0	30.795	363980000	38
DDX17	Probable ATP-dependent RNA helicase DDX17	Q92841-1;Q92841-3;Q92841;Q92841-2	Q92841-1;Q92841-3;Q92841;Q92841-2			-0.104589	-0.370906	0.475495	0.158446	-0.226579	-0.0419172	-0.0382875	0.268025	0.791136	0.54716	0.6253	0.306863	12	12	10	20.5	20.5	17.4	72.371	0	94.975	1475900000	94
UPF1	Regulator of nonsense transcripts 1	Q92900-2;Q92900	Q92900-2;Q92900			0.140484	-0.0240033	-0.116481	-0.307447	-0.336688	-0.283252	-0.279765	-0.573814	-0.474588	-0.567291	0.244912	0.0325553	6	6	6	7.6	7.6	7.6	123.03	0	40.79	391660000	19
KHSRP	Far upstream element-binding protein 2	Q92945;Q96I24-2;Q96I24	Q92945			-0.123229	-0.0615304	0.18476	0.55243	0.401313	0.373492	0.277667	0.166421	0.717204	0.15508	0.162881	0.328574	21	21	19	41.6	41.6	38.5	73.114	0	225.67	5452800000	234
TNPO1	Transportin-1	Q92973-2;Q92973;Q92973-3;O14787-2;O14787	Q92973-2;Q92973;Q92973-3			-0.197308	0.32641	-0.129101	0.0879682	-0.0234515	-0.251509	0.54399	0.937915	0.827535	0.0711091	0.711505	0.0176233	13	13	13	16.3	16.3	16.3	101.31	0	92.769	1277800000	90
USP9X;USP9Y	Probable ubiquitin carboxyl-terminal hydrolase FAF-X;Probable ubiquitin carboxyl-terminal hydrolase FAF-Y	Q93008-1;Q93008;O00507;O00507-2	Q93008-1;Q93008;O00507;O00507-2	+		-0.234893	0.174225	0.0606677	-0.473985	-0.216911	-0.420619	-0.362817	-0.634179	-0.538112	0.123755	-0.270006	0.0996863	16	16	16	6.7	6.7	6.7	290.46	0	110.41	831710000	94
USP7	Ubiquitin carboxyl-terminal hydrolase 7	Q93009;Q93009-3	Q93009;Q93009-3	+		0.647227	NaN	-0.647227	1.77964	1.71496	1.71145	2.07749	0.955604	1.97209	1.00765	1.40714	0.943917	15	15	15	15.2	15.2	15.2	128.3	0	112.68	907300000	75
FUBP1	Far upstream element-binding protein 1	Q96AE4;Q96AE4-2	Q96AE4;Q96AE4-2			-0.119254	0.0582835	0.0609709	0.0824153	-0.551708	0.291669	0.235194	-0.702798	-0.297981	-0.521188	0.248828	0.156893	10	8	8	16.6	14.3	14.3	67.56	0	56.282	628900000	50
LRRC59	Leucine-rich repeat-containing protein 59	Q96AG4	Q96AG4			-0.091718	0.134909	-0.0431913	0.0502516	0.191165	0.176797	0.119113	0.194222	0.815192	0.0115897	0.455258	0.386843	3	3	3	14	14	14	34.93	0	25.025	951930000	28
ISOC1	Isochorismatase domain-containing protein 1	Q96CN7	Q96CN7			NaN	NaN	0	7.66005	7.99867	7.93275	7.94643	7.28716	7.62422	5.09925	5.99454	5.56742	12	12	12	51	51	51	32.236	0	177.87	7353000000	203
OTUB1	Ubiquitin thioesterase OTUB1	Q96FW1;Q96FW1-2	Q96FW1	+		0.0521539	-0.177119	0.124965	0.333974	0.638658	0.375553	0.0368226	-0.193406	0.690696	0.0264467	0.342632	0.141351	8	8	8	35.4	35.4	35.4	31.284	0	62.793	684520000	82
ERO1L	ERO1-like protein alpha	Q96HE7;Q86YB8	Q96HE7			0.0974455	NaN	-0.0974455	-0.106341	0.0429735	-0.331027	-0.339715	NaN	NaN	NaN	-0.35217	-0.191417	4	4	4	9.6	9.6	9.6	54.392	0	29.075	182280000	16
PGAM5	Serine/threonine-protein phosphatase PGAM5, mitochondrial	Q96HS1-2;Q96HS1	Q96HS1-2;Q96HS1			0.202931	-0.232436	0.0295054	-0.0688737	-0.121839	-0.0984109	-0.299873	-0.326953	NaN	0.0942504	NaN	-0.0197824	4	4	4	16.1	16.1	16.1	28.02	0	27.9	271620000	10
CNDP2	Cytosolic non-specific dipeptidase	Q96KP4;Q96KP4-2	Q96KP4;Q96KP4-2			0.0064532	-0.140434	0.13398	0.455672	0.677369	0.551871	0.691954	0.57708	0.824818	0.356246	0.866072	0.611018	9	9	9	25.5	25.5	25.5	52.878	0	71.731	955690000	70
VPS35	Vacuolar protein sorting-associated protein 35	Q96QK1	Q96QK1			0.0165361	0.090793	-0.107329	0.618718	0.54189	0.196927	0.835792	0.497371	0.661502	0.554023	0.522857	0.424125	11	11	11	16.8	16.8	16.8	91.706	0	113.89	1306500000	94
MCCC1	Methylcrotonoyl-CoA carboxylase subunit alpha, mitochondrial	Q96RQ3	Q96RQ3			-0.0487804	-0.128708	0.177488	-0.276152	-1.23484	-0.748219	-0.99139	-0.210297	-0.290541	0.589386	0.0921478	-0.0862064	26	26	26	45.9	45.9	45.9	80.472	0	323.31	19531000000	460
TBCB	Tubulin-folding cofactor B	Q99426-2;Q99426	Q99426-2;Q99426			0.0030117	0.0492191	-0.0522308	0.51412	0.56056	0.81468	0.0994911	-0.747221	0.399948	0.161663	0.44022	0.271526	6	6	6	37.8	37.8	37.8	21.801	0	57.635	921080000	66
PSMD1	26S proteasome non-ATPase regulatory subunit 1	Q99460-2;Q99460	Q99460-2;Q99460			0.191046	-0.0390256	-0.152021	0.401293	0.42076	0.406972	0.475384	0.950509	0.991788	0.570746	0.811166	0.254231	16	16	16	19.3	19.3	19.3	102.26	0	129.45	2466400000	134
PARK7	Protein deglycase DJ-1	Q99497	Q99497			-0.000110626	0.108812	-0.108702	3.76575	4.40354	3.84556	3.73656	3.65651	3.78493	1.70299	2.35214	1.91504	13	13	13	64.6	64.6	64.6	19.891	0	127.04	18025000000	224
VAT1	Synaptic vesicle membrane protein VAT-1 homolog	Q99536;Q99536-3;Q99536-2	Q99536;Q99536-3			0.417292	-0.120081	-0.297211	-0.144371	0.0304813	-0.486713	-0.014452	NaN	0.293716	-0.459375	-0.498266	0.264618	5	5	5	20.1	20.1	20.1	41.92	0	49.256	638640000	18
EIF3C;EIF3CL	Eukaryotic translation initiation factor 3 subunit C;Eukaryotic translation initiation factor 3 subunit C-like protein	Q99613-2;Q99613;B5ME19	Q99613-2;Q99613;B5ME19			-0.161112	0.00496419	0.156148	-0.33796	-0.310811	-0.352107	-0.0525538	0.75953	0.478361	0.176483	1.00215	0.367851	11	11	11	14.8	14.8	14.8	104.1	0	75.889	902080000	60
DNAJC7	DnaJ homolog subfamily C member 7	Q99615-2;Q99615	Q99615-2;Q99615			-0.099975	-0.147243	0.247218	0.461646	0.428712	0.212544	0.885653	0.882554	0.262129	0.275389	0.303757	0.685675	9	9	9	23.7	23.7	23.7	50.096	0	61.852	526970000	38
HSD17B10	3-hydroxyacyl-CoA dehydrogenase type-2	Q99714;Q99714-2	Q99714;Q99714-2			0.19326	-0.0959682	-0.0972919	0.521248	0.91297	1.08748	0.275608	0.408901	1.20485	0.959801	0.649681	0.464209	5	5	5	31.4	31.4	31.4	26.923	0	44.447	699210000	50
HNRNPAB	Heterogeneous nuclear ribonucleoprotein A/B	Q99729-3;Q99729-2;Q99729-4;Q99729	Q99729-3;Q99729-2;Q99729-4;Q99729			0.000216802	-0.0821807	0.0819639	-0.383961	-0.337491	-0.531588	NaN	-0.090306	NaN	-1.31042	-0.200539	0.286495	3	3	3	12.3	12.3	12.3	30.588	0	21.214	512810000	22
ACO2	Aconitate hydratase, mitochondrial	Q99798	Q99798			0.11856	-0.149415	0.0308558	0.291751	0.591254	0.621518	0.553431	0.556737	0.199465	-0.246822	0.576258	0.48375	6	6	6	9.5	9.5	9.5	85.424	0	37.502	427390000	17
CPNE1	Copine-1	Q99829	Q99829			-0.22248	0.306391	-0.0839113	0.48931	0.761738	0.462796	1.33229	0.741164	0.724375	0.694268	NaN	0.667966	4	4	4	6.9	6.9	6.9	59.058	0	28.052	338230000	37
CCT7	T-complex protein 1 subunit eta	Q99832;Q99832-3;Q99832-4;Q99832-2	Q99832;Q99832-3;Q99832-4;Q99832-2			0.0263106	-0.00667508	-0.0196355	0.276431	0.468362	0.200839	0.458756	0.785916	0.583989	0.299523	0.608216	0.233721	17	17	17	37.2	37.2	37.2	59.366	0	137.57	4339900000	195
PRMT1	Protein arginine N-methyltransferase 1	Q99873-2;Q99873-3;Q99873;Q99873-5;Q9NR22-2;Q9NR22	Q99873-2;Q99873-3;Q99873			0.0254803	0.187881	-0.213362	0.358606	0.582621	0.379875	0.602961	0.926895	0.828852	0.52894	0.677475	0.184473	9	9	9	25.1	25.1	25.1	39.928	0	89.053	2501200000	100
ELAC2	Zinc phosphodiesterase ELAC protein 2	Q9BQ52-4;Q9BQ52;Q9BQ52-3;Q9BQ52-2	Q9BQ52-4;Q9BQ52;Q9BQ52-3;Q9BQ52-2			-0.463799	0.241266	0.222532	0.881832	0.516027	0.0112629	0.697111	1.13153	1.26187	1.16665	1.03786	0.595774	6	6	6	10.2	10.2	10.2	87.563	0	51.306	413950000	39
C19orf43	Uncharacterized protein C19orf43	Q9BQ61	Q9BQ61			NaN	0	NaN	-0.0633545	-0.817551	-0.117315	-0.602301	0.171181	NaN	-0.123812	NaN	1.20085	2	2	2	13.1	13.1	13.1	18.419	0	12.301	68121000	10
MYBBP1A	Myb-binding protein 1A	Q9BQG0;Q9BQG0-2	Q9BQG0;Q9BQG0-2			-0.192896	-0.383604	0.5765	0.977926	0.686995	0.230183	0.0733871	0.678932	0.542877	0.653172	0.742386	0.185221	8	8	8	6.3	6.3	6.3	148.85	0	57.8	334190000	48
ESYT1	Extended synaptotagmin-1	Q9BSJ8;Q9BSJ8-2	Q9BSJ8;Q9BSJ8-2			-0.0549278	NaN	0.0549278	0.845778	-0.0423965	0.229111	-0.0345821	0.46419	0.436972	0.460302	0.146366	0.141264	5	5	5	5.5	5.5	5.5	122.85	0	35.234	295370000	31
MCMBP	Mini-chromosome maintenance complex-binding protein	Q9BTE3-2;Q9BTE3;Q9BTE3-3	Q9BTE3-2;Q9BTE3			0.338991	-0.491186	0.152195	0.0103436	-1.00377	-0.41687	-0.653996	-0.466135	NaN	NaN	NaN	-0.849203	3	3	3	6.4	6.4	6.4	72.748	0	22.46	150080000	28
TBCD	Tubulin-specific chaperone D	Q9BTW9;Q9BTW9-4;Q9BTW9-5;Q9BTW9-3	Q9BTW9;Q9BTW9-4;Q9BTW9-5			NaN	0.146063	-0.146063	0.850481	0.60528	0.0394268	0.675276	0.0405369	1.24392	0.708309	0.841852	0.599779	7	7	7	7.5	7.5	7.5	132.6	0	46.005	357380000	24
TUBB6	Tubulin beta-6 chain	Q9BUF5	Q9BUF5			NaN	0.130396	-0.130396	0.925262	0.745131	0.669079	0.89349	0.241199	0.994345	-0.113075	NaN	NaN	13	4	4	35.9	15.5	15.5	49.857	0	28.181	269930000	20
HNRNPUL1	Heterogeneous nuclear ribonucleoprotein U-like protein 1	Q9BUJ2-4;Q9BUJ2-2;Q9BUJ2;Q9BUJ2-3;Q9BUJ2-5	Q9BUJ2-4;Q9BUJ2-2;Q9BUJ2;Q9BUJ2-3			-0.0110614	0.106504	-0.0954425	NaN	0.11985	-0.832377	-0.448689	-0.792308	NaN	NaN	-0.13065	-0.13577	4	4	4	5.6	5.6	5.6	84.793	0	23.071	105600000	9
ACAT2	Acetyl-CoA acetyltransferase, cytosolic	Q9BWD1;Q9BWD1-2	Q9BWD1;Q9BWD1-2			-0.114952	-0.103657	0.218609	1.89712	1.98241	1.85629	1.84058	1.94991	2.26479	1.0377	1.14921	0.612801	10	10	10	36	36	36	41.35	0	140.53	4890400000	139
RBM4;RBM4B	RNA-binding protein 4;RNA-binding protein 4B	Q9BWF3;Q9BWF3-4;Q9BQ04;Q9BWF3-3;Q9BWF3-2;Q96PK6-5	Q9BWF3;Q9BWF3-4;Q9BQ04;Q9BWF3-3;Q9BWF3-2			0.193096	-0.196858	0.00376256	-0.459839	0.00104459	-0.223387	0.168321	NaN	-0.00161616	NaN	NaN	0.194288	4	4	4	11.8	11.8	11.8	40.313	0	24.649	189730000	19
NAA15	N-alpha-acetyltransferase 15, NatA auxiliary subunit	Q9BXJ9;Q9BXJ9-4;Q6N069-5;Q6N069-4;Q6N069-3;Q6N069-2;Q6N069	Q9BXJ9;Q9BXJ9-4			0.0477854	-0.02185	-0.0259355	-0.311242	-0.0207361	-0.276412	0.514323	0.401757	0.075442	0.0116374	0.388234	-0.300538	7	7	7	7.7	7.7	7.7	101.27	0	47.757	351500000	38
API5	Apoptosis inhibitor 5	Q9BZZ5-3;Q9BZZ5-2;Q9BZZ5;Q9BZZ5-6;Q9BZZ5-5;Q9BZZ5-1	Q9BZZ5-3;Q9BZZ5-2;Q9BZZ5;Q9BZZ5-6;Q9BZZ5-5			0.167566	0.234905	-0.402472	-0.289351	-0.225159	0.0565662	0.399364	0.0626411	-0.180315	-0.130787	0.348648	-0.0159874	6	6	6	14.6	14.6	14.6	50.309	0	43.857	791630000	58
XRN2	5-3 exoribonuclease 2	Q9H0D6-2;Q9H0D6	Q9H0D6-2;Q9H0D6			-0.302706	0.274555	0.0281518	-0.37642	0.324645	0.299806	-0.0822913	NaN	NaN	0.326808	NaN	0.119834	2	2	2	3.4	3.4	3.4	99.96	0	16.982	120270000	14
PNN	Pinin	Q9H307	Q9H307			-0.422246	-0.211524	0.633771	-0.659858	-0.889264	-0.870635	-1.16427	-1.19222	NaN	NaN	NaN	-0.604686	3	3	3	4.3	4.3	4.3	81.627	0	19.272	90647000	12
BOLA2	BolA-like protein 2	Q9H3K6-2;Q9H3K6	Q9H3K6-2;Q9H3K6			0.348624	-0.372314	0.0236899	0.326045	0.534043	0.445103	0.631488	0.964184	0.498053	-0.148273	0.870402	0.142398	4	4	4	70.7	70.7	70.7	6.8417	0	50.774	505210000	53
TMX1	Thioredoxin-related transmembrane protein 1	Q9H3N1	Q9H3N1			-0.242273	-0.149684	0.391957	-0.354513	NaN	NaN	-0.388599	NaN	0.257498	-0.0232957	NaN	0.286853	5	5	5	17.9	17.9	17.9	31.791	0	40.842	259440000	39
UNC45A	Protein unc-45 homolog A	Q9H3U1-2;Q9H3U1;Q9H3U1-3	Q9H3U1-2;Q9H3U1			0.0559756	0.177012	-0.232988	-0.109142	0.0381991	-0.349599	0.343955	-0.169635	0.39231	-0.0678094	0.496604	-0.036836	12	12	12	14.1	14.1	14.1	101.67	0	82.378	462530000	42
RNPEP	Aminopeptidase B	Q9H4A4	Q9H4A4			-0.242639	0.0711562	0.171483	0.744307	0.387686	0.248988	0.152661	0.881863	0.704192	0.395281	0.260312	0.612326	9	9	9	15.7	15.7	15.7	72.595	0	76.103	661870000	64
XPO5	Exportin-5	Q9HAV4	Q9HAV4			0.266779	-0.165558	-0.101221	0.05373	0.317175	0.0199203	-0.475727	NaN	-0.673264	0.250093	NaN	0.181995	8	8	8	5.6	5.6	5.6	136.31	0	43.765	354220000	20
GLOD4	Glyoxalase domain-containing protein 4	Q9HC38-2;Q9HC38;Q9HC38-3	Q9HC38-2;Q9HC38			-0.299191	0.155313	0.143878	0.341981	0.630119	0.538116	0.505285	0.742273	0.704221	0.907668	0.910587	0.49467	6	6	6	22.5	22.5	22.5	33.232	0	44.171	714140000	52
ISYNA1	Inositol-3-phosphate synthase 1	Q9NPH2-2;Q9NPH2-3;Q9NPH2	Q9NPH2-2;Q9NPH2-3;Q9NPH2			0.403989	-0.0326392	-0.37135	-0.464938	-0.117873	-0.814086	-0.0150611	0.204851	-0.682257	-0.510165	-0.230626	-0.0474459	7	7	7	17.4	17.4	17.4	47.146	0	60.489	934220000	75
RTN4	Reticulon-4	Q9NQC3-2;Q9NQC3-5;Q9NQC3;Q9NQC3-3;Q9NQC3-4;Q9NQC3-6	Q9NQC3-2;Q9NQC3-5;Q9NQC3;Q9NQC3-3;Q9NQC3-4;Q9NQC3-6			-0.932078	NaN	0.932078	1.91404	2.47431	1.82145	1.38297	2.16778	2.32609	0.243608	1.10554	1.12668	7	7	7	28.7	28.7	28.7	40.317	0	51.51	1030700000	55
XPNPEP1	Xaa-Pro aminopeptidase 1	Q9NQW7-2;Q9NQW7;Q9NQW7-4;Q9NQW7-3	Q9NQW7-2;Q9NQW7;Q9NQW7-4;Q9NQW7-3			0.0341015	0.0449772	-0.0790787	-0.0350418	0.0282764	-0.283756	0.469622	0.657211	0.932878	0.381548	0.700018	-0.330908	3	3	3	5.7	5.7	5.7	67.226	0	22.035	243710000	31
TOMM22	Mitochondrial import receptor subunit TOM22 homolog	Q9NS69	Q9NS69			-0.117455	-0.142941	0.260395	0.527813	-0.413164	0.0529308	NaN	1.49333	1.77492	1.75407	0.674252	0.626837	2	2	2	22.5	22.5	22.5	15.521	0	19.821	318290000	18
FARSB	Phenylalanine--tRNA ligase beta subunit	Q9NSD9;Q9NSD9-2	Q9NSD9;Q9NSD9-2			0.0289103	-0.0781034	0.0491931	0.609305	0.596194	0.234503	0.670561	0.273743	0.526078	0.792243	0.826539	0.554167	9	9	9	14.6	14.6	14.6	66.115	0	58.907	563440000	58
SMC4	Structural maintenance of chromosomes protein 4	Q9NTJ3;Q9NTJ3-2	Q9NTJ3;Q9NTJ3-2			0.177259	-0.124846	-0.0524139	-0.512083	0.0845585	-0.935013	-0.187359	0.101097	NaN	0.663479	-0.297251	0.273874	8	8	8	6.4	6.4	6.4	147.18	0	50.017	357670000	42
OLA1	Obg-like ATPase 1	Q9NTK5;Q9NTK5-2;Q9NTK5-3	Q9NTK5;Q9NTK5-2			-0.210552	0.121231	0.0893211	0.548138	0.513411	0.420156	0.895838	0.976858	1.56109	0.906569	1.13337	0.703615	6	6	6	17.9	17.9	17.9	44.743	0	43.98	456390000	44
2020-09-11	Septin-11	Q9NVA2;Q9NVA2-2;Q14141-2;Q14141-4;Q14141;Q14141-3;Q92599-3;Q92599-2;Q92599-4;Q92599	Q9NVA2;Q9NVA2-2			0.0310491	-0.0866763	0.0556272	0.130639	0.356637	0.188478	0.219602	-0.279963	-0.467261	-0.210471	0.0345167	0.401792	7	7	7	21	21	21	49.398	0	51.251	374180000	42
DPP3	Dipeptidyl peptidase 3	Q9NY33-4;Q9NY33;Q9NY33-2	Q9NY33-4;Q9NY33			0.0869319	-0.0904783	0.0035464	-0.152467	0.0872637	-0.120782	-0.178922	NaN	-0.192571	-0.22142	0.0877196	0.236378	3	3	3	4.5	4.5	4.5	79.306	0	18.762	182680000	19
BCLAF1	Bcl-2-associated transcription factor 1	Q9NYF8-3;Q9NYF8-2;Q9NYF8;Q9NYF8-4	Q9NYF8-3;Q9NYF8-2;Q9NYF8;Q9NYF8-4			-0.242034	-0.254981	0.497016	-0.712781	-0.861007	-1.19833	-1.22407	-0.811649	-1.49266	0.824519	0.887253	1.36559	9	9	9	12.7	12.7	12.7	100.23	0	77.505	803810000	51
CDK12	Cyclin-dependent kinase 12	Q9NYV4-2;Q9NYV4;Q9NYV4-3	Q9NYV4-2;Q9NYV4;Q9NYV4-3			0	NaN	NaN	3.41651	3.31261	3.5617	2.85141	2.32202	2.34337	0.790815	1.19874	1.59634	20	20	18	16.6	16.6	14.9	163.23	0	151.64	1975300000	122
TECR	Very-long-chain enoyl-CoA reductase	Q9NZ01;Q9NZ01-2	Q9NZ01			0.042841	-0.124352	0.0815105	0.111219	0.49608	0.659771	NaN	-0.392347	NaN	NaN	NaN	0.563656	6	6	6	18.8	18.8	18.8	36.034	0	37.077	264730000	21
IGF2BP1	Insulin-like growth factor 2 mRNA-binding protein 1	Q9NZI8;Q9NZI8-2;Q9Y6M1-5;Q9Y6M1-6;Q9Y6M1-3;Q9Y6M1-4;Q9Y6M1-1;Q9Y6M1	Q9NZI8;Q9NZI8-2			0.0412051	-0.0517095	0.0105044	-0.0036157	-0.08402	0.0516993	-0.04264	-0.334998	0.385277	0.186688	0.61666	0.24453	13	13	12	26.5	26.5	24.3	63.48	0	100.68	1463500000	121
HACD3	Very-long-chain (3R)-3-hydroxyacyl-CoA dehydratase 3	Q9P035;Q9P035-2	Q9P035;Q9P035-2			0.0168648	-0.29142	0.274555	1.25003	0.590847	0.752756	1.13976	1.55278	1.53473	1.33776	1.32304	1.12145	6	6	6	19.6	19.6	19.6	43.159	0	62.478	1262600000	94
VAPA	Vesicle-associated membrane protein-associated protein A	Q9P0L0;Q9P0L0-2;O95292-2;O95292	Q9P0L0;Q9P0L0-2			-0.366604	0.123419	0.243185	-0.0268478	0.401646	-0.126041	0.17642	-0.044775	0.609657	0.0580292	0.059515	-0.0512543	4	4	4	21.7	21.7	21.7	27.893	0	30.741	487160000	25
RCC2	Protein RCC2	Q9P258	Q9P258			-0.181711	-0.24044	0.42215	-0.0578492	-0.121496	-0.474199	-0.547086	-0.292158	-0.613378	0.0989825	-0.0378888	0.164687	6	6	6	18	18	18	56.084	0	41.06	615510000	42
LARS	Leucine--tRNA ligase, cytoplasmic	Q9P2J5;Q9P2J5-2;Q9P2J5-3	Q9P2J5;Q9P2J5-2			-0.0703271	0.308816	-0.238489	-0.0967153	0.175889	0.0131594	0.183165	0.650555	0.607459	0.137294	0.508961	-0.180343	8	8	8	7.5	7.5	7.5	134.46	0	51.894	719260000	59
SAE1	SUMO-activating enzyme subunit 1;SUMO-activating enzyme subunit 1, N-terminally processed	Q9UBE0;Q9UBE0-2;Q9UBE0-3	Q9UBE0;Q9UBE0-2;Q9UBE0-3			0.0124035	-0.023283	0.0108795	0.625994	0.638359	0.484413	0.244625	1.32866	0.763126	0.0636292	0.814236	0.547886	10	10	10	29.8	29.8	29.8	38.449	0	70.676	788290000	66
VPS29	Vacuolar protein sorting-associated protein 29	Q9UBQ0;Q9UBQ0-2	Q9UBQ0;Q9UBQ0-2			NaN	0.000606537	-0.000606537	0.521152	-0.116199	NaN	0.501856	0.0281467	-0.295849	NaN	-0.637615	0.0250587	4	4	4	22	22	22	20.505	0	24.031	152650000	14
EIF3K	Eukaryotic translation initiation factor 3 subunit K	Q9UBQ5-2;Q9UBQ5	Q9UBQ5-2;Q9UBQ5			-0.133635	NaN	0.133635	NaN	0.253618	-0.141314	-0.208496	0.288914	0.294712	NaN	0.112228	NaN	2	2	2	11.8	11.8	11.8	24.484	0	14.351	279450000	20
CTSZ	Cathepsin Z	Q9UBR2	Q9UBR2			NaN	NaN	0	5.20982	5.91252	5.78322	5.64573	4.4466	4.60587	2.85565	3.45135	3.26317	4	4	4	12.9	12.9	12.9	33.868	0	52.587	2562000000	59
UBA2	SUMO-activating enzyme subunit 2	Q9UBT2;Q9UBT2-2	Q9UBT2;Q9UBT2-2			-0.0397339	-0.157719	0.197453	0.568304	0.622635	0.653688	0.606289	0.872538	0.599663	0.585966	0.0957146	0.422064	10	10	10	18.9	18.9	18.9	71.223	0	66.901	1114100000	78
TES	Testin	Q9UGI8-2;Q9UGI8	Q9UGI8-2;Q9UGI8			0.00369453	-0.0234108	0.0197163	-0.238758	0.134527	0.0645771	-1.17183	-0.000976562	NaN	-0.238207	-1.90104	-0.313437	7	7	7	16.5	16.5	16.5	46.91	0	51.437	279890000	55
SRP68	Signal recognition particle subunit SRP68	Q9UHB9-4;Q9UHB9;Q9UHB9-2;Q9UHB9-3	Q9UHB9-4;Q9UHB9;Q9UHB9-2;Q9UHB9-3			0.0243518	-0.138303	0.113951	0.0623042	-0.00755056	0.300168	-0.120616	-1.12972	-0.729598	0.0960032	-0.09629	-0.0249189	7	7	7	13.2	13.2	13.2	66.107	0	45.127	328770000	53
CHORDC1	Cysteine and histidine-rich domain-containing protein 1	Q9UHD1-2;Q9UHD1	Q9UHD1-2;Q9UHD1			-0.0440305	0.0712172	-0.0271867	0.154555	0.242194	0.102429	0.453478	-0.314428	0.174191	0.0473239	0.889607	0.129887	7	7	7	30.4	30.4	30.4	35.286	0	50.153	644960000	36
2020-09-09	Septin-9	Q9UHD8-7;Q9UHD8-2;Q9UHD8-5;Q9UHD8;Q9UHD8-3;Q9UHD8-4;Q9UHD8-9;Q9UHD8-8	Q9UHD8-7;Q9UHD8-2;Q9UHD8-5;Q9UHD8;Q9UHD8-3;Q9UHD8-4;Q9UHD8-9;Q9UHD8-8			-0.052283	-0.233432	0.285714	0.551925	0.733287	0.496108	1.04576	0.256231	NaN	-0.0541732	-0.109364	0.344987	9	9	9	18.2	18.2	18.2	63.502	0	59.488	598600000	54
NUDT5	ADP-sugar pyrophosphatase	Q9UKK9	Q9UKK9			0.132152	0.497941	-0.630093	-0.218997	0.616687	-0.189044	0.749652	0.433961	0.222967	0.220968	0.721752	0.0853399	11	11	11	52.1	52.1	52.1	24.327	0	83.062	1141400000	67
HECTD1	E3 ubiquitin-protein ligase HECTD1	Q9ULT8	Q9ULT8			-0.0126381	NaN	0.0126381	-0.651518	NaN	-0.0804558	NaN	0.236568	NaN	-0.00906754	-0.678787	-0.244835	2	2	2	1	1	1	289.38	0	12.786	25725000	4
MYO6	Unconventional myosin-VI	Q9UM54-5;Q9UM54-2;Q9UM54-6;Q9UM54-4;Q9UM54-1;Q9UM54	Q9UM54-5;Q9UM54-2;Q9UM54-6;Q9UM54-4;Q9UM54-1;Q9UM54			0	NaN	NaN	0.675831	0.524652	0.864313	0.819649	NaN	NaN	1.69348	1.08232	0.550894	5	5	5	5.4	5.4	5.4	145.04	0	30.699	189360000	17
MAGED2	Melanoma-associated antigen D2	Q9UNF1;Q9UNF1-2;Q9Y5V3;Q9Y5V3-2	Q9UNF1;Q9UNF1-2			-0.155401	0.191278	-0.0358772	0.0865421	-0.134056	-0.22225	-0.0494747	NaN	NaN	0.199772	0.493185	0.0865574	6	6	6	16.5	16.5	16.5	64.953	0	53.484	280120000	34
PSMD13	26S proteasome non-ATPase regulatory subunit 13	Q9UNM6;Q9UNM6-2	Q9UNM6;Q9UNM6-2			0.168226	-0.19808	0.0298538	0.364502	0.187393	0.312336	0.0762501	0.261019	0.498089	0.559566	0.41033	-0.0263081	9	9	9	29.5	29.5	29.5	42.945	0	67.899	1145900000	68
SRRM2	Serine/arginine repetitive matrix protein 2	Q9UQ35;Q9UQ35-2;Q9UQ35-3	Q9UQ35;Q9UQ35-2			-0.0680447	-0.337532	0.405577	-0.671061	-0.977823	-0.807749	-1.72552	-0.896353	-0.663813	-0.19799	-0.809261	-0.521564	76	76	76	35.4	35.4	35.4	299.61	0	323.31	37055000000	1057
PA2G4	Proliferation-associated protein 2G4	Q9UQ80;Q9UQ80-2	Q9UQ80;Q9UQ80-2			0.0476017	-0.00216103	-0.0454407	0.178049	0.127094	0.347008	-0.297005	-0.112284	-0.66073	-0.381924	-0.209681	-0.0572281	14	14	14	42.4	42.4	42.4	43.786	0	137.41	2691000000	165
C14orf166	UPF0568 protein C14orf166	Q9Y224	Q9Y224			0.0570634	-0.0315882	-0.0254752	0.37762	0.120204	0.0484327	-0.170016	0.125362	0.645572	0.533775	0.228431	-0.0343825	5	5	5	23	23	23	28.068	0	36.003	540250000	62
RUVBL2	RuvB-like 2	Q9Y230;Q9Y230-2	Q9Y230;Q9Y230-2			0.0810954	0.183854	-0.264949	0.422589	0.638081	0.362805	0.967465	1.11917	1.26461	0.58842	0.815947	0.186537	14	14	14	36.3	36.3	36.3	51.156	0	101.67	1718200000	87
EIF3L	Eukaryotic translation initiation factor 3 subunit L	Q9Y262;Q9Y262-2	Q9Y262;Q9Y262-2			-0.238792	-0.153371	0.392163	0.00305621	-0.489784	0.0678221	-0.174859	-0.127649	0.000446955	-0.0542367	-0.0601667	-0.242299	10	10	10	16.1	16.1	16.1	66.726	0	65.9	591910000	65
RUVBL1	RuvB-like 1	Q9Y265;Q9Y265-2	Q9Y265;Q9Y265-2			0.130445	0.0188135	-0.149258	0.620744	0.959749	0.50529	0.922923	0.766624	1.63376	0.959323	0.724529	0.456397	11	11	11	31.6	31.6	31.6	50.227	0	83.662	1327200000	91
NUDC	Nuclear migration protein nudC	Q9Y266	Q9Y266			0.0925617	0.0853348	-0.177896	-0.605055	-0.409533	-0.550463	-0.648403	-0.696039	-0.943657	-0.829115	NaN	-0.297123	8	8	8	26.6	26.6	26.6	38.242	0	60.558	889630000	64
VDAC3	Voltage-dependent anion-selective channel protein 3	Q9Y277;Q9Y277-2	Q9Y277;Q9Y277-2			0.317082	-0.0979684	-0.219114	1.35233	1.27056	1.3727	1.80877	1.67882	2.30424	1.62862	1.83763	1.68972	8	8	8	36.4	36.4	36.4	30.658	0	89.982	2369400000	69
DRG1	Developmentally-regulated GTP-binding protein 1	Q9Y295	Q9Y295			0.0466296	-0.12659	0.0799605	0.342885	0.0641295	0.196414	0.303776	-0.195844	NaN	0.123658	0.304	0.15539	5	5	4	16.1	16.1	14.2	40.542	0	41.546	239810000	15
EPB41L3	Band 4.1-like protein 3;Band 4.1-like protein 3, N-terminally processed	Q9Y2J2-2;Q9Y2J2-4;Q9Y2J2;Q9Y2J2-3	Q9Y2J2-2;Q9Y2J2-4;Q9Y2J2			-0.159928	0.0916684	0.0682596	0.0134633	0.0667585	-0.0224253	0.0570405	NaN	0.312543	NaN	-0.443181	-0.125882	6	6	5	9.8	9.8	9	96.513	0	42.431	254830000	16
LUC7L2	Putative RNA-binding protein Luc7-like 2	Q9Y383;Q96HJ9-2;Q9Y383-3;Q9Y383-2	Q9Y383;Q96HJ9-2;Q9Y383-3;Q9Y383-2			-0.0779775	-0.123966	0.201943	-1.00895	-0.758989	-0.84571	-0.841705	-1.38586	-0.989509	-0.314844	0.114867	0.233946	9	9	6	24	24	16.3	46.513	0	96.22	676310000	80
STRAP	Serine-threonine kinase receptor-associated protein	Q9Y3F4;Q9Y3F4-2	Q9Y3F4;Q9Y3F4-2			0.0136655	0.0842164	-0.097882	0.228277	0.471582	0.281907	0.237558	0.464172	0.657613	-0.106146	0.276157	0.177795	12	12	12	44.3	44.3	44.3	38.438	0	105.01	2387400000	111
RTCB	tRNA-splicing ligase RtcB homolog	Q9Y3I0	Q9Y3I0			-0.125103	0.0682201	0.0568829	0.0913849	0.364918	0.16523	0.30994	1.25671	0.868286	0.579926	0.837147	0.333593	12	12	12	29.1	29.1	29.1	55.21	0	80.587	1336300000	81
RPL36	60S ribosomal protein L36	Q9Y3U8	Q9Y3U8			0.282338	0.0476748	-0.330013	-0.170616	-0.240917	-0.881627	-0.616281	-1.12939	-1.21707	-1.08098	-0.343944	-0.499603	7	7	7	40	40	40	12.254	0	95.576	17337000000	283
TLN1	Talin-1	Q9Y490;Q9Y4G6	Q9Y490			0.135949	0.095054	-0.231003	-0.467169	-0.485673	-0.503121	-0.317029	-0.778935	-0.35991	-0.0286242	-0.325232	-0.134684	46	46	46	24.4	24.4	24.4	269.76	0	323.31	4198800000	372
HYOU1	Hypoxia up-regulated protein 1	Q9Y4L1;Q9Y4L1-2	Q9Y4L1;Q9Y4L1-2			-0.0573057	0.15331	-0.0960039	-0.249687	0.573828	0.362301	-0.25341	-0.953653	0.341113	NaN	-0.047643	0.18768	4	4	4	5.1	5.1	5.1	111.33	0	26.561	274220000	37
SAMM50	Sorting and assembly machinery component 50 homolog	Q9Y512	Q9Y512			0.0695534	0.131098	-0.200651	0.66391	0.196558	0.289497	0.862581	0.891998	1.29506	0.898104	0.648432	1.21399	6	6	6	11.7	11.7	11.7	51.976	0	36.611	314770000	20
SUPT16H	FACT complex subunit SPT16	Q9Y5B9	Q9Y5B9			-0.112955	0.16588	-0.0529251	-0.0240211	-0.639853	-0.0379963	0.48735	0.370848	0.48089	-0.563232	0.337742	-0.299477	11	11	11	12.1	12.1	12.1	119.91	0	83.834	1045000000	61
PSAT1	Phosphoserine aminotransferase	Q9Y617;Q9Y617-2	Q9Y617;Q9Y617-2			-0.0929852	0.0854816	0.00750351	1.0495	0.834158	0.743671	1.02677	0.981159	1.12153	1.04224	0.734606	0.195028	8	8	8	22.7	22.7	22.7	40.422	0	64.818	1158900000	75
COPG1	Coatomer subunit gamma-1	Q9Y678	Q9Y678			0.147685	0.0161044	-0.163789	1.27489	0.14728	-0.577585	0.811982	1.92297	-0.594049	-0.00662549	-0.303148	-0.232776	6	6	5	8	8	6.6	97.717	0	37.871	323610000	22
CLIC4	Chloride intracellular channel protein 4	Q9Y696	Q9Y696			-0.304288	0.178766	0.125522	0.654331	0.429294	-0.00693957	-0.0136801	-0.0596739	0.43313	0.676008	NaN	0.325572	3	3	3	19	19	19	28.772	0	27.97	306020000	23
SAR1B	GTP-binding protein SAR1b	Q9Y6B6	Q9Y6B6			NaN	0.00769615	-0.00769615	-0.053957	-0.0352249	NaN	0.135313	NaN	NaN	-0.0436783	-0.480909	-0.171127	2	2	1	11.1	11.1	5.6	22.41	0	17.105	411940000	22
BZW2	Basic leucine zipper and W2 domain-containing protein 2	Q9Y6E2;Q9Y6E2-2	Q9Y6E2			-0.075757	NaN	0.075757	0.264815	0.0944815	0.0566816	-0.025527	NaN	NaN	-0.446439	NaN	0.00263309	3	2	2	6.4	4.8	4.8	48.162	0	13.307	74484000	5

## Sheet: Conc. MT16-205 30nM, 3h
Gene names	Protein names	Protein IDs (Uniprot accession)	Majority protein IDs (Uniprot accession)	DUBs	ALDHs	Log2 intensity values									N: Peptides	N: Razor + unique peptides	N: Unique peptides	N: Sequence coverage [%]	N: Unique + razor sequence coverage [%]	N: Unique sequence coverage [%]	N: Mol. weight [kDa]	N: Q-value	N: Score	N: Intensity	N: MS/MS count
						DMSO (1)	DMSO (2)	DMSO (3)	DMSO (4)	DMSO (5)	DMSO (6)	MT16-205 30 nM, 3 h (1)	MT16-205 30 nM, 3 h (2)	MT16-205 30 nM, 3 h (3)
AAMDC	Mth938 domain-containing protein	Q9H7C9;Q9H7C9-3;Q9H7C9-2	Q9H7C9;Q9H7C9-3;Q9H7C9-2			-0.483971	-0.355373	NaN	NaN	0.839344	NaN	-0.937639	-0.583879	NaN	4	4	4	39.3	39.3	39.3	13.332	0	24.575	283150000	8
AARS	Alanine--tRNA ligase, cytoplasmic	P49588;P49588-2	P49588;P49588-2			0.173606	0.0627619	0.0472056	0.150248	-0.0527967	-0.381025	0.146786	0.291659	0.530926	29	29	29	36.1	36.1	36.1	106.81	0	323.31	9568500000	344
AASDHPPT	L-aminoadipate-semialdehyde dehydrogenase-phosphopantetheinyl transferase	Q9NRN7;Q9NRN7-2	Q9NRN7;Q9NRN7-2			-0.0479749	-0.248729	0.142363	-0.33784	0.72106	-0.228879	0.136428	0.0127551	0.0612723	2	2	2	7.4	7.4	7.4	35.776	0	35.126	604530000	26
ABCE1	ATP-binding cassette sub-family E member 1	P61221	P61221			-0.340995	0.186848	NaN	0.183634	-0.174259	0.144772	0.290039	-0.00566635	NaN	9	9	9	19.7	19.7	19.7	67.314	0	69.438	1750400000	44
ABCF1	ATP-binding cassette sub-family F member 1	Q8NE71-2;Q8NE71	Q8NE71-2;Q8NE71			0.189866	-0.206464	0.0752589	0.273595	-0.0253576	-0.306897	-0.170869	0.070893	-0.0356839	11	11	11	17.7	17.7	17.7	91.679	0	111.94	2002500000	80
ABCF2	ATP-binding cassette sub-family F member 2	Q9UG63;Q9UG63-2	Q9UG63;Q9UG63-2			0.128674	NaN	NaN	NaN	-0.502889	0.374215	0.533332	-0.147256	NaN	4	4	4	6.1	6.1	6.1	71.289	0	25.941	341240000	20
ACAA2	3-ketoacyl-CoA thiolase, mitochondrial	P42765	P42765			-0.023831	-0.420334	0.412801	0.694068	-0.47131	-0.191394	0.221118	0.371599	0.886974	12	12	12	36.3	36.3	36.3	41.924	0	136.1	2564100000	65
ACACA	Acetyl-CoA carboxylase 1;Biotin carboxylase	Q13085;Q13085-4;Q13085-2;O00763-3;O00763-2;O00763	Q13085;Q13085-4;Q13085-2			0.134509	-0.347911	0.290458	-0.212499	-0.221334	0.356776	-0.665313	-1.2931	-1.62394	99	99	5	50.4	50.4	3.7	265.55	0	323.31	104570000000	1695
ACADSB	Short/branched chain specific acyl-CoA dehydrogenase, mitochondrial	P45954-2;P45954	P45954-2;P45954			0.372877	0.266912	NaN	NaN	-0.575781	-0.0640073	0.241188	0.671756	NaN	3	3	3	9.7	9.7	9.7	36.025	0	19.564	331440000	6
ACADVL	Very long-chain specific acyl-CoA dehydrogenase, mitochondrial	P49748-2;P49748;P49748-3	P49748-2;P49748;P49748-3			-0.31274	0.141608	NaN	0.511361	-0.428905	0.0886753	0.348946	-0.0591042	NaN	9	9	9	15.8	15.8	15.8	68.058	0	67.436	1105100000	42
ACAT1	Acetyl-CoA acetyltransferase, mitochondrial	P24752;P24752-2	P24752			0.101756	0.116866	-0.150809	0.0778383	-0.0514704	-0.0941817	0.880573	0.773765	0.397172	17	17	17	55.3	55.3	55.3	45.199	0	177.45	4737800000	130
ACAT2	Acetyl-CoA acetyltransferase, cytosolic	Q9BWD1;Q9BWD1-2	Q9BWD1;Q9BWD1-2			0.459848	-0.166089	1.00231	-1.25072	-0.0224158	-0.0229308	0.752694	1.08283	1.25268	11	11	11	42.6	42.6	42.6	41.35	0	143.85	3598300000	126
ACBD3	Golgi resident protein GCP60	Q9H3P7	Q9H3P7			0.205566	0.20009	NaN	-0.127587	-0.532698	0.254629	0.177345	0.140926	NaN	5	5	5	11.9	11.9	11.9	60.593	0	46.11	734850000	32
ACIN1	Apoptotic chromatin condensation inducer in the nucleus	Q9UKV3;Q9UKV3-5;Q9UKV3-3;Q9UKV3-2	Q9UKV3;Q9UKV3-5;Q9UKV3-3;Q9UKV3-2			0.0928392	-1.02403	0.278371	0.505816	0.374297	-0.227294	-0.600984	-0.384902	0.34999	11	11	11	8	8	8	151.86	0	69.995	792940000	45
ACLY	ATP-citrate synthase	P53396;P53396-2;P53396-3	P53396;P53396-2;P53396-3			-0.0145607	-0.339689	0.140406	0.150349	-0.0851231	0.148619	-0.537155	-0.726372	0.145517	34	34	34	36.2	36.2	36.2	120.84	0	323.31	12058000000	363
ACO2	Aconitate hydratase, mitochondrial	Q99798	Q99798			0.0438016	-0.4457	0.225818	0.180948	0.220661	-0.225527	0.1272	-0.043225	0.929296	12	12	12	16.5	16.5	16.5	85.424	0	89.898	2055300000	64
ACOT7	Cytosolic acyl coenzyme A thioester hydrolase	O00154-4;O00154-6;O00154-7;O00154;O00154-5;O00154-2;O00154-3;Q6ZUV0	O00154-4;O00154-6;O00154-7;O00154;O00154-5;O00154-2;O00154-3			-0.148045	0.466953	NaN	-0.478861	0.0628468	0.0971066	0.214269	0.455404	NaN	10	10	10	35.8	35.8	35.8	37.419	0	81.881	2645200000	79
ACP1	Low molecular weight phosphotyrosine protein phosphatase	P24666;P24666-4;P24666-3;P24666-2	P24666;P24666-4;P24666-3;P24666-2			0.270538	0.319	NaN	-0.429281	-0.11487	-0.0453873	0.450602	0.274332	NaN	4	4	4	26.6	26.6	26.6	18.042	0	35.766	808820000	39
ACSL3	Long-chain-fatty-acid--CoA ligase 3	O95573	O95573			0.726777	-0.390406	-0.317029	0.285884	0.366422	-0.671649	0.219945	-0.0745131	0.0236944	8	8	7	14.6	14.6	12.1	80.419	0	61.591	794560000	38
ACTA1;ACTC1;ACTG2;ACTA2	Actin, alpha skeletal muscle;Actin, alpha cardiac muscle 1;Actin, gamma-enteric smooth muscle;Actin, aortic smooth muscle	P68133;P68032;P63267;P62736;P63267-2	P68133;P68032;P63267;P62736;P63267-2			NaN	0.276518	NaN	-0.0104938	-0.268333	0.00230837	0.144373	-1.27817	NaN	17	3	3	40.1	11.7	11.7	42.051	0	94.05	7506200000	80
ACTB	Actin, cytoplasmic 1;Actin, cytoplasmic 1, N-terminally processed	P60709;P0CG38;Q562R1;P0CG39	P60709			-0.171197	0.161715	-0.382711	-0.106557	0.303214	0.195536	0.140998	0.505934	-0.433614	25	25	1	83.5	83.5	4.5	41.736	0	323.31	327290000000	1510
ACTN1	Alpha-actinin-1	P12814-2;P12814;P12814-3;P12814-4	P12814-2;P12814;P12814-3;P12814-4			0.145031	-0.335704	NaN	0.277615	-0.368118	0.281176	-0.224973	-0.238136	NaN	15	5	5	19.2	6.4	6.4	102.71	0	52.824	619390000	34
ACTN4	Alpha-actinin-4	O43707;O43707-2;O43707-3;P35609-2;P35609;Q08043;Q9H254-2;Q9H254-4;Q9H254	O43707;O43707-2			-0.0316175	-0.0117696	-0.633045	0.228238	-0.0144456	0.462639	-0.0176099	-0.0842145	-0.528308	35	35	25	47.1	47.1	34.7	104.85	0	323.31	13709000000	353
ACTR1A	Alpha-centractin	P61163	P61163			0.286761	0.161942	NaN	-0.694366	0.220839	0.0248245	-0.231273	NaN	NaN	4	4	2	16.5	16.5	11.7	42.613	0	50.664	819260000	23
ACTR2	Actin-related protein 2	P61160;P61160-2	P61160;P61160-2			0.139415	0.164293	NaN	-0.0814407	-0.264846	0.0425789	-0.117696	-0.304519	NaN	6	6	6	19.5	19.5	19.5	44.76	0	48.765	1119800000	17
ACTR3	Actin-related protein 3	P61158;Q9P1U1-2;Q9P1U1;Q9P1U1-3	P61158			-0.129634	-0.204383	0.388368	0.11235	0.0164598	-0.183161	0.239822	0.382846	0.987792	8	8	8	22.2	22.2	22.2	47.371	0	60.32	1878100000	54
ADAR	Double-stranded RNA-specific adenosine deaminase	P55265-5;P55265;P55265-4;P55265-3;P55265-2	P55265-5;P55265;P55265-4;P55265-3;P55265-2			0.136878	0.244473	0.520196	-0.446523	0.121344	-0.576368	-0.349485	-0.233186	-0.0651639	12	12	12	14	14	14	103.64	0	81.111	1227800000	55
ADH5	Alcohol dehydrogenase class-3	P11766	P11766			NaN	-0.374706	NaN	NaN	NaN	0.374706	NaN	NaN	NaN	4	4	4	15	15	15	39.724	0	26.257	371370000	14
ADK	Adenosine kinase	P55263-3;P55263;P55263-2;P55263-4	P55263-3;P55263;P55263-2			0.202214	0.223078	NaN	-0.140756	-0.14973	-0.134805	0.528353	0.279398	NaN	5	5	5	16.7	16.7	16.7	34.084	0	32.884	487310000	28
ADRM1	Proteasomal ubiquitin receptor ADRM1	Q16186	Q16186			0.0550205	-0.0437553	NaN	0.0378448	0.188977	-0.238087	0.468612	0.0499622	0.633945	4	4	4	11.8	11.8	11.8	42.153	0	45.468	1126100000	45
ADSL	Adenylosuccinate lyase	P30566;P30566-2	P30566;P30566-2			-0.25764	-0.124973	0.452374	-0.0904477	0.0996787	-0.0789922	-0.136531	0.182063	0.596049	8	8	8	19.6	19.6	19.6	54.889	0	109.08	1747100000	78
ADSS	Adenylosuccinate synthetase isozyme 2	P30520	P30520			0.0535812	0.251825	NaN	-0.50013	0.337145	-0.142422	0.0119648	-0.155432	NaN	7	7	7	19.1	19.1	19.1	50.097	0	60.055	1491300000	49
AFG3L2	AFG3-like protein 2	Q9Y4W6;Q01484-5;Q01484-2;Q01484	Q9Y4W6			0.151307	-0.0652777	0.21808	0.251617	-0.370446	-0.18528	0.166694	0.271074	0.859557	9	9	9	11.4	11.4	11.4	88.583	0	53.867	771090000	12
AGPS	Alkyldihydroxyacetonephosphate synthase, peroxisomal	O00116	O00116			0.244058	-0.391217	NaN	0.281066	-0.127995	-0.00591164	0.235854	0.563682	-0.154414	4	4	4	7.1	7.1	7.1	72.911	0	26.895	405570000	20
AHCY	Adenosylhomocysteinase	P23526;P23526-2	P23526;P23526-2			0.234511	0.0854267	-0.273084	0.32848	-0.306862	-0.0684716	0.0489143	0.08507	-1.35844	17	17	17	42.6	42.6	42.6	47.716	0	265.92	16089000000	271
AHNAK	Neuroblast differentiation-associated protein AHNAK	Q09666	Q09666			0.223757	-0.403444	NaN	0.179686	NaN	NaN	-0.170019	-0.18942	NaN	4	4	4	3.5	3.5	3.5	629.09	0	26.016	410670000	10
AHSA1	Activator of 90 kDa heat shock protein ATPase homolog 1	O95433-2;O95433	O95433-2;O95433			-0.414355	-0.0932662	0.658136	-0.0734641	0.208911	-0.285962	-0.514966	-0.270178	1.19811	9	9	9	40.6	40.6	40.6	32.339	0	70.917	1174800000	32
AIF1L	Allograft inflammatory factor 1-like	Q9BQI0-3;Q9BQI0;Q9BQI0-2;Q9BQI0-4	Q9BQI0-3;Q9BQI0;Q9BQI0-2			NaN	0	NaN	NaN	NaN	NaN	0.430223	0.702883	0.451593	3	3	3	23.9	23.9	23.9	16.183	0	19.021	167660000	4
AIFM1	Apoptosis-inducing factor 1, mitochondrial	O95831-3;O95831;O95831-2;O95831-5;O95831-6;O95831-4	O95831-3;O95831;O95831-2			0.0964193	0.101281	0.269198	-0.206563	0.117583	-0.377919	0.175265	0.308494	0.903817	13	13	13	24.6	24.6	24.6	66.294	0	248.75	2995500000	90
AK2	Adenylate kinase 2, mitochondrial;Adenylate kinase 2, mitochondrial, N-terminally processed	P54819-5;P54819-2;P54819;P54819-3;P54819-6;P54819-4	P54819-5;P54819-2;P54819;P54819-3;P54819-6;P54819-4			0.395524	-0.252393	NaN	0.498189	-0.646437	0.00511665	-0.195916	-0.159577	NaN	6	6	6	33.5	33.5	33.5	24.648	0	37.956	777820000	25
AKR1A1	Alcohol dehydrogenase [NADP(+)]	P14550	P14550			0.416086	0.341467	-0.257048	-0.478138	0.101785	-0.124152	0.0875298	-0.515032	-0.42284	9	9	9	29.2	29.2	29.2	36.573	0	67.023	1412200000	56
AKR1B1	Aldose reductase	P15121;C9JRZ8;C9JRZ8-2	P15121			0.340343	-0.168095	0.181535	0.424455	-0.406466	-0.371773	0.19195	0.208183	0.47907	5	5	5	13.6	13.6	13.6	35.853	0	33.956	2369500000	88
AKR7A2;AKR7L	Aflatoxin B1 aldehyde reductase member 2;Aflatoxin B1 aldehyde reductase member 4	O43488;Q8NHP1;Q8NHP1-3	O43488;Q8NHP1			NaN	0.326752	NaN	-0.56607	0.239318	NaN	0.0787284	0.570107	NaN	4	4	4	13.1	13.1	13.1	39.589	0	28.814	406970000	15
ALDH18A1	Delta-1-pyrroline-5-carboxylate synthase;Glutamate 5-kinase;Gamma-glutamyl phosphate reductase	P54886-2;P54886	P54886-2;P54886		x	0.371713	-0.31804	0.311595	0.377235	-0.47931	-0.263194	0.170461	0.156413	0.653463	13	13	13	16	16	16	87.088	0	99.306	2897600000	131
ALDH1A2	Retinal dehydrogenase 2	O94788;O94788-2;O94788-3;O94788-4	O94788;O94788-2;O94788-3;O94788-4		x	0.640452	0.689324	-1.65119	0.358624	0.24809	-0.2853	6.96405	6.63043	6.58058	23	21	19	46.9	45.2	41.5	56.723	0	323.31	29594000000	378
ALDH1B1	Aldehyde dehydrogenase X, mitochondrial	P30837	P30837		x	0.48886	0.634047	-0.276453	-0.168531	0.747315	-1.42524	8.08592	7.6347	6.59707	24	24	21	45.6	45.6	42.4	57.206	0	323.31	56561000000	505
ALDH2	Aldehyde dehydrogenase, mitochondrial	P05091;P05091-2;P00352	P05091;P05091-2		x	0.153591	0.771682	-0.632235	-0.116558	-0.113253	-0.063227	3.79121	3.87847	2.49888	22	19	19	49.9	46.6	46.6	56.381	0	242.27	10007000000	224
ALDH3A2	Fatty aldehyde dehydrogenase	P51648;P51648-2;P48448;P43353-2;P30838;P43353	P51648;P51648-2		x	0.158137	0.10822	NaN	-0.140968	NaN	-0.125389	1.00036	1.51398	NaN	9	9	9	21.6	21.6	21.6	54.847	0	61.067	1926200000	43
ALDH5A1	Succinate-semialdehyde dehydrogenase, mitochondrial	P51649;P51649-2	P51649;P51649-2		x	0	NaN	NaN	NaN	NaN	NaN	-0.149183	0.378031	-0.0916615	4	4	4	7.9	7.9	7.9	57.214	0	27.638	461220000	11
ALDH7A1	Alpha-aminoadipic semialdehyde dehydrogenase	P49419-2;P49419;P49419-4	P49419-2;P49419;P49419-4		x	0.370143	0.258485	-0.603452	0.114451	0.117909	-0.257535	0.354306	0.62241	0.53332	14	14	14	32.3	32.3	32.3	55.366	0	130.88	4098900000	126
ALDH9A1	4-trimethylaminobutyraldehyde dehydrogenase	P49189;P49189-2;Q93070	P49189;P49189-2		x	0.794747	0.44401	-2.25986	0.678595	0.280619	0.0618862	6.72807	6.45352	6.00497	28	28	28	60.1	60.1	60.1	53.801	0	323.31	66959000000	484
ALDOA	Fructose-bisphosphate aldolase A	P04075;P04075-2;P05062	P04075;P04075-2			-0.107248	0.137217	-0.502086	0.178012	0.270896	0.0232093	-0.249418	-0.357139	-0.751006	22	22	18	70.9	70.9	57.4	39.42	0	323.31	62337000000	582
ANP32A	Acidic leucine-rich nuclear phosphoprotein 32 family member A	P39687;O95626;O43423	P39687			0.343671	0.155714	-0.0149978	-0.0672229	-0.305443	-0.111721	0.0400712	0.265033	NaN	6	6	5	20.1	20.1	14.9	28.585	0	45.139	3234000000	76
ANP32B	Acidic leucine-rich nuclear phosphoprotein 32 family member B	Q92688-2;Q92688	Q92688-2;Q92688			-1.39467	0.426129	NaN	0.0665268	0.638195	0.263821	0.141043	-0.223766	NaN	6	5	5	32.8	26.2	26.2	22.276	0	35.256	2322000000	49
ANXA1	Annexin A1	P04083	P04083			-0.0164111	0.116394	-0.00576242	-0.082991	-0.236111	0.224882	-0.343165	-0.430849	-1.73043	18	18	18	56.9	56.9	56.9	38.714	0	323.31	18909000000	342
ANXA11	Annexin A11	P50995-2;P50995	P50995-2;P50995			0.00192388	0.29655	-0.422461	0.427299	-0.465016	0.161704	0.212201	0.270427	NaN	7	7	7	15	15	15	51.242	0	69.351	1449300000	58
ANXA2;ANXA2P2	Annexin A2;Putative annexin A2-like protein	P07355;P07355-2;A6NMY6	P07355;P07355-2;A6NMY6			-0.107696	0.593898	-0.310615	0.0367095	0.0607554	-0.273052	0.165494	-0.0926011	0.0210063	16	16	16	48.1	48.1	48.1	38.604	0	258.73	11915000000	265
ANXA5	Annexin A5	P08758	P08758			-0.153246	-0.021616	0.317869	-0.649734	0.5907	-0.0839729	-0.216564	-0.110624	-0.242861	18	18	18	68.4	68.4	68.4	35.936	0	323.31	20168000000	403
ANXA6	Annexin A6	P08133;P08133-2	P08133;P08133-2			-0.0934639	0.272995	0.0553551	-0.0434456	0.270658	-0.462099	-0.0563107	0.0839558	0.0733185	25	25	25	44.1	44.1	44.1	75.872	0	215.85	8552500000	183
ANXA7	Annexin A7	P20073-2;P20073	P20073-2;P20073			0.170628	0.123936	-0.180036	0.447047	-0.303335	-0.258239	0.189873	-0.044336	NaN	8	8	8	17	17	17	50.315	0	53.752	1058000000	44
AP1B1	AP-1 complex subunit beta-1	Q10567-4;Q10567-3;Q10567-2;Q10567	Q10567-4;Q10567-3;Q10567-2;Q10567			NaN	-0.529679	NaN	NaN	0.490392	0.0392869	NaN	NaN	0.418691	15	7	7	19.2	9.4	9.4	101.35	0	44.575	1028700000	18
AP1M1	AP-1 complex subunit mu-1	Q9BXS5;Q9BXS5-2;Q9Y6Q5;Q9Y6Q5-2	Q9BXS5;Q9BXS5-2			-0.0512436	0.909322	NaN	-0.925748	0.190705	-0.123036	0.403627	-0.321713	NaN	7	7	7	22	22	22	48.586	0	54.171	764210000	27
AP2B1	AP-2 complex subunit beta	P63010;P63010-2;P63010-3	P63010;P63010-2;P63010-3			0.332023	-0.0253433	-0.270459	-0.0102542	0.0497605	-0.0757278	0.4524	0.391918	-0.0742992	18	18	10	22.8	22.8	13.2	104.55	0	162.4	3943500000	140
AP2M1	AP-2 complex subunit mu	Q96CW1-2;Q96CW1	Q96CW1-2;Q96CW1			0.64505	NaN	-0.230528	0.113911	-0.528433	NaN	-0.049963	NaN	NaN	3	3	3	5.8	5.8	5.8	49.389	0	18.186	256830000	8
AP3B1	AP-3 complex subunit beta-1	O00203-3;O00203;Q13367-3;Q13367;Q13367-4	O00203-3;O00203			0.0852	0.324608	NaN	NaN	-0.409808	NaN	-0.115836	0.328562	NaN	6	6	6	6.9	6.9	6.9	116.19	0	36.928	441400000	10
AP3D1	AP-3 complex subunit delta-1	O14617-4;O14617;O14617-5;O14617-3;O14617-2	O14617-4;O14617;O14617-5;O14617-3;O14617-2			0.261082	-0.00896645	-0.485609	0.00547218	0.211451	0.016571	0.0282631	-0.0889168	NaN	7	7	7	7.3	7.3	7.3	114.71	0	53.635	857530000	41
APEX1	DNA-(apurinic or apyrimidinic site) lyase;DNA-(apurinic or apyrimidinic site) lyase, mitochondrial	P27695	P27695			0.339336	-0.0659542	-0.400764	0.215292	0.13233	-0.22024	0.0759716	0.603758	NaN	9	9	9	34.3	34.3	34.3	35.554	0	78.297	7176400000	78
API5	Apoptosis inhibitor 5	Q9BZZ5-2;Q9BZZ5;Q9BZZ5-3;Q9BZZ5-5;Q9BZZ5-6;Q9BZZ5-1	Q9BZZ5-2;Q9BZZ5;Q9BZZ5-3;Q9BZZ5-5;Q9BZZ5-6;Q9BZZ5-1			-0.589593	0.575055	NaN	-0.305797	-0.0288174	0.349152	0.0921638	-0.177026	NaN	9	9	9	20.2	20.2	20.2	56.769	0	107.88	2323100000	99
APOA1BP	NAD(P)H-hydrate epimerase	Q8NCW5-2;Q8NCW5	Q8NCW5-2;Q8NCW5			NaN	0.548898	NaN	-0.844346	NaN	0.295448	NaN	NaN	NaN	3	3	3	24.3	24.3	24.3	20.43	0	28.343	441360000	23
APRT	Adenine phosphoribosyltransferase	P07741-2;P07741	P07741-2;P07741			0.725422	0.522427	NaN	-1.18223	0.0259285	-0.0915432	0.814732	1.06437	NaN	6	6	6	52.2	52.2	52.2	14.557	0	85.916	2266700000	58
ARCN1	Coatomer subunit delta	P48444;P48444-2	P48444;P48444-2			-0.0594947	-0.269835	-0.103131	0.480281	0.117931	-0.165751	0.0360921	0.22396	0.435714	10	10	10	21.5	21.5	21.5	57.21	0	85.282	2026300000	84
ARF1;ARF3	ADP-ribosylation factor 1;ADP-ribosylation factor 3	P84077;P61204;P61204-2	P84077;P61204;P61204-2			-0.0810649	0.915593	0.150016	-1.95223	0.216102	0.751584	0.931053	0.622529	NaN	7	7	3	53.6	53.6	20.4	20.697	0	72.91	3563100000	87
ARF4	ADP-ribosylation factor 4	P18085	P18085			0.323282	-0.021347	-0.196724	0.171026	-0.203674	-0.0725632	0.019495	0.214163	-0.589018	7	4	4	47.2	19.4	19.4	20.511	0	29.646	670860000	45
ARF5	ADP-ribosylation factor 5	P84085	P84085			0.169934	-0.169934	NaN	NaN	NaN	NaN	-0.0574179	NaN	NaN	6	2	2	43.3	10	10	20.529	0.00075586	14.706	390400000	14
ARHGDIA	Rho GDP-dissociation inhibitor 1	P52565;P52565-2	P52565;P52565-2			-1.20507	0.483168	NaN	0.42191	0.29888	0.00111237	0.285643	-0.0997635	NaN	7	7	7	41.7	41.7	41.7	23.207	0	114.44	4164600000	95
ARHGEF1	Rho guanine nucleotide exchange factor 1	Q92888-2;Q92888;Q92888-3;Q92888-4	Q92888-2;Q92888;Q92888-3;Q92888-4			0.60221	0.236766	-0.341937	NaN	-0.497039	NaN	-0.263116	0.307569	NaN	3	3	3	4.3	4.3	4.3	98.767	0	18.466	421450000	13
ARL6IP4	ADP-ribosylation factor-like protein 6-interacting protein 4	Q66PJ3-7;Q66PJ3-4;Q66PJ3-3;Q66PJ3-2;Q66PJ3;Q66PJ3-5	Q66PJ3-7;Q66PJ3-4;Q66PJ3-3;Q66PJ3-2;Q66PJ3;Q66PJ3-5			0.339486	0.571631	NaN	-0.20503	-0.458833	-0.247255	0.13535	0.451093	NaN	2	2	2	12.4	12.4	12.4	25.348	0	88.596	532810000	32
ARMT1	Protein-glutamate O-methyltransferase	Q9H993	Q9H993			0.133804	-0.294588	0.352779	-0.236966	0.0449711	NaN	-0.157887	1.52588e-06	NaN	4	4	4	13.6	13.6	13.6	51.172	0	31.254	440190000	11
ARPC1A	Actin-related protein 2/3 complex subunit 1A	Q92747;Q92747-2	Q92747;Q92747-2			0.245894	-0.28201	NaN	0.0659855	-0.0585873	0.0287178	-0.200103	0.000231552	NaN	6	6	6	18.4	18.4	18.4	41.569	0	37.293	577310000	18
ARPC2	Actin-related protein 2/3 complex subunit 2	O15144	O15144			NaN	0.232232	-0.478507	0.387709	-0.356878	0.215443	0.575352	0.444728	NaN	7	7	7	19.7	19.7	19.7	34.333	0	49.719	1183700000	28
ARPC3	Actin-related protein 2/3 complex subunit 3	O15145	O15145			0.326561	-0.546602	0.786694	-0.363977	0.0228046	-0.225481	0.432364	-0.23331	0.459383	5	5	5	33.1	33.1	33.1	20.546	0	48.736	979490000	29
ARPC4	Actin-related protein 2/3 complex subunit 4	P59998;P59998-3;P59998-2;P59998-4	P59998;P59998-3;P59998-2;P59998-4			NaN	0.0632477	NaN	-0.334278	NaN	0.27103	-0.157833	NaN	NaN	4	4	4	22.6	22.6	22.6	19.667	0	31.572	650090000	33
ASNS	Asparagine synthetase [glutamine-hydrolyzing]	P08243-2;P08243;P08243-3	P08243-2;P08243;P08243-3			0.494773	0.00732549	0.185476	-0.270051	-0.137921	-0.279603	0.243636	0.15903	-0.290032	12	12	12	26.3	26.3	26.3	62.168	0	89.276	4209200000	109
ATAD3A	ATPase family AAA domain-containing protein 3A	Q9NVI7-2;Q9NVI7	Q9NVI7-2;Q9NVI7			0.631668	-0.0681091	NaN	0.250855	-0.498184	-0.31623	0.065884	0.449711	1.10327	8	8	1	12.8	12.8	1.4	66.217	0	59.123	1010400000	56
ATIC	Bifunctional purine biosynthesis protein PURH;Phosphoribosylaminoimidazolecarboxamide formyltransferase;IMP cyclohydrolase	P31939;P31939-2	P31939;P31939-2			0.233367	0.13853	-0.464966	0.239509	-0.0507247	-0.0957152	0.0666116	0.208812	0.379102	23	23	23	45.3	45.3	45.3	64.615	0	193.99	5854900000	228
ATP1A1	Sodium/potassium-transporting ATPase subunit alpha-1	P05023-4;P05023;P05023-3;P05023-2;P50993;P13637;P13637-2;P13637-3;P20648;P54707;P54707-2	P05023-4;P05023;P05023-3;P05023-2			0.312477	-0.13982	0.100012	0.238184	-0.236891	-0.27396	0.132751	0.199093	0.0429875	20	20	17	20.6	20.6	17.6	113	0	323.31	6733100000	207
ATP2A2	Sarcoplasmic/endoplasmic reticulum calcium ATPase 2	P16615-5;P16615-2;P16615-3;P16615;P16615-4;O14983-2;O14983;O14983-3;Q93084-4;Q93084-2;Q93084-3;Q93084-7;Q93084;Q93084-6;Q93084-5	P16615-5;P16615-2;P16615-3;P16615;P16615-4			0.453147	0.171233	-0.425494	0.0172644	-0.120225	-0.0959253	1.15382	0.981582	0.20618	29	29	29	33.6	33.6	33.6	109.73	0	323.31	18160000000	390
ATP5A1	ATP synthase subunit alpha, mitochondrial	P25705;P25705-2;P25705-3	P25705;P25705-2;P25705-3			0.302036	0.123098	-0.463269	0.312109	-0.334616	0.0606419	0.19741	0.279192	-0.788349	22	22	22	38.7	38.7	38.7	59.75	0	307.96	14394000000	269
ATP5B	ATP synthase subunit beta, mitochondrial	P06576	P06576			0.497352	0.155305	NaN	-0.442643	0.139175	-0.349189	0.396329	0.532712	NaN	15	15	15	39.1	39.1	39.1	56.559	0	131.08	3700700000	120
ATP5C1	ATP synthase subunit gamma, mitochondrial	P36542;P36542-2	P36542;P36542-2			-0.412535	0.0012661	NaN	0.228031	-0.0233807	0.206619	0.0967175	-0.0424255	NaN	7	7	7	24.8	24.8	24.8	32.996	0	59.538	1598500000	56
ATP5F1	ATP synthase F(0) complex subunit B1, mitochondrial	P24539	P24539			-0.345408	-0.185699	0.140384	0.526259	-0.186482	0.0509462	0.384992	0.130794	0.726682	5	5	5	22.3	22.3	22.3	28.908	0	51.091	1471600000	38
ATP5H	ATP synthase subunit d, mitochondrial	O75947;O75947-2	O75947;O75947-2			0.279849	-0.105239	0.0071818	-0.185708	-0.224143	0.22806	0.569432	0.860093	-0.172962	10	10	10	64.6	64.6	64.6	18.491	0	70.51	1879000000	61
ATP5O	ATP synthase subunit O, mitochondrial	P48047	P48047			-0.0949408	-0.223775	-0.173827	0.236232	-0.228266	0.484577	0.455144	0.914283	0.679147	8	8	8	42.3	42.3	42.3	23.277	0	71.634	5189700000	116
ATP6V1A	V-type proton ATPase catalytic subunit A	P38606-2;P38606	P38606-2;P38606			-0.00421492	-0.20276	-0.260517	0.248146	0.15997	0.0593761	0.547253	0.315218	NaN	7	7	7	14.2	14.2	14.2	64.735	0	88.855	1109500000	22
ATP6V1B2	V-type proton ATPase subunit B, brain isoform	P21281;P15313	P21281			0.288317	-0.13446	NaN	0.480822	-0.634678	NaN	-0.873713	0.347679	NaN	3	3	3	7	7	7	56.5	0	25.281	419140000	17
ATXN10	Ataxin-10	Q9UBB4-2;Q9UBB4	Q9UBB4-2;Q9UBB4			0.471406	-0.0488613	NaN	0.242994	-0.577479	-0.0880592	-0.0833786	0.435519	NaN	8	8	8	20.4	20.4	20.4	46.286	0	80.028	840540000	39
ATXN2L	Ataxin-2-like protein	Q8WWM7-6;Q8WWM7-8;Q8WWM7-5;Q8WWM7-4;Q8WWM7-9;Q8WWM7-2;Q8WWM7;Q8WWM7-3;Q8WWM7-7	Q8WWM7-6;Q8WWM7-8;Q8WWM7-5;Q8WWM7-4;Q8WWM7-9;Q8WWM7-2;Q8WWM7;Q8WWM7-3			0.0175088	-0.315083	0.460309	0.424966	-0.487761	-0.09994	-0.175234	-0.155989	0.542724	10	10	10	12.9	12.9	12.9	102.89	0	82.067	1841800000	87
BAG6	Large proline-rich protein BAG6	P46379-2;P46379;P46379-3;P46379-5;P46379-4	P46379-2;P46379;P46379-3;P46379-5;P46379-4			-0.131221	-0.0412743	NaN	0.197591	0.0517147	-0.0768101	-0.0663139	0.001334	NaN	6	6	6	7.5	7.5	7.5	118.69	0	37.085	440270000	9
BANF1	Barrier-to-autointegration factor;Barrier-to-autointegration factor, N-terminally processed	O75531	O75531			NaN	0.4496	NaN	-1.49692	0.356422	0.690898	NaN	NaN	NaN	3	3	3	48.3	48.3	48.3	10.058	0	35.262	604260000	22
BCAP31	B-cell receptor-associated protein 31	P51572;P51572-2	P51572;P51572-2			0.0403904	0.0242447	0.0725044	-0.0128513	-0.124288	NaN	NaN	0.693734	0.470423	3	3	3	13	13	13	27.991	0	19.455	403560000	22
BCLAF1	Bcl-2-associated transcription factor 1	Q9NYF8-2;Q9NYF8;Q9NYF8-3;Q9NYF8-4	Q9NYF8-2;Q9NYF8;Q9NYF8-3;Q9NYF8-4			-0.131382	-0.127373	0.239828	0.289646	-0.149678	-0.121041	0.247741	0.376381	0.104635	26	26	25	29.1	29.1	27.9	105.95	0	323.31	14165000000	310
BLMH	Bleomycin hydrolase	Q13867	Q13867			-2.05632	0.162802	NaN	0.988522	0.922381	-0.0173889	-0.370311	-1.52643	NaN	5	5	5	15.2	15.2	15.2	52.562	0	43.271	1067600000	22
BLVRA	Biliverdin reductase A	P53004	P53004			0.318433	0.0113386	0.163204	0.464839	-0.712784	-0.24503	0.248731	0.242566	0.357799	6	6	6	20.9	20.9	20.9	33.428	0	47.921	1692100000	56
BLVRB	Flavin reductase (NADPH)	P30043	P30043			0.435252	-0.208226	NaN	-0.203805	0.0208443	-0.0440647	-0.0099041	0.810101	NaN	2	2	2	11.7	11.7	11.7	22.119	0.00078431	16.287	382560000	13
BOLA2	BolA-like protein 2	Q9H3K6;Q9H3K6-2	Q9H3K6;Q9H3K6-2			0.196158	0.517716	NaN	-1.1738	0.169993	0.289931	0.647696	-0.310594	NaN	3	3	3	39.5	39.5	39.5	10.116	0	87.072	1465100000	34
BRAT1	BRCA1-associated ATM activator 1	Q6PJG6;Q6PJG6-2;Q6PJG6-3	Q6PJG6			NaN	NaN	NaN	-0.0125039	-0.158904	0.171408	0.303265	0.476662	NaN	5	5	5	6.2	6.2	6.2	88.118	0	34.651	348290000	15
BUB3	Mitotic checkpoint protein BUB3	O43684-2;O43684	O43684-2;O43684			0.463691	0.095815	-0.642848	0.283956	-0.275231	0.0746168	0.152122	0.322059	0.154773	10	10	10	35	35	35	36.954	0	130.41	3139700000	108
BZW1	Basic leucine zipper and W2 domain-containing protein 1	Q7L1Q6-2;Q7L1Q6;Q7L1Q6-4;Q7L1Q6-3	Q7L1Q6-2;Q7L1Q6;Q7L1Q6-4;Q7L1Q6-3			0.378841	0.0566018	0.0290407	0.155319	-0.440781	-0.179021	0.133231	0.729715	0.667527	8	8	7	19.8	19.8	17.8	40.538	0	55.542	1602800000	64
BZW2	Basic leucine zipper and W2 domain-containing protein 2	Q9Y6E2;Q9Y6E2-2	Q9Y6E2			0.107465	0.0475435	-0.00175571	0.419785	-0.606477	0.0334387	0.291539	0.71095	0.537129	5	4	4	10.5	8.8	8.8	48.162	0	27.492	344890000	19
C11orf98	Uncharacterized protein C11orf98	E9PRG8	E9PRG8			NaN	-0.66293	0.169214	0.294904	NaN	0.198812	-1.00386	-1.09748	-0.970114	2	2	2	17.2	17.2	17.2	13.798	0	26.742	2863500000	49
C12orf10	UPF0160 protein MYG1, mitochondrial	Q9HB07	Q9HB07			NaN	0.250781	NaN	-0.332086	-0.128002	0.209307	-0.40549	NaN	NaN	7	7	7	23.7	23.7	23.7	42.449	0	51.216	740320000	25
C14orf166	UPF0568 protein C14orf166	Q9Y224	Q9Y224			0.37406	-0.166969	NaN	-1.05683	0.665237	0.1845	-0.378496	-0.0260754	NaN	7	7	7	34	34	34	28.068	0	47.196	777140000	25
C19orf43	Uncharacterized protein C19orf43	Q9BQ61	Q9BQ61			NaN	0	NaN	NaN	NaN	NaN	0.736944	-0.0381145	NaN	2	2	2	19.9	19.9	19.9	18.419	0.00077399	15.718	188780000	12
C1QBP	Complement component 1 Q subcomponent-binding protein, mitochondrial	Q07021	Q07021			NaN	0.264911	0.26331	-1.53789	0.604432	0.405238	-0.927348	-1.98259	NaN	6	6	6	32.6	32.6	32.6	31.362	0	87.077	4481800000	90
CACYBP	Calcyclin-binding protein	Q9HB71-3;Q9HB71	Q9HB71-3;Q9HB71			NaN	0	NaN	NaN	NaN	NaN	0.280977	0.19895	NaN	5	5	5	33.5	33.5	33.5	21.228	0	32.736	794690000	13
CAD	CAD protein;Glutamine-dependent carbamoyl-phosphate synthase;Aspartate carbamoyltransferase;Dihydroorotase	P27708	P27708			NaN	-0.605497	NaN	0.256479	NaN	0.349018	NaN	NaN	NaN	4	4	4	1.9	1.9	1.9	242.98	0	26.65	161490000	16
CALD1	Caldesmon	Q05682-5;Q05682-4;Q05682-3;Q05682-6;Q05682-2;Q05682	Q05682-5;Q05682-4;Q05682-3;Q05682-6;Q05682-2;Q05682			0	NaN	NaN	NaN	NaN	NaN	0.269934	0.088459	0.684237	2	2	2	3.8	3.8	3.8	61.212	0.0006592	11.526	156280000	5
CALR	Calreticulin	P27797	P27797			-0.0871172	0.608218	-0.268413	-0.0810957	0.689578	-0.861171	0.290023	0.383412	0.0405149	15	15	15	58	58	58	48.141	0	209.62	14015000000	181
CALU	Calumenin	O43852-9;O43852-5;O43852-2;O43852;O43852-4;O43852-3;O43852-12;O43852-13;O43852-14;O43852-7;O43852-15;O43852-11;O43852-8;O43852-10;O43852-6	O43852-9;O43852-5;O43852-2;O43852;O43852-4;O43852-3;O43852-12;O43852-13;O43852-14;O43852-7;O43852-15;O43852-11;O43852-8;O43852-10;O43852-6			NaN	NaN	NaN	-0.581202	0.372578	0.208624	NaN	NaN	NaN	4	4	4	32.5	32.5	32.5	17.639	0	26.862	367320000	15
CAND1	Cullin-associated NEDD8-dissociated protein 1	Q86VP6;Q86VP6-2;Q86VP6-3;O75155-2;O75155	Q86VP6;Q86VP6-2			0.0723982	-0.0711546	-0.0461702	0.121495	-0.150744	0.0741758	-0.0632696	-0.0547171	0.0944986	35	35	35	33.5	33.5	33.5	136.37	0	323.31	19969000000	454
CANX	Calnexin	P27824;P27824-2;P27824-3	P27824;P27824-2;P27824-3			-0.216523	0.339145	-0.123572	-0.068518	0.234932	-0.165465	0.363296	0.130638	0.723959	19	19	19	38.3	38.3	38.3	67.567	0	191.39	11471000000	200
CAP1	Adenylyl cyclase-associated protein 1	Q01518-2;Q01518	Q01518-2;Q01518			0.42815	-0.471922	0.381914	0.179941	-0.264841	-0.253241	0.0117795	0.54343	0.534414	13	13	12	32.5	32.5	30.8	51.83	0	132.58	3716800000	99
CAPN1	Calpain-1 catalytic subunit	P07384	P07384			0.400318	-0.0245899	NaN	0.375267	-0.377753	-0.373242	0.200428	-0.0847229	0.27531	7	7	7	9.4	9.4	9.4	81.889	0	44.286	1014900000	26
CAPN2	Calpain-2 catalytic subunit	P17655;P17655-2	P17655;P17655-2			0.172844	-0.612952	NaN	0.519884	0.200428	-0.280203	-0.148899	-0.133343	NaN	8	8	8	12.6	12.6	12.6	79.994	0	66.735	895460000	37
CAPNS1	Calpain small subunit 1	P04632;Q96L46	P04632			-0.209909	0.261412	-0.784109	0.238787	0.486021	0.00779915	0.34923	0.628637	-0.829985	7	7	7	36.6	36.6	36.6	28.315	0	75.743	3368900000	88
CAPRIN1	Caprin-1	Q14444-2;Q14444	Q14444-2;Q14444			0.251558	-0.0762142	0.153835	0.19021	-0.521365	0.0019757	0.195322	0.453226	NaN	5	5	5	12.1	12.1	12.1	76.861	0	73.817	1022600000	41
CAPZA1	F-actin-capping protein subunit alpha-1	P52907	P52907			0.508684	0.129926	0.0983407	-0.142104	0.0702702	-0.665118	0.293434	0.191225	0.275135	6	6	5	27.6	27.6	24.1	32.922	0	67.276	1249100000	45
CAPZB	F-actin-capping protein subunit beta	P47756-2;P47756	P47756-2;P47756			-0.140155	-0.131836	0.617873	0.0960773	-0.273616	-0.168342	0.125258	0.0190605	0.723908	10	10	10	36	36	36	30.628	0	75.266	5044300000	140
CARS	Cysteine--tRNA ligase, cytoplasmic	P49589-2;P49589;P49589-3	P49589-2;P49589;P49589-3			0.311475	NaN	NaN	NaN	-0.311475	NaN	0.236678	0.313045	NaN	6	6	6	9.9	9.9	9.9	82.845	0	42.866	677870000	14
CASP3	Caspase-3;Caspase-3 subunit p17;Caspase-3 subunit p12	P42574	P42574			NaN	-0.0128632	NaN	NaN	-0.12413	0.136993	0.493721	0.613937	NaN	2	2	2	6.9	6.9	6.9	31.608	0	18.775	587980000	27
CBR1	Carbonyl reductase [NADPH] 1	P16152;P16152-2	P16152;P16152-2			0.477102	0.0798702	NaN	-0.237013	-0.113899	-0.20606	0.56897	0.439066	NaN	9	9	7	47.7	47.7	37.2	30.375	0	151.89	2286500000	90
CBX3	Chromobox protein homolog 3	Q13185	Q13185			0.111871	0.34232	NaN	0.0166386	0.0250042	-0.495834	0.415049	0.133288	NaN	5	5	4	23.5	23.5	14.8	20.811	0	48.071	2353900000	76
CCAR2	Cell cycle and apoptosis regulator protein 2	Q8N163;Q8N163-2	Q8N163;Q8N163-2			0.364035	0.043053	-0.107288	-0.0160348	-0.0626618	-0.221103	0.174742	-0.0172021	0.730841	9	9	9	11.4	11.4	11.4	102.9	0	79.199	1082000000	35
CCT2	T-complex protein 1 subunit beta	P78371;P78371-2	P78371;P78371-2			-0.0600964	-0.244425	0.442124	-0.0713154	0.0241569	-0.0904442	0.049229	0.315163	0.747216	28	28	28	62.4	62.4	62.4	57.488	0	323.31	23831000000	462
CCT3	T-complex protein 1 subunit gamma	P49368;P49368-2	P49368;P49368-2			-0.390478	0.0805375	-0.222422	0.0142571	0.299925	0.218181	-0.117714	0.325628	0.189745	26	26	26	49.5	49.5	49.5	60.533	0	313.65	14928000000	306
CCT4	T-complex protein 1 subunit delta	P50991;P50991-2	P50991;P50991-2			-0.0549456	-0.113255	0.203246	0.158248	-0.13114	-0.0621535	-0.0114333	0.0929273	0.275438	18	18	18	42.3	42.3	42.3	57.924	0	219.65	14531000000	256
CCT5	T-complex protein 1 subunit epsilon	P48643;P48643-2	P48643;P48643-2			-0.0789582	0.0222286	0.46189	-0.145908	-0.142433	-0.116819	0.167002	0.397414	0.387692	28	28	28	58.2	58.2	58.2	59.67	0	250.81	9948700000	232
CCT6A	T-complex protein 1 subunit zeta	P40227;P40227-2	P40227;P40227-2			0.318116	-0.0388657	0.132984	0.218836	-0.43671	-0.19436	0.133564	0.130936	-0.372211	22	22	17	49.5	49.5	40.5	58.024	0	236.37	13655000000	297
CCT7	T-complex protein 1 subunit eta	Q99832;Q99832-3;Q99832-4;Q99832-2	Q99832;Q99832-3;Q99832-4;Q99832-2			0.0147225	-0.000597318	0.451929	0.0705144	-0.200461	-0.336108	0.246481	0.172254	0.613043	20	20	20	43.1	43.1	43.1	59.366	0	257.89	13446000000	282
CCT8	T-complex protein 1 subunit theta	P50990;P50990-2;P50990-3	P50990;P50990-2;P50990-3			0.14438	0.0869347	-0.560927	0.218952	0.179908	-0.0692485	0.257087	0.332769	-0.0412391	29	29	29	55.5	55.5	55.5	59.62	0	323.31	33267000000	644
CDC37	Hsp90 co-chaperone Cdc37;Hsp90 co-chaperone Cdc37, N-terminally processed	Q16543	Q16543			0.300351	0.246793	NaN	-0.687354	0.219913	-0.0797031	0.487415	0.244786	NaN	6	6	6	20.6	20.6	20.6	44.468	0	67.927	1988000000	50
CDC42	Cell division control protein 42 homolog	P60953;P60953-1	P60953;P60953-1			-0.69339	-1.09691	NaN	0.463533	0.951052	0.375717	-0.131773	NaN	2.47554	4	4	3	27.2	27.2	21.5	21.258	0	29.862	1066400000	27
CDK1	Cyclin-dependent kinase 1	P06493;P06493-2;Q00526;P11802-2;P11802;Q00534;Q96Q40-6;Q96Q40-4;Q96Q40-3;O94921-3;Q96Q40-5;Q96Q40;O94921-2;O94921;Q07002;Q00536;Q00536-3;Q07002-3;Q00537-2;Q00537;Q00536-2	P06493;P06493-2			0.318393	-0.112973	NaN	0.824456	-0.670377	-0.3595	0.71412	0.743934	NaN	5	4	3	16.8	14.1	10.4	34.095	0	41.619	737900000	36
CDK12	Cyclin-dependent kinase 12	Q9NYV4-2;Q9NYV4;Q9NYV4-3	Q9NYV4-2;Q9NYV4;Q9NYV4-3			NaN	0	NaN	NaN	NaN	NaN	2.81214	2.54301	2.90947	23	23	21	18.6	18.6	17.4	163.23	0	281.86	4792900000	133
CDK5	Cyclin-dependent-like kinase 5	Q00535;Q00535-2	Q00535;Q00535-2			NaN	-0.147731	NaN	-0.00264311	0.177849	-0.0274749	NaN	NaN	NaN	4	3	3	13	10.3	10.3	33.304	0	23.72	238710000	6
CDKN2A	Cyclin-dependent kinase inhibitor 2A	P42771;P42771-4;P42771-2;P42771-3;P42772	P42771;P42771-4;P42771-2;P42771-3			NaN	NaN	NaN	-0.792264	0.341323	0.450942	0.0114466	NaN	NaN	4	4	4	40.4	40.4	40.4	16.532	0	28.328	1054400000	20
CDO1	Cysteine dioxygenase type 1	Q16878	Q16878			0.430583	0.044539	0.459038	NaN	-0.93416	NaN	0.186478	0.274184	0.0205903	2	2	2	7	7	7	22.972	0.00068399	12.237	1709700000	31
CDS2	Phosphatidate cytidylyltransferase 2	O95674	O95674			NaN	NaN	-0.25503	NaN	0.25503	NaN	-0.86212	NaN	0.26026	3	3	3	10.3	10.3	10.3	51.417	0	28.634	362720000	18
CENPV	Centromere protein V	Q7Z7K6-3;Q7Z7K6	Q7Z7K6-3;Q7Z7K6			-0.797514	-0.703823	0.70644	-0.163559	1.26283	-0.304377	-0.0861607	-0.919441	0.305002	2	2	2	9.6	9.6	9.6	29.73	0.0007485	14.36	221570000	19
CERS2	Ceramide synthase 2	Q96G23	Q96G23			NaN	NaN	NaN	0.247642	0.017814	-0.265456	-0.205582	-0.252492	NaN	2	2	2	6.6	6.6	6.6	44.876	0.00075643	14.716	318810000	7
CFL1	Cofilin-1	P23528	P23528			0.426309	0.316776	-0.554249	-0.111371	-0.203152	0.125688	0.48429	0.812957	-0.16582	9	9	7	64.5	64.5	47.6	18.502	0	151.55	13128000000	137
CHCHD3	MICOS complex subunit MIC19	Q9NX63	Q9NX63			NaN	NaN	NaN	0.195758	-0.167146	-0.0286115	NaN	NaN	NaN	3	3	3	12.3	12.3	12.3	26.152	0	23.333	248790000	12
CHD4	Chromodomain-helicase-DNA-binding protein 4	Q14839;Q14839-2;Q12873-2;Q12873;Q12873-3;Q8TDI0	Q14839;Q14839-2			0.291	-0.418868	0.187162	-0.181077	0.121783	NaN	NaN	-0.332318	0.117995	7	7	7	3.5	3.5	3.5	218	0	48.322	509430000	16
CHORDC1	Cysteine and histidine-rich domain-containing protein 1	Q9UHD1-2;Q9UHD1	Q9UHD1-2;Q9UHD1			0.945079	-0.13881	-0.680083	0.206724	-0.0547053	-0.278205	0.15779	0.32232	0.241983	7	7	7	30.7	30.7	30.7	35.286	0	70.052	2624700000	54
CIAPIN1	Anamorsin	Q6FI81-3;Q6FI81	Q6FI81-3;Q6FI81			-0.0799627	-0.178342	0.731105	0.0154638	-0.085721	-0.402543	-0.281278	0.692655	0.787354	4	4	4	13.7	13.7	13.7	32.212	0	30.667	391690000	22
CKAP4	Cytoskeleton-associated protein 4	Q07065;Q96K21-4;Q96K21-3;Q96K21-2;Q96K21	Q07065			0.476913	0.238745	-1.1495	0.415771	0.00965118	0.00842285	0.784941	0.925224	0.346766	27	27	27	55	55	55	66.022	0	323.31	18321000000	362
CKAP5	Cytoskeleton-associated protein 5	Q14008-2;Q14008;Q14008-3	Q14008-2;Q14008;Q14008-3			0.219296	-0.025856	0.318264	-0.173048	-0.0601578	-0.278498	0.374004	0.522242	0.907093	21	21	21	11.8	11.8	11.8	218.52	0	157.82	2557600000	130
CKB	Creatine kinase B-type	P12277	P12277			-1.30626	0.540175	-0.147836	-0.162528	0.666884	0.409568	0.0939283	-0.515321	-1.4543	16	16	16	59.6	59.6	59.6	42.644	0	323.31	29979000000	396
CLIC1	Chloride intracellular channel protein 1	O00299	O00299			-0.0827786	-0.0390145	0.227425	-0.0208413	-0.16295	0.0781597	0.295971	0.854069	0.968458	8	8	8	44.4	44.4	44.4	26.922	0	105.6	7003500000	125
CLIC4	Chloride intracellular channel protein 4	Q9Y696	Q9Y696			0.248999	-0.064436	NaN	-0.158072	-0.024353	-0.00213814	0.801294	0.97011	0.728525	6	6	6	33.6	33.6	33.6	28.772	0	64.787	1526400000	58
CLPTM1	Cleft lip and palate transmembrane protein 1	O96005;O96005-4	O96005;O96005-4			0	NaN	NaN	NaN	NaN	NaN	NaN	NaN	NaN	3	3	3	3.9	3.9	3.9	76.096	0	22.552	140200000	9
CLTA	Clathrin light chain A	P09496-2;P09496-4;P09496-3;P09496;P09496-5	P09496-2;P09496-4;P09496-3;P09496			-0.0972392	-0.035916	0.387817	0.177347	-0.228036	-0.203973	0.669671	1.18368	0.738921	7	7	7	28.9	28.9	28.9	23.662	0	57.489	4133600000	91
CLTC	Clathrin heavy chain 1	Q00610-2;Q00610;P53675-2;P53675	Q00610-2;Q00610			-0.119087	-0.0647182	0.0870762	-0.0863056	-0.0292206	0.212255	-0.326328	-0.659271	-0.649681	51	51	51	38.6	38.6	38.6	187.89	0	323.31	29899000000	628
CLUH	Clustered mitochondria protein homolog	O75153	O75153			NaN	NaN	NaN	NaN	0	NaN	NaN	NaN	NaN	6	6	6	5	5	5	146.67	0	36.855	268860000	6
CMPK1	UMP-CMP kinase	P30085;P30085-2	P30085			0.184663	0.151456	NaN	0.728469	-0.79259	-0.271998	0.354896	0.669358	NaN	3	3	3	17.9	17.9	17.9	22.222	0	26.35	364270000	38
CNDP2	Cytosolic non-specific dipeptidase	Q96KP4;Q96KP4-2	Q96KP4;Q96KP4-2			0.130095	-0.0288057	0.0946226	-0.287538	-3.91006e-05	0.0916643	0.253459	0.315402	0.219579	13	13	13	38.1	38.1	38.1	52.878	0	108.5	2892700000	113
CNN3	Calponin-3	Q15417-3;Q15417;Q15417-2;Q99439-2;Q99439	Q15417-3;Q15417;Q15417-2			0.256102	-0.0522823	0.315256	0.0460682	-0.479013	-0.0861301	0.42914	0.310635	-0.427084	6	6	6	27.6	27.6	27.6	31.38	0	56.252	1142600000	70
CNP	2,3-cyclic-nucleotide 3-phosphodiesterase	P09543-2;P09543	P09543-2;P09543			0.11328	-0.0357792	NaN	0.433856	-0.467986	-0.0433704	-0.0282681	0.0269859	-0.389005	9	9	9	20.4	20.4	20.4	45.098	0	70.831	1109100000	37
COASY	Bifunctional coenzyme A synthase;Phosphopantetheine adenylyltransferase;Dephospho-CoA kinase	Q13057;Q13057-2	Q13057;Q13057-2			0.207137	0.218097	NaN	-0.527188	0.295314	-0.193359	NaN	NaN	NaN	4	4	4	7.8	7.8	7.8	62.328	0	27.284	393410000	16
COPA	Coatomer subunit alpha;Xenin;Proxenin	P53621;P53621-2	P53621;P53621-2			0.169212	-0.239455	0.240726	0.141795	-0.181353	-0.130925	0.14233	-0.0783736	0.543159	22	22	22	21.1	21.1	21.1	138.34	0	176.86	5103400000	174
COPB1	Coatomer subunit beta	P53618	P53618			0.320427	0.16683	-0.0327915	0.31409	-0.44611	-0.322445	0.241989	-0.0545314	-0.0932277	17	17	17	23.8	23.8	23.8	107.14	0	136.79	4101500000	96
COPB2	Coatomer subunit beta	P35606-2;P35606	P35606-2;P35606			0.305598	-0.0674219	-0.12432	0.246209	-0.40025	0.040185	0.498637	0.215314	-0.670718	16	16	16	19.4	19.4	19.4	99.045	0	122.58	2948000000	112
COPG1	Coatomer subunit gamma-1	Q9Y678	Q9Y678			0.371431	-0.393105	-0.514252	0.281574	0.213779	0.0405728	0.175863	0.207897	-0.650702	11	11	9	14.9	14.9	12.6	97.717	0	76.449	14852000000	64
COPS3	COP9 signalosome complex subunit 3	Q9UNS2;Q9UNS2-2	Q9UNS2;Q9UNS2-2			-0.186024	-0.209299	0.353163	0.479246	-0.204405	-0.232681	-0.0195217	0.374367	0.539518	5	5	5	15.4	15.4	15.4	47.873	0	73.628	1390400000	38
COPS6	COP9 signalosome complex subunit 6	Q7L5N1	Q7L5N1	+		NaN	-0.0629896	NaN	0.0426509	NaN	0.0203387	0.516537	0.0810897	NaN	2	2	2	6.7	6.7	6.7	36.163	0.00075358	14.595	354010000	11
CORO1C	Coronin-1C	Q9ULV4;Q9ULV4-2;Q9ULV4-3	Q9ULV4;Q9ULV4-2;Q9ULV4-3			NaN	NaN	NaN	-0.108178	0.0301183	0.0780595	NaN	NaN	NaN	3	3	3	5.7	5.7	5.7	53.248	0	17.877	254410000	11
COX5A	Cytochrome c oxidase subunit 5A, mitochondrial	P20674	P20674			-0.116943	-0.340668	NaN	0.457611	NaN	NaN	-0.171043	-0.261183	NaN	2	2	2	10.7	10.7	10.7	16.762	0.00071788	13.238	708510000	14
COX5B	Cytochrome c oxidase subunit 5B, mitochondrial	P10606	P10606			0.502774	0.0287334	NaN	0.176774	-0.446105	-0.262177	0.568629	0.384385	NaN	4	4	4	24.8	24.8	24.8	13.696	0	30.027	947770000	50
CPNE1	Copine-1	Q99829	Q99829			0.468072	0.32801	-0.266377	-0.53406	-0.0923033	0.0966597	0.226863	0.252189	-1.46142	8	8	8	15.5	15.5	15.5	59.058	0	63.837	1408500000	68
CPNE3	Copine-3	O75131;Q86YQ8-2;Q9HCH3-2;Q96FN4-2;Q8IYJ1;Q96A23;O95741;Q9UBL6-2;Q86YQ8;Q96A23-2;Q9HCH3;O95741-2;Q9UBL6	O75131			0.0772812	0.15912	NaN	-0.78085	0.0820477	0.462402	0.0527966	0.0265133	NaN	10	10	9	18.4	18.4	16.8	60.13	0	66.534	1383200000	66
CPPED1	Serine/threonine-protein phosphatase CPPED1	Q9BRF8-3;Q9BRF8-2;Q9BRF8	Q9BRF8-3;Q9BRF8-2;Q9BRF8			0	NaN	NaN	NaN	NaN	NaN	NaN	NaN	NaN	2	2	2	18	18	18	13.462	0.00077882	16.09	159530000	9
CPSF6	Cleavage and polyadenylation specificity factor subunit 6	Q16630-3;Q16630;Q16630-2	Q16630-3;Q16630;Q16630-2			-0.0392143	0.0972145	NaN	0.117583	-0.419275	0.243691	0.390258	0.305245	NaN	5	5	5	12.6	12.6	12.6	52.325	0	33.027	556720000	22
CRYZ	Quinone oxidoreductase	Q08257-3;Q08257;Q08257-2	Q08257-3;Q08257;Q08257-2			0.64806	-0.0596504	0.112064	-0.0289783	-0.468468	-0.203028	-0.228725	1.13697	NaN	4	4	4	16.6	16.6	16.6	31.528	0	28.443	288700000	12
CS	Citrate synthase, mitochondrial	O75390	O75390			-0.150217	0.0161759	-0.00158151	-0.0316451	0.0504052	0.116863	0.13437	0.209259	0.898664	12	12	12	24.9	24.9	24.9	51.712	0	129.01	7026700000	162
CSDE1	Cold shock domain-containing protein E1	O75534-2;O75534;O75534-3;O75534-4	O75534-2;O75534;O75534-3;O75534-4			0.175063	-0.197097	0.0663916	0.703541	-0.684861	-0.0630372	-0.200387	0.0607001	0.0108248	9	9	9	13.2	13.2	13.2	85.746	0	69.776	1312500000	50
CSE1L	Exportin-2	P55060-3;P55060;P55060-4;P55060-2	P55060-3;P55060;P55060-4			0.166628	0.176695	0.0176315	-0.296045	-0.0658474	0.000938416	0.181683	0.427723	0.694376	28	28	28	32.2	32.2	32.2	107.78	0	290.71	10279000000	303
CSNK2B	Casein kinase II subunit beta	P67870	P67870			-0.123076	-0.872214	NaN	0.739985	0.255305	NaN	0.290631	-0.139915	NaN	2	2	2	7.9	7.9	7.9	24.942	0.0006812	12.095	356450000	11
CTBP2	C-terminal-binding protein 2	P56545;P56545-3;P56545-2	P56545;P56545-3;P56545-2			0.14718	-0.377697	0.190708	0.0519482	0.0834843	-0.0956233	-0.111071	0.197818	0.314552	5	5	3	11	11	7.2	48.944	0	32.148	795160000	21
CTNNA1	Catenin alpha-1	P35221;P35221-2;P35221-3;P26232-4;P26232-6	P35221;P35221-2;P35221-3			0.694967	0.537258	-1.19637	0.897266	-0.454933	-0.478189	0.462458	0.519398	-0.826355	17	17	14	21.3	21.3	17.4	100.07	0	177.04	2599400000	98
CTNNAL1	Alpha-catulin	Q9UBT7-3;Q9UBT7-2;Q9UBT7	Q9UBT7-3;Q9UBT7-2;Q9UBT7			-0.182854	-0.398354	-0.181284	0.385816	0.376676	NaN	-0.398209	-0.298989	0.0142265	2	2	2	3.5	3.5	3.5	72.615	0.00066269	11.622	236120000	8
CTNNB1	Catenin beta-1	P35222	P35222			NaN	-0.181502	NaN	0.372277	-0.00104046	-0.189734	0.131795	NaN	NaN	3	3	3	4.6	4.6	4.6	85.496	0	28.747	296320000	7
CTPS1	CTP synthase 1	P17812;P17812-2;Q9NRF8	P17812;P17812-2			-0.0215054	-0.440207	-0.00448418	0.27989	0.0388298	0.147476	0.175398	-0.0751286	NaN	7	7	7	10.5	10.5	10.5	66.69	0	74.074	1397500000	56
CTSZ	Cathepsin Z	Q9UBR2	Q9UBR2			NaN	NaN	NaN	NaN	0.0334034	-0.0334034	NaN	NaN	NaN	4	4	4	12.9	12.9	12.9	33.868	0	43.065	2196000000	34
CTTN	Src substrate cortactin	Q14247;Q14247-3;Q14247-2	Q14247;Q14247-3;Q14247-2			0.363507	0.666123	-0.438352	0.18118	-0.224969	-0.547489	0.753979	0.361394	0.970069	11	11	11	22.7	22.7	22.7	61.585	0	68.525	1257500000	23
CUL1	Cullin-1	Q13616	Q13616			-0.0971184	NaN	NaN	NaN	NaN	0.0971184	0.457697	0.409937	1.44238	5	5	5	6.7	6.7	6.7	89.677	0	32.052	398920000	15
CUL4B	Cullin-4B	Q13620-1;Q13620;Q13620-3	Q13620-1;Q13620;Q13620-3			0.765398	-0.262146	0.443089	-0.0565964	-0.806366	-0.0833794	0.0715259	-0.040466	0.444687	11	11	6	13.6	13.6	8.4	102.3	0	87.94	1347000000	50
CWF19L1	CWF19-like protein 1	Q69YN2-3;Q69YN2	Q69YN2-3;Q69YN2			0	NaN	NaN	NaN	NaN	NaN	NaN	NaN	NaN	3	3	3	8.7	8.7	8.7	45.536	0	18.155	69451000	4
CYB5B	Cytochrome b5 type B	O43169	O43169			0.963624	-0.0144108	NaN	0.422839	-1.14332	-0.228734	2.85931	1.84362	NaN	4	4	4	50.7	50.7	50.7	16.332	0	55.695	4067700000	42
CYB5R3	NADH-cytochrome b5 reductase 3;NADH-cytochrome b5 reductase 3 membrane-bound form;NADH-cytochrome b5 reductase 3 soluble form	P00387-2;P00387;P00387-3	P00387-2;P00387;P00387-3			-0.0984787	0.225383	NaN	-0.142888	0.00460205	0.0113808	NaN	NaN	NaN	6	6	6	28.8	28.8	28.8	31.628	0	52.239	2175900000	49
CYC1	Cytochrome c1, heme protein, mitochondrial	P08574	P08574			NaN	-1.05452	NaN	0.321772	0.510497	0.22225	NaN	NaN	-0.788772	3	3	3	9.5	9.5	9.5	35.422	0	21.637	440680000	16
CYFIP1	Cytoplasmic FMR1-interacting protein 1	Q7L576;Q7L576-3	Q7L576			0.179702	0.00946159	NaN	0.189754	-0.215565	-0.163352	-0.00479584	-0.290549	NaN	8	8	1	6.5	6.5	1	145.18	0	60.435	784340000	26
DARS	Aspartate--tRNA ligase, cytoplasmic	P14868;P14868-2	P14868;P14868-2			0.279444	-0.110535	0.14649	0.32707	-0.503479	-0.13899	0.0580082	0.0407085	0.399803	14	14	14	31.1	31.1	31.1	57.136	0	147.75	2912300000	99
DBNL	Drebrin-like protein	Q9UJU6;Q9UJU6-5	Q9UJU6;Q9UJU6-5			0.185533	-0.130944	0.442029	-0.0566451	-0.0480086	-0.391965	0.288822	0.244209	0.345414	6	6	1	15.8	15.8	2.8	48.207	0	60.067	913480000	54
DCD	Dermcidin;Survival-promoting peptide;DCD-1	P81605;P81605-2	P81605;P81605-2			-0.157828	0.0687649	NaN	-0.302087	0.871328	-0.480178	-0.717547	-0.96943	NaN	3	3	3	22.7	22.7	22.7	11.284	0	26.254	2687600000	69
DCTN1	Dynactin subunit 1	Q14203-5;Q14203-2;Q14203-3;Q14203-4;Q14203-6;Q14203	Q14203-5;Q14203-2;Q14203-3;Q14203-4;Q14203-6;Q14203			0.133119	NaN	-0.151812	0.546714	0.054784	-0.582805	-0.927703	-0.157248	0.865447	8	8	8	7.9	7.9	7.9	126.73	0	65.687	795280000	34
DCXR	L-xylulose reductase	Q7Z4W1	Q7Z4W1			0	NaN	NaN	NaN	NaN	NaN	0.517473	0.272459	0.503157	4	4	4	16.4	16.4	16.4	25.913	0	26.095	222160000	4
DDB1	DNA damage-binding protein 1	Q16531;Q16531-2	Q16531			0.0432088	-0.0252002	0.558025	-0.650086	-0.00618966	0.0802418	0.11297	-0.0364059	-0.526575	21	21	21	19.6	19.6	19.6	126.97	0	161.28	3931400000	113
DDOST	Dolichyl-diphosphooligosaccharide--protein glycosyltransferase 48 kDa subunit	P39656-3;P39656;P39656-2	P39656-3;P39656;P39656-2			0.147407	0.186145	NaN	-0.535239	-0.0172619	0.218948	0.254623	0.0602337	NaN	4	4	4	8.7	8.7	8.7	49.019	0	29.659	880110000	25
DDT;DDTL	D-dopachrome decarboxylase;D-dopachrome decarboxylase-like protein	P30046;P30046-2;A6NHG4	P30046;P30046-2;A6NHG4			NaN	0.142365	NaN	-0.689652	0.243571	0.303716	0.311528	-0.145728	NaN	4	4	4	37.3	37.3	37.3	12.712	0	57.903	817320000	25
DDX1	ATP-dependent RNA helicase DDX1	Q92499-3;Q92499;Q92499-2	Q92499-3;Q92499;Q92499-2			0.284992	-0.0112762	0.238098	0.0484047	-0.474859	-0.0853596	-0.234318	-0.514917	0.184637	12	12	12	23.2	23.2	23.2	68.712	0	100.3	2426100000	82
DDX17	Probable ATP-dependent RNA helicase DDX17	Q92841-1;Q92841-3;Q92841;Q92841-2	Q92841-1;Q92841-3;Q92841;Q92841-2			0.192917	-0.125807	0.273794	-0.107918	-0.413824	0.180839	0.214472	0.173071	-1.09822	17	16	12	29.1	27.4	21.2	72.371	0	157.19	5403900000	159
DDX39B;DDX39A	Spliceosome RNA helicase DDX39B;ATP-dependent RNA helicase DDX39A	Q13838;Q13838-2;O00148;O00148-2;O00148-3	Q13838;Q13838-2;O00148			-0.0363032	0.3178	-0.175639	-0.295502	0.0716432	0.118001	0.0736078	-0.102593	-0.629092	14	14	14	38.8	38.8	38.8	48.991	0	138.66	9373600000	207
DDX3X;DDX3Y	ATP-dependent RNA helicase DDX3X;ATP-dependent RNA helicase DDX3Y	O00571-2;O00571;O15523-2;O15523;O15523-3;Q9NQI0-3;Q9NQI0-2;Q9NQI0-4;Q9NQI0	O00571-2;O00571;O15523-2;O15523			-0.0610008	-0.249628	0.0887566	0.3284	-0.0564861	-0.0500412	-0.211477	-0.126583	0.702032	19	19	18	30.7	30.7	28.9	71.354	0	196.51	6826100000	173
DDX46	Probable ATP-dependent RNA helicase DDX46	Q7L014	Q7L014			0.350548	-0.175197	0.358473	0.00591723	-0.267692	-0.27205	-0.138929	-0.0847295	-0.0644315	25	25	25	22.9	22.9	22.9	117.36	0	221.62	6595800000	224
DDX5	Probable ATP-dependent RNA helicase DDX5	P17844-2;P17844	P17844-2;P17844			-0.117327	-0.124681	0.308191	-0.0725288	-0.110144	0.116489	0.272589	0.105001	0.693291	15	10	10	26.2	16.6	16.6	60.563	0	69.068	1956800000	75
DDX6	Probable ATP-dependent RNA helicase DDX6	P26196	P26196			-0.0772625	-0.0772434	NaN	0.145483	0.0802196	-0.0711971	0.26672	0.363064	NaN	8	8	8	28.6	28.6	28.6	54.416	0	116.26	2403800000	56
DEK	Protein DEK	P35659;P35659-2	P35659;P35659-2			-0.472051	-0.085199	NaN	0.847296	-0.266786	-0.0232597	0.20764	NaN	-0.218649	5	5	5	14.1	14.1	14.1	42.674	0	30.066	736940000	34
DENR	Density-regulated protein	O43583	O43583			-0.403736	-0.309656	-0.024551	0.327702	0.410241	NaN	0.619377	0.701271	-0.546758	4	4	4	24.7	24.7	24.7	22.092	0	32.953	620110000	23
DHX15	Pre-mRNA-splicing factor ATP-dependent RNA helicase DHX15	O43143;O60231;Q14562	O43143			0.269111	0.0067625	0.0578852	-0.21222	-0.211928	0.0903902	-0.0120707	-0.0302649	NaN	13	13	13	17.6	17.6	17.6	90.932	0	84.206	2002300000	79
DHX9	ATP-dependent RNA helicase A	Q08211;Q08211-2	Q08211			0.249557	-0.0524406	0.483139	-0.846722	-0.0772095	0.243675	0.0553284	-0.398436	0.0966167	28	28	28	22.5	22.5	22.5	140.96	0	213.22	5633500000	145
DIAPH1	Protein diaphanous homolog 1	O60610-2;O60610-3;O60610	O60610-2;O60610-3;O60610			-0.175906	-0.120336	0.51697	0.367407	-0.256774	-0.331361	0.00258128	0.07573	0.720687	6	6	6	5.1	5.1	5.1	138.91	0	39.038	685060000	22
DLD	Dihydrolipoyl dehydrogenase, mitochondrial	P09622;P09622-2;P09622-3	P09622;P09622-2;P09622-3			-0.0763458	-0.0122321	-0.783385	0.566776	0.214126	0.0910603	-0.0141261	0.11622	1.40808	9	9	9	20.6	20.6	20.6	54.177	0	77.758	2096900000	80
DLST	Dihydrolipoyllysine-residue succinyltransferase component of 2-oxoglutarate dehydrogenase complex, mitochondrial	P36957;P36957-2	P36957;P36957-2			0.173383	-0.174661	0.156453	0.223006	0.0229273	-0.401109	0.0517607	-0.209973	1.21071	4	4	4	9.3	9.3	9.3	48.755	0	31.054	512620000	10
DNAJA1	DnaJ homolog subfamily A member 1	P31689;P31689-2	P31689;P31689-2			-0.748068	-0.2402	NaN	0.697948	-0.033802	0.324121	-0.299652	0.093956	NaN	5	5	5	17.4	17.4	17.4	44.868	0	38.651	1944300000	43
DNAJA2	DnaJ homolog subfamily A member 2	O60884	O60884			-0.0355358	-0.536507	0.0382729	0.592613	-0.129566	0.0707226	0.121878	0.30533	0.702444	4	4	4	8	8	8	45.745	0	26.894	388050000	27
DNAJB1	DnaJ homolog subfamily B member 1	P25685-2;P25685	P25685-2;P25685			NaN	NaN	NaN	-0.385982	0.948649	-0.562667	NaN	NaN	NaN	3	3	3	12.9	12.9	12.9	27.016	0	18.594	156550000	15
DNAJC7	DnaJ homolog subfamily C member 7	Q99615;Q99615-2	Q99615;Q99615-2			0.128434	-0.117871	0.393203	0.223907	-0.519839	-0.107834	-0.0264098	0.0815023	0.837293	10	10	10	19.6	19.6	19.6	56.44	0	81.535	1741300000	77
DNAJC9	DnaJ homolog subfamily C member 9	Q8WXX5	Q8WXX5			0.00586128	NaN	-0.0473576	0.351608	-0.310112	NaN	-0.0475445	0.212559	NaN	4	4	4	15	15	15	29.909	0	33.861	369220000	21
DNM1L	Dynamin-1-like protein	O00429-4;O00429-5;O00429-3;O00429-2;O00429;O00429-8;O00429-6;O00429-7	O00429-4;O00429-5;O00429-3;O00429-2;O00429;O00429-8;O00429-6;O00429-7			0.0478775	-0.0566834	NaN	0.0681774	-0.0314377	-0.0279339	-0.281348	-0.141452	NaN	8	8	8	16	16	16	78.099	0	58.164	616360000	27
DNM2	Dynamin-2	P50570-2;P50570-3;P50570-5;P50570;P50570-4;Q05193-5;Q05193-2;Q9UQ16-5;Q9UQ16-2;Q9UQ16-3;Q9UQ16;Q9UQ16-4	P50570-2;P50570-3;P50570-5;P50570;P50570-4			0.212229	-0.0795972	0.298392	0.0371955	-0.289842	-0.178377	0.094353	0.0192626	0.605185	10	10	6	11.7	11.7	7.6	97.651	0	74.607	1336500000	26
DPP3	Dipeptidyl peptidase 3	Q9NY33;Q9NY33-4;Q9NY33-2	Q9NY33;Q9NY33-4			0.0135086	0.248811	NaN	0.304778	-0.332833	-0.234264	0.364463	0.681079	0.183841	7	7	7	9.2	9.2	9.2	82.588	0	46.125	1388100000	31
DPP9	Dipeptidyl peptidase 9	Q86TI2-4;Q86TI2;Q86TI2-2	Q86TI2-4;Q86TI2;Q86TI2-2			0.0467911	-0.0708313	NaN	0.0839691	NaN	-0.0599289	0.215595	NaN	1.28814	2	2	2	2.3	2.3	2.3	95.012	0.00074294	14.098	99053000	9
DPYSL2	Dihydropyrimidinase-related protein 2	Q16555-2;Q16555;Q14194;Q14194-2	Q16555-2;Q16555			0.188365	-0.243787	0.377515	0.114852	0.151091	-0.588035	-0.0589097	0.00844065	0.69295	12	12	9	28.4	28.4	22.6	58.162	0	111.39	2754500000	85
DPYSL3	Dihydropyrimidinase-related protein 3	Q14195-2;Q14195	Q14195-2;Q14195			0.157527	0.0411561	-0.149176	-0.0880267	0.564582	-0.526063	0.186725	0.279729	0.501136	11	8	8	19.3	14.8	14.8	73.91	0	51.808	971620000	27
DPYSL5	Dihydropyrimidinase-related protein 5	Q9BPU6	Q9BPU6			-0.0455791	-0.154931	NaN	0.648635	-0.267907	-0.180217	0.340689	0.507136	NaN	3	3	3	6	6	6	61.421	0	21.403	942480000	16
DSP	Desmoplakin	P15924;P15924-2;P15924-3	P15924;P15924-2;P15924-3			0.496504	0.307041	0.539983	-0.632601	0.00889937	-0.719826	-0.557226	-0.0466274	0.535286	21	21	21	6.7	6.7	6.7	331.77	0	135.42	1664300000	72
DTYMK	Thymidylate kinase	P23919-2;P23919	P23919-2;P23919			0.0515432	0.40256	NaN	-0.129079	-0.325025	NaN	0.435538	0.814284	NaN	4	4	4	18.6	18.6	18.6	21.064	0	22.94	401190000	8
DUT	Deoxyuridine 5-triphosphate nucleotidohydrolase, mitochondrial	P33316-2;P33316	P33316-2;P33316			NaN	-0.191521	NaN	0.191521	NaN	NaN	-0.50527	NaN	NaN	4	4	4	28.7	28.7	28.7	17.748	0	37.904	702070000	18
DYNC1H1	Cytoplasmic dynein 1 heavy chain 1	Q14204	Q14204			0.439785	-0.11968	0.0603142	0.298626	-0.476282	-0.202763	0.134319	-0.024929	-0.177267	67	67	67	16.3	16.3	16.3	532.4	0	323.31	9413600000	331
DYNC1I2	Cytoplasmic dynein 1 intermediate chain 2	Q13409-6;Q13409-3;Q13409-7;Q13409-2;Q13409-5;Q13409	Q13409-6;Q13409-3;Q13409-7;Q13409-2;Q13409-5;Q13409			0.258314	0.176012	-0.185007	0.142765	-0.0528946	-0.33919	0.538448	0.0877533	0.745409	7	7	7	15.9	15.9	15.9	68.297	0	58.567	1273400000	33
DYNC1LI1	Cytoplasmic dynein 1 light intermediate chain 1	Q9Y6G9	Q9Y6G9			-0.525706	0.0915502	NaN	NaN	NaN	0.434156	-0.240241	-0.539218	NaN	3	3	3	6.3	6.3	6.3	56.578	0	18.05	290020000	10
ECH1	Delta(3,5)-Delta(2,4)-dienoyl-CoA isomerase, mitochondrial	Q13011	Q13011			0.141251	0.275935	NaN	0.181926	-0.250827	-0.348285	0.835158	0.423377	NaN	3	3	3	7.9	7.9	7.9	35.816	0	20.569	587180000	24
ECHS1	Enoyl-CoA hydratase, mitochondrial	P30084	P30084			-0.119941	-0.199654	NaN	0.814696	-0.198685	-0.296416	0.118913	0.374139	NaN	6	6	6	25.2	25.2	25.2	31.387	0	48.213	1348100000	39
ECI1	Enoyl-CoA delta isomerase 1, mitochondrial	P42126-2;P42126	P42126-2;P42126			0.118378	NaN	NaN	-0.0614414	NaN	-0.0569363	0.0963001	NaN	NaN	2	2	2	8.8	8.8	8.8	30.895	0	17.378	369110000	8
ECI2	Enoyl-CoA delta isomerase 2, mitochondrial	O75521-2;O75521	O75521-2;O75521			NaN	0	NaN	NaN	NaN	NaN	0.21582	0.0461521	NaN	4	4	4	12	12	12	39.609	0	26.69	5985900000	5
ECM29	Proteasome-associated protein ECM29 homolog	Q5VYK3	Q5VYK3			0.0873438	-0.282918	0.0479438	0.494284	-0.0927041	-0.253949	-0.15685	0.202714	0.295308	12	12	12	7.5	7.5	7.5	204.29	0	84.176	1308900000	56
EDC4	Enhancer of mRNA-decapping protein 4	Q6P2E9;Q6P2E9-2	Q6P2E9;Q6P2E9-2			0.499947	0.0185242	NaN	0.0304127	-0.416039	-0.132845	0.086895	0.0943394	NaN	6	6	6	3.9	3.9	3.9	151.66	0	36.149	784870000	15
EEF1A1;EEF1A1P5	Elongation factor 1-alpha 1;Putative elongation factor 1-alpha-like 3	P68104;Q5VTE0;P68104-2	P68104;Q5VTE0;P68104-2			-0.356234	-0.0797755	-0.402011	0.4773	0.457635	-0.0969149	-0.228392	-0.0515429	-1.53488	22	22	11	64.7	64.7	34	50.14	0	323.31	441820000000	874
EEF1B2	Elongation factor 1-beta	P24534	P24534			-0.23569	0.908541	-0.973428	-0.408536	0.348757	0.360356	-0.0167898	-0.0170568	NaN	4	4	4	24.4	24.4	24.4	24.763	0	90.194	7074100000	82
EEF1D	Elongation factor 1-delta	P29692;P29692-2;P29692-3;P29692-4	P29692;P29692-2;P29692-3;P29692-4			0.319348	0.05069	-0.218332	0.121806	-0.16662	-0.106891	0.447813	0.26035	-0.960022	9	9	9	41.3	41.3	41.3	31.121	0	173.26	3949300000	120
EEF1G	Elongation factor 1-gamma	P26641;P26641-2	P26641;P26641-2			-0.0555042	0.356744	-0.289727	0.138464	-0.0599559	-0.0900215	0.248806	0.226003	-0.891285	19	19	19	47.8	47.8	47.8	50.118	0	253.38	24309000000	324
EEF2	Elongation factor 2	P13639	P13639			0.128999	-0.0793826	-0.129763	0.150018	-0.110322	0.0404504	-0.0687987	0.0299066	-0.746224	44	44	43	59.6	59.6	58.4	95.337	0	323.31	110550000000	1041
EFTUD2	116 kDa U5 small nuclear ribonucleoprotein component	Q15029-2;Q15029-3;Q15029	Q15029-2;Q15029-3;Q15029			0.0541798	0.149046	-0.0152973	0.163532	-0.420674	0.0692135	-0.294484	-0.0372756	NaN	16	15	15	21.2	20.2	20.2	105.38	0	104.48	1911700000	55
EIF1AX;EIF1AY	Eukaryotic translation initiation factor 1A, X-chromosomal;Eukaryotic translation initiation factor 1A, Y-chromosomal	P47813;O14602	P47813;O14602			0.058754	-0.179037	NaN	0.187597	-0.0673141	NaN	NaN	-0.124533	NaN	2	2	2	14.6	14.6	14.6	16.46	0	16.94	450920000	20
EIF2AK2	Interferon-induced, double-stranded RNA-activated protein kinase	P19525;P19525-2	P19525;P19525-2			NaN	NaN	-0.0338078	0.153875	-0.120068	NaN	-0.207117	0.396877	-0.310806	5	5	5	10.3	10.3	10.3	62.094	0	30.514	288630000	5
EIF2B4	Translation initiation factor eIF-2B subunit delta	Q9UI10-3;Q9UI10;Q9UI10-2	Q9UI10-3;Q9UI10;Q9UI10-2			0.12122	NaN	NaN	0.189751	-0.236942	-0.074028	0.140949	0.106184	NaN	2	2	2	4.8	4.8	4.8	57.457	0.00070721	12.929	162630000	12
EIF2S1	Eukaryotic translation initiation factor 2 subunit 1	P05198	P05198			0.43767	0.0285495	0.0284313	0.272208	-0.528164	-0.238695	0.107582	0.346268	-0.0804383	12	12	12	42.5	42.5	42.5	36.112	0	107	3605800000	139
EIF2S2	Eukaryotic translation initiation factor 2 subunit 2	P20042	P20042			NaN	0.556101	NaN	-0.762472	0.170102	0.0362687	0.18311	0.272192	0.744771	10	10	10	36.9	36.9	36.9	38.388	0	90.722	1438200000	47
EIF2S3;EIF2S3L	Eukaryotic translation initiation factor 2 subunit 3;Putative eukaryotic translation initiation factor 2 subunit 3-like protein	P41091;Q2VIR3;Q2VIR3-2	P41091;Q2VIR3;Q2VIR3-2			0.38973	-0.15198	0.260141	0.461475	-0.666062	-0.293303	0.121742	0.0131105	0.530851	8	8	8	21.6	21.6	21.6	51.109	0	62.707	3110700000	91
EIF3A	Eukaryotic translation initiation factor 3 subunit A	Q14152;Q14152-2	Q14152;Q14152-2			0.256332	-0.586913	-0.0904395	0.108745	0.209915	0.102361	-0.0299117	0.171077	-0.21147	23	23	23	17.8	17.8	17.8	166.57	0	157.13	3165500000	135
EIF3B	Eukaryotic translation initiation factor 3 subunit B	P55884;P55884-2	P55884;P55884-2			0.494605	0.33364	-1.09142	0.465333	-0.447251	0.245097	0.263907	0.113276	0.264329	23	23	23	32.3	32.3	32.3	92.48	0	207.66	5954300000	179
EIF3C;EIF3CL	Eukaryotic translation initiation factor 3 subunit C;Eukaryotic translation initiation factor 3 subunit C-like protein	Q99613-2;Q99613;B5ME19	Q99613-2;Q99613;B5ME19			0.344358	-0.171212	0.0795552	0.393417	-0.383551	-0.262568	-0.0296291	-0.0421336	-0.428688	12	12	12	14.1	14.1	14.1	104.1	0	100.33	2597000000	95
EIF3D	Eukaryotic translation initiation factor 3 subunit D	O15371-2;O15371-3;O15371	O15371-2;O15371-3;O15371			0.209925	0.0732425	0.0454048	0.295081	-0.423118	-0.200535	0.0658878	-0.114933	NaN	6	6	6	16.4	16.4	16.4	58.14	0	53.45	1640000000	69
EIF3E	Eukaryotic translation initiation factor 3 subunit E	P60228	P60228			0.239736	-0.149699	0.335348	0.505414	-0.673993	-0.256806	0.149402	0.247405	0.320764	11	11	11	25.6	25.6	25.6	52.22	0	91.411	2899200000	121
EIF3F	Eukaryotic translation initiation factor 3 subunit F	O00303	O00303	+		NaN	0.0382258	NaN	0.00451152	NaN	-0.0427373	0.190407	0.216092	NaN	5	5	5	15.1	15.1	15.1	37.563	0	40.531	846050000	29
EIF3G	Eukaryotic translation initiation factor 3 subunit G	O75821	O75821			0.452871	-0.0897507	NaN	-0.0918488	-0.076033	-0.195239	0.052631	0.426805	NaN	7	7	7	24.7	24.7	24.7	35.611	0	90.715	2054400000	64
EIF3H	Eukaryotic translation initiation factor 3 subunit H	O15372	O15372	+		-0.0994876	-0.159874	-0.0130256	0.0775506	0.459633	-0.264796	-1.24368	0.193163	0.743189	9	9	9	29.5	29.5	29.5	39.93	0	88.015	1712500000	53
EIF3I	Eukaryotic translation initiation factor 3 subunit I	Q13347	Q13347			0.158978	-0.244514	0.175312	0.482718	-0.559349	-0.0131451	0.269528	0.118588	0.277451	7	7	7	22.8	22.8	22.8	36.501	0	80.015	1817400000	90
EIF3J	Eukaryotic translation initiation factor 3 subunit J	O75822-2;O75822;O75822-3	O75822-2;O75822;O75822-3			0.32748	-0.0170879	0.00943756	NaN	-0.31983	NaN	0.259649	0.836309	-0.387037	3	3	3	15.2	15.2	15.2	22.941	0	22.366	298810000	13
EIF3L	Eukaryotic translation initiation factor 3 subunit L	Q9Y262;Q9Y262-2	Q9Y262;Q9Y262-2			0.317196	-0.722136	0.439159	0.435337	-0.0606311	-0.408924	-0.12085	0.244959	1.17453	10	10	10	19	19	19	66.726	0	64.853	1642100000	77
EIF3M	Eukaryotic translation initiation factor 3 subunit M	Q7L2H7;Q7L2H7-2	Q7L2H7;Q7L2H7-2			NaN	0.118222	NaN	-1.12775	0.683553	0.325973	NaN	NaN	NaN	3	3	3	12	12	12	42.502	0	35.785	516010000	30
EIF4A1	Eukaryotic initiation factor 4A-I	P60842;P60842-2	P60842;P60842-2			0.029301	0.252648	-1.07675	0.391457	0.237936	0.165407	0.26721	0.172673	-1.33223	23	23	12	55.2	55.2	29.8	46.153	0	323.31	34376000000	519
EIF4A3	Eukaryotic initiation factor 4A-III;Eukaryotic initiation factor 4A-III, N-terminally processed	P38919	P38919			0.243911	-0.0559587	0.454265	0.358846	-0.629094	-0.371968	0.146693	0.0571012	0.687036	17	13	13	40.6	34.8	34.8	46.871	0	118.32	3496800000	144
EIF4G1	Eukaryotic translation initiation factor 4 gamma 1	Q04637-8;Q04637-7	Q04637-8;Q04637-7			0.171592	0.0138505	-0.724383	0.34089	0.0990251	0.0990251	0.0838788	0.107156	0.560436	27	27	1	19.8	19.8	0.6	175.62	0	270.76	6202800000	197
EIF4G2	Eukaryotic translation initiation factor 4 gamma 2	P78344-2;P78344	P78344-2;P78344			NaN	0.0102072	NaN	NaN	-0.0102072	NaN	0.666247	NaN	1.84397	5	5	5	5.4	5.4	5.4	98.149	0	33.084	304580000	9
EIF4H	Eukaryotic translation initiation factor 4H	Q15056-2;Q15056	Q15056-2;Q15056			0.396879	0.19507	NaN	NaN	-0.286753	-0.305197	-0.215061	-0.114424	NaN	4	4	4	22.8	22.8	22.8	25.2	0	28.91	1092800000	16
EIF5	Eukaryotic translation initiation factor 5	P55010	P55010			0.0830431	-0.0830431	NaN	NaN	NaN	NaN	-0.245543	0.292451	NaN	4	4	4	9.3	9.3	9.3	49.222	0	27.201	300210000	16
EIF5A;EIF5AL1	Eukaryotic translation initiation factor 5A-1;Eukaryotic translation initiation factor 5A-1-like	P63241;P63241-2;Q6IS14;Q9GZV4	P63241;P63241-2;Q6IS14			0.0179774	-0.414953	-0.820566	0.745843	0.469594	0.00210444	0.256619	0.226157	-0.938039	11	11	11	88.3	88.3	88.3	16.832	0	108.7	8811700000	149
EIF5B	Eukaryotic translation initiation factor 5B	O60841	O60841			0.477916	0.0710781	NaN	0.384921	-0.719808	-0.214107	-0.0262959	0.199958	NaN	10	10	10	11.4	11.4	11.4	138.83	0	94.713	1345600000	56
ELAC2	Zinc phosphodiesterase ELAC protein 2	Q9BQ52-4;Q9BQ52;Q9BQ52-3;Q9BQ52-2	Q9BQ52-4;Q9BQ52;Q9BQ52-3;Q9BQ52-2			0.113966	0.281221	NaN	-0.222937	-0.236784	0.0645348	0.752205	0.681535	NaN	4	4	4	6.9	6.9	6.9	87.563	0	36.51	590170000	33
ELAVL1	ELAV-like protein 1	Q15717;Q15717-2;Q12926-2;Q12926;P26378-4;P26378-2;P26378-5;P26378;P26378-3	Q15717;Q15717-2			-0.513012	-0.385822	0.13263	0.678898	-0.0659005	0.153206	0.104641	0.0328029	0.169537	6	6	6	18.1	18.1	18.1	36.091	0	44.264	1124700000	26
ENAH	Protein enabled homolog	Q8N8S7-3;Q8N8S7-2;Q8N8S7;Q9UI08-4;Q9UI08	Q8N8S7-3;Q8N8S7-2;Q8N8S7			-0.239078	NaN	NaN	0.241529	0.0805407	-0.0829916	0.0392237	-0.136432	NaN	4	4	4	10.1	10.1	10.1	60.348	0	30.308	485840000	11
ENO1	Alpha-enolase	P06733;P06733-2;P13929-3;P13929-2;P13929	P06733;P06733-2			-0.3952	0.260274	-0.349002	-0.240789	0.349997	0.37472	0.0942046	-0.168817	-0.37441	21	21	20	61.5	61.5	57.4	47.168	0	323.31	79960000000	812
EPB41L2	Band 4.1-like protein 2	O43491;O43491-4;O43491-3;O43491-2	O43491;O43491-4;O43491-3;O43491-2			0.134395	0.0229692	0.0605211	0.336654	-0.268153	-0.286386	0.36461	0.0516653	0.219075	9	9	9	8.3	8.3	8.3	112.59	0	57.068	545900000	23
EPB41L3	Band 4.1-like protein 3;Band 4.1-like protein 3, N-terminally processed	Q9Y2J2-2;Q9Y2J2-4;Q9Y2J2;Q9Y2J2-3	Q9Y2J2-2;Q9Y2J2-4;Q9Y2J2;Q9Y2J2-3			0.502969	0.0261704	-0.266093	0.435096	-0.333556	-0.364588	0.590454	0.232023	NaN	8	8	8	12	12	12	96.513	0	82.607	1102700000	42
EPHX1	Epoxide hydrolase 1	P07099	P07099			0.373965	-0.373965	NaN	NaN	NaN	NaN	0.377051	0.219298	NaN	3	3	3	7	7	7	52.948	0	17.142	427770000	14
EPRS	Bifunctional glutamate/proline--tRNA ligase;Glutamate--tRNA ligase;Proline--tRNA ligase	P07814	P07814			0.226747	-0.374209	0.29647	0.315841	-0.272608	-0.19224	-0.521197	-0.33507	0.260805	14	13	13	10.4	9.9	9.9	170.59	0	111.99	2086100000	110
ERH	Enhancer of rudimentary homolog	P84090	P84090			0.40213	-0.472792	NaN	0.205378	-0.113462	-0.0212536	0.217396	0.492586	NaN	2	2	2	21.2	21.2	21.2	12.259	0	124.53	858050000	42
ERO1L	ERO1-like protein alpha	Q96HE7	Q96HE7			0.201853	0.0329952	-0.0542736	0.063364	-0.204136	-0.0398026	0.133623	1.03076	NaN	4	4	3	9.4	9.4	7.1	54.392	0	28.543	553530000	17
ESYT1	Extended synaptotagmin-1	Q9BSJ8;Q9BSJ8-2	Q9BSJ8;Q9BSJ8-2			0.628808	0.0774792	NaN	-0.809039	-0.0356972	0.138449	0.428141	0.0880421	NaN	9	9	9	11.2	11.2	11.2	122.85	0	73.951	831070000	56
ETF1	Eukaryotic peptide chain release factor subunit 1	P62495;P62495-2	P62495;P62495-2			0.329699	-0.202362	NaN	0.369453	0.0832882	-0.580078	-0.109898	0.162832	NaN	7	7	7	16.9	16.9	16.9	49.03	0	57.936	1291800000	37
ETFA	Electron transfer flavoprotein subunit alpha, mitochondrial	P13804-2;P13804	P13804-2;P13804			-0.0570293	0.295391	NaN	-0.793565	0.764498	-0.209295	-0.103565	0.492697	NaN	8	8	8	35.6	35.6	35.6	30.025	0	63.484	986630000	40
ETFB	Electron transfer flavoprotein subunit beta	P38117;P38117-2	P38117;P38117-2			0.646184	0.0124615	NaN	0.0400017	-0.446466	-0.252181	0.0167034	0.590325	NaN	8	8	8	32.2	32.2	32.2	27.843	0	54.337	1055300000	49
EWSR1	RNA-binding protein EWS	Q01844-2;Q01844-6;Q01844-3;Q01844;Q01844-5	Q01844-2;Q01844-6;Q01844-3;Q01844;Q01844-5			0.0359697	-0.0359697	NaN	NaN	NaN	NaN	NaN	0.0193262	NaN	2	2	2	3.9	3.9	3.9	61.217	0.00074738	14.311	720600000	26
EZR	Ezrin	P15311	P15311			-0.0646687	0.0444546	0.0428486	0.381666	0.278433	-0.682734	0.237526	0.370909	0.451397	17	10	9	28.2	17.4	16	69.412	0	130.41	4141900000	121
FABP5	Fatty acid-binding protein, epidermal	Q01469	Q01469			0.229256	1.12472	0.467557	NaN	-0.868358	-0.953174	0.927295	-0.52387	0.833701	3	3	3	20	20	20	15.164	0	22.655	458880000	26
FAM120A	Constitutive coactivator of PPAR-gamma-like protein 1	Q9NZB2;Q9NZB2-6;Q9NZB2-4;Q9NZB2-2;Q9NZB2-5	Q9NZB2;Q9NZB2-6;Q9NZB2-4;Q9NZB2-2;Q9NZB2-5			NaN	NaN	NaN	0.286938	-0.111667	-0.175271	NaN	NaN	NaN	7	7	7	8.5	8.5	8.5	121.89	0	51.018	356420000	17
FAM129A	Protein Niban	Q9BZQ8	Q9BZQ8			0.158314	-0.0448586	0.100926	0.206345	-0.333234	-0.0874917	0.082106	0.26112	0.102152	4	4	4	4.5	4.5	4.5	103.13	0	43.6	293480000	13
FAM98B	Protein FAM98B	Q52LJ0;Q52LJ0-2	Q52LJ0;Q52LJ0-2			NaN	-0.202773	NaN	0.264472	NaN	-0.0616983	0.334746	0.176129	NaN	3	3	3	12.1	12.1	12.1	37.19	0	32.096	586240000	10
FANCD2	Fanconi anemia group D2 protein	Q9BXW9;Q9BXW9-1;Q9BXW9-3;Q9BXW9-4	Q9BXW9;Q9BXW9-1;Q9BXW9-3			NaN	-0.358356	NaN	0.358356	NaN	NaN	-0.0497017	0.239349	1.24447	5	5	5	4.3	4.3	4.3	164.13	0	32.996	565160000	11
FANCI	Fanconi anemia group I protein	Q9NVI1;Q9NVI1-2;Q9NVI1-1;Q9NVI1-4	Q9NVI1;Q9NVI1-2;Q9NVI1-1			0.487754	0.0698372	NaN	-1.1018	0.198837	0.345369	0.610853	0.623478	0.520881	11	11	11	10.5	10.5	10.5	149.32	0	72.527	593630000	17
FARSA	Phenylalanine--tRNA ligase alpha subunit	Q9Y285-2;Q9Y285	Q9Y285-2;Q9Y285			0.11473	-0.0960262	NaN	0.0381405	0.271234	-0.328078	0.222427	-0.0180157	NaN	6	6	6	14.7	14.7	14.7	54.157	0	48.606	603410000	39
FARSB	Phenylalanine--tRNA ligase beta subunit	Q9NSD9;Q9NSD9-2	Q9NSD9;Q9NSD9-2			-0.0446999	-0.116588	NaN	-0.685191	0.793267	0.053212	-0.258605	0.081332	0.498523	10	10	10	16.3	16.3	16.3	66.115	0	68.117	1379100000	61
FASN	Fatty acid synthase;[Acyl-carrier-protein] S-acetyltransferase;[Acyl-carrier-protein] S-malonyltransferase;3-oxoacyl-[acyl-carrier-protein] synthase;3-oxoacyl-[acyl-carrier-protein] reductase;3-hydroxyacyl-[acyl-carrier-protein] dehydratase;Enoyl-[acyl-carrier-protein] reductase;Oleoyl-[acyl-carrier-protein] hydrolase	P49327	P49327			0.118391	-0.162993	0.161867	-0.0176814	-0.346911	0.247327	-0.362442	-0.563633	0.154382	68	68	68	34	34	34	273.42	0	323.31	33417000000	810
FAU	40S ribosomal protein S30	P62861	P62861			-0.131531	-0.0796337	NaN	NaN	0.00787926	0.203285	0.234192	0.597797	NaN	2	2	2	18.6	18.6	18.6	6.6478	0.00076923	15.303	1451900000	21
FDPS	Farnesyl pyrophosphate synthase	P14324-2;P14324	P14324-2;P14324			0.100117	-0.100117	NaN	NaN	NaN	NaN	0.158512	NaN	NaN	4	4	4	14.2	14.2	14.2	40.532	0	30.588	909080000	14
FEN1	Flap endonuclease 1	P39748;P39748-2	P39748;P39748-2			0.363652	0.0262554	NaN	0.574231	-0.561002	-0.403136	0.891997	1.1833	NaN	4	4	3	12.9	12.9	11.1	42.592	0	33.466	734670000	19
FHL1	Four and a half LIM domains protein 1	Q13642-3;Q13642-1;Q13642-5;Q13642-4;Q13642	Q13642-3;Q13642-1;Q13642-5;Q13642-4;Q13642			-0.144569	-0.0575576	NaN	0.515347	NaN	-0.313221	-0.0578399	0.166356	NaN	3	3	3	16.5	16.5	16.5	22.017	0	32.088	983510000	40
FIS1	Mitochondrial fission 1 protein	Q9Y3D6	Q9Y3D6			NaN	0.468693	NaN	-0.421623	0.209217	-0.256287	NaN	NaN	NaN	2	2	2	15.8	15.8	15.8	16.937	0.00077459	15.76	211090000	12
FKBP1A	Peptidyl-prolyl cis-trans isomerase FKBP1A	P62942	P62942			-0.250462	0.0411812	NaN	0.427902	-0.17519	-0.0434307	0.37891	-0.0425152	NaN	2	2	2	25	25	25	11.951	0	76.339	1738300000	48
FKBP3	Peptidyl-prolyl cis-trans isomerase FKBP3	Q00688	Q00688			-0.294634	0.189817	0.605085	0.181888	-0.201601	-0.480555	-0.00952943	-0.117922	1.03038	5	5	5	23.2	23.2	23.2	25.177	0	44.239	1961400000	79
FKBP4	Peptidyl-prolyl cis-trans isomerase FKBP4;Peptidyl-prolyl cis-trans isomerase FKBP4, N-terminally processed	Q02790	Q02790			0.19053	0.130827	0.72163	-0.373272	-0.361868	-0.307846	0.372289	0.658497	1.04792	19	19	19	50.3	50.3	50.3	51.804	0	241.22	8700100000	184
FLNA	Filamin-A	P21333-2;P21333;Q14315-2;Q14315	P21333-2;P21333			0.0906248	-0.31449	0.0954752	0.242888	-0.298142	0.183644	-0.44052	-0.540221	-0.00495815	77	77	71	38.6	38.6	36.9	280.01	0	323.31	36205000000	903
FLNB	Filamin-B	O75369-6;O75369-3;O75369-2;O75369-9;O75369;O75369-8;O75369-5;O75369-4;O75369-7	O75369-6;O75369-3;O75369-2;O75369-9;O75369;O75369-8;O75369-5;O75369-4;O75369-7			0.00514634	-0.822836	0.450499	0.602623	0.0753234	-0.310756	-0.537843	-0.52635	0.457619	14	8	8	5	3.3	3.3	271.41	0	50.894	607660000	36
FLOT1	Flotillin-1	O75955-2;O75955	O75955-2;O75955			0.414693	0.0141633	0.00602468	0.167985	-0.267556	-0.335311	0.825023	0.467075	NaN	2	2	2	5.5	5.5	5.5	42.08	0	31.75	248060000	18
FLOT2	Flotillin-2	Q14254	Q14254			0.544412	0.125126	-0.0469478	0.61235	-0.815424	-0.419516	0.320509	0.527675	0.785921	7	7	7	16.8	16.8	16.8	47.064	0	49.977	1086400000	42
FMR1	Fragile X mental retardation protein 1	Q06787-6;Q06787-2;Q06787-4;Q06787-7;Q06787-8;Q06787-5;Q06787-9;Q06787-3;Q06787;Q06787-11;Q06787-10	Q06787-6;Q06787-2;Q06787-4;Q06787-7;Q06787-8;Q06787-5;Q06787-9;Q06787-3;Q06787;Q06787-11;Q06787-10			0.0742251	0.296565	0.592326	-0.194145	-0.240501	-0.52847	0.190077	-0.0512021	0.818186	7	5	5	13.7	9.2	9.2	66.459	0	39.27	646850000	33
FN3KRP	Ketosamine-3-kinase	Q9HA64	Q9HA64			0.3266	NaN	NaN	-0.261144	0.168862	-0.234319	-0.130994	-0.348136	NaN	7	7	7	26.2	26.2	26.2	34.412	0	65.001	1103600000	22
FSCN1	Fascin	Q16658	Q16658			-0.360977	-0.196136	0.623857	0.077774	0.187546	-0.332064	-0.279222	-0.461035	0.048542	17	17	17	36.3	36.3	36.3	54.529	0	133.24	8502300000	178
FUBP1	Far upstream element-binding protein 1	Q96AE4;Q96AE4-2	Q96AE4;Q96AE4-2			0.229464	-0.042045	0.089297	0.184271	-0.0232824	-0.437705	0.169568	0.0788066	0.400843	12	11	11	21.7	20.7	20.7	67.56	0	100.86	3981800000	123
FUBP3	Far upstream element-binding protein 3	Q96I24;Q96I24-2	Q96I24			0.0787331	-0.450285	NaN	0.573528	0.139818	-0.341793	0.333545	-0.0744766	0.493669	11	11	11	23.1	23.1	23.1	61.64	0	77.243	1531100000	38
FUS	RNA-binding protein FUS	P35637-2;P35637;Q92804-2;Q92804	P35637-2;P35637			-0.107323	0.112333	NaN	0.742255	-0.730166	-0.0170982	0.409667	0.227809	NaN	5	5	5	11.6	11.6	11.6	53.354	0	48.299	1622600000	46
FXR2	Fragile X mental retardation syndrome-related protein 2	P51116	P51116			0.514539	-0.324744	-0.0977103	0.315317	-0.195615	-0.211787	0.0129999	0.045255	0.175037	8	8	5	15.5	15.5	10.3	74.222	0	73.723	2178200000	62
G3BP1	Ras GTPase-activating protein-binding protein 1	Q13283;Q13283-2	Q13283			0.192141	0.324852	NaN	-0.399166	0.18607	-0.303897	0.257597	0.221877	NaN	9	9	8	26.4	26.4	23.8	52.164	0	78.001	1686800000	62
G6PD	Glucose-6-phosphate 1-dehydrogenase	P11413;P11413-2;P11413-3	P11413;P11413-2;P11413-3			0.293737	-0.230167	0.143217	0.357267	-0.453835	-0.11022	0.115028	-0.000165939	0.252251	11	11	11	21.2	21.2	21.2	59.256	0	81.708	2114700000	79
GALK1	Galactokinase	P51570;P51570-2	P51570;P51570-2			-0.0593619	0.107605	NaN	NaN	-0.153289	0.105046	0.0635915	0.445389	NaN	5	5	5	14	14	14	42.272	0	32.535	426680000	13
GANAB	Neutral alpha-glucosidase AB	Q14697;Q14697-3	Q14697			0.273227	-0.120173	0.126735	0.217361	-0.287596	-0.209553	0.0490793	0.0311654	0.0605424	31	31	1	34.3	34.3	2.2	106.87	0	323.31	12676000000	325
GAPDH	Glyceraldehyde-3-phosphate dehydrogenase	P04406;P04406-2;O14556	P04406;P04406-2			-0.271842	0.290168	-0.116433	-0.300639	0.0214777	0.377269	-0.00120449	0.0442781	-0.157556	16	16	16	66.3	66.3	66.3	36.053	0	323.31	54279000000	468
GAPVD1	GTPase-activating protein and VPS9 domain-containing protein 1	Q14C86-4;Q14C86-5;Q14C86-2;Q14C86;Q14C86-6;Q14C86-3	Q14C86-4;Q14C86-5;Q14C86-2;Q14C86;Q14C86-6;Q14C86-3			0.125841	-0.174225	NaN	NaN	0.0985332	-0.0501485	0.637863	0.105403	NaN	4	4	4	2.8	2.8	2.8	160.6	0	28.67	223940000	11
GARS	Glycine--tRNA ligase	P41250	P41250			0.386212	0.0207793	-0.108777	-0.114461	0.0196597	-0.203412	0.318194	0.135499	-0.2301	16	16	16	27.7	27.7	27.7	83.165	0	120.87	3071800000	100
GART	Trifunctional purine biosynthetic protein adenosine-3;Phosphoribosylamine--glycine ligase;Phosphoribosylformylglycinamidine cyclo-ligase;Phosphoribosylglycinamide formyltransferase	P22102;P22102-2	P22102;P22102-2			0.275086	0.0473318	-0.573504	0.382022	-0.26714	0.136205	0.35325	0.34822	-0.464244	19	19	19	22.2	22.2	22.2	107.77	0	142.11	3968800000	156
GCLM	Glutamate--cysteine ligase regulatory subunit	P48507-2;P48507	P48507-2;P48507			-0.0643387	0.0643387	NaN	NaN	NaN	NaN	0.0369968	NaN	NaN	2	2	2	9.1	9.1	9.1	28.135	0.00071994	13.304	150590000	4
GCN1L1	Translational activator GCN1	Q92616	Q92616			0.339912	-0.138316	0.0692571	-0.109706	0.00494321	-0.166091	0.163705	0.400495	0.947872	32	32	32	12.8	12.8	12.8	292.75	0	232.12	5281500000	121
GDI1	Rab GDP dissociation inhibitor alpha	P31150	P31150			0.327317	0.263703	-0.339353	0.357956	-0.412111	-0.197511	0.288418	0.483301	NaN	12	5	5	31.8	14.8	14.8	50.582	0	57.078	1264700000	66
GDI2	Rab GDP dissociation inhibitor beta	P50395;P50395-2	P50395;P50395-2			-0.451005	0.378117	0.108155	-0.218833	-0.0157827	0.199349	0.177764	0.0843836	-0.557193	21	21	14	55.1	55.1	38	50.663	0	305.85	14741000000	306
GFPT1	Glutamine--fructose-6-phosphate aminotransferase [isomerizing] 1	Q06210-2;Q06210;O94808	Q06210-2;Q06210			0.607818	0.73947	-1.64805	-0.00231266	0.250016	0.0530577	0.463611	0.100408	-1.93997	17	17	17	29.5	29.5	29.5	76.758	0	159.22	3669300000	163
GLO1	Lactoylglutathione lyase	Q04760;Q04760-2	Q04760;Q04760-2			0.00665379	0.13236	-0.677775	0.198812	0.280641	0.05931	0.254613	0.296147	-2.02594	10	10	10	71.7	71.7	71.7	20.777	0	94.545	6273600000	140
GLOD4	Glyoxalase domain-containing protein 4	Q9HC38-2;Q9HC38;Q9HC38-3	Q9HC38-2;Q9HC38			0.37125	0.289392	-0.653928	-0.29065	0.249879	0.034057	0.600139	0.750898	0.534431	8	8	8	29.5	29.5	29.5	33.232	0	55.681	1837500000	44
GLRX3	Glutaredoxin-3	O76003	O76003			0.24339	0.294083	-0.652604	0.213946	-0.109689	0.0108744	0.428326	0.339799	NaN	7	7	7	23.9	23.9	23.9	37.432	0	59.284	2858300000	109
GLS	Glutaminase kidney isoform, mitochondrial	O94925-3;O94925;O94925-2	O94925-3;O94925;O94925-2			NaN	NaN	NaN	0.31608	-0.31608	NaN	NaN	0.427059	NaN	3	3	3	7.4	7.4	7.4	65.459	0	23.5	507460000	17
GLUD1;GLUD2	Glutamate dehydrogenase 1, mitochondrial;Glutamate dehydrogenase 2, mitochondrial	P00367;P00367-3;P00367-2;P49448	P00367;P00367-3;P00367-2;P49448			0.6058	0.0655527	-0.524041	0.243026	-0.315791	-0.0745459	0.294456	0.21271	-0.985868	12	12	12	22.9	22.9	22.9	61.397	0	119.82	3576300000	138
GMPS	GMP synthase [glutamine-hydrolyzing]	P49915;P49915-2	P49915;P49915-2			0.2766	0.136966	-0.390276	0.266143	-0.319884	0.0304505	0.0765912	0.31069	-0.215292	13	13	13	23.1	23.1	23.1	76.715	0	98.149	1989200000	83
GNAI2;GNAI1;GNAI3;GNAT1;GNAO1;GNAT2;GNAT3	Guanine nucleotide-binding protein G(i) subunit alpha-2;Guanine nucleotide-binding protein G(i) subunit alpha-1;Guanine nucleotide-binding protein G(k) subunit alpha;Guanine nucleotide-binding protein G(t) subunit alpha-1;Guanine nucleotide-binding protein G(o) subunit alpha;Guanine nucleotide-binding protein G(t) subunit alpha-2;Guanine nucleotide-binding protein G(t) subunit alpha-3	P04899;P04899-4;P04899-6;P04899-3;P04899-5;P04899-2;P63096;P08754;P63096-2;P11488;P09471-2;P09471;P19087;A8MTJ3;P38405-3	P04899;P04899-4;P04899-6;P04899-3;P04899-5;P04899-2;P63096;P08754;P63096-2;P11488;P09471-2;P09471;P19087;A8MTJ3			NaN	NaN	NaN	0	NaN	NaN	-0.200687	-0.200466	NaN	4	3	3	11.8	8.7	8.7	40.45	0	19.644	324590000	11
GNAS	Guanine nucleotide-binding protein G(s) subunit alpha isoforms short;Guanine nucleotide-binding protein G(s) subunit alpha isoforms XLas	P63092-3;P63092-2;P63092;P63092-4;Q5JWF2-2;Q5JWF2;P38405;P38405-2	P63092-3;P63092-2;P63092;P63092-4;Q5JWF2-2;Q5JWF2			0.451068	-0.019532	NaN	-0.0106857	-0.444407	0.0235569	0.582992	0.766965	NaN	5	5	4	14.5	14.5	11.6	44.179	0	37.901	1613600000	44
GNB2;GNB4	Guanine nucleotide-binding protein G(I)/G(S)/G(T) subunit beta-2;Guanine nucleotide-binding protein subunit beta-4	P62879;Q9HAV0	P62879;Q9HAV0			0.396069	-0.345913	0.172924	NaN	-0.0526371	-0.170443	-0.0855408	NaN	NaN	5	5	1	13.5	13.5	2.1	37.331	0	40.216	1199100000	22
GNB2L1	Guanine nucleotide-binding protein subunit beta-2-like 1;Guanine nucleotide-binding protein subunit beta-2-like 1, N-terminally processed	P63244	P63244			-0.00734806	0.0711298	0.162633	-0.155892	-0.251575	0.181052	0.382298	-0.078105	-0.872146	14	14	14	49.2	49.2	49.2	35.076	0	201.95	17561000000	268
GNL1	Guanine nucleotide-binding protein-like 1	P36915;P36915-2	P36915;P36915-2			-0.235749	0.1632	0.505981	0.364092	-0.399859	-0.397665	0.276292	0.139921	0.728113	4	4	4	6.6	6.6	6.6	68.66	0	30.89	202890000	13
GOPC	Golgi-associated PDZ and coiled-coil motif-containing protein	Q9HD26-2;Q9HD26;Q9HD26-3	Q9HD26-2;Q9HD26;Q9HD26-3			-0.248835	0.0460925	0.130918	NaN	NaN	0.0718246	-0.200232	-0.0367112	0.774631	5	5	5	10.8	10.8	10.8	49.721	0	35.608	428880000	13
GOT1	Aspartate aminotransferase, cytoplasmic	P17174;P17174-2	P17174;P17174-2			0.00559616	0.00721169	-0.145309	0.15377	0.167236	-0.188505	0.149124	0.527176	0.300169	13	13	13	39.5	39.5	39.5	46.247	0	91.313	1925800000	58
GOT2	Aspartate aminotransferase, mitochondrial	P00505;P00505-2	P00505;P00505-2			0.419923	0.682687	-1.2225	0.0491759	-0.14503	0.215741	0.761578	0.83352	-0.616397	15	15	15	34	34	34	47.517	0	217.99	11131000000	173
GPHN	Gephyrin;Molybdopterin adenylyltransferase;Molybdopterin molybdenumtransferase	Q9NQX3;Q9NQX3-2	Q9NQX3;Q9NQX3-2			NaN	NaN	NaN	NaN	NaN	0	0.375818	NaN	0.372976	2	2	2	3.1	3.1	3.1	79.748	0.00069686	12.578	165250000	5
GPI	Glucose-6-phosphate isomerase	P06744;P06744-2;CON__Q3ZBD7;Q8N196	P06744;P06744-2			-0.0564607	0.0996577	-0.438466	0.420176	-0.110711	0.0858046	0.228017	0.150458	-0.131099	17	17	17	35.8	35.8	35.8	63.146	0	273.33	30173000000	363
GPS1	COP9 signalosome complex subunit 1	Q13098-5;Q13098;Q13098-7;Q13098-6	Q13098-5;Q13098;Q13098-7;Q13098-6			0.262985	-0.437382	0.225542	0.355114	-0.180331	-0.225928	-0.0539859	0.533392	0.811233	4	4	4	9	9	9	55.092	0	34.416	740680000	38
GRHPR	Glyoxylate reductase/hydroxypyruvate reductase	Q9UBQ7	Q9UBQ7			NaN	NaN	NaN	-0.490862	0.490862	NaN	NaN	NaN	NaN	4	4	4	13.1	13.1	13.1	35.668	0	29.644	158550000	24
GRPEL1	GrpE protein homolog 1, mitochondrial	Q9HAV7	Q9HAV7			0.185155	0.0884905	0.156741	-0.272674	-0.0714941	-0.0862188	0.287801	0.705878	0.306233	4	4	4	18.9	18.9	18.9	24.279	0	24.802	616740000	11
GSK3A	Glycogen synthase kinase-3 alpha	P49840	P49840			NaN	NaN	NaN	0.0887156	NaN	-0.0887156	NaN	NaN	NaN	3	3	3	8.1	8.1	8.1	50.98	0	21.075	294910000	10
GSPT1;GSPT2	Eukaryotic peptide chain release factor GTP-binding subunit ERF3A;Eukaryotic peptide chain release factor GTP-binding subunit ERF3B	P15170-2;P15170-3;P15170;Q8IYD1	P15170-2;P15170-3;P15170;Q8IYD1			0.463999	-0.168386	-0.226519	0.520586	-0.331778	-0.257902	0.497557	0.270061	0.42317	10	10	10	16.4	16.4	16.4	68.6	0	91.111	2589400000	122
GSR	Glutathione reductase, mitochondrial	P00390-5;P00390-4;P00390-2;P00390-3;P00390	P00390-5;P00390-4;P00390-2;P00390-3;P00390			0.712581	-0.475411	NaN	0.0233051	-0.270594	0.0101196	0.502099	0.499625	NaN	4	4	4	14.1	14.1	14.1	47.267	0	39.651	921470000	37
GSTO1	Glutathione S-transferase omega-1	P78417;P78417-3;P78417-2	P78417;P78417-3;P78417-2			-0.0449781	-0.0341082	-0.228692	0.223077	0.0379095	0.046792	-0.00781536	0.352731	-0.984159	11	11	11	39	39	39	27.566	0	115.16	4951300000	123
GSTP1	Glutathione S-transferase P	P09211	P09211			-0.205949	0.454779	NaN	-0.857356	0.331429	0.277097	-0.637237	-0.362273	NaN	8	8	8	57.1	57.1	57.1	23.356	0	162.27	5013800000	109
GTF2I	General transcription factor II-I	P78347-2;P78347-4;P78347-3;P78347;P78347-5;Q86UP8-3;Q86UP8;Q6EKJ0	P78347-2;P78347-4;P78347-3;P78347			0.480072	0.0381752	NaN	0.117801	-0.203143	-0.432906	0.125215	0.216163	NaN	12	12	12	14.1	14.1	14.1	107.97	0	85.437	1365600000	28
HACD3	Very-long-chain (3R)-3-hydroxyacyl-CoA dehydratase 3	Q9P035;Q9P035-2	Q9P035			NaN	0.374398	NaN	-1.17657	0.546407	0.255765	0.21663	0.457967	NaN	7	7	7	22.9	22.9	22.9	43.159	0	56.098	1992100000	52
HADHA	Trifunctional enzyme subunit alpha, mitochondrial;Long-chain enoyl-CoA hydratase;Long chain 3-hydroxyacyl-CoA dehydrogenase	P40939	P40939			0.0295556	0.345716	-0.189992	0.237291	-0.268708	-0.153863	0.426772	0.311595	0.74106	15	15	15	23.9	23.9	23.9	82.999	0	117.25	3441400000	81
HADHB	Trifunctional enzyme subunit beta, mitochondrial;3-ketoacyl-CoA thiolase	P55084-2;P55084	P55084-2;P55084			0	NaN	NaN	NaN	NaN	NaN	0.118683	0.025034	NaN	4	4	4	9.5	9.5	9.5	48.879	0	28.484	283310000	12
HARS	Histidine--tRNA ligase, cytoplasmic	P12081-4;P12081;P12081-3;P12081-2;P49590-2;P49590	P12081-4;P12081;P12081-3;P12081-2			0.311512	0.083408	-0.142023	0.019117	-0.0107673	-0.261246	0.122638	0.265802	NaN	13	13	13	28	28	28	54.846	0	124.07	3069300000	102
HAT1	Histone acetyltransferase type B catalytic subunit	O14929-2;O14929	O14929-2;O14929			NaN	0.193051	NaN	-0.484633	0.258832	0.0327501	-0.266648	NaN	NaN	3	3	3	11.4	11.4	11.4	39.786	0	57.895	644640000	23
HCFC1	Host cell factor 1;HCF N-terminal chain 1;HCF N-terminal chain 2;HCF N-terminal chain 3;HCF N-terminal chain 4;HCF N-terminal chain 5;HCF N-terminal chain 6;HCF C-terminal chain 1;HCF C-terminal chain 2;HCF C-terminal chain 3;HCF C-terminal chain 4;HCF C-terminal chain 5;HCF C-terminal chain 6	P51610-2;P51610;P51610-4;P51610-3;Q9Y5Z7	P51610-2;P51610;P51610-4;P51610-3			0.11994	-0.220085	0.162189	-0.00789261	0.4324	-0.486551	-0.291592	0.328827	0.457781	6	6	6	3.7	3.7	3.7	201.85	0	42.435	615150000	32
HDAC2	Histone deacetylase 2	Q92769-3;Q92769	Q92769-3;Q92769			0.265308	-0.289465	-0.100834	0.211088	0.119459	-0.205557	0.235878	0.389456	-0.0983982	6	6	4	17	17	11.8	51.998	0	50.074	1650800000	79
HDGFRP2	Hepatoma-derived growth factor-related protein 2	Q7Z4V5-2;Q7Z4V5;Q7Z4V5-4;Q7Z4V5-3	Q7Z4V5-2;Q7Z4V5;Q7Z4V5-4;Q7Z4V5-3			0.18009	0.126534	NaN	0.312546	-0.619169	NaN	0.863188	0.296909	-0.301802	5	5	5	11.9	11.9	11.9	74.229	0	44.004	586370000	17
HDLBP	Vigilin	Q00341;Q00341-2	Q00341;Q00341-2			0.196359	-0.029452	0.0242875	0.484304	-0.3207	-0.354798	-0.237628	-0.0795752	0.370818	23	23	23	22.3	22.3	22.3	141.45	0	177.19	3307700000	136
HIBCH	3-hydroxyisobutyryl-CoA hydrolase, mitochondrial	Q6NVY1;Q6NVY1-2	Q6NVY1			-1.30654	NaN	NaN	NaN	0.955219	0.35132	NaN	NaN	NaN	3	3	3	8.3	8.3	8.3	43.482	0	19.806	316120000	10
HINT1	Histidine triad nucleotide-binding protein 1	P49773	P49773			0.329131	-0.0157121	0.100249	0.671618	-0.826474	-0.258811	0.357876	0.378752	-0.0345758	4	4	4	23.8	23.8	23.8	13.802	0	23.249	2599900000	36
HIST1H1C	Histone H1.2	P16403	P16403			0.619535	0.0417252	0.0398788	0.372707	-1.04412	-0.029726	-0.256891	-0.176929	-0.751287	7	7	3	26.8	26.8	9.9	21.364	0	62.219	2144400000	73
HIST1H4A	Histone H4	P62805	P62805			0.37487	0.0318505	0.0114953	0.584385	-0.436177	-0.566424	0.975698	-0.256974	NaN	6	6	6	57.3	57.3	57.3	11.367	0	44.973	2478400000	84
HK1	Hexokinase-1	P19367-4;P19367-2;P19367;P19367-3;P52789;Q2TB90;Q2TB90-3;Q2TB90-2;P52790	P19367-4;P19367-2;P19367;P19367-3			0.296281	0.0107676	0.243956	-0.0541395	-0.562	0.0651347	0.204873	0.287568	0.308264	19	19	19	20.9	20.9	20.9	101.08	0	140.98	2266100000	90
HLA-C;HLA-B	HLA class I histocompatibility antigen, Cw-7 alpha chain;HLA class I histocompatibility antigen, B-73 alpha chain;HLA class I histocompatibility antigen, Cw-17 alpha chain	P10321;Q31612;Q95604;P30499	P10321;Q31612;Q95604			0.154273	-0.0269823	0.295081	0.0872774	-0.248355	-0.261294	0.560899	0.882817	NaN	6	6	1	22.1	22.1	3	40.648	0	85.961	1592100000	52
HLCS	Biotin--protein ligase;Biotin--[methylmalonyl-CoA-carboxytransferase] ligase;Biotin--[propionyl-CoA-carboxylase [ATP-hydrolyzing]] ligase;Biotin--[methylcrotonoyl-CoA-carboxylase] ligase;Biotin--[acetyl-CoA-carboxylase] ligase	P50747	P50747			NaN	NaN	NaN	0.0613956	0.199577	-0.260973	NaN	NaN	NaN	3	3	3	3.9	3.9	3.9	80.759	0	19.581	293010000	6
HM13	Minor histocompatibility antigen H13	Q8TCT9-5;Q8TCT9;Q8TCT9-4;Q8TCT9-2	Q8TCT9-5;Q8TCT9;Q8TCT9-4;Q8TCT9-2			NaN	-0.151457	NaN	0.431705	-0.164946	-0.115303	0.314541	0.374504	NaN	4	4	4	15.8	15.8	15.8	36.813	0	53.24	942530000	37
HMGB1;HMGB1P1	High mobility group protein B1;Putative high mobility group protein B1-like 1	P09429;B2RPK0	P09429;B2RPK0			-0.926422	-0.217362	NaN	1.07782	0.0802322	-0.0142654	0.268392	-0.415923	NaN	8	8	8	27	27	27	24.893	0	105.39	4578900000	78
HMGB2	High mobility group protein B2	P26583	P26583			-0.098327	0.00609652	-0.593467	0.83231	-0.139697	-0.00691541	-0.115552	0.0569655	-0.789764	3	3	3	18.2	18.2	18.2	24.033	0	26.879	1995600000	50
HMGB3	High mobility group protein B3	O15347	O15347			-0.266054	0.266054	NaN	NaN	NaN	NaN	0.0768471	0.0875168	NaN	2	2	2	13	13	13	22.98	0.00076161	14.953	744340000	7
HMGCS1	Hydroxymethylglutaryl-CoA synthase, cytoplasmic	Q01581;P54868-3;P54868-2;P54868	Q01581			0.156348	0.00628312	0.346653	-0.232013	-0.261558	-0.0157124	0.886092	0.984215	0.786791	18	18	18	43.8	43.8	43.8	57.293	0	275.99	13434000000	215
HMOX2	Heme oxygenase 2	P30519	P30519			0.990119	NaN	NaN	0.579129	-0.284704	-1.28454	3.14831	2.94173	2.7603	15	15	2	65.5	65.5	8.9	36.032	0	255.37	7673800000	166
HNRNPA0	Heterogeneous nuclear ribonucleoprotein A0	Q13151	Q13151			NaN	-0.509673	NaN	-0.135711	0.622666	0.0227175	NaN	NaN	NaN	4	4	4	21	21	21	30.84	0	44.149	713570000	30
HNRNPA1;HNRNPA1L2	Heterogeneous nuclear ribonucleoprotein A1;Heterogeneous nuclear ribonucleoprotein A1, N-terminally processed;Heterogeneous nuclear ribonucleoprotein A1-like 2	P09651-3;P09651-2;P09651;Q32P51	P09651-3;P09651-2;P09651;Q32P51			0.165859	-0.544966	0.00486533	0.272558	0.188194	-0.08651	0.260374	-0.104153	-0.655102	11	11	11	52.1	52.1	52.1	29.386	0	115.44	11399000000	226
HNRNPA2B1	Heterogeneous nuclear ribonucleoproteins A2/B1	P22626;P22626-2	P22626;P22626-2			0.339451	0.184691	-0.179834	0.0930812	-0.393934	-0.0434564	0.572262	0.240716	-0.889453	11	11	11	36.5	36.5	36.5	37.429	0	118.07	5315200000	149
HNRNPA3	Heterogeneous nuclear ribonucleoprotein A3	P51991;P51991-2	P51991;P51991-2			0.199235	-0.00602086	0.340172	-0.145374	-0.465247	0.0772349	0.380965	0.276522	0.0421397	9	9	9	28.3	28.3	28.3	39.594	0	84.966	2721500000	85
HNRNPAB	Heterogeneous nuclear ribonucleoprotein A/B	Q99729-3;Q99729-2;Q99729-4;Q99729	Q99729-3;Q99729-2;Q99729-4;Q99729			0.117125	0.0252724	NaN	-0.280861	0.233065	-0.0946007	-0.31435	-0.0719357	NaN	5	5	5	23.2	23.2	23.2	30.588	0	87.643	1925500000	57
HNRNPC	Heterogeneous nuclear ribonucleoproteins C1/C2	P07910-2;P07910;P07910-4;P07910-3;P0DMR1;O60812;B7ZW38;B2RXH8	P07910-2;P07910;P07910-4;P07910-3			0.222886	0.114873	-0.0626822	-0.67788	0.359464	0.0433397	0.187337	-0.191781	0.464406	7	7	7	24.9	24.9	24.9	32.337	0	53.633	1079500000	35
HNRNPD	Heterogeneous nuclear ribonucleoprotein D0	Q14103-3;Q14103;Q14103-4;Q14103-2	Q14103-3;Q14103;Q14103-4;Q14103-2			0.270181	0.350053	0.30034	-1.01456	0.48497	-0.390984	0.412412	0.41218	0.484602	8	8	7	32.7	32.7	30.1	32.834	0	159.51	4767000000	117
HNRNPDL	Heterogeneous nuclear ribonucleoprotein D-like	O14979-3;O14979-2;O14979	O14979-3;O14979-2;O14979			0.0653706	-0.0109119	NaN	NaN	NaN	-0.0544586	0.193764	0.50345	NaN	4	3	3	20.5	17.2	17.2	27.191	0	22.352	457260000	22
HNRNPF	Heterogeneous nuclear ribonucleoprotein F;Heterogeneous nuclear ribonucleoprotein F, N-terminally processed	P52597	P52597			-0.2384	-0.137665	0.566079	-0.501641	0.444585	-0.132958	-0.0733477	0.329873	0.491401	9	7	7	25.5	19	19	45.671	0	84.066	3604300000	86
HNRNPH1	Heterogeneous nuclear ribonucleoprotein H;Heterogeneous nuclear ribonucleoprotein H, N-terminally processed	P31943;P55795	P31943			-0.0901874	0.12376	-0.539643	-0.0521262	0.373558	0.184639	0.304363	0.511114	-2.00186	9	9	7	26.1	26.1	20	49.229	0	152.89	5398400000	117
HNRNPK	Heterogeneous nuclear ribonucleoprotein K	P61978-3;P61978;P61978-2	P61978-3;P61978;P61978-2			0.153132	0.0980406	-0.176847	0.214726	-0.195285	-0.0937681	-0.0196218	0.208741	-0.485396	16	16	16	43.6	43.6	43.6	48.562	0	238.36	13231000000	334
HNRNPL	Heterogeneous nuclear ribonucleoprotein L	P14866;P14866-2	P14866;P14866-2			-0.118775	-0.322369	-0.0988181	0.533317	-0.00749811	0.0141427	-0.0906967	0.240497	-0.17248	9	9	9	24.4	24.4	24.4	64.132	0	112.19	2563100000	98
HNRNPM	Heterogeneous nuclear ribonucleoprotein M	P52272-2;P52272	P52272-2;P52272			0.0946	-0.309632	0.0365365	0.238727	0.146829	-0.207061	-0.117999	0.481492	0.773822	31	31	31	51.2	51.2	51.2	73.62	0	313.23	17305000000	449
HNRNPU	Heterogeneous nuclear ribonucleoprotein U	Q00839;Q00839-2	Q00839;Q00839-2			-0.127364	-0.0345313	-0.242703	0.171748	0.0696138	0.163236	-0.191655	-0.350363	-0.466206	24	24	24	27	27	27	90.583	0	323.31	14597000000	276
HNRNPUL1	Heterogeneous nuclear ribonucleoprotein U-like protein 1	Q9BUJ2-4;Q9BUJ2-2;Q9BUJ2;Q9BUJ2-3;Q9BUJ2-5	Q9BUJ2-4;Q9BUJ2-2;Q9BUJ2;Q9BUJ2-3			-0.115927	0.207115	NaN	0.0903416	0.244864	-0.426394	NaN	0.189852	NaN	5	5	5	7.8	7.8	7.8	84.793	0	33.467	954440000	19
HP1BP3	Heterochromatin protein 1-binding protein 3	Q5SSJ5-3;Q5SSJ5-2;Q5SSJ5	Q5SSJ5-3;Q5SSJ5-2;Q5SSJ5			0.0765858	-0.00119019	0.153311	0.280853	-0.293673	-0.215887	-0.00760269	0.229734	1.24104	3	3	3	7.5	7.5	7.5	44.434	0	19.002	253480000	13
HPRT1	Hypoxanthine-guanine phosphoribosyltransferase	P00492;Q9NRG1-2;Q9NRG1	P00492			0.345119	0.324281	-0.337059	-0.950066	0.410349	0.207376	0.209385	0.345964	0.168804	8	8	8	42.2	42.2	42.2	24.579	0	57.336	1988200000	66
HSD17B10	3-hydroxyacyl-CoA dehydrogenase type-2	Q99714;Q99714-2	Q99714;Q99714-2			0.349449	-0.0679588	-0.487602	-0.190926	0.224398	0.17264	0.233112	1.02434	-0.845121	11	11	11	61.7	61.7	61.7	26.923	0	189.02	5403800000	117
HSD17B4	Peroxisomal multifunctional enzyme type 2;(3R)-hydroxyacyl-CoA dehydrogenase;Enoyl-CoA hydratase 2	P51659;P51659-3;P51659-2	P51659;P51659-3;P51659-2			0.154618	-0.0345472	0.163081	0.107579	-0.357965	-0.0327657	0.0499083	0.285664	0.687121	12	12	12	19.8	19.8	19.8	79.685	0	112.45	2442500000	93
HSDL2	Hydroxysteroid dehydrogenase-like protein 2	Q6YN16-2;Q6YN16	Q6YN16-2;Q6YN16			NaN	0.30739	0.581203	NaN	-0.117716	-0.770876	0.543497	0.637353	1.03676	3	3	3	8.7	8.7	8.7	37.32	0	23.912	206990000	13
HSP90AA1	Heat shock protein HSP 90-alpha	P07900;P07900-2;Q14568;Q58FG0;Q58FG1	P07900;P07900-2			-0.223399	-0.066932	-0.0613206	0.390549	-0.0885347	0.0496375	-0.036569	0.00091807	-0.42666	39	23	23	53.4	35.1	35.1	84.659	0	323.31	51083000000	582
HSP90AB1	Heat shock protein HSP 90-beta	P08238;Q58FF7	P08238			-0.0806262	-0.0152003	-0.390299	0.236139	0.0554632	0.194524	0.109708	0.129941	-1.01315	41	41	20	54.8	54.8	30.1	83.263	0	323.31	165670000000	1258
HSP90B1	Endoplasmin	P14625;Q58FF3	P14625			0.103147	0.344972	-0.48947	0.146201	0.0825876	-0.187438	0.0886796	0.200866	-0.843371	38	36	36	48.2	46.5	46.5	92.468	0	323.31	51469000000	691
HSPA14	Heat shock 70 kDa protein 14	Q0VDF9	Q0VDF9			NaN	NaN	NaN	NaN	0.717317	-0.717317	NaN	NaN	NaN	2	2	2	3.9	3.9	3.9	54.794	0.00074516	14.257	31612000	4
HSPA1B;HSPA1A	Heat shock 70 kDa protein 1B;Heat shock 70 kDa protein 1A	P0DMV9;P0DMV8;P0DMV8-2	P0DMV9;P0DMV8;P0DMV8-2			0.0152038	0.37394	-0.369617	-0.309408	0.11563	0.174252	0.305886	0.140349	-0.591959	31	31	15	60.7	60.7	30.7	70.051	0	323.31	129600000000	1087
HSPA4	Heat shock 70 kDa protein 4	P34932;P34932-2	P34932			0.0797469	0.339728	-0.305496	-0.351112	0.380891	-0.143758	0.0819232	0.160203	0.39828	33	33	32	51.5	51.5	49.6	94.33	0	323.31	20548000000	541
HSPA4L	Heat shock 70 kDa protein 4L	O95757	O95757			NaN	-0.197836	NaN	0.0673175	0.285232	-0.154713	-0.0785298	-0.0860772	NaN	8	7	7	13.2	11.3	11.3	94.511	0	48.687	617320000	22
HSPA5	78 kDa glucose-regulated protein	P11021	P11021			-0.0166769	0.504552	-0.747998	-0.0348387	0.443854	-0.148892	0.337995	0.146779	-0.602681	32	32	31	49.8	49.8	49.8	72.332	0	323.31	65447000000	777
HSPA8	Heat shock cognate 71 kDa protein	P11142;P11142-2	P11142;P11142-2			0.0103858	0.355667	-0.692722	0.0839599	0.149342	0.0933669	0.405772	0.196106	-0.960731	30	26	19	58.4	54.2	43.2	70.897	0	323.31	61015000000	680
HSPA9	Stress-70 protein, mitochondrial	P38646	P38646			-0.135823	0.25313	-0.195196	-0.114689	0.254472	-0.0618938	-0.0769199	0.165308	0.284567	30	30	30	49.6	49.6	49.6	73.68	0	323.31	29418000000	594
HSPD1	60 kDa heat shock protein, mitochondrial	P10809;P10809-2	P10809			-0.0325022	-0.0865622	0.0218058	0.228066	-0.067132	-0.0636759	0.0639048	0.42858	-0.258946	27	27	27	58.6	58.6	58.6	61.054	0	323.31	34583000000	447
HSPH1	Heat shock protein 105 kDa	Q92598-2;Q92598;Q92598-3;Q92598-4	Q92598-2;Q92598;Q92598-3;Q92598-4			0.00615883	-0.426805	0.0274906	0.231499	0.410902	-0.249245	0.0245667	0.352354	0.131697	16	16	16	23.1	23.1	23.1	92.115	0	142.48	4768800000	128
HUWE1	E3 ubiquitin-protein ligase HUWE1	Q7Z6Z7-2;Q7Z6Z7-3;Q7Z6Z7	Q7Z6Z7-2;Q7Z6Z7-3;Q7Z6Z7			0.600963	-0.550242	0.504389	0.0311734	0.0945698	-0.680853	NaN	0.347189	NaN	11	11	11	3.3	3.3	3.3	480.19	0	70.645	670390000	18
HYOU1	Hypoxia up-regulated protein 1	Q9Y4L1;Q9Y4L1-2;Q9BXT5	Q9Y4L1;Q9Y4L1-2			0.557109	0.314773	-0.487077	0.302155	-0.204043	-0.482917	0.0673666	0.493455	0.190969	24	24	24	32	32	32	111.33	0	229.96	5828200000	186
IARS	Isoleucine--tRNA ligase, cytoplasmic	P41252	P41252			0.437964	0.212205	0.165988	-0.453681	-0.409503	0.0470282	0.153357	0.200928	-0.0494912	15	15	15	12.3	12.3	12.3	144.5	0	103.09	1784900000	69
IARS2	Isoleucine--tRNA ligase, mitochondrial	Q9NSE4	Q9NSE4			0.262886	-0.150986	NaN	-0.0413537	NaN	-0.0705457	-0.0531831	0.391706	NaN	7	7	7	6.9	6.9	6.9	113.79	0	46.222	964390000	19
IDE	Insulin-degrading enzyme	P14735;P14735-2	P14735			0.146657	-0.169547	NaN	-0.420558	0.104774	0.338674	0.457332	0.237498	0.0578434	8	8	8	8.6	8.6	8.6	117.97	0	49.463	727630000	14
IDH1	Isocitrate dehydrogenase [NADP] cytoplasmic	O75874	O75874			-0.0318982	0.247521	-0.116583	0.0741332	0.000543912	-0.173717	-0.0566079	0.0648559	-0.54075	13	13	12	33.6	33.6	31.4	46.659	0	110.02	3813400000	123
IDH3A	Isocitrate dehydrogenase [NAD] subunit alpha, mitochondrial	P50213;P50213-2	P50213;P50213-2			0.223878	-0.311865	NaN	0.274234	-0.151493	-0.0347542	0.231706	0.703159	NaN	7	7	7	23	23	23	39.591	0	60.512	1422000000	54
IDH3B	Isocitrate dehydrogenase [NAD] subunit beta, mitochondrial	O43837-2;O43837;O43837-3	O43837-2;O43837			0	NaN	NaN	NaN	NaN	NaN	NaN	NaN	NaN	3	3	3	8.6	8.6	8.6	41.887	0	17.483	468340000	10
IDI1	Isopentenyl-diphosphate Delta-isomerase 1	Q13907;Q13907-2;Q9BXS1	Q13907;Q13907-2			0.250911	-0.200585	NaN	-0.441266	0.416921	-0.0259808	-0.250195	NaN	NaN	4	4	4	19.4	19.4	19.4	26.319	0	35.951	479340000	32
IGF2BP1	Insulin-like growth factor 2 mRNA-binding protein 1	Q9NZI8;Q9NZI8-2	Q9NZI8;Q9NZI8-2			-0.174226	-0.0500898	0.269444	0.182044	0.000315666	-0.227489	-0.158175	0.0664835	0.495858	18	18	17	38.1	38.1	35.9	63.48	0	182.17	5600000000	214
IGF2BP3	Insulin-like growth factor 2 mRNA-binding protein 3	O00425;O00425-2	O00425;O00425-2			-0.123241	-0.150925	0.297752	0.263416	0.246252	-0.533255	-0.440256	-0.515566	0.585714	11	10	10	21.2	19	19	63.704	0	76.695	1473900000	68
ILF2	Interleukin enhancer-binding factor 2	Q12905	Q12905			0.199822	0.278243	NaN	-0.60885	0.150506	-0.0197212	-0.0571148	0.637322	NaN	10	10	10	40.8	40.8	40.8	43.062	0	93.742	2518000000	94
ILF3	Interleukin enhancer-binding factor 3	Q12906-5;Q12906-4;Q12906-2;Q12906-6;Q12906-3;Q12906;Q12906-7;Q96SI9-2;Q96SI9	Q12906-5;Q12906-4;Q12906-2;Q12906-6;Q12906-3;Q12906;Q12906-7			0.212754	0.209444	-0.589693	0.174242	-0.111084	0.104336	0.589003	0.212153	-1.73346	16	16	16	27.1	27.1	27.1	74.606	0	138.96	6541500000	203
ILKAP	Integrin-linked kinase-associated serine/threonine phosphatase 2C	Q9H0C8	Q9H0C8			0.209871	NaN	NaN	0.29807	-0.108464	-0.399477	NaN	NaN	0.254549	5	5	5	12	12	12	42.906	0	33.642	406810000	24
IMMT	MICOS complex subunit MIC60	Q16891-4;Q16891-2;Q16891;Q16891-3	Q16891-4;Q16891-2;Q16891;Q16891-3			0.200022	-0.106599	0.0999645	0.399973	-0.236612	-0.356748	0.083937	0.39246	0.447666	21	21	21	31.3	31.3	31.3	83.548	0	198.49	5358300000	192
IMPDH2	Inosine-5-monophosphate dehydrogenase 2	P12268	P12268			0.12097	-0.336805	-0.226011	0.223013	-0.0415436	0.260376	-0.310548	-0.393312	0.26063	13	13	12	32.7	32.7	31.1	55.804	0	118.06	4014500000	125
IPO11	Importin-11	Q9UI26;Q9UI26-2	Q9UI26;Q9UI26-2			0.192243	0.107867	NaN	NaN	-0.0985155	-0.201594	0.210965	0.529424	NaN	3	3	3	4	4	4	112.53	0	17.948	253340000	7
IPO4	Importin-4	Q8TEX9;Q8TEX9-2	Q8TEX9;Q8TEX9-2			NaN	0.295178	NaN	-0.399614	0.147282	-0.0428462	-0.267662	NaN	NaN	9	9	9	11.5	11.5	11.5	118.71	0	70.548	1541400000	42
IPO5	Importin-5	O00410;O00410-3;O00410-2;O60518	O00410;O00410-3;O00410-2			0.166602	-0.205172	0.210924	-0.212361	0.216289	-0.176282	-0.30963	-0.165141	-0.516972	21	21	21	24.9	24.9	24.9	123.63	0	275.03	6957000000	180
IPO7	Importin-7	O95373	O95373			0.331603	-0.7147	NaN	0.522136	-0.00541763	-0.133622	0.199342	0.310617	-0.633361	11	11	11	14.4	14.4	14.4	119.52	0	106.47	2510200000	49
IPO9	Importin-9	Q96P70	Q96P70			0.585985	0.128143	NaN	-0.838905	0.129961	-0.00518417	0.203522	0.0423908	0.0173912	9	9	9	11	11	11	115.96	0	71.699	1051300000	32
IQGAP1	Ras GTPase-activating-like protein IQGAP1	P46940;Q13576-3;Q13576-2;Q13576;Q86VI3	P46940			0.284933	0.0583798	0.194345	-0.235155	-0.377598	0.0750958	0.112306	0.190515	0.566345	37	37	37	28.5	28.5	28.5	189.25	0	323.31	10239000000	355
IRGQ	Immunity-related GTPase family Q protein	Q8WZA9	Q8WZA9			NaN	-0.0389046	0.285431	0.135215	-0.133343	-0.248398	0.272905	0.528726	0.427085	7	7	7	15.7	15.7	15.7	62.717	0	55.148	1096400000	41
IRS4	Insulin receptor substrate 4	O14654	O14654			0.203161	-0.185395	0.300918	0.277986	-0.296421	-0.300249	0.130653	0.362159	0.600044	20	20	20	22.9	22.9	22.9	133.77	0	210.96	5740300000	125
ISYNA1	Inositol-3-phosphate synthase 1	Q9NPH2-3;Q9NPH2;Q9NPH2-2	Q9NPH2-3;Q9NPH2;Q9NPH2-2			-0.028326	0.238625	0.434225	-0.238302	-0.477068	0.0708466	-0.184856	-0.212103	0.0463772	7	7	7	18.8	18.8	18.8	55.135	0	61.589	2015600000	56
IVD	Isovaleryl-CoA dehydrogenase, mitochondrial	P26440-2;P26440	P26440-2;P26440			0.152047	NaN	NaN	0.157906	NaN	-0.309953	0.158133	0.292775	NaN	2	2	2	5.6	5.6	5.6	43.055	0.00072727	13.405	266020000	13
JUP	Junction plakoglobin	P14923	P14923			0.424228	0.936803	-0.308797	-0.474942	-0.497518	-0.0797739	-0.711667	0.427592	-0.0707006	11	11	11	15.3	15.3	15.3	81.744	0	85.993	1256800000	50
KARS	Lysine--tRNA ligase	Q15046;Q15046-2	Q15046;Q15046-2			0.0998428	-0.0419189	NaN	0.113299	-0.333314	0.162091	0.348025	0.408103	0.556088	9	9	9	19.9	19.9	19.9	68.047	0	73.338	1966000000	59
KHDRBS1	KH domain-containing, RNA-binding, signal transduction-associated protein 1	Q07666-2;Q07666;Q07666-3;O75525-2;O75525;Q5VWX1	Q07666-2;Q07666;Q07666-3			-0.149853	-0.380871	-0.0873801	0.647521	-0.174473	0.145057	0.218574	0.0609754	0.161165	5	5	5	16	16	16	45.86	0	41.785	2187000000	48
KHSRP	Far upstream element-binding protein 2	Q92945	Q92945			0.156551	0.126524	-0.0252419	0.348627	-0.347828	-0.258633	0.263716	0.482302	-0.35251	24	24	23	52.5	52.5	50.5	73.114	0	323.31	18560000000	339
KIAA1279	KIF1-binding protein	Q96EK5	Q96EK5			0.214995	0.121992	-0.0217511	0.097298	-0.153259	-0.259275	0.150261	0.120041	0.464276	4	4	4	7.9	7.9	7.9	71.813	0	22.836	521250000	11
KIAA1598	Shootin-1	A0MZ66-2;A0MZ66-8;A0MZ66-4;A0MZ66-5;A0MZ66-6;A0MZ66;A0MZ66-3	A0MZ66-2;A0MZ66-8;A0MZ66-4;A0MZ66-5;A0MZ66-6;A0MZ66;A0MZ66-3			0.0695362	NaN	NaN	NaN	NaN	-0.0695362	-0.0346012	0.153765	0.2362	3	3	3	7.5	7.5	7.5	52.635	0	19.536	296590000	7
KIF1B	Kinesin-like protein KIF1B	O60333-2;O60333;O60333-4	O60333-2;O60333;O60333-4			-3.16728	-1.4328	NaN	1.28575	2.07121	1.24312	NaN	NaN	NaN	3	3	2	1.6	1.6	0.8	199.26	0	18.407	603020000000	50
KIF2A	Kinesin-like protein KIF2A	O00139-2;O00139-1;O00139-5;O00139;O00139-4;Q99661-2;Q99661	O00139-2;O00139-1;O00139-5;O00139;O00139-4			0.239353	-0.239353	NaN	NaN	NaN	NaN	-0.0560265	0.236618	0.980436	3	3	3	5.8	5.8	5.8	75.042	0	24.529	162500000	11
KIF5B	Kinesin-1 heavy chain	P33176;Q12840;O60282;O60282-2	P33176			0.507051	9.28243e-05	0.573259	0.0321954	-0.727738	-0.38486	0.236478	0.110202	0.382999	16	16	16	20.2	20.2	20.2	109.68	0	159.8	2352000000	71
KLC1	Kinesin light chain 1	Q07866-8;Q07866-2;Q07866-3;Q07866;Q07866-7;Q07866-5;Q07866-10;Q07866-6;Q07866-4;Q07866-9	Q07866-8;Q07866-2;Q07866-3;Q07866;Q07866-7;Q07866-5;Q07866-10;Q07866-6;Q07866-4;Q07866-9			-0.159257	0.189166	0.101001	NaN	0.0999271	-0.230838	0.0372955	0.169906	0.0923454	7	7	4	13.6	13.6	7.4	62.825	0	47.42	841730000	25
KLC4	Kinesin light chain 4	Q9NSK0;Q9NSK0-3;Q9NSK0-4;Q9NSK0-5	Q9NSK0;Q9NSK0-3;Q9NSK0-4;Q9NSK0-5			0.192902	-0.301203	0.0994415	0.426332	NaN	-0.417473	0.134998	0.541882	NaN	5	4	4	10	8.4	8.4	68.639	0	29.37	405050000	10
KPNA2	Importin subunit alpha-1	P52292	P52292			0.339023	-0.355456	0.201531	0.0393591	-0.200349	-0.0241079	0.0527811	0.370265	0.101987	13	13	13	30.1	30.1	30.1	57.861	0	142.57	2900800000	108
KPNA3	Importin subunit alpha-4	O00505	O00505			NaN	NaN	NaN	0.318252	-0.318252	NaN	-0.378257	NaN	NaN	4	4	4	8.8	8.8	8.8	57.81	0	32.229	341870000	11
KPNB1	Importin subunit beta-1	Q14974;Q14974-2	Q14974;Q14974-2			0.0150963	-0.213799	0.0185563	0.181318	0.234144	-0.235316	-0.0717185	-0.0553859	0.0578801	28	28	28	38.8	38.8	38.8	97.169	0	323.31	33304000000	555
KRT2	Keratin, type II cytoskeletal 2 epidermal	P35908	P35908			0.429826	1.04769	-0.407748	-0.523073	-0.285399	-0.261301	-0.606444	-0.0661128	-0.985771	43	40	1	77.2	74	4.7	65.432	0	323.31	69934000000	792
KTN1	Kinectin	Q86UP2-2;Q86UP2-4;Q86UP2;Q86UP2-3	Q86UP2-2;Q86UP2-4;Q86UP2;Q86UP2-3			0.297659	-0.656196	0.0972446	0.673937	0.0842307	-0.496875	0.0144447	0.264052	0.942499	17	17	17	14.8	14.8	14.8	149.61	0	140.66	2320000000	64
LANCL1	LanC-like protein 1	O43813	O43813			0.137387	NaN	NaN	0.218051	-0.479514	0.124076	0.777701	0.221356	-0.139298	5	5	5	13	13	13	45.283	0	33.272	769530000	17
LAP3	Cytosol aminopeptidase	P28838-2;P28838	P28838-2;P28838			NaN	0	NaN	NaN	NaN	NaN	0.102795	NaN	NaN	5	5	5	11.3	11.3	11.3	52.771	0	37.99	322560000	14
LARS	Leucine--tRNA ligase, cytoplasmic	Q9P2J5;Q9P2J5-2;Q9P2J5-3	Q9P2J5;Q9P2J5-2			-0.083855	-0.638148	0.739919	0.0717713	0.0660473	-0.155735	-0.174206	-0.0816921	0.489509	18	18	18	18.6	18.6	18.6	134.46	0	161.41	3164900000	81
LASP1	LIM and SH3 domain protein 1	Q14847;Q14847-2;Q14847-3	Q14847;Q14847-2;Q14847-3			NaN	0.224488	-0.143375	-0.0625607	0.529097	-0.547649	-0.0389038	0.3405	0.741219	4	4	4	15.7	15.7	15.7	29.717	0	28.745	479790000	29
LBR	Lamin-B receptor	Q14739	Q14739			0.654635	0.102599	-0.105865	-0.101775	-0.3959	-0.153694	0.273764	0.261141	-0.174629	6	6	6	10.7	10.7	10.7	70.702	0	43.425	1959700000	88
LCP1	Plastin-2	P13796;P13796-2	P13796			0.449204	0.392577	-0.0834932	-0.372632	-0.209363	-0.176293	-0.0220327	0.321101	-0.815108	19	14	14	35.6	27.1	27.1	70.288	0	109.56	2754600000	98
LDHA	L-lactate dehydrogenase A chain	P00338;P00338-3;P00338-4;P00338-5;P00338-2	P00338;P00338-3;P00338-4;P00338-5;P00338-2			-0.404342	-0.332935	0.555718	-0.164919	0.333073	0.0134052	0.201477	0.0201305	0.299691	16	15	15	45.2	41.6	41.6	36.688	0	240.42	30217000000	323
LDHB	L-lactate dehydrogenase B chain	P07195;Q6ZMR3;P07864	P07195			0.164749	-0.106836	0.0500641	0.232893	-0.0324764	-0.308393	0.313213	0.414927	-0.24371	18	18	17	48.8	48.8	45.2	36.638	0	295.13	58699000000	531
LIG3	DNA ligase 3	P49916-3;P49916;P49916-4;P49916-2	P49916-3;P49916;P49916-4;P49916-2			NaN	NaN	NaN	0.0460129	0.354679	-0.400692	NaN	0.22051	0.0749073	7	7	7	8.2	8.2	8.2	102.69	0	47.066	415240000	7
LMAN1	Protein ERGIC-53	P49257	P49257			0.621222	-0.16036	NaN	0.0676674	-0.155624	-0.372905	0.0556034	0.414555	NaN	3	3	3	5.3	5.3	5.3	57.548	0	21.664	502210000	29
LONP1	Lon protease homolog, mitochondrial	P36776-3;P36776-2;P36776	P36776-3;P36776-2;P36776			NaN	0.123424	NaN	-1.20202	0.976233	0.102365	-0.454947	NaN	NaN	5	5	5	8.1	8.1	8.1	85.64	0	36.381	278160000	20
LRPPRC	Leucine-rich PPR motif-containing protein, mitochondrial	P42704;Q9NP80-3;Q9NP80-2;Q9NP80	P42704			0.20982	-0.0365486	0.121304	0.233688	-0.241713	-0.286551	0.0687447	0.0906696	0.0859776	42	42	42	31.9	31.9	31.9	157.9	0	323.31	13064000000	423
LRRC47	Leucine-rich repeat-containing protein 47	Q8N1G4	Q8N1G4			-0.0302647	-0.135064	NaN	0.405753	0.101907	-0.342332	0.0367424	0.196601	NaN	10	10	10	21.3	21.3	21.3	63.472	0	75.902	1551300000	66
LRRC59	Leucine-rich repeat-containing protein 59	Q96AG4	Q96AG4			NaN	0.346201	NaN	-1.29114	0.820397	0.124543	-0.214048	-1.07134	NaN	7	7	7	27.7	27.7	27.7	34.93	0	57.03	2405200000	59
LRRFIP1	Leucine-rich repeat flightless-interacting protein 1	Q32MZ4-3;Q32MZ4-2;Q32MZ4	Q32MZ4-3;Q32MZ4-2;Q32MZ4			0	NaN	NaN	NaN	NaN	NaN	NaN	0.478888	0.650463	3	3	3	5.1	5.1	5.1	82.688	0	35.77	132490000	8
LTA4H	Leukotriene A-4 hydrolase	P09960;P09960-4;P09960-2;P09960-3	P09960;P09960-4;P09960-2;P09960-3			0.0448351	0.597735	0.357453	-1.11587	-0.0238638	0.13971	0.363494	0.452546	1.27743	16	16	16	30.8	30.8	30.8	69.284	0	188.43	3343800000	124
LUC7L	Putative RNA-binding protein Luc7-like 1	Q9NQ29-2;Q9NQ29;Q9NQ29-3	Q9NQ29-2;Q9NQ29;Q9NQ29-3			NaN	0	NaN	NaN	NaN	NaN	-0.332235	NaN	NaN	6	2	2	19.4	8	8	38.405	0	26.685	212380000	11
LUC7L2	Putative RNA-binding protein Luc7-like 2	Q9Y383;Q96HJ9-2;Q9Y383-3;Q9Y383-2	Q9Y383;Q96HJ9-2;Q9Y383-3;Q9Y383-2			-0.0124772	-0.259345	0.329781	0.222924	-0.107105	-0.173778	0.0686156	0.557559	0.0248343	8	8	4	21.7	21.7	12.2	46.513	0	189.56	3789300000	149
LUC7L3	Luc7-like protein 3	O95232;O95232-2	O95232			0.0869974	-0.283738	0.350673	0.247127	-0.118409	-0.282651	-0.0961558	0.842084	-0.640753	8	8	8	20.1	20.1	20.1	51.466	0	106.29	1627500000	67
MAGED2	Melanoma-associated antigen D2	Q9UNF1-2;Q9UNF1;Q12816-5;Q12816-2;Q9Y5V3;Q9Y5V3-2	Q9UNF1-2;Q9UNF1			0.340029	0.0189231	0.507511	0.0592235	-0.563234	-0.362453	0.142262	0.411976	0.766363	10	10	9	27.7	27.7	26.4	63.167	0	121.17	1879200000	57
MAGOHB;MAGOH	Protein mago nashi homolog 2;Protein mago nashi homolog	Q96A72;P61326;P61326-2	Q96A72;P61326			NaN	0.280024	NaN	-0.280024	NaN	NaN	0.389172	0.562571	NaN	3	3	3	27	27	27	17.276	0	26.972	334700000	15
MAP4	Microtubule-associated protein 4	P27816-6;P27816;P27816-2;P27816-5;P27816-4	P27816-6;P27816;P27816-2;P27816-5;P27816-4			0.306475	-0.274992	0.08297	0.17326	0.034756	-0.322469	-0.180824	0.693707	0.698057	9	9	9	10.1	10.1	10.1	119.96	0	63.831	827580000	23
MAPK1	Mitogen-activated protein kinase 1	P28482;P28482-2	P28482;P28482-2			0.521977	-0.434274	0.532323	-0.211204	-0.301702	-0.10712	0.270371	0.557664	0.711722	6	6	4	20.6	20.6	13.9	41.389	0	41.374	1050300000	51
MAPRE1	Microtubule-associated protein RP/EB family member 1	Q15691;Q9UPY8-2;Q9UPY8	Q15691			0.22465	0.435075	-0.562329	0.336505	0.0177736	-0.451674	0.298617	0.194077	-0.894282	13	13	13	59.7	59.7	59.7	29.999	0	143.8	12063000000	217
MARCKS	Myristoylated alanine-rich C-kinase substrate	P29966	P29966			-0.04094	-0.336093	0.22677	0.247182	0.29788	-0.394799	-0.654868	0.425716	0.354068	6	6	6	34.9	34.9	34.9	31.554	0	101.6	1508200000	106
MARS	Methionine--tRNA ligase, cytoplasmic	P56192;P56192-2	P56192			0.481598	-0.0581818	-0.249407	0.1742	0.108421	-0.456631	-0.0469933	0.106804	NaN	5	5	5	6.4	6.4	6.4	101.11	0	44.664	1057300000	50
MAT2A	S-adenosylmethionine synthase isoform type-2	P31153;P31153-2;Q00266	P31153;P31153-2			NaN	0.343488	NaN	-0.224511	-0.366744	0.247766	0.0109572	-0.100781	NaN	7	7	7	20.5	20.5	20.5	43.66	0	48.398	2056600000	58
MATR3	Matrin-3	P43243	P43243			0.505869	-0.045984	0.615488	0.0960468	-0.273187	-0.898233	0.805092	0.0782741	1.04237	13	13	8	15.9	15.9	9.1	94.622	0	109.43	1182900000	65
MAVS	Mitochondrial antiviral-signaling protein	Q7Z434-4;Q7Z434	Q7Z434-4;Q7Z434			0.34605	-0.567351	0.02819	0.319661	-0.0409304	-0.0856196	0.351693	1.16622	NaN	6	6	6	20.1	20.1	20.1	40.467	0	53.067	1364500000	36
MCCC1	Methylcrotonoyl-CoA carboxylase subunit alpha, mitochondrial	Q96RQ3	Q96RQ3			0.0446202	0.141138	-0.645174	0.138309	-0.178042	0.499149	-0.135485	-0.519829	-2.17379	28	28	28	48.8	48.8	48.8	80.472	0	323.31	35985000000	528
MCM2	DNA replication licensing factor MCM2	P49736	P49736			0.204464	0.263157	NaN	-0.103422	-0.348726	-0.0154739	0.272593	0.0569939	NaN	8	8	8	12.2	12.2	12.2	101.89	0	83.346	1292800000	29
MCM3	DNA replication licensing factor MCM3	P25205;P25205-2	P25205;P25205-2			0.252425	-0.265254	-0.0290292	-0.0760549	0.306389	-0.188476	0.185229	0.109559	0.290373	20	20	20	27.6	27.6	27.6	90.98	0	173.71	3931000000	159
MCM4	DNA replication licensing factor MCM4	P33991;Q9UJA3-2;Q9UJA3-3;Q9UJA3;Q9UJA3-4	P33991			0.229988	-0.126218	-0.435053	0.389262	0.0226119	-0.0805909	0.140492	0.482069	0.235506	10	10	10	10.4	10.4	10.4	96.557	0	68.404	1453100000	40
MCM5	DNA replication licensing factor MCM5	P33992	P33992			0.225202	0.145028	0.00214481	0.0404978	-0.357223	-0.0556498	0.375043	0.237796	NaN	7	7	7	12.4	12.4	12.4	82.285	0	64.737	1358700000	51
MCM6	DNA replication licensing factor MCM6	Q14566	Q14566			0.465386	0.0437187	-0.378294	0.440996	-0.390119	-0.181688	0.242182	0.260046	-0.9137	15	15	15	20.8	20.8	20.8	92.888	0	148.16	3402600000	126
MCM7	DNA replication licensing factor MCM7	P33993;P33993-3;P33993-2	P33993;P33993-3;P33993-2			0.184626	0.0985762	0.123767	-0.151035	-0.127929	-0.128005	0.287186	0.116107	0.262206	14	14	14	26.8	26.8	26.8	81.307	0	141.36	1914600000	72
MCMBP	Mini-chromosome maintenance complex-binding protein	Q9BTE3-2;Q9BTE3;Q9BTE3-3	Q9BTE3-2;Q9BTE3			0.0677808	NaN	NaN	0.0231355	NaN	-0.0909163	-0.0906779	0.0546716	NaN	3	3	3	4.8	4.8	4.8	72.748	0	22.918	359200000	16
MDH1	Malate dehydrogenase, cytoplasmic	P40925;P40925-3;P40925-2	P40925;P40925-3;P40925-2			-0.0756022	0.283264	-0.842654	0.154132	0.232532	0.248329	0.33331	0.248155	-0.80391	11	11	11	40.4	40.4	40.4	36.426	0	104.96	8538000000	147
MDH2	Malate dehydrogenase, mitochondrial	P40926;P40926-2	P40926;P40926-2			0.15998	-0.0767008	0.0549024	-0.425982	0.276786	0.0110143	-0.248564	-0.240903	-0.310883	13	13	13	51.8	51.8	51.8	35.503	0	294.65	14208000000	235
ME1	NADP-dependent malic enzyme	P48163;P48163-2	P48163;P48163-2			NaN	-0.243426	0.449683	-0.572671	0.366414	NaN	-0.531343	0.616946	0.415147	7	7	7	13.5	13.5	13.5	64.149	0	48.601	541180000	19
ME2	NAD-dependent malic enzyme, mitochondrial	P23368;P23368-2;Q16798-2;Q16798	P23368;P23368-2			0.363854	0.0840629	0.176867	-0.295744	-0.090984	-0.238056	0.198101	0.146988	NaN	11	11	11	19	19	19	65.443	0	111.97	1744500000	47
METAP2	Methionine aminopeptidase 2	P50579-3;P50579;P50579-2	P50579-3;P50579			-0.0362766	-0.46946	NaN	0.313882	0.0227749	0.16908	0.10307	-0.181264	NaN	4	4	4	13.2	13.2	13.2	50.496	0	41.767	567790000	14
MIF	Macrophage migration inhibitory factor	P14174	P14174			-0.135382	0.0846474	NaN	-0.305419	0.119878	0.236276	0.318576	0.18152	NaN	2	2	2	27.8	27.8	27.8	12.476	0	20.746	2711300000	71
MMTAG2	Multiple myeloma tumor-associated protein 2	Q9BU76-4;Q9BU76;Q9BU76-3;Q9BU76-2	Q9BU76-4;Q9BU76;Q9BU76-3			0.154573	-0.0625465	NaN	0.0212452	-0.0662697	-0.0470016	-0.235875	-0.173127	NaN	3	3	3	21.7	21.7	21.7	20.536	0	33.357	516960000	26
MPC2	Mitochondrial pyruvate carrier 2	O95563	O95563			NaN	0.316635	NaN	-0.727039	0.0146275	0.395777	-0.319	NaN	NaN	3	3	3	23.6	23.6	23.6	14.279	0	19.545	304290000	15
MPI	Mannose-6-phosphate isomerase	P34949-2;P34949	P34949-2;P34949			-0.155965	NaN	NaN	0.330767	-0.19318	0.0183778	0.380646	0.1864	NaN	2	2	2	7.5	7.5	7.5	39.834	0.00075301	14.588	310600000	11
MPST	3-mercaptopyruvate sulfurtransferase	P25325;P25325-2	P25325;P25325-2			0.210457	NaN	NaN	NaN	-0.0155144	-0.194942	-0.150869	0.440533	NaN	6	6	6	26.6	26.6	26.6	33.178	0	35.538	484190000	12
MRPL35	39S ribosomal protein L35, mitochondrial	Q9NZE8;Q9NZE8-2	Q9NZE8;Q9NZE8-2			0.233673	0.305286	NaN	-0.0829185	-0.468932	0.0128914	-0.0138878	-0.194689	NaN	2	2	2	9	9	9	21.514	0.00074963	14.38	1141100000	22
MRPS27	28S ribosomal protein S27, mitochondrial	Q92552;Q92552-2	Q92552;Q92552-2			-0.087238	-0.0253102	-0.152876	0.0539478	0.310673	-0.0991971	-0.366172	-0.155843	-0.178749	7	7	7	19.3	19.3	19.3	47.611	0	43.374	703900000	30
MRPS34	28S ribosomal protein S34, mitochondrial	P82930	P82930			0.269985	0.330538	NaN	-0.50675	0.109142	-0.202915	-0.446339	NaN	NaN	3	3	3	10.1	10.1	10.1	25.65	0	17.163	248410000	14
MSH2	DNA mismatch repair protein Msh2	P43246;P43246-2	P43246;P43246-2			0.430683	-0.0880829	0.0934432	0.544487	-0.772602	-0.207929	-0.0649315	0.114945	0.403233	14	14	14	16.6	16.6	16.6	104.74	0	92.444	2125400000	72
MSH6	DNA mismatch repair protein Msh6	P52701-4;P52701-3;P52701;P52701-2	P52701-4;P52701-3;P52701;P52701-2			0.563845	-0.212933	0.345331	-0.0518684	-0.648632	0.0042572	0.0521564	0.214481	NaN	14	14	14	16.1	16.1	16.1	119.79	0	99.333	1309000000	30
MSN	Moesin	P26038	P26038			-0.0452366	0.274721	-0.164127	0.249254	0.223978	-0.538589	0.346611	0.3671	0.849701	21	21	14	36.6	36.6	25.6	67.819	0	148.08	5597600000	166
MTCH2	Mitochondrial carrier homolog 2	Q9Y6C9	Q9Y6C9			-0.32808	-0.0975632	NaN	0.0280548	0.110113	0.287475	0.527689	0.532022	NaN	5	5	5	22.8	22.8	22.8	33.331	0	57.808	1943300000	42
MT-CO2	Cytochrome c oxidase subunit 2	P00403	P00403			-0.576591	-0.984459	NaN	0.594294	0.94763	0.0191269	0.092205	-0.496775	NaN	7	7	7	35.2	35.2	35.2	25.565	0	59.139	3127300000	58
MTHFD1	C-1-tetrahydrofolate synthase, cytoplasmic;Methylenetetrahydrofolate dehydrogenase;Methenyltetrahydrofolate cyclohydrolase;Formyltetrahydrofolate synthetase;C-1-tetrahydrofolate synthase, cytoplasmic, N-terminally processed	P11586	P11586			0.269889	0.0728499	-0.0249608	0.184363	-0.246091	-0.256049	0.296891	0.667485	0.511786	31	31	31	35.8	35.8	35.8	101.56	0	284.68	9385900000	289
MTHFD1L	Monofunctional C1-tetrahydrofolate synthase, mitochondrial	Q6UB35;Q6UB35-2	Q6UB35			0.689951	0.167223	NaN	-0.532511	-0.174715	-0.149948	0.18951	0.799053	0.692839	12	12	12	13.9	13.9	13.9	105.79	0	79.569	1222500000	41
MUT	Methylmalonyl-CoA mutase, mitochondrial	P22033	P22033			0.12011	0.133572	NaN	NaN	-0.396414	0.142733	NaN	0.263727	NaN	3	3	3	4.1	4.1	4.1	83.134	0	25.217	285070000	12
MYBBP1A	Myb-binding protein 1A	Q9BQG0;Q9BQG0-2	Q9BQG0;Q9BQG0-2			0.168171	-0.160446	0.0031697	0.501545	-0.123356	-0.389082	0.137699	0.230259	-0.887638	16	16	16	13.7	13.7	13.7	148.85	0	104.86	1758600000	54
MYH10	Myosin-10	P35580;P35580-5;P35580-2;P35580-3;P35580-4	P35580;P35580-5;P35580-2;P35580-3;P35580-4			NaN	NaN	NaN	-0.322049	0.601817	-0.279769	NaN	NaN	NaN	10	6	6	5.5	3.5	3.5	229	0	36.242	326890000	4
MYH9	Myosin-9	P35579;P35579-2;P35749-4;P35749-3;P35749;P35749-2	P35579;P35579-2			0.157495	-0.316874	0.182699	0.0635907	-0.37006	0.283149	-0.400776	-0.439123	0.0155179	43	43	37	26.3	26.3	22.9	226.53	0	323.31	8505300000	341
MYL1;MYL3	Myosin light chain 1/3, skeletal muscle isoform;Myosin light chain 3	P05976-2;P05976;P08590	P05976-2;P05976;P08590			-0.556763	-0.181395	NaN	0.881088	NaN	-0.14293	-0.299609	0.0415187	NaN	2	2	2	10.7	10.7	10.7	16.684	0.00078493	16.313	780970000	35
MYL12A;MYL12B;MYL9	Myosin regulatory light chain 12A;Myosin regulatory light chain 12B;Myosin regulatory light polypeptide 9	P19105;O14950;P24844;P24844-2	P19105;O14950;P24844			-0.0065155	0.656139	-0.494902	-0.120186	-0.0732384	0.038702	0.281034	0.224762	-1.74589	7	7	7	50.9	50.9	50.9	19.794	0	250.16	5545900000	129
MYL6	Myosin light polypeptide 6	P60660-2;P60660;P14649	P60660-2;P60660			-0.255562	0.263315	-0.410044	0.254285	0.0240053	0.124002	0.311071	0.22912	-1.87522	8	8	8	55.6	55.6	55.6	16.961	0	117.84	5058200000	113
MYO6	Unconventional myosin-VI	Q9UM54-5;Q9UM54-2;Q9UM54-6;Q9UM54-4;Q9UM54-1;Q9UM54	Q9UM54-5;Q9UM54-2;Q9UM54-6;Q9UM54-4;Q9UM54-1;Q9UM54			0.173301	-0.540339	-0.00708675	0.414464	0.0267	-0.0670385	0.265452	0.270656	NaN	11	11	11	10.5	10.5	10.5	145.04	0	78.724	1339800000	43
NAA10	N-alpha-acetyltransferase 10	P41227-2;P41227;Q9BSU3	P41227-2;P41227			-0.594769	0.193908	0.19162	0.359024	-0.247607	0.0978238	0.239061	0.411077	0.258789	5	5	5	27.7	27.7	27.7	24.783	0	31.172	606990000	15
NAA15	N-alpha-acetyltransferase 15, NatA auxiliary subunit	Q9BXJ9;Q9BXJ9-4;Q6N069-5;Q6N069-4;Q6N069-3;Q6N069-2;Q6N069	Q9BXJ9;Q9BXJ9-4			0.455105	0.110754	0.00755501	-0.0675964	-0.317507	-0.188311	0.3011	0.101265	-0.0685139	10	10	10	13	13	13	101.27	0	66.31	1140400000	49
NAMPT	Nicotinamide phosphoribosyltransferase	P43490	P43490			0.133754	0.206439	NaN	-0.753461	0.230151	0.183116	0.295661	-0.496075	NaN	10	10	10	26.9	26.9	26.9	55.52	0	70.633	1266100000	25
NAP1L1	Nucleosome assembly protein 1-like 1	P55209-2;P55209;P55209-3	P55209-2;P55209;P55209-3			NaN	0.374722	NaN	-1.02046	0.223853	0.421887	NaN	NaN	NaN	4	3	3	10.9	8.2	8.2	42.761	0	50.474	1282100000	35
NAP1L4	Nucleosome assembly protein 1-like 4	Q99733;Q99733-2	Q99733;Q99733-2			0.20951	0.12055	-0.337893	0.776861	-0.698216	-0.0708125	0.256275	0.262199	0.583778	5	5	4	16.8	16.8	14.1	42.823	0	81.095	2676400000	51
NARS	Asparagine--tRNA ligase, cytoplasmic	O43776;O43776-2	O43776			-0.0373589	0.431652	NaN	-0.716043	0.1549	0.16685	-0.116439	-0.353786	NaN	12	12	12	27.4	27.4	27.4	62.942	0	107.31	3243800000	110
NASP	Nuclear autoantigenic sperm protein	P49321;P49321-3;P49321-4;P49321-2	P49321;P49321-3;P49321-4			0.158289	0.042894	-0.0629009	0.443977	-0.288891	-0.293368	-0.0571807	0.224443	-0.285073	21	21	21	35.5	35.5	35.5	85.237	0	248.89	10512000000	267
NCBP1	Nuclear cap-binding protein subunit 1	Q09161	Q09161			NaN	0	NaN	NaN	NaN	NaN	0.0388985	NaN	NaN	4	4	4	5.4	5.4	5.4	91.838	0	26.131	506920000	15
NCKAP1	Nck-associated protein 1	Q9Y2A7;Q9Y2A7-2	Q9Y2A7;Q9Y2A7-2			NaN	NaN	NaN	0.277671	-0.0827986	-0.194873	-1.17788	NaN	NaN	4	4	4	3.2	3.2	3.2	128.79	0	23.695	272330000	14
NCL	Nucleolin	P19338	P19338			0.125381	0.294291	0.0782709	-0.138711	-0.242169	-0.117063	-0.0550108	-0.0532541	-0.543612	20	20	20	29.2	29.2	29.2	76.613	0	258.87	15513000000	310
NDC1	Nucleoporin NDC1	Q9BTX1-6;Q9BTX1-5;Q9BTX1-2;Q9BTX1;Q9BTX1-4;Q9BTX1-3	Q9BTX1-6;Q9BTX1-5;Q9BTX1-2;Q9BTX1;Q9BTX1-4			0.721571	NaN	NaN	NaN	-0.721571	NaN	4.92935	4.64945	1.90156	13	13	13	26.8	26.8	26.8	63.157	0	153.58	3058000000	71
NDC80	Kinetochore protein NDC80 homolog	O14777	O14777			NaN	0.775381	NaN	NaN	0.225315	-1.0007	NaN	-0.231873	-0.507135	5	5	5	7.2	7.2	7.2	73.912	0	30.904	2493200000	21
NDUFA4	Cytochrome c oxidase subunit NDUFA4	O00483	O00483			-0.239569	-0.219872	NaN	0.39375	0.143306	-0.0776146	-0.0910137	0.359632	NaN	4	4	4	46.9	46.9	46.9	9.3697	0	27.587	2275600000	57
NDUFA5	NADH dehydrogenase [ubiquinone] 1 alpha subcomplex subunit 5	Q16718-2;Q16718	Q16718-2;Q16718			NaN	-0.239896	NaN	-0.720811	1.0371	-0.0763979	-0.528762	NaN	NaN	2	2	2	16.4	16.4	16.4	13.563	0.00076394	15.016	356570000	27
NDUFS1	NADH-ubiquinone oxidoreductase 75 kDa subunit, mitochondrial	P28331-3;P28331-4;P28331-5;P28331;P28331-2	P28331-3;P28331-4;P28331-5;P28331;P28331-2			0.52502	0.128737	0.000552177	-0.888843	0.469916	-0.235383	0.256698	0.614831	0.892323	10	10	10	22.4	22.4	22.4	67.524	0	102.69	1441100000	45
NDUFV1	NADH dehydrogenase [ubiquinone] flavoprotein 1, mitochondrial	P49821-2;P49821	P49821-2;P49821			NaN	NaN	NaN	NaN	NaN	0	NaN	NaN	NaN	4	4	4	9	9	9	49.867	0	25.094	512780000	6
NHLRC2	NHL repeat-containing protein 2	Q8NBF2;Q8NBF2-2	Q8NBF2;Q8NBF2-2			NaN	NaN	NaN	-0.397114	0.397114	NaN	NaN	NaN	NaN	5	5	5	7.3	7.3	7.3	79.443	0	29.52	271870000	9
NIT1	Nitrilase homolog 1	Q86X76-2;Q86X76-4;Q86X76;Q86X76-3;Q86X76-5	Q86X76-2;Q86X76-4;Q86X76;Q86X76-3;Q86X76-5			0.465414	-0.465414	NaN	NaN	NaN	NaN	5.95516	5.20308	5.79987	10	10	10	43.3	43.3	43.3	31.858	0	233.34	7022900000	88
NIT2	Omega-amidase NIT2	Q9NQR4	Q9NQR4			0.761561	-2.00341	NaN	0.650486	0.274985	0.316382	2.4919	1.84285	0.235678	16	16	16	63.4	63.4	63.4	30.608	0	225.81	11653000000	167
NKAP;NKAPL	NF-kappa-B-activating protein;NKAP-like protein	Q8N5F7;Q5M9Q1	Q8N5F7;Q5M9Q1			0.372454	0.0504478	0.0983032	0.246748	-0.794309	0.0263561	-0.170639	NaN	NaN	3	3	3	8.9	8.9	8.9	47.138	0	33.08	732590000	36
NME2;NME2P1	Nucleoside diphosphate kinase B;Putative nucleoside diphosphate kinase	P22392-2;P22392;O60361	P22392-2;P22392;O60361			-0.187124	0.0540183	-0.930662	0.763056	0.129965	0.170746	0.0302432	-0.0774094	-1.90578	12	12	5	68.2	68.2	23.6	30.137	0	93.283	21577000000	240
NMT1	Glycylpeptide N-tetradecanoyltransferase 1	P30419;P30419-2;O60551	P30419;P30419-2			0.104056	-0.588668	0.397262	0.217074	-0.0283175	-0.101407	0.0330038	-0.380601	-0.0284071	7	7	7	17.7	17.7	17.7	56.806	0	52.643	1415200000	83
NNT	NAD(P) transhydrogenase, mitochondrial	Q13423	Q13423			0.484767	-0.203952	-0.0294488	0.378382	0.10117	-0.730918	-0.0766404	0.152943	0.645701	7	7	7	6.4	6.4	6.4	113.89	0	48.765	894840000	37
NOMO2;NOMO1;NOMO3	Nodal modulator 2;Nodal modulator 1;Nodal modulator 3	Q5JPE7-2;Q15155;P69849;Q5JPE7;Q5JPE7-3	Q5JPE7-2;Q15155;P69849;Q5JPE7;Q5JPE7-3			-0.351286	-0.282221	NaN	0.105381	0.725908	-0.197783	0.101902	-0.24251	NaN	4	4	4	3.4	3.4	3.4	134.19	0	29.799	342240000	27
NONO	Non-POU domain-containing octamer-binding protein	Q15233-2;Q15233	Q15233-2;Q15233			-0.0371625	-0.195301	-0.0446545	-0.0203778	0.358597	-0.0611016	0.241726	0.20497	-0.343948	11	10	10	31.4	29.3	29.3	43.866	0	80.581	1991500000	44
NPEPPS	Puromycin-sensitive aminopeptidase	P55786;P55786-2;A6NEC2;A6NEC2-3;A6NEC2-2	P55786;P55786-2			0.00722376	0.295296	-0.79037	-0.0653013	0.350247	0.202904	0.0654456	0.333514	-1.19251	25	25	25	30.6	30.6	30.6	103.28	0	220.75	104660000000	347
NPM1	Nucleophosmin	P06748-2;P06748;P06748-3	P06748-2;P06748;P06748-3			0.149452	-0.416664	0.0755841	0.41081	-0.159342	-0.0598396	-0.14452	-0.294035	0.293579	8	8	8	30.2	30.2	30.2	29.464	0	70.017	7821200000	135
NRD1	Nardilysin	O43847;O43847-2	O43847;O43847-2			0	NaN	NaN	NaN	NaN	NaN	-0.0702515	-0.182714	NaN	7	7	7	5.5	5.5	5.5	131.7	0	42.622	435190000	12
NSDHL	Sterol-4-alpha-carboxylate 3-dehydrogenase, decarboxylating	Q15738	Q15738			NaN	-0.691405	NaN	-0.0417275	0.585479	0.147653	NaN	NaN	0.547695	3	3	3	8.3	8.3	8.3	41.9	0	19.473	419890000	25
NSF	Vesicle-fusing ATPase	P46459-2;P46459	P46459-2;P46459			0.290389	NaN	NaN	NaN	-0.290389	NaN	0.140286	NaN	0.297545	6	6	6	11	11	11	71.583	0	47.934	407790000	16
NSUN2	tRNA (cytosine(34)-C(5))-methyltransferase	Q08J23;Q08J23-2;Q08J23-3	Q08J23;Q08J23-2;Q08J23-3			0.0886545	-0.359387	0.237704	0.259969	0.165708	-0.392648	-0.143062	-0.0687838	0.849444	16	16	16	22.7	22.7	22.7	86.47	0	152.16	3539000000	108
NT5DC1	5-nucleotidase domain-containing protein 1	Q5TFE4;Q5TFE4-2	Q5TFE4			-0.0970303	-0.281971	NaN	0.3842	-0.0908295	0.0856308	-0.160442	0.360894	0.615902	3	3	3	7.5	7.5	7.5	51.844	0	25.494	348330000	15
NUDC	Nuclear migration protein nudC	Q9Y266	Q9Y266			0.0995264	0.0244837	0.45169	0.0410814	-0.471736	-0.145045	0.174205	0.214837	0.927114	11	11	11	38.1	38.1	38.1	38.242	0	104.98	3843400000	132
NUDT5	ADP-sugar pyrophosphatase	Q9UKK9	Q9UKK9			-0.229353	-0.11346	1.02526	-0.365736	-0.620607	0.303892	0.0709003	-0.155162	0.665289	12	12	12	52.1	52.1	52.1	24.327	0	145.25	3901000000	128
NUF2	Kinetochore protein Nuf2	Q9BZD4	Q9BZD4			0.263034	0.0618205	NaN	0.0612102	NaN	-0.386065	0.834371	0.378831	NaN	2	2	2	5	5	5	54.303	0.00074019	13.969	276880000	16
NUMA1	Nuclear mitotic apparatus protein 1	Q14980-2;Q14980;Q14980-4;Q14980-3;Q14980-5	Q14980-2;Q14980;Q14980-4;Q14980-3			0.172262	-0.736765	0.253008	0.0627324	0.567674	-0.318911	-1.02278	NaN	-0.126005	5	5	5	2.9	2.9	2.9	236.51	0	33.302	145900000	16
NUP153	Nuclear pore complex protein Nup153	P49790-2;P49790;P49790-3	P49790-2;P49790;P49790-3			NaN	NaN	NaN	0.12667	NaN	-0.12667	NaN	NaN	-0.33965	5	5	5	4.7	4.7	4.7	149.39	0	33.36	271560000	9
NUP205	Nuclear pore complex protein Nup205	Q92621	Q92621			-0.0428295	-0.423828	NaN	0.261351	NaN	0.205307	-0.339205	-0.124861	NaN	9	9	9	5.3	5.3	5.3	227.92	0	57.658	619440000	11
NUP214	Nuclear pore complex protein Nup214	P35658-2;P35658-4;P35658;P35658-3;P35658-5	P35658-2;P35658-4;P35658;P35658-3;P35658-5			-0.124952	-0.0372688	NaN	0.237412	0.0690067	-0.144199	-0.0485489	0.142648	0.521212	5	5	5	2.5	2.5	2.5	212.57	0	32.508	581810000	19
NUP88	Nuclear pore complex protein Nup88	Q99567	Q99567			NaN	-0.203133	NaN	NaN	0.313789	-0.110655	0.170434	0.259784	NaN	7	7	7	12.3	12.3	12.3	83.541	0	81.094	378350000	16
NUP93	Nuclear pore complex protein Nup93	Q8N1F7;Q8N1F7-2	Q8N1F7;Q8N1F7-2			0.416736	0.183919	-0.0266215	-0.0732371	-0.425084	-0.0757128	0.446767	0.627019	0.291784	6	6	6	7	7	7	93.487	0	45.532	632890000	30
NUTF2	Nuclear transport factor 2	P61970	P61970			NaN	0.257987	NaN	-0.530154	0.331193	-0.0590272	NaN	NaN	NaN	2	2	2	18.1	18.1	18.1	14.478	0.00075131	14.531	866550000	27
OAT	Ornithine aminotransferase, mitochondrial;Ornithine aminotransferase, hepatic form;Ornithine aminotransferase, renal form	P04181;P04181-2	P04181;P04181-2			0.457715	0.0806471	-0.308893	-0.451944	4.45048e-06	0.22247	0.268958	0.19146	NaN	13	13	13	42.8	42.8	42.8	48.534	0	111.84	4852100000	93
OLA1	Obg-like ATPase 1	Q9NTK5;Q9NTK5-2;Q9NTK5-3	Q9NTK5;Q9NTK5-2;Q9NTK5-3			-0.0472042	-0.00324936	NaN	-0.661605	0.463504	0.248555	1.00604	1.09198	0.147563	9	9	9	26.3	26.3	26.3	44.743	0	64.478	1761600000	61
OSBP	Oxysterol-binding protein 1	P22059;Q969R2-5;Q969R2-4;Q969R2-6;Q969R2-3;Q969R2-2;Q969R2	P22059			NaN	NaN	NaN	0.425248	-0.418731	-0.00651677	0.132909	NaN	NaN	4	4	4	7.1	7.1	7.1	89.42	0	25.848	412250000	8
OTUB1	Ubiquitin thioesterase OTUB1	Q96FW1;Q96FW1-2	Q96FW1	+		0.37473	-0.026488	-0.151488	0.581231	-0.597998	-0.179988	0.810249	0.762685	NaN	8	8	8	35.4	35.4	35.4	31.284	0	73.495	3890100000	102
OXCT1	Succinyl-CoA:3-ketoacid coenzyme A transferase 1, mitochondrial	P55809;P55809-2	P55809;P55809-2			0.0554155	-0.163439	0.00390371	0.256551	0.284887	-0.437318	0.126687	0.448953	0.429742	4	4	4	9	9	9	56.157	0	27.42	401730000	14
P4HA1	Prolyl 4-hydroxylase subunit alpha-1	P13674-3;P13674-2;P13674	P13674-3;P13674-2;P13674			0.0679211	0.0648903	NaN	0.200646	-0.263294	-0.0701633	0.234257	0.225161	NaN	4	4	4	9.1	9.1	9.1	58.957	0	24.379	555230000	11
P4HB	Protein disulfide-isomerase	P07237	P07237			-0.0715265	0.247491	-0.129722	-0.137923	0.0422926	0.0493879	0.0691442	0.221213	0.185327	26	26	26	52.6	52.6	52.6	57.116	0	323.31	21717000000	421
PA2G4	Proliferation-associated protein 2G4	Q9UQ80;Q9UQ80-2	Q9UQ80;Q9UQ80-2			0.170408	0.0182889	0.266378	0.16995	-0.429967	-0.195058	0.21449	0.245263	0.843154	15	15	15	44.4	44.4	44.4	43.786	0	174.61	10326000000	264
PABPC1	Polyadenylate-binding protein 1	P11940-2;P11940;Q9H361;Q4VXU2;Q4VXU2-2;Q96DU9-2;Q96DU9	P11940-2;P11940			0.319396	0.325391	0.332967	-0.392632	-0.505633	-0.0794878	0.315476	0.170495	0.715186	20	20	13	36.9	36.9	26.3	61.18	0	156.22	6286600000	158
PABPC4	Polyadenylate-binding protein 4	Q13310-2;Q13310-3;Q13310;P0CB38	Q13310-2;Q13310-3;Q13310			-0.0294634	0.0274957	0.397748	-0.106856	-0.0936247	-0.1953	-0.0565898	-0.214049	0.698749	13	7	6	17.4	10	8.6	69.578	0	47.597	1181900000	40
PACSIN2	Protein kinase C and casein kinase substrate in neurons protein 2	Q9UNF0-2;Q9UNF0	Q9UNF0-2;Q9UNF0			-0.29707	-0.129448	-0.0119438	0.316574	0.199898	-0.0780106	-0.101065	-0.544317	-0.434996	5	5	5	11.7	11.7	11.7	51.353	0	35.68	822050000	23
PAFAH1B1	Platelet-activating factor acetylhydrolase IB subunit alpha	P43034;P43034-2	P43034			0.141565	0.298458	-0.268644	0.462549	-0.573687	-0.0602417	0.21987	0.15056	0.258394	8	8	8	20.2	20.2	20.2	46.637	0	76.309	1790800000	61
PAFAH1B2	Platelet-activating factor acetylhydrolase IB subunit beta	P68402;P68402-3;P68402-2;P68402-4	P68402;P68402-3;P68402-2;P68402-4			NaN	0.0623274	NaN	-0.833756	0.538899	0.23253	-0.202598	NaN	NaN	3	3	3	21.8	21.8	21.8	25.569	0	32.61	538110000	23
PAFAH1B3	Platelet-activating factor acetylhydrolase IB subunit gamma	Q15102	Q15102			0.189681	NaN	NaN	0.127169	-0.31685	NaN	-0.117641	0.508113	NaN	3	3	3	20.3	20.3	20.3	25.734	0	39.341	797070000	15
PAICS	Multifunctional protein ADE2;Phosphoribosylaminoimidazole-succinocarboxamide synthase;Phosphoribosylaminoimidazole carboxylase	P22234;P22234-2	P22234;P22234-2			0.576899	-0.126468	0.0325152	-0.858167	-0.03836	0.413581	-0.056476	-0.19712	0.38095	9	9	9	21.4	21.4	21.4	47.079	0	124.61	2867800000	94
PAIP1	Polyadenylate-binding protein-interacting protein 1	Q9H074-3;Q9H074-2;Q9H074	Q9H074-3;Q9H074-2;Q9H074			-0.24656	0.0896259	NaN	0.0529934	-0.05942	0.16336	-0.334937	0.148204	NaN	4	4	4	9.8	9.8	9.8	42.006	0	27.438	719940000	20
PAK2	Serine/threonine-protein kinase PAK 2;PAK-2p27;PAK-2p34	Q13177;O75914-2;Q13153;Q13153-2;O75914;O75914-4;O75914-3	Q13177			NaN	-0.176028	NaN	0.36848	0.0292025	-0.221654	-0.0233221	0.122937	1.42002	3	3	3	5	5	5	58.042	0	17.798	373230000	6
PARK7	Protein deglycase DJ-1	Q99497	Q99497			0.263198	0.0574255	0.324883	-0.583325	0.0739622	-0.136144	0.860162	0.761884	1.30276	13	13	13	72.5	72.5	72.5	19.891	0	186.47	13031000000	173
PARP1	Poly [ADP-ribose] polymerase 1	P09874	P09874			0.00803884	0.191692	-0.50639	0.440866	-0.128417	-0.00578944	0.0454133	-0.262442	-0.949605	37	37	37	40.3	40.3	40.3	113.08	0	323.31	21468000000	422
PC	Pyruvate carboxylase, mitochondrial	P11498;P11498-2	P11498			-0.0565023	-0.0740957	-0.324891	0.111753	-0.0330839	0.376821	-0.448865	-0.573768	-0.97849	50	50	50	57.3	57.3	57.3	129.63	0	323.31	125980000000	1542
PCBP1	Poly(rC)-binding protein 1	Q15365;P57723-2;P57723	Q15365			-0.0589472	-0.0122096	0.351365	0.00205549	0.058904	-0.341168	-0.241707	0.365814	0.879352	9	5	5	32.3	19.1	19.1	37.497	0	41.024	2876900000	71
PCBP2	Poly(rC)-binding protein 2	Q15366-6;Q15366-3;Q15366;Q15366-2;Q15366-7;Q15366-8;Q15366-4;Q15366-5;P57721-2;P57721-3;P57721-5;P57721-4;P57721	Q15366-6;Q15366-3;Q15366;Q15366-2;Q15366-7;Q15366-8;Q15366-4;Q15366-5			0.0166616	-0.0956888	-0.0488138	0.134614	-0.145308	0.138535	0.043561	0.410823	0.815869	11	11	7	37.4	37.4	24.4	38.15	0	132.35	8317600000	167
PCCA	Propionyl-CoA carboxylase alpha chain, mitochondrial	P05165-2;P05165;P05165-3	P05165-2;P05165;P05165-3			0.186084	-0.0672483	-0.55343	0.294616	-0.219363	0.359342	-0.22436	-0.823083	-1.29069	31	31	31	52.6	52.6	52.6	77.047	0	303.52	22280000000	447
PCCB	Propionyl-CoA carboxylase beta chain, mitochondrial	P05166;P05166-2	P05166;P05166-2			NaN	-0.169179	NaN	-0.643909	-0.0279245	0.841012	NaN	NaN	NaN	4	4	4	10.2	10.2	10.2	58.215	0	25.85	199460000	8
PCMT1	Protein-L-isoaspartate(D-aspartate) O-methyltransferase	P22061;P22061-2	P22061;P22061-2			NaN	-0.0867953	NaN	0.285082	-0.226921	0.0286336	0.102248	-0.00970793	NaN	4	4	4	22.9	22.9	22.9	24.636	0	28.845	977430000	26
PCNA	Proliferating cell nuclear antigen	P12004	P12004			0.258249	0.545207	-1.21276	0.276691	-0.178702	0.311313	0.234165	0.126134	0.273166	12	12	12	53.6	53.6	53.6	28.768	0	252.16	7594300000	164
PCYT2	Ethanolamine-phosphate cytidylyltransferase	Q99447;Q99447-3;Q99447-2;Q99447-4	Q99447;Q99447-3;Q99447-2;Q99447-4			NaN	NaN	NaN	NaN	0.426064	-0.426064	NaN	NaN	NaN	2	2	2	6.9	6.9	6.9	43.835	0.00073529	13.691	123360000	7
PDCD6IP	Programmed cell death 6-interacting protein	Q8WUM4;Q8WUM4-2;Q8WUM4-3	Q8WUM4;Q8WUM4-2			0.335207	0.0681953	-0.302082	0.407406	-0.441124	-0.0676022	0.560125	0.513321	0.10528	21	21	21	26.4	26.4	26.4	96.022	0	158.78	3319000000	157
PDHA1	Pyruvate dehydrogenase E1 component subunit alpha, somatic form, mitochondrial	P08559-3;P08559;P08559-2;P08559-4;P29803	P08559-3;P08559;P08559-2;P08559-4			0.118877	-0.273327	-0.0786212	0.429504	-0.161967	-0.0344661	0.514406	0.490366	0.703819	7	7	7	17.8	17.8	17.8	40.188	0	43.396	1428600000	27
PDHB	Pyruvate dehydrogenase E1 component subunit beta, mitochondrial	P11177-3;P11177-2;P11177	P11177-3;P11177-2;P11177			0.235285	0.0981312	NaN	NaN	NaN	-0.333416	0.391939	0.754604	NaN	4	4	4	10.3	10.3	10.3	37.514	0	32.431	563700000	12
PDIA3	Protein disulfide-isomerase A3	P30101	P30101			0.360935	0.0383485	0.0545419	0.180932	-0.343453	-0.291304	0.270643	0.50414	0.185569	21	21	21	48.1	48.1	48.1	56.782	0	219.37	14383000000	260
PDIA4	Protein disulfide-isomerase A4	P13667	P13667			0.471229	0.304658	-0.108478	0.0339823	-0.347173	-0.354218	0.52225	0.841693	0.62658	30	30	30	49.8	49.8	49.8	72.932	0	323.31	14585000000	408
PDIA6	Protein disulfide-isomerase A6	Q15084-3;Q15084;Q15084-4;Q15084-5;Q15084-2	Q15084-3;Q15084;Q15084-4;Q15084-5;Q15084-2			0.113653	0.336551	NaN	-0.481741	0.235065	-0.203528	0.0484253	0.279502	0.936967	12	12	12	43.5	43.5	43.5	47.837	0	227.94	5756900000	127
PDLIM1	PDZ and LIM domain protein 1	O00151	O00151			NaN	-0.0806994	NaN	-0.145772	-0.079576	0.306048	0.274422	-0.00802946	NaN	5	5	5	19.1	19.1	19.1	36.071	0	52.072	695400000	28
PDS5A	Sister chromatid cohesion protein PDS5 homolog A	Q29RF7;Q29RF7-3	Q29RF7			NaN	-0.106249	0.106249	NaN	NaN	NaN	0.0156708	0.088213	0.798857	6	6	4	4.8	4.8	3.6	150.83	0	38.309	268800000	14
PEBP1	Phosphatidylethanolamine-binding protein 1;Hippocampal cholinergic neurostimulating peptide	P30086	P30086			-0.536088	0.458964	-0.117402	0.0941702	0.200797	-0.10044	0.381795	-0.0820917	0.705575	7	7	7	46.5	46.5	46.5	21.057	0	158.95	9326200000	155
PELP1	Proline-, glutamic acid- and leucine-rich protein 1	Q8IZL8	Q8IZL8			0.470207	-0.338813	NaN	NaN	NaN	-0.131394	0.386196	0.547004	NaN	5	5	5	7.6	7.6	7.6	119.7	0	42.805	822180000	17
PEPD	Xaa-Pro dipeptidase	P12955-3;P12955;P12955-2	P12955-3;P12955;P12955-2			0.111974	0.0781625	0.0233434	-0.175193	-0.274895	0.236608	-0.29439	-0.322354	0.0239404	8	8	8	21.2	21.2	21.2	47.261	0	71.522	1869000000	74
PFAS	Phosphoribosylformylglycinamidine synthase	O15067	O15067			-0.37752	-0.256249	-0.106003	0.363696	-0.00214068	0.378217	-0.0901534	-0.0469405	0.0279916	10	10	10	8.7	8.7	8.7	144.73	0	73.914	1238900000	59
PFDN2	Prefoldin subunit 2	Q9UHV9	Q9UHV9			NaN	0.439934	-0.354778	0.00631332	0.11422	-0.205688	0.212202	-0.353813	-0.134806	5	5	5	31.8	31.8	31.8	16.648	0	62.413	1221000000	20
PFDN5	Prefoldin subunit 5	Q99471;Q99471-3;Q99471-2	Q99471;Q99471-3			0.212789	-0.227189	NaN	-0.193149	0.207549	NaN	0.171607	0.034133	0.344237	3	3	3	26.6	26.6	26.6	17.328	0	31.779	452140000	15
PFKL	ATP-dependent 6-phosphofructokinase, liver type	P17858;P17858-2	P17858;P17858-2			0.00358136	-0.0906893	NaN	0.087108	NaN	NaN	0.211885	-0.578786	0.887639	9	7	7	12.9	9.4	9.4	85.018	0	56.56	809150000	18
PFKM	ATP-dependent 6-phosphofructokinase, muscle type	P08237-2;P08237;P08237-3	P08237-2;P08237;P08237-3			-0.191123	0.031953	NaN	0.463792	-0.46449	0.159867	-0.125245	-0.153544	NaN	4	3	3	6.3	5.1	5.1	81.775	0	24.326	309160000	12
PFKP	ATP-dependent 6-phosphofructokinase, platelet type	Q01813;Q01813-2	Q01813;Q01813-2			0.0279175	0.248834	NaN	-0.0935749	-0.132334	-0.0508427	0.494114	0.331398	0.346563	11	11	9	17.6	17.6	14	85.595	0	84.453	2696700000	80
PFN1	Profilin-1	P07737;CON__P02584	P07737			-0.0249516	0.338187	-0.580576	-0.63261	0.534403	0.365548	0.198872	0.114544	-1.95185	9	9	9	81.4	81.4	81.4	15.054	0	162.71	29448000000	267
PGAM1;PGAM2	Phosphoglycerate mutase 1;Phosphoglycerate mutase 2	P18669;P15259;Q8N0Y7	P18669;P15259			-0.300686	0.12467	-0.850923	0.229395	0.736132	0.0614112	-0.179588	0.40132	-0.786068	8	8	8	44.9	44.9	44.9	28.804	0	92.976	4073000000	103
PGAM5	Serine/threonine-protein phosphatase PGAM5, mitochondrial	Q96HS1-2;Q96HS1	Q96HS1-2;Q96HS1			0.170571	-0.044048	0.101302	0.522711	-0.722265	-0.0282704	-0.173803	-0.0992428	NaN	6	6	6	25.1	25.1	25.1	28.02	0	44.646	1110000000	45
PGD	6-phosphogluconate dehydrogenase, decarboxylating	P52209-2;P52209	P52209-2;P52209			0.298264	0.194706	-0.426645	0.241246	-0.22884	-0.0787312	0.216179	0.239497	-1.47173	18	18	18	42.6	42.6	42.6	51.872	0	173.78	10243000000	203
PGK1	Phosphoglycerate kinase 1	P00558;P00558-2;P07205	P00558;P00558-2			-0.720641	0.25441	-0.31112	-0.0357641	0.55168	0.261435	0.233891	0.385955	-0.917428	23	23	23	61.9	61.9	61.9	44.614	0	266.03	25354000000	350
PGLS	6-phosphogluconolactonase	O95336	O95336			0.629794	-0.213994	NaN	-0.362517	NaN	-0.0532827	0.553651	1.30861	NaN	6	6	6	34.1	34.1	34.1	27.547	0	46.894	941920000	27
PGM1	Phosphoglucomutase-1	P36871;P36871-2;P36871-3	P36871;P36871-2;P36871-3			0.0191104	-0.262737	0.142993	0.326296	0.199097	-0.42476	-0.0370572	0.290888	0.297944	17	17	17	32.4	32.4	32.4	61.448	0	144.03	3585400000	153
PGM2	Phosphoglucomutase-2	Q96G03;Q96G03-2	Q96G03			0.346592	0.130036	-0.0116402	0.332321	-0.845323	0.048014	0.376984	0.17317	0.310969	11	11	11	19.6	19.6	19.6	68.283	0	87.664	1878600000	46
PGM3	Phosphoacetylglucosamine mutase	O95394;O95394-3;O95394-4	O95394;O95394-3;O95394-4			-0.154903	-0.160429	0.194353	0.391518	0.140545	-0.411083	0.0326099	0.00979614	0.482391	8	8	8	13.5	13.5	13.5	59.851	0	49.097	1563500000	52
PGP	Phosphoglycolate phosphatase	A6NDG6	A6NDG6			NaN	-0.00704479	NaN	NaN	NaN	0.00704479	0.68463	0.558455	-0.032773	6	6	6	20.6	20.6	20.6	34.006	0	40.066	467980000	21
PGRMC1	Membrane-associated progesterone receptor component 1	O00264;O00264-2	O00264;O00264-2			0.00202974	0.0886691	-0.0385338	-0.0431172	0.0101703	-0.0192181	0.0978492	0.613896	-1.39288	6	6	6	30.3	30.3	30.3	21.671	0	44.528	1998800000	67
PHB	Prohibitin	P35232;P35232-2	P35232			-0.268304	0.217005	0.474469	-0.223251	-0.178991	-0.0209287	0.719216	0.734694	1.14628	11	11	11	46.3	46.3	46.3	29.804	0	93.218	3980800000	103
PHGDH	D-3-phosphoglycerate dehydrogenase	O43175	O43175			0.270641	0.26696	0.111188	-0.11724	-0.26796	-0.263589	0.310705	0.520156	0.520774	13	13	13	28.7	28.7	28.7	56.65	0	174.13	11177000000	229
PHPT1	14 kDa phosphohistidine phosphatase	Q9NRX4;Q9NRX4-2	Q9NRX4;Q9NRX4-2			-0.0387874	-0.333093	NaN	-0.16819	0.54007	NaN	0.0821233	NaN	0.957642	4	4	4	44.8	44.8	44.8	13.832	0	35.668	2311200000	37
PIN1	Peptidyl-prolyl cis-trans isomerase NIMA-interacting 1	Q13526	Q13526			NaN	0.188114	NaN	-0.639294	-0.0915227	0.542703	-0.889428	NaN	NaN	3	3	3	30.1	30.1	30.1	18.243	0	23.343	565690000	12
PIN4	Peptidyl-prolyl cis-trans isomerase NIMA-interacting 4	Q9Y237;Q9Y237-2;Q9Y237-3	Q9Y237;Q9Y237-2			NaN	0.028316	NaN	-0.408204	0.0438552	0.336032	NaN	NaN	NaN	4	4	4	48.1	48.1	48.1	13.81	0	39.559	789780000	37
PITPNA	Phosphatidylinositol transfer protein alpha isoform	Q00169	Q00169			NaN	NaN	NaN	NaN	0.0493498	-0.0493498	NaN	NaN	NaN	3	3	3	16.7	16.7	16.7	31.806	0	26.875	434910000	9
PITPNB	Phosphatidylinositol transfer protein beta isoform	P48739;P48739-2;P48739-3	P48739;P48739-2;P48739-3			0.103864	0.195651	0.343967	0.305648	-0.681903	-0.267228	0.258533	-0.299975	NaN	4	4	4	16.6	16.6	16.6	31.54	0	28.742	1118800000	56
PITRM1	Presequence protease, mitochondrial	Q5JRX3;Q5JRX3-2;Q5JRX3-3	Q5JRX3;Q5JRX3-2;Q5JRX3-3			0.0483974	NaN	0.0632614	0.189026	0.264487	-0.565172	-0.372614	0.00758781	0.94698	4	4	4	3.9	3.9	3.9	117.41	0	33.199	703500000	50
PKM	Pyruvate kinase PKM	P14618;P14618-3;P14618-2;P30613-2;P30613	P14618;P14618-3;P14618-2			-0.179736	0.319632	-0.637206	-0.234392	0.327599	0.404103	0.0360037	-0.38441	-0.765598	34	34	34	66.5	66.5	66.5	57.936	0	323.31	83660000000	801
PLAA	Phospholipase A-2-activating protein	Q9Y263	Q9Y263			-0.114398	-0.0278994	0.159179	0.144052	0.259727	-0.420661	0.166198	-0.0135943	1.0137	8	8	8	11.2	11.2	11.2	87.156	0	50.803	648870000	38
PLS3	Plastin-3	P13797;P13797-2;P13797-3;Q14651	P13797;P13797-2;P13797-3			0.095699	0.752588	-1.34704	0.0375382	0.298843	0.162376	0.172325	-0.0488342	-0.118473	27	27	22	52.7	52.7	44.3	70.81	0	323.31	15599000000	317
PMPCA	Mitochondrial-processing peptidase subunit alpha	Q10713;Q10713-2	Q10713			NaN	NaN	NaN	0.690681	-0.667729	-0.0229518	0.124023	0.587955	0.348182	4	4	4	8	8	8	58.252	0	28.762	3077400000	26
PNN	Pinin	Q9H307	Q9H307			0.0470181	-0.714037	0.296816	0.315943	0.444946	-0.390686	-0.66573	-0.325956	0.0819855	11	11	11	14.8	14.8	14.8	81.627	0	78.666	1598200000	83
PNP	Purine nucleoside phosphorylase	P00491	P00491			0.0386057	0.0891275	-0.648364	-0.227611	0.62032	0.127921	-0.161578	-0.251134	-0.20608	10	10	10	45.7	45.7	45.7	32.118	0	108.07	3239300000	103
POR	NADPH--cytochrome P450 reductase	P16435	P16435			0.176581	-0.176581	NaN	NaN	NaN	NaN	0.0483656	0.282737	0.322928	7	7	7	11.4	11.4	11.4	76.689	0	43.304	551490000	15
PPA1	Inorganic pyrophosphatase	Q15181	Q15181			0.0825993	0.258409	0.787243	-0.65663	-0.314896	-0.156725	0.101951	-0.232706	0.894655	7	7	7	28	28	28	32.66	0	49.312	2072900000	36
PPIA	Peptidyl-prolyl cis-trans isomerase A;Peptidyl-prolyl cis-trans isomerase A, N-terminally processed	P62937;P62937-2;P0DN26;A0A0B4J2A2;A0A075B767;A0A075B759;Q9Y536;F5H284;P0DN37	P62937;P62937-2			-0.5322	-0.1544	-0.0758155	-0.0735114	0.652315	0.183613	-0.0517581	-0.205942	0.356979	11	11	11	53.3	53.3	53.3	18.012	0	159.19	27801000000	365
PPIB	Peptidyl-prolyl cis-trans isomerase B	P23284	P23284			0.0775366	0.520402	-0.706027	0.411586	-0.165999	-0.137498	0.477241	0.170339	-0.289933	11	11	11	50.9	50.9	50.9	23.742	0	111.01	8992400000	164
PPIH	Peptidyl-prolyl cis-trans isomerase H	O43447-2;O43447	O43447-2;O43447			NaN	NaN	0.205685	NaN	NaN	-0.205685	NaN	NaN	NaN	2	2	2	17.2	17.2	17.2	14.492	0.00070771	12.968	322070000	10
PPM1G	Protein phosphatase 1G	O15355	O15355			0.367764	-0.0223827	0.245569	0.199997	-0.480713	-0.310234	-0.027523	0.255466	0.480898	10	10	10	26.6	26.6	26.6	59.271	0	95.963	2817200000	102
PPME1	Protein phosphatase methylesterase 1	Q9Y570;Q9Y570-4;Q9Y570-3;Q9Y570-2	Q9Y570;Q9Y570-4;Q9Y570-3;Q9Y570-2			NaN	NaN	NaN	0.513933	-0.306118	-0.207815	-0.488035	NaN	NaN	2	2	2	5.7	5.7	5.7	42.315	0.00072674	13.388	188330000	11
PPP1CA	Serine/threonine-protein phosphatase PP1-alpha catalytic subunit	P62136;P62136-2;P62136-3	P62136;P62136-2;P62136-3			NaN	0.176424	NaN	-1.25461	0.627243	0.450947	-1.00233	-0.0699692	NaN	8	8	4	30.3	30.3	12.7	37.512	0	92.629	1692400000	57
PPP1CB	Serine/threonine-protein phosphatase PP1-beta catalytic subunit	P62140	P62140			NaN	NaN	NaN	-0.0422338	0.0478427	-0.00560888	0.802985	NaN	NaN	7	3	3	29.7	11.9	11.9	37.186	0	24.819	341460000	23
PPP2CA;PPP2CB	Serine/threonine-protein phosphatase 2A catalytic subunit alpha isoform;Serine/threonine-protein phosphatase 2A catalytic subunit beta isoform	P67775;P62714;P67775-2	P67775;P62714;P67775-2			NaN	0.184188	NaN	-0.886708	0.285184	0.417335	-0.256842	NaN	NaN	4	4	4	13.6	13.6	13.6	35.594	0	58.615	1294600000	42
PPP2R1A	Serine/threonine-protein phosphatase 2A 65 kDa regulatory subunit A alpha isoform	P30153;P30154-5;P30154-4;P30154;P30154-2;P30154-3	P30153			-0.0079298	-0.235105	0.297048	0.0206079	0.162124	-0.236745	-0.0470381	-0.0280619	0.223464	18	18	18	38.2	38.2	38.2	65.308	0	163.77	9186200000	255
PPP2R2A;PPP2R2C	Serine/threonine-protein phosphatase 2A 55 kDa regulatory subunit B alpha isoform;Serine/threonine-protein phosphatase 2A 55 kDa regulatory subunit B gamma isoform	P63151;P63151-2;Q9Y2T4-3;Q9Y2T4-4;Q9Y2T4-2;Q9Y2T4;Q00005-6;Q00005;Q00005-2;Q00005-3;Q00005-4;Q00005-5;Q00005-7;Q66LE6	P63151;P63151-2;Q9Y2T4-3;Q9Y2T4-4;Q9Y2T4-2;Q9Y2T4			0.367034	-0.37815	NaN	0.529038	-0.273942	-0.24398	0.0416859	-0.256589	-0.531043	6	6	6	13.2	13.2	13.2	51.691	0	55.403	801150000	29
PPP2R4	Serine/threonine-protein phosphatase 2A activator	Q15257-3;Q15257-2;Q15257;Q15257-4	Q15257-3;Q15257-2;Q15257;Q15257-4			0.0964058	-0.368823	NaN	0.302481	0.186074	-0.216138	-0.227298	0.0275867	NaN	4	4	4	13.9	13.9	13.9	33.467	0	28.004	537880000	19
PPP2R5D	Serine/threonine-protein phosphatase 2A 56 kDa regulatory subunit delta isoform	Q14738-2;Q14738;Q14738-3;Q13362-2;Q13362-3;Q13362;Q13362-4;Q13362-5	Q14738-2;Q14738;Q14738-3			NaN	NaN	NaN	0.232516	-0.232516	NaN	NaN	0.189092	NaN	4	4	4	8.8	8.8	8.8	66.18	0	24.436	403870000	12
PPP3CA	Serine/threonine-protein phosphatase 2B catalytic subunit alpha isoform	Q08209-3;Q08209-2;Q08209;Q08209-4;Q08209-5;P16298-2;P16298-3;P16298;P16298-4	Q08209-3;Q08209-2;Q08209;Q08209-4;Q08209-5			0.412082	0.00855732	-0.194318	0.399003	-0.703446	0.0781221	0.210513	-0.0706949	NaN	6	6	6	13	13	13	52.671	0	40.122	809260000	30
PPP5C	Serine/threonine-protein phosphatase 5	P53041	P53041			0.144128	-0.208163	NaN	0.119709	0.0759598	-0.131634	-0.512644	-0.384589	0.572485	7	7	7	14.2	14.2	14.2	56.878	0	47.633	2087800000	46
PRAF2	PRA1 family protein 2	O60831	O60831			0.497993	-0.396742	NaN	NaN	0.45112	-0.552372	0.0550766	-1.03953	0.509136	3	3	3	20.2	20.2	20.2	19.258	0	36.906	1728200000	31
PRDX1	Peroxiredoxin-1	Q06830	Q06830			0.293825	0.0769421	-0.559496	0.396042	-0.166098	-0.0412143	0.273067	0.360538	-0.378199	12	12	9	60.8	60.8	47.7	22.11	0	113.16	29105000000	223
PRDX2	Peroxiredoxin-2	P32119;P32119-2	P32119			0.00494544	0.171747	0.115522	0.0704133	-0.0967372	-0.26589	0.0569359	0.119316	0.0675408	9	8	8	36.4	30.8	30.8	21.892	0	58.046	9837100000	151
PRDX3	Thioredoxin-dependent peroxide reductase, mitochondrial	P30048-2;P30048	P30048-2;P30048			-0.185407	0.290332	0.29069	-0.587438	0.317681	-0.125858	-0.144981	0.152985	0.466252	6	6	6	26.1	26.1	26.1	25.838	0	66.99	5292700000	128
PRDX4	Peroxiredoxin-4	Q13162	Q13162			0.137413	0.249161	-0.470195	0.216107	0.0304015	-0.162887	0.0376743	0.133501	-1.4683	10	8	8	45.4	39.9	39.9	30.54	0	107.28	5436500000	93
PRDX6	Peroxiredoxin-6	P30041	P30041			0.121027	0.137159	-0.498785	-0.308949	0.216123	0.333425	-0.139731	-0.0612644	-0.978247	15	15	15	70.1	70.1	70.1	25.035	0	165.08	8118300000	177
PREP	Prolyl endopeptidase	P48147	P48147			-0.443213	0.381583	NaN	-1.23575	0.601072	0.696311	-0.342843	-0.12716	-0.982077	29	29	29	46.5	46.5	46.5	80.699	0	323.31	10879000000	207
PRKDC	DNA-dependent protein kinase catalytic subunit	P78527;P78527-2	P78527;P78527-2			0.485316	-0.0267518	-0.259952	0.445857	-0.615739	-0.0287298	0.146846	0.0206477	-0.449621	69	69	69	17.5	17.5	17.5	469.08	0	323.31	13264000000	535
PRMT1	Protein arginine N-methyltransferase 1	Q99873-2;Q99873-3;Q99873;Q99873-5;Q9NR22-2;Q9NR22	Q99873-2;Q99873-3;Q99873			-0.0176754	0.381847	-0.877167	0.406944	-0.0542603	0.160311	0.413036	0.268995	NaN	9	9	9	24.2	24.2	24.2	39.928	0	110.37	5344700000	125
PRMT5	Protein arginine N-methyltransferase 5;Protein arginine N-methyltransferase 5, N-terminally processed	O14744;O14744-2;O14744-5;O14744-3;O14744-4	O14744;O14744-2;O14744-5;O14744-3;O14744-4			0.271324	0.100519	-0.0948245	0.251567	-0.577912	0.0493272	0.261125	0.0665449	0.106323	10	10	10	17.1	17.1	17.1	72.683	0	93.331	2712900000	92
PRPF19	Pre-mRNA-processing factor 19	Q9UMS4	Q9UMS4			0.0850178	0.208866	NaN	0.152336	-0.231564	-0.214655	-0.0148834	-0.136412	NaN	4	4	4	8.5	8.5	8.5	55.18	0	32.849	1793500000	37
PRPF40A	Pre-mRNA-processing factor 40 homolog A	O75400-2;O75400-3;O75400	O75400-2;O75400-3;O75400			0.132251	-0.23111	-0.185027	0.117339	-0.31975	0.486297	0.25843	-0.0128256	-0.251374	6	6	6	7	7	7	105.93	0	42.468	705600000	39
PRPF4B	Serine/threonine-protein kinase PRP4 homolog	Q13523	Q13523			0.513947	-0.184473	-0.315287	0.589161	-0.585167	-0.0181808	0.120953	0.590063	0.00922203	14	14	14	14.1	14.1	14.1	116.99	0	119.09	1881000000	108
PRPF6	Pre-mRNA-processing factor 6	O94906;O94906-2	O94906;O94906-2			NaN	0	NaN	NaN	NaN	NaN	0.270367	NaN	1.32051	3	3	3	3.5	3.5	3.5	106.92	0	18.408	165110000	5
PRPF8	Pre-mRNA-processing-splicing factor 8	Q6P2Q9	Q6P2Q9	+		0.255227	-0.384471	0.712468	-0.234083	-0.115936	-0.233205	-0.243615	-0.19127	0.603989	12	12	12	5.4	5.4	5.4	273.6	0	83.206	841990000	31
PRPS1;PRPS1L1	Ribose-phosphate pyrophosphokinase 1;Ribose-phosphate pyrophosphokinase 3	P60891;P60891-2;P21108	P60891;P60891-2;P21108			0.438847	-0.553572	0.211781	0.556156	-0.108046	-0.545166	-0.0542374	0.36524	-0.29455	6	6	3	18.9	18.9	8.8	34.834	0	47.571	1832300000	45
PRPS2	Ribose-phosphate pyrophosphokinase 2	P11908;P11908-2	P11908;P11908-2			NaN	0.0263028	NaN	0.366467	-0.523525	0.130755	-0.0790725	NaN	NaN	5	2	2	20.1	10.1	10.1	34.769	0.00077519	15.921	353200000	10
PRPSAP2	Phosphoribosyl pyrophosphate synthase-associated protein 2	O60256-3;O60256;O60256-4;O60256-2	O60256-3;O60256;O60256-4;O60256-2			NaN	NaN	NaN	-0.378281	0.378281	NaN	NaN	NaN	NaN	4	4	4	14.7	14.7	14.7	35.547	0	27.775	335610000	25
PSAT1	Phosphoserine aminotransferase	Q9Y617;Q9Y617-2	Q9Y617;Q9Y617-2			0.152476	0.169593	-0.45316	0.346816	-0.263923	0.0481977	0.327933	0.356063	-0.199105	12	12	12	34.3	34.3	34.3	40.422	0	95.63	4764200000	107
PSIP1	PC4 and SFRS1-interacting protein	O75475;O75475-3;O75475-2	O75475;O75475-3;O75475-2			0.338338	-0.338338	NaN	NaN	NaN	NaN	-0.234654	-0.106311	0.374383	2	2	2	4	4	4	60.103	0.00067981	12.083	296890000	29
PSMA1	Proteasome subunit alpha type-1	P25786;P25786-2	P25786;P25786-2			0.0285743	-0.292652	0.118807	0.211159	0.167887	-0.233776	0.0344528	0.184094	0.895733	9	9	9	36.5	36.5	36.5	29.555	0	69.83	3176600000	68
PSMA2	Proteasome subunit alpha type-2	P25787	P25787			0.0412111	0.317554	0.0479002	-0.698237	0.339305	-0.0477324	0.0425253	-0.404069	0.425487	7	7	7	45.7	45.7	45.7	25.898	0	63.04	1566000000	53
PSMA3	Proteasome subunit alpha type-3	P25788-2;P25788	P25788-2;P25788			-0.075421	0.116582	0.12948	0.215989	-0.379187	-0.00744311	0.59142	0.253627	0.411409	6	6	6	27	27	27	27.647	0	101.37	1918100000	23
PSMA4	Proteasome subunit alpha type-4	P25789;P25789-2	P25789;P25789-2			0.5144	-0.0209246	0.0225096	0.461673	-0.63675	-0.340907	0.113236	0.218343	0.242127	7	7	7	22.2	22.2	22.2	29.483	0	45.016	4297100000	93
PSMA5	Proteasome subunit alpha type-5	P28066;P28066-2	P28066;P28066-2			0.285951	0.181331	0.000165304	0.210723	-0.413981	-0.264189	0.263154	0.24168	-0.0647017	8	8	8	35.3	35.3	35.3	26.411	0	138.71	2777200000	82
PSMA6	Proteasome subunit alpha type-6	P60900;P60900-2;P60900-3	P60900;P60900-2			0.277349	-0.0380923	0.196204	0.417251	-0.643283	-0.209429	0.504808	0.47927	0.97598	6	6	6	24.8	24.8	24.8	27.399	0	66.205	2207000000	93
PSMA7	Proteasome subunit alpha type-7	O14818;O14818-2;O14818-4;Q8TAA3-2;Q8TAA3-5;Q8TAA3	O14818;O14818-2			0.405625	0.324252	-0.530636	0.370049	-0.320602	-0.248687	0.377278	0.617853	-2.12184	10	10	10	38.7	38.7	38.7	27.887	0	124.27	3543400000	109
PSMB1	Proteasome subunit beta type-1	P20618	P20618			0.0972258	0.144856	-0.371997	0.546567	-0.342519	-0.0741323	0.26635	-0.0955518	-0.48184	5	5	5	23.2	23.2	23.2	26.489	0	31.71	1132600000	41
PSMB2	Proteasome subunit beta type-2	P49721	P49721			0.00879606	-0.105006	0.409421	-0.21795	-0.11727	0.0220083	0.215808	0.303293	NaN	6	6	6	37.8	37.8	37.8	22.836	0	54.189	1366500000	47
PSMB3	Proteasome subunit beta type-3	P49720	P49720			NaN	0.330058	NaN	-0.96765	0.578719	0.0588732	0.242047	NaN	NaN	6	6	6	39	39	39	22.949	0	43.337	698280000	22
PSMB5	Proteasome subunit beta type-5	P28074;P28074-3;P28074-2	P28074;P28074-3			-0.114191	-0.56518	-0.133284	0.667778	0.236101	-0.0912247	0.0362492	-0.137529	-0.375225	9	9	9	31.2	31.2	31.2	28.48	0	104.82	3600000000	120
PSMB6	Proteasome subunit beta type-6	P28072	P28072			0.324526	-0.276033	0.340167	0.515345	-0.584562	-0.319444	0.503575	0.547539	0.589923	3	3	3	13	13	13	25.357	0	29.762	1581500000	61
PSMB7	Proteasome subunit beta type-7	Q99436;Q99436-2	Q99436			-0.398965	-0.253646	-0.277425	0.145781	0.514136	0.270119	-0.291017	0.107798	0.480014	5	5	5	21.3	21.3	21.3	29.965	0	38.294	2500800000	34
PSMC1	26S protease regulatory subunit 4	P62191;P62191-2	P62191;P62191-2			0.243074	-0.0641467	-0.0558459	0.423789	-0.282756	-0.264115	-0.0550887	-0.235121	-0.535578	12	12	12	37.7	37.7	37.7	49.184	0	117.46	2645300000	96
PSMC2	26S protease regulatory subunit 7	P35998;P35998-2	P35998;P35998-2			0.274195	0.116167	0.172413	-0.0528027	-0.258262	-0.251711	0.0614818	0.480637	0.901907	14	14	14	40	40	40	48.633	0	107.63	3270200000	116
PSMC3	26S protease regulatory subunit 6A	P17980	P17980			0.0938638	0.239219	-0.510865	-0.330769	0.25472	0.253831	0.153529	0.11424	-0.465871	12	12	12	38	38	38	49.203	0	113.76	1957500000	102
PSMC4	26S protease regulatory subunit 6B	P43686-2;P43686	P43686-2;P43686			-0.327636	-0.138763	0.295948	-0.126363	0.492667	-0.195852	0.0842002	-0.0632531	0.484761	14	14	14	43.9	43.9	43.9	43.507	0	111.83	2954800000	77
PSMC5	26S protease regulatory subunit 8	P62195-2;P62195;Q8NB90-3;Q8NB90-2;Q8NB90	P62195-2;P62195			0.230183	-0.139413	0.894808	-0.471402	-0.831847	0.317671	0.0702521	0.12172	1.38722	11	11	11	33.2	33.2	33.2	44.784	0	105.36	2366100000	97
PSMC6	26S protease regulatory subunit 10B	P62333	P62333			0.188608	-0.331663	0.259172	-0.493494	0.520075	-0.142698	0.0988789	0.100906	NaN	8	8	8	23.1	23.1	23.1	44.172	0	69.547	1475700000	59
PSMD1	26S proteasome non-ATPase regulatory subunit 1	Q99460-2;Q99460	Q99460-2;Q99460			0.168813	0.502934	-0.527135	0.0525522	-0.100013	-0.0971518	-0.159999	0.586938	0.718556	19	19	19	26.8	26.8	26.8	102.26	0	145.05	5012700000	116
PSMD10	26S proteasome non-ATPase regulatory subunit 10	O75832;O75832-2	O75832;O75832-2			NaN	NaN	-1.51288	1.12291	0.781554	-0.391585	NaN	NaN	-1.42501	2	2	2	7.5	7.5	7.5	24.428	0.00075815	14.798	498750000	10
PSMD11	26S proteasome non-ATPase regulatory subunit 11	O00231;O00231-2	O00231;O00231-2			0.285379	-0.104073	0.193595	0.162444	-0.319527	-0.217818	0.0492338	0.211715	0.3609	9	9	9	22.5	22.5	22.5	47.463	0	82.628	2618500000	111
PSMD12	26S proteasome non-ATPase regulatory subunit 12	O00232;O00232-2	O00232;O00232-2			0.241145	-0.0620009	0.0568097	0.312497	-0.151824	-0.396628	0.097175	0.230008	0.550372	8	8	8	19.7	19.7	19.7	52.904	0	68.629	1606400000	71
PSMD13	26S proteasome non-ATPase regulatory subunit 13	Q9UNM6;Q9UNM6-2	Q9UNM6;Q9UNM6-2			0.402582	0.154199	-0.0601962	-0.0625022	-0.398579	-0.0355037	0.204199	0.552652	0.109762	11	11	11	30.9	30.9	30.9	42.945	0	72.638	2156900000	80
PSMD14	26S proteasome non-ATPase regulatory subunit 14	O00487	O00487	+		0.490991	-0.203442	NaN	-0.287549	NaN	NaN	0.133802	0.37506	NaN	4	4	4	20	20	20	34.577	0	28.435	840070000	26
PSMD2	26S proteasome non-ATPase regulatory subunit 2	Q13200;Q13200-3;Q13200-2	Q13200;Q13200-3;Q13200-2			-0.00671895	-0.380788	-0.325487	0.139094	0.337605	0.236294	0.0161902	0.299023	-0.891673	18	18	18	24.7	24.7	24.7	100.2	0	227.11	5739800000	190
PSMD3	26S proteasome non-ATPase regulatory subunit 3	O43242;O43242-2	O43242;O43242-2			-0.0277596	-0.0872593	-0.161615	0.306223	-0.0131893	-0.0163994	0.358261	0.286753	0.651409	17	17	17	31.1	31.1	31.1	60.977	0	170.46	2835600000	102
PSMD4	26S proteasome non-ATPase regulatory subunit 4	P55036;P55036-2;A2A3N6	P55036;P55036-2			0.496756	0.0215626	NaN	0.342768	-0.621286	-0.239799	0.654634	0.616943	NaN	4	4	4	13.5	13.5	13.5	40.736	0	48.76	609910000	31
PSMD6	26S proteasome non-ATPase regulatory subunit 6	Q15008;Q15008-4;Q15008-3;Q15008-2	Q15008;Q15008-4;Q15008-3;Q15008-2			0.177919	-0.146731	0.014713	0.387594	-0.275259	-0.158236	0.0111844	0.0357529	-0.0993045	11	11	11	28	28	28	45.531	0	93.578	2205900000	66
PSMD7	26S proteasome non-ATPase regulatory subunit 7	P51665	P51665	+		NaN	0	NaN	NaN	NaN	NaN	-0.000112534	-0.448288	NaN	3	3	3	9.3	9.3	9.3	37.025	0	21.846	252440000	11
PSMD8	26S proteasome non-ATPase regulatory subunit 8	P48556	P48556			0.481433	-0.0527026	0.0793203	-0.0792586	-0.297154	-0.131638	0.208387	0.456725	0.0931695	6	6	6	16.3	16.3	16.3	39.611	0	40.736	1445300000	60
PSMD9	26S proteasome non-ATPase regulatory subunit 9	O00233-2;O00233;O00233-3	O00233-2;O00233;O00233-3			NaN	0	NaN	NaN	NaN	NaN	0.443542	0.411739	-0.363533	2	2	2	9.6	9.6	9.6	22.764	0.00067751	12.059	371600000	10
PSME1	Proteasome activator complex subunit 1	Q06323;Q06323-3;Q06323-2	Q06323;Q06323-3;Q06323-2			-0.0174587	0.577918	NaN	-0.110621	-0.862405	0.412566	-0.152547	0.0873539	NaN	8	8	8	36.5	36.5	36.5	28.723	0	77.53	1092200000	34
PSME2	Proteasome activator complex subunit 2	Q9UL46	Q9UL46			-0.287827	-0.846459	0.553861	0.580426	NaN	NaN	-0.00195217	0.444037	NaN	7	7	7	33.1	33.1	33.1	27.401	0	56.752	749820000	16
PSME3	Proteasome activator complex subunit 3	P61289;P61289-3;P61289-2	P61289;P61289-3;P61289-2			NaN	0.266213	NaN	-0.415349	-0.0258017	0.174937	NaN	NaN	NaN	2	2	2	10.2	10.2	10.2	29.506	0	17.132	421440000	9
PSMG1	Proteasome assembly chaperone 1	O95456-2;O95456	O95456-2;O95456			NaN	NaN	NaN	-0.886602	0.891962	-0.00535965	NaN	NaN	NaN	3	3	3	15	15	15	30.288	0	25.022	236520000	18
PTBP1	Polypyrimidine tract-binding protein 1	P26599;P26599-2;P26599-3;O95758-1;O95758-6;O95758-2;O95758;O95758-5;O95758-4	P26599;P26599-2;P26599-3			-0.228058	0.084616	-0.575063	0.12731	0.442664	0.148531	0.465819	0.372858	-1.49982	12	12	12	36	36	36	57.221	0	118.65	3140600000	92
PTGES3	Prostaglandin E synthase 3	Q15185-4;Q15185;Q15185-3;Q15185-2	Q15185-4;Q15185;Q15185-3			-0.326628	-1.83582	0.524835	0.894574	0.814533	-0.0714938	-0.0774409	-0.77521	0.189361	5	5	5	30.2	30.2	30.2	16.476	0	46.385	1029100000	64
PTPN11	Tyrosine-protein phosphatase non-receptor type 11	Q06124-2;Q06124;Q06124-3	Q06124-2;Q06124;Q06124-3			0.257569	-0.243277	0.0318901	NaN	0.128265	-0.174447	0.0430881	0.24294	NaN	4	4	4	6.6	6.6	6.6	68.01	0	25.221	249830000	10
PTRH2	Peptidyl-tRNA hydrolase 2, mitochondrial	Q9Y3E5	Q9Y3E5			NaN	NaN	NaN	NaN	NaN	0	-0.165455	NaN	NaN	2	2	2	23.5	23.5	23.5	19.193	0	18.795	289780000	3
PUF60	Poly(U)-binding-splicing factor PUF60	Q9UHX1-4;Q9UHX1-6;Q9UHX1-3;Q9UHX1-5;Q9UHX1-2;Q9UHX1	Q9UHX1-4;Q9UHX1-6;Q9UHX1-3;Q9UHX1-5;Q9UHX1-2;Q9UHX1			0.309711	0.245988	NaN	0.00894318	-0.219181	-0.345461	0.295196	-0.0925964	NaN	8	8	8	21.2	21.2	21.2	54.024	0	50.815	1069900000	29
PYGB	Glycogen phosphorylase, brain form	P11216	P11216			0.450233	0.215179	NaN	-0.304678	NaN	-0.360735	-0.636097	0.424984	0.119038	8	8	6	11.5	11.5	9.6	96.695	0	50.804	1059100000	11
PYGL	Glycogen phosphorylase, liver form	P06737-2;P06737;P11217-2;P11217	P06737-2;P06737			NaN	NaN	NaN	-0.238266	0.238266	NaN	NaN	NaN	0.326567	5	3	3	5.9	3.9	3.9	93.133	0	18.706	221930000	7
QARS	Glutamine--tRNA ligase	P47897;P47897-2	P47897;P47897-2			0.044651	-0.301903	0.0456619	0.299599	0.0785732	-0.166582	-0.701521	-0.791712	0.321213	15	15	14	21	21	21	87.798	0	106.91	1816800000	61
RAB10	Ras-related protein Rab-10	P61026	P61026			-0.021313	-0.139548	0.132621	-0.164032	0.717569	-0.525297	0.789928	0.0822674	0.676174	5	4	4	24	18.5	18.5	22.541	0	27.432	715680000	15
RAB14	Ras-related protein Rab-14	P61106	P61106			NaN	NaN	NaN	-0.4076	0.4076	NaN	NaN	NaN	NaN	3	3	3	13.5	13.5	13.5	23.897	0	17.75	222050000	11
RAB1A	Ras-related protein Rab-1A	P62820;P62820-2;P62820-3	P62820;P62820-2			-1.40218	0.599736	-0.68752	0.957938	0.537215	-0.00519276	0.721644	0.601085	1.04684	9	9	5	45.4	45.4	24.4	22.677	0	78.206	3432800000	81
RAB21	Ras-related protein Rab-21	Q9UL25	Q9UL25			0.138601	-0.261143	0.122541	NaN	NaN	NaN	0.0494766	NaN	0.4806	2	2	2	11.1	11.1	11.1	24.347	0	48.614	334460000	20
RAB5C	Ras-related protein Rab-5C	P51148;P51148-2;P20339-2;P20339	P51148;P51148-2			-0.203737	-0.0486444	0.276107	0.0771987	-0.1387	0.0377757	0.0334593	-0.319965	1.05546	8	8	5	47.7	47.7	32.9	23.482	0	87.311	2723200000	92
RAB7A	Ras-related protein Rab-7a	P51149	P51149			0.269215	NaN	NaN	NaN	0.136488	-0.405703	0.00041008	0.294233	NaN	4	4	4	21.7	21.7	21.7	23.489	0	28.472	883720000	16
RAB8A	Ras-related protein Rab-8A	P61006;P61006-2;P51153;Q92930;P59190-2;P59190;P20337;O95716;P20336	P61006;P61006-2			0.412464	-0.256331	-0.255377	-0.0390209	0.676618	-0.538353	0.227974	0.0205361	-0.445225	6	5	4	29	23.7	19.8	23.668	0	59.281	966710000	47
RABL6	Rab-like protein 6	Q3YEC7;Q3YEC7-2;Q3YEC7-4;Q3YEC7-5;Q3YEC7-6;Q3YEC7-3	Q3YEC7;Q3YEC7-2;Q3YEC7-4;Q3YEC7-5;Q3YEC7-6;Q3YEC7-3			0.124638	-0.0546104	NaN	-0.0623981	0.00688057	-0.0145103	-0.157201	0.0834015	NaN	4	4	4	4.9	4.9	4.9	79.548	0	25.81	295340000	4
RAC1;RAC3;RAC2	Ras-related C3 botulinum toxin substrate 1;Ras-related C3 botulinum toxin substrate 3;Ras-related C3 botulinum toxin substrate 2	P63000;P63000-2;P60763;P15153;Q9H4E5-2;P17081;Q9H4E5	P63000;P63000-2;P60763;P15153			0	NaN	NaN	NaN	NaN	NaN	-0.0270119	-0.269236	NaN	4	3	3	21.9	16.1	16.1	21.45	0	19.34	1436000000	31
RAD23B	UV excision repair protein RAD23 homolog B	P54727;P54727-2	P54727;P54727-2			0.0820869	0.165104	-0.092632	0.276427	0.189003	-0.619989	0.0944694	0.321625	0.669737	9	9	7	26.7	26.7	22.5	43.171	0	96.637	2417000000	97
RAN	GTP-binding nuclear protein Ran	P62826	P62826			0.392164	-0.00829887	-0.147926	0.0461674	-0.266266	-0.0158405	0.367813	0.214653	-0.00555801	9	9	9	42.1	42.1	42.1	24.423	0	84.815	15107000000	157
RANBP1	Ran-specific GTPase-activating protein	P43487-2;P43487;Q9C010;Q9C010-2	P43487-2;P43487			-0.186854	0.183519	0.248323	0.181142	-0.34532	-0.0808093	-0.069245	-0.0893962	0.641677	5	5	5	36	36	36	23.239	0	43.727	4573200000	66
RANBP2	E3 SUMO-protein ligase RanBP2	P49792;A6NKT7;Q99666-2;Q7Z3J3;Q99666;O14715	P49792			0	NaN	NaN	NaN	NaN	NaN	0.160206	-0.0384617	0.164787	6	6	6	2.5	2.5	2.5	358.2	0	35.655	351300000	7
RANBP3	Ran-binding protein 3	Q9H6Z4-3;Q9H6Z4-2;Q9H6Z4	Q9H6Z4-3;Q9H6Z4-2;Q9H6Z4			0.0257854	0.186401	NaN	0.244625	NaN	-0.456812	-0.159229	0.211094	NaN	5	5	5	11.2	11.2	11.2	53.41	0	28.368	275330000	10
RANGAP1	Ran GTPase-activating protein 1	P46060	P46060			0.553103	0.144955	-0.728462	0.575224	-0.649379	0.104559	0.415469	0.840359	0.872412	10	10	10	23.7	23.7	23.7	63.541	0	111.58	1628500000	73
RAP1B;RAP1A	Ras-related protein Rap-1b;Ras-related protein Rap-1A;Ras-related protein Rap-1b-like protein	P61224-2;P61224-3;P62834;P61224;P61224-4;A6NIZ1	P61224-2;P61224-3;P62834;P61224;P61224-4;A6NIZ1			0.524453	0.280109	-0.272389	0.512031	-0.580861	-0.463343	0.23804	0.376382	NaN	4	4	4	24.8	24.8	24.8	15.356	0	29.663	1185300000	38
RARS	Arginine--tRNA ligase, cytoplasmic	P54136;P54136-2	P54136;P54136-2			0.421754	0.00145817	0.0587854	0.163634	-0.548434	-0.0971975	0.0962973	0.192733	0.412892	13	13	13	20.9	20.9	20.9	75.378	0	85.707	1880600000	50
RBBP4	Histone-binding protein RBBP4	Q09028-3;Q09028;Q09028-2;Q09028-4	Q09028-3;Q09028;Q09028-2;Q09028-4			NaN	NaN	NaN	0.0166073	-0.0833092	0.0667019	NaN	NaN	NaN	8	2	2	20.7	10	10	46.158	0	25.026	811390000	9
RBBP6	E3 ubiquitin-protein ligase RBBP6	Q7Z6E9-4;Q7Z6E9-2;Q7Z6E9	Q7Z6E9-4;Q7Z6E9-2;Q7Z6E9			0.199247	NaN	0.265817	0.0511124	0.00824852	-0.524424	-1.51898	-0.924237	0.116725	3	3	3	3.5	3.5	3.5	106.04	0	17.415	384840000	13
RBBP7	Histone-binding protein RBBP7	Q16576;Q16576-2	Q16576;Q16576-2			0.0402759	0.047253	-0.888763	-0.0261571	0.285702	0.541689	0.548605	0.140181	0.288517	9	9	3	21.9	21.9	11.5	47.82	0	86.495	5920700000	115
RBM12	RNA-binding protein 12	Q9NTZ6	Q9NTZ6			-0.193045	0.025383	NaN	0.385254	-0.217592	NaN	0.167728	0.17749	NaN	4	4	4	4.6	4.6	4.6	97.394	0	25.095	523180000	16
RBM25	RNA-binding protein 25	P49756;P49756-2;P49756-3	P49756			-0.16034	-0.373666	NaN	0.841884	-0.307878	NaN	-0.307811	0.0406733	NaN	3	3	3	5.6	5.6	5.6	100.18	0	22.612	579240000	16
RBM39	RNA-binding protein 39	Q14498-3;Q14498-2;Q14498	Q14498-3;Q14498-2;Q14498			-0.583876	-0.113919	0.00466665	-0.431153	0.73327	0.391012	0.128806	0.362571	0.761369	7	7	7	18.9	18.9	18.9	57.089	0	135.55	2392700000	98
RBM4;RBM4B	RNA-binding protein 4;RNA-binding protein 4B	Q9BWF3;Q9BWF3-4;Q9BQ04;Q9BWF3-3;Q9BWF3-2;Q96PK6-5	Q9BWF3;Q9BWF3-4;Q9BQ04;Q9BWF3-3;Q9BWF3-2			0.35546	-0.237819	0.114192	0.244918	-0.476752	NaN	0.572084	0.251086	NaN	6	6	6	22.8	22.8	22.8	40.313	0	50.03	659620000	23
RCC2	Protein RCC2	Q9P258	Q9P258			0.223927	-0.459173	-0.285234	0.478016	0.0470734	-0.00460815	0.000740051	-0.299536	-1.26484	9	9	9	18.6	18.6	18.6	56.084	0	76.575	2273000000	66
RDH11	Retinol dehydrogenase 11	Q8TC12-3;Q8TC12;Q8TC12-2	Q8TC12-3;Q8TC12;Q8TC12-2			-0.0520201	NaN	NaN	0.0520201	NaN	NaN	-0.182546	-0.135064	NaN	2	2	2	10.9	10.9	10.9	27.402	0.00074074	14.024	240810000	8
RDX	Radixin	P35241;P35241-5;P35241-4;P35241-2;P35241-3	P35241;P35241-5;P35241-4			-0.0843534	-0.673413	-0.334701	0.686126	1.18578	-0.779437	-0.387923	-0.107682	0.426589	14	6	6	22.3	10.1	10.1	68.563	0	36.377	519980000	17
RECQL	ATP-dependent DNA helicase Q1	P46063	P46063			-0.403962	-0.202	0.345964	0.539295	-0.0140613	-0.265236	-0.119364	0.115635	0.107658	8	8	8	13.9	13.9	13.9	73.457	0	75.458	1489000000	51
REEP5	Receptor expression-enhancing protein 5	Q00765	Q00765			NaN	-0.542607	NaN	0.405151	0.122158	0.0152984	0.017488	NaN	0.708557	3	3	3	11.1	11.1	11.1	21.493	0	53.023	2215000000	31
RFC2	Replication factor C subunit 2	P35250-2;P35250	P35250-2;P35250			0.140204	-0.109326	-0.160922	0.130044	NaN	NaN	0.153419	0.289979	NaN	3	3	3	9.4	9.4	9.4	35.243	0	18.104	278460000	7
RHOA;RHOC	Transforming protein RhoA;Rho-related GTP-binding protein RhoC	P61586;P08134	P61586;P08134			-0.76042	-1.04812	0.373152	0.557692	0.661843	0.215855	-0.119335	-1.12113	-0.178322	3	3	3	16.1	16.1	16.1	21.768	0	23.85	1535100000	57
RNGTT	mRNA-capping enzyme;Polynucleotide 5-triphosphatase;mRNA guanylyltransferase	O60942-3;O60942-4;O60942-2;O60942	O60942-3;O60942-4;O60942-2;O60942			NaN	NaN	0	NaN	NaN	NaN	-0.1511	-0.534975	0.468828	2	2	2	4.4	4.4	4.4	52.533	0.0007722	15.577	125710000	10
RNH1	Ribonuclease inhibitor	P13489	P13489			-0.077002	0.338314	NaN	0.101343	-0.480153	0.117498	0.318884	-0.0606026	NaN	4	4	4	11.5	11.5	11.5	49.973	0	54.024	1242800000	34
RNPEP	Aminopeptidase B	Q9H4A4	Q9H4A4			0.300853	-0.00537904	-1.02197	0.675008	-0.0363544	0.0878407	0.327636	0.113302	-0.28615	10	10	10	18.3	18.3	18.3	72.595	0	138.68	2042400000	62
RNPS1	RNA-binding protein with serine-rich domain 1	Q15287-3;Q15287-2;Q15287	Q15287-3;Q15287-2;Q15287			-0.000712585	0.453358	NaN	-0.363393	-0.0127823	-0.0764706	0.150979	-0.0611469	NaN	2	2	2	8.6	8.6	8.6	30.354	0	17.548	548140000	22
RPA1	Replication protein A 70 kDa DNA-binding subunit;Replication protein A 70 kDa DNA-binding subunit, N-terminally processed	P27694	P27694			-0.000489871	-0.100099	0.161639	0.627365	-0.534698	-0.153717	-0.0847928	0.252741	0.517189	13	13	13	21.8	21.8	21.8	68.137	0	113.79	2463800000	103
RPA2	Replication protein A 32 kDa subunit	P15927;P15927-2;P15927-3	P15927;P15927-2;P15927-3			0.0881208	-0.151124	NaN	0.0630029	NaN	NaN	0.0888303	NaN	NaN	2	2	2	7.4	7.4	7.4	29.247	0	17.717	660640000	21
RPA3	Replication protein A 14 kDa subunit	P35244	P35244			NaN	0.555637	NaN	-0.995322	0.442291	-0.00260592	NaN	NaN	NaN	4	4	4	42.1	42.1	42.1	13.569	0	28.082	342820000	12
RPL10	60S ribosomal protein L10	P27635;Q96L21	P27635			0.336556	-0.0778341	-0.496802	0.391978	0.521697	-0.675595	-0.127788	-0.833264	-2.07638	8	8	8	29.9	29.9	29.9	24.604	0	74.521	6283800000	102
RPL10A	60S ribosomal protein L10a	P62906	P62906			-0.190532	0.00799402	-0.0806328	0.176131	-0.246721	0.333762	0.0679916	-0.445631	0.0201324	7	7	7	33.6	33.6	33.6	24.831	0	53.49	4095600000	112
RPL11	60S ribosomal protein L11	P62913	P62913			0.03396	0.171156	-0.388226	0.107629	0.135627	-0.0601466	0.267521	0.458454	0.849767	5	5	1	28.1	28.1	6.7	20.252	0	142.19	6400800000	101
RPL12	60S ribosomal protein L12	P30050;P30050-2	P30050;P30050-2			0.290703	0.428527	0.0197436	-1.06765	0.250781	0.0779006	-0.0910562	-0.373546	NaN	5	5	5	43	43	43	17.818	0	86.21	3432600000	70
RPL13	60S ribosomal protein L13	P26373;P26373-2	P26373;P26373-2			0.190518	0.224667	-0.534975	0.294466	0.221377	-0.396053	-0.276613	0.0107597	-1.8321	17	17	17	55.9	55.9	55.9	24.261	0	302.71	67608000000	459
RPL13A	60S ribosomal protein L13a	P40429;Q6NVV1	P40429			0.12138	-0.0644086	-0.0751909	0.297663	-0.299144	0.0196997	0.177245	-0.0714753	-0.597045	12	12	12	42.9	42.9	42.9	23.577	0	99.023	42561000000	389
RPL14	60S ribosomal protein L14	P50914	P50914			-0.193661	0.122559	-0.319263	0.493345	0.0815372	-0.184517	-0.558008	-0.356098	NaN	7	7	7	31.2	31.2	31.2	23.432	0	76.093	4281600000	94
RPL15	60S ribosomal protein L15	P61313;P61313-2	P61313			-0.130083	0.339885	-1.21687	0.668901	0.491968	-0.153803	-0.138901	-0.106579	-1.86541	15	15	15	51	51	51	24.146	0	196.64	48861000000	407
RPL17	60S ribosomal protein L17	P18621;P18621-3;P18621-2	P18621;P18621-3;P18621-2			0.638789	0.576749	-0.95184	0.0230649	-0.130727	-0.156037	0.269639	0.122203	-3.246	9	9	9	38.6	38.6	38.6	21.397	0	78.966	11177000000	155
RPL18	60S ribosomal protein L18	Q07020;Q07020-2	Q07020;Q07020-2			-0.220739	0.127184	-0.681612	0.555326	0.114805	0.105036	-0.446764	-0.736742	-1.38658	12	12	12	53.2	53.2	53.2	21.634	0	199.76	192470000000	753
RPL18A	60S ribosomal protein L18a	Q02543	Q02543			-0.287608	0.108141	NaN	-0.230942	0.107298	0.303112	-1.82718	-1.45542	-1.63669	6	6	6	31.2	31.2	31.2	20.762	0	44.541	3689500000	61
RPL19	60S ribosomal protein L19	P84098	P84098			-0.793225	0.492227	-0.627585	0.349147	0.796985	-0.217551	-0.0244907	-0.269356	-2.37103	8	8	8	27	27	27	23.466	0	99.861	13155000000	89
RPL21	60S ribosomal protein L21	P46778	P46778			-0.396958	0.395123	-0.670554	0.475629	0.499486	-0.302726	-0.427438	-0.302472	-0.362876	7	7	7	38.1	38.1	38.1	18.565	0	55.977	11845000000	145
RPL22	60S ribosomal protein L22	P35268	P35268			0.32799	0.203783	-0.548185	0.204468	-0.297306	0.109249	0.467862	0.36447	-0.863746	3	3	3	30.5	30.5	30.5	14.787	0	27.963	4118500000	53
RPL23	60S ribosomal protein L23	P62829	P62829			-0.11734	0.306917	-0.443001	0.146906	0.0499477	0.0565701	0.128847	-0.463518	NaN	5	5	5	43.6	43.6	43.6	14.865	0	32.205	5637000000	63
RPL23A	60S ribosomal protein L23a	P62750	P62750			0	NaN	NaN	NaN	NaN	NaN	-0.64012	-0.275524	NaN	2	2	2	13.5	13.5	13.5	17.695	0.00070175	12.74	910630000	21
RPL24	60S ribosomal protein L24	P83731	P83731			-0.14314	0.688325	NaN	-0.27789	-0.036084	-0.231211	0.290553	-0.176295	NaN	4	4	4	24.2	24.2	24.2	17.779	0	30.248	5101300000	66
RPL26;RPL26L1	60S ribosomal protein L26;60S ribosomal protein L26-like 1	P61254;Q9UNX3	P61254;Q9UNX3			NaN	1.03797	NaN	NaN	-0.403592	-0.634373	0.794524	1.21518	NaN	4	4	4	22.8	22.8	22.8	17.258	0	28.454	635850000	30
RPL27	60S ribosomal protein L27	P61353	P61353			NaN	0.199895	NaN	0.650445	-0.741082	-0.109259	0.108449	-0.185107	NaN	4	4	4	36	36	36	15.798	0	30.458	890890000	20
RPL27A	60S ribosomal protein L27a	P46776	P46776			0.702862	0.476243	-1.20292	-0.00138982	-0.0744146	0.0996157	0.157925	0.132634	-1.07293	7	7	7	39.2	39.2	39.2	16.561	0	61.296	24584000000	152
RPL28	60S ribosomal protein L28	P46779;P46779-2;P46779-3;P46779-4;P46779-5	P46779;P46779-2;P46779-3;P46779-4;P46779-5			0.184509	-0.552021	0.250303	0.451748	0.177419	-0.511957	-0.680374	-0.0408634	0.240369	13	13	13	56.9	56.9	56.9	15.747	0	179.86	44159000000	363
RPL29	60S ribosomal protein L29	P47914	P47914			0.191707	-0.593667	0.227435	0.156619	0.62042	-0.602515	-0.358729	-0.329159	-1.0858	7	7	7	30.8	30.8	30.8	17.752	0	49.471	25572000000	146
RPL3	60S ribosomal protein L3	P39023;Q92901	P39023			0.221346	-0.0577583	-0.154457	0.442261	0.0302467	-0.481638	-0.50897	-0.365562	0.327234	15	15	15	39.7	39.7	39.7	46.108	0	158.96	16225000000	225
RPL30	60S ribosomal protein L30	P62888	P62888			-0.801347	0.181664	NaN	0.406173	0.346522	-0.133012	-0.0393135	-0.433465	0.238772	6	6	6	49.6	49.6	49.6	12.784	0	60.717	1784600000	36
RPL31	60S ribosomal protein L31	P62899;P62899-3;P62899-2	P62899;P62899-3;P62899-2			0.275728	0.139118	0.13368	0.237751	-0.175728	-0.61055	-0.422874	-0.405827	-0.499132	7	7	7	52	52	52	14.463	0	68.542	18910000000	165
RPL32	60S ribosomal protein L32	P62910	P62910			-0.141544	-0.0623302	-0.778435	0.656321	0.252254	0.0737343	-0.1833	-0.4331	-1.51596	14	14	14	67.4	67.4	67.4	15.86	0	157	76905000000	513
RPL34	60S ribosomal protein L34	P49207	P49207			-0.521667	-0.206951	-0.0581338	0.399113	0.781123	-0.393484	-0.514862	-0.422773	-0.802112	9	9	9	39.3	39.3	39.3	13.293	0	121.76	22895000000	175
RPL35	60S ribosomal protein L35	P42766	P42766			-0.321923	0.428861	-0.446326	0.631616	-0.0716025	-0.220626	-0.122014	-0.634328	-2.00597	4	4	4	29.3	29.3	29.3	14.551	0	79.279	18587000000	119
RPL35A	60S ribosomal protein L35a	P18077	P18077			0.445287	0.292593	-0.339213	0.235084	-0.615193	-0.0185588	0.186067	0.190609	-0.885689	4	4	4	27.3	27.3	27.3	12.538	0	22.63	1205100000	22
RPL36	60S ribosomal protein L36	Q9Y3U8	Q9Y3U8			0.0580568	0.582891	-0.415904	0.0500727	-0.245868	-0.0292482	-0.656075	-0.330718	-1.70154	7	7	7	40	40	40	12.254	0	93.621	42799000000	384
RPL36AL	60S ribosomal protein L36a-like	Q969Q0	Q969Q0			-0.737167	-0.455675	-0.131113	0.838532	0.460181	0.0252422	-1.37942	-1.33601	-1.03141	5	5	2	32.1	32.1	9.4	12.469	0	33.904	7436000000	65
RPL37	60S ribosomal protein L37	P61927	P61927			-3.83785	NaN	NaN	0.731539	1.96098	1.14534	NaN	NaN	NaN	3	3	3	18.6	18.6	18.6	11.078	0	22.81	1942400000	21
RPL38	60S ribosomal protein L38	P63173	P63173			NaN	0.297884	NaN	-0.429074	-0.265036	0.396226	-0.945021	-0.618817	NaN	5	5	5	50	50	50	8.2178	0	35.107	1207600000	47
RPL39P5;RPL39	Putative 60S ribosomal protein L39-like 5;60S ribosomal protein L39	Q59GN2;P62891	Q59GN2;P62891			-1.03356	0.630889	NaN	1.18374	-0.93382	0.152756	-1.13336	-0.860912	NaN	3	3	3	23.5	23.5	23.5	6.3225	0	28.446	7801600000	86
RPL4	60S ribosomal protein L4	P36578	P36578			-0.155951	0.343556	-0.454194	0.109168	0.184623	-0.0272017	-0.136149	-0.133628	-0.539538	18	18	18	41.7	41.7	41.7	47.697	0	179.91	28039000000	370
RPL5	60S ribosomal protein L5	P46777	P46777			0.33665	0.129972	-1.07781	0.618943	0.0752001	-0.0829573	0.0727606	0.0602407	-1.54566	9	9	9	23.9	23.9	23.9	34.362	0	94.936	7978000000	153
RPL6	60S ribosomal protein L6	Q02878	Q02878			-0.0604083	-0.308726	0.0186857	0.41122	0.161311	-0.222083	-0.390093	-0.382182	-0.419636	19	19	19	51.7	51.7	51.7	32.728	0	323.31	67225000000	654
RPL7	60S ribosomal protein L7	P18124	P18124			0.361331	0.342916	-0.939296	0.310554	-0.0100374	-0.0654669	0.229516	0.343389	0.0732374	15	15	15	46.8	46.8	46.8	29.225	0	133.96	13254000000	235
RPL7A	60S ribosomal protein L7a	P62424	P62424			0.377763	0.144807	-0.276982	0.21396	-0.07499	-0.384558	-0.307524	-0.111304	-0.42978	12	12	12	33.5	33.5	33.5	29.995	0	104.26	11952000000	214
RPL8	60S ribosomal protein L8	P62917	P62917			0.20915	-0.214455	-0.135309	0.593607	-0.0280762	-0.424917	-0.0691967	-0.0384445	0.155739	9	9	9	25.7	25.7	25.7	28.024	0	83.575	10590000000	156
RPL9	60S ribosomal protein L9	P32969	P32969			-0.0881472	-0.252694	0.328042	-0.968032	0.607799	0.373033	-0.477433	-0.390271	-0.644143	7	7	7	47.9	47.9	47.9	21.863	0	88.066	2841800000	60
RPLP0;RPLP0P6	60S acidic ribosomal protein P0;60S acidic ribosomal protein P0-like	P05388;P05388-2;Q8NHW5	P05388;P05388-2;Q8NHW5			0.168209	-0.0803264	0.188429	-0.276854	0.175789	-0.175246	0.183426	0.540683	0.474991	11	11	11	46.1	46.1	46.1	34.273	0	131.67	9035500000	168
RPLP2	60S acidic ribosomal protein P2	P05387	P05387			NaN	0	NaN	NaN	NaN	NaN	-0.521166	NaN	NaN	3	3	2	32.2	32.2	17.4	11.665	0	20.516	150270000	5
RPN1	Dolichyl-diphosphooligosaccharide--protein glycosyltransferase subunit 1	P04843	P04843			0.133419	-0.195933	0.164674	-0.187462	0.328924	-0.243622	-0.171116	-0.113486	-0.0261825	14	14	14	24.2	24.2	24.2	68.569	0	151.73	2164000000	91
RPS10	40S ribosomal protein S10	P46783;Q9NQ39	P46783			NaN	0.264753	NaN	-0.621626	0.425336	-0.0684628	NaN	NaN	NaN	3	3	3	23	23	23	18.898	0	35.636	225030000	17
RPS11	40S ribosomal protein S11	P62280	P62280			0.109229	0.00541751	0.218043	0.497836	-0.510766	-0.319759	0.0949656	0.0799929	0.494038	8	8	8	34.2	34.2	34.2	18.431	0	76.42	10413000000	193
RPS12	40S ribosomal protein S12	P25398	P25398			-0.386094	-0.0855303	0.725984	-1.17837	0.437213	0.486794	0.40025	0.314506	1.31346	4	4	4	37.1	37.1	37.1	14.515	0	129.19	8527500000	93
RPS14	40S ribosomal protein S14	P62263	P62263			-0.132147	0.156955	-0.402554	0.184532	0.195026	-0.0018123	-0.37159	-0.308529	-0.729554	8	8	8	40.4	40.4	40.4	16.273	0	86.113	10872000000	149
RPS15A	40S ribosomal protein S15a	P62244	P62244			0.720731	0.270124	-1.31972	0.281547	-0.206	0.253318	0.874433	0.962106	-1.18525	5	5	5	36.2	36.2	36.2	14.839	0	39.704	6366200000	85
RPS16	40S ribosomal protein S16	P62249	P62249			0.0825342	0.166313	-0.15524	0.333501	-0.538146	0.111038	0.306297	0.484168	-0.280842	9	9	9	52.1	52.1	52.1	16.445	0	77.142	9509900000	185
RPS17	40S ribosomal protein S17	P08708	P08708			-1.43129	0.0881927	NaN	-0.103839	0.240893	1.20604	-0.22593	-0.749692	NaN	5	5	5	47.4	47.4	47.4	15.55	0	55.894	2006900000	66
RPS18	40S ribosomal protein S18	P62269	P62269			-0.102463	0.687767	-0.106524	-0.179751	-0.299029	NaN	NaN	0.86656	0.425521	3	3	3	21.1	21.1	21.1	17.718	0	24.502	805580000	25
RPS19	40S ribosomal protein S19	P39019	P39019			NaN	0	NaN	NaN	NaN	NaN	NaN	NaN	NaN	2	2	2	13.1	13.1	13.1	16.06	0.0006854	12.3	148210000	4
RPS2	40S ribosomal protein S2	P15880	P15880			0.0983629	-0.151242	0.373237	0.161088	-0.353711	-0.127734	0.0497351	-0.101129	0.152287	14	14	14	49.8	49.8	49.8	31.324	0	118.26	12854000000	227
RPS20	40S ribosomal protein S20	P60866;P60866-2	P60866;P60866-2			-0.0312061	-0.0448971	NaN	0.505028	-0.40016	-0.0287647	0.527878	0.218859	-2.01883	2	2	2	19.3	19.3	19.3	13.373	0	27.52	5688800000	74
RPS23	40S ribosomal protein S23	P62266	P62266			-0.710245	-0.217592	-0.332047	0.696074	0.75458	-0.190769	0.184462	-0.431124	-0.800598	5	5	5	42.7	42.7	42.7	15.807	0	49.189	7211100000	103
RPS24	40S ribosomal protein S24	P62847-2;P62847-3;P62847;P62847-4	P62847-2;P62847-3;P62847;P62847-4			NaN	0.720531	NaN	-1.01608	0.503087	-0.20754	0.260768	NaN	NaN	3	3	3	26.9	26.9	26.9	15.069	0	22.039	740210000	47
RPS25	40S ribosomal protein S25	P62851	P62851			0.468023	0.368799	-1.08867	0.252323	-0.0359904	0.035518	-0.0254523	0.447908	-2.2182	5	5	5	29.6	29.6	29.6	13.742	0	39.308	6278500000	103
RPS26;RPS26P11	40S ribosomal protein S26;Putative 40S ribosomal protein S26-like 1	P62854;Q5JNZ5	P62854;Q5JNZ5			-0.161101	1.12804	0.0280641	-1.03466	0.467431	-0.427779	-0.546534	NaN	0.24266	2	2	2	20.9	20.9	20.9	13.015	0	19.705	8463900000	89
RPS27	40S ribosomal protein S27	P42677	P42677			0.361878	0.399597	0.077391	0.123762	-0.682234	-0.280395	0.182858	-0.167053	-0.293213	5	5	3	40.5	40.5	15.5	9.461	0	47.047	4093600000	82
RPS28	40S ribosomal protein S28	P62857	P62857			NaN	0.264964	NaN	-0.21004	-0.139321	0.0843973	-0.0260363	0.0470552	NaN	2	2	2	30.4	30.4	30.4	7.8409	0	16.368	471610000	18
RPS3	40S ribosomal protein S3	P23396;P23396-2	P23396;P23396-2			0.3562	0.246545	-0.817315	0.19707	0.0131766	0.00432459	0.535155	0.539925	-1.19441	14	14	14	67.1	67.1	67.1	26.688	0	139.43	18816000000	278
RPS3A	40S ribosomal protein S3a	P61247	P61247			0.343308	-0.0117699	0.217406	0.296456	-0.539455	-0.305944	0.080294	0.265494	0.35887	11	11	11	42.4	42.4	42.4	29.945	0	82.65	11403000000	206
RPS4X	40S ribosomal protein S4, X isoform	P62701;Q8TD47;P22090	P62701			-0.297021	-0.174571	-0.176322	0.410373	0.271791	-0.0342509	-0.436347	-0.45564	0.0761999	15	15	15	52.9	52.9	52.9	29.597	0	149.66	21854000000	288
RPS5	40S ribosomal protein S5;40S ribosomal protein S5, N-terminally processed	P46782	P46782			0.0285301	-0.184227	0.521338	-0.14452	-0.0947399	-0.126381	-0.0124664	0.0874596	0.900112	9	9	9	44.1	44.1	44.1	22.876	0	92.564	3190200000	77
RPS6	40S ribosomal protein S6	P62753	P62753			-0.0801306	0.808709	-1.21799	0.158086	0.434352	-0.103024	0.0775404	-0.296033	-0.93501	12	12	12	41.4	41.4	41.4	28.68	0	181.96	38088000000	319
RPS6KA3	Ribosomal protein S6 kinase alpha-3	P51812;Q15418-4;Q15418;Q15418-2;Q15418-3;Q15349;Q15349-3;Q15349-2;Q9UK32-2;Q9UK32	P51812			NaN	0.172875	NaN	0.207032	0.205452	-0.585359	1.47772	0.345452	0.02595	35	35	34	54.7	54.7	53.6	83.735	0	323.31	22071000000	283
RPS8	40S ribosomal protein S8	P62241	P62241			-0.0970767	0.565588	-1.13599	0.409851	0.318672	-0.0610469	-0.0052894	-0.430334	-1.93779	12	12	12	52.4	52.4	52.4	24.205	0	310.05	38039000000	408
RPS9	40S ribosomal protein S9	P46781	P46781			0.359894	0.539261	-0.8442	-0.0541382	-0.0912743	0.0904579	0.074894	0.0801163	-2.5514	16	16	16	58.2	58.2	58.2	22.591	0	135.25	716840000000	348
RPSA	40S ribosomal protein SA	P08865	P08865			-0.114152	0.314885	0.699151	-0.433175	-0.188922	-0.277787	0.584357	0.596833	-0.359897	8	8	8	28.8	28.8	28.8	32.854	0	96.971	3161400000	105
RRBP1	Ribosome-binding protein 1	Q9P2E9-3;Q9P2E9;Q8N4C6-6;Q8N4C6-11;Q8N4C6-4;Q8N4C6-9;Q8N4C6-2;Q8N4C6;Q8N4C6-5;Q8N4C6-10;Q8N4C6-7	Q9P2E9-3;Q9P2E9			0.049085	-0.570967	0.0514406	0.620164	0.536626	-0.686349	-0.442753	-0.200114	0.284307	11	11	11	12	12	12	108.63	0	76.645	1245700000	51
RRM1	Ribonucleoside-diphosphate reductase large subunit	P23921	P23921			0.288766	-0.105625	0.172953	0.0628764	-0.227693	-0.191278	0.0139548	0.0936171	-0.399679	13	13	13	22.2	22.2	22.2	90.069	0	131.79	3495700000	115
RSRC2	Arginine/serine-rich coiled-coil protein 2	Q7L4I2-2;Q7L4I2	Q7L4I2-2;Q7L4I2			0.411746	-0.428766	0.0170199	NaN	NaN	NaN	-0.24415	-0.463643	NaN	2	2	2	5.7	5.7	5.7	44.878	0	19.122	229420000	16
RTCB	tRNA-splicing ligase RtcB homolog	Q9Y3I0	Q9Y3I0			0.555919	0.457044	-0.840279	0.0991952	-0.285645	0.013765	0.495639	0.157324	NaN	10	10	10	20.2	20.2	20.2	55.21	0	98.502	2649800000	104
RTN4	Reticulon-4	Q9NQC3-2;Q9NQC3-5;Q9NQC3;Q9NQC3-3;Q9NQC3-4;Q9NQC3-6	Q9NQC3-2;Q9NQC3-5;Q9NQC3			NaN	NaN	NaN	NaN	-0.166858	0.166858	1.03836	1.70155	NaN	6	6	6	34.3	34.3	34.3	40.317	0	87.855	3307900000	60
RUVBL1	RuvB-like 1	Q9Y265;Q9Y265-2	Q9Y265;Q9Y265-2			0.125476	0.384845	0.121631	-0.436009	-0.223475	0.0275319	-0.187127	0.455798	0.647409	11	11	11	33.1	33.1	33.1	50.227	0	127.32	2461200000	65
RUVBL2	RuvB-like 2	Q9Y230;Q9Y230-2	Q9Y230;Q9Y230-2			0.5172	0.426635	-0.640015	-0.341012	-0.233863	0.271055	0.581436	0.567249	-0.581505	17	17	17	38.4	38.4	38.4	51.156	0	167.42	4752900000	156
S100A11	Protein S100-A11;Protein S100-A11, N-terminally processed	P31949	P31949			0.253184	-0.0437809	NaN	-0.0301052	-0.014856	-0.164442	0.319071	1.06418	0.568304	3	3	3	23.8	23.8	23.8	11.74	0	18.064	720110000	14
SAE1	SUMO-activating enzyme subunit 1;SUMO-activating enzyme subunit 1, N-terminally processed	Q9UBE0;Q9UBE0-2;Q9UBE0-3	Q9UBE0;Q9UBE0-2;Q9UBE0-3			0.084342	0.0270033	-0.403291	0.0229864	0.358737	-0.0897779	0.663388	1.03177	0.939158	13	13	13	42.5	42.5	42.5	38.449	0	96.19	3188200000	69
SAMHD1	Deoxynucleoside triphosphate triphosphohydrolase SAMHD1	Q9Y3Z3-3;Q9Y3Z3-4;Q9Y3Z3	Q9Y3Z3-3;Q9Y3Z3-4;Q9Y3Z3			0.270279	-0.164478	NaN	0.150118	-0.25592	NaN	0.11648	0.235682	-0.123796	3	3	3	5.8	5.8	5.8	63.675	0	18.992	221370000	11
SAMM50	Sorting and assembly machinery component 50 homolog	Q9Y512	Q9Y512			0.0580991	NaN	NaN	NaN	-0.156001	0.0979017	0.270555	0.0617059	NaN	3	3	3	5.8	5.8	5.8	51.976	0	17.118	483660000	6
SAR1A	GTP-binding protein SAR1a	Q9NR31;Q9NR31-2;Q9Y6B6	Q9NR31;Q9NR31-2			NaN	-0.516732	0.784873	-0.550063	0.316829	-0.0349056	-0.34819	-0.297776	NaN	3	3	3	23.2	23.2	23.2	22.367	0	26.379	647340000	26
SARNP	SAP domain-containing ribonucleoprotein	P82979	P82979			0.268784	0.18487	-0.0369221	0.490588	-0.678831	-0.228489	0.232405	0.173346	0.410738	6	6	6	29.5	29.5	29.5	23.671	0	41.636	811240000	42
SARS	Serine--tRNA ligase, cytoplasmic	P49591	P49591			-0.0780411	0.389635	NaN	-0.910376	0.472378	0.126404	-0.192741	0.0960274	NaN	8	8	8	17.9	17.9	17.9	58.777	0	55.539	1567000000	58
SARS2	Serine--tRNA ligase, mitochondrial	Q9NP81;Q9NP81-2	Q9NP81;Q9NP81-2			0.486526	0.136764	NaN	0.298656	-0.315661	-0.606284	0.375688	NaN	NaN	4	4	4	11.6	11.6	11.6	58.282	0	27.412	627170000	17
SART3	Squamous cell carcinoma antigen recognized by T-cells 3	Q15020-4;Q15020;Q15020-2;Q15020-3	Q15020-4;Q15020;Q15020-2			-0.112966	-0.324258	0.407609	0.0296159	NaN	NaN	-0.0915084	-0.0920463	0.446894	4	4	4	5.9	5.9	5.9	105.58	0	33.429	383810000	12
SBDS	Ribosome maturation protein SBDS	Q9Y3A5	Q9Y3A5			0.581658	0.309109	0.404993	-0.462164	-0.462354	-0.371242	0.561837	0.794154	1.12518	6	6	6	22	22	22	28.763	0	43.666	759690000	33
SCAF1	Splicing factor, arginine/serine-rich 19	Q9H7N4	Q9H7N4			NaN	-0.348426	NaN	0.579799	-0.117019	-0.114354	-0.412635	0.252501	NaN	4	4	4	3.7	3.7	3.7	139.27	0	27.99	421870000	26
SCAMP2	Secretory carrier-associated membrane protein 2	O15127	O15127			0.0248556	-0.0248556	NaN	NaN	NaN	NaN	0.540135	0.150887	NaN	2	2	2	7.6	7.6	7.6	36.648	0.00077942	16.098	341050000	23
SCFD1	Sec1 family domain-containing protein 1	Q8WVM8;Q8WVM8-2;Q8WVM8-3	Q8WVM8;Q8WVM8-2;Q8WVM8-3			NaN	0.189046	NaN	-0.986944	0.797898	NaN	NaN	NaN	NaN	4	4	4	7.2	7.2	7.2	72.379	0	32.58	317960000	15
SCP2	Non-specific lipid-transfer protein	P22307-6;P22307-2;P22307-4;P22307-7;P22307-8;P22307	P22307-6;P22307-2;P22307-4;P22307-7;P22307-8;P22307			0.0542164	0.594704	NaN	-0.415419	-0.202755	-0.0307465	0.302523	0.709661	NaN	4	4	4	28.6	28.6	28.6	15.079	0	27.871	811240000	27
SCRN1	Secernin-1	Q12765-3;Q12765;Q12765-2	Q12765-3;Q12765;Q12765-2			0.037158	-0.568213	0.334815	-0.0437117	0.5468	-0.306848	-0.484591	0.266938	0.437844	4	4	4	12.7	12.7	12.7	38.863	0	41.787	701720000	38
SDHA	Succinate dehydrogenase [ubiquinone] flavoprotein subunit, mitochondrial	P31040-2;P31040;P31040-3	P31040-2;P31040;P31040-3			0.0386012	-0.823044	0.346581	0.660801	-0.0781323	-0.144808	-0.595451	0.120928	0.765789	9	9	9	15.7	15.7	15.7	67.299	0	67.09	1782200000	67
SDHB	Succinate dehydrogenase [ubiquinone] iron-sulfur subunit, mitochondrial	P21912	P21912			NaN	NaN	NaN	NaN	0.097662	-0.097662	NaN	NaN	NaN	3	3	3	11.1	11.1	11.1	31.629	0	20.665	245400000	13
SEC13	Protein SEC13 homolog	P55735-2;P55735;P55735-4;P55735-3	P55735-2;P55735;P55735-4;P55735-3			NaN	0	NaN	NaN	NaN	NaN	NaN	NaN	NaN	3	3	3	8.4	8.4	8.4	34.011	0	25.162	224850000	4
SEC22B	Vesicle-trafficking protein SEC22b	O75396	O75396			-0.466279	-0.222209	0.385612	0.943303	-0.601802	-0.0386248	0.351758	NaN	0.97672	2	2	2	9.3	9.3	9.3	24.593	0	40.9	535260000	39
SEC23A	Protein transport protein Sec23A	Q15436;Q15436-2	Q15436;Q15436-2			NaN	-0.173686	-0.351396	0.230841	0.0774143	0.216826	NaN	NaN	0.0628002	8	8	7	11.4	11.4	9.5	86.16	0	53.342	790400000	38
SEC24C	Protein transport protein Sec24C	P53992;P53992-2	P53992			0.212565	0.123471	0.413868	-0.756477	0.240176	-0.233602	0.00451692	-0.762109	0.846529	8	8	8	8.6	8.6	8.6	118.32	0	61.294	723480000	36
SEC31A	Protein transport protein Sec31A	O94979-7;O94979-6;O94979-3;O94979-10;O94979-4;O94979-9;O94979-2;O94979;O94979-8;O94979-5	O94979-7;O94979-6;O94979-3;O94979-10;O94979-4;O94979-9;O94979-2;O94979;O94979-8			NaN	NaN	NaN	0.056263	0.215937	-0.2722	NaN	NaN	-0.898743	6	6	6	6.7	6.7	6.7	105.75	0	34.84	593200000	19
SEC61A1;SEC61A2	Protein transport protein Sec61 subunit alpha isoform 1;Protein transport protein Sec61 subunit alpha isoform 2	P61619;P61619-3;Q9H9S3-2;Q9H9S3-3;Q9H9S3	P61619;P61619-3;Q9H9S3-2;Q9H9S3-3;Q9H9S3			-0.131628	-0.371819	0.123354	0.685089	-0.156584	-0.148411	-0.0314945	0.0221917	0.780344	6	6	6	12	12	12	52.264	0	41.221	899930000	38
SEC61B	Protein transport protein Sec61 subunit beta	P60468	P60468			0.391183	-0.785898	-0.374624	0.590312	0.316664	-0.137637	0.0987918	0.237958	0.546029	3	3	3	37.5	37.5	37.5	9.9743	0	44.509	1748500000	59
SEPT11	Septin-11	Q9NVA2;Q9NVA2-2	Q9NVA2;Q9NVA2-2			0.416243	0.0354202	NaN	0.232663	-0.466441	-0.217885	0.206914	0.390252	-1.94654	10	10	6	28.4	28.4	17.7	49.398	0	168.94	2845900000	75
SEPT2	Septin-2	Q15019;Q15019-3;Q15019-2	Q15019;Q15019-3;Q15019-2			0.29365	-0.22578	NaN	0.321829	-0.410315	0.0206165	0.137863	-0.0975952	-1.66546	5	5	5	17.2	17.2	17.2	41.487	0	38.78	1049000000	29
SEPT7	Septin-7	Q16181-2;Q16181;Q6ZU15	Q16181-2;Q16181			0.164107	0.0657069	-0.198211	0.0870997	-0.337293	0.21859	0.259598	0.121073	0.399956	9	9	9	21.8	21.8	21.8	50.58	0	97.149	3408600000	122
SEPT9	Septin-9	Q9UHD8-7;Q9UHD8-2;Q9UHD8-5;Q9UHD8;Q9UHD8-3;Q9UHD8-4;Q9UHD8-9;Q9UHD8-8	Q9UHD8-7;Q9UHD8-2;Q9UHD8-5;Q9UHD8;Q9UHD8-3;Q9UHD8-4;Q9UHD8-9;Q9UHD8-8			0.578613	-0.084486	NaN	0.218756	-0.394205	-0.318678	0.445484	0.755501	-0.0462875	10	10	10	19.6	19.6	19.6	63.502	0	70.503	1818300000	55
SERBP1	Plasminogen activator inhibitor 1 RNA-binding protein	Q8NC51-4;Q8NC51-3;Q8NC51-2;Q8NC51	Q8NC51-4;Q8NC51-3;Q8NC51-2;Q8NC51			-0.911138	-0.642185	0.0588001	0.666956	1.11626	-0.288692	-0.774624	-1.09463	0.381409	15	15	15	48.3	48.3	48.3	42.426	0	253.57	9807600000	195
SERPINB6	Serpin B6	P35237;P50452-2;P50452	P35237			-0.357135	0.106469	NaN	0.438893	-0.319244	0.131017	0.185605	-0.0756371	NaN	7	7	7	18.9	18.9	18.9	42.621	0	48.649	994470000	14
SERPINH1	Serpin H1	P50454	P50454			-0.188855	0.130326	-0.212711	0.0555464	0.100341	0.115353	0.0364749	0.450902	NaN	12	12	12	38.8	38.8	38.8	46.44	0	145.22	4029600000	96
SET;SETSIP	Protein SET;Protein SETSIP	Q01105-3;Q01105-4;Q01105-2;Q01105;P0DME0	Q01105-3;Q01105-4;Q01105-2;Q01105;P0DME0			0.0745457	0.231025	NaN	0.236615	0.11995	-0.662135	0.0964325	0.374261	NaN	3	3	3	12.8	12.8	12.8	30.992	0	31.611	753170000	25
SF1	Splicing factor 1	Q15637-4;Q15637-6;Q15637-3;Q15637-2;Q15637;Q15637-5;Q15637-7	Q15637-4;Q15637-6;Q15637-3;Q15637-2;Q15637;Q15637-5;Q15637-7			NaN	-0.291269	NaN	-0.443863	0.689869	0.0452633	NaN	NaN	NaN	8	8	8	19.5	19.5	19.5	59.711	0	74.959	627740000	35
SF3A1	Splicing factor 3A subunit 1	Q15459;Q15459-2	Q15459;Q15459-2			NaN	NaN	NaN	NaN	0.229688	-0.229688	NaN	NaN	NaN	3	3	3	3.4	3.4	3.4	88.885	0	21.125	279980000	5
SF3A3	Splicing factor 3A subunit 3	Q12874	Q12874			0.217654	0.498117	NaN	-0.422377	-0.0398548	-0.253539	0.577729	0.429855	NaN	5	5	5	12.2	12.2	12.2	58.848	0	45.575	887550000	37
SF3B1	Splicing factor 3B subunit 1	O75533;O75533-2	O75533			0.134144	-0.280304	0.491028	-0.146898	0.058054	-0.256023	-0.0135136	0.159388	0.818184	15	15	15	14.1	14.1	14.1	145.83	0	121.77	2036900000	107
SF3B2	Splicing factor 3B subunit 2	Q13435	Q13435			-0.0153653	-0.132782	0.207583	0.713091	-0.313459	-0.459068	0.106739	-0.236623	0.300635	13	13	13	16.6	16.6	16.6	100.23	0	89.108	2728700000	74
SF3B3	Splicing factor 3B subunit 3	Q15393;Q15393-2;Q15393-3	Q15393			0.0604693	-0.11111	0.654994	-0.320602	-0.350932	0.0671813	-0.15948	-0.0559171	0.125794	19	19	19	18.7	18.7	18.7	135.58	0	141.98	3716400000	108
SFPQ	Splicing factor, proline- and glutamine-rich	P23246;P23246-2	P23246;P23246-2			0.225327	-0.291046	0.412944	0.161071	-0.127979	-0.380317	0.366208	0.110146	-0.130189	13	13	12	20.2	20.2	19.1	76.149	0	115.3	3411000000	98
SFT2D3	Vesicle transport protein SFT2C	Q587I9	Q587I9			0.797527	-0.20617	NaN	NaN	-0.591357	NaN	NaN	NaN	NaN	2	2	2	11.6	11.6	11.6	21.789	0.00074906	14.378	171480000	7
SFXN1	Sideroflexin-1	Q9H9B4	Q9H9B4			0.0983381	-0.170634	-0.140296	0.212592	NaN	NaN	0.0892115	0.118293	NaN	4	4	4	15.2	15.2	15.2	35.619	0	51.701	742940000	22
SHMT2	Serine hydroxymethyltransferase, mitochondrial	P34897-3;P34897;P34897-2	P34897-3;P34897;P34897-2			0.353002	-0.0257228	-0.0352386	-0.115002	-0.162018	-0.0150207	0.165374	0.132957	0.268678	18	18	17	38.9	38.9	36	53.454	0	163.36	10771000000	270
SKIV2L2	Superkiller viralicidic activity 2-like 2	P42285	P42285			NaN	NaN	NaN	-0.482566	0.352235	0.13033	NaN	NaN	NaN	4	4	4	4.1	4.1	4.1	117.8	0	25.241	293540000	9
SKP1	S-phase kinase-associated protein 1	P63208;P63208-2	P63208;P63208-2			NaN	0.0173982	NaN	NaN	-0.0674044	0.0500062	NaN	NaN	NaN	2	2	2	24.5	24.5	24.5	18.658	0	37.966	366030000	25
SLC1A5	Neutral amino acid transporter B(0)	Q15758;Q15758-3;Q15758-2	Q15758;Q15758-3;Q15758-2			-0.292004	-0.18085	0.594959	-0.793988	0.844281	-0.172398	0.182378	0.165624	1.33956	6	6	6	13.9	13.9	13.9	56.598	0	62.137	1505300000	84
SLC25A1	Tricarboxylate transport protein, mitochondrial	P53007	P53007			0.26682	-0.275336	NaN	0.473445	-0.240125	-0.224803	0.292191	0.321173	0.730786	4	4	4	13.8	13.8	13.8	34.012	0	33.058	1219600000	31
SLC25A11	Mitochondrial 2-oxoglutarate/malate carrier protein	Q02978;Q02978-2	Q02978;Q02978-2			0.397472	-0.203057	0.0271009	-0.19924	-0.028443	0.00616773	0.0159772	0.195457	-0.433486	7	7	7	24.5	24.5	24.5	34.061	0	79.964	1265800000	50
SLC25A13	Calcium-binding mitochondrial carrier protein Aralar2	Q9UJS0;Q9UJS0-2;O75746-2;O75746	Q9UJS0;Q9UJS0-2			NaN	NaN	NaN	-0.843307	0.688538	0.154769	NaN	NaN	NaN	8	8	8	14.8	14.8	14.8	74.175	0	45.155	455830000	17
SLC25A3	Phosphate carrier protein, mitochondrial	Q00325-2;Q00325	Q00325-2;Q00325			0.485221	-0.021012	-0.667227	0.593604	-0.352063	-0.0385234	0.686023	0.682054	-0.456696	9	9	9	25.5	25.5	25.5	39.958	0	68.697	3954600000	97
SLC25A5	ADP/ATP translocase 2;ADP/ATP translocase 2, N-terminally processed	P05141;Q9H0C2	P05141			-0.196254	0.0697066	-0.365342	0.352004	0.105059	0.0348269	0.152938	0.112292	-0.136508	12	12	4	35.2	35.2	14.4	32.852	0	92.91	18776000000	237
SLC25A6	ADP/ATP translocase 3;ADP/ATP translocase 3, N-terminally processed	P12236	P12236			-0.00634689	0.408532	NaN	-0.679612	0.403163	-0.125735	-0.0209286	-1.11372	NaN	11	3	2	34.9	11.1	7.4	32.866	0	25.283	3012200000	64
SLC3A2	4F2 cell-surface antigen heavy chain	P08195-2;P08195-3;P08195;P08195-4	P08195-2;P08195-3;P08195;P08195-4			0.128648	0.291856	NaN	-0.596547	0.384652	-0.208609	0.00680466	0.669503	NaN	6	6	6	12.9	12.9	12.9	57.944	0	47.843	858340000	54
SLC7A5	Large neutral amino acids transporter small subunit 1	Q01650	Q01650			0.265705	NaN	NaN	NaN	-0.265705	NaN	NaN	0.0540695	NaN	2	2	2	6.3	6.3	6.3	55.01	0	18.477	231360000	13
SLC9A3R1	Na(+)/H(+) exchange regulatory cofactor NHE-RF1	O14745;O14745-2	O14745;O14745-2			0.0682418	-0.0111707	NaN	NaN	-0.057071	NaN	NaN	0.147462	NaN	4	4	4	12.8	12.8	12.8	38.868	0	26.14	161400000	7
SLFN11	Schlafen family member 11	Q7Z7L1;Q08AF3	Q7Z7L1			0.265483	-0.289363	0.235923	-0.0404275	-0.11243	-0.0591844	0.262316	0.0641028	0.184039	4	4	4	3.9	3.9	3.9	102.83	0	23.566	464390000	16
SLIRP	SRA stem-loop-interacting RNA-binding protein, mitochondrial	Q9GZT3-2;Q9GZT3	Q9GZT3-2;Q9GZT3			NaN	NaN	NaN	0.121713	NaN	-0.121713	NaN	0.0316381	NaN	3	3	3	32.7	32.7	32.7	12.122	0	22.081	787800000	10
SMARCA5	SWI/SNF-related matrix-associated actin-dependent regulator of chromatin subfamily A member 5	O60264;P28370-2;P28370	O60264			0.0870934	-0.21908	NaN	0.45878	-0.326794	NaN	0.269606	0.386856	NaN	3	3	3	3	3	3	121.9	0	20.112	144680000	7
SMARCC2	SWI/SNF complex subunit SMARCC2	Q8TAQ2-2;Q8TAQ2-3;Q8TAQ2	Q8TAQ2-2;Q8TAQ2-3;Q8TAQ2			NaN	0	NaN	NaN	NaN	NaN	NaN	NaN	NaN	5	5	5	4.9	4.9	4.9	124.84	0	30.623	267500000	13
SMC1A	Structural maintenance of chromosomes protein 1A	Q14683	Q14683			0.148854	-0.457803	0.180659	0.598084	-0.339433	-0.130359	0.108147	-0.207546	0.471102	10	10	10	9.2	9.2	9.2	143.23	0	75.572	1379300000	60
SMC2	Structural maintenance of chromosomes protein 2	O95347;O95347-2	O95347;O95347-2			0.237094	-0.225841	0.201423	0.00339413	-0.26603	0.0499601	0.0983973	0.451726	0.0821848	10	10	10	8.2	8.2	8.2	135.65	0	61.708	796830000	22
SMC3	Structural maintenance of chromosomes protein 3	Q9UQE7	Q9UQE7			0.0917854	-0.45603	0.357733	0.559669	-0.330847	-0.222311	-0.0604706	-0.432848	1.1591	14	14	14	13.1	13.1	13.1	141.54	0	97.747	1118700000	37
SMC4	Structural maintenance of chromosomes protein 4	Q9NTJ3;Q9NTJ3-2	Q9NTJ3;Q9NTJ3-2			0.266528	-0.409672	0.225322	0.188554	0.170913	-0.441645	-0.384522	0.21362	0.100206	12	12	12	9.5	9.5	9.5	147.18	0	83.577	1602500000	56
SND1	Staphylococcal nuclease domain-containing protein 1	Q7KZF4	Q7KZF4			0.467765	0.423961	-1.05133	0.123685	-0.0520163	0.0879354	0.528718	0.355721	-0.283952	24	24	24	33.7	33.7	33.7	102	0	237.27	6387700000	219
SNRNP200	U5 small nuclear ribonucleoprotein 200 kDa helicase	O75643;O75643-2	O75643			0.133353	-0.429204	0.719973	-0.126947	-0.45477	0.157595	-0.698707	-0.924827	0.226805	21	21	21	10	10	10	244.5	0	135.61	2875400000	60
SNRNP70	U1 small nuclear ribonucleoprotein 70 kDa	P08621;P08621-2;P08621-3;P08621-4	P08621;P08621-2;P08621-3			-0.00511646	-0.223533	0.338006	0.355849	-0.406051	-0.0591555	0.332335	0.52027	-0.0494852	17	17	17	41.6	41.6	41.6	51.556	0	201.09	7544700000	225
SNRPB;SNRPN	Small nuclear ribonucleoprotein-associated proteins B and B;Small nuclear ribonucleoprotein-associated protein N	P14678-2;P63162;P14678;P63162-2;P14678-3	P14678-2;P63162;P14678;P63162-2;P14678-3			-0.00515518	-0.188665	NaN	-0.132232	0.182169	0.143883	0.0578293	0.176712	NaN	3	3	3	10	10	10	23.656	0	18.193	516710000	12
SNRPD2	Small nuclear ribonucleoprotein Sm D2	P62316;P62316-2	P62316			0.160635	0.00907167	0.721806	0.0641464	-0.555723	-0.399936	0.0994132	0.482403	1.11197	3	3	3	22	22	22	13.527	0	22.572	1593500000	45
SNX6	Sorting nexin-6;Sorting nexin-6, N-terminally processed	Q9UNH7;Q9UNH7-2	Q9UNH7;Q9UNH7-2			0.458836	-0.103952	0.0365963	0.297857	-0.49024	-0.199097	0.488146	0.125893	NaN	4	4	3	9.9	9.9	7.4	46.648	0	27.027	443780000	18
SOAT1	Sterol O-acyltransferase 1	P35610	P35610			0.20746	-0.524996	0.183464	-0.124623	0.738922	-0.480227	0.101795	0.245624	0.392381	2	2	2	4.7	4.7	4.7	64.734	0	16.942	365030000	24
SOD2	Superoxide dismutase [Mn], mitochondrial	P04179-4;P04179-2;P04179;P04179-3	P04179-4;P04179-2;P04179;P04179-3			0.157862	0.0193405	-0.612679	0.568989	0.0198746	-0.153387	-0.499277	0.0783138	-0.651098	4	4	4	21	21	21	19.73	0	23.891	515020000	24
SON	Protein SON	P18583-10;P18583-3;P18583-4;P18583-7;P18583;P18583-5;P18583-9;P18583-6;P18583-2;P18583-8	P18583-10;P18583-3;P18583-4;P18583-7;P18583;P18583-5;P18583-9;P18583-6;P18583-2			-0.0526733	0.0505505	NaN	NaN	NaN	0.00212288	-0.139124	0.0379047	0.195099	6	6	6	3.6	3.6	3.6	247.82	0	36.595	355200000	15
SPAG9	C-Jun-amino-terminal kinase-interacting protein 4	O60271-4;O60271-2;O60271;O60271-5;O60271-3;O60271-9;Q9UPT6;Q9UPT6-2	O60271-4;O60271-2;O60271;O60271-5;O60271-3;O60271-9			0.326838	-0.413712	0.104326	-0.155636	0.27969	-0.141506	0.0339203	0.356251	0.248159	11	11	11	11.2	11.2	11.2	144.68	0	82.859	1049600000	19
SPTAN1	Spectrin alpha chain, non-erythrocytic 1	Q13813-3;Q13813;Q13813-2	Q13813-3;Q13813;Q13813-2			0.564545	-0.180717	0.0584911	-0.638881	0.227438	-0.0308758	-0.242553	-0.385849	0.283867	23	23	23	10.7	10.7	10.7	282.28	0	146.58	1519700000	42
SPTBN1	Spectrin beta chain, non-erythrocytic 1	Q01082-3;Q01082-2;Q01082	Q01082-3;Q01082-2;Q01082			0.00667985	-0.436912	0.226353	0.0346511	0.418209	-0.248981	-0.0255982	-0.542808	0.123514	8	8	8	4.3	4.3	4.3	251.39	0	53.574	680250000	26
SRI	Sorcin	P30626-3;P30626-2;P30626	P30626-3;P30626-2;P30626			0.0814021	-0.116789	0.220583	0.49238	-0.462371	-0.215206	0.242468	0.478554	0.601748	2	2	2	10	10	10	20.006	0.00074683	14.299	475640000	22
SRM	Spermidine synthase	P19623	P19623			0.253985	0.17339	NaN	-0.588394	-0.0305763	0.191595	0.289048	-0.102623	1.37025	7	7	7	25.5	25.5	25.5	33.824	0	51.806	1463800000	63
SRP14	Signal recognition particle 14 kDa protein	P37108	P37108			NaN	0.0476489	NaN	-0.650404	0.54779	0.0549655	-0.140212	NaN	NaN	5	5	5	40.4	40.4	40.4	14.57	0	47.012	735620000	19
SRP54	Signal recognition particle 54 kDa protein	P61011;P61011-2	P61011;P61011-2			NaN	-0.920903	0.194709	0.00820694	0.733472	-0.0154861	NaN	0.219692	NaN	9	9	9	24.6	24.6	24.6	55.704	0	66.236	716580000	33
SRP68	Signal recognition particle subunit SRP68	Q9UHB9-4;Q9UHB9;Q9UHB9-2;Q9UHB9-3	Q9UHB9-4;Q9UHB9;Q9UHB9-2			0.23837	-0.314038	-0.23745	0.432708	-0.000286738	-0.119303	-0.207417	0.664794	0.194497	9	9	9	19	19	19	66.107	0	70.621	1591100000	44
SRP72	Signal recognition particle subunit SRP72	O76094;O76094-2	O76094;O76094-2			0.442838	-0.414166	0.63001	0.184755	-0.412833	-0.430604	-0.479438	0.271812	0.956868	7	7	7	11	11	11	74.605	0	48.184	840460000	20
SRPK1	SRSF protein kinase 1	Q96SB4-4;Q96SB4;Q96SB4-3	Q96SB4-4;Q96SB4;Q96SB4-3			-0.100718	NaN	0.100718	NaN	NaN	NaN	0.0768843	NaN	NaN	3	3	2	5.2	5.2	3.8	72.383	0	21.259	252950000	12
SRPR	Signal recognition particle receptor subunit alpha	P08240;P08240-2	P08240;P08240-2			-0.506617	-0.66635	-0.0576214	0.994178	NaN	0.23641	-0.654681	-0.195767	0.236736	11	11	11	21.9	21.9	21.9	69.81	0	74.84	1142700000	27
SRRM1	Serine/arginine repetitive matrix protein 1	Q8IYB3;Q8IYB3-2	Q8IYB3;Q8IYB3-2			0.337787	-0.569989	0.530481	0.331991	-0.233424	-0.396845	-0.00859324	0.189931	0.527814	12	12	12	19.8	19.8	19.8	102.33	0	176.85	3867100000	101
SRRM2	Serine/arginine repetitive matrix protein 2	Q9UQ35;Q9UQ35-2;Q9UQ35-3	Q9UQ35;Q9UQ35-2			0.113924	-0.194441	-0.175047	0.185285	-0.170826	0.241106	-0.424134	-0.330141	-0.354235	88	88	88	38.9	38.9	38.9	299.61	0	323.31	108030000000	1794
SRRT	Serrate RNA effector molecule homolog	Q9BXP5-5;Q9BXP5-4;Q9BXP5-2;Q9BXP5-3;Q9BXP5	Q9BXP5-5;Q9BXP5-4;Q9BXP5-2;Q9BXP5-3;Q9BXP5			0.110008	-0.595551	0.969969	-0.497541	NaN	0.0131149	-0.218151	0.233559	0.802456	8	8	8	9.5	9.5	9.5	96.221	0	62.692	733880000	36
SRSF1	Serine/arginine-rich splicing factor 1	Q07955;Q07955-3;Q07955-2	Q07955;Q07955-3;Q07955-2			0.329237	-0.328275	0.117527	0.133231	-0.0544526	-0.197267	0.183291	0.446833	0.0740703	11	11	11	39.5	39.5	39.5	27.744	0	94.052	3517700000	131
SRSF11	Serine/arginine-rich splicing factor 11	Q05519-2;Q05519	Q05519-2;Q05519			0.108199	0.507697	NaN	-1.54426	0.463231	0.465136	-0.577895	0.826081	NaN	9	9	9	31.7	31.7	31.7	53.413	0	78.147	2367900000	76
SRSF2;SRSF8	Serine/arginine-rich splicing factor 2;Serine/arginine-rich splicing factor 8	Q01130-2;Q01130;Q9BRL6-2;Q9BRL6	Q01130-2;Q01130;Q9BRL6-2;Q9BRL6			NaN	-0.146158	NaN	-0.470039	0.122359	0.493838	0.359021	0.190648	NaN	4	4	4	23	23	23	24.153	0	63.594	2383400000	44
SRSF3	Serine/arginine-rich splicing factor 3	P84103-2;P84103	P84103-2;P84103			-0.185482	-0.143925	NaN	0.178329	0.25371	-0.102633	0.241913	0.185366	-0.0117245	5	4	4	42.7	31.5	31.5	14.203	0	42.899	1830000000	54
SRSF5	Serine/arginine-rich splicing factor 5	Q13243-3;Q13243;Q13243-2	Q13243-3;Q13243			0.301907	-0.0630913	NaN	-0.16647	-0.0671921	-0.00515366	0.233875	0.497601	NaN	4	3	3	15.6	12.3	12.3	30.858	0	22.283	497440000	13
SRSF6	Serine/arginine-rich splicing factor 6	Q13247-3;Q13247;Q13247-2	Q13247-3;Q13247			0.386951	-0.0962029	0.00236511	0.17655	-0.519857	0.0501938	0.37611	0.614872	-0.664299	12	12	9	29	29	22.7	38.418	0	129.94	8722400000	189
SRSF7	Serine/arginine-rich splicing factor 7	Q16629-4;Q16629;Q16629-3;Q16629-2	Q16629-4;Q16629;Q16629-3;Q16629-2			-0.285057	-0.423466	0.143023	0.133917	0.399607	0.0319767	-0.369667	0.143869	0.832668	8	8	7	31.4	31.4	31.4	26.012	0	72.372	3340400000	76
SSB	Lupus La protein	P05455	P05455			0.0912043	-0.0813287	0.142546	0.125605	0.237872	-0.515899	-0.148218	-0.148008	0.458033	14	14	14	35.3	35.3	35.3	46.836	0	121.55	4241400000	167
SSRP1	FACT complex subunit SSRP1	Q08945	Q08945			0.360242	0.241702	0.660911	-1.23981	0.0999022	-0.122951	0.0864058	0.149531	0.818471	10	10	10	16.8	16.8	16.8	81.074	0	100.88	2043900000	83
ST13;ST13P5;ST13P4	Hsc70-interacting protein;Putative protein FAM10A5;Putative protein FAM10A4	P50502;Q8NFI4;Q8IZP2	P50502;Q8NFI4;Q8IZP2			-0.00326633	0.554561	0.0481253	-0.126319	-0.177686	-0.295415	0.0979147	0.156476	-1.07462	7	7	7	19.5	19.5	19.5	41.331	0	70.559	7026600000	150
STAT1	Signal transducer and activator of transcription 1-alpha/beta	P42224;P42224-2	P42224;P42224-2			0.0260006	0.122581	NaN	0.209676	0.0294453	-0.387703	0.371669	0.223129	NaN	9	9	9	14.1	14.1	14.1	87.334	0	77.843	948450000	26
STAT3	Signal transducer and activator of transcription 3	P40763-3;P40763-2;P40763	P40763-3;P40763-2;P40763			NaN	NaN	NaN	0.291177	NaN	-0.291177	0.0286436	NaN	NaN	5	5	5	10	10	10	83.125	0	38.843	384880000	17
STIP1	Stress-induced-phosphoprotein 1	P31948;P31948-2;P31948-3	P31948;P31948-2;P31948-3			0.131438	-0.0604512	-0.357063	0.402714	0.218188	-0.334825	0.0380939	-0.024944	-0.285501	26	26	26	41.6	41.6	41.6	62.639	0	215.64	14834000000	328
STOML2	Stomatin-like protein 2, mitochondrial	Q9UJZ1;Q9UJZ1-2	Q9UJZ1;Q9UJZ1-2			-0.237901	0.0604521	-0.149106	0.575871	-0.0688585	-0.180457	0.359088	0.429158	1.2172	7	7	7	25.3	25.3	25.3	38.534	0	63.382	597630000	28
STRAP	Serine-threonine kinase receptor-associated protein	Q9Y3F4;Q9Y3F4-2	Q9Y3F4;Q9Y3F4-2			0.39054	0.252667	-0.386796	0.186543	-0.374738	-0.0682157	0.488227	0.345307	-1.08654	10	10	10	36.6	36.6	36.6	38.438	0	110.24	4124000000	138
STT3A	Dolichyl-diphosphooligosaccharide--protein glycosyltransferase subunit STT3A	P46977-2;P46977	P46977-2;P46977			-0.114129	-0.101805	0.470672	0.0430406	-0.21115	-0.0866286	0.484153	0.526729	1.02463	7	7	7	10.8	10.8	10.8	69.588	0	72.528	1820100000	65
STX12	Syntaxin-12	Q86Y82	Q86Y82			NaN	NaN	NaN	-0.357584	0.357584	NaN	-0.0866222	0.105461	NaN	4	4	4	18.5	18.5	18.5	31.642	0	31.417	485350000	6
SUCLA2	Succinyl-CoA ligase [ADP-forming] subunit beta, mitochondrial	Q9P2R7-2;Q9P2R7	Q9P2R7-2;Q9P2R7			0.571802	-0.166103	0.286921	0.18585	-0.575624	-0.302845	-0.0383663	0.0679417	0.736626	2	2	2	4.3	4.3	4.3	48.039	0.0007657	15.135	275230000	13
SUMO1	Small ubiquitin-related modifier 1;Small ubiquitin-related modifier	P63165;G2XKQ0;P63165-2	P63165;G2XKQ0			-0.0578728	NaN	NaN	0.344503	NaN	-0.286631	NaN	0.162329	NaN	3	3	3	34.7	34.7	34.7	11.557	0	22.152	507520000	12
SUPT16H	FACT complex subunit SPT16	Q9Y5B9	Q9Y5B9			0.249146	0.0837536	0.028595	-0.206915	-0.196913	0.0423336	0.224726	0.0472507	0.425993	20	20	20	20.9	20.9	20.9	119.91	0	178.53	4260400000	148
SURF4	Surfeit locus protein 4	O15260-2;O15260;O15260-3	O15260-2;O15260;O15260-3			NaN	NaN	NaN	NaN	0	NaN	-0.719223	NaN	NaN	2	2	2	17.6	17.6	17.6	17.97	0.00078247	16.173	344820000	11
SYNCRIP	Heterogeneous nuclear ribonucleoprotein Q	O60506-3;O60506-4;O60506;O60506-2;O60506-5	O60506-3;O60506-4;O60506;O60506-2;O60506-5			0.235774	0.0471355	NaN	-0.533715	0.203304	0.0475018	0.084964	-0.000288773	-0.827361	14	14	11	31.3	31.3	26.3	62.656	0	128.77	4202100000	111
SYNGR2	Synaptogyrin-2	O43760;O43760-2	O43760;O43760-2			0.713647	-0.0120361	NaN	0.0602371	-0.528548	-0.2333	-0.0824917	0.254695	NaN	2	2	2	8.9	8.9	8.9	24.81	0.00070028	12.709	366140000	15
TACC2	Transforming acidic coiled-coil-containing protein 2	O95359-3;O95359;O95359-6;O95359-1;O95359-5;O95359-2	O95359-3;O95359;O95359-6;O95359-1;O95359-5			0.593237	0.79455	-1.67164	0.336971	-0.162598	0.109482	-0.0552998	0.966541	NaN	3	3	3	1.3	1.3	1.3	301.05	0	16.716	32028000000	16
TAGLN2	Transgelin-2	P37802;P37802-2;Q9UI15	P37802;P37802-2			-0.132322	0.105973	0.238709	-0.262916	-0.0223554	0.0729109	-0.143831	0.25787	0.286708	12	12	12	64.8	64.8	64.8	22.391	0	205.06	19820000000	395
TALDO1	Transaldolase	P37837	P37837			0.155416	0.265657	-0.18957	0.214219	-0.125104	-0.320618	0.010877	-0.0959555	0.0917657	11	11	11	33.8	33.8	33.8	37.54	0	90.58	3658500000	117
TARDBP	TAR DNA-binding protein 43	Q13148;Q13148-4	Q13148;Q13148-4			-0.458628	-0.213601	0.29387	0.0719808	0.430999	-0.124621	0.252132	0.350124	0.688693	6	6	6	15.2	15.2	15.2	44.739	0	76.377	1269600000	56
TARS	Threonine--tRNA ligase, cytoplasmic	P26639;P26639-2;A2RTX5-2;A2RTX5	P26639;P26639-2			0.110586	-0.0788387	0.161131	0.146902	-0.194496	-0.145283	0.08238	0.0423028	0.673481	22	22	22	32.4	32.4	32.4	83.434	0	216.08	9367400000	270
TBC1D15	TBC1 domain family member 15	Q8TC07-2;Q8TC07-3;Q8TC07	Q8TC07-2;Q8TC07-3;Q8TC07			0.137133	-0.0508741	NaN	NaN	NaN	-0.0862592	0.686787	-0.372037	NaN	4	4	4	5.6	5.6	5.6	77.394	0	25.154	271690000	12
TBCA	Tubulin-specific chaperone A	O75347;O75347-2	O75347;O75347-2			-0.541299	0.241763	0.222375	0.455415	-0.217198	-0.161056	-0.452693	-0.797919	0.158811	8	8	8	51.9	51.9	51.9	12.855	0	84.351	3055600000	84
TBCB	Tubulin-folding cofactor B	Q99426;Q99426-2	Q99426;Q99426-2			-0.0690832	-0.190948	0.334641	0.140189	-0.161363	-0.0534372	-0.103332	0.254573	-0.338254	9	9	9	44.3	44.3	44.3	27.325	0	85.539	3036900000	57
TBCD	Tubulin-specific chaperone D	Q9BTW9;Q9BTW9-4;Q9BTW9-5;Q9BTW9-3	Q9BTW9;Q9BTW9-4;Q9BTW9-5			0.522009	-0.356485	0.35881	-0.161863	-0.177652	-0.184818	0.258499	0.101547	NaN	8	8	8	8.2	8.2	8.2	132.6	0	57.386	866590000	23
TCEB1	Transcription elongation factor B polypeptide 1	Q15369-2;Q15369	Q15369-2;Q15369			NaN	NaN	-0.462003	NaN	NaN	0.462003	NaN	NaN	0.230247	2	2	2	22.9	22.9	22.9	10.832	0	17.624	560850000	19
TCEB2	Transcription elongation factor B polypeptide 2	Q15370;Q15370-2	Q15370;Q15370-2			0.18205	0.160993	0.169868	0.260703	-0.275548	-0.498065	-0.193404	0.0869703	-0.521317	5	5	5	40.7	40.7	40.7	13.133	0	40.293	1804700000	71
TCERG1	Transcription elongation regulator 1	O14776-2;O14776	O14776-2;O14776			0.143471	0.125285	NaN	-0.0026165	0.129853	-0.395992	0.400935	0.145209	0.105528	6	6	6	6	6	6	121.69	0	37.228	397450000	18
TCOF1	Treacle protein	Q13428-2;Q13428-8;Q13428;Q13428-3;Q13428-4;Q13428-6;Q13428-7;Q13428-5	Q13428-2;Q13428-8;Q13428;Q13428-3;Q13428-4;Q13428-6;Q13428-7			0.188926	-0.420602	0.140708	0.387943	-0.165261	-0.131715	-0.292086	-0.26739	-0.081803	15	15	15	14.5	14.5	14.5	144.31	0	145.91	2629600000	113
TCP1	T-complex protein 1 subunit alpha	P17987	P17987			0.411847	-0.167588	-0.539939	0.102544	0.113036	0.0800985	0.117902	0.162959	-0.193646	24	24	24	55.4	55.4	55.4	60.343	0	313.84	16076000000	347
TECR	Very-long-chain enoyl-CoA reductase	Q9NZ01	Q9NZ01			0.113079	-0.167027	NaN	NaN	-0.0742226	0.12817	0.29159	0.541481	-0.024601	3	3	3	9.1	9.1	9.1	36.034	0	18.375	833590000	13
TES	Testin	Q9UGI8-2;Q9UGI8	Q9UGI8-2;Q9UGI8			0.204079	-0.104115	0.103153	0.35088	-0.322771	-0.231226	0.229313	0.173046	0.602875	12	12	12	27.2	27.2	27.2	46.91	0	104.8	3054000000	121
TFRC	Transferrin receptor protein 1;Transferrin receptor protein 1, serum form	P02786	P02786			0.022075	0.0893815	0.199519	-0.357377	-0.00624911	0.0526498	0.457088	1.17582	0.714931	8	8	8	12.1	12.1	12.1	84.87	0	57.78	855620000	34
THOP1	Thimet oligopeptidase	P52888;P52888-2	P52888			-0.0790304	-0.359714	-0.285951	0.456195	0.152373	0.116128	0.0210864	-0.235156	0.0509383	5	5	5	8.3	8.3	8.3	78.839	0	42.854	519210000	19
THRAP3	Thyroid hormone receptor-associated protein 3	Q9Y2W1	Q9Y2W1			0.217059	-0.18024	0.52147	0.289056	-0.470773	-0.376573	0.451091	0.442473	1.46636	10	9	9	13.4	12.3	12.3	108.66	0	72.999	1096600000	66
TIAL1	Nucleolysin TIAR	Q01085;Q01085-2	Q01085;Q01085-2			0.270694	-0.0412474	0.183923	0.185353	-0.482284	-0.116439	0.335446	0.559819	NaN	3	3	1	8.3	8.3	2.9	41.59	0	23.394	445800000	20
TIMM50	Mitochondrial import inner membrane translocase subunit TIM50	Q3ZCQ8;Q3ZCQ8-2;Q3ZCQ8-3	Q3ZCQ8;Q3ZCQ8-2;Q3ZCQ8-3			-0.0946137	-0.391979	0.0935443	0.00540574	0.542923	-0.155281	-0.219997	0.236477	0.470845	9	9	9	32	32	32	39.646	0	104.36	2306000000	86
TJP2	Tight junction protein ZO-2	Q9UDY2-3;Q9UDY2;Q9UDY2-7;Q9UDY2-6	Q9UDY2-3;Q9UDY2;Q9UDY2-7;Q9UDY2-6			-0.191388	NaN	0.0384002	0.164594	-0.0116067	NaN	-0.472777	-0.0142694	NaN	2	2	2	2.5	2.5	2.5	131.37	0.00067843	12.064	100130000	4
TKT	Transketolase	P29401;P29401-2	P29401;P29401-2			-0.176788	-0.0648232	-0.278925	0.256088	0.214731	0.0497169	-0.279087	-0.37714	0.194473	18	18	18	36.3	36.3	36.3	67.877	0	184.77	13658000000	252
TLE3;TLE2;TLE4;TLE1	Transducin-like enhancer protein 3;Transducin-like enhancer protein 2;Transducin-like enhancer protein 4;Transducin-like enhancer protein 1	Q04726-2;Q04726-7;Q04726-3;Q04726-6;Q04726-5;Q04726-4;Q04726;Q04725-2;Q04727-2;Q04725;Q04727-4;Q04724;Q04727;Q04727-3	Q04726-2;Q04726-7;Q04726-3;Q04726-6;Q04726-5;Q04726-4;Q04726;Q04725-2;Q04727-2;Q04725;Q04727-4;Q04724;Q04727;Q04727-3			0.251374	-0.274261	NaN	-0.0877299	NaN	0.110617	0.0137296	-0.169822	NaN	4	4	4	5.7	5.7	5.7	82.221	0	29.56	383140000	20
TLN1	Talin-1	Q9Y490;Q9Y4G6	Q9Y490			0.17745	-0.161531	-0.178419	0.235224	0.226311	-0.299034	-0.12525	0.138443	0.349197	64	64	64	35.6	35.6	35.6	269.76	0	323.31	20625000000	586
TMEM205	Transmembrane protein 205	Q6UW68	Q6UW68			NaN	NaN	NaN	0.212317	NaN	-0.212317	NaN	-0.608462	NaN	2	2	2	13.8	13.8	13.8	21.198	0.00076805	15.258	350130000	12
TMEM263	Transmembrane protein 263	Q8WUH6	Q8WUH6			-0.662643	0.23407	0.232062	-0.233556	0.045235	0.384833	-0.107546	-0.102882	-1.57596	5	5	5	62.9	62.9	62.9	11.748	0	45.385	2890600000	65
TMEM33	Transmembrane protein 33	P57088	P57088			0.474348	-0.235121	NaN	-0.348986	NaN	0.10976	0.147146	0.324296	0.252809	2	2	2	7.7	7.7	7.7	27.978	0	21.293	380990000	27
TMPO	Lamina-associated polypeptide 2, isoform alpha;Thymopoietin;Thymopentin	P42166	P42166			0.238084	-0.390368	NaN	0.152284	NaN	NaN	-0.115376	0.365459	NaN	10	4	4	21.8	8.1	8.1	75.491	0	32.388	349620000	7
TMPO	Lamina-associated polypeptide 2, isoforms beta/gamma;Thymopoietin;Thymopentin	P42167;P42167-2;P42167-3	P42167;P42167-2;P42167-3			0.273408	0.0837008	0.261986	0.0384719	-0.549684	-0.107883	-0.0237726	0.304663	0.625437	12	12	6	32.8	32.8	11.9	50.67	0	131.47	2899000000	97
TMX1	Thioredoxin-related transmembrane protein 1	Q9H3N1	Q9H3N1			0.210757	-0.108108	0.109899	0.47251	-0.31639	-0.368669	0.265536	0.304214	NaN	4	4	4	14.6	14.6	14.6	31.791	0	30.286	695350000	29
TNPO1	Transportin-1	Q92973-2;Q92973;Q92973-3	Q92973-2;Q92973;Q92973-3			0.0642227	0.0384906	0.134222	-0.41609	0.427031	-0.247877	0.300913	0.250874	NaN	9	9	7	11.3	11.3	9.4	101.31	0	95.95	2245700000	88
TOMM40	Mitochondrial import receptor subunit TOM40 homolog	O96008;O96008-2	O96008;O96008-2			-0.466909	0.00248184	NaN	0.291525	0.134589	0.0383133	0.415062	0.11137	NaN	6	6	6	26	26	26	37.893	0	54.1	2417600000	81
TOMM70A	Mitochondrial import receptor subunit TOM70	O94826	O94826			NaN	0	NaN	NaN	NaN	NaN	NaN	NaN	NaN	4	4	4	7.4	7.4	7.4	67.454	0	26.216	575530000	5
TOP1;TOP1MT	DNA topoisomerase 1;DNA topoisomerase I, mitochondrial	P11387;Q969P6-2;Q969P6	P11387;Q969P6-2;Q969P6			0.412101	0.283889	0.163619	0.0843058	-0.180472	-0.763442	0.487557	0.434712	NaN	7	7	7	8.5	8.5	8.5	90.725	0	51.007	835360000	31
TOR1AIP1	Torsin-1A-interacting protein 1	Q5JTV8;Q5JTV8-3;Q5JTV8-2	Q5JTV8;Q5JTV8-3			0.128109	-0.102663	NaN	-0.0254459	NaN	NaN	0.110483	0.379086	0.370058	3	3	3	6	6	6	66.248	0	37.834	187340000	14
TPD52L2	Tumor protein D54	O43399-6;O43399-2;O43399-4;O43399;O43399-3;O43399-5;O43399-7	O43399-6;O43399-2;O43399-4;O43399;O43399-3;O43399-5;O43399-7			NaN	NaN	NaN	0.00601641	0.0537535	-0.0597699	NaN	NaN	NaN	3	3	3	21.5	21.5	21.5	17.473	0	21.04	135820000	9
TPI1	Triosephosphate isomerase	P60174-1;P60174;P60174-4	P60174-1;P60174;P60174-4			-0.592192	0.389994	-0.160406	-0.0708466	0.587503	-0.154053	-0.126551	-0.499317	0.288872	18	18	18	85.1	85.1	85.1	26.669	0	323.31	75113000000	543
TPM3	Tropomyosin alpha-3 chain	P06753-2;P06753-5;P06753-3;P06753-6;P06753-4;P06753-7	P06753-2;P06753-5;P06753-3;P06753-6;P06753-4			0.237497	0.489655	-0.578388	-0.121302	-0.146183	0.118721	-0.00422478	0.242111	-0.93923	12	12	8	44	44	27	29.032	0	116.77	3417200000	118
TPM4	Tropomyosin alpha-4 chain	P67936;P67936-2;P09493-2;P09493-5;P09493-9;P09493-8;P09493-7;P09493-6;P09493-4;P09493-3;P09493-10;P09493	P67936			0.390051	0.358579	0.181549	-0.268332	-0.436613	-0.225233	-0.0701736	0.322357	0.834146	7	6	6	27	23	23	28.521	0	63.943	817460000	49
TPT1	Translationally-controlled tumor protein	P13693;P13693-2;Q56UQ5	P13693;P13693-2			NaN	0.0104032	NaN	-0.156383	0.35954	-0.21356	-1.58799	NaN	NaN	3	3	3	18	18	18	19.595	0	23.488	1041500000	21
TRA2B	Transformer-2 protein homolog beta	P62995;P62995-3;P62995-2	P62995;P62995-3			0.244067	-0.492219	NaN	0.211208	0.17448	-0.137536	-0.25224	0.516853	1.06269	4	4	4	11.8	11.8	11.8	33.665	0	27.382	456300000	14
TRAP1	Heat shock protein 75 kDa, mitochondrial	Q12931-2;Q12931	Q12931-2;Q12931			0.188296	0.170649	NaN	-0.176068	-0.455781	0.272904	0.411004	0.46823	NaN	13	13	13	29.3	29.3	29.3	74.267	0	129.33	2547100000	76
TRIM25	E3 ubiquitin/ISG15 ligase TRIM25	Q14258	Q14258			0.382669	-0.0260124	NaN	-0.824596	0.303698	0.164242	-0.349142	NaN	NaN	7	7	7	14.4	14.4	14.4	70.973	0	45.454	580510000	14
TRIM28	Transcription intermediary factor 1-beta	Q13263;Q13263-2	Q13263;Q13263-2			0.0705303	0.296124	-0.33007	-0.325981	0.108624	0.180773	0.15802	-0.0525128	0.0875591	20	20	20	35.1	35.1	35.1	88.549	0	323.31	14696000000	408
TRIP13	Pachytene checkpoint protein 2 homolog	Q15645;Q15645-2	Q15645			0.0911986	-0.470826	-0.000855764	0.0679957	0.2913	0.0211875	0.0418193	0.0584819	-0.109636	7	7	7	18.8	18.8	18.8	48.55	0	55.92	1063600000	48
TROVE2	60 kDa SS-A/Ro ribonucleoprotein	P10155-3;P10155-5;P10155-4;P10155	P10155-3;P10155-5;P10155-4;P10155			NaN	-0.0505161	NaN	NaN	-0.0169487	0.0674648	NaN	NaN	NaN	4	4	4	6.6	6.6	6.6	58.482	0	24.702	244460000	11
TSN	Translin	Q15631;Q15631-2	Q15631;Q15631-2			-0.505003	0.308649	NaN	0.127777	-0.298985	0.367563	0.07826	0.226616	NaN	4	4	4	21.1	21.1	21.1	26.183	0	29.719	1082300000	38
TSR1	Pre-rRNA-processing protein TSR1 homolog	Q2NL82	Q2NL82			NaN	NaN	0.00989008	-0.0175967	0.1321	-0.124393	NaN	NaN	-0.20325	4	4	4	4.9	4.9	4.9	91.809	0	24.748	333120000	9
TTLL12	Tubulin--tyrosine ligase-like protein 12	Q14166	Q14166			NaN	0.30885	NaN	-0.30885	NaN	NaN	0.111522	-0.229787	NaN	5	5	5	9.3	9.3	9.3	74.403	0	37.115	703900000	13
TUBA1B;TUBA4A	Tubulin alpha-1B chain;Tubulin alpha-4A chain	P68363;P68363-2;P68366-2;P68366;A6NHL2-2;A6NHL2;Q9H853	P68363;P68363-2;P68366-2;P68366			-1.1045	0.404493	-0.374872	-0.200176	0.613764	0.661291	-0.0988178	-0.503273	-0.489313	20	20	1	57.6	57.6	2.9	50.151	0	323.31	103410000000	803
TUBB	Tubulin beta chain	P07437;A6NNZ2;CON__ENSEMBL:ENSBTAP00000025008;Q9H4B7	P07437			-1.07517	0.934957	-0.268453	-1.18106	0.920878	0.668847	0.032958	-0.358785	-1.44508	20	5	4	61.5	19.4	16	49.67	0	183.35	29474000000	329
TUBB2B	Tubulin beta-2B chain	Q9BVA1	Q9BVA1			0.35647	0.0225636	NaN	-0.975344	0.352121	0.24419	0.297859	0.579683	NaN	20	5	1	61.3	16.9	2.7	49.953	0	59.474	2270700000	66
TUBB4B	Tubulin beta-4B chain	P68371;Q3ZCM7	P68371			-0.112846	0.289561	-1.07157	0.0253874	0.392838	0.476632	0.244666	-0.0255273	-0.845443	21	21	1	65.2	65.2	2.7	49.83	0	323.31	86504000000	1035
TUFM	Elongation factor Tu, mitochondrial	P49411	P49411			0.255075	0.266193	-1.09721	0.0186189	0.404106	0.153217	0.395532	0.103593	-1.06543	15	15	15	41.6	41.6	41.6	49.541	0	192.84	8537600000	208
TXLNA	Alpha-taxilin	P40222	P40222			0.337409	-0.0589167	-0.0663458	0.220275	-0.310853	-0.121569	0.160652	0.290918	-0.0263907	11	11	11	24.5	24.5	24.5	61.89	0	81.24	1629700000	59
TXN	Thioredoxin	P10599;P10599-2	P10599;P10599-2			-0.489777	0.679819	NaN	-0.322098	0.193315	-0.0612587	-0.0717415	-0.599528	-1.23246	5	5	5	42.9	42.9	42.9	11.737	0	42.817	4719100000	66
TXNDC17	Thioredoxin domain-containing protein 17	Q9BRA2	Q9BRA2			NaN	0.485675	NaN	-0.894485	0.200356	0.208453	-0.348836	-0.91678	NaN	3	3	3	26.8	26.8	26.8	13.941	0	19.828	886250000	26
TXNDC5	Thioredoxin domain-containing protein 5	Q8NBS9-2;Q8NBS9	Q8NBS9-2;Q8NBS9			0.473583	0.282953	NaN	-0.791874	0.072052	-0.0367146	0.414717	0.335861	-0.28125	9	9	9	26.9	26.9	26.9	36.177	0	63.358	1807900000	62
TXNL1	Thioredoxin-like protein 1	O43396	O43396			-0.0797793	0.350585	-0.0171267	0.0258935	-0.228833	-0.0507399	0.00372823	0.146568	0.757951	6	6	6	29.4	29.4	29.4	32.251	0	60.571	1822300000	59
TXNRD1	Thioredoxin reductase 1, cytoplasmic	Q16881-5;Q16881-2;Q16881-4;Q16881-3;Q16881-6;Q16881;Q16881-7	Q16881-5;Q16881-2;Q16881-4;Q16881-3;Q16881-6;Q16881;Q16881-7			-0.213723	-0.022748	-0.21643	-0.0328436	0.0568857	0.428859	-0.539975	-0.350915	0.954343	7	7	7	15.4	15.4	15.4	54.753	0	50.846	1050800000	38
TYMS	Thymidylate synthase	P04818;P04818-2;P04818-3	P04818;P04818-2			NaN	NaN	NaN	NaN	0.118219	-0.118219	NaN	NaN	NaN	10	10	10	36.1	36.1	36.1	35.716	0	169.91	20345000000	45
U2AF1;U2AF1L4	Splicing factor U2AF 35 kDa subunit;Splicing factor U2AF 26 kDa subunit	P0DN76;Q01081;Q01081-2;Q8WU68-3;Q8WU68;Q01081-3;Q01081-4;Q8WU68-2	P0DN76;Q01081;Q01081-2;Q8WU68-3;Q8WU68			0.300405	-0.339392	-0.167868	0.12982	0.353403	-0.276368	0.0185734	0.00856177	1.07775	5	5	5	22.5	22.5	22.5	27.872	0	126.43	2214200000	46
U2AF2	Splicing factor U2AF 65 kDa subunit	P26368-2;P26368	P26368-2;P26368			0.057935	0.658109	NaN	-1.52103	0.44901	0.355977	-0.514096	0.113607	NaN	8	8	8	28	28	28	53.12	0	76.215	1609600000	55
U2SURP	U2 snRNP-associated SURP motif-containing protein	O15042-2;O15042;O15042-3	O15042-2;O15042;O15042-3			0.177257	-0.329924	NaN	0.329162	NaN	-0.176495	0.119983	NaN	NaN	3	3	3	3.9	3.9	3.9	118.23	0	22.205	331910000	4
UBA1	Ubiquitin-like modifier-activating enzyme 1	P22314-2;P22314	P22314-2;P22314			-0.463033	0.299087	-0.479192	0.126719	0.472823	0.0435953	-0.274182	-0.323054	-0.783965	36	36	36	49	49	49	113.8	0	323.31	43209000000	650
UBA2	SUMO-activating enzyme subunit 2	Q9UBT2;Q9UBT2-2	Q9UBT2;Q9UBT2-2			0.351933	-0.0897331	0.265619	0.192503	-0.455616	-0.264706	0.358234	0.321869	0.414213	16	16	16	29.5	29.5	29.5	71.223	0	120.94	5602800000	145
UBA52;RPS27A;UBB;UBC	Ubiquitin-60S ribosomal protein L40;Ubiquitin;60S ribosomal protein L40;Ubiquitin-40S ribosomal protein S27a;Ubiquitin;40S ribosomal protein S27a;Polyubiquitin-B;Ubiquitin;Polyubiquitin-C;Ubiquitin	P62987;P62979;P0CG47;P0CG48	P62987;P62979;P0CG47;P0CG48			-0.653127	0.487473	-0.441176	0.20823	0.274272	0.124328	0.137017	-0.0312624	0.0274	5	5	5	36.7	36.7	36.7	14.728	0	55.803	7302100000	115
UBA6	Ubiquitin-like modifier-activating enzyme 6	A0AVT1;A0AVT1-2;A0AVT1-4;A0AVT1-3	A0AVT1;A0AVT1-2			-0.424956	-1.07038	0.374637	1.20546	-0.0929378	0.00817267	-0.337052	-0.554791	0.252082	5	5	5	4.6	4.6	4.6	117.97	0	29.307	293620000	23
UBAP2L	Ubiquitin-associated protein 2-like	Q14157-4;Q14157-1;Q14157-3;Q14157;Q14157-5	Q14157-4;Q14157-1;Q14157-3;Q14157;Q14157-5			0.16758	-0.552996	0.429407	0.117439	0.062685	-0.224115	0.619442	0.560354	0.157436	4	4	4	5.1	5.1	5.1	103.17	0	29.789	412210000	19
UBE2I	SUMO-conjugating enzyme UBC9	P63279	P63279			-0.00307274	0.132032	NaN	-0.0845127	-0.214733	0.170286	0.557926	0.303762	NaN	6	6	6	27.2	27.2	27.2	18.007	0	42.674	3550800000	43
UBE2L3	Ubiquitin-conjugating enzyme E2 L3	P68036;P68036-3;P68036-2;A0A1B0GUS4	P68036;P68036-3;P68036-2;A0A1B0GUS4			0.477006	-0.64874	1.62647	0.165069	-1.03596	-0.583838	0.159675	0.696071	0.45177	4	4	4	42.2	42.2	42.2	17.861	0	36.83	874590000	44
UBE2M	NEDD8-conjugating enzyme Ubc12	P61081	P61081			-0.0613686	-0.188934	0.42235	0.0303253	-0.203136	0.000763257	0.421936	0.895731	0.310868	4	4	4	20.8	20.8	20.8	20.9	0	41.314	1629000000	35
UBE2N;UBE2NL	Ubiquitin-conjugating enzyme E2 N;Putative ubiquitin-conjugating enzyme E2 N-like	P61088;Q5JXB2	P61088;Q5JXB2			0.0353902	-0.0965106	NaN	NaN	NaN	0.0611203	0.304595	0.454229	NaN	2	2	2	13.8	13.8	13.8	17.138	0.0007716	15.416	512950000	6
UBE2V1	Ubiquitin-conjugating enzyme E2 variant 1	Q13404;Q13404-7;Q13404-2;Q13404-1;Q13404-6;Q13404-8	Q13404;Q13404-7;Q13404-2;Q13404-1;Q13404-6;Q13404-8			0.453978	0.351473	-0.55169	0.245476	-0.226806	-0.272432	0.58441	0.26381	-0.635841	6	6	3	40.1	40.1	21.8	16.495	0	49.582	2100200000	47
UBL4A	Ubiquitin-like protein 4A	P11441	P11441			0.0754986	NaN	-0.0754986	NaN	NaN	NaN	-0.251284	NaN	0.00911903	3	3	3	18.5	18.5	18.5	17.776	0	17.753	342600000	4
UCHL1	Ubiquitin carboxyl-terminal hydrolase isozyme L1	P09936	P09936	+		0.132394	0.313137	-1.47235	0.544143	0.217558	0.265114	5.53853	5.22013	4.08968	18	18	18	89.7	89.7	89.7	24.824	0	323.31	656260000000	1140
UCHL3	Ubiquitin carboxyl-terminal hydrolase isozyme L3	P15374	P15374	+		NaN	NaN	NaN	-0.0129986	0.0129986	NaN	0.742859	1.19683	0.0253639	11	11	11	53.5	53.5	53.5	26.182	0	161.55	7771500000	120
UCHL5	Ubiquitin carboxyl-terminal hydrolase isozyme L5	Q9Y5K5-2;Q9Y5K5-4;Q9Y5K5-3;Q9Y5K5	Q9Y5K5-2;Q9Y5K5-4;Q9Y5K5-3;Q9Y5K5	+		NaN	0.0536413	NaN	-0.149758	0.104306	-0.0081892	0.441094	0.720746	NaN	5	5	5	18	18	18	36.079	0	34.635	730760000	19
UFC1	Ubiquitin-fold modifier-conjugating enzyme 1	Q9Y3C8	Q9Y3C8			-0.225033	NaN	NaN	0.225033	NaN	NaN	0.236149	0.050869	NaN	3	3	3	16.2	16.2	16.2	19.458	0	18.809	554340000	17
UGGT1	UDP-glucose:glycoprotein glucosyltransferase 1	Q9NYU2-2;Q9NYU2;Q9NYU1	Q9NYU2-2;Q9NYU2			0.507059	0.220598	-0.378987	-0.0452388	-0.241434	-0.0619968	0.165065	-0.0509055	NaN	10	10	10	6.4	6.4	6.4	174.97	0	59.443	977300000	20
UGP2	UTP--glucose-1-phosphate uridylyltransferase	Q16851-2;Q16851	Q16851-2;Q16851			NaN	0.0206828	0.0193915	NaN	-0.0293717	-0.0107026	NaN	0.302404	NaN	5	5	5	10.1	10.1	10.1	55.676	0	32.101	419630000	28
UMPS	Uridine 5-monophosphate synthase;Orotate phosphoribosyltransferase;Orotidine 5-phosphate decarboxylase	P11172-3;P11172;P11172-2;P11172-4	P11172-3;P11172;P11172-2;P11172-4			0	NaN	NaN	NaN	NaN	NaN	-0.110613	0.022646	NaN	4	4	4	10.1	10.1	10.1	42.495	0	25.291	278720000	10
UNC45A	Protein unc-45 homolog A	Q9H3U1-2;Q9H3U1	Q9H3U1-2;Q9H3U1			0.529972	-0.529972	NaN	NaN	NaN	NaN	0.0335636	0.25717	-0.229334	9	9	9	9.4	9.4	9.4	101.67	0	53.449	951100000	21
UPF1	Regulator of nonsense transcripts 1	Q92900-2;Q92900	Q92900-2;Q92900			0.454246	-0.647193	0.55045	-0.269959	0.23656	-0.324103	-0.3527	-0.180631	0.826018	11	11	11	12.1	12.1	12.1	123.03	0	76.665	966910000	52
UQCRC1	Cytochrome b-c1 complex subunit 1, mitochondrial	P31930	P31930			0.413633	-0.331861	-0.165241	0.475657	-0.0617161	-0.330471	0.243773	0.490652	-0.217777	9	9	9	23.5	23.5	23.5	52.645	0	67.084	1074900000	63
UQCRC2	Cytochrome b-c1 complex subunit 2, mitochondrial	P22695	P22695			NaN	-0.184025	-0.486292	0.510771	0.476616	-0.31707	-0.0050087	0.0313282	-0.493908	9	9	9	27.4	27.4	27.4	48.442	0	152.93	1539700000	53
UQCRFS1;UQCRFS1P1	Cytochrome b-c1 complex subunit Rieske, mitochondrial;Cytochrome b-c1 complex subunit 11;Putative cytochrome b-c1 complex subunit Rieske-like protein 1	P47985;P0C7P4	P47985;P0C7P4			0.217578	-0.458192	NaN	0.284118	0.00195198	-0.0454552	0.298602	0.803506	0.149567	6	6	6	26.6	26.6	26.6	29.668	0	49.731	1136800000	27
UQCRQ	Cytochrome b-c1 complex subunit 8	O14949	O14949			-0.0753959	-0.0878871	-0.173617	0.734653	-0.330252	-0.0675014	-0.63776	-0.275696	-0.5446	8	8	8	58.5	58.5	58.5	9.9062	0	133.86	19302000000	182
USO1	General vesicular transport factor p115	O60763;O60763-2	O60763;O60763-2			0.181467	-0.454223	0.150517	0.622774	-0.262521	-0.238014	0.403435	0.19991	0.55003	6	6	6	7.5	7.5	7.5	107.89	0	45.043	423240000	30
USP14	Ubiquitin carboxyl-terminal hydrolase 14	P54578-2;P54578-3;P54578	P54578-2;P54578-3;P54578	+		0.480323	0.414643	-0.681022	0.171912	-0.315885	-0.0699705	0.47802	0.745864	-1.33114	10	10	10	25.5	25.5	25.5	52.385	0	96.925	2243400000	58
USP5	Ubiquitin carboxyl-terminal hydrolase 5	P45974-2;P45974	P45974-2;P45974	+		-0.0485557	-0.240132	0.436327	0.137855	0.129255	-0.414749	-0.0757068	0.131056	0.761663	15	15	15	27.9	27.9	27.9	93.307	0	187.55	3444700000	140
USP7	Ubiquitin carboxyl-terminal hydrolase 7	Q93009-3;Q93009	Q93009-3;Q93009	+		0.215113	-0.0349038	-0.0713704	0.585168	-0.466855	-0.227151	0.408051	0.172248	0.23296	15	15	15	15.9	15.9	15.9	126.27	0	114.02	1850100000	73
USP9X;USP9Y	Probable ubiquitin carboxyl-terminal hydrolase FAF-X;Probable ubiquitin carboxyl-terminal hydrolase FAF-Y	Q93008-1;Q93008;O00507;O00507-2	Q93008-1;Q93008;O00507;O00507-2	+		0.425931	-0.30959	0.240627	0.0165799	-0.100657	-0.272891	-0.168175	-0.0654647	0.11824	24	24	24	10.3	10.3	10.3	290.46	0	205.15	5027700000	121
VAPA	Vesicle-associated membrane protein-associated protein A	Q9P0L0;Q9P0L0-2	Q9P0L0;Q9P0L0-2			0.197453	-0.430432	-0.706325	0.691232	0.222169	0.0259027	-0.112863	0.110501	-0.736281	5	5	4	25.3	25.3	20.5	27.893	0	39.169	2558200000	39
VARS	Valine--tRNA ligase	P26640;P26640-2	P26640			0.369124	-0.263561	-0.373794	0.555142	-0.113065	-0.173847	-0.453929	-0.0531133	-0.48965	16	16	16	16.4	16.4	16.4	140.47	0	146.38	3810500000	109
VAT1	Synaptic vesicle membrane protein VAT-1 homolog	Q99536;Q99536-3;Q99536-2	Q99536;Q99536-3;Q99536-2			0.571611	0.368376	-0.0815563	-0.361872	-0.599779	0.10322	0.255011	0.270634	-0.528566	7	7	7	24.2	24.2	24.2	41.92	0	68.404	1601500000	44
[truncated: 37 more rows]
