# Supplementary material for: Activity-based protein profiling reveals deubiquitinase and aldehyde dehydrogenase targets of a cyanopyrrolidine probe
Source: RSC Med Chem. 2021 Aug 16;12(11):1935–43. doi: 10.1039/d1md00218j (PMC8597422; doi:10.1039/d1md00218j)
Supplement: MD-012-D1MD00218J-s003 [file MD-012-D1MD00218J-s003.xlsx]

## Sheet: Data S2
Supplementary Data S2. Competitive ABPP
Competitive activity-based protein profiling (ABPP) of the first-generation compounds (ABP MT16-205)
LFQ proteomics analysis of ABP MT16-205 labelling in competition with MT16-001 and MT16-009.
Filtering (all values table):
Removed: Potential contaminants, Reverse, Only identified by site
All reporter intensities logarithmized (values)
Values required in minimum 2 out of 3 samples (condition)
Values required in minimum 2 razor + unique peptides

## Sheet: All protein IDs
Gene names	Protein names	Protein IDs (Uniprot accession)	Majority protein IDs (Uniprot accession)	DUBs	ALDHs	Log2 intensity values															N: Peptides	N: Razor + unique peptides	N: Unique peptides	N: Sequence coverage [%]	N: Unique + razor sequence coverage [%]	N: Unique sequence coverage [%]	N: Mol. weight [kDa]	N: Q-value	N: Score	N: Intensity	N: MS/MS count
						DMSO (1)	DMSO (2)	DMSO (3)	MT16-205 130 nM (1)	MT16-205 130 nM (2)	MT16-205 130 nM (3)	MT16-205 + MT16-001 130 nM (1)	MT16-205 + MT16-001 130 nM (2)	MT16-205 + MT16-001 130 nM (3)	MT16-205 + MT16-001 500 nM (1)	MT16-205 + MT16-001 500 nM (2)	MT16-205 + MT16-001 500 nM (3)	MT16-205 + MT16-009 500 nM (1)	MT16-205 + MT16-009 500 nM (2)	MT16-205 + MT16-009 500 nM (3)
RTN4	Reticulon-4	Q9NQC3-2;Q9NQC3-5;Q9NQC3;Q9NQC3-3;Q9NQC3-4;Q9NQC3-6	Q9NQC3-2;Q9NQC3-5;Q9NQC3;Q9NQC3-3;Q9NQC3-4;Q9NQC3-6			-0.932078	NaN	0.932078	1.38297	2.16778	2.32609	2.17529	2.10979	2.36773	2.50629	2.03517	1.79304	1.96427	2.62162	2.20076	7	7	7	28.7	28.7	28.7	40.317	0	51.51	1030700000	55
FAU	40S ribosomal protein S30	P62861	P62861			-0.838858	0.683957	0.154901	-0.596097	-0.336013	-1.88993	-2.0673	-2.86866	-2.21585	-0.0454356	-1.70926	-0.40449	-1.54239	-1.19345	-1.53914	2	2	2	18.6	18.6	18.6	6.6478	0	15.537	651930000	34
HMGB2	High mobility group protein B2	P26583	P26583			-0.821817	0.371127	0.45069	-0.629764	NaN	-0.648383	0.423524	0.0652911	-0.0896123	-0.0970319	0.354798	0.0210292	0.309434	NaN	-0.290948	2	2	2	12.9	12.9	12.9	24.033	0	14.434	274280000	28
YBX1	Nuclease-sensitive element-binding protein 1	P67809	P67809			-0.655271	0.953929	-0.298658	-1.99864	NaN	NaN	-0.684861	-0.163713	0.321507	-0.28687	0.0304953	0.2785	0.169211	-0.772376	-1.21187	6	6	6	28.7	28.7	28.7	35.924	0	67.899	446670000	18
DCD	Dermcidin;Survival-promoting peptide;DCD-1	P81605;P81605-2	P81605;P81605-2			-0.628572	1.35362	-0.72505	-1.24119	NaN	NaN	-0.870792	NaN	-0.282137	-0.824194	-1.04898	0.140814	-1.21373	-0.168453	0.254539	3	3	3	22.7	22.7	22.7	11.284	0	25.061	438060000	27
RPL22	60S ribosomal protein L22	P35268	P35268			-0.596436	0.0573483	0.539087	0.277758	-0.111418	0.159225	0.0201664	-0.202333	-0.636343	-0.128473	-0.183697	-0.369156	-0.469557	-0.205189	-0.496218	2	2	2	18.8	18.8	18.8	14.787	0	25.08	1790300000	41
TMEM263	Transmembrane protein 263	Q8WUH6	Q8WUH6			-0.57976	0.565042	0.0147171	-1.16081	0.0931149	-0.0450649	0.297714	-1.0739	0.479147	0.477869	-0.928343	-0.0210571	0.129368	-0.166609	0.234806	4	4	4	52.6	52.6	52.6	11.748	0	56.903	1216800000	47
VDAC1	Voltage-dependent anion-selective channel protein 1	P21796	P21796			-0.556368	-0.0635223	0.61989	0.114092	-0.182257	0.0196362	0.014637	-0.0422287	0.268185	0.133606	-0.0137882	-0.247629	-0.118706	0.23402	0.51973	4	4	4	12.4	12.4	12.4	30.772	0	35.08	1051500000	51
EIF3E	Eukaryotic translation initiation factor 3 subunit E	P60228	P60228			-0.532503	-0.352013	0.884516	-0.642315	-0.755644	0.0548553	-0.550562	-0.510431	-0.279972	0.0236568	-0.488958	-0.483025	-0.666998	-0.691256	-0.458075	11	11	11	27.6	27.6	27.6	52.22	0	100.87	1784500000	142
TMEM33	Transmembrane protein 33	P57088	P57088			-0.532485	-0.413511	0.945996	-0.376911	-0.166402	0.994496	0.312663	0.127242	0.29424	0.156529	0.165553	NaN	-0.980705	-0.218444	-0.448099	3	3	3	12.6	12.6	12.6	27.978	0	32.446	314510000	31
ACTL6A	Actin-like protein 6A	O96019-2;O96019	O96019-2;O96019			-0.50318	-0.387329	0.890509	-1.0171	-1.01981	-0.848646	-0.650579	-0.441357	0.197371	-0.223675	-0.393923	-0.888672	-0.842806	NaN	-0.826122	3	3	3	12.9	12.9	12.9	43.236	0	27.147	317120000	20
ALDH3A2	Fatty aldehyde dehydrogenase	P51648;P51648-2;P48448;P43353-2;P30838;P43353	P51648;P51648-2		x	-0.472649	0.0755514	0.397098	3.27508	2.43347	2.72738	3.11646	2.75375	2.99538	3.58943	3.07134	3.24569	3.05577	3.42282	3.3079	8	8	8	18.1	18.1	18.1	54.847	0	67.756	1480200000	97
ELAC2	Zinc phosphodiesterase ELAC protein 2	Q9BQ52-4;Q9BQ52;Q9BQ52-3;Q9BQ52-2	Q9BQ52-4;Q9BQ52;Q9BQ52-3;Q9BQ52-2			-0.463799	0.241266	0.222532	0.697111	1.13153	1.26187	0.448935	0.366962	-0.000991821	0.355152	-0.0241508	0.278021	0.504032	0.653469	0.951607	6	6	6	10.2	10.2	10.2	87.563	0	51.306	413950000	39
FKBP3	Peptidyl-prolyl cis-trans isomerase FKBP3	Q00688	Q00688			-0.439504	0.226264	0.21324	0.16787	0.086146	-0.391952	-0.468768	-0.336326	-0.396936	NaN	-0.322036	0.23816	-0.474386	-0.252254	-0.239282	3	3	3	13.4	13.4	13.4	25.177	0	28.396	307430000	32
PNN	Pinin	Q9H307	Q9H307			-0.422246	-0.211524	0.633771	-1.16427	-1.19222	NaN	-0.817697	-0.537664	-0.0203641	-0.275314	-0.24113	-0.28005	-0.977023	NaN	-0.592895	3	3	3	4.3	4.3	4.3	81.627	0	19.272	90647000	12
FKBP1A	Peptidyl-prolyl cis-trans isomerase FKBP1A	P62942	P62942			-0.400694	0.127609	0.273085	-0.11314	-0.409657	0.133066	-0.0984116	0.119616	-0.058218	-0.261185	-0.0381508	0.449173	0.0573692	0.134426	-0.0162163	2	2	2	25	25	25	11.951	0	28.684	327270000	32
PRPF8	Pre-mRNA-processing-splicing factor 8	Q6P2Q9	Q6P2Q9	+		-0.395248	NaN	0.395248	-0.762079	0.717279	0.0772934	0.234808	0.746773	-0.00978851	0.187704	0.272858	-0.318958	-0.00308228	NaN	0.141474	11	11	11	4.6	4.6	4.6	273.6	0	65.62	331250000	22
RPL11	60S ribosomal protein L11	P62913;P62913-2	P62913;P62913-2			-0.380092	0.393647	-0.0135549	NaN	NaN	1.09784	0.477057	0.66433	0.681243	NaN	0.70963	0.173974	1.25456	0.527699	0.943873	4	4	4	24.2	24.2	24.2	20.252	0	106.79	1912900000	53
PAFAH1B3	Platelet-activating factor acetylhydrolase IB subunit gamma	Q15102	Q15102			-0.371672	0.0748247	0.296848	0.393009	0.20433	0.729616	0.400323	0.706464	0.655187	0.578248	0.316829	NaN	0.19507	0.720138	0.785629	4	4	4	22.1	22.1	22.1	25.734	0	34.825	365470000	13
VAPA	Vesicle-associated membrane protein-associated protein A	Q9P0L0;Q9P0L0-2;O95292-2;O95292	Q9P0L0;Q9P0L0-2			-0.366604	0.123419	0.243185	0.17642	-0.044775	0.609657	-0.33972	0.120291	-0.289961	-0.42099	0.324219	0.193842	-0.0277939	NaN	-0.616865	4	4	4	21.7	21.7	21.7	27.893	0	30.741	487160000	25
IARS	Isoleucine--tRNA ligase, cytoplasmic	P41252	P41252			-0.349669	-0.27953	0.629198	-0.411186	0.0206089	-0.0156345	-0.370235	-0.736427	-1.08114	-0.307611	-0.345924	-0.989796	-0.754057	-0.88666	0.107601	11	11	11	9.2	9.2	9.2	144.5	0	65.285	513310000	42
MYH10	Myosin-10	P35580;P35580-5;P35580-2;P35580-3;P35580-4	P35580;P35580-5;P35580-2;P35580-3;P35580-4			-0.349116	0.299381	0.0497354	-1.02943	NaN	-1.55022	-1.76141	-1.72775	-1.19116	-1.50502	-1.39875	-1.32899	-1.19643	-2.10491	-1.22128	12	6	5	7.2	4.3	3.8	229	0	44.425	225670000	18
NONO	Non-POU domain-containing octamer-binding protein	Q15233-2;Q15233	Q15233-2;Q15233			-0.343702	0.0348892	0.308813	-0.0388699	NaN	NaN	0.624136	0.0708637	0.197664	-0.170158	0.0842037	-0.289532	-0.161884	0.244125	-0.302792	6	6	5	19.4	19.4	17.3	43.866	0	40.146	511270000	17
NDUFA4	Cytochrome c oxidase subunit NDUFA4	O00483	O00483			-0.321114	-0.11989	0.441004	NaN	NaN	-0.269688	0.202971	0.167627	0.276999	0.0110645	0.000370026	-0.305561	-0.13895	NaN	0.149763	3	3	3	32.1	32.1	32.1	9.3697	0	19.84	608310000	26
RPS6	40S ribosomal protein S6	P62753	P62753			-0.320838	0.488253	-0.167415	-0.593353	0.378535	0.237403	0.447957	0.21275	-0.0189508	-0.265649	0.16836	0.370616	0.621871	0.208186	0.391331	7	7	7	27.7	27.7	27.7	28.68	0	146.14	8789500000	121
EZR	Ezrin	P15311;P35241-3	P15311			-0.31844	0.122941	0.195499	0.207012	0.502105	0.623979	0.132961	0.544065	0.187709	0.146545	0.631925	0.630689	0.757045	-0.45031	-0.0392806	15	15	9	22.4	22.4	14.3	69.412	0	98.744	1967400000	111
VARS	Valine--tRNA ligase	P26640;P26640-2	P26640			-0.318311	0.180949	0.137362	0.0374591	0.343049	-0.16228	-0.238914	-0.0929159	-0.183454	-0.26967	-0.201907	0.0608527	-0.461065	-0.634578	-0.249082	13	13	13	12.4	12.4	12.4	140.47	0	100.61	1312500000	80
CLIC4	Chloride intracellular channel protein 4	Q9Y696	Q9Y696			-0.304288	0.178766	0.125522	-0.0136801	-0.0596739	0.43313	0.580369	0.250587	0.519067	0.367206	0.431777	-0.0951735	NaN	0.428502	0.665113	3	3	3	19	19	19	28.772	0	27.97	306020000	23
GSTO1	Glutathione S-transferase omega-1	P78417;P78417-3;P78417-2	P78417;P78417-3;P78417-2			-0.303808	0.275463	0.0283451	0.547865	0.341051	0.51265	0.147343	0.0144539	-0.177242	0.331316	0.205917	0.268682	0.308964	0.220522	0.275555	11	11	11	42.3	42.3	42.3	27.566	0	107.81	2069700000	119
NCBP1	Nuclear cap-binding protein subunit 1	Q09161	Q09161			-0.303153	0.198575	0.104579	0.521178	0.611415	0.446988	0.112849	-0.173662	-0.0542253	0.121428	0.0521914	-0.616645	0.154549	0.594052	0.350341	4	4	4	5.3	5.3	5.3	91.838	0	28.166	344630000	28
SEC22B	Vesicle-trafficking protein SEC22b	O75396	O75396			-0.301471	NaN	0.301471	-1.08232	-0.722024	-0.425288	-0.320226	NaN	0.539611	0.170365	-0.361899	NaN	NaN	NaN	-0.369111	5	5	5	25.6	25.6	25.6	24.593	0	42.937	140980000	26
GLOD4	Glyoxalase domain-containing protein 4	Q9HC38-2;Q9HC38;Q9HC38-3	Q9HC38-2;Q9HC38			-0.299191	0.155313	0.143878	0.505285	0.742273	0.704221	0.19997	0.36565	0.406709	0.0675805	0.316955	0.238714	0.663198	0.378812	0.648	6	6	6	22.5	22.5	22.5	33.232	0	44.171	714140000	52
JUP	Junction plakoglobin	P14923	P14923			-0.293197	0.463874	-0.170677	-1.40411	-1.3702	-1.1738	-0.925514	-1.11098	-0.325612	-0.814718	2.00477	-0.670501	-0.752233	-0.461282	-0.704614	12	12	11	18	18	17	81.744	0	98.874	673650000	35
LRRC47	Leucine-rich repeat-containing protein 47	Q8N1G4	Q8N1G4			-0.291886	-0.311553	0.603439	0.430168	0.840511	0.80453	-0.351338	-0.0071036	0.0269235	0.0281728	0.4475	-0.260354	-0.121295	0.126594	0.300409	8	8	8	16	16	16	63.472	0	51.648	435970000	30
PIN4	Peptidyl-prolyl cis-trans isomerase NIMA-interacting 4	Q9Y237;Q9Y237-2;Q9Y237-3	Q9Y237;Q9Y237-2;Q9Y237-3			-0.279066	-0.0517426	0.330809	0.708109	NaN	NaN	-0.108273	-0.13966	-0.144341	-0.097908	0.167244	-0.451088	NaN	NaN	0.747902	2	2	2	32.1	32.1	32.1	13.81	0	20.756	252920000	22
EPRS	Bifunctional glutamate/proline--tRNA ligase;Glutamate--tRNA ligase;Proline--tRNA ligase	P07814	P07814			-0.278606	0.145783	0.132823	-0.947929	-0.964031	-1.21028	-0.22014	-0.111785	-0.430854	-0.530433	-0.70993	-1.20506	-0.874029	-0.353671	-0.165397	13	13	13	11.1	11.1	11.1	170.59	0	99.73	913980000	68
ETFA	Electron transfer flavoprotein subunit alpha, mitochondrial	P13804-2;P13804	P13804-2;P13804			-0.273597	NaN	0.273597	0.78155	1.05793	0.378398	-0.123921	0.158549	0.0259333	-0.0161676	-0.0815077	0.137246	0.290511	NaN	0.386287	4	4	4	19.7	19.7	19.7	30.025	0	27.786	296120000	27
PARP1	Poly [ADP-ribose] polymerase 1	P09874	P09874			-0.271124	-0.193499	0.464622	0.0785065	0.213596	0.0764732	0.0613689	0.173077	-0.0171947	-0.130369	-0.16576	-0.224064	-0.126436	0.0327148	-0.181494	30	30	30	33.3	33.3	33.3	113.08	0	252.01	6435200000	316
EFTUD2	116 kDa U5 small nuclear ribonucleoprotein component	Q15029-2;Q15029-3;Q15029	Q15029-2;Q15029-3;Q15029			-0.270631	0.12733	0.143302	0.377072	-0.183305	0.0288798	0.289441	0.0551821	-0.340902	0.0282408	-0.21676	-0.297101	-0.0136998	0.211568	0.101767	13	12	12	17.4	16.3	16.3	105.38	0	84.681	1407200000	91
SRSF11	Serine/arginine-rich splicing factor 11	Q05519-2;Q05519	Q05519-2;Q05519			-0.263955	0.2538	0.0101554	-0.344989	-0.470332	0.502946	-1.15722	0.468617	-0.533519	0.342572	-0.486055	-0.130575	-0.118602	-0.202964	-0.0774873	5	5	5	15.1	15.1	15.1	53.413	0	80.109	1366000000	67
CKAP4	Cytoskeleton-associated protein 4	Q07065	Q07065			-0.260353	-0.0987015	0.359055	2.24225	2.03262	2.32441	2.39859	2.18574	2.43621	2.81013	2.42131	1.77431	2.22884	2.4737	2.15666	27	27	27	50.3	50.3	50.3	66.022	0	323.31	6780200000	312
PPP5C	Serine/threonine-protein phosphatase 5	P53041	P53041			-0.257959	0.149739	0.10822	-0.116094	NaN	1.11871	0.511134	0.509003	0.792233	-0.072595	0.339839	0.223296	0.502995	0.296113	0.0872771	6	6	6	11.8	11.8	11.8	56.878	0	35.914	349720000	31
ATP5O	ATP synthase subunit O, mitochondrial	P48047	P48047			-0.257818	-0.309134	0.566952	-0.790178	-0.248896	0.0983372	-0.573828	-0.923967	-0.422579	-0.142754	-0.531965	-0.584942	-0.820925	0.136711	-0.616186	7	7	7	39.4	39.4	39.4	23.277	0	73.839	2514900000	93
TPT1	Translationally-controlled tumor protein;TPT1-like protein	P13693;P13693-2;Q56UQ5	P13693;P13693-2;Q56UQ5			-0.251823	0.358614	-0.106791	-0.988827	NaN	NaN	-0.430494	0.00668144	NaN	-0.580721	0.41374	-0.401155	-0.278078	-0.0257912	-0.842489	4	4	4	25.6	25.6	25.6	19.595	0	28.783	619250000	21
CFL1	Cofilin-1	P23528;Q9Y281-3;Q9Y281	P23528			-0.248567	0.230078	0.0184886	1.18728	1.28076	1.93264	0.796616	0.802079	0.925732	0.825707	0.68067	0.791287	1.00408	0.943869	1.26978	10	10	9	68.7	68.7	64.5	18.502	0	153.29	8442100000	169
C1QBP	Complement component 1 Q subcomponent-binding protein, mitochondrial	Q07021	Q07021			-0.247954	0.182514	0.0654405	0.337797	0.899806	0.816058	-0.321511	-0.0783164	-0.11687	-0.0147025	-0.195826	-0.707059	-0.322386	-0.0455252	0.149288	5	5	5	22	22	22	31.362	0	71.955	2633700000	102
PFKP	ATP-dependent 6-phosphofructokinase, platelet type	Q01813;Q01813-2	Q01813;Q01813-2			-0.243809	0.308038	-0.0642287	0.756509	0.796932	1.43142	0.696775	0.4596	0.253986	0.859294	0.335071	0.708005	0.541198	1.16429	0.716935	12	12	9	18.1	18.1	13.4	85.595	0	82.329	881170000	36
RNPEP	Aminopeptidase B	Q9H4A4	Q9H4A4			-0.242639	0.0711562	0.171483	0.152661	0.881863	0.704192	0.515795	0.648555	0.643441	-0.0388406	0.076821	-0.153129	0.526421	-0.137851	0.315522	9	9	9	15.7	15.7	15.7	72.595	0	76.103	661870000	64
TMX1	Thioredoxin-related transmembrane protein 1	Q9H3N1	Q9H3N1			-0.242273	-0.149684	0.391957	-0.388599	NaN	0.257498	-0.107396	0.128405	0.124247	0.352852	-0.256313	-0.0873578	NaN	0.24738	0.321763	5	5	5	17.9	17.9	17.9	31.791	0	40.842	259440000	39
BCLAF1	Bcl-2-associated transcription factor 1	Q9NYF8-3;Q9NYF8-2;Q9NYF8;Q9NYF8-4	Q9NYF8-3;Q9NYF8-2;Q9NYF8;Q9NYF8-4			-0.242034	-0.254981	0.497016	-1.22407	-0.811649	-1.49266	-0.155605	-0.324901	-0.922067	0.143653	-0.429307	-0.730094	-0.853141	-0.509466	-0.860202	9	9	9	12.7	12.7	12.7	100.23	0	77.505	803810000	51
SLC25A6	ADP/ATP translocase 3;ADP/ATP translocase 3, N-terminally processed	P12236	P12236			-0.2409	-0.084816	0.325716	0.922569	0.286591	0.659353	0.126234	0.226954	0.227438	0.232822	0.111025	0.542833	0.424789	1.17421	0.386259	11	3	2	34.9	11.1	7.4	32.866	0	27.23	1760300000	51
EIF3L	Eukaryotic translation initiation factor 3 subunit L	Q9Y262;Q9Y262-2	Q9Y262;Q9Y262-2			-0.238792	-0.153371	0.392163	-0.174859	-0.127649	0.000446955	-0.0735391	-0.00812658	0.340531	-0.260606	0.0034701	-0.399612	-0.126613	-0.466871	0.179885	10	10	10	16.1	16.1	16.1	66.726	0	65.9	591910000	65
USP9X;USP9Y	Probable ubiquitin carboxyl-terminal hydrolase FAF-X;Probable ubiquitin carboxyl-terminal hydrolase FAF-Y	Q93008-1;Q93008;O00507;O00507-2	Q93008-1;Q93008;O00507;O00507-2	+		-0.234893	0.174225	0.0606677	-0.362817	-0.634179	-0.538112	0.30958	0.149291	0.0108763	-0.0277418	0.0910937	-0.55318	-0.551505	0.0169665	-0.670636	16	16	16	6.7	6.7	6.7	290.46	0	110.41	831710000	94
ATP2A2	Sarcoplasmic/endoplasmic reticulum calcium ATPase 2	P16615;P16615-5;P16615-2;P16615-3;P16615-4;O14983-2;O14983;O14983-3;Q93084-4;Q93084-2;Q93084-3;Q93084-7;Q93084;Q93084-6;Q93084-5	P16615;P16615-5;P16615-2;P16615-3;P16615-4			-0.23355	-0.000916163	0.234466	2.34533	2.31517	1.92939	2.60038	2.33968	2.3981	2.67606	2.44969	1.93651	2.08101	2.29476	2.31748	33	33	33	33.5	33.5	33.5	114.76	0	323.31	13806000000	357
ALDH9A1	4-trimethylaminobutyraldehyde dehydrogenase	P49189;P49189-2	P49189;P49189-2		x	-0.233482	0.290251	-0.0567684	7.2446	6.90876	6.64648	4.9184	4.47776	4.82829	3.98899	3.72813	3.57944	6.57036	6.40975	6.62347	25	25	25	50.2	50.2	50.2	53.801	0	323.31	60626000000	422
DNAJA1	DnaJ homolog subfamily A member 1	P31689;P31689-2	P31689;P31689-2			-0.233123	0.0642064	0.168916	-0.323132	0.113759	-0.0794055	-0.13085	-0.0303218	-0.190283	-0.170754	-0.525672	-0.493527	-0.00186412	0.15743	-0.537841	6	6	6	24.9	24.9	24.9	44.868	0	48.687	953820000	57
PDIA6	Protein disulfide-isomerase A6	Q15084-5;Q15084-3;Q15084;Q15084-4;Q15084-2	Q15084-5;Q15084-3;Q15084;Q15084-4;Q15084-2			-0.223759	0.25078	-0.0270214	1.35056	1.45526	1.47497	0.260393	0.783188	0.412958	0.467886	0.470457	0.501068	0.515829	0.357658	0.690493	9	9	9	25.6	25.6	25.6	53.261	0	118.48	2654400000	137
CPNE1	Copine-1	Q99829	Q99829			-0.22248	0.306391	-0.0839113	1.33229	0.741164	0.724375	0.68821	0.471032	0.493643	0.324814	-0.0529073	0.23856	0.357348	0.527411	0.346038	4	4	4	6.9	6.9	6.9	59.058	0	28.052	338230000	37
VDAC2	Voltage-dependent anion-selective channel protein 2	P45880-2;P45880;P45880-1	P45880-2;P45880;P45880-1			-0.219035	0.0946973	0.124338	1.60139	1.67586	1.88089	1.7889	1.76139	1.75413	2.16492	1.96707	1.68534	1.77294	1.38262	1.93547	13	13	13	58	58	58	30.412	0	200.56	12295000000	144
ARF4	ADP-ribosylation factor 4	P18085	P18085			-0.216803	0.153168	0.0636349	1.10077	0.874012	1.19004	0.209448	0.32749	0.564192	0.4076	0.406534	0.291048	0.777687	0.647476	0.603762	6	6	4	37.2	37.2	19.4	20.511	0	50.524	1393400000	79
PSMA5	Proteasome subunit alpha type-5	P28066;P28066-2	P28066;P28066-2			-0.216782	0.0240364	0.192745	-0.551624	NaN	-0.0847187	-0.629089	-0.104006	0.0800781	-0.299677	0.0446987	-0.239428	0.0871658	0.0685101	-0.377176	5	5	5	24.1	24.1	24.1	26.411	0	51.138	694290000	59
TPM3	Tropomyosin alpha-3 chain	P06753-2;P06753-3;P06753-6;P06753-5;P06753-4;P06753-7	P06753-2;P06753-3;P06753-6;P06753-5;P06753-4			-0.21537	0.356953	-0.141584	0.276709	0.324355	0.545726	-0.144901	-0.256475	-0.253244	0.102683	0.225436	0.0300967	0.045777	-0.223394	0.0768229	12	12	7	40.7	40.7	22.2	29.032	0	122.28	1662000000	93
RPS12	40S ribosomal protein S12	P25398	P25398			-0.214931	0.329466	-0.114534	0.645786	0.054266	0.604483	-0.0293121	0.0159817	-0.0261078	0.0791245	-0.447479	-0.0264359	0.338717	0.452003	0.71875	5	5	5	48.5	48.5	48.5	14.515	0	46.306	1658500000	35
PCBP2	Poly(rC)-binding protein 2	Q15366-6;Q15366-3;Q15366;Q15366-2;Q15366-7;Q15366-8;Q15366-4;Q15366-5	Q15366-6;Q15366-3;Q15366;Q15366-2;Q15366-7;Q15366-8;Q15366-4;Q15366-5			-0.212114	0.236374	-0.0242596	0.16684	0.367182	0.50086	0.357321	0.409126	-0.0976009	0.294786	0.184153	0.191788	0.0971336	0.0168324	0.589878	7	3	3	26	13	13	38.15	0	26.833	1412500000	46
SRRM1	Serine/arginine repetitive matrix protein 1	Q8IYB3-2;Q8IYB3	Q8IYB3-2;Q8IYB3			-0.211459	-0.227933	0.439391	-1.32388	-0.273495	-0.203698	-0.606169	-0.157475	-0.267462	-0.00164096	-0.461768	0.00421651	-0.455529	-0.316092	-1.12143	6	6	6	10.6	10.6	10.6	102.12	0	73.655	1412900000	85
STT3A	Dolichyl-diphosphooligosaccharide--protein glycosyltransferase subunit STT3A	P46977;P46977-2	P46977;P46977-2			-0.211356	-0.171828	0.383184	0.463012	0.314464	0.921155	0.724277	1.01342	1.39625	0.987779	0.566816	0.0123456	0.372806	0.877057	0.485618	6	6	6	8.2	8.2	8.2	80.529	0	52.868	664860000	48
PSMA1	Proteasome subunit alpha type-1	P25786;P25786-2	P25786;P25786-2			-0.210586	-0.0798467	0.290433	0.331742	-0.436721	0.169415	0.172141	0.133506	-0.152698	0.222434	0.0521132	-0.0165494	-0.262754	0.622542	-0.387273	5	5	5	18.3	18.3	18.3	29.555	0	32.533	654370000	63
OLA1	Obg-like ATPase 1	Q9NTK5;Q9NTK5-2;Q9NTK5-3	Q9NTK5;Q9NTK5-2			-0.210552	0.121231	0.0893211	0.895838	0.976858	1.56109	0.0481243	-0.165434	0.212519	-0.0765629	-0.0911922	0.315447	0.167704	-0.135857	0.875635	6	6	6	17.9	17.9	17.9	44.743	0	43.98	456390000	44
RANBP1	Ran-specific GTPase-activating protein	P43487-2;P43487	P43487-2;P43487			-0.207106	0.0743904	0.132715	0.277386	0.139284	0.249578	-0.241913	-0.271246	-0.0764408	0.333529	0.11964	0.0294952	-0.228333	-0.40736	0.0953388	5	5	5	38	38	38	23.239	0	49.891	1863600000	77
HNRNPA2B1	Heterogeneous nuclear ribonucleoproteins A2/B1	P22626;P22626-2	P22626;P22626-2			-0.205269	-0.0348854	0.240154	-0.156315	0.498043	-0.642456	0.059288	2.92282	0.360605	0.479155	0.412527	0.480238	0.00471497	-0.344585	-0.345495	12	12	12	42.8	42.8	42.8	37.429	0	101.3	1722500000	73
DSG1	Desmoglein-1	Q02413;Q02413-2	Q02413			-0.199633	0.290471	-0.0908381	NaN	NaN	NaN	NaN	0.110235	-0.0402342	-0.0390803	2.97147	-0.169839	-0.460839	NaN	-0.306636	8	8	8	9.9	9.9	9.9	113.75	0	60.08	249010000	12
ALDOA	Fructose-bisphosphate aldolase A	P04075;P04075-2;P05062	P04075;P04075-2			-0.199511	-0.00875537	0.208267	0.0598119	-0.11621	0.195045	-0.267569	-0.06029	0.00317128	-0.0979029	-0.0547873	0.543311	0.0266488	-0.308512	-0.155232	19	19	17	69.5	69.5	59.9	39.42	0	323.31	21503000000	377
EIF3I	Eukaryotic translation initiation factor 3 subunit I	Q13347	Q13347			-0.197666	0.026261	0.171405	0.0952555	-0.951724	-0.0927919	0.112326	0.416178	0.304419	-0.173253	0.00604312	-0.537797	-0.128242	0.667985	0.107806	7	7	7	24	24	24	36.501	0	51.222	810400000	65
TNPO1	Transportin-1	Q92973-2;Q92973;Q92973-3;O14787-2;O14787	Q92973-2;Q92973;Q92973-3			-0.197308	0.32641	-0.129101	0.54399	0.937915	0.827535	0.189576	0.121991	0.348436	0.419269	0.285613	0.292552	-0.0721842	-0.01533	0.293428	13	13	13	16.3	16.3	16.3	101.31	0	92.769	1277800000	90
FEN1	Flap endonuclease 1	P39748;P39748-2	P39748;P39748-2			-0.195468	0.195468	NaN	NaN	0.422414	0.800166	0.256499	0.496118	-0.0320196	-0.170953	0.28177	-0.422177	-0.255359	-0.223857	-0.044322	3	3	3	12.4	12.4	12.4	42.592	0	28.127	326380000	14
DARS	Aspartate--tRNA ligase, cytoplasmic	P14868;P14868-2	P14868;P14868-2			-0.193302	0.025444	0.167858	0.379688	0.622301	0.397425	-0.103514	-0.0488453	-0.0727139	0.0543461	-0.193085	-0.425589	-0.0596638	-0.484943	0.313313	14	14	14	33.7	33.7	33.7	57.136	0	114.09	1657100000	112
MYBBP1A	Myb-binding protein 1A	Q9BQG0;Q9BQG0-2	Q9BQG0;Q9BQG0-2			-0.192896	-0.383604	0.5765	0.0733871	0.678932	0.542877	0.457182	-0.0139389	0.467491	0.709368	0.312937	0.179935	0.778351	0.184942	0.649151	8	8	8	6.3	6.3	6.3	148.85	0	57.8	334190000	48
PSMB2	Proteasome subunit beta type-2	P49721	P49721			-0.192853	-0.146228	0.33908	NaN	0.484624	-0.0227782	-0.308238	0.602748	0.166375	0.288801	-0.0584933	-0.168151	0.645246	0.683204	0.478502	4	4	4	20.9	20.9	20.9	22.836	0	27.189	426910000	38
HK1	Hexokinase-1	P19367-4;P19367-2;P19367;P19367-3;P52789	P19367-4;P19367-2;P19367;P19367-3			-0.190814	-0.115154	0.305968	-0.0423692	-0.265088	-0.386699	0.537978	-0.109773	0.206412	0.209418	0.243596	-0.116845	0.0976893	0.482602	-0.0477422	12	12	11	13.8	13.8	12.8	101.08	0	78.726	754280000	54
RBBP7	Histone-binding protein RBBP7	Q16576;Q16576-2	Q16576;Q16576-2			-0.18922	0.107569	0.0816504	0.238518	1.19489	0.488988	0.323231	0.160899	0.0876471	-0.128993	-0.217149	0.262183	0.0889765	0.494933	0.300555	8	8	3	20.2	20.2	11.5	47.82	0	96.584	3853400000	94
HNRNPK	Heterogeneous nuclear ribonucleoprotein K	P61978-3;P61978;P61978-2	P61978-3;P61978;P61978-2			-0.189088	0.157614	0.0314738	0.05992	-0.0556348	-0.191432	-0.4311	-0.201261	-0.283349	0.0259062	0.060847	-0.0743421	-0.144731	-0.0425084	-0.0345662	15	15	15	40.7	40.7	40.7	48.562	0	140.83	3201100000	176
ATP5C1	ATP synthase subunit gamma, mitochondrial	P36542-2;P36542	P36542-2;P36542			-0.188617	-0.0681661	0.256783	0.29847	NaN	0.117757	0.044953	0.158948	0.128491	0.365344	0.0523631	NaN	NaN	0.0607325	-0.185466	4	4	4	14.1	14.1	14.1	32.881	0	27.388	320750000	21
GLRX3	Glutaredoxin-3	O76003	O76003			-0.186185	0.143581	0.0426038	0.981494	0.641284	0.449556	0.447128	-0.0525309	0.277061	0.271066	-0.104062	0.412332	0.329751	0.505679	0.522987	6	6	6	16.7	16.7	16.7	37.432	0	54.172	896310000	73
RCC2	Protein RCC2	Q9P258	Q9P258			-0.181711	-0.24044	0.42215	-0.547086	-0.292158	-0.613378	0.0356795	0.265828	0.127812	-0.269954	-0.408773	-0.164062	-0.476146	0.434554	-0.180053	6	6	6	18	18	18	56.084	0	41.06	615510000	42
NDUFS1	NADH-ubiquinone oxidoreductase 75 kDa subunit, mitochondrial	P28331-4;P28331-5;P28331;P28331-2;P28331-3	P28331-4;P28331-5;P28331;P28331-2;P28331-3			-0.181688	0.141896	0.0397917	0.249947	-0.517495	-0.0315526	0.0109088	-0.458141	-0.228252	0.462773	-0.268859	-0.0337003	0.243861	-0.200673	-0.455604	7	7	7	12.8	12.8	12.8	73.527	0	48.621	456260000	25
TXN	Thioredoxin	P10599;P10599-2	P10599;P10599-2			-0.179887	0.0649999	0.114887	-0.0608527	0.125827	0.81915	-0.694236	-0.391402	-0.178572	-0.0401198	-0.0613543	-0.21729	0.00575956	-0.352412	0.421398	5	5	5	42.9	42.9	42.9	11.737	0	39.886	1340800000	56
RPS15A	40S ribosomal protein S15a	P62244	P62244			-0.179122	0.00456301	0.174559	1.03596	0.673464	0.783057	0.214482	0.154635	0.051665	0.359042	0.33141	0.204817	0.461571	0.126136	0.479664	5	5	5	46.2	46.2	46.2	14.839	0	44.326	2799300000	76
DHX15	Pre-mRNA-splicing factor ATP-dependent RNA helicase DHX15	O43143	O43143			-0.176512	0.218627	-0.0421149	0.889592	0.662916	0.438932	-0.394211	-0.243994	-0.671332	-0.0821864	-0.947804	-0.250928	-0.0984198	-0.214385	0.0537465	8	8	8	10.6	10.6	10.6	90.932	0	51.547	552930000	32
ECHS1	Enoyl-CoA hydratase, mitochondrial	P30084	P30084			-0.171609	-0.139273	0.310882	0.454248	NaN	0.494613	0.157466	0.127031	-0.337355	0.0318635	0.000508626	0.0463289	0.583192	1.02881	0.0126413	5	5	5	22.1	22.1	22.1	31.387	0	39.544	480180000	42
CALR	Calreticulin	P27797	P27797			-0.170984	0.0475426	0.123442	-0.615677	-0.221697	0.0914001	-0.122635	0.240135	0.282827	0.393938	0.905876	1.33092	0.319901	0.345976	-0.115908	8	8	8	27.6	27.6	27.6	48.141	0	65.34	2035400000	109
TPM4	Tropomyosin alpha-4 chain	P67936;P67936-2	P67936;P67936-2			-0.17089	0.527801	-0.356911	-0.215571	-0.169406	-0.402205	-0.459508	-0.266364	-0.362765	-0.120164	0.178104	-0.220202	0.0569871	-0.196452	-0.368189	6	4	4	19	13.3	13.3	28.521	0	27.082	249630000	27
RPL8	60S ribosomal protein L8	P62917	P62917			-0.170568	0.155638	0.0149307	-0.604492	-1.74558	-0.746107	-0.333786	-0.0839958	-0.472244	-0.29928	-0.0861816	-0.242453	-0.0460835	-0.0420837	-0.413687	6	6	6	22.2	22.2	22.2	28.024	0	51.415	2577000000	89
AK2	Adenylate kinase 2, mitochondrial;Adenylate kinase 2, mitochondrial, N-terminally processed	P54819-3;P54819-5;P54819-2;P54819;P54819-4;P54819-6	P54819-3;P54819-5;P54819-2;P54819;P54819-4;P54819-6			-0.166269	0.0616099	0.104659	-0.821153	-0.489599	-1.10793	-1.17882	-0.75011	NaN	-0.218356	-0.0367692	-0.665578	-0.726259	-0.638429	-0.636953	4	4	4	23.8	23.8	23.8	22.265	0	25.917	183940000	30
PFN1	Profilin-1	P07737;CON__P02584	P07737			-0.164163	0.233628	-0.069465	0.539412	1.02319	1.14688	0.24915	0.401194	0.439089	0.302331	0.332572	0.27653	0.169182	0.123871	0.59989	9	9	9	81.4	81.4	81.4	15.054	0	124.02	9592800000	166
BLMH	Bleomycin hydrolase	Q13867	Q13867			-0.161848	0.0558186	0.10603	-0.509153	0.32818	0.0452385	0.547546	0.121361	0.437176	0.295942	0.335133	0.640585	0.329996	-0.652973	0.32472	6	6	6	17.1	17.1	17.1	52.562	0	40.401	582380000	49
RPL6	60S ribosomal protein L6	Q02878	Q02878			-0.161222	-0.0980047	0.259226	-1.08473	-1.22173	-1.51859	-0.484443	-0.762309	-0.65092	-0.7847	-0.634998	-0.616136	-0.314775	-0.493274	-0.523876	17	17	17	46.2	46.2	46.2	32.728	0	250.21	19949000000	280
EIF3C;EIF3CL	Eukaryotic translation initiation factor 3 subunit C;Eukaryotic translation initiation factor 3 subunit C-like protein	Q99613-2;Q99613;B5ME19	Q99613-2;Q99613;B5ME19			-0.161112	0.00496419	0.156148	-0.0525538	0.75953	0.478361	0.198522	0.387739	0.108917	0.286664	0.0433706	-0.35793	0.117292	0.25876	0.254699	11	11	11	14.8	14.8	14.8	104.1	0	75.889	902080000	60
EPB41L3	Band 4.1-like protein 3;Band 4.1-like protein 3, N-terminally processed	Q9Y2J2-2;Q9Y2J2-4;Q9Y2J2;Q9Y2J2-3	Q9Y2J2-2;Q9Y2J2-4;Q9Y2J2			-0.159928	0.0916684	0.0682596	0.0570405	NaN	0.312543	0.336995	0.373102	-0.154561	0.181796	-0.0715396	0.118678	-0.247126	0.37585	0.0764879	6	6	5	9.8	9.8	9	96.513	0	42.431	254830000	16
HMGB1	High mobility group protein B1	P09429;B2RPK0	P09429			-0.158162	0.118447	0.0397155	-0.497995	-2.09246	-0.840284	0.0959384	-0.10836	0.158669	-0.154809	0.192979	-0.286842	0.600558	0.592717	-0.0589631	6	6	6	22.3	22.3	22.3	24.893	0	56.158	1069200000	86
BANF1	Barrier-to-autointegration factor;Barrier-to-autointegration factor, N-terminally processed	O75531	O75531			-0.156046	0.156046	NaN	NaN	1.0046	0.246063	-1.14292	-0.427517	-1.34286	0.30411	-0.504438	0.22654	0.175682	-1.30504	-0.0538521	2	2	2	40.4	40.4	40.4	10.058	0	25.391	518870000	29
MAGED2	Melanoma-associated antigen D2	Q9UNF1;Q9UNF1-2;Q9Y5V3;Q9Y5V3-2	Q9UNF1;Q9UNF1-2			-0.155401	0.191278	-0.0358772	-0.0494747	NaN	NaN	0.232302	0.362631	0.759764	0.287292	0.161512	-0.00858116	-0.404068	0.481358	0.314598	6	6	6	16.5	16.5	16.5	64.953	0	53.484	280120000	34
RPL7	60S ribosomal protein L7	P18124	P18124			-0.153666	-0.311205	0.46487	-0.252363	-0.383106	0.0615597	-0.0250053	-0.223612	-0.120972	-0.267471	-0.00490952	-0.422691	0.134356	0.244843	-0.0226135	12	12	12	44	44	44	29.225	0	107.72	5100400000	202
WDR1	WD repeat-containing protein 1	O75083;O75083-3	O75083;O75083-3			-0.152315	0.034111	0.118204	0.485109	0.108551	0.122496	0.39723	0.393867	0.315977	-0.111803	-0.130316	0.0409622	0.366318	0.275566	0.539171	8	8	8	17.7	17.7	17.7	66.193	0	72.546	1357600000	49
CAPNS1	Calpain small subunit 1	P04632;Q96L46	P04632			-0.15045	0.0145245	0.135925	0.145977	-0.763859	-0.875435	-0.0265884	-0.0776405	-0.175266	0.26757	0.153572	0.317951	-0.273836	0.272285	0.214624	5	5	5	25.4	25.4	25.4	28.315	0	60.403	884790000	57
EIF2S2	Eukaryotic translation initiation factor 2 subunit 2	P20042	P20042			-0.149314	0.0592492	0.0900644	-0.373673	0.0622228	0.100751	0.620984	0.49821	0.833911	0.297004	0.569089	-0.270772	0.39858	0.172412	-0.165137	5	5	5	18.6	18.6	18.6	38.388	0	34.774	229380000	15
MCM2	DNA replication licensing factor MCM2	P49736	P49736			-0.148657	0.244087	-0.0954291	-0.091273	-0.458699	0.122302	0.0200857	0.314113	0.37189	0.199481	0.176652	0.363159	0.0991414	0.604305	0.155015	8	8	8	11.6	11.6	11.6	101.89	0	66.963	842540000	42
TXNDC5	Thioredoxin domain-containing protein 5	Q8NBS9-2;Q8NBS9	Q8NBS9-2;Q8NBS9			-0.148566	-0.299708	0.448274	1.25809	1.4226	1.69297	-0.0195376	0.432922	0.919965	0.432985	0.472293	0.732822	0.636524	0.248781	1.42034	6	6	6	21	21	21	36.177	0	54.017	787610000	87
U2AF1	Splicing factor U2AF 35 kDa subunit	P0DN76;Q01081;Q01081-2;Q01081-4;Q01081-3;Q8WU68-3;Q8WU68-2;Q8WU68	P0DN76;Q01081;Q01081-2;Q01081-4			-0.148153	0.0134646	0.134688	-0.883775	NaN	NaN	0.32807	0.0737712	-0.00192197	0.0143515	-0.0609239	-0.0927327	0.24953	-1.00425	-0.246805	4	4	4	21.2	21.2	21.2	27.872	0	55.553	655240000	41
PNP	Purine nucleoside phosphorylase	P00491	P00491			-0.147987	0.174051	-0.0260639	0.868618	1.54964	1.54637	0.139519	0.509762	0.529579	0.620155	-0.033844	0.779562	0.655342	0.518942	1.08997	11	11	11	49.5	49.5	49.5	32.118	0	107.25	1145800000	97
FDPS	Farnesyl pyrophosphate synthase	P14324-2;P14324	P14324-2;P14324			-0.147462	-0.292743	0.440205	0.79118	0.05955	0.526124	-0.00940069	-0.762061	0.285039	0.618327	0.119311	-0.02152	-0.536601	0.174328	0.241885	5	5	5	17.6	17.6	17.6	40.532	0	36.213	732360000	34
RPL24	60S ribosomal protein L24	P83731	P83731			-0.146928	0.431793	-0.284865	0.922008	0.46251	0.91891	0.0514119	0.168788	-0.0992877	-0.564202	0.149883	1.09711	0.808154	0.300865	0.942157	3	3	3	19.1	19.1	19.1	17.779	0	20.57	2255200000	43
PRDX4	Peroxiredoxin-4	Q13162	Q13162			-0.144988	0.289485	-0.144498	-0.499171	-0.537783	-0.107798	-0.333758	0.480878	-0.497048	-0.303677	-0.488139	-0.301379	-0.579608	-0.671492	-0.569327	7	5	5	29.2	23.6	23.6	30.54	0	46.85	1574900000	61
NME2	Nucleoside diphosphate kinase B	P22392-2;P22392;O60361	P22392-2;P22392			-0.143746	0.228139	-0.0843932	0.370645	0.648786	0.0540021	0.34724	0.0434564	-0.0452086	0.292516	-0.10205	0.110074	0.0834115	0.0805696	0.627178	12	12	4	66.3	66.3	16.5	30.137	0	92.868	6534600000	168
HSPA8	Heat shock cognate 71 kDa protein	P11142;P11142-2;P54652	P11142;P11142-2			-0.143153	0.131692	0.0114606	0.230888	0.609292	0.571737	-0.292702	0.137172	-0.043143	0.0167764	0.229734	0.36901	0.139905	0.0495694	0.206069	27	25	22	44.1	41	38.5	70.897	0	323.31	28454000000	517
GPS1	COP9 signalosome complex subunit 1	Q13098-5;Q13098;Q13098-7;Q13098-6	Q13098-5;Q13098;Q13098-7;Q13098-6			-0.142981	-0.135674	0.278655	-0.550877	-0.291749	-0.912669	-0.0317923	0.23993	0.442878	-0.10501	0.180784	-0.877379	-0.0526606	0.550548	-0.313811	4	4	4	12.9	12.9	12.9	55.092	0	25.994	218590000	34
RPS2	40S ribosomal protein S2	P15880	P15880			-0.142844	0.00104268	0.141801	0.203626	0.745315	0.037494	0.581258	0.306278	0.348611	0.345394	0.689172	0.464471	0.585161	0.429942	0.73797	10	10	10	35.8	35.8	35.8	31.324	0	102.25	5040700000	119
PSMC5	26S protease regulatory subunit 8	P62195-2;P62195;Q8NB90-3;Q8NB90-2;Q8NB90	P62195-2;P62195			-0.141729	0.0880705	0.0536582	-0.0880922	0.0969016	0.770718	-0.464052	-0.248411	0.604914	0.249596	0.431853	0.442225	0.425831	-0.412469	0.443972	9	9	9	29.1	29.1	29.1	44.784	0	66.513	1234300000	54
USP14	Ubiquitin carboxyl-terminal hydrolase 14	P54578-2;P54578-3;P54578	P54578-2;P54578-3;P54578	+		-0.14109	-0.381608	0.522698	-0.25316	-0.144203	-0.261541	0.388999	0.594817	0.789838	0.310174	0.439103	-0.0516408	0.495547	0.481042	0.519725	7	7	7	19.4	19.4	19.4	52.385	0	56.469	637920000	50
RPL10	60S ribosomal protein L10	P27635;Q96L21	P27635			-0.140741	-0.029232	0.169973	-0.484535	-0.591919	NaN	-0.110168	-0.0335197	-0.170464	-0.362076	0.0515041	-0.0520668	0.157969	-0.431028	-0.382622	5	5	5	20.1	20.1	20.1	24.604	0	45.911	1372600000	53
PRMT5	Protein arginine N-methyltransferase 5;Protein arginine N-methyltransferase 5, N-terminally processed	O14744;O14744-5;O14744-2;O14744-3;O14744-4	O14744;O14744-5;O14744-2;O14744-3			-0.13743	0.173382	-0.0359529	0.941676	1.17119	1.32085	0.412659	0.195588	0.216361	0.0529963	0.13501	0.0254428	0.266633	-0.0745481	0.688817	7	7	7	12.7	12.7	12.7	72.683	0	55.221	848230000	62
SRSF3	Serine/arginine-rich splicing factor 3	P84103-2;P84103	P84103-2;P84103			-0.136695	-0.120104	0.256799	-0.335045	0.130966	0.334977	-0.115826	0.0148652	-0.631087	0.124019	-0.324826	-0.345214	-0.954829	-0.535285	-0.529513	4	4	3	36.3	36.3	25	14.203	0	37.145	729370000	58
HSD17B4	Peroxisomal multifunctional enzyme type 2;(3R)-hydroxyacyl-CoA dehydrogenase;Enoyl-CoA hydratase 2	P51659;P51659-3;P51659-2	P51659;P51659-3;P51659-2			-0.136594	0.526448	-0.389854	0.243807	1.06113	0.13999	0.320193	0.456834	0.798865	0.786195	0.562283	0.690264	0.763585	0.409665	0.659383	8	8	8	14.9	14.9	14.9	79.685	0	58.514	538730000	59
RPS23	40S ribosomal protein S23	P62266	P62266			-0.134412	-0.210594	0.345006	0.010121	-0.611986	-0.510278	0.20741	0.00505702	-0.382247	-0.670867	0.0429293	0.196629	0.109536	-0.424316	0.26818	4	4	4	29.4	29.4	29.4	15.807	0	31.557	2522700000	75
EIF3K	Eukaryotic translation initiation factor 3 subunit K	Q9UBQ5-2;Q9UBQ5	Q9UBQ5-2;Q9UBQ5			-0.133635	NaN	0.133635	-0.208496	0.288914	0.294712	-0.365108	-0.589182	-0.246172	-0.216036	-0.175516	-0.108541	-0.490545	-0.386017	-0.178726	2	2	2	11.8	11.8	11.8	24.484	0	14.351	279450000	20
ACTN4	Alpha-actinin-4	O43707;O43707-2;O43707-3;P35609-2;P35609;Q08043;Q9H254-2;Q9H254-4;Q9H254	O43707;O43707-2			-0.132952	-0.126206	0.259158	0.45782	0.563186	0.716092	-0.125746	0.783078	-0.142546	-0.352631	0.156427	0.129333	-0.0697829	0.0488027	0.264547	29	29	22	41.4	41.4	33.3	104.85	0	249.47	3156500000	185
COX5B	Cytochrome c oxidase subunit 5B, mitochondrial	P10606	P10606			-0.128076	0.243506	-0.11543	0.523925	0.367245	0.717255	-0.0963148	0.180564	-0.235637	0.133959	-0.596359	0.239426	-0.0433782	0.514744	0.43077	4	4	4	24.8	24.8	24.8	13.696	0	28.106	422250000	30
PSMD3	26S proteasome non-ATPase regulatory subunit 3	O43242;O43242-2	O43242;O43242-2			-0.127256	0.0363655	0.0908909	-0.0160618	0.682753	-0.112495	0.218678	0.286116	-0.0161076	0.225298	-0.108528	-0.184311	-0.219303	0.0359116	0.047842	11	11	11	23.4	23.4	23.4	60.977	0	95.076	897570000	72
SEC61B	Protein transport protein Sec61 subunit beta	P60468	P60468			-0.125539	-0.160459	0.285998	-0.244321	NaN	-0.51914	0.7811	0.497695	0.58698	0.844729	0.726556	0.35792	0.095967	NaN	-0.188098	3	3	3	37.5	37.5	37.5	9.9743	0	24.183	270670000	31
NUP205	Nuclear pore complex protein Nup205	Q92621	Q92621			-0.125501	-0.33588	0.461381	0.35781	-0.948158	NaN	0.394742	0.0959517	-0.0405076	0.0560881	NaN	-0.0614446	0.0959517	0.0448023	0.0879008	8	8	8	4.8	4.8	4.8	227.92	0	46.453	264490000	15
MSN	Moesin	P26038	P26038			-0.125263	0.0832081	0.0420551	-0.519306	-0.381168	-0.163902	0.224869	0.35236	0.461191	0.268814	0.161039	-0.116331	0.128296	0.642948	-0.0898647	13	7	7	17.9	9.7	9.7	67.819	0	48.963	466920000	67
TXNRD1	Thioredoxin reductase 1, cytoplasmic	Q16881-5;Q16881-2;Q16881-4;Q16881-3;Q16881-6;Q16881;Q16881-7	Q16881-5;Q16881-2;Q16881-4;Q16881-3;Q16881-6;Q16881;Q16881-7			-0.125139	-0.231036	0.356175	-0.90875	-0.344663	-0.224056	-0.858175	-0.0494684	-0.061643	-0.624231	-0.252309	-0.706353	-0.370937	-0.277446	-0.777118	5	5	5	10.6	10.6	10.6	54.753	0	34.833	280360000	41
RTCB	tRNA-splicing ligase RtcB homolog	Q9Y3I0	Q9Y3I0			-0.125103	0.0682201	0.0568829	0.30994	1.25671	0.868286	0.348852	0.220533	0.158304	0.0474014	0.0506153	-0.226801	0.430241	0.807699	0.0237656	12	12	12	29.1	29.1	29.1	55.21	0	80.587	1336300000	81
RPL18	60S ribosomal protein L18	Q07020;Q07020-2	Q07020;Q07020-2			-0.124964	-0.421152	0.546116	-1.10851	-0.58243	-0.899227	-0.200981	-1.05168	-0.902657	-1.23745	-0.779715	-1.231	-0.9436	-0.315025	-0.947138	11	11	11	47.3	47.3	47.3	21.634	0	228.45	79280000000	332
RPS17	40S ribosomal protein S17	P08708	P08708			-0.12443	-0.309683	0.434114	-0.133015	1.068	0.663734	0.0730642	-0.299925	0.191484	-0.135897	-0.0980899	-0.932231	-0.551377	0.118806	-0.555646	4	4	4	47.4	47.4	47.4	15.55	0	48.936	1751300000	49
ACOT7	Cytosolic acyl coenzyme A thioester hydrolase	O00154-6;O00154-4;O00154-5;O00154-7;O00154;O00154-2;O00154-3	O00154-6;O00154-4;O00154-5;O00154-7;O00154;O00154-2;O00154-3			-0.123708	0.0936915	0.0300166	1.00066	1.0503	0.876185	0.275483	0.153702	-0.324947	0.113656	0.281203	0.323769	0.177563	0.139926	0.853083	6	6	6	20.4	20.4	20.4	36.567	0	43.818	1031500000	33
KHSRP	Far upstream element-binding protein 2	Q92945;Q96I24-2;Q96I24	Q92945			-0.123229	-0.0615304	0.18476	0.277667	0.166421	0.717204	0.559933	0.61076	0.669383	0.688065	0.48626	0.516007	0.399699	0.320613	0.527131	21	21	19	41.6	41.6	38.5	73.114	0	225.67	5452800000	234
ACAT1	Acetyl-CoA acetyltransferase, mitochondrial	P24752;P24752-2	P24752			-0.121265	-0.126516	0.24778	0.820969	0.21823	0.420424	0.682282	0.408427	0.516341	0.499447	-0.0587343	0.316691	0.940051	0.897933	0.790223	10	10	10	33.3	33.3	33.3	45.199	0	117.28	1424300000	83
CCT3	T-complex protein 1 subunit gamma	P49368;P49368-2	P49368;P49368-2			-0.119476	0.0694523	0.050024	0.249992	0.711336	0.303833	0.0435085	0.230267	0.00796318	-0.0139999	0.120512	0.410475	0.13258	0.016634	0.166447	23	23	23	45.1	45.1	45.1	60.533	0	235.27	7950300000	271
FUBP1	Far upstream element-binding protein 1	Q96AE4;Q96AE4-2	Q96AE4;Q96AE4-2			-0.119254	0.0582835	0.0609709	0.235194	-0.702798	-0.297981	0.1183	-0.0834592	0.0679957	-0.0775998	-0.166334	-0.476243	-0.308273	0.503085	0.221591	10	8	8	16.6	14.3	14.3	67.56	0	56.282	628900000	50
DSP	Desmoplakin	P15924;P15924-3;P15924-2	P15924;P15924-3;P15924-2			-0.119155	0.346721	-0.227566	-2.11875	-2.71674	-3.92208	-1.03768	-0.572426	-0.46468	-1.32917	1.96541	-1.22446	-1.77822	-1.06179	-1.03388	54	54	54	19.3	19.3	19.3	331.77	0	323.31	1830600000	115
DNM1L	Dynamin-1-like protein	O00429-4;O00429-5;O00429-3;O00429-2;O00429;O00429-8;O00429-6;O00429-7	O00429-4;O00429-5;O00429-3;O00429-2;O00429;O00429-8;O00429-6;O00429-7			-0.11894	0.0684992	0.0504405	-0.0411504	0.273917	-0.00151571	0.362502	0.131747	0.222371	-0.340364	0.0806166	-0.0398248	-0.157235	0.0746333	0.284962	4	4	4	6.2	6.2	6.2	78.099	0	26.179	314830000	25
HNRNPC;HNRNPCL4;HNRNPCL1;HNRNPCL3;HNRNPCL2	Heterogeneous nuclear ribonucleoproteins C1/C2;Heterogeneous nuclear ribonucleoprotein C-like 4;Heterogeneous nuclear ribonucleoprotein C-like 1;Heterogeneous nuclear ribonucleoprotein C-like 3;Heterogeneous nuclear ribonucleoprotein C-like 2	P07910-4;P0DMR1;P07910-2;O60812;B7ZW38;B2RXH8;P07910;P07910-3	P07910-4;P0DMR1;P07910-2;O60812;B7ZW38;B2RXH8;P07910;P07910-3			-0.116198	-0.145609	0.261806	0.281187	NaN	NaN	NaN	0.499725	0.00231934	0.680468	1.00602	0.467306	0.0933132	0.132257	0.298412	2	2	2	8.4	8.4	8.4	27.821	0	14.935	319110000	23
ACAT2	Acetyl-CoA acetyltransferase, cytosolic	Q9BWD1;Q9BWD1-2	Q9BWD1;Q9BWD1-2			-0.114952	-0.103657	0.218609	1.84058	1.94991	2.26479	1.74979	1.66195	1.69145	1.94005	1.39404	1.61637	1.56302	1.99902	1.77312	10	10	10	36	36	36	41.35	0	140.53	4890400000	139
PDIA4	Protein disulfide-isomerase A4	P13667	P13667			-0.114746	0.120207	-0.00546074	0.274115	0.578709	0.365616	0.122965	0.202606	-0.00743484	0.0680351	0.0184631	-0.452791	-0.324186	0.10228	-0.241861	19	19	19	34.3	34.3	34.3	72.932	0	154.06	2807200000	199
SUPT16H	FACT complex subunit SPT16	Q9Y5B9	Q9Y5B9			-0.112955	0.16588	-0.0529251	0.48735	0.370848	0.48089	-0.140997	-0.339182	-0.00877571	-0.23278	-0.412064	-0.0225334	0.252316	-0.113457	-0.252855	11	11	11	12.1	12.1	12.1	119.91	0	83.834	1045000000	61
PSMA6	Proteasome subunit alpha type-6	P60900;P60900-2;P60900-3	P60900;P60900-2			-0.112841	0.0762933	0.036548	-0.0821158	-0.853406	-0.0501334	-0.370602	0.201152	-0.263093	-0.119677	-0.0787589	-0.0659663	0.208255	-0.464322	-0.0750319	7	7	7	32.1	32.1	32.1	27.399	0	54.627	812630000	68
GART	Trifunctional purine biosynthetic protein adenosine-3;Phosphoribosylamine--glycine ligase;Phosphoribosylformylglycinamidine cyclo-ligase;Phosphoribosylglycinamide formyltransferase	P22102;P22102-2	P22102			-0.111769	0.175142	-0.0633723	0.165119	0.0538572	0.501142	0.265273	-0.18011	0.0271924	0.00514348	-0.190392	-0.0504595	-0.0659758	0.0949262	0.0634206	15	15	15	19	19	19	107.77	0	111.25	1105300000	68
RPN1	Dolichyl-diphosphooligosaccharide--protein glycosyltransferase subunit 1	P04843	P04843			-0.111737	0.0430921	0.0686448	0.322646	0.0377897	0.242441	0.0643953	0.17427	0.0204366	-0.120291	0.0482896	0.336391	0.214822	-0.145592	0.32693	14	14	14	25.2	25.2	25.2	68.569	0	136.2	1007500000	66
RARS	Arginine--tRNA ligase, cytoplasmic	P54136;P54136-2	P54136;P54136-2			-0.111208	0.190928	-0.0797195	0.257534	0.102888	0.338863	0.038496	0.186687	0.2756	0.366302	0.00452805	0.0502777	0.0767212	0.283846	0.319523	13	13	13	22.9	22.9	22.9	75.378	0	103.04	978740000	86
PFAS	Phosphoribosylformylglycinamidine synthase	O15067	O15067			-0.109596	0.129129	-0.0195332	0.615324	0.896196	0.869829	0.26807	0.323397	0.05933	-0.29022	0.113703	-0.394211	0.0158691	0.0273857	-0.222631	6	6	6	5	5	5	144.73	0	45.506	632740000	56
PPA1	Inorganic pyrophosphatase	Q15181	Q15181			-0.108722	0.0397498	0.0689723	0.216654	0.670409	0.859648	0.12064	0.107785	-0.232526	-0.0312169	-0.57747	-0.0525316	-0.117503	-0.316137	-0.0960267	5	5	5	19.4	19.4	19.4	32.66	0	39.873	812790000	44
CCT5	T-complex protein 1 subunit epsilon	P48643;P48643-2	P48643;P48643-2			-0.108613	0.160193	-0.0515798	0.652667	0.453545	0.838767	0.2179	0.0723254	-0.00642713	0.275441	0.0689456	0.166321	0.216372	0.360205	0.236399	19	19	19	37.9	37.9	37.9	59.67	0	174.82	4045300000	195
RPS20	40S ribosomal protein S20	P60866;P60866-2	P60866;P60866-2			-0.107913	-0.246236	0.354149	0.280226	-0.660226	-0.583831	0.488598	-0.18118	-0.031709	0.038592	0.22177	0.23948	0.231539	0.366265	0.275574	3	3	3	22.7	22.7	22.7	13.373	0	29.865	2411200000	46
KARS	Lysine--tRNA ligase	Q15046;Q15046-2	Q15046;Q15046-2			-0.107367	0.0727189	0.0346483	0.34941	0.0608457	0.808667	0.0579446	-0.0574118	0.220283	0.16237	-0.133902	-0.516432	0.116901	0.406993	0.0954145	7	7	7	12.6	12.6	12.6	68.047	0	47.794	376350000	43
RRM2	Ribonucleoside-diphosphate reductase subunit M2	P31350;P31350-2	P31350;P31350-2			-0.106174	0.09191	0.0142638	0.531718	0.301421	0.916409	NaN	-0.300237	-0.0795492	0.155249	NaN	NaN	-0.186641	0.47392	0.220004	3	3	3	9.5	9.5	9.5	44.877	0	20.534	183480000	13
RAN	GTP-binding nuclear protein Ran	P62826	P62826			-0.105611	0.106946	-0.00133451	0.215926	0.194834	-0.0231851	0.322795	0.294017	0.48823	-0.0515931	-0.0828966	0.129943	-0.0387796	0.20525	0.321191	8	8	8	38.9	38.9	38.9	24.423	0	93.578	6946600000	123
DDX17	Probable ATP-dependent RNA helicase DDX17	Q92841-1;Q92841-3;Q92841;Q92841-2	Q92841-1;Q92841-3;Q92841;Q92841-2			-0.104589	-0.370906	0.475495	-0.0382875	0.268025	0.791136	0.00535456	-0.314596	-0.972272	-0.148242	-0.0964731	-0.122911	-0.48653	-0.0829786	-0.11791	12	12	10	20.5	20.5	17.4	72.371	0	94.975	1475900000	94
TUBB	Tubulin beta chain	P07437;A6NNZ2;CON__ENSEMBL:ENSBTAP00000025008;Q9H4B7	P07437			-0.103871	0.138288	-0.0344168	0.889898	1.08414	1.06031	0.110875	0.520625	0.435628	0.571599	0.36716	0.277047	0.578636	0.421373	0.741241	20	5	4	61.5	19.4	16	49.67	0	150.61	13871000000	213
RPS11	40S ribosomal protein S11	P62280	P62280			-0.103696	-0.147181	0.250877	-0.0318724	-1.23272	-0.480225	0.314998	0.331548	0.165664	0.430127	-0.173217	-0.438023	0.0306714	0.272052	0.07142	7	7	7	44.3	44.3	44.3	18.431	0	52.378	2937500000	132
HNRNPD	Heterogeneous nuclear ribonucleoprotein D0	Q14103-3;Q14103;Q14103-4;Q14103-2	Q14103-3;Q14103;Q14103-4;Q14103-2			-0.103086	0.391987	-0.288902	-0.270353	0.616505	0.498469	-0.0828164	0.210322	0.147414	0.0775668	-0.0154527	0.499989	0.129592	0.129065	0.247763	6	6	5	25.5	25.5	22.9	32.834	0	87.025	1165100000	70
KTN1	Kinectin	Q86UP2-2;Q86UP2-3;Q86UP2-4;Q86UP2	Q86UP2-2;Q86UP2-3;Q86UP2-4;Q86UP2			-0.102761	0.102761	NaN	NaN	NaN	-0.689206	-0.277444	-0.19291	-0.412959	0.181935	NaN	-0.315759	-0.466857	-0.855283	-0.187259	7	7	7	6.7	6.7	6.7	149.61	0	43.454	250270000	12
RPL35A	60S ribosomal protein L35a	P18077	P18077			-0.102393	-0.215778	0.318171	-0.215501	-0.414827	-0.405494	-0.515245	-0.00732358	0.0932414	-0.0231126	-0.173892	-0.744003	-0.293866	-0.119939	-0.57534	5	5	5	38.2	38.2	38.2	12.538	0	29.679	689360000	47
HNRNPF	Heterogeneous nuclear ribonucleoprotein F;Heterogeneous nuclear ribonucleoprotein F, N-terminally processed	P52597	P52597			-0.101265	0.0904694	0.0107956	-0.0590897	0.900476	0.811609	0.0226498	0.15996	0.0596218	-0.0404282	0.349991	0.302223	0.0038166	0.402388	0.068182	7	7	5	21.7	21.7	15.2	45.671	0	126.37	1668700000	82
DNAJC7	DnaJ homolog subfamily C member 7	Q99615-2;Q99615	Q99615-2;Q99615			-0.099975	-0.147243	0.247218	0.885653	0.882554	0.262129	0.404366	0.483235	0.825921	-0.206128	-0.0689863	-0.0240835	0.139355	0.256215	-0.254899	9	9	9	23.7	23.7	23.7	50.096	0	61.852	526970000	38
RNH1	Ribonuclease inhibitor	P13489	P13489			-0.0995973	-0.162916	0.262513	0.8212	0.475598	0.600671	0.262646	0.222296	-0.00423749	0.292449	-0.267644	0.657344	0.596303	0.499295	0.069924	3	3	3	8.9	8.9	8.9	49.973	0	34.749	593720000	42
FLOT2	Flotillin-2	Q14254	Q14254			-0.0991446	0.172553	-0.0734088	-0.10969	-0.00304667	NaN	0.813266	0.793687	0.929307	0.678912	0.339248	-0.145741	0.16932	0.957595	0.13037	8	8	8	20.1	20.1	20.1	47.064	0	49.765	294590000	36
RPS14	40S ribosomal protein S14	P62263	P62263			-0.0980072	0.0284653	0.0695419	0.263802	0.0663776	-0.0777626	0.0625305	0.0605087	-0.107149	-0.0465469	-0.129692	0.24828	0.315578	0.818064	0.380802	5	5	5	37.1	37.1	37.1	16.273	0	57.798	2757100000	89
ILF3	Interleukin enhancer-binding factor 3	Q12906-5;Q12906-4;Q12906-2;Q12906-6;Q12906-3;Q12906;Q12906-7;Q96SI9-2;Q96SI9	Q12906-5;Q12906-4;Q12906-2;Q12906-6;Q12906-3;Q12906;Q12906-7			-0.0964979	-0.110559	0.207057	-0.0830758	-0.416334	-0.203212	-0.0791734	-0.142984	-0.383834	0.181056	-0.139074	-0.537826	-0.3731	-0.0953782	-0.274129	14	14	14	23.5	23.5	23.5	74.606	0	118.49	1575100000	84
ACTA1;ACTC1;ACTG2;ACTA2	Actin, alpha skeletal muscle;Actin, alpha cardiac muscle 1;Actin, gamma-enteric smooth muscle;Actin, aortic smooth muscle	P68133;P68032;P63267;P62736	P68133;P68032;P63267;P62736			-0.0961927	0.0712115	0.0249812	-0.577007	0.0915515	2.49715	1.56148	-0.0791505	-0.421304	0.0701281	1.43085	0.201895	1.25843	-0.662803	0.248536	13	1	1	31.6	4.2	4.2	42.051	0	17.176	6201600000	45
CKB	Creatine kinase B-type	P12277;P06732	P12277			-0.0959549	0.144793	-0.0488377	0.640495	0.898113	1.01951	-0.0818253	0.131889	0.0797596	0.255938	0.415018	0.479645	0.136444	0.162651	0.594593	16	16	16	61.4	61.4	61.4	42.644	0	236.28	12204000000	280
FLNA	Filamin-A	P21333-2;P21333;Q14315-2;Q14315	P21333-2;P21333			-0.0942008	0.106153	-0.0119521	-0.43224	-0.567521	-0.381735	-0.346305	-0.351065	-0.527804	-0.507952	-0.620604	-0.645655	-0.530186	-0.597457	-0.64659	69	69	63	34.9	34.9	32.9	280.01	0	323.31	14871000000	775
PABPC1;PABPC3	Polyadenylate-binding protein 1;Polyadenylate-binding protein 3	P11940-2;P11940;Q9H361;Q4VXU2;Q4VXU2-2;Q5JQF8;Q96DU9-2;Q96DU9	P11940-2;P11940;Q9H361			-0.0930201	-0.10604	0.19906	0.618001	0.801568	0.830291	0.190986	0.330753	0.525071	0.177492	0.213418	-0.190259	-0.179379	0.306136	0.183263	17	17	11	30.2	30.2	20.1	61.18	0	109.22	1516200000	74
PSAT1	Phosphoserine aminotransferase	Q9Y617;Q9Y617-2	Q9Y617;Q9Y617-2			-0.0929852	0.0854816	0.00750351	1.02677	0.981159	1.12153	0.787783	0.330523	0.457144	0.424606	0.00152016	0.380125	0.641682	0.737347	0.786982	8	8	8	22.7	22.7	22.7	40.422	0	64.818	1158900000	75
QARS	Glutamine--tRNA ligase	P47897-2;P47897	P47897-2;P47897			-0.0921669	0.134932	-0.0427647	-0.30616	-0.500086	0.27389	-0.0689812	0.125908	0.249985	-0.314548	-0.288862	0.0280552	-0.240351	-0.0326576	-0.0467205	18	18	18	27.6	27.6	27.6	86.578	0	131.85	1221700000	111
LRRC59	Leucine-rich repeat-containing protein 59	Q96AG4	Q96AG4			-0.091718	0.134909	-0.0431913	0.119113	0.194222	0.815192	0.251862	0.254609	-0.377328	-0.0859311	-0.0857919	0.193721	0.813027	-0.386897	0.136803	3	3	3	14	14	14	34.93	0	25.025	951930000	28
ALDH18A1	Delta-1-pyrroline-5-carboxylate synthase;Glutamate 5-kinase;Gamma-glutamyl phosphate reductase	P54886-2;P54886	P54886-2;P54886		x	-0.0900745	-0.159245	0.249319	0.413059	-0.134783	0.735172	-0.184097	-0.285004	-0.217289	-0.251156	-0.218987	-0.336107	-0.356167	-0.471695	-0.448309	15	15	15	20.7	20.7	20.7	87.088	0	122.04	1305500000	127
ATP5B	ATP synthase subunit beta, mitochondrial	P06576	P06576			-0.0893033	0.202159	-0.112855	0.132243	NaN	NaN	-0.372121	-0.0102228	-0.684301	-0.498803	0.176169	0.514262	-0.194238	-0.41851	-0.0737851	11	11	11	27	27	27	56.559	0	72.517	468810000	30
DPYSL2	Dihydropyrimidinase-related protein 2	Q16555-2;Q16555;Q14194;Q14194-2	Q16555-2;Q16555			-0.0892245	-0.258876	0.3481	0.967992	0.322797	0.632079	0.286872	0.14582	0.292846	0.437301	-0.00225894	0.467206	0.196702	0.0640844	0.416618	6	6	5	15.5	15.5	14	58.162	0	54.622	526450000	35
CDK1	Cyclin-dependent kinase 1	P06493;P06493-2;P24941-2;P24941;Q00526;P11802-2;P11802;Q00534;Q96Q40-6;Q96Q40-4;Q96Q40-3;O94921-3;Q96Q40-5;Q96Q40;O94921-2;O94921;Q07002;Q07002-3	P06493;P06493-2			-0.0882651	-0.219386	0.307651	0.679796	0.999286	0.399474	0.697835	0.0523446	0.625543	0.626046	0.11024	-0.438899	NaN	-0.142296	0.350549	5	4	4	18.5	15.8	15.8	34.095	0	31.85	363680000	21
PSMB5	Proteasome subunit beta type-5	P28074;P28074-3;P28074-2	P28074;P28074-3			-0.086607	-0.0503139	0.136921	-0.442924	-0.989586	0.360928	0.0994511	-0.0918751	0.136681	-0.0300007	-0.0492783	-0.635468	-0.331078	0.123734	-0.431086	7	7	7	30.8	30.8	30.8	28.48	0	71.277	726310000	81
RPL29	60S ribosomal protein L29	P47914	P47914			-0.0860799	-0.354896	0.440976	-1.33842	-4.53003	-1.07745	-0.598731	-0.236755	-0.654838	0.148839	-0.260852	0.128367	-0.210767	-0.0312227	-0.706647	5	5	5	23.3	23.3	23.3	17.752	0	31.945	3835600000	62
PGK1	Phosphoglycerate kinase 1	P00558;P00558-2;P07205	P00558;P00558-2			-0.0858568	0.123627	-0.0377706	0.491288	0.990815	1.05364	-0.12008	0.00475947	-0.0726255	0.183217	0.307379	0.494471	0.134011	0.0579554	0.273963	18	18	18	49.6	49.6	49.6	44.614	0	204.5	9425400000	240
PSMB6	Proteasome subunit beta type-6	P28072	P28072			-0.0853958	0.0767097	0.00868607	-0.0998783	-0.633091	-2.19294	0.281195	0.402534	0.721661	-0.273396	0.396341	-0.110359	0.656719	-0.0785217	-0.157661	3	3	3	13	13	13	25.357	0	22.917	393260000	34
CLIC1	Chloride intracellular channel protein 1	O00299	O00299			-0.0853297	0.0253576	0.0599721	0.292777	0.508012	0.410978	0.0434316	-0.220412	0.278068	0.333099	0.204568	0.121234	0.371187	0.214881	0.345086	7	7	7	33.2	33.2	33.2	26.922	0	75.292	2467100000	107
ENO1	Alpha-enolase	P06733;P06733-2;P13929-3;P09104-2;P13929-2;P13929;P09104	P06733;P06733-2			-0.0850646	0.0650075	0.020057	0.473255	0.562829	0.842849	-0.147847	-0.0135714	0.0464776	0.0205282	0.0978292	0.323579	0.186797	0.0805868	0.0479101	20	20	20	59.7	59.7	59.7	47.168	0	323.31	25705000000	430
CCT4	T-complex protein 1 subunit delta	P50991;P50991-2	P50991;P50991-2			-0.0836525	0.00677681	0.0768757	0.254026	-0.0553589	0.272524	-0.0172558	-0.0384521	0.0301514	0.0840435	0.0298233	0.307629	0.153168	0.559813	0.252676	17	17	17	39	39	39	57.924	0	161.53	6458200000	212
RPL31	60S ribosomal protein L31	P62899;P62899-3;P62899-2	P62899;P62899-3;P62899-2			-0.0830224	0.494149	-0.411126	-0.556447	-3.38346	-1.98662	-0.655073	0.181386	-0.132987	-0.423339	0.118527	1.1375	-0.444976	-0.684528	-0.609338	7	7	7	52	52	52	14.463	0	79.603	17285000000	143
HNRNPA1;HNRNPA1L2	Heterogeneous nuclear ribonucleoprotein A1;Heterogeneous nuclear ribonucleoprotein A1, N-terminally processed;Heterogeneous nuclear ribonucleoprotein A1-like 2	P09651-3;P09651-2;P09651;Q32P51	P09651-3;P09651-2;P09651;Q32P51			-0.0827141	0.0164528	0.0662613	-0.454241	-0.41374	-0.273817	0.375246	1.09503	0.151972	0.146687	0.202106	0.468067	-0.116419	-0.855631	-0.103592	9	9	9	40.1	40.1	40.1	29.386	0	72.535	1790700000	118
DDX5	Probable ATP-dependent RNA helicase DDX5	P17844-2;P17844	P17844-2;P17844			-0.0825151	-0.16088	0.243395	-0.389806	-0.719657	-0.248203	-0.259855	-0.506185	-0.800403	-0.261926	-0.879077	-0.375062	-0.390249	-0.521098	-0.556915	11	9	9	19.1	15.3	15.3	60.563	0	57.327	790240000	65
SDHB	Succinate dehydrogenase [ubiquinone] iron-sulfur subunit, mitochondrial	P21912	P21912			-0.0824445	0.157153	-0.0747083	0.0691039	-0.48841	0.540585	0.218247	-0.194682	0.359887	0.325591	-0.276918	0.468432	0.0703417	0.582402	-0.129787	4	4	4	15.7	15.7	15.7	31.629	0	25.706	243110000	28
GSPT1;GSPT2	Eukaryotic peptide chain release factor GTP-binding subunit ERF3A;Eukaryotic peptide chain release factor GTP-binding subunit ERF3B	P15170-2;P15170-3;P15170;Q8IYD1	P15170-2;P15170-3;P15170;Q8IYD1			-0.0797049	-0.143025	0.22273	0.259471	-0.667678	-0.432286	0.0414747	0.397632	0.229932	-0.085118	-0.115302	-0.317271	0.196763	0.753639	0.325902	8	8	8	13.7	13.7	13.7	68.6	0	62.05	572750000	79
ALDH16A1	Aldehyde dehydrogenase family 16 member A1	Q8IZ83-3;Q8IZ83	Q8IZ83-3;Q8IZ83		x	-0.0795431	0.0795431	NaN	0.423398	NaN	-0.116689	0.684133	0.634999	0.932817	0.539592	NaN	0.0470896	0.605987	0.946055	0.144368	3	3	3	5.5	5.5	5.5	79.917	0	21.895	147040000	16
DHX9	ATP-dependent RNA helicase A	Q08211;Q08211-2	Q08211			-0.07864	-0.213877	0.292517	0.41189	0.410397	0.405632	0.0902233	-0.132717	-0.214893	0.0936909	-0.219585	0.302181	0.119991	-0.169409	0.243418	19	19	19	16.8	16.8	16.8	140.96	0	142.71	2008300000	173
LUC7L2	Putative RNA-binding protein Luc7-like 2	Q9Y383;Q96HJ9-2;Q9Y383-3;Q9Y383-2	Q9Y383;Q96HJ9-2;Q9Y383-3;Q9Y383-2			-0.0779775	-0.123966	0.201943	-0.841705	-1.38586	-0.989509	-0.270906	-0.632081	-0.683061	-0.714563	-0.623399	-1.11388	-0.748506	-1.13403	-0.747369	9	9	6	24	24	16.3	46.513	0	96.22	676310000	80
SNRNP200	U5 small nuclear ribonucleoprotein 200 kDa helicase	O75643;O75643-2	O75643			-0.0777308	-0.113858	0.191589	-0.0472838	-0.79048	0.029302	0.000794729	-0.0846621	-0.445317	-0.174031	-0.447224	-0.446271	-0.546136	-0.800202	-0.307727	14	14	14	7	7	7	244.5	0	96.662	659400000	61
PGM1	Phosphoglucomutase-1	P36871;P36871-2;P36871-3	P36871;P36871-2;P36871-3			-0.0757751	-0.0241261	0.0999012	-0.0131264	0.522297	0.511335	-0.0720558	0.12422	0.321373	-0.0605068	0.0128994	0.16345	-0.205101	-0.217472	0.31127	11	11	11	19.8	19.8	19.8	61.448	0	74.272	506020000	70
BZW2	Basic leucine zipper and W2 domain-containing protein 2	Q9Y6E2;Q9Y6E2-2	Q9Y6E2			-0.075757	NaN	0.075757	-0.025527	NaN	NaN	0.298034	1.28139	0.574967	0.233199	0.372937	-0.0855494	-0.126332	NaN	-0.577342	3	2	2	6.4	4.8	4.8	48.162	0	13.307	74484000	5
TWF1	Twinfilin-1	Q12792;Q12792-4;Q12792-3	Q12792;Q12792-4;Q12792-3			-0.0751991	0.0443668	0.0308323	-0.167284	-0.840618	NaN	0.085434	0.364454	0.222158	-0.145264	NaN	NaN	-0.321789	NaN	-0.363531	3	3	3	9.7	9.7	9.7	40.282	0	19.243	77280000	9
HPRT1	Hypoxanthine-guanine phosphoribosyltransferase	P00492;Q9NRG1-2;Q9NRG1	P00492			-0.0735098	-0.235434	0.308944	0.70259	1.2059	1.64014	0.233733	0.184814	0.339008	0.446952	0.500259	0.0988153	-0.046622	0.255185	0.772374	6	6	6	29.8	29.8	29.8	24.579	0	54.3	1069000000	75
LDHB	L-lactate dehydrogenase B chain	P07195	P07195			-0.0734151	0.03777	0.0356452	0.928603	0.690455	0.483481	0.815179	0.718903	0.893849	0.502139	0.569689	0.409564	0.778197	0.954873	0.860085	17	17	16	42.8	42.8	39.2	36.638	0	297.68	32775000000	320
ARCN1	Coatomer subunit delta	P48444;P48444-2	P48444;P48444-2			-0.070851	-0.24965	0.320501	0.0447343	0.482927	0.845926	0.228078	0.382886	0.25016	-0.28513	-0.118359	-0.154605	0.275718	-0.189154	0.406818	9	9	9	19	19	19	57.21	0	70.546	554590000	79
GMPS	GMP synthase [glutamine-hydrolyzing]	P49915;P49915-2	P49915;P49915-2			-0.0705783	-0.173047	0.243625	0.93567	0.960986	0.935926	0.278459	0.720023	0.493095	0.0601476	0.219833	0.399148	0.951597	0.309509	0.409088	9	9	9	14.4	14.4	14.4	76.715	0	63.681	666800000	64
LARS	Leucine--tRNA ligase, cytoplasmic	Q9P2J5;Q9P2J5-2;Q9P2J5-3	Q9P2J5;Q9P2J5-2			-0.0703271	0.308816	-0.238489	0.183165	0.650555	0.607459	-0.0738309	-0.00977834	-0.181581	-0.0907663	-0.150579	0.0685813	0.0693328	0.16458	0.112174	8	8	8	7.5	7.5	7.5	134.46	0	51.894	719260000	59
ATP5A1	ATP synthase subunit alpha, mitochondrial	P25705;P25705-2;P25705-3	P25705;P25705-2;P25705-3			-0.0697346	0.0460892	0.0236454	0.897493	0.680893	0.79612	0.317085	0.135426	0.370466	0.407515	0.0553436	0.0374641	0.639364	0.804394	0.696762	21	21	21	44.1	44.1	44.1	59.75	0	241.94	8993000000	264
MYH9	Myosin-9	P35579;P35579-2	P35579;P35579-2			-0.0686366	0.0682138	0.000422796	-0.0768878	0.390745	-0.21593	-0.805764	-0.72824	-1.13111	-0.541039	-0.916398	-1.04396	-1.00162	-0.767884	-0.991755	42	42	33	26.5	26.5	21.4	226.53	0	323.31	4148500000	283
SRRM2	Serine/arginine repetitive matrix protein 2	Q9UQ35;Q9UQ35-2;Q9UQ35-3	Q9UQ35;Q9UQ35-2			-0.0680447	-0.337532	0.405577	-1.72552	-0.896353	-0.663813	-0.864	-1.84473	-1.10272	-0.231993	-1.36229	-1.46628	-1.14234	-0.751013	-0.982691	76	76	76	35.4	35.4	35.4	299.61	0	323.31	37055000000	1057
RPL5	60S ribosomal protein L5	P46777	P46777			-0.0672576	0.0326818	0.0345758	0.0609086	-0.238986	-0.377991	-0.0984408	0.143964	0.0211633	-0.0358607	-0.437657	0.275161	-0.302441	0.069629	-0.211907	8	8	8	25.6	25.6	25.6	34.362	0	57.774	1534600000	80
P4HB	Protein disulfide-isomerase	P07237	P07237			-0.0664539	0.059597	0.00685692	0.656418	0.552113	0.297747	0.646786	0.684717	0.52573	0.320864	0.466927	0.468218	0.781792	0.73476	0.662712	22	22	22	41.9	41.9	41.9	57.116	0	195.35	6673200000	274
RAC1;RAC3;RAC2	Ras-related C3 botulinum toxin substrate 1;Ras-related C3 botulinum toxin substrate 3;Ras-related C3 botulinum toxin substrate 2	P63000;P63000-2;P60763;P15153	P63000;P63000-2;P60763;P15153			-0.066424	-0.07429	0.140714	0.584329	NaN	0.563947	NaN	0.00059255	-0.172103	-0.128358	0.134654	-0.227437	0.0138582	0.188344	-0.138314	2	2	2	11.5	11.5	11.5	21.45	0	12.419	635840000	25
ECM29	Proteasome-associated protein ECM29 homolog	Q5VYK3	Q5VYK3			-0.0656465	0.0872389	-0.0215925	-0.425254	0.482728	NaN	0.311457	0.24611	0.590598	-0.00906881	0.296458	0.164305	0.111657	-0.570848	-0.0562375	10	10	10	6	6	6	204.29	0	62.864	261280000	26
IPO7	Importin-7	O95373	O95373			-0.065136	0.375534	-0.310398	0.387386	1.15886	0.942188	-0.0277176	0.100006	0.349167	0.56498	0.27566	0.397171	0.273554	0.0274429	0.3479	8	8	8	9.7	9.7	9.7	119.52	0	65.808	990860000	66
RPA1	Replication protein A 70 kDa DNA-binding subunit;Replication protein A 70 kDa DNA-binding subunit, N-terminally processed	P27694	P27694			-0.0651048	0.191386	-0.126281	0.0216452	NaN	-0.533136	0.450055	0.744166	0.930535	-0.0884813	0.237883	0.237019	0.199631	NaN	-1.11072	6	6	6	11.4	11.4	11.4	68.137	0	40.318	240450000	28
2020-09-02	Septin-2	Q15019;Q15019-3;Q15019-2	Q15019;Q15019-3;Q15019-2			-0.0650241	0.10366	-0.0386359	0.200933	-0.0523135	-0.00600306	-0.0739276	-0.0530059	0.20433	0.112682	-0.352603	-0.535369	-0.0251834	-0.00571505	-0.265326	3	3	3	8.9	8.9	8.9	41.487	0	18.286	396990000	23
KPNA2	Importin subunit alpha-1	P52292	P52292			-0.0644855	-0.0681362	0.132622	-0.0727177	-0.234716	-0.0611057	-0.391148	-0.633007	-0.53853	-0.128868	-0.340649	-0.110252	-0.563137	-0.383917	-0.289528	11	11	11	26.5	26.5	26.5	57.861	0	109.88	1858700000	126
ALDH5A1	Succinate-semialdehyde dehydrogenase, mitochondrial	P51649;P51649-2	P51649;P51649-2		x	-0.064113	0.112521	-0.0484079	-0.0382646	NaN	0.0471789	0.167954	0.438796	0.196118	-0.192918	-0.0956319	-0.14153	NaN	0.401313	0.540198	2	2	2	3.9	3.9	3.9	57.214	0	14.112	128660000	11
HINT1	Histidine triad nucleotide-binding protein 1	P49773	P49773			-0.0640405	0.0182749	0.0457656	0.131772	NaN	-0.233396	0.132054	0.688689	0.479685	0.0442588	-0.150853	0.0756365	NaN	0.288607	0.571387	4	4	4	35.7	35.7	35.7	13.802	0	22.673	720840000	22
HARS	Histidine--tRNA ligase, cytoplasmic	P12081-3;P12081-2;P12081-4;P12081;P49590-2;P49590	P12081-3;P12081-2;P12081-4;P12081			-0.0634174	0.223413	-0.159996	0.436131	0.429356	0.363899	-0.334812	-0.0534878	-0.450487	0.100742	-0.0235672	-0.142345	0.111988	0.127338	0.116693	12	12	12	28.5	28.5	28.5	50.156	0	102.94	938790000	84
HADHA	Trifunctional enzyme subunit alpha, mitochondrial;Long-chain enoyl-CoA hydratase;Long chain 3-hydroxyacyl-CoA dehydrogenase	P40939	P40939			-0.0630875	0.0502148	0.0128727	0.650768	0.0115471	0.666723	0.580231	0.544127	0.436413	0.419872	0.0503826	0.132349	0.603182	0.658468	0.730421	15	15	15	25.7	25.7	25.7	82.999	0	109.61	1269800000	111
MSH6	DNA mismatch repair protein Msh6	P52701-3;P52701;P52701-4;P52701-2	P52701-3;P52701;P52701-4;P52701-2			-0.0622911	NaN	0.0622911	NaN	0.38214	NaN	-0.157664	0.26352	0.202203	0.260545	0.395003	-0.00671101	0.387496	NaN	NaN	6	6	6	5	5	5	137.96	0	35.838	262000000	9
PAFAH1B1	Platelet-activating factor acetylhydrolase IB subunit alpha	P43034;P43034-2	P43034			-0.0617415	0.229125	-0.167384	0.0691293	-1.04887	-0.384307	0.387584	0.0869478	0.107099	0.0589193	-0.386298	-0.152842	0.465415	0.417426	-0.277674	4	4	4	12.7	12.7	12.7	46.637	0	27.844	413590000	45
PGD	6-phosphogluconate dehydrogenase, decarboxylating	P52209-2;P52209	P52209-2;P52209			-0.0616385	-0.100247	0.161886	0.632135	0.85172	1.00594	0.351493	0.105058	0.0155118	0.239311	-0.0232741	0.179921	0.576694	0.0523828	0.768003	12	12	12	31.7	31.7	31.7	51.872	0	90.234	2861500000	127
PSMB1	Proteasome subunit beta type-1	P20618	P20618			-0.0608749	0.148661	-0.0877857	0.449987	-0.036005	0.412954	-0.321516	-0.0508575	0.162502	0.0452595	-0.411606	-0.366615	-0.0607014	0.0463142	0.646238	4	4	4	17.4	17.4	17.4	26.489	0	27.149	506900000	41
PRDX6	Peroxiredoxin-6	P30041	P30041			-0.0605354	0.290701	-0.230165	0.514187	0.757149	1.17011	-0.266367	-0.0458336	-0.207066	0.127947	0.0793171	-0.0912075	0.121681	0.140053	0.151262	12	12	12	61.2	61.2	61.2	25.035	0	101.53	3641000000	147
GOT1	Aspartate aminotransferase, cytoplasmic	P17174;P17174-2	P17174;P17174-2			-0.0601807	-0.115654	0.175835	0.676075	0.503599	0.824844	0.459661	0.415716	0.660393	0.369781	0.455612	0.2453	0.843155	0.89011	0.970253	10	10	10	31.7	31.7	31.7	46.247	0	68.335	866130000	63
TOMM40	Mitochondrial import receptor subunit TOM40 homolog	O96008;O96008-2	O96008;O96008-2			-0.0599944	0.261012	-0.201018	1.66565	1.99092	2.00728	1.53283	1.39099	1.61758	2.33998	1.73068	1.49679	1.68541	1.41798	1.95776	6	6	6	26	26	26	37.893	0	108.97	2466300000	91
RPS3A	40S ribosomal protein S3a	P61247	P61247			-0.0591768	-0.0297597	0.0889365	-0.0770391	-0.0853208	-0.625589	0.115063	0.224492	0.276301	0.100533	-0.370256	-0.197353	-0.170991	0.208689	-0.193391	13	13	13	48.1	48.1	48.1	29.945	0	92.193	2896600000	118
HYOU1	Hypoxia up-regulated protein 1	Q9Y4L1;Q9Y4L1-2	Q9Y4L1;Q9Y4L1-2			-0.0573057	0.15331	-0.0960039	-0.25341	-0.953653	0.341113	0.205729	0.124179	0.240336	0.197373	0.371522	0.433137	0.389041	0.319087	0.455521	4	4	4	5.1	5.1	5.1	111.33	0	26.561	274220000	37
MDH2	Malate dehydrogenase, mitochondrial	P40926;P40926-2	P40926;P40926-2			-0.0568034	0.171386	-0.114583	0.565877	0.318458	0.593408	-0.281432	0.0918554	0.00988706	0.118579	0.192382	0.712415	0.0846723	-0.272675	0.331832	14	14	14	50.6	50.6	50.6	35.503	0	136.95	5468600000	207
LTA4H	Leukotriene A-4 hydrolase	P09960;P09960-4;P09960-2;P09960-3	P09960;P09960-4;P09960-2;P09960-3			-0.0561701	-0.0408885	0.0970586	0.718704	0.784322	1.12695	0.282016	0.317008	0.0775808	0.254661	0.255203	0.279701	0.0102495	0.426195	0.453487	13	13	13	25.4	25.4	25.4	69.284	0	103.57	1548400000	124
MAT2A	S-adenosylmethionine synthase isoform type-2	P31153;P31153-2;Q00266	P31153;P31153-2			-0.0560919	-0.0130889	0.0691808	0.824287	1.38999	0.686347	0.53209	0.409221	0.079759	0.000748952	0.0627836	0.100183	0.639919	0.513175	0.265766	7	7	7	19.5	19.5	19.5	43.66	0	50.991	1271600000	62
TIMM50	Mitochondrial import inner membrane translocase subunit TIM50	Q3ZCQ8;Q3ZCQ8-2;Q3ZCQ8-3	Q3ZCQ8;Q3ZCQ8-2;Q3ZCQ8-3			-0.0556577	-0.150029	0.205687	1.28604	1.71349	1.4957	0.647175	1.0753	1.44942	0.29066	0.841471	0.640031	1.17988	0.701657	1.09232	5	5	5	20.4	20.4	20.4	39.646	0	45.182	629820000	50
ESYT1	Extended synaptotagmin-1	Q9BSJ8;Q9BSJ8-2	Q9BSJ8;Q9BSJ8-2			-0.0549278	NaN	0.0549278	-0.0345821	0.46419	0.436972	-0.350458	-0.585178	-0.827045	0.472641	0.0763321	0.0897675	0.198988	0.473148	0.199234	5	5	5	5.5	5.5	5.5	122.85	0	35.234	295370000	31
ANXA7	Annexin A7	P20073-2;P20073	P20073-2;P20073			-0.054904	0.054904	NaN	0.652171	0.550109	0.221208	NaN	0.314349	0.0793142	-0.235875	0.80403	NaN	0.150788	NaN	NaN	3	3	3	7.3	7.3	7.3	50.315	0	17.519	160770000	10
IPO4	Importin-4	Q8TEX9;Q8TEX9-2	Q8TEX9;Q8TEX9-2			-0.0540714	0.0540714	NaN	0.663727	1.22532	NaN	0.412249	-0.464504	-0.32091	-0.495829	0.0780487	0.305323	NaN	0.253069	0.383856	2	2	2	2.4	2.4	2.4	118.71	0	13.013	179950000	11
EIF3A	Eukaryotic translation initiation factor 3 subunit A	Q14152-2;Q14152	Q14152-2;Q14152			-0.0535329	-0.00562032	0.0591532	0.336835	0.367865	0.593922	-0.448514	-0.134111	-0.364566	-0.181768	-0.434585	-0.135534	-0.333131	-0.423583	0.39803	10	10	10	7.6	7.6	7.6	162.63	0	65.278	684280000	66
PGM3	Phosphoacetylglucosamine mutase	O95394;O95394-3;O95394-4	O95394;O95394-3;O95394-4			-0.0534821	0.0984917	-0.0450096	-0.270016	-0.497946	NaN	0.325315	0.64934	0.203613	-0.0215778	-0.102951	0.318895	-0.360258	-0.389744	-0.136761	5	5	5	8.7	8.7	8.7	59.851	0	28.762	266120000	31
U2AF2	Splicing factor U2AF 65 kDa subunit	P26368-2;P26368	P26368-2;P26368			-0.0533415	0.222715	-0.169373	0.612466	1.32095	1.44379	-0.361056	0.743038	NaN	0.398231	0.405113	1.11875	0.335061	NaN	0.632449	5	5	5	16.3	16.3	16.3	53.12	0	38.25	429640000	21
2020-09-09	Septin-9	Q9UHD8-7;Q9UHD8-2;Q9UHD8-5;Q9UHD8;Q9UHD8-3;Q9UHD8-4;Q9UHD8-9;Q9UHD8-8	Q9UHD8-7;Q9UHD8-2;Q9UHD8-5;Q9UHD8;Q9UHD8-3;Q9UHD8-4;Q9UHD8-9;Q9UHD8-8			-0.052283	-0.233432	0.285714	1.04576	0.256231	NaN	0.578203	0.534658	0.464134	0.347036	-0.0759608	-0.0562483	0.525523	0.358791	0.639591	9	9	9	18.2	18.2	18.2	63.502	0	59.488	598600000	54
TCOF1	Treacle protein	Q13428-2;Q13428-8;Q13428;Q13428-3;Q13428-4;Q13428-6;Q13428-7	Q13428-2;Q13428-8;Q13428;Q13428-3;Q13428-4;Q13428-6;Q13428-7			-0.0511112	-0.0857506	0.136862	-0.330013	NaN	NaN	-0.380278	-0.087986	-0.361855	-0.29097	-0.35475	-0.093771	-0.443697	NaN	-0.17592	6	6	6	5.1	5.1	5.1	144.31	0	41.991	259130000	27
RANGAP1	Ran GTPase-activating protein 1	P46060	P46060			-0.0506026	0.0670656	-0.016463	-0.312522	-0.744298	-0.816342	-0.631423	-0.407473	-0.385424	-0.179883	-0.724106	-1.14865	-0.477372	-0.109519	-0.251454	10	10	10	20.4	20.4	20.4	63.541	0	86.037	1210700000	109
RPS9	40S ribosomal protein S9	P46781	P46781			-0.0488981	0.00763957	0.0412585	-0.355966	-0.734517	0.10209	-0.414491	-1.26114	-0.732801	-0.593046	-0.675048	-0.364797	-0.542486	-0.428991	-0.293384	15	15	15	50	50	50	22.591	0	121.32	28490000000	275
MCCC1	Methylcrotonoyl-CoA carboxylase subunit alpha, mitochondrial	Q96RQ3	Q96RQ3			-0.0487804	-0.128708	0.177488	-0.99139	-0.210297	-0.290541	-0.993296	-1.3189	-1.40784	-1.05371	-1.3162	-1.77932	-1.76945	-1.61485	-1.45425	26	26	26	45.9	45.9	45.9	80.472	0	323.31	19531000000	460
MARS	Methionine--tRNA ligase, cytoplasmic	P56192;P56192-2	P56192;P56192-2			-0.0487397	-0.0320733	0.0808131	-0.0724424	0.267518	0.397292	0.395053	0.48095	0.184085	0.0355364	-0.129546	0.107627	-0.442123	-0.576997	-0.104894	9	9	9	12.1	12.1	12.1	101.11	0	62.368	571010000	45
PRKDC	DNA-dependent protein kinase catalytic subunit	P78527;P78527-2	P78527;P78527-2			-0.0475769	0.0354309	0.012146	0.315655	0.378101	0.274525	0.104786	0.266256	-0.138031	0.027317	-0.0575466	-0.0106716	0.117359	0.144571	0.0967178	48	48	48	12.3	12.3	12.3	469.08	0	323.31	3608700000	323
IRS4	Insulin receptor substrate 4	O14654	O14654			-0.0473817	-0.178869	0.22625	0.250695	-0.203819	0.307976	0.470755	0.364981	0.369792	0.654425	0.0152861	-0.491353	0.486001	0.684052	0.630221	14	14	14	12.8	12.8	12.8	133.77	0	101.29	884930000	68
PPM1G	Protein phosphatase 1G	O15355	O15355			-0.0469513	0.104723	-0.0577717	-0.673883	-0.174032	-0.66538	0.424135	0.697489	0.51351	0.484541	0.03825	-0.080286	-0.482876	0.681715	-0.498373	8	8	8	19.4	19.4	19.4	59.271	0	54.342	429630000	48
DDB1	DNA damage-binding protein 1	Q16531;Q16531-2	Q16531			-0.0468013	0.0262197	0.0205816	0.397451	0.537948	0.776101	0.0141881	0.172221	-0.0877158	0.0981744	0.0136102	0.415176	0.496269	-0.0124137	0.408048	19	19	19	15.9	15.9	15.9	126.97	0	124.1	2345700000	104
TYMS	Thymidylate synthase	P04818;P04818-2;P04818-3	P04818;P04818-2;P04818-3			-0.0455214	-0.173474	0.218995	1.18085	0.81804	1.29059	1.00327	1.02547	0.79615	1.05941	0.577245	0.543685	0.986757	0.0806516	0.797962	6	6	6	25.2	25.2	25.2	35.716	0	44.27	764260000	45
CAPZB	F-actin-capping protein subunit beta	P47756-2;P47756	P47756-2;P47756			-0.0452957	-0.0374928	0.0827885	0.332148	-0.29764	0.22353	0.145489	0.317129	0.128212	0.107126	0.205046	-0.113396	0.0187645	0.266562	0.539209	9	9	9	32.4	32.4	32.4	30.628	0	58.544	1672900000	106
MTA2	Metastasis-associated protein MTA2	O94776;O94776-2;Q13330-2;Q9BTC8-2;Q9BTC8;Q13330-3;Q13330	O94776;O94776-2			-0.0450172	0.146488	-0.101471	0.0943108	0.237535	NaN	0.33383	0.0676022	0.438635	-0.214231	-0.195719	-0.632933	-0.452116	NaN	-0.592627	3	3	3	5.4	5.4	5.4	75.022	0	18.789	150170000	21
PSMD11	26S proteasome non-ATPase regulatory subunit 11	O00231;O00231-2	O00231;O00231-2			-0.0448214	0.117669	-0.072848	0.423864	0.364351	0.728921	0.254924	-0.122121	0.0077699	0.407104	0.464717	0.59423	0.117456	0.481599	0.361379	9	9	9	23.2	23.2	23.2	47.463	0	74.493	1187000000	117
UQCRC1	Cytochrome b-c1 complex subunit 1, mitochondrial	P31930	P31930			-0.0443376	-0.0196451	0.0639826	0.246577	0.410241	0.223353	0.159482	0.322608	0.471182	0.097552	-0.24538	0.488328	0.289529	0.544301	0.770116	10	10	10	27.5	27.5	27.5	52.645	0	87.522	1196100000	69
CHORDC1	Cysteine and histidine-rich domain-containing protein 1	Q9UHD1-2;Q9UHD1	Q9UHD1-2;Q9UHD1			-0.0440305	0.0712172	-0.0271867	0.453478	-0.314428	0.174191	0.196212	0.259972	0.154175	-0.311975	-0.0062116	0.141699	0.151511	-0.0403264	0.574021	7	7	7	30.4	30.4	30.4	35.286	0	50.153	644960000	36
HNRNPU	Heterogeneous nuclear ribonucleoprotein U	Q00839;Q00839-2	Q00839;Q00839-2			-0.0437438	0.125367	-0.0816237	0.316146	0.315397	-0.152589	0.160335	0.112626	-0.0753066	0.166929	0.14266	0.265563	-0.160611	-0.0812289	-0.327469	16	16	16	22.1	22.1	22.1	90.583	0	168.66	4244400000	156
RPL12	60S ribosomal protein L12	P30050;P30050-2	P30050;P30050-2			-0.0436974	-0.0431404	0.0868378	1.09004	0.723503	0.781017	0.209593	0.0545502	0.121832	0.478634	0.359371	0.463951	0.191113	0.600695	0.530075	5	5	5	33.9	33.9	33.9	17.818	0	43.571	2016900000	68
DDX46	Probable ATP-dependent RNA helicase DDX46	Q7L014	Q7L014			-0.0407702	0.211913	-0.171143	-0.60463	-1.48334	-0.969336	-0.512431	0.293659	-0.693881	-0.260628	-0.536702	-0.244803	-0.400611	-0.686387	-0.474906	24	24	24	25.1	25.1	25.1	117.36	0	204.06	2455400000	183
UBA2	SUMO-activating enzyme subunit 2	Q9UBT2;Q9UBT2-2	Q9UBT2;Q9UBT2-2			-0.0397339	-0.157719	0.197453	0.606289	0.872538	0.599663	0.395836	0.380964	0.464619	0.312952	-0.00965118	-0.178049	-0.0290203	0.242918	0.644287	10	10	10	18.9	18.9	18.9	71.223	0	66.901	1114100000	78
TKT	Transketolase	P29401;P29401-2	P29401;P29401-2			-0.0392462	-0.0151107	0.0543569	0.333917	0.0423578	0.0609258	0.126132	0.449622	0.28783	0.33319	0.143148	0.177526	0.17846	0.425733	0.104657	18	18	18	32.1	32.1	32.1	67.877	0	152.03	6570100000	236
CS	Citrate synthase, mitochondrial	O75390	O75390			-0.0389194	-0.202421	0.241341	0.363987	0.541161	0.561775	0.0738926	-0.270861	-0.513439	0.267551	0.0816898	-0.167271	0.131357	0.306984	0.179523	8	8	8	17.4	17.4	17.4	51.712	0	54.611	1611900000	95
ACSL3	Long-chain-fatty-acid--CoA ligase 3	O95573;O60488-2;O60488	O95573			-0.0386238	-0.050457	0.0890808	0.111637	NaN	NaN	0.170874	0.419123	0.463663	-0.00996399	0.10943	0.0362587	0.0657425	-0.182381	-0.184444	5	5	5	9.3	9.3	9.3	80.419	0	32.152	207310000	12
YWHAQ	14-3-3 protein theta	P27348	P27348			-0.0378857	0.117142	-0.0792561	-0.0678616	-0.0759468	-0.173712	-0.306112	-0.335489	-0.0375023	0.0371685	-0.191765	-0.0316906	0.128183	-0.31398	-0.168667	12	10	9	46.1	38.8	35.1	27.764	0	247.12	4585800000	103
ALDH7A1	Alpha-aminoadipic semialdehyde dehydrogenase	P49419-2;P49419;P49419-4	P49419-2;P49419;P49419-4		x	-0.0377579	-0.00401688	0.0417747	0.596722	-0.0731182	-0.193274	0.261934	0.436565	0.207037	0.365797	0.531723	0.0632629	0.0201054	0.16073	0.285662	11	11	11	26	26	26	55.366	0	71.55	958190000	37
SLC25A5	ADP/ATP translocase 2;ADP/ATP translocase 2, N-terminally processed	P05141;Q9H0C2	P05141			-0.0366147	0.119765	-0.0831502	0.739497	0.569497	0.467347	0.607167	0.487069	0.369656	0.586528	0.262133	0.485791	0.687487	0.67681	0.550549	12	12	4	35.2	35.2	14.4	32.852	0	91.33	8945800000	201
SSRP1	FACT complex subunit SSRP1	Q08945	Q08945			-0.0357272	0.157104	-0.121377	0.769595	0.809886	1.17283	0.123626	0.0459607	-0.411151	0.0564683	0.0888074	0.251659	-0.0350348	0.126275	0.565994	4	4	4	7.1	7.1	7.1	81.074	0	47.029	459820000	40
ATP1A1	Sodium/potassium-transporting ATPase subunit alpha-1	P05023-4;P05023;P05023-3;P05023-2;P13637;P50993;P13637-2;P13637-3;Q13733;P20648;P54707;P54707-2	P05023-4;P05023;P05023-3;P05023-2			-0.0347462	0.0123444	0.0224018	0.451252	0.491776	0.641813	0.239044	0.125561	0.239758	0.247999	0.499863	0.464586	0.280344	0.200897	0.181292	18	18	18	18.7	18.7	18.7	113	0	214.22	2229500000	133
SLC25A3	Phosphate carrier protein, mitochondrial	Q00325-2;Q00325	Q00325-2;Q00325			-0.0342776	-0.30609	0.340368	-0.018603	0.374854	0.380428	0.400441	0.153922	0.532079	0.277521	0.413957	0.221952	0.326787	-0.980113	0.714397	7	7	7	20.8	20.8	20.8	39.958	0	55.526	1578700000	64
PSMA7	Proteasome subunit alpha type-7	O14818;O14818-2;O14818-4;Q8TAA3-2;Q8TAA3-5;Q8TAA3	O14818;O14818-2			-0.0337315	-0.0231781	0.0569096	0.483654	-0.0758648	0.7952	0.0758896	0.360983	0.660852	0.423622	0.306181	0.570976	0.209661	-0.159548	0.3507	4	4	4	17.3	17.3	17.3	27.887	0	27.111	514420000	25
FABP5	Fatty acid-binding protein, epidermal	Q01469	Q01469			-0.0326214	0.400084	-0.367462	0.262873	-1.55853	NaN	-0.708996	0.0738277	-0.0934906	-0.588438	-0.111929	-0.0523891	-0.941463	-0.661934	-0.229397	3	3	3	20	20	20	15.164	0	20.272	221930000	25
RPL15	60S ribosomal protein L15	P61313;P61313-2	P61313			-0.0325896	0.0630544	-0.0304648	-0.79901	-0.815135	-0.674811	-0.367638	-0.613772	-0.669892	-1.01684	-0.512082	-0.544219	-0.486888	-0.284653	-0.507033	14	14	14	50	50	50	24.146	0	179.64	13318000000	244
CPNE3	Copine-3	O75131;Q86YQ8-2;Q9HCH3-2;Q96FN4-2;Q96FN4;Q8IYJ1;Q96A23;O95741;Q9UBL6-2;Q86YQ8;Q96A23-2;Q9HCH3;O95741-2;Q9UBL6	O75131			-0.0321115	0.0386511	-0.00653966	1.27807	1.23441	0.836138	0.196551	0.590018	-0.36643	0.0289961	0.189431	0.520629	0.323239	0.133818	0.705186	5	5	5	8.8	8.8	8.8	60.13	0	32.35	460230000	40
PRPS2	Ribose-phosphate pyrophosphokinase 2	P11908;P11908-2	P11908;P11908-2			-0.0318063	0.207032	-0.175226	0.390181	1.2774	0.694714	0.267251	-0.0446657	0.159011	-0.0550035	-0.222057	-0.228683	0.795994	0.196753	0.712611	7	7	2	25.2	25.2	7.9	34.769	0	49.25	892050000	55
PCBP1;PCBP3	Poly(rC)-binding protein 1;Poly(rC)-binding protein 3	Q15365;P57721-2;P57721-3;P57721-5;P57721-4;P57721;P57723-2;P57723	Q15365;P57721-2;P57721-3;P57721-5;P57721-4;P57721			-0.0314846	-0.173941	0.205425	0.506264	-0.0942707	0.149042	0.357866	0.457973	0.436342	0.337439	0.373127	0.056242	0.0922279	0.635963	0.214706	8	8	4	26.4	26.4	13.2	37.497	0	65.245	1867400000	87
PSMA3	Proteasome subunit alpha type-3	P25788-2;P25788	P25788-2;P25788			-0.0309496	0.0309496	NaN	0.839002	0.290708	NaN	NaN	0.018136	NaN	0.56627	0.0577059	0.543328	0.151622	0.580026	-0.325725	5	5	5	23.8	23.8	23.8	27.647	0	36.603	404160000	35
RPL13A;RPL13AP3	60S ribosomal protein L13a;Putative 60S ribosomal protein L13a protein RPL13AP3	P40429;Q6NVV1	P40429;Q6NVV1			-0.0306466	-0.512014	0.54266	-1.41914	0.197104	0.000557582	-0.735374	-1.5382	-1.3759	-0.970458	-1.44998	-1.6213	-1.17471	-0.34284	-0.879216	9	9	9	33.5	33.5	33.5	23.577	0	82.043	16176000000	225
THOP1	Thimet oligopeptidase	P52888;P52888-2	P52888;P52888-2			-0.030091	0.0802854	-0.0501944	0.639453	NaN	0.227624	0.835182	0.343025	-0.0316226	0.0844797	NaN	NaN	0.0259851	0.608985	0.397651	4	4	4	7.5	7.5	7.5	78.839	0	25.739	257900000	10
PHB	Prohibitin	P35232;P35232-2	P35232;P35232-2			-0.0296459	-0.22414	0.253786	0.91667	1.13084	1.42319	0.670687	-0.052206	0.129934	0.385996	0.596092	-0.212095	0.104345	0.505573	0.382372	10	10	10	38.2	38.2	38.2	29.804	0	92.336	2127900000	110
ETFB	Electron transfer flavoprotein subunit beta	P38117;P38117-2	P38117;P38117-2			-0.0285746	-0.051089	0.0796636	-0.0982176	0.24525	0.399886	-0.403815	-0.41566	-0.185601	-0.0410792	-0.571723	-0.155303	-0.451552	-0.013991	-0.300946	7	7	7	28.6	28.6	28.6	27.843	0	43.919	436130000	18
CSDE1	Cold shock domain-containing protein E1	O75534-2;O75534;O75534-3;O75534-4	O75534-2;O75534;O75534-3;O75534-4			-0.0263901	-0.00244331	0.0288334	-0.573463	NaN	0.138552	-0.00747299	-0.184515	-0.268915	-0.188213	-0.143385	0.0211105	-0.186749	0.0397453	-0.101505	8	8	8	12.4	12.4	12.4	85.746	0	55.623	515320000	54
PABPC4	Polyadenylate-binding protein 4	Q13310-2;Q13310;Q13310-3;P0CB38	Q13310-2;Q13310;Q13310-3			-0.0230904	0.06674	-0.0436497	0.706398	0.0897484	0.67066	0.0317764	-0.254869	0.1257	0.122128	NaN	0.171467	0.0633125	0.423187	0.269697	12	6	6	17.9	9.2	9.2	69.578	0	41.994	394960000	24
ADSS	Adenylosuccinate synthetase isozyme 2	P30520	P30520			-0.0228418	-0.0940984	0.11694	0.392773	0.901053	1.22229	0.144356	0.683165	-0.262201	0.919577	0.323039	0.628817	0.699687	NaN	0.510382	5	5	5	14.7	14.7	14.7	50.097	0	37.309	415020000	32
PRDX3	Thioredoxin-dependent peroxide reductase, mitochondrial	P30048-2;P30048	P30048-2;P30048			-0.0223026	0.150799	-0.128496	0.405849	1.01472	1.06681	0.125092	0.478052	0.524435	0.0965462	0.346645	0.56735	0.357628	0.655375	0.346224	6	6	6	26.1	26.1	26.1	25.838	0	59.448	1492500000	111
DEK	Protein DEK	P35659-2;P35659	P35659-2;P35659			-0.021616	-0.0425186	0.0641346	-0.271091	NaN	NaN	0.103086	0.0631275	0.148981	0.243126	0.0345287	-0.202477	NaN	NaN	-0.2596	2	2	2	6.5	6.5	6.5	38.704	0.00088417	11.681	119650000	18
SRSF6	Serine/arginine-rich splicing factor 6	Q13247-3;Q13247;Q13247-2	Q13247-3;Q13247			-0.0208937	-0.227286	0.24818	-0.763913	-0.75528	-1.04411	-0.476447	-0.482438	-0.845801	-0.38057	-0.702979	-1.41543	-0.944604	NaN	-0.774022	6	6	3	15.8	15.8	6	38.418	0	75.422	802310000	64
ESD	S-formylglutathione hydrolase	P10768	P10768			-0.0207202	0.157655	-0.136935	NaN	NaN	0.237815	0.586673	0.634639	0.327636	0.0373529	-0.116986	0.0870012	0.859168	0.295789	0.818122	2	2	2	12.1	12.1	12.1	31.462	0	18.224	276020000	29
AHCY	Adenosylhomocysteinase	P23526;P23526-2	P23526;P23526-2			-0.0202618	0.124817	-0.104555	0.33161	0.521151	0.546585	0.4489	0.043602	0.0349636	0.064003	-0.332903	-0.226414	-0.0319939	0.325161	0.137825	15	15	15	39.1	39.1	39.1	47.716	0	169.57	5640300000	202
PSMC2	26S protease regulatory subunit 7	P35998;P35998-2	P35998;P35998-2			-0.0201473	-0.0590439	0.0791912	0.443548	0.672997	0.512884	-0.10339	0.280554	0.330994	0.14859	0.189407	0.0641842	0.444559	0.491623	0.240614	8	8	8	20.1	20.1	20.1	48.633	0	67.972	922410000	98
PC	Pyruvate carboxylase, mitochondrial	P11498;P11498-2	P11498			-0.0198638	-0.18244	0.202304	-0.951722	-0.081267	-0.107545	-0.926646	-1.05686	-1.23065	-0.814185	-1.34516	-1.74124	-1.46912	-1.17454	-1.07049	48	48	48	56.8	56.8	56.8	129.63	0	323.31	67498000000	1192
OAT	Ornithine aminotransferase, mitochondrial;Ornithine aminotransferase, hepatic form;Ornithine aminotransferase, renal form	P04181;P04181-2	P04181;P04181-2			-0.0193164	0.1459	-0.126584	0.774652	1.04901	1.25326	0.320545	-0.128365	-0.109776	0.341379	0.316654	0.323581	0.363151	0.254106	0.544778	9	9	9	28	28	28	48.534	0	73.25	1175100000	87
SMC2	Structural maintenance of chromosomes protein 2	O95347-2;O95347	O95347-2;O95347			-0.0191186	0.0153796	0.00373904	NaN	NaN	NaN	0.206509	0.279727	1.19765	0.109414	0.477091	NaN	0.392546	0.341559	0.0445868	7	7	7	6.6	6.6	6.6	124.92	0	43.068	360410000	12
SERBP1	Plasminogen activator inhibitor 1 RNA-binding protein	Q8NC51-4;Q8NC51-3;Q8NC51-2;Q8NC51	Q8NC51-4;Q8NC51-3;Q8NC51-2;Q8NC51			-0.0190144	0.192211	-0.173197	-1.42505	-0.44249	NaN	0.868876	1.59643	0.889242	0.189285	1.16486	1.59117	0.879784	NaN	-1.79467	6	6	6	20.9	20.9	20.9	42.426	0	95.365	938630000	31
ADH5	Alcohol dehydrogenase class-3	P11766	P11766			-0.0187464	NaN	0.0187464	0.841258	1.3336	0.757646	0.475442	0.323352	0.0973024	0.313384	-0.3012	0.599439	0.7242	NaN	0.470737	3	3	3	8.8	8.8	8.8	39.724	0	19.353	287450000	12
S100A11	Protein S100-A11;Protein S100-A11, N-terminally processed	P31949	P31949			-0.0181777	-0.373219	0.391397	-1.40511	-1.64727	-1.21033	-0.561694	-0.455474	-0.380139	-0.565194	-0.325787	-1.34772	-1.34262	-0.392619	-1.35512	3	3	3	23.8	23.8	23.8	11.74	0	19.377	365760000	43
SND1	Staphylococcal nuclease domain-containing protein 1	Q7KZF4	Q7KZF4			-0.0176665	-0.00313059	0.0207971	0.17308	0.00861104	0.297994	0.217292	0.0483983	0.0549596	0.1342	0.0479959	-0.171078	0.102107	0.343232	0.28461	23	23	23	32	32	32	102	0	170.35	1885700000	176
UQCRC2	Cytochrome b-c1 complex subunit 2, mitochondrial	P22695	P22695			-0.0155156	-0.0245946	0.0401103	0.0895774	0.193144	1.08063	0.392991	0.279723	0.276313	0.381985	0.365012	0.549527	0.341767	-0.162473	0.363295	8	8	8	25.4	25.4	25.4	48.442	0	63.99	889080000	47
AKR1B1;AKR1B15	Aldose reductase;Aldo-keto reductase family 1 member B15	P15121;C9JRZ8;C9JRZ8-2	P15121;C9JRZ8;C9JRZ8-2			-0.0151107	1.65304e-05	0.0150941	-0.241179	-0.177451	-1.06819	0.0986074	0.106042	0.388528	0.231201	0.4029	0.140193	-0.340565	-0.513287	0.0454458	2	2	2	6	6	6	35.853	0	13.596	256070000	19
MT-CO2	Cytochrome c oxidase subunit 2	P00403	P00403			-0.0148697	-0.413441	0.42831	0.552181	0.302862	0.748854	0.709919	-0.0734959	0.0153561	0.381493	0.463514	0.208296	-1.25587	0.248877	0.223749	4	4	4	19.4	19.4	19.4	25.565	0	28.577	1016900000	46
RECQL	ATP-dependent DNA helicase Q1	P46063	P46063			-0.0143204	0.0143204	NaN	-0.31879	NaN	NaN	0.230764	0.116816	0.316811	0.00433731	-0.229807	-0.179419	-0.142412	NaN	NaN	5	5	5	8.5	8.5	8.5	73.457	0	32.33	249480000	12
RPS5	40S ribosomal protein S5;40S ribosomal protein S5, N-terminally processed	P46782	P46782			-0.0126705	-0.305124	0.317795	-0.796	0.866249	0.489441	-0.146803	-0.0426311	-0.0759697	-0.104486	-0.39053	-0.304928	-0.0818768	-0.021492	-0.238531	7	7	7	35.8	35.8	35.8	22.876	0	56.295	1731300000	58
ACLY	ATP-citrate synthase	P53396-2;P53396;P53396-3	P53396-2;P53396;P53396-3			-0.012071	0.0611006	-0.0490297	0.584428	0.44509	0.477126	0.192988	0.118109	0.235928	0.00857417	0.0961234	0.250594	0.187625	0.286597	0.436465	32	32	32	36	36	36	119.77	0	323.31	7269600000	381
RPL35	60S ribosomal protein L35	P42766	P42766			-0.0113557	-0.116254	0.12761	-0.811008	-1.9164	-0.946113	-0.826082	-1.20898	-1.25981	-1.28468	-0.983819	-0.751371	-0.69721	-0.82612	-0.676296	5	5	5	29.3	29.3	29.3	14.551	0	101.2	10435000000	85
HNRNPUL1	Heterogeneous nuclear ribonucleoprotein U-like protein 1	Q9BUJ2-4;Q9BUJ2-2;Q9BUJ2;Q9BUJ2-3;Q9BUJ2-5	Q9BUJ2-4;Q9BUJ2-2;Q9BUJ2;Q9BUJ2-3			-0.0110614	0.106504	-0.0954425	-0.448689	-0.792308	NaN	NaN	0.311609	0.062322	-0.294482	0.194711	-0.0188052	-0.0912615	NaN	-0.530638	4	4	4	5.6	5.6	5.6	84.793	0	23.071	105600000	9
PSMD2	26S proteasome non-ATPase regulatory subunit 2	Q13200;Q13200-2;Q13200-3	Q13200;Q13200-2;Q13200-3			-0.0106468	-0.0519829	0.0626297	0.0602474	-0.396967	0.400986	0.140402	0.14369	0.275986	-0.0580902	0.194132	0.0523624	0.0249214	0.382471	0.599998	14	14	14	18.9	18.9	18.9	100.2	0	147.21	1401400000	143
TCP1	T-complex protein 1 subunit alpha	P17987	P17987			-0.0103079	-0.040219	0.0505269	0.499601	1.03162	0.722928	0.391765	0.257972	0.310689	0.270786	0.242143	0.233461	0.33744	0.42245	0.571103	24	24	24	47.8	47.8	47.8	60.343	0	319.1	8073000000	294
VCP	Transitional endoplasmic reticulum ATPase	P55072	P55072			-0.00960859	-0.0777753	0.0873839	0.62943	0.696055	0.982379	-0.0553945	0.0664374	-0.0132173	-0.0426744	-0.205507	0.158055	0.135022	0.185374	0.255936	29	29	29	40.9	40.9	40.9	89.321	0	323.31	12770000000	377
DYNC1H1	Cytoplasmic dynein 1 heavy chain 1	Q14204	Q14204			-0.00850677	0.116909	-0.108402	-0.280931	-1.24704	-0.677855	0.0910854	-0.334225	-0.447838	-0.549131	-0.47014	-0.553011	-0.398006	-0.466419	-0.725	34	34	34	8.1	8.1	8.1	532.4	0	213.81	1495300000	132
FASN	Fatty acid synthase;[Acyl-carrier-protein] S-acetyltransferase;[Acyl-carrier-protein] S-malonyltransferase;3-oxoacyl-[acyl-carrier-protein] synthase;3-oxoacyl-[acyl-carrier-protein] reductase;3-hydroxyacyl-[acyl-carrier-protein] dehydratase;Enoyl-[acyl-carrier-protein] reductase;Oleoyl-[acyl-carrier-protein] hydrolase	P49327	P49327			-0.00769742	-0.00501188	0.0127093	0.79317	0.452445	0.785771	0.728682	0.667292	0.443354	0.670705	0.497885	0.560584	0.569098	0.671557	0.690171	68	68	68	34.4	34.4	34.4	273.42	0	323.31	29693000000	971
GANAB	Neutral alpha-glucosidase AB	Q14697;Q14697-2	Q14697;Q14697-2			-0.00757154	-0.027633	0.0352046	0.294142	0.609299	0.346181	0.33755	0.244267	0.0188738	0.146985	-0.0925344	-0.149047	-0.0163377	0.0654475	0.257075	25	25	25	29.2	29.2	29.2	106.87	0	221.64	4755500000	270
MDH1	Malate dehydrogenase, cytoplasmic	P40925;P40925-3;P40925-2	P40925;P40925-3;P40925-2			-0.00614357	0.121347	-0.115204	0.673929	1.00275	0.591833	0.555033	0.507793	0.253376	0.303877	0.383564	0.39909	0.770988	0.471352	0.747534	10	10	10	34.1	34.1	34.1	36.426	0	86.367	3236800000	123
PHGDH	D-3-phosphoglycerate dehydrogenase	O43175	O43175			-0.0052077	0.0740579	-0.0688502	0.48191	-0.0154158	0.422654	0.21112	0.0836538	0.186179	0.274644	0.360254	0.164878	0.531528	0.287294	0.239322	12	12	12	25.7	25.7	25.7	56.65	0	106.14	4135200000	141
PRDX1	Peroxiredoxin-1	Q06830	Q06830			-0.00519816	0.18542	-0.180222	0.242292	-0.287379	0.0349611	-0.0599925	0.176727	-0.0590426	-0.136744	0.167407	0.130632	-0.367642	-0.13667	-0.0299727	13	13	10	61.3	61.3	48.2	22.11	0	109.49	11736000000	160
RPL19	60S ribosomal protein L19	P84098	P84098			-0.00330226	0.00672086	-0.0034186	0.00189336	-0.0321871	-0.161172	-0.160128	-0.0918147	-0.619479	-0.173424	-0.132363	0.801887	-0.376589	-0.303551	-0.0701529	5	5	5	21.9	21.9	21.9	23.466	0	80.601	6153700000	75
TALDO1	Transaldolase	P37837	P37837			-0.00292969	-0.0805607	0.0834904	0.165455	-0.0157146	-0.246878	0.515589	0.261177	0.246832	0.357714	0.557621	0.758358	-0.0864429	0.158903	0.452126	10	10	10	30.9	30.9	30.9	37.54	0	84.429	1514600000	119
2020-09-07	Septin-7	Q16181-2;Q16181;Q6ZU15	Q16181-2;Q16181			-0.00212924	-0.095761	0.0978902	0.398132	0.172534	0.745502	0.307973	0.437541	0.535501	0.325948	-0.215829	-0.0852896	0.0245317	0.113912	0.251579	9	9	9	25.5	25.5	25.5	50.58	0	72.049	1321100000	97
ERH	Enhancer of rudimentary homolog	P84090	P84090			-0.00192261	-0.0634594	0.065382	NaN	NaN	-0.552217	0.0591717	0.359337	NaN	-0.120148	0.372662	-0.18638	0.200684	NaN	NaN	2	2	2	21.2	21.2	21.2	12.259	0	47.658	287820000	20
EIF4G1	Eukaryotic translation initiation factor 4 gamma 1	Q04637-6;Q04637-5;Q04637-4;Q04637-3;Q04637;Q04637-9	Q04637-6;Q04637-5;Q04637-4;Q04637-3;Q04637;Q04637-9			-0.00120799	0.132364	-0.131156	-0.00397936	-0.442403	-0.523019	0.0503858	0.19741	0.092254	0.0712598	-0.0717284	0.0942739	-0.0656363	-0.149733	-0.0155684	18	18	1	15.6	15.6	0.6	154.8	0	138.92	1808700000	183
TUBA1B;TUBA4A	Tubulin alpha-1B chain;Tubulin alpha-4A chain	P68363;P68363-2;P68366-2;P68366;Q9H853;A6NHL2-2;A6NHL2	P68363;P68363-2;P68366-2;P68366			-0.00109037	0.126816	-0.125726	0.679702	0.952786	1.18305	0.263384	0.189618	0.237433	0.306403	0.170199	0.448744	0.458712	0.51314	0.6995	21	21	1	55.9	55.9	2.9	50.151	0	323.31	71937000000	425
EIF4A1	Eukaryotic initiation factor 4A-I	P60842;P60842-2	P60842;P60842-2			-0.000762939	-0.0493603	0.0501232	0.622705	0.488543	0.503263	0.183714	0.149464	0.0285854	0.0268059	-0.0120125	0.262747	0.283606	0.332567	0.474943	23	23	12	55.2	55.2	29.8	46.153	0	312.39	21452000000	480
RRM1	Ribonucleoside-diphosphate reductase large subunit	P23921	P23921			-0.000636419	-0.171153	0.17179	0.0939166	-0.140832	0.20975	-0.140876	0.10773	-0.0727876	0.0679652	-0.0337308	0.105639	0.0602194	0.0374247	0.283515	8	8	8	13.5	13.5	13.5	90.069	0	64.561	1017300000	94
CDC42	Cell division control protein 42 homolog	P60953;P60953-1	P60953;P60953-1			-0.000417709	-0.00395012	0.00436783	NaN	2.42208	1.72238	0.504389	1.58292	1.96967	1.0316	1.50229	1.02126	0.991692	NaN	0.835873	4	4	4	25.7	25.7	25.7	21.258	0	29.301	991860000	30
PARK7	Protein deglycase DJ-1	Q99497	Q99497			-0.000110626	0.108812	-0.108702	3.73656	3.65651	3.78493	4.20654	3.84734	3.92112	4.04726	4.06739	3.61284	3.47416	3.85785	3.40817	13	13	13	64.6	64.6	64.6	19.891	0	127.04	18025000000	224
CYB5B	Cytochrome b5 type B	O43169	O43169			0	NaN	NaN	4.31535	1.74625	4.0871	4.58813	4.18239	4.20902	4.97819	4.3653	4.46025	4.27199	5.09484	3.93251	4	4	4	50.7	50.7	50.7	16.332	0	107.91	4998700000	68
NUP155	Nuclear pore complex protein Nup155	O75694-2;O75694	O75694-2;O75694			0	NaN	NaN	NaN	0.294266	0.549128	0.604603	0.267876	0.167135	-0.0748672	NaN	-0.0614929	0.38051	-0.145082	1.11457	5	5	5	3.8	3.8	3.8	149.01	0	31.415	157110000	18
CYB5R3	NADH-cytochrome b5 reductase 3;NADH-cytochrome b5 reductase 3 membrane-bound form;NADH-cytochrome b5 reductase 3 soluble form	P00387-2;P00387;P00387-3	P00387-2;P00387;P00387-3			0	NaN	NaN	0.154669	0.618387	0.89613	NaN	1.04725	0.0941734	0.713676	-0.08745	0.187437	NaN	-0.149305	0.301638	6	6	6	27	27	27	31.628	0	41.192	584380000	18
SERPINB6	Serpin B6	P35237;P50452-2;P50452	P35237			0	NaN	NaN	0.339209	-0.00941658	0.614384	0.55933	0.317001	0.121199	0.0951614	0.0841351	-0.0606747	0.545635	0.160446	NaN	5	5	5	17.3	17.3	17.3	42.621	0	31.719	415530000	16
ARL3	ADP-ribosylation factor-like protein 3	P36405	P36405			0	NaN	NaN	0.570143	NaN	0.919151	0.336763	0.0901222	0.00499153	0.426411	-0.00745773	0.123734	NaN	-0.194736	0.608776	4	4	4	28	28	28	20.455	0	33.099	229060000	7
SCRN1	Secernin-1	Q12765-3;Q12765;Q12765-2	Q12765-3;Q12765;Q12765-2			0	NaN	NaN	0.461424	-0.269449	NaN	0.0430088	-0.0774879	-0.215027	-0.0406666	-0.0940475	-0.00829697	NaN	NaN	-0.256907	2	2	2	5.8	5.8	5.8	38.863	0	13.787	84009000	18
ADRM1	Proteasomal ubiquitin receptor ADRM1	Q16186	Q16186			0	NaN	NaN	-0.319597	0.153999	NaN	0.242579	1.2587	1.04359	0.199631	0.523365	0.456118	0.0533867	NaN	NaN	2	2	2	6.1	6.1	6.1	42.153	0	13.537	109210000	13
CDK12	Cyclin-dependent kinase 12	Q9NYV4-2;Q9NYV4;Q9NYV4-3	Q9NYV4-2;Q9NYV4;Q9NYV4-3			0	NaN	NaN	2.85141	2.32202	2.34337	3.08317	2.54463	2.88247	1.78569	0.803797	0.900797	3.23605	3.31049	3.11083	20	20	18	16.6	16.6	14.9	163.23	0	151.64	1975300000	122
MYO6	Unconventional myosin-VI	Q9UM54-5;Q9UM54-2;Q9UM54-6;Q9UM54-4;Q9UM54-1;Q9UM54	Q9UM54-5;Q9UM54-2;Q9UM54-6;Q9UM54-4;Q9UM54-1;Q9UM54			0	NaN	NaN	0.819649	NaN	NaN	0.310585	0.235924	0.0212593	-0.293972	-0.448244	0.223444	NaN	0.500858	0.423038	5	5	5	5.4	5.4	5.4	145.04	0	30.699	189360000	17
HNRNPAB	Heterogeneous nuclear ribonucleoprotein A/B	Q99729-3;Q99729-2;Q99729-4;Q99729	Q99729-3;Q99729-2;Q99729-4;Q99729			0.000216802	-0.0821807	0.0819639	NaN	-0.090306	NaN	-0.0517451	0.18226	NaN	0.164893	0.499343	0.535501	NaN	NaN	0.00254949	3	3	3	12.3	12.3	12.3	30.588	0	21.214	512810000	22
CCT6A	T-complex protein 1 subunit zeta	P40227;P40227-2;Q92526;Q92526-2;Q92526-3	P40227;P40227-2			0.00168864	0.0232779	-0.0249666	0.657056	0.690942	0.96662	0.310445	0.238173	0.232888	0.344802	-0.0591729	0.347102	0.272317	0.250411	0.416012	19	19	19	37.3	37.3	37.3	58.024	0	220.82	8266600000	273
RRBP1	Ribosome-binding protein 1	Q9P2E9-3;Q9P2E9;Q8N4C6-6;Q8N4C6-11;Q8N4C6-4;Q8N4C6-9;Q8N4C6-2;Q8N4C6;Q8N4C6-5;Q8N4C6-10;Q8N4C6-7	Q9P2E9-3;Q9P2E9			0.00237656	-0.130678	0.128302	NaN	NaN	NaN	0.0975418	0.20829	-0.0354061	-0.31168	-0.0697975	-0.348196	NaN	NaN	-0.324734	7	7	7	8.8	8.8	8.8	108.63	0	48.466	134530000	14
TBCB	Tubulin-folding cofactor B	Q99426-2;Q99426	Q99426-2;Q99426			0.0030117	0.0492191	-0.0522308	0.0994911	-0.747221	0.399948	0.356226	0.589283	0.646156	-0.0177269	-0.189749	-0.283857	0.279324	0.110693	0.108627	6	6	6	37.8	37.8	37.8	21.801	0	57.635	921080000	66
ATP5F1	ATP synthase F(0) complex subunit B1, mitochondrial	P24539	P24539			0.00332069	-0.20656	0.203239	-1.06244	NaN	-1.45651	-0.22875	-0.188087	0.201553	0.261015	0.192476	-0.488466	-0.644449	0.107225	-0.846882	4	4	4	16.4	16.4	16.4	28.908	0	24.112	208600000	24
TES	Testin	Q9UGI8-2;Q9UGI8	Q9UGI8-2;Q9UGI8			0.00369453	-0.0234108	0.0197163	-1.17183	-0.000976562	NaN	0.518578	0.752203	0.595331	-0.0999756	0.128317	0.529417	-0.12081	NaN	-0.737282	7	7	7	16.5	16.5	16.5	46.91	0	51.437	279890000	55
RPS4X;RPS4Y2;RPS4Y1	40S ribosomal protein S4, X isoform;40S ribosomal protein S4, Y isoform 2;40S ribosomal protein S4, Y isoform 1	P62701;Q8TD47;P22090	P62701;Q8TD47;P22090			0.00538826	-0.027914	0.0225258	0.24251	-0.359869	-0.308962	-0.148216	-0.169775	-0.208223	-0.265009	-0.148487	0.162792	-0.181536	-0.357489	0.154076	14	14	14	46.4	46.4	46.4	29.597	0	140.64	7259800000	205
HSPA5	78 kDa glucose-regulated protein	P11021	P11021			0.00598971	0.0547435	-0.0607332	0.270266	0.10476	0.281167	0.0286528	0.146838	-0.0518945	0.228707	0.434577	0.702634	0.297585	-0.21395	0.477606	23	22	22	41.9	41.9	41.9	72.332	0	290.69	11278000000	395
CNDP2	Cytosolic non-specific dipeptidase	Q96KP4;Q96KP4-2	Q96KP4;Q96KP4-2			0.0064532	-0.140434	0.13398	0.691954	0.57708	0.824818	-0.00711759	0.328553	0.236804	0.196881	0.520777	0.291743	0.00483004	0.211342	0.214339	9	9	9	25.5	25.5	25.5	52.878	0	71.731	955690000	70
XRCC6	X-ray repair cross-complementing protein 6	P12956;P12956-2	P12956;P12956-2			0.00658862	-0.0906766	0.084088	0.607016	0.65889	0.802136	0.305947	0.284323	0.254979	0.271784	0.386668	0.172854	0.39318	0.424731	0.373194	22	22	22	42.5	42.5	42.5	69.842	0	243.92	6476800000	288
RPL3	60S ribosomal protein L3	P39023;Q92901	P39023			0.00705401	0.119597	-0.126651	-0.336244	-0.696716	-0.30569	-0.256368	-0.348626	-0.464193	-0.668771	-0.164222	0.235434	0.385092	-0.725915	-0.142219	13	13	13	34.2	34.2	34.2	46.108	0	145.74	3966100000	171
RPL7A	60S ribosomal protein L7a	P62424	P62424			0.00821749	-0.166398	0.158181	0.248067	-0.455724	-0.0488752	-0.181749	-0.0767644	-0.231601	-0.30713	-0.309764	0.0723845	0.302106	0.326522	0.0781142	11	11	11	33.5	33.5	33.5	29.995	0	88.001	4384100000	205
CCT8	T-complex protein 1 subunit theta	P50990;P50990-2;P50990-3	P50990;P50990-2;P50990-3			0.00936699	0.0729408	-0.0823078	0.118185	-0.147768	0.404541	-0.105677	0.101234	0.108749	-0.0230026	0.306602	0.226877	0.183161	-0.160437	0.199842	26	26	26	50.5	50.5	50.5	59.62	0	260.19	10956000000	401
PELP1	Proline-, glutamic acid- and leucine-rich protein 1	Q8IZL8	Q8IZL8			0.00970014	-0.316641	0.306941	NaN	NaN	NaN	0.322326	-0.147734	1.00573	-0.370986	0.0116323	-0.508628	-0.627783	NaN	-0.157654	4	4	4	6.5	6.5	6.5	119.7	0	29.103	160050000	16
PCNA	Proliferating cell nuclear antigen	P12004	P12004			0.00983556	-0.0140235	0.0041879	0.411376	0.117032	0.902019	0.358198	0.345027	0.554862	0.348735	0.356241	0.0313447	0.556768	0.673671	0.572913	10	10	10	45.6	45.6	45.6	28.768	0	130.03	3481000000	134
HSPD1	60 kDa heat shock protein, mitochondrial	P10809;P10809-2	P10809			0.0106201	0.0939445	-0.104565	0.064085	-0.0132732	0.247496	-0.0871162	-0.0547218	0.0333462	0.174948	0.170063	0.0437584	-0.285376	0.118546	0.165558	28	28	28	62.7	62.7	62.7	61.054	0	323.31	12945000000	335
PSMA4	Proteasome subunit alpha type-4	P25789;P25789-2	P25789;P25789-2			0.0108484	-0.0998828	0.0890344	0.241224	0.0671495	-0.131589	0.318197	0.356895	0.320972	0.0934633	0.0816987	-0.111025	0.400932	0.19433	0.447578	7	7	7	22.2	22.2	22.2	29.483	0	50.167	1414900000	82
ABCE1	ATP-binding cassette sub-family E member 1	P61221	P61221			0.0109787	-0.107782	0.0968037	0.271984	NaN	NaN	0.928579	1.3915	1.20355	0.578249	0.368435	NaN	NaN	NaN	-0.213243	4	4	4	7	7	7	67.314	0	26.811	137240000	22
VCL	Vinculin	P18206-2;P18206;P18206-3	P18206-2;P18206			0.0114568	0.0212568	-0.0327136	-0.189177	-0.547799	-0.452834	-0.167273	-0.188113	-0.287375	-0.0988623	-0.289511	-0.162959	-0.334223	-0.018706	-0.221581	28	28	28	29.3	29.3	29.3	116.72	0	231.04	2904000000	243
DDX1	ATP-dependent RNA helicase DDX1	Q92499-3;Q92499;Q92499-2	Q92499-3;Q92499;Q92499-2			0.0119292	0.128998	-0.140928	-0.143991	0.486422	-0.352586	0.284289	-0.355657	-0.205827	-0.0654062	-0.13107	0.118807	-0.118148	-0.283697	-0.407333	6	6	6	10.5	10.5	10.5	68.712	0	49.156	758480000	58
SAE1	SUMO-activating enzyme subunit 1;SUMO-activating enzyme subunit 1, N-terminally processed	Q9UBE0;Q9UBE0-2;Q9UBE0-3	Q9UBE0;Q9UBE0-2;Q9UBE0-3			0.0124035	-0.023283	0.0108795	0.244625	1.32866	0.763126	0.639769	0.645346	0.897762	0.565886	0.361858	0.00418472	0.318697	0.610218	0.309164	10	10	10	29.8	29.8	29.8	38.449	0	70.676	788290000	66
GFPT1	Glutamine--fructose-6-phosphate aminotransferase [isomerizing] 1	Q06210-2;Q06210;O94808	Q06210-2;Q06210			0.0126724	0.0482712	-0.0609436	-0.125765	-0.264099	-0.255812	0.0626945	-0.145365	-0.231627	-0.241447	-0.230782	0.00883675	0.164309	0.0284023	0.00279427	15	15	15	25	25	25	76.758	0	127.55	1621300000	163
EEF1G	Elongation factor 1-gamma	P26641;P26641-2	P26641;P26641-2			0.0127926	0.0315495	-0.044342	0.294516	0.63389	0.121552	0.253658	0.0164413	-0.0895157	-0.00105858	0.00272751	0.00117302	0.0861053	0.273201	0.265667	18	18	18	41.2	41.2	41.2	50.118	0	182.21	8198600000	252
SHMT2	Serine hydroxymethyltransferase, mitochondrial	P34897-3;P34897;P34897-2;P34896-4	P34897-3;P34897;P34897-2			0.0134741	-0.144752	0.131278	0.272772	0.795531	0.662539	0.115231	1.15954	-0.100816	0.188878	0.177993	0.218365	0.0677592	0.358277	0.299456	17	17	16	37.3	37.3	34.4	53.454	0	135.04	3526400000	238
STRAP	Serine-threonine kinase receptor-associated protein	Q9Y3F4;Q9Y3F4-2	Q9Y3F4;Q9Y3F4-2			0.0136655	0.0842164	-0.097882	0.237558	0.464172	0.657613	0.366966	0.344161	0.121303	0.363586	-0.227349	0.376542	0.560472	0.771007	0.480232	12	12	12	44.3	44.3	44.3	38.438	0	105.01	2387400000	111
RAB1A	Ras-related protein Rab-1A	P62820;P62820-2;P62820-3;Q9H0U4;Q92928;Q92930;P61006-2;P59190-2;P59190	P62820;P62820-2			0.0139529	-0.0883516	0.0743987	0.283229	1.21415	0.659152	0.471446	0.440127	0.666485	0.290724	0.6608	0.497143	0.0885302	0.362651	0.699893	9	9	8	42.9	42.9	37.6	22.677	0	66.375	2709900000	68
HSP90AB1	Heat shock protein HSP 90-beta	P08238;Q58FF7	P08238			0.0145741	0.0345631	-0.0491371	0.336891	0.440855	0.623751	0.282585	0.381611	0.371206	0.281391	0.184587	0.216875	0.375635	0.381834	0.422983	41	41	20	51.7	51.7	27.8	83.263	0	323.31	66552000000	803
TRAP1	Heat shock protein 75 kDa, mitochondrial	Q12931-2;Q12931	Q12931-2;Q12931			0.0147743	0.0258865	-0.0406609	0.567533	-1.32639	0.283907	-0.0407047	-0.00832176	-0.312599	0.0471764	-0.211939	-0.5903	-0.34197	0.176626	-0.209614	11	11	11	18.6	18.6	18.6	74.267	0	74.875	813640000	52
ME2	NAD-dependent malic enzyme, mitochondrial	P23368;P23368-2;Q16798-2;Q16798	P23368;P23368-2			0.0164121	-0.0164363	2.41597e-05	-0.0911223	0.172551	0.283323	0.183732	0.108646	0.148877	-0.205044	0.162113	0.316324	0.212066	0.0816987	0.690303	6	6	6	10.6	10.6	10.6	65.443	0	42.807	388710000	38
VPS35	Vacuolar protein sorting-associated protein 35	Q96QK1	Q96QK1			0.0165361	0.090793	-0.107329	0.835792	0.497371	0.661502	0.135028	0.396383	0.289928	0.470514	0.202077	1.0465	0.474628	0.30235	0.821025	11	11	11	16.8	16.8	16.8	91.706	0	113.89	1306500000	94
HACD3	Very-long-chain (3R)-3-hydroxyacyl-CoA dehydratase 3	Q9P035;Q9P035-2	Q9P035;Q9P035-2			0.0168648	-0.29142	0.274555	1.13976	1.55278	1.53473	0.55724	0.805279	0.796093	0.898144	0.471201	0.623114	0.612644	1.29656	1.13738	6	6	6	19.6	19.6	19.6	43.159	0	62.478	1262600000	94
ASNS	Asparagine synthetase [glutamine-hydrolyzing]	P08243-2;P08243;P08243-3	P08243-2;P08243;P08243-3			0.0173422	0.00709216	-0.0244344	-0.0289605	-0.471088	-0.284219	0.680434	0.314578	0.178391	0.290345	0.428185	0.582162	0.298773	-0.429159	0.294896	9	9	9	19.4	19.4	19.4	62.168	0	59.396	554310000	57
SF3A3	Splicing factor 3A subunit 3	Q12874	Q12874			0.0190976	0.00333913	-0.0224368	-0.245211	NaN	NaN	0.0724061	0.0126432	0.0200685	0.00566991	NaN	-0.00195185	NaN	0.0100778	0.235837	4	4	4	10.2	10.2	10.2	58.848	0	22.643	290000000	5
ATXN2L	Ataxin-2-like protein	Q8WWM7-6;Q8WWM7-8;Q8WWM7-5;Q8WWM7-4;Q8WWM7-9;Q8WWM7-2;Q8WWM7;Q8WWM7-3;Q8WWM7-7	Q8WWM7-6;Q8WWM7-8;Q8WWM7-5;Q8WWM7-4;Q8WWM7-9;Q8WWM7-2;Q8WWM7;Q8WWM7-3;Q8WWM7-7			0.0202421	-0.267602	0.24736	-1.06676	NaN	-0.210631	0.347005	1.04704	0.980291	0.529544	0.506912	0.414878	-0.034146	-0.472178	-0.00964038	5	5	5	5.4	5.4	5.4	102.89	0	31.277	145420000	27
ETF1	Eukaryotic peptide chain release factor subunit 1	P62495-2;P62495	P62495-2;P62495			0.0208956	-0.0523179	0.0314223	-0.432296	-0.231124	-0.170787	0.0758044	0.256041	0.0939414	-0.273288	-0.0589422	-0.33349	-0.0577348	-0.572515	0.407921	8	8	8	23.5	23.5	23.5	45.462	0	56.008	626620000	30
RPS26;RPS26P11	40S ribosomal protein S26;Putative 40S ribosomal protein S26-like 1	P62854;Q5JNZ5	P62854;Q5JNZ5			0.0214183	0.305451	-0.326869	-0.368026	-0.131576	0.433674	-0.338477	-0.498456	-0.437234	-0.337669	-0.255496	0.323035	-0.0752977	0.247863	0.251378	2	2	2	20.9	20.9	20.9	13.015	0	14.006	2627700000	63
PPP2R1A	Serine/threonine-protein phosphatase 2A 65 kDa regulatory subunit A alpha isoform	P30153;P30154-5;P30154-4;P30154;P30154-2;P30154-3	P30153			0.021527	0.132357	-0.153884	0.143141	-0.110998	0.666781	-0.0121473	-0.0505594	0.00230471	0.126311	0.21482	0.288081	0.177584	0.408293	0.383511	18	18	18	37.5	37.5	37.5	65.308	0	153.36	4705500000	213
GSTP1	Glutathione S-transferase P	P09211	P09211			0.0221901	0.121565	-0.143755	0.940281	0.707876	0.971478	-0.0314846	0.142689	0.0255718	0.379715	0.346844	0.445452	0.546511	0.492912	0.382282	7	7	7	50	50	50	23.356	0	79.976	2694400000	102
SRP68	Signal recognition particle subunit SRP68	Q9UHB9-4;Q9UHB9;Q9UHB9-2;Q9UHB9-3	Q9UHB9-4;Q9UHB9;Q9UHB9-2;Q9UHB9-3			0.0243518	-0.138303	0.113951	-0.120616	-1.12972	-0.729598	0.132138	0.130765	0.588999	0.0099837	0.300372	-0.294067	-0.0983022	0.966574	-0.0461171	7	7	7	13.2	13.2	13.2	66.107	0	45.127	328770000	53
PSMC4	26S protease regulatory subunit 6B	P43686-2;P43686	P43686-2;P43686			0.0247205	-0.146264	0.121543	-0.441514	-0.683383	-0.249379	0.0787595	0.245939	0.0298589	-0.425227	-0.0945193	-0.0180766	0.165878	0.309804	0.29841	8	8	8	23.3	23.3	23.3	43.507	0	53.247	702830000	71
RPLP0;RPLP0P6	60S acidic ribosomal protein P0;60S acidic ribosomal protein P0-like	P05388;P05388-2;Q8NHW5	P05388;P05388-2;Q8NHW5			0.0248483	0.0960763	-0.120925	0.572746	1.1321	1.39184	-0.0606162	0.0343965	0.101734	0.209543	0.0800928	0.0182317	0.128005	0.580253	0.639537	10	10	10	43.8	43.8	43.8	34.273	0	101.46	3816800000	165
IMPDH2	Inosine-5-monophosphate dehydrogenase 2	P12268;P20839-2;P20839-4;P20839;P20839-3;P20839-7;P20839-5;P20839-6	P12268			0.0252806	-0.046552	0.0212714	-0.146486	-0.200137	0.306262	-0.477096	-0.520036	-0.572683	-0.666526	-0.279613	-0.766454	-0.487359	-0.751344	-0.675189	15	15	15	33.3	33.3	33.3	55.804	0	117.72	2527100000	147
PRMT1	Protein arginine N-methyltransferase 1	Q99873-2;Q99873-3;Q99873;Q99873-5;Q9NR22-2;Q9NR22	Q99873-2;Q99873-3;Q99873			0.0254803	0.187881	-0.213362	0.602961	0.926895	0.828852	-0.178532	0.165777	-0.0071106	0.215063	0.130768	0.530678	0.223068	0.352045	0.312664	9	9	9	25.1	25.1	25.1	39.928	0	89.053	2501200000	100
CCT7	T-complex protein 1 subunit eta	Q99832;Q99832-3;Q99832-4;Q99832-2	Q99832;Q99832-3;Q99832-4;Q99832-2			0.0263106	-0.00667508	-0.0196355	0.458756	0.785916	0.583989	-0.167644	-0.19886	-0.199205	0.0765597	-0.259904	0.401492	-0.15195	0.0547015	0.261944	17	17	17	37.2	37.2	37.2	59.366	0	137.57	4339900000	195
ACAA2	3-ketoacyl-CoA thiolase, mitochondrial	P42765	P42765			0.0273635	-0.0925954	0.065232	0.805476	-0.162858	1.02941	0.487765	0.324893	0.683675	-0.0688585	0.198487	-0.255176	1.07567	0.746091	0.445742	8	8	8	28.2	28.2	28.2	41.924	0	65.721	814240000	62
RPS16	40S ribosomal protein S16	P62249	P62249			0.027689	-0.0569878	0.0292988	0.600832	0.93788	0.412653	0.44643	0.0497189	0.0519829	0.403641	0.147169	0.120129	0.238848	0.496407	0.345493	10	10	10	54.1	54.1	54.1	16.445	0	102.89	4087100000	138
FARSB	Phenylalanine--tRNA ligase beta subunit	Q9NSD9;Q9NSD9-2	Q9NSD9;Q9NSD9-2			0.0289103	-0.0781034	0.0491931	0.670561	0.273743	0.526078	0.285393	0.327746	0.454554	-0.0279153	-0.245258	-0.0600465	0.586375	0.523167	0.615878	9	9	9	14.6	14.6	14.6	66.115	0	58.907	563440000	58
PGAM1;PGAM2	Phosphoglycerate mutase 1;Phosphoglycerate mutase 2	P18669;P15259;Q8N0Y7	P18669;P15259			0.0289256	-0.306613	0.277688	-0.0519937	0.466593	-0.0376809	-0.0341199	-0.0032018	0.238108	-0.144813	-0.104019	-0.286308	-0.213668	-0.957715	-0.0968603	9	9	9	38.2	38.2	38.2	28.804	0	81.409	1767300000	87
CAP1	Adenylyl cyclase-associated protein 1	Q01518-2;Q01518;P40123-3;P40123-2;P40123	Q01518-2;Q01518			0.0294228	-0.214926	0.185503	0.14485	0.438145	0.740488	0.0527954	-0.268913	-0.0314522	0.0688248	0.130371	-0.170174	-0.258673	0.108273	-0.0668678	9	9	9	24.5	24.5	24.5	51.83	0	75.135	1864200000	85
PSME1	Proteasome activator complex subunit 1	Q06323-3;Q06323;Q06323-2	Q06323-3;Q06323;Q06323-2			0.0305926	0.578599	-0.609191	-0.231296	-0.761281	-0.964881	-0.294683	-0.815378	-0.407661	-0.00932439	-0.123632	-0.424089	-0.4857	-0.465721	-0.97451	5	5	5	23.2	23.2	23.2	26.87	0	31.119	258410000	26
2020-09-11	Septin-11	Q9NVA2;Q9NVA2-2;Q14141-2;Q14141-4;Q14141;Q14141-3;Q92599-3;Q92599-2;Q92599-4;Q92599	Q9NVA2;Q9NVA2-2			0.0310491	-0.0866763	0.0556272	0.219602	-0.279963	-0.467261	0.793275	0.696174	0.672109	-0.0509974	0.183099	-0.694485	0.403921	0.127172	0.090751	7	7	7	21	21	21	49.398	0	51.251	374180000	42
MTHFD1	C-1-tetrahydrofolate synthase, cytoplasmic;Methylenetetrahydrofolate dehydrogenase;Methenyltetrahydrofolate cyclohydrolase;Formyltetrahydrofolate synthetase;C-1-tetrahydrofolate synthase, cytoplasmic, N-terminally processed	P11586	P11586			0.0316168	-0.091245	0.0596282	0.413977	0.545994	0.585398	0.318471	0.174508	0.290621	0.0727221	0.0378215	0.0747344	0.450732	0.369815	0.31967	29	29	29	35.4	35.4	35.4	101.56	0	246.29	3694100000	241
EIF3G	Eukaryotic translation initiation factor 3 subunit G	O75821	O75821			0.0319087	0.113249	-0.145158	0.532498	0.200694	-0.467271	-0.00282605	0.0221354	0.247496	-0.0479902	-0.350105	0.475236	0.168229	0.863867	-0.0948289	6	6	6	24.7	24.7	24.7	35.611	0	54.916	649470000	45
XPNPEP1	Xaa-Pro aminopeptidase 1	Q9NQW7-2;Q9NQW7;Q9NQW7-4;Q9NQW7-3	Q9NQW7-2;Q9NQW7;Q9NQW7-4;Q9NQW7-3			0.0341015	0.0449772	-0.0790787	0.469622	0.657211	0.932878	-0.843866	-0.652822	-0.575787	-0.273035	-0.630335	-0.464399	-0.0393772	-0.548206	0.134186	3	3	3	5.7	5.7	5.7	67.226	0	22.035	243710000	31
EIF5A	Eukaryotic translation initiation factor 5A-1	P63241;P63241-2;Q9GZV4;Q6IS14	P63241;P63241-2			0.0342395	-0.178863	0.144623	0.154843	0.915116	0.82121	0.274098	0.0109812	0.0333068	0.100024	0.0797812	-0.00988134	0.352294	0.985987	0.386851	7	7	7	44.8	44.8	44.8	16.832	0	79.397	2076200000	59
CCT2	T-complex protein 1 subunit beta	P78371;P78371-2	P78371;P78371-2			0.0342547	-0.0329526	-0.00130208	0.803361	0.868127	0.746539	0.310473	0.150548	0.475505	0.465119	0.323466	0.297572	0.117421	0.308297	0.315591	24	24	24	53.1	53.1	53.1	57.488	0	308.51	7924800000	319
CHTOP	Chromatin target of PRMT1 protein	Q9Y3Y2-4;Q9Y3Y2;Q9Y3Y2-3	Q9Y3Y2-4;Q9Y3Y2;Q9Y3Y2-3			0.0343122	-0.0343122	NaN	-0.423383	NaN	NaN	-0.239009	-0.0929594	-0.313748	-0.324763	0.0025568	1.57909	NaN	NaN	-0.366961	2	2	2	14.4	14.4	14.4	21.918	0	14.731	112590000	8
TUBB2A	Tubulin beta-2A chain	Q13885	Q13885			0.0357558	-0.330625	0.294869	0.741767	0.601153	1.13089	-0.202289	0.342265	0.0822875	-0.245006	-0.0971044	-0.0548776	0.179867	0.196322	0.347977	20	5	1	61.3	16.9	2.7	49.906	0	57.839	881250000	76
IRGQ	Immunity-related GTPase family Q protein	Q8WZA9	Q8WZA9			0.0360076	0.103121	-0.139129	-0.0351785	-0.0683435	0.278231	-0.145505	0.075236	-0.270856	-0.00320562	-0.447524	-0.0855687	0.23782	-0.174175	0.266642	7	7	7	14.3	14.3	14.3	62.717	0	44.476	350620000	19
DDX6	Probable ATP-dependent RNA helicase DDX6	P26196	P26196			0.0370909	0.119214	-0.156305	0.455615	0.83132	0.936732	-0.31393	-0.166637	0.136124	-0.0444291	-0.0620149	0.154801	-0.00477155	0.0287711	0.571749	5	5	5	14.5	14.5	14.5	54.416	0	43.289	585000000	41
UCHL1	Ubiquitin carboxyl-terminal hydrolase isozyme L1	P09936	P09936	+		0.0379155	-0.213648	0.175733	6.71268	6.80197	6.40885	6.51016	5.95927	6.07443	5.66363	5.28615	4.80751	6.83641	7.11523	6.81427	19	19	19	90.6	90.6	90.6	24.824	0	323.31	218380000000	662
EEF2	Elongation factor 2	P13639	P13639			0.0387217	-0.0407232	0.00200144	-0.0117029	0.0424468	-0.206119	-0.0151742	0.0336425	-0.0791334	-0.129627	-0.139875	-0.123725	0.103537	0.123068	0.0426375	38	38	37	45.3	45.3	44.2	95.337	0	323.31	39051000000	641
IGF2BP1	Insulin-like growth factor 2 mRNA-binding protein 1	Q9NZI8;Q9NZI8-2;Q9Y6M1-5;Q9Y6M1-6;Q9Y6M1-3;Q9Y6M1-4;Q9Y6M1-1;Q9Y6M1	Q9NZI8;Q9NZI8-2			0.0412051	-0.0517095	0.0105044	-0.04264	-0.334998	0.385277	-0.0631078	0.0460879	0.200217	0.0468909	0.0727603	0.120522	0.147698	0.19015	-0.0112336	13	13	12	26.5	26.5	24.3	63.48	0	100.68	1463500000	121
SEC31A	Protein transport protein Sec31A	O94979-6;O94979-3;O94979-10;O94979-4;O94979-9;O94979-2;O94979;O94979-8;O94979-7;O94979-5	O94979-6;O94979-3;O94979-10;O94979-4;O94979-9;O94979-2;O94979;O94979-8;O94979-7			0.041715	-0.106492	0.0647767	0.00435575	NaN	NaN	0.281453	0.320333	0.306552	-0.412793	-0.175629	0.178212	NaN	NaN	NaN	5	5	5	6.5	6.5	6.5	117.67	0	28.188	195440000	12
RBBP4	Histone-binding protein RBBP4	Q09028-3;Q09028;Q09028-2;Q09028-4	Q09028-3;Q09028;Q09028-2;Q09028-4			0.0424074	0.0179284	-0.0603358	0.417499	NaN	0.073686	0.100458	0.386258	0.038318	-0.0892378	-0.336566	0.211837	0.180139	-0.194909	0.339961	7	2	2	19	10	10	46.158	0	20.58	540580000	6
TBCA	Tubulin-specific chaperone A	O75347;O75347-2	O75347;O75347-2			0.042642	0.181226	-0.223868	-0.785084	-0.82453	-1.01061	-0.395034	-0.0887705	0.00404485	0.14326	-0.0603053	-0.425475	-0.190983	0.151853	-0.11887	6	6	6	50.9	50.9	50.9	12.855	0	64.666	905860000	63
TECR	Very-long-chain enoyl-CoA reductase	Q9NZ01;Q9NZ01-2	Q9NZ01			0.042841	-0.124352	0.0815105	NaN	-0.392347	NaN	0.336901	0.279936	0.351814	0.108391	0.0550785	-0.290411	NaN	0.163284	0.282322	6	6	6	18.8	18.8	18.8	36.034	0	37.077	264730000	21
TUFM	Elongation factor Tu, mitochondrial	P49411	P49411			0.0429732	0.0014197	-0.0443929	0.812613	0.884743	0.696992	0.128461	0.155348	0.132538	0.22687	0.09891	0.40548	0.279198	0.457171	0.376153	15	15	15	38.9	38.9	38.9	49.541	0	146.64	3444100000	195
HNRNPM	Heterogeneous nuclear ribonucleoprotein M	P52272-2;P52272	P52272-2;P52272			0.0430234	-0.0588347	0.0158113	0.295453	-0.0488459	0.319427	0.123113	0.00510152	0.119092	0.147207	0.303212	0.0741685	0.145034	-0.282517	0.428686	24	24	24	41.4	41.4	41.4	73.62	0	290.83	6031700000	296
EIF2S1	Eukaryotic translation initiation factor 2 subunit 1	P05198	P05198			0.0430806	0.0184453	-0.061526	0.0045255	0.164256	-0.20592	-0.165744	-0.124081	-0.134116	-0.158665	-0.124371	0.0849641	-0.274144	0.279308	0.370746	11	11	11	36.5	36.5	36.5	36.112	0	92.24	839460000	69
UQCRQ	Cytochrome b-c1 complex subunit 8	O14949	O14949			0.0433865	-0.501637	0.45825	-1.4622	-0.390623	-0.314352	-0.298571	-0.748722	-0.341705	-0.300465	-1.00409	-0.549679	-1.40684	-0.251966	-1.48739	8	8	8	58.5	58.5	58.5	9.9062	0	67.596	8541900000	122
HIST1H4A	Histone H4	P62805	P62805			0.0439949	0.0980816	-0.142076	-0.275873	-1.24037	-1.18838	-0.427397	-0.355484	-0.224543	0.623249	0.617315	1.42783	0.467262	-0.732689	0.0937767	6	6	6	57.3	57.3	57.3	11.367	0	50.452	1896500000	78
TCEB2	Transcription elongation factor B polypeptide 2	Q15370;Q15370-2	Q15370;Q15370-2			0.0444597	0.0609449	-0.105405	-0.650159	NaN	-0.350247	-0.0822055	-0.114278	-0.191205	-0.124982	-0.0207831	1.21682	0.503906	0.0564092	0.46939	4	4	4	33.9	33.9	33.9	13.133	0	27.851	491480000	42
VPS4B	Vacuolar protein sorting-associated protein 4B	O75351;Q6PIW4-2;Q6PIW4	O75351			0.0449263	0.152617	-0.197543	0.448439	0.427691	0.662022	-0.257057	0.371581	-0.105148	-0.140756	-0.152908	0.600056	0.492009	0.887849	1.10108	7	7	6	20.7	20.7	18	49.301	0	42.233	453530000	24
RPL14	60S ribosomal protein L14	P50914	P50914			0.0453161	-0.043925	-0.00139109	-0.302251	-1.5059	-0.122985	-0.205178	-0.379925	-0.573168	-0.48083	-0.621525	0.154796	-0.0975157	-0.41346	-0.272839	3	3	3	16.3	16.3	16.3	23.432	0	48.257	1823000000	84
DRG1	Developmentally-regulated GTP-binding protein 1	Q9Y295	Q9Y295			0.0466296	-0.12659	0.0799605	0.303776	-0.195844	NaN	0.455884	0.288397	0.325341	0.142535	0.435383	0.139203	0.45213	0.391249	NaN	5	5	4	16.1	16.1	14.2	40.542	0	41.546	239810000	15
TTLL12	Tubulin--tyrosine ligase-like protein 12	Q14166	Q14166			0.0468318	-0.316968	0.270137	0.526416	0.116368	-0.23672	-0.18461	0.45905	-0.168037	0.00555674	-0.142188	-0.200454	-0.0506662	0.253741	0.229788	6	6	6	11.6	11.6	11.6	74.403	0	45.073	336080000	29
RPL13	60S ribosomal protein L13	P26373;P26373-2	P26373;P26373-2			0.0472329	0.225549	-0.272782	-0.336287	-1.37258	-0.604394	-0.224869	-0.0950419	-0.317929	-0.364604	-0.025233	0.451248	-0.14473	-0.255572	-0.186785	13	13	13	52.6	52.6	52.6	24.261	0	307.55	24488000000	270
PDIA3	Protein disulfide-isomerase A3	P30101	P30101			0.0474332	0.12276	-0.170193	0.0543092	-0.106703	-0.360041	0.0450433	0.314493	0.0179723	0.272598	0.188894	0.113521	0.0592225	-0.0503775	0.425775	14	14	14	32.1	32.1	32.1	56.782	0	133.06	2460000000	198
DDX3X;DDX3Y	ATP-dependent RNA helicase DDX3X;ATP-dependent RNA helicase DDX3Y	O00571-2;O00571;O15523-2;O15523;O15523-3;Q9NQI0-3;Q9NQI0-2;Q9NQI0-4;Q9NQI0	O00571-2;O00571;O15523-2;O15523			0.0475496	-0.185708	0.138158	-0.653372	-0.144177	-0.191674	-0.158862	-0.346871	-0.292391	-0.285765	-0.507506	-0.751708	-0.425316	-0.582087	-0.772944	12	12	12	19.2	19.2	19.2	71.354	0	90.717	1071800000	86
PA2G4	Proliferation-associated protein 2G4	Q9UQ80;Q9UQ80-2	Q9UQ80;Q9UQ80-2			0.0476017	-0.00216103	-0.0454407	-0.297005	-0.112284	-0.66073	0.195215	0.184462	0.17161	0.206678	0.16514	-0.224026	0.177649	0.158371	0.12376	14	14	14	42.4	42.4	42.4	43.786	0	137.41	2691000000	165
NAA15	N-alpha-acetyltransferase 15, NatA auxiliary subunit	Q9BXJ9;Q9BXJ9-4;Q6N069-5;Q6N069-4;Q6N069-3;Q6N069-2;Q6N069	Q9BXJ9;Q9BXJ9-4			0.0477854	-0.02185	-0.0259355	0.514323	0.401757	0.075442	-0.2571	0.0511996	0.14736	0.230055	0.418984	0.355197	0.0852343	0.264834	0.0612723	7	7	7	7.7	7.7	7.7	101.27	0	47.757	351500000	38
GDI2	Rab GDP dissociation inhibitor beta	P50395;P50395-2	P50395;P50395-2			0.0484695	-0.0572052	0.00873566	0.9007	1.05256	0.877203	0.266111	0.283747	0.213314	0.455791	0.15819	0.448385	0.465839	0.49506	0.598667	19	19	15	46.3	46.3	38.2	50.663	0	184.04	4563000000	225
AP3D1	AP-3 complex subunit delta-1	O14617-4;O14617;O14617-5;O14617-3;O14617-2	O14617-4;O14617;O14617-5;O14617-3;O14617-2			0.048605	-0.048605	NaN	0.265392	NaN	NaN	0.218399	-0.210236	-0.245024	-0.269238	0.197723	-0.0318985	-0.0265617	-0.479107	-0.0803852	6	6	6	6.3	6.3	6.3	114.71	0	37.817	178060000	17
PSMD8	26S proteasome non-ATPase regulatory subunit 8	P48556	P48556			0.0493387	-0.116877	0.0675386	0.059562	0.0359796	-0.219529	-0.0226428	-0.311679	-0.309338	-0.0311343	-0.438292	-0.128262	-0.11279	-0.668128	0.14809	6	6	6	16.6	16.6	16.6	39.611	0	38.262	453100000	36
LDHA	L-lactate dehydrogenase A chain	P00338;P00338-3;P00338-5;P00338-4;P00338-2;Q6ZMR3;P07864	P00338;P00338-3;P00338-5;P00338-4;P00338-2			0.0499624	-0.0672213	0.017259	1.12766	0.409231	1.21044	0.594018	0.501842	0.391666	0.36382	0.385091	0.312839	0.43029	0.28621	0.779411	13	12	12	40.1	36.4	36.4	36.688	0	195.51	16267000000	205
OTUB1	Ubiquitin thioesterase OTUB1	Q96FW1;Q96FW1-2	Q96FW1	+		0.0521539	-0.177119	0.124965	0.0368226	-0.193406	0.690696	0.348586	0.363893	0.630956	0.053716	-0.0479457	0.436033	0.115266	0.0679658	0.353937	8	8	8	35.4	35.4	35.4	31.284	0	62.793	684520000	82
PREP	Prolyl endopeptidase	P48147	P48147			0.0526168	0.275347	-0.327964	0.64668	1.08597	1.68283	0.819472	1.21444	1.47979	1.28137	1.18626	1.10247	0.884944	0.885054	1.37887	10	10	10	19.4	19.4	19.4	80.699	0	82.011	772570000	39
GAPDH	Glyceraldehyde-3-phosphate dehydrogenase	P04406;P04406-2;O14556	P04406;P04406-2			0.0531228	0.132163	-0.185286	0.590326	1.09064	0.579826	0.282102	0.314185	0.165607	0.368446	0.327655	0.379457	0.590696	0.255292	0.750675	15	15	15	51	51	51	36.053	0	319.89	29144000000	357
HMGCS1	Hydroxymethylglutaryl-CoA synthase, cytoplasmic	Q01581;P54868-3;P54868-2;P54868	Q01581			0.055411	-0.0171312	-0.0382799	2.16847	2.0928	2.16785	2.36202	2.08474	2.48772	2.37725	1.95988	2.06767	2.18389	2.03869	2.06435	19	19	19	46	46	46	57.293	0	318.97	16114000000	283
UNC45A	Protein unc-45 homolog A	Q9H3U1-2;Q9H3U1;Q9H3U1-3	Q9H3U1-2;Q9H3U1			0.0559756	0.177012	-0.232988	0.343955	-0.169635	0.39231	0.305438	0.405497	-0.0919336	-0.134466	-0.0438035	0.163302	-0.343704	-0.0866216	-0.0799154	12	12	12	14.1	14.1	14.1	101.67	0	82.378	462530000	42
PRPF38B	Pre-mRNA-splicing factor 38B	Q5VTL8;Q5VTL8-2	Q5VTL8;Q5VTL8-2			0.0560856	-0.0201836	-0.035902	-0.582203	NaN	NaN	-0.410223	-0.0358524	-0.305899	-0.0100021	NaN	-0.11801	-0.230988	NaN	-0.149109	3	3	3	5.1	5.1	5.1	64.467	0	16.69	172190000	7
NSUN2	tRNA (cytosine(34)-C(5))-methyltransferase	Q08J23;Q08J23-2;Q08J23-3	Q08J23;Q08J23-2;Q08J23-3			0.0564969	0.205877	-0.262374	0.868959	0.203708	0.460719	0.77835	0.537132	0.608932	0.139655	0.413951	0.197934	0.519264	-0.0717322	0.718818	14	14	14	19.3	19.3	19.3	86.47	0	90.024	643430000	59
C14orf166	UPF0568 protein C14orf166	Q9Y224	Q9Y224			0.0570634	-0.0315882	-0.0254752	-0.170016	0.125362	0.645572	-0.313969	-0.435116	-0.706299	0.301788	0.11082	0.22272	0.300678	0.00803312	0.134652	5	5	5	23	23	23	28.068	0	36.003	540250000	62
NSDHL	Sterol-4-alpha-carboxylate 3-dehydrogenase, decarboxylating	Q15738	Q15738			0.0573152	-0.0532576	-0.00405757	0.0192769	0.324611	0.561399	-0.126364	-0.187363	0.100509	0.229591	0.206001	0.0740884	0.486007	NaN	0.588926	3	3	3	11.3	11.3	11.3	41.9	0	20.098	168050000	18
VIM	Vimentin	P08670	P08670			0.0578105	0.35731	-0.41512	-0.908521	-0.845701	NaN	-0.0440534	-0.0330633	-0.257442	-0.249376	-0.476421	0.26026	-0.138597	0.245534	-0.0646451	10	8	8	22.3	19.1	19.1	53.651	0	55.961	449810000	42
ARPC3	Actin-related protein 2/3 complex subunit 3	O15145	O15145			0.0578976	-0.0578976	NaN	0.213356	0.579533	NaN	0.317348	0.339939	0.188444	-0.0900688	0.162756	-0.139297	-0.366558	NaN	0.344683	2	2	2	12.4	12.4	12.4	20.546	0	14.253	108400000	15
WARS	Tryptophan--tRNA ligase, cytoplasmic;T1-TrpRS;T2-TrpRS	P23381;P23381-2	P23381;P23381-2			0.0588856	-0.209967	0.151081	-0.966921	-0.983864	0.471714	-0.0734367	-0.173794	-0.388618	-0.240692	-0.107769	0.142454	NaN	NaN	-0.679369	5	5	5	13.6	13.6	13.6	53.165	0	31.455	450130000	23
YWHAG	14-3-3 protein gamma;14-3-3 protein gamma, N-terminally processed	P61981	P61981			0.0594667	0.0250982	-0.0845648	-0.740552	-1.22961	-0.0975558	-0.176095	0.0425256	0.284269	-0.175313	0.0852331	-0.0745227	-0.352162	-0.101262	-0.591666	8	5	5	36.4	25.5	25.5	28.302	0	141.64	920080000	66
UBE2L3	Ubiquitin-conjugating enzyme E2 L3	P68036-2;P68036;P68036-3;A0A1B0GUS4	P68036-2;P68036;P68036-3;A0A1B0GUS4			0.0612679	-0.0612679	NaN	-0.150019	0.388594	-0.428596	-0.708776	-0.694418	-0.591471	-0.231813	-0.0940228	0.0874062	-0.674906	NaN	-0.367699	4	4	4	45.1	45.1	45.1	14.121	0	50.594	442650000	29
PEBP1	Phosphatidylethanolamine-binding protein 1;Hippocampal cholinergic neurostimulating peptide	P30086	P30086			0.0613346	-0.0323505	-0.0289841	0.256861	0.513662	0.619123	-0.504189	0.0919094	0.087204	0.0437889	-0.100637	0.575617	0.124876	-0.148296	0.146221	7	7	7	58.8	58.8	58.8	21.057	0	114.82	3305100000	114
GNAS	Guanine nucleotide-binding protein G(s) subunit alpha isoforms short;Guanine nucleotide-binding protein G(s) subunit alpha isoforms XLas	P63092-3;P63092-2;P63092;P63092-4;Q5JWF2-2;Q5JWF2	P63092-3;P63092-2;P63092;P63092-4;Q5JWF2-2;Q5JWF2			0.0632076	0.097086	-0.160294	0.82933	0.802187	NaN	0.657051	-0.00175285	-0.10494	0.291842	0.473589	0.493015	NaN	0.227192	0.734583	2	2	1	5.3	5.3	2.4	44.179	0	14.586	635320000	20
CAPZA1	F-actin-capping protein subunit alpha-1	P52907	P52907			0.0642033	-0.0123749	-0.0518284	0.774952	-0.255255	-0.0988655	-0.111712	0.145405	-0.141479	-0.167067	0.141211	0.20437	-0.0340176	-0.75375	0.279713	5	5	4	25.9	25.9	22.4	32.922	0	45.341	450010000	26
SYNCRIP	Heterogeneous nuclear ribonucleoprotein Q	O60506-4;O60506-3;O60506-2;O60506;O60506-5	O60506-4;O60506-3;O60506-2;O60506;O60506-5			0.0647456	-0.0197233	-0.0450223	0.372698	0.406897	0.381585	0.46276	1.66236	0.671561	0.660523	0.687113	0.19106	0.274899	0.136182	-0.369945	10	10	8	23.3	23.3	19.5	58.735	0	77.865	892090000	33
PLS3	Plastin-3	P13797-2;P13797;P13797-3;Q14651	P13797-2;P13797;P13797-3			0.0664686	0.121215	-0.187684	0.815698	1.04579	0.924947	0.0215524	0.26584	-0.152816	0.258977	0.308198	0.789939	0.281072	-0.119639	0.377611	17	17	14	31.6	31.6	26.6	69.35	0	166.38	4256000000	202
RAP1B;RAP1A	Ras-related protein Rap-1b;Ras-related protein Rap-1A;Ras-related protein Rap-1b-like protein	P61224-2;P61224-3;P62834;P61224;P61224-4;A6NIZ1	P61224-2;P61224-3;P62834;P61224;P61224-4;A6NIZ1			0.0679747	-0.0398362	-0.0281385	0.295212	NaN	-0.100398	0.136058	NaN	0.0462043	0.118319	-0.204675	-0.317312	NaN	NaN	0.182238	2	2	2	15.3	15.3	15.3	15.356	0	15.442	266840000	17
ACACA	Acetyl-CoA carboxylase 1;Biotin carboxylase	Q13085;Q13085-4;Q13085-2;O00763-3;O00763-2;O00763	Q13085;Q13085-4;Q13085-2			0.0681744	-0.105619	0.0374451	-0.928764	-0.142353	-0.396261	-1.06569	-1.34412	-1.51608	-1.18718	-1.7011	-1.83297	-1.84319	-1.38115	-1.37803	96	96	4	45.9	45.9	2.3	265.55	0	323.31	64416000000	1460
CBR1	Carbonyl reductase [NADPH] 1	P16152;P16152-2	P16152;P16152-2			0.0682386	-0.166634	0.0983957	0.725795	1.29068	1.36457	0.29017	0.196496	0.178941	0.302091	0.490915	0.0555604	0.492145	0.380254	0.727241	9	9	8	51.3	51.3	45.5	30.375	0	82.491	1326900000	76
TRIM28	Transcription intermediary factor 1-beta	Q13263;Q13263-2	Q13263;Q13263-2			0.0686925	0.16516	-0.233853	0.686878	0.587928	1.01083	-0.0111071	0.277189	0.218353	0.184152	0.253625	0.489463	0.210885	0.0584882	0.389306	21	21	21	35.3	35.3	35.3	88.549	0	209.32	4690400000	226
IQGAP1	Ras GTPase-activating-like protein IQGAP1	P46940;Q86VI3;Q13576-3;Q13576-2;Q13576	P46940			0.0695222	-0.00380961	-0.0657126	0.0366968	0.246805	0.184738	-0.147166	-0.134743	-0.11201	-0.00329653	0.00756963	0.211191	-0.0474707	0.0936006	0.17411	28	28	28	19.2	19.2	19.2	189.25	0	224.56	3126100000	258
SAMM50	Sorting and assembly machinery component 50 homolog	Q9Y512	Q9Y512			0.0695534	0.131098	-0.200651	0.862581	0.891998	1.29506	0.491997	0.676199	0.599037	0.753689	0.617519	1.0131	1.01986	0.722937	0.612165	6	6	6	11.7	11.7	11.7	51.976	0	36.611	314770000	20
BUB3	Mitotic checkpoint protein BUB3	O43684-2;O43684	O43684-2;O43684			0.0703882	-0.194432	0.124044	-0.140452	0.0634092	-0.264319	0.261638	0.0960878	-0.130644	-0.225737	-0.536513	-0.258944	0.356025	0.135415	0.0917352	9	9	9	31	31	31	36.954	0	73.321	997070000	86
PTBP1	Polypyrimidine tract-binding protein 1	P26599;P26599-2;P26599-3;O95758-1;O95758-6;O95758-2;O95758;O95758-5;O95758-4;O95758-7	P26599;P26599-2;P26599-3			0.0710278	0.0849552	-0.155983	1.04993	0.756672	1.13398	-0.30965	-0.015667	0.217657	0.448807	0.0796394	0.93502	0.814081	0.482574	0.510862	7	7	7	19.6	19.6	19.6	57.221	0	69.086	953800000	38
SPTAN1	Spectrin alpha chain, non-erythrocytic 1	Q13813-3;Q13813;Q13813-2	Q13813-3;Q13813;Q13813-2			0.071372	-0.071372	NaN	-0.680747	NaN	NaN	0.280658	0.825566	NaN	-0.242244	0.135156	0.690614	-0.198012	NaN	-0.829545	7	7	7	3.5	3.5	3.5	282.28	0	44.807	97625000	11
DLAT	Dihydrolipoyllysine-residue acetyltransferase component of pyruvate dehydrogenase complex, mitochondrial	P10515	P10515			0.0715466	NaN	-0.0715466	0.444862	NaN	NaN	0.0184917	NaN	-0.301313	0.46986	-0.00399017	0.0505104	0.108252	0.0310726	0.348856	3	3	3	5.4	5.4	5.4	68.996	0	16.851	178350000	18
CAPRIN1	Caprin-1	Q14444-2;Q14444	Q14444-2;Q14444			0.0723171	-0.0415611	-0.030756	-0.274632	NaN	-0.050108	-0.176014	-0.06353	-0.21409	-0.029438	-0.216776	-0.20359	NaN	-0.259623	-0.193821	2	2	2	3.3	3.3	3.3	76.861	0	15.303	184600000	21
PSMD14	26S proteasome non-ATPase regulatory subunit 14	O00487	O00487	+		0.0724039	NaN	-0.0724039	0.7487	NaN	NaN	0.216233	-0.285134	-0.38794	0.229491	0.194434	0.287652	NaN	NaN	0.242259	2	2	2	9.4	9.4	9.4	34.577	0	19.386	387780000	22
MCM5	DNA replication licensing factor MCM5	P33992	P33992			0.0726179	-0.175076	0.102458	1.12067	0.702815	1.10049	0.605974	0.446716	0.277318	0.274732	-0.161851	0.514386	0.231099	0.249891	1.22509	13	13	13	22.3	22.3	22.3	82.285	0	91.322	971660000	61
SF3B1	Splicing factor 3B subunit 1	O75533	O75533			0.0751336	-0.0882136	0.01308	0.411064	0.60176	0.157468	0.416364	0.485326	0.4313	0.353149	-0.0143706	-0.00451533	-0.43059	0.0690683	0.642663	11	11	11	10.7	10.7	10.7	145.83	0	74.154	414970000	45
PSME3	Proteasome activator complex subunit 3	P61289;P61289-3;P61289-2	P61289;P61289-3;P61289-2			0.0755596	-0.0958481	0.0202885	0.457762	0.340891	0.559494	-0.0129051	-0.327702	-0.0948524	0.296041	-0.102139	0.0193691	0.107578	-0.0755692	0.187759	5	5	5	21.7	21.7	21.7	29.506	0	47.902	425460000	23
HAT1	Histone acetyltransferase type B catalytic subunit	O14929-2;O14929	O14929-2;O14929			0.0761388	0.106225	-0.182364	NaN	0.350791	0.799018	0.579416	0.205106	-0.0290476	-0.0339381	-0.101937	0.242364	0.208383	0.538476	0.17378	2	2	2	9.3	9.3	9.3	39.786	0	45.01	396710000	20
COPA	Coatomer subunit alpha;Xenin;Proxenin	P53621;P53621-2	P53621;P53621-2			0.076458	-0.0611248	-0.0153332	0.0399151	0.262674	0.0310421	-0.0856953	0.410715	0.101196	-0.0997887	-0.0322704	-0.296783	0.232197	0.156874	0.0932636	15	15	15	14.6	14.6	14.6	138.34	0	114.72	1677400000	95
HSPA9	Stress-70 protein, mitochondrial	P38646	P38646			0.0765858	0.0931721	-0.169758	0.146164	0.584988	0.717804	-0.136494	0.0330696	0.0610332	0.0705109	0.0493679	0.259604	0.184872	-0.00819778	0.247162	26	25	25	44.2	43.2	43.2	73.68	0	305.63	8399800000	377
RPS8	40S ribosomal protein S8	P62241	P62241			0.076952	-0.0274849	-0.0494671	0.20162	-0.175694	0.13962	-0.370008	-0.397024	-0.72275	-0.552591	-0.155205	0.416977	0.190199	-0.299377	-0.196409	10	10	10	39.4	39.4	39.4	24.205	0	207.3	11200000000	179
CAPN1	Calpain-1 catalytic subunit	P07384	P07384			0.0774174	-0.248215	0.170797	0.313208	0.604002	0.403072	-0.323362	-0.306629	0.0513058	0.289268	0.481709	0.244997	-0.264112	0.382963	0.20013	5	5	5	6.4	6.4	6.4	81.889	0	29.142	283090000	26
RPS3	40S ribosomal protein S3	P23396;P23396-2	P23396;P23396-2			0.0774295	-0.130765	0.0533358	0.700429	0.31437	0.521521	0.446253	0.337893	0.279217	0.269631	0.119864	0.271502	0.437203	0.312115	0.543736	13	13	13	63.8	63.8	63.8	26.688	0	114.91	6095900000	155
MCM3	DNA replication licensing factor MCM3	P25205;P25205-2	P25205;P25205-2			0.0779622	-0.0859419	0.00797971	0.887611	1.06736	0.984683	0.484737	0.548311	0.591897	0.518504	0.255292	0.541292	0.374408	0.0584844	1.30648	15	15	15	21	21	21	90.98	0	93.893	927030000	51
MAPRE1	Microtubule-associated protein RP/EB family member 1	Q15691;Q9UPY8-2;Q9UPY8	Q15691			0.07809	0.15501	-0.2331	-0.54233	-1.73594	-0.575474	-0.220061	-0.109627	0.0961984	0.13816	0.700166	1.16974	0.563262	-0.359879	-0.0186469	12	12	12	55.2	55.2	55.2	29.999	0	129.38	3345700000	129
KIF5B	Kinesin-1 heavy chain	P33176;O60282;Q12840;O60282-2	P33176			0.0785427	-0.197624	0.119081	-0.414948	0.595715	-0.463228	0.556509	0.69508	0.283276	-0.0800247	0.21921	0.149317	-0.31691	-0.130865	0.0505962	16	16	16	20	20	20	109.68	0	106.98	762690000	46
HSP90AA1	Heat shock protein HSP 90-alpha	P07900;P07900-2;Q14568;Q58FG0;Q58FG1	P07900;P07900-2			0.078874	-0.0265338	-0.0523402	0.146108	0.343307	-0.0736853	0.231572	0.25085	0.254777	0.176923	0.287805	0.404081	0.365239	-0.15296	0.301793	37	22	22	45.9	28.8	28.8	84.659	0	323.31	16170000000	448
RPL17	60S ribosomal protein L17	P18621;P18621-3;P18621-2	P18621;P18621-3;P18621-2			0.080712	0.114281	-0.194993	-0.294389	-0.0718721	-0.778079	-0.0192312	-0.120479	-0.168744	-0.408201	0.00332705	-0.101142	0.302003	-0.42918	-0.28198	7	7	7	37	37	37	21.397	0	65.191	3396800000	104
RUVBL2	RuvB-like 2	Q9Y230;Q9Y230-2	Q9Y230;Q9Y230-2			0.0810954	0.183854	-0.264949	0.967465	1.11917	1.26461	0.775765	0.82671	0.462742	0.374787	0.393628	0.384932	0.822985	0.575761	0.943143	14	14	14	36.3	36.3	36.3	51.156	0	101.67	1718200000	87
CTNNA1	Catenin alpha-1	P35221;P35221-2;P35221-3;P26232-4;P26232-6;Q9UI47	P35221;P35221-2;P35221-3			0.0828959	0.0170142	-0.0999101	-0.385278	-0.346265	-0.493858	-0.276834	-0.153823	-0.129552	0.111705	-0.104101	0.168166	0.0378806	-0.0304559	-0.0972589	10	10	9	11.9	11.9	10.9	100.07	0	73.896	968580000	38
PPIA	Peptidyl-prolyl cis-trans isomerase A;Peptidyl-prolyl cis-trans isomerase A, N-terminally processed	P62937;P62937-2;P0DN26;A0A0B4J2A2;A0A075B767;A0A075B759;Q9Y536;F5H284;P0DN37	P62937;P62937-2			0.0836951	0.0519721	-0.135667	0.850186	0.866843	0.537551	0.152598	0.0565135	-0.061313	0.100144	-0.11478	0.451718	0.260447	0.408263	0.38255	10	10	10	53.3	53.3	53.3	18.012	0	193.22	10110000000	155
RPL9	60S ribosomal protein L9	P32969	P32969			0.0840219	-0.0878913	0.00386937	1.20349	0.931781	1.10676	0.0200876	-0.189591	-0.256001	0.54705	0.16694	0.367629	0.54306	0.103061	0.572339	5	5	5	26.6	26.6	26.6	21.863	0	45.943	1589300000	71
ARF1;ARF3	ADP-ribosylation factor 1;ADP-ribosylation factor 3	P84077;P61204;P61204-2	P84077;P61204;P61204-2			0.0850118	0.147313	-0.232325	0.190524	0.579391	0.89441	0.0831521	0.521785	0.323827	0.312478	0.321494	0.20067	0.247073	0.784625	0.424154	5	3	2	35.9	18.2	12.7	20.697	0	28.335	1182800000	56
DPP3	Dipeptidyl peptidase 3	Q9NY33-4;Q9NY33;Q9NY33-2	Q9NY33-4;Q9NY33			0.0869319	-0.0904783	0.0035464	-0.178922	NaN	-0.192571	0.154271	0.0855624	0.310517	-0.146655	0.312274	-0.187372	0.0560023	0.172301	0.124139	3	3	3	4.5	4.5	4.5	79.306	0	18.762	182680000	19
TAGLN2	Transgelin-2	P37802;P37802-2;Q9UI15	P37802;P37802-2			0.0871048	-0.139236	0.0521317	0.200235	-0.0950642	0.328047	-0.209869	-0.150047	-0.0138855	0.149792	0.046629	0.365055	0.0139561	-0.176849	0.0940742	11	11	11	63.3	63.3	63.3	22.391	0	169.15	7670100000	228
ATIC	Bifunctional purine biosynthesis protein PURH;Phosphoribosylaminoimidazolecarboxamide formyltransferase;IMP cyclohydrolase	P31939-2;P31939	P31939-2;P31939			0.0876732	-0.0678539	-0.0198193	1.02843	0.986498	0.694752	-0.0859699	0.193258	-0.0308037	-0.0982208	0.143547	0.410686	0.369715	0.313114	0.50787	16	16	16	36.2	36.2	36.2	64.523	0	157.48	2799000000	152
PDCD6IP	Programmed cell death 6-interacting protein	Q8WUM4;Q8WUM4-2;Q8WUM4-3	Q8WUM4;Q8WUM4-2			0.0894782	0.106709	-0.196187	0.506888	0.779584	0.508042	-0.0170396	0.17381	0.191622	0.193562	0.168809	0.361064	0.403918	0.318356	0.431271	14	14	14	18.2	18.2	18.2	96.022	0	105.77	1080200000	82
EEF1A1;EEF1A1P5	Elongation factor 1-alpha 1;Putative elongation factor 1-alpha-like 3	P68104;Q5VTE0;P68104-2	P68104;Q5VTE0;P68104-2			0.089749	0.0336539	-0.123403	0.166411	0.616597	0.2114	0.161519	-0.0166925	-0.0295595	0.267117	0.274512	0.28222	0.39211	0.0446135	0.457928	17	17	9	53	53	32.3	50.14	0	289.44	108440000000	456
RPL30	60S ribosomal protein L30	P62888	P62888			0.0916888	-0.25028	0.158591	0.965293	0.370063	0.441664	0.568377	1.34722	0.427886	0.142384	0.31738	0.12649	0.194367	NaN	-0.10123	4	4	4	39.1	39.1	39.1	12.784	0	27.326	327010000	27
NUDC	Nuclear migration protein nudC	Q9Y266	Q9Y266			0.0925617	0.0853348	-0.177896	-0.648403	-0.696039	-0.943657	-0.082325	-0.271662	0.49177	0.220493	0.244862	-0.280205	0.337353	-0.518299	-0.529568	8	8	8	26.6	26.6	26.6	38.242	0	60.558	889630000	64
IMMT	MICOS complex subunit MIC60	Q16891-2;Q16891;Q16891-4;Q16891-3	Q16891-2;Q16891;Q16891-4;Q16891-3			0.0929317	0.0933666	-0.186298	-0.911112	-1.18011	-0.731508	-0.485632	-0.13273	0.110441	-0.339256	0.327656	-0.152962	-0.274601	-0.021843	-0.210911	10	10	10	17.8	17.8	17.8	82.624	0	101.55	804710000	77
SRP14	Signal recognition particle 14 kDa protein	P37108	P37108			0.0943699	-0.192766	0.0983963	-0.119509	0.458742	NaN	-0.521671	-0.131571	0.146746	0.0457191	-0.0962086	0.00564003	0.0795383	NaN	0.223837	3	3	3	25.7	25.7	25.7	14.57	0	27.976	371850000	34
EIF4H	Eukaryotic translation initiation factor 4H	Q15056-2;Q15056	Q15056-2;Q15056			0.0955963	-0.0955963	NaN	-0.0319767	NaN	0.113886	0.118845	0.286871	0.250471	0.153439	0.630579	1.10232	0.956573	NaN	NaN	4	4	4	23.2	23.2	23.2	25.2	0	37.71	224200000	12
AP2B1	AP-2 complex subunit beta	P63010;P63010-2;P63010-3	P63010;P63010-2;P63010-3			0.0967821	-0.232701	0.135919	0.647437	0.381524	-0.000237147	-0.179671	-0.117682	-0.318333	-0.0333125	-0.187443	0.0432771	0.430011	0.00759443	0.469123	14	14	5	18.8	18.8	7.8	104.55	0	111.36	1500900000	113
CSE1L	Exportin-2	P55060-3;P55060;P55060-4;P55060-2	P55060-3;P55060;P55060-4			0.0978222	0.07761	-0.175432	0.316689	0.26532	0.367464	-0.189995	-0.108629	-0.23662	0.0271492	0.291998	0.26502	-0.282961	-0.124098	0.140297	23	23	23	24.1	24.1	24.1	107.78	0	275.14	5747600000	306
PYGB	Glycogen phosphorylase, brain form	P11216;P11217;P11217-2	P11216			0.0979258	-0.110328	0.0124022	0.317668	0.0947386	0.845322	0.0993945	0.529	-0.193523	-0.0193075	-0.45127	-0.00810369	0.0912158	-0.145467	0.468016	7	7	5	8.9	8.9	6.5	96.695	0	45.79	478730000	26
RPS24	40S ribosomal protein S24	P62847-2;P62847-3;P62847;P62847-4	P62847-2;P62847-3;P62847;P62847-4			0.098053	-0.098053	NaN	-0.487082	NaN	-1.63982	-1.33955	-1.14089	-1.14558	-0.96949	NaN	-0.30759	-0.334234	-1.1433	-0.732742	2	2	2	17.7	17.7	17.7	15.069	0	14.132	225100000	23
NARS	Asparagine--tRNA ligase, cytoplasmic	O43776;O43776-2	O43776			0.0982755	-0.156295	0.058019	0.708535	0.0135129	0.614101	0.0469659	0.257633	-0.47239	-0.123744	0.10284	0.266549	0.0574964	0.16324	-0.119012	9	9	9	16.6	16.6	16.6	62.942	0	80.168	921650000	55
RPL18A	60S ribosomal protein L18a	Q02543	Q02543			0.0985355	-0.170992	0.0724564	-0.0452309	-0.264984	0.200932	-0.226395	-0.307402	-0.368988	-0.0674248	-0.041399	0.187288	0.428852	-0.950125	0.214893	4	4	4	19.3	19.3	19.3	20.762	0	26.753	1502600000	63
KPNB1	Importin subunit beta-1	Q14974;Q14974-2	Q14974;Q14974-2			0.0995102	-0.0310173	-0.0684929	0.257103	0.423626	0.473433	-0.295338	-0.215656	-0.206999	0.295963	0.0939808	0.206627	0.259348	0.289127	0.449223	25	25	25	34.5	34.5	34.5	97.169	0	263.64	14272000000	439
COPB1	Coatomer subunit beta	P53618	P53618			0.10002	0.100163	-0.200183	0.121188	0.00595538	0.342065	-0.357684	-0.137405	-0.145068	0.0554892	0.0261141	0.0263678	0.518162	-0.152889	0.0251033	11	11	11	16.7	16.7	16.7	107.14	0	82.153	793980000	72
TARS	Threonine--tRNA ligase, cytoplasmic	P26639;P26639-2;A2RTX5-2;A2RTX5	P26639;P26639-2			0.100629	0.0850398	-0.185668	0.395066	0.388793	0.356631	-0.0105432	0.0243136	0.00501315	-0.262328	-0.0943044	-0.0216249	-0.018369	-0.470447	0.0391566	20	20	20	28.9	28.9	28.9	83.434	0	158.97	2536300000	198
RPL4	60S ribosomal protein L4	P36578	P36578			0.100984	-0.0206877	-0.0802962	0.565498	0.259193	0.543538	0.122915	0.103488	-0.239457	-0.258446	0.145089	0.829257	0.396938	0.00938352	0.342174	15	15	15	38.9	38.9	38.9	47.697	0	119.43	9109800000	179
RPL27A	60S ribosomal protein L27a	P46776	P46776			0.10124	0.00787099	-0.109111	-0.0253321	0.213689	-0.342225	-0.33943	-1.43243	-0.896363	-0.83626	-0.576878	0.14961	-0.667079	-1.06344	-0.778931	5	5	5	31.1	31.1	31.1	16.561	0	58.8	9491900000	64
SRP72	Signal recognition particle subunit SRP72	O76094;O76094-2	O76094;O76094-2			0.103902	0.113521	-0.217423	-0.946454	-0.775458	-0.682326	0.250434	0.585365	0.69473	-0.517005	-0.319426	NaN	-0.5708	NaN	-0.418997	5	5	5	7.3	7.3	7.3	74.605	0	33.196	198280000	14
IPO5	Importin-5	O00410;O00410-3;O00410-2;O60518	O00410;O00410-3;O00410-2			0.105232	0.0225735	-0.127806	0.106291	1.08917	0.144424	-0.32399	-0.517134	-0.374458	0.468142	0.00199318	0.39975	0.0986786	-0.298218	0.407949	17	17	17	20.1	20.1	20.1	123.63	0	158.13	2468700000	112
GOT2	Aspartate aminotransferase, mitochondrial	P00505;P00505-2	P00505;P00505-2			0.105498	0.0771472	-0.182645	0.157803	-0.213285	-0.109569	0.22395	-0.188548	-0.119378	-0.000443776	0.0621134	0.389765	-0.345023	0.0241629	0.22741	14	14	14	32.3	32.3	32.3	47.517	0	167.12	3047500000	157
ARHGDIA	Rho GDP-dissociation inhibitor 1	P52565;P52565-2	P52565;P52565-2			0.105766	0.391687	-0.497452	0.53835	-0.40475	0.319221	-0.0501963	0.19317	0.231719	0.280769	-0.0830924	0.58666	0.816402	0.131412	0.453275	6	6	6	26	26	26	23.207	0	46.766	1041700000	55
YWHAB	14-3-3 protein beta/alpha;14-3-3 protein beta/alpha, N-terminally processed	P31946-2;P31946	P31946-2;P31946			0.106445	0.0260983	-0.132544	-0.28805	-0.967688	-0.858349	0.0963421	0.0151463	-0.015749	0.338764	0.166586	0.296366	0.233109	-0.220179	-0.106871	8	5	4	39.8	28.7	25	27.85	0	74.778	2709800000	65
PSMA2	Proteasome subunit alpha type-2	P25787	P25787			0.106555	NaN	-0.106555	-0.136558	0.348584	0.846574	0.173957	0.577836	0.434632	0.623359	0.366477	0.734031	NaN	0.289662	0.662055	6	6	6	38	38	38	25.898	0	38.023	622540000	23
RPS27L	40S ribosomal protein S27-like	Q71UM5	Q71UM5			0.106591	-0.0198205	-0.0867704	-0.14615	1.46052	1.07464	0.520653	-0.382757	0.336648	0.250748	0.329991	0.11731	0.0763346	0.575396	0.731011	3	3	1	38.1	38.1	13.1	9.4771	0	27.967	913290000	47
UBA52;RPS27A;UBB;UBC	Ubiquitin-60S ribosomal protein L40;Ubiquitin;60S ribosomal protein L40;Ubiquitin-40S ribosomal protein S27a;Ubiquitin;40S ribosomal protein S27a;Polyubiquitin-B;Ubiquitin;Polyubiquitin-C;Ubiquitin	P62987;P62979;P0CG47;P0CG48	P62987;P62979;P0CG47;P0CG48			0.107477	-0.166174	0.0586967	1.00453	0.578218	1.07569	0.614906	0.690067	0.157663	0.604462	0.422848	0.70838	0.317215	0.486691	0.947741	4	4	4	36.7	36.7	36.7	14.728	0	56.927	3713300000	90
RPS25	40S ribosomal protein S25	P62851	P62851			0.107675	0.158685	-0.26636	0.375898	-0.201255	0.0561441	-0.237128	-0.00385348	-0.269238	0.195495	0.483535	0.119449	-0.0659587	-0.0304724	0.576415	5	5	5	29.6	29.6	29.6	13.742	0	38.866	2038800000	63
USP5	Ubiquitin carboxyl-terminal hydrolase 5	P45974-2;P45974	P45974-2;P45974	+		0.1084	0.170107	-0.278507	-0.0765266	0.582123	0.436333	0.141924	0.30674	0.525124	0.440983	0.339743	0.401136	0.17252	0.339527	0.114233	11	11	11	20.5	20.5	20.5	93.307	0	78.725	849220000	88
CLTC	Clathrin heavy chain 1	Q00610-2;Q00610;P53675-2;P53675	Q00610-2;Q00610			0.109512	0.0301666	-0.139679	0.345373	0.839565	0.467417	0.0327835	0.201927	-0.162779	0.00767136	0.00793839	0.25956	0.294554	-0.274471	0.322792	41	41	41	30.8	30.8	30.8	187.89	0	323.31	14934000000	608
GPI	Glucose-6-phosphate isomerase	P06744;P06744-2;CON__Q3ZBD7;Q8N196	P06744;P06744-2			0.11057	0.00207392	-0.112644	0.33146	-0.140422	0.422902	0.211472	0.269517	0.242947	0.366061	0.375294	0.294005	-0.0797189	0.383565	0.42941	16	16	16	35.8	35.8	35.8	63.146	0	288.93	9504800000	267
FLNB	Filamin-B	O75369-2;O75369-9;O75369;O75369-8;O75369-6;O75369-3;O75369-5;O75369-4;O75369-7	O75369-2;O75369-9;O75369;O75369-8;O75369-6;O75369-3;O75369-5;O75369-4;O75369-7			0.110996	-0.207923	0.096927	-0.4518	NaN	0.0261796	-0.258809	-0.151539	-0.0755622	-0.51991	-0.363827	-0.643641	-0.265225	NaN	-0.443968	15	9	9	6.7	4.7	4.7	275.66	0	53.223	185510000	20
YWHAE	14-3-3 protein epsilon	P62258;P62258-2	P62258;P62258-2			0.113742	-0.195382	0.0816409	0.130248	-0.220615	-0.179912	-0.0848287	0.107403	0.1631	-0.104171	0.0249335	0.269677	0.232011	-0.270585	0.10842	16	16	14	66.7	66.7	59.6	29.174	0	316.09	23393000000	387
NPM1	Nucleophosmin	P06748-2;P06748;P06748-3	P06748-2;P06748;P06748-3			0.113834	-0.223338	0.109504	0.152015	-0.0286624	-0.627234	0.0917371	-0.152383	0.194429	0.154662	-0.0818679	-0.0233523	-0.107165	0.0842965	0.261522	6	6	6	21.5	21.5	21.5	29.464	0	52	2395900000	68
RPL39P5;RPL39	Putative 60S ribosomal protein L39-like 5;60S ribosomal protein L39	Q59GN2;P62891	Q59GN2;P62891			0.114011	-0.271485	0.157474	-0.953557	NaN	-0.279772	-1.03354	-1.24369	-1.45021	0.14026	-1.32158	-1.05233	NaN	-1.76515	-1.38873	3	3	3	23.5	23.5	23.5	6.3225	0	25.846	7688500000	55
COPB2	Coatomer subunit beta	P35606-2;P35606	P35606-2;P35606			0.114621	0.00399145	-0.118613	0.401344	0.41825	0.180879	-0.18731	-0.108954	0.0666192	-0.00305239	-0.363778	-0.336129	-0.368235	-0.200646	0.164054	11	11	11	14.3	14.3	14.3	99.045	0	79.519	970610000	77
ACO2	Aconitate hydratase, mitochondrial	Q99798	Q99798			0.11856	-0.149415	0.0308558	0.553431	0.556737	0.199465	0.312089	0.403634	0.0477797	0.491643	-0.0932783	0.0564944	NaN	0.520508	0.506188	6	6	6	9.5	9.5	9.5	85.424	0	37.502	427390000	17
IDI1	Isopentenyl-diphosphate Delta-isomerase 1	Q13907;Q13907-2	Q13907;Q13907-2			0.119303	-0.0743942	-0.0449085	0.331896	0.447092	0.597965	0.101751	0.0898418	0.243675	-0.0335388	0.193678	0.585594	0.231421	-0.200197	0.560253	4	4	4	18.9	18.9	18.9	26.319	0	27.692	238660000	31
HCFC1	Host cell factor 1;HCF N-terminal chain 1;HCF N-terminal chain 2;HCF N-terminal chain 3;HCF N-terminal chain 4;HCF N-terminal chain 5;HCF N-terminal chain 6;HCF C-terminal chain 1;HCF C-terminal chain 2;HCF C-terminal chain 3;HCF C-terminal chain 4;HCF C-terminal chain 5;HCF C-terminal chain 6	P51610-2;P51610;P51610-4;P51610-3;Q9Y5Z7	P51610-2;P51610;P51610-4;P51610-3			0.120008	0.093029	-0.213037	-0.834721	-0.399611	NaN	0.126686	0.0374298	0.446949	-0.171509	-0.197504	-0.0759239	-0.182405	NaN	-0.470148	5	5	5	2.6	2.6	2.6	201.85	0	30.732	130280000	21
LRPPRC	Leucine-rich PPR motif-containing protein, mitochondrial	P42704	P42704			0.120498	0.173461	-0.293959	0.28453	-0.078406	0.228261	-0.136674	0.0984224	-0.158492	0.100499	0.182218	0.276283	0.175828	-0.0916258	0.22474	31	31	31	26.1	26.1	26.1	157.9	0	248.19	3745300000	255
PPIB	Peptidyl-prolyl cis-trans isomerase B	P23284	P23284			0.12092	0.0629692	-0.183889	0.915552	0.0713253	0.132023	0.0545959	0.0182552	0.116407	0.481918	0.47817	1.27914	0.838696	0.210791	0.710981	8	8	8	39.8	39.8	39.8	23.742	0	59.717	1574300000	62
SNRNP70	U1 small nuclear ribonucleoprotein 70 kDa	P08621;P08621-2;P08621-3;P08621-4	P08621;P08621-2;P08621-3			0.12455	0.219382	-0.343932	-0.805143	-1.67165	-1.61111	-0.37305	-0.0437463	-0.496448	0.161967	-0.361352	0.0382544	-0.152877	-0.623475	-0.372438	15	15	15	38.2	38.2	38.2	51.556	0	139.83	3727500000	198
MCM6	DNA replication licensing factor MCM6	Q14566	Q14566			0.124691	-0.15469	0.0299988	0.795616	0.221832	0.0165825	0.727489	0.69524	0.457653	0.33601	0.0484943	0.263041	-0.0816154	0.559689	0.529078	15	15	15	21.2	21.2	21.2	92.888	0	106.57	963670000	64
AARS	Alanine--tRNA ligase, cytoplasmic	P49588;P49588-2	P49588;P49588-2			0.124944	-0.268948	0.144004	-0.579049	-0.622779	-0.709826	0.263845	0.206292	0.204719	0.0676874	0.0594133	-0.0563304	-0.0942217	0.149041	-0.0547568	12	12	12	13.7	13.7	13.7	106.81	0	82.945	928270000	86
IDH1	Isocitrate dehydrogenase [NADP] cytoplasmic	O75874	O75874			0.126173	-0.000579834	-0.125593	0.034193	NaN	-0.078043	0.0238495	0.0845947	0.12056	-0.267206	-0.181969	0.34693	0.251434	0.0251675	-0.289043	7	7	6	18.8	18.8	16.7	46.659	0	57.194	505090000	49
SRSF1	Serine/arginine-rich splicing factor 1	Q07955;Q07955-3;Q07955-2	Q07955;Q07955-3;Q07955-2			0.126529	-0.622552	0.496023	-0.953723	-0.538562	NaN	-0.0247389	-0.0998446	-0.646733	0.549383	-0.830212	-0.37715	-0.583289	-0.519587	-0.985219	6	6	6	19.4	19.4	19.4	27.744	0	49.38	478260000	54
GLUD1;GLUD2	Glutamate dehydrogenase 1, mitochondrial;Glutamate dehydrogenase 2, mitochondrial	P00367;P00367-3;P00367-2;P49448	P00367;P00367-3;P00367-2;P49448			0.126789	-0.10652	-0.0202694	0.0429363	0.151455	0.118435	-0.0040741	-0.510382	-0.146412	-0.107271	0.564304	0.550581	0.285498	-0.598888	0.213192	9	9	9	17.9	17.9	17.9	61.397	0	68.781	1009700000	49
RBM39	RNA-binding protein 39	Q14498-3;Q14498-2;Q14498	Q14498-3;Q14498-2;Q14498			0.126856	-0.187055	0.0601985	-1.09552	-0.560743	-1.10215	-0.164792	-0.407853	-0.545509	-0.446122	-0.255056	-1.0171	-0.217202	NaN	-0.289951	5	5	5	11	11	11	57.089	0	48.804	424380000	45
HIST1H1C;HIST1H1E;HIST1H1D	Histone H1.2;Histone H1.4;Histone H1.3	P16403;P10412;P16402;P22492;Q02539	P16403;P10412;P16402			0.127425	0.214039	-0.341464	-0.601388	NaN	-1.7556	-0.786273	-0.87071	-1.16536	-0.117997	-0.637464	0.576188	0.28563	1.08794	0.224709	5	5	5	16	16	16	21.364	0	34.551	757240000	41
SLC25A11	Mitochondrial 2-oxoglutarate/malate carrier protein	Q02978;Q02978-2	Q02978;Q02978-2			0.128373	0.0705687	-0.198942	0.184104	0.595286	0.479537	0.00780741	0.144049	-0.0430787	0.207553	-0.228654	0.148678	0.286603	-0.0879167	0.143809	7	7	7	24.8	24.8	24.8	34.061	0	49.778	502600000	54
BZW1	Basic leucine zipper and W2 domain-containing protein 1	Q7L1Q6-2;Q7L1Q6;Q7L1Q6-4;Q7L1Q6-3	Q7L1Q6-2;Q7L1Q6;Q7L1Q6-4;Q7L1Q6-3			0.128585	0.0884501	-0.217035	-0.337615	-0.146734	-0.0263437	-0.473014	-0.179504	0.0914141	-0.157668	0.308757	-0.466306	0.274436	-0.85284	-0.395599	6	6	5	14.4	14.4	12.5	40.538	0	35.526	276040000	32
BRAT1	BRCA1-associated ATM activator 1	Q6PJG6;Q6PJG6-2;Q6PJG6-3	Q6PJG6			0.128754	NaN	-0.128754	0.366352	NaN	0.664755	0.983023	0.720339	0.653864	1.25729	0.898478	1.12856	0.526072	0.396851	0.598932	6	6	6	9.4	9.4	9.4	88.118	0	36.127	241070000	22
PCCA	Propionyl-CoA carboxylase alpha chain, mitochondrial	P05165-2;P05165;P05165-3	P05165-2;P05165;P05165-3			0.129814	-0.315063	0.185249	-0.913647	-0.289017	-0.384474	-0.820232	-1.29272	-1.25735	-0.985453	-1.33705	-1.62904	-1.42337	-0.913349	-1.20114	32	32	32	50	50	50	77.047	0	323.31	19778000000	561
ARPC1A	Actin-related protein 2/3 complex subunit 1A	Q92747;Q92747-2	Q92747;Q92747-2			0.130122	-0.0230338	-0.107089	0.876388	-0.23103	-0.40836	0.51033	0.695764	0.112617	0.777372	-0.0445697	0.222486	-0.052199	0.282573	0.539638	7	7	7	23	23	23	41.569	0	44.848	484200000	22
RUVBL1	RuvB-like 1	Q9Y265;Q9Y265-2	Q9Y265;Q9Y265-2			0.130445	0.0188135	-0.149258	0.922923	0.766624	1.63376	0.43925	0.364448	0.462245	0.455592	0.527839	0.101999	0.453346	1.18195	1.1347	11	11	11	31.6	31.6	31.6	50.227	0	83.662	1327200000	91
BLVRA	Biliverdin reductase A	P53004	P53004			0.131772	-0.132562	0.000790278	0.354491	NaN	0.014136	0.541207	0.644511	NaN	0.0852324	0.141972	0.249163	NaN	NaN	0.258322	4	4	4	13.9	13.9	13.9	33.428	0	35.315	256640000	35
NUDT5	ADP-sugar pyrophosphatase	Q9UKK9	Q9UKK9			0.132152	0.497941	-0.630093	0.749652	0.433961	0.222967	0.23804	0.131418	0.239572	0.253833	0.0170778	-0.406512	0.309507	0.33187	0.607194	11	11	11	52.1	52.1	52.1	24.327	0	83.062	1141400000	67
CDKN2A	Cyclin-dependent kinase inhibitor 2A	P42771;P42771-2;P42771-4;P42771-3;P42772	P42771;P42771-2;P42771-4			0.133529	-0.100262	-0.0332667	-0.856867	-0.210467	-0.432208	-0.682236	-0.613204	-0.772528	-0.387705	NaN	0.118728	NaN	-0.806298	0.009456	4	4	4	34	34	34	16.532	0	27.968	560090000	18
GLO1	Lactoylglutathione lyase	Q04760-2;Q04760	Q04760-2;Q04760			0.133617	0.0826817	-0.216299	0.594345	0.215155	0.0146084	-0.366035	-0.0833721	-0.344599	-0.0662994	0.281538	0.155052	-0.0976543	-0.306179	0.175806	6	6	6	24.3	24.3	24.3	19.043	0	59.356	2060800000	96
EEF1B2	Elongation factor 1-beta	P24534	P24534			0.133688	0.0573273	-0.191015	0.432217	0.435369	0.811327	-0.0765553	-0.0661659	-0.285784	0.272011	0.686071	0.699903	0.843048	0.238621	0.644833	4	4	4	24.4	24.4	24.4	24.763	0	87.422	3110000000	40
NPEPPS	Puromycin-sensitive aminopeptidase	P55786;P55786-2;A6NEC2;A6NEC2-3;A6NEC2-2	P55786;P55786-2			0.134172	-0.00836563	-0.125807	0.597628	0.591488	0.594913	0.0235977	0.0603771	0.00756836	0.0817051	0.0794048	0.149878	0.384081	0.0890121	0.524273	21	21	21	25.7	25.7	25.7	103.28	0	151.64	34099000000	235
ACTB;ACTG1	Actin, cytoplasmic 1;Actin, cytoplasmic 1, N-terminally processed;Actin, cytoplasmic 2;Actin, cytoplasmic 2, N-terminally processed	P60709;P63261;Q6S8J3;P63267-2;A5A3E0;P0CG38;Q562R1;P0CG39	P60709;P63261			0.134453	-0.0895379	-0.0449155	-0.0308011	0.246434	0.500878	0.0624568	0.00634257	-0.0420392	-0.260259	-0.256622	-0.00744756	-0.195402	-0.142631	0.112748	20	20	7	62.9	62.9	32	41.736	0	323.31	116410000000	879
SF3B2	Splicing factor 3B subunit 2	Q13435	Q13435			0.13516	0.20739	-0.34255	-0.412153	NaN	-0.707508	0.265987	0.325157	0.397911	0.392586	0.493019	0.37285	0.433956	-0.213215	0.795778	6	6	6	7.4	7.4	7.4	100.23	0	39.094	720190000	25
DDX39B	Spliceosome RNA helicase DDX39B	Q13838;Q13838-2	Q13838;Q13838-2			0.135232	0.00946744	-0.1447	1.18764	1.74377	1.38828	0.426124	0.593942	0.49619	0.796502	0.420526	0.320424	0.915157	0.703142	0.963752	12	12	3	29.7	29.7	8.9	48.991	0	108.74	3956200000	174
SLC1A5	Neutral amino acid transporter B(0)	Q15758;Q15758-3;Q15758-2	Q15758			0.13526	0.208567	-0.343828	0.250905	1.54777	1.89029	0.897978	1.27966	1.36918	1.01576	1.58229	1.17739	1.01796	0.444649	1.5564	5	5	5	10.2	10.2	10.2	56.598	0	49.181	355060000	55
MCM7	DNA replication licensing factor MCM7	P33993;P33993-3;P33993-2	P33993;P33993-3			0.135458	-0.214283	0.078825	0.440718	0.18586	0.461781	0.143099	0.109903	0.0894222	0.522045	-0.0178299	0.666868	0.216923	0.542652	0.4067	15	15	15	28.2	28.2	28.2	81.307	0	108.25	1406700000	101
RPL21	60S ribosomal protein L21	P46778	P46778			0.1359	0.0201626	-0.156063	0.183451	-0.379032	-0.587637	-0.463102	-0.722683	-0.789865	-0.610565	-0.702368	0.0505695	-0.0567589	-0.536348	-0.312798	6	6	6	38.1	38.1	38.1	18.565	0	42.549	2862400000	74
TLN1	Talin-1	Q9Y490;Q9Y4G6	Q9Y490			0.135949	0.095054	-0.231003	-0.317029	-0.778935	-0.35991	-0.128039	-0.203561	-0.33873	-0.299941	0.113075	0.297181	-0.025828	-0.046025	-0.255107	46	46	46	24.4	24.4	24.4	269.76	0	323.31	4198800000	372
CKAP5	Cytoskeleton-associated protein 5	Q14008-2;Q14008;Q14008-3	Q14008-2;Q14008;Q14008-3			0.138119	-0.17724	0.0391204	0.301968	0.573552	0.201512	-0.403495	0.0634696	-0.362003	-0.00183233	-0.244691	-0.152822	0.150124	0.709006	0.00276629	12	12	12	7.3	7.3	7.3	218.52	0	82.609	517650000	65
HSPA1B;HSPA1A	Heat shock 70 kDa protein 1B;Heat shock 70 kDa protein 1A	P0DMV9;P0DMV8;P0DMV8-2	P0DMV9;P0DMV8;P0DMV8-2			0.138494	0.0101509	-0.148645	0.19532	0.456734	0.374134	0.081377	0.136003	0.147306	0.178583	0.189762	0.553637	-0.0817566	0.156118	0.0807705	28	28	15	52.9	52.9	26.4	70.051	0	323.31	76864000000	636
PRPS1;PRPS1L1	Ribose-phosphate pyrophosphokinase 1;Ribose-phosphate pyrophosphokinase 3	P60891;P60891-2;P21108	P60891;P60891-2;P21108			0.139814	-0.055886	-0.0839278	NaN	NaN	NaN	0.0824998	0.149106	-0.0109317	NaN	-0.383818	-0.238581	-0.218981	-0.211934	-0.0418173	7	2	2	22	4.7	4.7	34.834	0.00087184	11.351	117980000	13
UPF1	Regulator of nonsense transcripts 1	Q92900-2;Q92900	Q92900-2;Q92900			0.140484	-0.0240033	-0.116481	-0.279765	-0.573814	-0.474588	0.210704	-0.00544294	0.465855	-0.169723	-0.0162786	-0.192073	-0.285871	-0.895458	0.032643	6	6	6	7.6	7.6	7.6	123.03	0	40.79	391660000	19
EIF4A3	Eukaryotic initiation factor 4A-III;Eukaryotic initiation factor 4A-III, N-terminally processed	P38919	P38919			0.140682	0.0156663	-0.156348	-0.163325	-0.124177	-0.0279662	0.20063	0.570272	0.314298	0.212903	0.199882	0.0327123	0.0102838	0.294507	0.0851491	15	11	11	31.1	25.3	25.3	46.871	0	76.832	994320000	90
HNRNPL	Heterogeneous nuclear ribonucleoprotein L	P14866;P14866-2	P14866;P14866-2			0.140757	-0.187129	0.0463721	-0.176578	NaN	NaN	-0.264398	0.62321	-0.266324	0.401995	0.385699	0.137261	-0.997258	-0.583751	-1.1879	8	8	8	22.9	22.9	22.9	64.132	0	63.885	414090000	38
HSP90B1	Endoplasmin	P14625;Q58FF3	P14625			0.141724	0.102873	-0.244596	0.385107	0.640322	0.530897	-0.0564251	0.137424	-0.0141964	0.05093	0.345737	0.58872	0.219027	0.19651	0.40642	26	24	24	38	36.2	36.2	92.468	0	254.31	10926000000	326
GSR	Glutathione reductase, mitochondrial	P00390-5;P00390-4;P00390-2;P00390-3;P00390	P00390-5;P00390-4;P00390-2;P00390-3;P00390			0.141807	-0.143767	0.00196012	0.930213	0.582633	0.935104	0.30503	0.462453	0.357877	0.0180562	0.225347	-0.24828	0.469634	0.144653	0.59978	5	5	5	15	15	15	47.267	0	35.896	523830000	26
CBX3	Chromobox protein homolog 3	Q13185;P83916	Q13185			0.14238	-0.0387783	-0.103601	0.390787	0.987221	0.283516	-0.112444	0.407503	0.184546	0.0632038	0.278938	0.9053	0.562241	0.638186	0.993792	4	4	4	23.5	23.5	23.5	20.811	0	34.05	757390000	53
STIP1	Stress-induced-phosphoprotein 1	P31948;P31948-2;P31948-3	P31948;P31948-2;P31948-3			0.145507	-0.0154947	-0.130012	0.102069	-0.44407	0.0344416	-0.0450433	0.084664	-0.0851606	0.0181586	0.134926	-0.0173295	-0.03873	0.0204589	-0.114969	22	22	22	39.4	39.4	39.4	62.639	0	157.81	4498300000	245
ANP32A	Acidic leucine-rich nuclear phosphoprotein 32 family member A	P39687;O95626;O43423	P39687			0.145773	0.174099	-0.319872	0.0840912	-0.265261	-0.257866	0.0893307	0.00847435	-0.0643539	-0.0898705	-0.18424	-0.00870132	0.204752	-0.0980473	0.488899	6	6	5	20.1	20.1	14.9	28.585	0	44.624	999720000	65
COPG1	Coatomer subunit gamma-1	Q9Y678	Q9Y678			0.147685	0.0161044	-0.163789	0.811982	1.92297	-0.594049	0.579566	-0.0884622	0.321257	0.280427	-0.456231	0.0311839	1.34742	0.0232455	0.0224959	6	6	5	8	8	6.6	97.717	0	37.871	323610000	22
RPL10A	60S ribosomal protein L10a	P62906	P62906			0.147891	-0.0915407	-0.0563501	0.163436	0.63927	0.574258	-0.163884	0.0261294	0.249575	0.474541	0.258885	0.119519	0.137162	0.534081	0.481915	6	6	6	26.3	26.3	26.3	24.831	0	43.671	1509900000	86
ATP5J2	ATP synthase subunit f, mitochondrial	P56134-4;P56134-3;P56134-2;P56134	P56134-4;P56134-3;P56134-2;P56134			0.148206	0.000201543	-0.148408	-0.137145	1.11563	1.19553	-0.514977	-0.0854441	0.0981744	0.124879	0.493005	0.117894	0.140756	-0.0669963	1.13313	2	2	2	49	49	49	5.7407	0	15.267	210460000	33
SDHA	Succinate dehydrogenase [ubiquinone] flavoprotein subunit, mitochondrial	P31040-3;P31040-2;P31040	P31040-3;P31040-2;P31040			0.148754	-0.0752811	-0.073473	-0.251038	-0.44058	-0.595434	-0.0435581	0.180717	-0.0374565	0.101372	-0.388763	-0.436983	-0.370584	0.890768	-0.240393	4	4	4	10.2	10.2	10.2	56.65	0	32.309	488550000	42
DPYSL3	Dihydropyrimidinase-related protein 3	Q14195-2;Q14195	Q14195-2			0.149865	-0.143904	-0.0059611	-0.863732	NaN	NaN	0.538514	0.257867	0.389688	-0.00800959	0.326681	-0.148801	-0.417292	NaN	0.250259	5	4	4	8	6.9	6.9	73.91	0	28.671	161910000	14
XPO1	Exportin-1	O14980	O14980			0.149926	-0.00923793	-0.140689	0.497341	0.877506	0.611356	-0.00630824	-0.189522	-0.212233	0.174232	-0.0159556	0.20922	0.129649	0.074714	0.507331	22	22	22	23.3	23.3	23.3	123.38	0	165.13	3531400000	234
EIF3D	Eukaryotic translation initiation factor 3 subunit D	O15371-2;O15371-3;O15371	O15371-2;O15371-3;O15371			0.151646	-0.0881577	-0.063488	0.285551	-0.68968	0.293602	0.211	0.0553589	0.252697	-0.436729	0.270086	-0.306667	0.382668	-0.628811	0.381596	6	6	6	10.8	10.8	10.8	58.14	0	41.866	690520000	58
XRCC5	X-ray repair cross-complementing protein 5	P13010	P13010			0.153505	-0.0555369	-0.0979678	0.602651	0.653802	0.973609	0.36264	0.397662	0.347308	0.422574	0.494832	0.739497	0.317989	0.562089	0.224859	16	16	16	25	25	25	82.704	0	169.98	4075600000	163
HDAC2	Histone deacetylase 2	Q92769-3;Q92769;Q13547	Q92769-3;Q92769			0.153697	-0.228116	0.0744197	-0.1408	-0.653529	-1.15277	0.437913	0.443892	-0.15775	0.378903	-0.129684	0.0177561	0.0594241	-0.133033	-0.177883	4	4	4	12.4	12.4	12.4	51.998	0	30.795	363980000	38
CUL4B;CUL4A	Cullin-4B;Cullin-4A	Q13620-3;Q13620-1;Q13620;Q13619-2;Q13619	Q13620-3;Q13620-1;Q13620;Q13619-2;Q13619			0.154353	-0.0764949	-0.0778586	0.605233	0.624456	0.651037	-0.447291	0.138656	0.146722	0.346967	0.24269	-0.478703	-0.171176	0.328788	0.325813	6	6	6	9.8	9.8	9.8	84.016	0	43.118	321980000	42
GARS	Glycine--tRNA ligase	P41250	P41250			0.15503	-0.178893	0.0238635	0.325019	-0.33813	-0.38144	0.232485	0.232485	0.293305	0.209851	0.0456244	0.174578	0.402047	0.0659796	-0.194015	10	10	10	13.3	13.3	13.3	83.165	0	66.537	676090000	64
SERPINH1	Serpin H1	P50454	P50454			0.155703	0.132001	-0.287704	0.780764	0.367095	0.97279	0.363928	1.40533	0.421372	0.32441	0.438994	0.211272	0.375756	0.456332	0.647181	9	9	9	34.2	34.2	34.2	46.44	0	104.92	1705200000	95
TPI1	Triosephosphate isomerase	P60174-1;P60174;P60174-4	P60174-1;P60174;P60174-4			0.156559	-0.0497589	-0.1068	-0.0304165	0.0956554	0.209082	-0.260044	-0.421932	-0.279831	0.0325089	0.131832	0.10001	-0.0311203	-0.232792	0.179062	14	14	14	66.7	66.7	66.7	26.669	0	290.25	15614000000	340
ANP32B	Acidic leucine-rich nuclear phosphoprotein 32 family member B	Q92688-2;Q92688	Q92688-2;Q92688			0.159975	0.0972672	-0.257242	0.174931	-0.67639	0.999443	-0.0614433	-0.294073	-0.43203	-0.0407639	0.340305	0.537046	0.065403	-0.276817	0.249514	5	4	4	28.7	22.1	22.1	22.276	0	27.924	945280000	54
EIF3B	Eukaryotic translation initiation factor 3 subunit B	P55884;P55884-2	P55884;P55884-2			0.161946	-0.315618	0.153672	0.581164	0.0801322	0.690379	0.620858	0.409234	0.213311	0.222306	0.418152	0.480612	-0.183269	0.028443	0.52678	12	12	12	17.8	17.8	17.8	92.48	0	91.47	1025500000	84
PFKL	ATP-dependent 6-phosphofructokinase, liver type	P17858;P17858-2	P17858;P17858-2			0.164369	-0.433951	0.269582	0.449203	0.256517	0.390674	0.521814	0.181375	0.0901941	-0.199061	NaN	-0.0688101	-0.117064	0.485689	1.18117	8	5	5	12.2	7.4	7.4	85.018	0	33.408	566180000	7
PAICS	Multifunctional protein ADE2;Phosphoribosylaminoimidazole-succinocarboxamide synthase;Phosphoribosylaminoimidazole carboxylase	P22234;P22234-2	P22234;P22234-2			0.167063	-0.104614	-0.0624485	0.730255	0.9571	0.949993	-0.167385	-0.0609627	-0.0731087	0.266405	0.0455093	0.435575	0.118254	0.43404	0.365768	12	12	12	26.6	26.6	26.6	47.079	0	104.36	2081600000	162
API5	Apoptosis inhibitor 5	Q9BZZ5-3;Q9BZZ5-2;Q9BZZ5;Q9BZZ5-6;Q9BZZ5-5;Q9BZZ5-1	Q9BZZ5-3;Q9BZZ5-2;Q9BZZ5;Q9BZZ5-6;Q9BZZ5-5			0.167566	0.234905	-0.402472	0.399364	0.0626411	-0.180315	-0.240368	-0.484491	-0.549711	0.0018959	-0.365437	0.125389	-0.368299	-0.200729	-0.145796	6	6	6	14.6	14.6	14.6	50.309	0	43.857	791630000	58
PSMD13	26S proteasome non-ATPase regulatory subunit 13	Q9UNM6;Q9UNM6-2	Q9UNM6;Q9UNM6-2			0.168226	-0.19808	0.0298538	0.0762501	0.261019	0.498089	-0.196135	-0.462219	-0.172585	0.16258	0.0504913	0.404892	-0.0966091	-0.15941	-0.00983429	9	9	9	29.5	29.5	29.5	42.945	0	67.899	1145900000	68
CAND1	Cullin-associated NEDD8-dissociated protein 1	Q86VP6;Q86VP6-2;Q86VP6-3;O75155-2;O75155	Q86VP6;Q86VP6-2			0.170285	0.0174052	-0.18769	-0.115131	0.124467	0.165671	-0.19713	-0.228135	-0.244388	0.0262343	-0.175134	-0.196725	-0.235566	0.013581	0.138945	28	28	28	25.3	25.3	25.3	136.37	0	255.42	8745100000	426
LUC7L3	Luc7-like protein 3	O95232	O95232			0.17138	-0.373258	0.201878	-0.741515	-1.51552	-1.47308	-0.706142	-0.636815	-0.477376	0.0632636	-0.674426	-0.309881	-0.755275	-0.400773	-0.124231	5	5	5	13.7	13.7	13.7	51.466	0	46.478	468800000	50
TFRC	Transferrin receptor protein 1;Transferrin receptor protein 1, serum form	P02786	P02786			0.171696	-0.0367565	-0.134939	1.2397	1.08107	1.65736	1.31332	1.22621	1.41886	1.26681	1.3485	0.956755	1.44718	1.51757	1.56603	10	10	10	15.1	15.1	15.1	84.87	0	74.778	593860000	64
G6PD	Glucose-6-phosphate 1-dehydrogenase	P11413;P11413-2;P11413-3	P11413;P11413-2;P11413-3			0.17296	0.00474676	-0.177706	-0.0914923	0.927472	0.611715	0.364597	0.223216	0.352943	0.553022	0.343402	0.447385	0.553081	0.117761	0.54943	10	10	10	20.8	20.8	20.8	59.256	0	62.182	603830000	41
MARCKS	Myristoylated alanine-rich C-kinase substrate	P29966	P29966			0.176977	-0.349448	0.172471	-0.858084	-0.633727	NaN	0.132352	0.12877	1.08226	0.349225	0.457061	-0.306405	-0.129536	NaN	-1.4987	4	4	4	25.3	25.3	25.3	31.554	0	35.196	265830000	29
SMC4	Structural maintenance of chromosomes protein 4	Q9NTJ3;Q9NTJ3-2	Q9NTJ3;Q9NTJ3-2			0.177259	-0.124846	-0.0524139	-0.187359	0.101097	NaN	0.106739	0.152382	0.227177	0.00484657	-0.248379	0.0474949	-0.477707	0.35747	-0.554775	8	8	8	6.4	6.4	6.4	147.18	0	50.017	357670000	42
AIFM1	Apoptosis-inducing factor 1, mitochondrial	O95831-3;O95831;O95831-2;O95831-6;O95831-4;O95831-5	O95831-3;O95831;O95831-2			0.178347	-0.308138	0.129791	-0.466381	0.501713	-0.716171	0.0869427	0.376097	0.599203	0.100952	0.31176	0.170855	0.106709	-1.00158	-0.110968	7	7	7	15.3	15.3	15.3	66.294	0	59.802	425980000	70
ANXA2;ANXA2P2	Annexin A2;Putative annexin A2-like protein	P07355;P07355-2;A6NMY6	P07355;P07355-2;A6NMY6			0.179564	-0.0103067	-0.169257	-0.648568	-0.183362	-0.593372	-0.139118	0.0243804	-0.558338	-0.0278467	0.308678	0.936602	0.0788027	-0.423604	0.165143	13	13	13	45.1	45.1	45.1	38.604	0	185.57	3107100000	181
GNB2L1	Guanine nucleotide-binding protein subunit beta-2-like 1;Guanine nucleotide-binding protein subunit beta-2-like 1, N-terminally processed	P63244	P63244			0.180126	0.0542768	-0.234402	0.742776	0.886241	0.95112	0.476173	0.215202	0.14503	0.1189	-0.0746905	0.379014	0.189769	0.254217	0.469125	12	12	12	51.7	51.7	51.7	35.076	0	180.02	6184700000	167
FKBP4	Peptidyl-prolyl cis-trans isomerase FKBP4;Peptidyl-prolyl cis-trans isomerase FKBP4, N-terminally processed	Q02790	Q02790			0.183524	-0.116685	-0.0668399	0.321592	0.907996	0.258746	-0.0307624	0.127309	0.328948	0.228238	0.25267	0.13334	0.199584	0.0661462	0.282485	14	14	14	37	37	37	51.804	0	110.46	2037300000	118
PRDX2	Peroxiredoxin-2	P32119;P32119-2	P32119			0.183886	0.121247	-0.305133	0.0877787	-0.160661	-0.619306	-0.264976	0.246987	0.190278	0.162224	0.302922	0.323727	0.286719	-0.024545	0.134801	8	7	7	36.4	30.8	30.8	21.892	0	49.88	3146500000	121
HSPA4	Heat shock 70 kDa protein 4	P34932;P34932-2	P34932			0.185003	0.037269	-0.222272	0.250671	0.0979436	0.386266	-0.0888964	0.241388	0.0883211	0.227937	0.316058	0.965558	0.604636	-0.195498	0.282037	32	32	31	47.5	47.5	45.6	94.33	0	323.31	8126800000	354
RPSA	40S ribosomal protein SA	P08865	P08865			0.186434	-0.0319138	-0.15452	0.747612	1.01357	1.11111	-0.168314	-0.149002	-0.212675	0.0325718	-0.403536	0.178858	NaN	0.368465	0.0287819	6	6	6	20	20	20	32.854	0	92.639	1662500000	78
DNAJA2	DnaJ homolog subfamily A member 2	O60884	O60884			0.188641	-0.188641	NaN	-0.129971	NaN	-0.195242	0.528605	0.718233	0.797049	-0.311995	-0.00415993	NaN	-0.383905	NaN	0.0570107	4	4	4	9.7	9.7	9.7	45.745	0	24.848	156500000	14
ANXA6	Annexin A6	P08133-2;P08133	P08133-2;P08133			0.190254	-0.062706	-0.127548	0.219559	0.390305	-0.273434	0.108784	0.140461	-0.111111	-0.19442	0.14629	0.897633	0.335125	-0.215187	0.31987	16	16	16	27.9	27.9	27.9	72.423	0	107.62	254920000000	103
CAPN2	Calpain-2 catalytic subunit	P17655;P17655-2	P17655;P17655-2			0.190511	-0.154309	-0.0362021	0.655835	0.0168641	-0.314156	0.605188	0.754567	0.413358	0.144952	0.339509	0.0593255	NaN	0.39652	0.142965	7	7	7	10.6	10.6	10.6	79.994	0	53.124	448640000	28
PSMD1	26S proteasome non-ATPase regulatory subunit 1	Q99460-2;Q99460	Q99460-2;Q99460			0.191046	-0.0390256	-0.152021	0.475384	0.950509	0.991788	0.208255	0.248547	0.250205	0.217158	0.0717379	0.0987383	0.405242	0.754553	0.552687	16	16	16	19.3	19.3	19.3	102.26	0	129.45	2466400000	134
PSMD6	26S proteasome non-ATPase regulatory subunit 6	Q15008;Q15008-4;Q15008-3;Q15008-2	Q15008;Q15008-4;Q15008-3;Q15008-2			0.191134	-0.00370153	-0.187433	-0.390937	0.045674	0.315779	-0.206312	-0.319291	-0.342655	-0.0967878	-0.109996	-0.20313	-0.331649	-0.203924	0.165421	13	13	13	34.7	34.7	34.7	45.531	0	100.78	1126500000	109
RBM4;RBM4B	RNA-binding protein 4;RNA-binding protein 4B	Q9BWF3;Q9BWF3-4;Q9BQ04;Q9BWF3-3;Q9BWF3-2;Q96PK6-5	Q9BWF3;Q9BWF3-4;Q9BQ04;Q9BWF3-3;Q9BWF3-2			0.193096	-0.196858	0.00376256	0.168321	NaN	-0.00161616	0.668817	0.926017	1.13825	0.341493	NaN	0.0670083	NaN	NaN	0.0882371	4	4	4	11.8	11.8	11.8	40.313	0	24.649	189730000	19
HSD17B10	3-hydroxyacyl-CoA dehydrogenase type-2	Q99714;Q99714-2	Q99714;Q99714-2			0.19326	-0.0959682	-0.0972919	0.275608	0.408901	1.20485	0.126755	0.171453	0.0796013	0.165398	0.414309	0.557901	0.458929	0.0341835	0.318966	5	5	5	31.4	31.4	31.4	26.923	0	44.447	699210000	50
STAT3	Signal transducer and activator of transcription 3	P40763-3;P40763-2;P40763	P40763-3;P40763-2;P40763			0.197532	0.184703	-0.382235	-0.179709	NaN	NaN	1.02448	0.400592	0.233331	0.251502	0.0451368	0.23969	-0.117556	-0.510514	0.219714	3	3	3	6.6	6.6	6.6	83.125	0	18.289	158370000	7
PGRMC1	Membrane-associated progesterone receptor component 1	O00264;O00264-2	O00264;O00264-2			0.197806	-0.252221	0.0544154	0.0249907	-0.347602	NaN	-0.216731	-0.165828	-0.285642	0.123942	0.346827	0.182007	0.185662	0.313168	0.433274	4	4	4	20	20	20	21.671	0	24.879	536420000	43
APEX1	DNA-(apurinic or apyrimidinic site) lyase;DNA-(apurinic or apyrimidinic site) lyase, mitochondrial	P27695	P27695			0.199257	-0.185316	-0.0139408	0.278824	NaN	-0.0327015	0.246979	0.074543	0.296846	-0.118889	0.122164	0.069437	-0.0850239	0.150774	-0.427317	4	4	4	17	17	17	35.554	0	25.827	371260000	26
EIF3H	Eukaryotic translation initiation factor 3 subunit H	O15372	O15372	+		0.199495	0.332994	-0.53249	0.458662	0.406778	0.386066	0.849115	1.28194	0.657135	-0.212057	-0.123812	-0.0140533	0.336681	-0.318876	0.564589	8	8	8	22.4	22.4	22.4	39.93	0	66.185	374370000	47
MYL12A;MYL12B;MYL9	Myosin regulatory light chain 12A;Myosin regulatory light chain 12B;Myosin regulatory light polypeptide 9	P19105;O14950;P24844;P24844-2	P19105;O14950;P24844			0.200109	0.155615	-0.355724	0.0935879	-0.263498	-0.475679	-0.14444	-0.488277	-0.561975	-0.0680428	-0.425751	0.200268	-0.0334415	-0.652946	0.308302	7	7	7	50.9	50.9	50.9	19.794	0	109.05	1556300000	79
PGAM5	Serine/threonine-protein phosphatase PGAM5, mitochondrial	Q96HS1-2;Q96HS1	Q96HS1-2;Q96HS1			0.202931	-0.232436	0.0295054	-0.299873	-0.326953	NaN	0.213925	-0.309593	-0.1447	-0.0829137	-0.236949	NaN	-0.294568	-0.126544	-0.124122	4	4	4	16.1	16.1	16.1	28.02	0	27.9	271620000	10
RPL36A	60S ribosomal protein L36a	P83881	P83881			0.204472	0.156466	-0.360938	-0.686738	-1.26468	-1.78318	-0.386249	-0.162208	-0.194805	-0.721998	0.0162894	0.212861	-0.293372	-0.816211	-0.283618	5	5	2	24.5	24.5	9.4	12.441	0	30.134	1745600000	51
YWHAH	14-3-3 protein eta	Q04917	Q04917			0.205156	-0.0554778	-0.149678	-0.594794	-1.26704	-0.990477	-0.0828921	-0.156644	-0.0904566	0.0898164	0.17168	-0.280585	-0.458598	-0.118972	-0.295991	9	7	7	36.2	28.9	28.9	28.218	0	76.522	789060000	68
CDC37	Hsp90 co-chaperone Cdc37;Hsp90 co-chaperone Cdc37, N-terminally processed	Q16543	Q16543			0.205219	-0.141689	-0.06353	0.483473	0.826784	0.798292	-0.0475979	0.109823	0.475128	0.243355	0.298782	0.534735	-0.169558	0.527491	-0.00785446	6	6	6	22.5	22.5	22.5	44.468	0	48.922	1199300000	54
GCN1L1	Translational activator GCN1	Q92616	Q92616			0.208144	-0.00547345	-0.20267	0.276158	-0.62343	-0.515685	0.126441	-0.291746	0.0114028	0.0600135	0.127516	0.646987	-0.0504773	-0.0683378	0.247723	24	24	24	10.4	10.4	10.4	292.75	0	151.09	1675500000	55
APRT	Adenine phosphoribosyltransferase	P07741-2;P07741	P07741-2;P07741			0.208637	-0.154303	-0.0543346	0.680836	1.08436	0.882578	0.273323	0.186157	-0.178234	0.477081	0.0811062	0.555847	0.400763	0.408035	0.109978	5	5	5	41	41	41	14.557	0	52.28	980190000	47
YARS	Tyrosine--tRNA ligase, cytoplasmic;Tyrosine--tRNA ligase, cytoplasmic, N-terminally processed	P54577	P54577			0.2091	-0.036267	-0.172833	0.127076	0.0268911	0.121929	-0.0136458	0.390144	0.126285	0.0849603	-0.0296408	0.157134	-0.200017	-0.185542	0.240318	10	10	10	20.5	20.5	20.5	59.143	0	68.548	609060000	58
FSCN1	Fascin	Q16658	Q16658			0.209381	-0.0257072	-0.183674	0.0303993	0.374134	0.625294	0.515072	0.451111	0.6439	0.201319	0.433947	0.400202	0.237438	-0.0225697	0.202379	12	12	12	25.4	25.4	25.4	54.529	0	132.5	2510300000	133
NAP1L1	Nucleosome assembly protein 1-like 1	P55209-2;P55209;P55209-3	P55209-2;P55209;P55209-3			0.209426	0.0771192	-0.286545	0.105237	0.644517	0.632982	0.0661233	0.41418	0.312217	-0.0571391	0.311286	-0.0300032	-0.113196	0.494346	0.120977	4	4	3	10.9	10.9	8.2	42.761	0	63.258	1482100000	39
UBA1	Ubiquitin-like modifier-activating enzyme 1	P22314-2;P22314	P22314-2;P22314			0.209658	0.0880966	-0.297754	0.521471	0.617348	0.321991	0.0893574	-0.0658951	-0.0410042	0.00888634	0.0490074	0.428862	0.407463	0.135183	0.319756	34	34	34	42.3	42.3	42.3	113.8	0	323.31	16281000000	509
PKM	Pyruvate kinase PKM	P14618;P14618-3;P14618-2;P30613-2;P30613	P14618;P14618-3;P14618-2			0.209688	0.0164719	-0.22616	0.815056	0.89061	1.23245	0.153179	0.351549	0.238691	0.0480042	0.237768	0.498049	0.258503	0.247772	0.418028	28	28	28	57.3	57.3	57.3	57.936	0	323.31	38076000000	589
MSH2	DNA mismatch repair protein Msh2	P43246;P43246-2	P43246;P43246-2			0.210877	-0.149675	-0.0612024	0.57998	0.50013	0.293122	0.187094	0.0399329	0.130866	-0.052297	-0.116952	0.0888812	-0.274536	0.317885	0.614875	15	15	15	17.6	17.6	17.6	104.74	0	99.704	1157000000	55
MCM4	DNA replication licensing factor MCM4	P33991	P33991			0.215473	-0.368036	0.152563	-0.248222	0.0898857	0.0524654	-0.0585289	0.0219879	0.0920753	-0.177961	-0.564123	NaN	-0.513206	NaN	0.0100613	9	9	9	11.7	11.7	11.7	96.557	0	54.071	492800000	19
CANX	Calnexin	P27824;P27824-2;P27824-3	P27824;P27824-2;P27824-3			0.216434	0.0574856	-0.27392	0.205719	0.117229	0.441832	0.212152	0.495893	0.418293	0.386272	0.568804	0.697592	0.347353	0.314356	0.403624	12	12	12	22.6	22.6	22.6	67.567	0	86.359	2057600000	124
DLD	Dihydrolipoyl dehydrogenase, mitochondrial	P09622;P09622-2;P09622-3	P09622;P09622-2;P09622-3			0.224635	-0.240037	0.0154025	-0.231971	0.033673	-1.14268	0.496859	0.732901	1.24688	0.151135	0.618136	-0.187558	0.259812	1.03296	0.0612437	9	9	9	20.6	20.6	20.6	54.177	0	71.61	705190000	84
PSMC3	26S protease regulatory subunit 6A	P17980	P17980			0.226152	-0.0793076	-0.146845	0.810854	0.769737	0.807213	-0.34705	0.320942	0.16721	-0.0340786	0.290554	0.653414	0.356552	-0.0892639	0.667257	7	7	7	22.8	22.8	22.8	49.203	0	44.743	573950000	35
POR	NADPH--cytochrome P450 reductase	P16435	P16435			0.227246	-0.227246	NaN	0.00233936	-0.332681	-0.319989	0.110103	0.634196	0.231021	-0.138572	0.138957	0.0433245	0.204413	NaN	0.326819	4	4	4	5.2	5.2	5.2	76.689	0	24.617	135650000	25
TUBB4B	Tubulin beta-4B chain	P68371;Q3ZCM7	P68371			0.228742	-0.0655753	-0.163167	0.787322	1.08984	0.856914	0.102517	0.268825	0.376676	0.325765	0.120488	0.383437	0.385684	0.252973	0.701032	21	21	1	65.2	65.2	2.7	49.83	0	323.31	41496000000	654
RPL23	60S ribosomal protein L23	P62829	P62829			0.231759	0.0839513	-0.315711	1.17815	1.20358	0.557905	0.666799	0.113496	0.410219	-0.240809	0.203254	-0.266101	0.48483	0.763173	-0.0713526	3	3	3	22.9	22.9	22.9	14.865	0	19.758	1654300000	28
HSPH1	Heat shock protein 105 kDa	Q92598-2;Q92598;Q92598-4;Q92598-3	Q92598-2;Q92598;Q92598-4;Q92598-3			0.233199	0.0218728	-0.255072	-0.0339991	-0.29132	-0.462702	-0.163335	-0.0392501	0.0262693	-0.0498416	0.426744	0.526265	-0.0158049	-0.466622	0.0630811	18	18	17	24.8	24.8	23.1	92.115	0	138.19	2454500000	156
NASP	Nuclear autoantigenic sperm protein	P49321;P49321-3;P49321-4;P49321-2	P49321;P49321-3;P49321-4;P49321-2			0.234001	0.126245	-0.360245	-0.575185	-1.20827	-0.641898	-0.325135	-0.225365	-0.336404	-0.0137088	-0.0800177	-0.198584	0.185733	-0.199687	-0.318791	14	14	14	28.6	28.6	28.6	85.237	0	127.51	2364800000	146
SSB	Lupus La protein	P05455	P05455			0.237179	-0.221447	-0.0157318	-1.13267	-1.0857	-1.09281	-0.252735	-0.048439	0.176455	-0.120573	0.0123272	0.292608	-0.315994	-0.712898	-0.205008	7	7	7	19.6	19.6	19.6	46.836	0	62.101	701240000	86
FLOT1	Flotillin-1	O75955-2;O75955	O75955-2;O75955			0.248182	-0.0605323	-0.187649	-0.159629	0.0262121	-0.518571	0.323261	0.324279	0.232486	-0.368489	-0.389416	-0.204859	NaN	-0.28736	-0.23951	3	3	3	8.4	8.4	8.4	42.08	0	20.822	99512000	17
MYL6	Myosin light polypeptide 6	P60660-2;P60660;P14649	P60660-2;P60660			0.249086	-0.00833893	-0.240747	0.259588	-0.0619507	-0.014576	-0.00657463	-0.00219727	-0.0678253	-0.239996	0.108614	0.0940933	0.0414753	0.167032	-0.13345	5	5	5	31.1	31.1	31.1	16.961	0	81.787	1869300000	73
RSRC2	Arginine/serine-rich coiled-coil protein 2	Q7L4I2-2;Q7L4I2	Q7L4I2-2;Q7L4I2			0.252953	0.632073	-0.885026	NaN	NaN	-1.04933	-0.589797	1.15591	-0.0905088	0.309998	-0.511733	0.189698	-0.117803	NaN	-0.224941	5	5	5	12.7	12.7	12.7	44.878	0	41.762	241190000	26
ACTR3	Actin-related protein 3	P61158;Q9P1U1-2;Q9P1U1	P61158			0.253316	0.00144513	-0.254761	0.669046	0.674533	0.859998	0.355543	0.574041	0.403682	0.0587114	0.182716	0.235288	0.364143	0.305856	0.321309	5	5	5	14.6	14.6	14.6	47.371	0	34.058	360270000	21
TARDBP	TAR DNA-binding protein 43	Q13148;Q13148-4	Q13148;Q13148-4			0.261306	-0.0258853	-0.235421	-0.248887	-0.243922	NaN	0.597469	0.801599	0.582929	0.295842	0.739246	0.351816	0.235086	NaN	0.00994619	5	5	5	12.6	12.6	12.6	44.739	0	33.532	232880000	35
RAB5C	Ras-related protein Rab-5C	P51148;P51148-2;P20339-2;P20339	P51148;P51148-2			0.261921	-0.0742359	-0.187685	-0.170807	0.642563	0.894516	-0.370153	-0.278749	-0.194208	0.0081501	0.159172	-0.227221	0.045084	0.351093	-0.168076	6	6	4	34.3	34.3	24.1	23.482	0	49.642	857420000	52
NMT1	Glycylpeptide N-tetradecanoyltransferase 1	P30419;P30419-2	P30419;P30419-2			0.265673	-0.0634511	-0.202222	-1.01448	NaN	NaN	0.321164	1.0579	0.68694	0.470132	0.316847	0.317712	-0.269018	-0.839664	-0.720029	5	5	5	13.5	13.5	13.5	56.806	0	49.64	226790000	29
PSMC1	26S protease regulatory subunit 4	P62191-2;P62191	P62191-2;P62191			0.265949	-0.112158	-0.15379	0.54107	NaN	-0.727666	0.47972	0.147344	0.0604661	0.265521	0.207162	-0.0957076	0.325097	0.703426	0.344558	5	5	5	14.7	14.7	14.7	41.167	0	45.622	542100000	34
XPO5	Exportin-5	Q9HAV4	Q9HAV4			0.266779	-0.165558	-0.101221	-0.475727	NaN	-0.673264	0.260393	0.510942	0.578596	0.145161	0.349819	0.558327	NaN	0.590527	0.00980186	8	8	8	5.6	5.6	5.6	136.31	0	43.765	354220000	20
ST13;ST13P5;ST13P4	Hsc70-interacting protein;Putative protein FAM10A5;Putative protein FAM10A4	P50502;Q8NFI4;Q8IZP2	P50502;Q8NFI4;Q8IZP2			0.269395	-0.0680116	-0.201383	-0.107152	-1.00944	0.0675303	-0.178146	0.063439	-0.493392	-0.165569	0.175744	0.646022	0.530926	0.424258	0.325316	7	7	7	19.5	19.5	19.5	41.331	0	54.425	2193200000	97
NUTF2	Nuclear transport factor 2	P61970	P61970			0.269815	0.0875753	-0.35739	-0.0543486	NaN	0.331222	-0.503007	-0.150159	-0.370654	-0.0102412	-0.0312773	NaN	0.3085	NaN	NaN	3	3	3	24.4	24.4	24.4	14.478	0	18.145	273500000	27
ILF2	Interleukin enhancer-binding factor 2	Q12905	Q12905			0.270716	-0.672099	0.401383	0.948741	0.550503	0.422333	0.535716	0.238463	0.157891	0.474862	0.251418	0.228093	0.142573	1.00584	0.519904	7	7	7	23.8	23.8	23.8	43.062	0	53.122	831900000	42
AHSA1	Activator of 90 kDa heat shock protein ATPase homolog 1	O95433-2;O95433	O95433-2;O95433			0.272607	-0.230649	-0.0419585	0.186702	-0.380606	-0.0294768	-0.489113	0.657283	0.421235	0.0929521	0.46269	0.0201486	0.347638	0.299445	0.469852	6	6	6	27.8	27.8	27.8	32.339	0	52.128	436340000	37
HDLBP	Vigilin	Q00341;Q00341-2	Q00341;Q00341-2			0.274649	-0.00994301	-0.264706	-0.323259	-0.0294437	-0.0675488	0.330627	0.126518	0.104586	-0.580074	-0.159727	0.203165	-0.340794	-0.20454	-0.286459	14	14	14	13.3	13.3	13.3	141.45	0	86.376	601970000	37
SARS	Serine--tRNA ligase, cytoplasmic	P49591	P49591			0.280074	-0.205662	-0.074412	0.543914	1.14861	0.473264	-0.0627448	0.0435403	-0.0383498	-0.107152	0.623214	0.261918	0.252452	0.180362	0.798921	4	4	4	12.3	12.3	12.3	58.777	0	27.35	333480000	29
RPL36	60S ribosomal protein L36	Q9Y3U8	Q9Y3U8			0.282338	0.0476748	-0.330013	-0.616281	-1.12939	-1.21707	-0.455509	-1.36821	-1.10862	-0.759776	-0.447889	-0.118446	-0.887319	-1.44683	-0.835742	7	7	7	40	40	40	12.254	0	95.576	17337000000	283
GDI1	Rab GDP dissociation inhibitor alpha	P31150	P31150			0.284534	-0.425297	0.140762	0.415085	-0.347603	-0.581533	0.49614	0.346548	0.462809	0.539547	0.105328	-0.149912	0.910784	0.957279	0.383711	9	5	5	27.7	19.7	19.7	50.582	0	64.478	585720000	47
EIF2S3;EIF2S3L	Eukaryotic translation initiation factor 2 subunit 3;Putative eukaryotic translation initiation factor 2 subunit 3-like protein	P41091;Q2VIR3;Q2VIR3-2	P41091;Q2VIR3;Q2VIR3-2			0.284878	-0.166407	-0.118471	0.264843	0.579439	0.120968	0.168417	0.143057	-0.107191	-0.25943	-0.19383	-0.149805	0.594973	-0.215096	0.564257	8	8	8	21.8	21.8	21.8	51.109	0	75.283	1316100000	95
MRPS27	28S ribosomal protein S27, mitochondrial	Q92552;Q92552-2	Q92552;Q92552-2			0.285064	-0.176768	-0.108296	-0.129395	0.471137	0.245668	-0.603146	0.0500043	-0.252967	-0.236508	0.185279	-0.256953	0.340722	-0.160811	0.487863	4	4	4	11.1	11.1	11.1	47.611	0	24.312	190760000	14
EIF3F	Eukaryotic translation initiation factor 3 subunit F	O00303	O00303	+		0.292493	-0.0565599	-0.235933	0.715445	0.829402	1.09668	1.07814	0.865433	1.52732	0.775986	0.682572	0.0477587	0.828404	0.969649	1.0325	8	8	8	28.3	28.3	28.3	37.563	0	65.003	622090000	40
HNRNPA3	Heterogeneous nuclear ribonucleoprotein A3	P51991-2;P51991	P51991-2;P51991			0.293458	0.0640132	-0.357471	NaN	0.0194232	0.283475	-0.320392	0.597146	-0.455972	0.00314585	0.0804698	0.0905253	-0.375615	-0.308687	-0.287305	5	5	5	17.7	17.7	17.7	37.029	0	34.233	426630000	19
YWHAZ	14-3-3 protein zeta/delta	P63104;P63104-2	P63104;P63104-2			0.297725	-0.147689	-0.150036	-0.040837	-0.891314	-0.932519	-0.28654	-0.142241	-0.278327	-0.178668	0.0683874	0.297071	0.35951	-0.164977	0.0732873	11	8	8	48.6	37.6	37.6	27.745	0	227.71	9852800000	178
SF3B3	Splicing factor 3B subunit 3	Q15393;Q15393-2;Q15393-3	Q15393			0.298627	-0.224435	-0.0741914	0.469237	0.332074	0.0377967	-0.00681241	-0.156778	-0.315778	-0.0323633	-0.201812	0.132971	0.0382964	-0.302245	0.113169	14	14	14	14	14	14	135.58	0	109.39	1454000000	100
TMPO	Lamina-associated polypeptide 2, isoform alpha;Thymopoietin;Thymopentin;Lamina-associated polypeptide 2, isoforms beta/gamma;Thymopoietin;Thymopentin	P42166;P42167-3	P42166;P42167-3			0.305647	0.0678787	-0.373526	0.149467	NaN	-0.217491	0.113598	0.134518	-0.193975	0.628595	0.391031	0.650946	NaN	0.494429	0.0318012	7	7	3	12.2	12.2	4	75.491	0	46.313	362480000	22
IDH3A	Isocitrate dehydrogenase [NAD] subunit alpha, mitochondrial	P50213;P50213-2	P50213;P50213-2			0.30736	-0.0591749	-0.248185	0.260615	0.17553	-0.555976	0.474013	0.281098	0.388732	0.43283	0.272418	0.492724	NaN	-0.203756	0.211623	6	6	6	16.1	16.1	16.1	39.591	0	34.644	350960000	21
TXNL1	Thioredoxin-like protein 1	O43396	O43396			0.311724	-0.675683	0.363959	0.924855	-0.021663	NaN	0.441624	0.825024	0.452588	0.989157	0.496541	0.576592	0.449992	0.796891	0.593793	6	6	6	28	28	28	32.251	0	47.76	554510000	31
NCL	Nucleolin	P19338	P19338			0.313386	-0.0602258	-0.25316	-0.23491	-0.51806	-0.223564	-0.11247	-0.188299	-0.202709	0.100773	0.271226	-0.0904001	0.171103	-0.259712	0.190037	18	18	18	26.8	26.8	26.8	76.613	0	199.32	4580700000	237
MYL1;MYL3	Myosin light chain 1/3, skeletal muscle isoform;Myosin light chain 3	P05976-2;P05976;P08590	P05976-2;P05976;P08590			0.316903	0.110249	-0.427152	-0.216577	NaN	NaN	0.626057	NaN	0.192357	0.0991446	-0.0744451	0.532941	NaN	NaN	0.707808	2	2	2	10.7	10.7	10.7	16.684	0	14.507	231740000	21
VDAC3	Voltage-dependent anion-selective channel protein 3	Q9Y277;Q9Y277-2	Q9Y277;Q9Y277-2			0.317082	-0.0979684	-0.219114	1.80877	1.67882	2.30424	1.36904	1.31678	1.38553	1.85321	1.44854	1.59056	1.40202	1.43833	1.92326	8	8	8	36.4	36.4	36.4	30.658	0	89.982	2369400000	69
LCP1	Plastin-2	P13796;P13796-2	P13796			0.317159	NaN	-0.317159	0.161859	NaN	0.337722	0.552836	-0.149718	NaN	0.0919256	0.00542927	0.900334	0.0793486	-0.725997	-0.184836	8	5	5	14.5	9.6	9.6	70.288	0	35.217	277810000	28
PSMC6	26S protease regulatory subunit 10B	P62333	P62333			0.318738	-0.549014	0.230277	0.192614	NaN	-0.436843	-0.244544	-0.273788	0.40404	-0.175338	-0.0871538	-0.355977	-0.6921	-0.933404	-0.463157	6	6	6	18	18	18	44.172	0	43.276	373010000	57
RPL32	60S ribosomal protein L32	P62910	P62910			0.326239	-0.0806383	-0.245601	-0.611677	-1.29721	-1.17521	-0.569585	-1.41103	-0.865047	-0.814695	-0.765348	-1.09043	-1.22667	-1.40861	-1.25262	13	13	13	60.7	60.7	60.7	15.86	0	151.52	26941000000	343
SRM	Spermidine synthase	P19623	P19623			0.32862	-0.0927569	-0.235863	0.90991	1.18204	1.98877	0.392024	0.785442	0.695508	0.182277	0.237872	0.771995	1.02197	0.733703	1.10551	5	5	5	20.9	20.9	20.9	33.824	0	38.693	625860000	59
MCMBP	Mini-chromosome maintenance complex-binding protein	Q9BTE3-2;Q9BTE3;Q9BTE3-3	Q9BTE3-2;Q9BTE3			0.338991	-0.491186	0.152195	-0.653996	-0.466135	NaN	-0.258368	-0.237822	0.249973	-0.388874	-0.146378	-0.436451	-0.68314	NaN	-0.509039	3	3	3	6.4	6.4	6.4	72.748	0	22.46	150080000	28
CAD	CAD protein;Glutamine-dependent carbamoyl-phosphate synthase;Aspartate carbamoyltransferase;Dihydroorotase	P27708	P27708			0.341471	-0.099769	-0.241702	0.159474	-0.318197	NaN	-0.815257	-0.327161	-0.527213	-0.889087	-0.300001	-0.448186	-0.501972	-0.510658	NaN	5	5	5	2.6	2.6	2.6	242.98	0	47.015	113010000	15
HLA-B;HLA-C	HLA class I histocompatibility antigen, B-73 alpha chain;HLA class I histocompatibility antigen, Cw-7 alpha chain;HLA class I histocompatibility antigen, Cw-17 alpha chain;HLA class I histocompatibility antigen, Cw-1 alpha chain	Q31612;P10321;Q95604;P30499;Q31610;P30486	Q31612;P10321;Q95604;P30499			0.343632	-0.0932045	-0.250427	1.49249	0.810806	0.874397	1.35126	1.23869	1.25001	1.92881	1.08058	0.982555	0.319685	1.25253	1.28394	4	4	0	16.5	16.5	0	40.435	0	69.06	732910000	44
BOLA2	BolA-like protein 2	Q9H3K6-2;Q9H3K6	Q9H3K6-2;Q9H3K6			0.348624	-0.372314	0.0236899	0.631488	0.964184	0.498053	0.477078	0.379849	0.367972	0.362416	0.481928	-0.0892003	0.0181834	0.502835	0.325419	4	4	4	70.7	70.7	70.7	6.8417	0	50.774	505210000	53
MAPK1	Mitogen-activated protein kinase 1	P28482;P28482-2;P27361-2;P27361-3;P27361	P28482;P28482-2			0.364817	-0.233515	-0.131302	0.734617	NaN	0.0167961	-0.0750713	-0.770432	-0.514572	NaN	-0.552618	-0.759089	0.110304	0.327587	-0.764107	4	4	4	10.8	10.8	10.8	41.389	0	43.954	240550000	20
MPC2	Mitochondrial pyruvate carrier 2	O95563	O95563			0.365808	NaN	-0.365808	NaN	0.913963	0.294754	-1.00057	-0.793274	-0.949602	-0.454182	-0.713717	-0.448029	NaN	-0.706356	0.182428	2	2	2	17.3	17.3	17.3	14.279	0	16.409	190880000	19
LBR	Lamin-B receptor	Q14739	Q14739			0.374814	-0.800244	0.42543	0.854627	0.428653	0.920797	0.377815	0.0556138	0.35745	0.826816	0.32977	0.366878	0.452577	1.14494	0.304706	7	7	7	12.4	12.4	12.4	70.702	0	45.301	622820000	56
TSN	Translin	Q15631	Q15631			0.389845	-0.0219536	-0.367891	-0.189892	-0.745523	-0.0948277	-0.418932	-0.351894	-0.661718	-0.194267	0.146564	-0.610313	-0.756069	-2.84204	0.203133	2	2	2	12.3	12.3	12.3	26.183	0	18.163	449930000	37
ISYNA1	Inositol-3-phosphate synthase 1	Q9NPH2-2;Q9NPH2-3;Q9NPH2	Q9NPH2-2;Q9NPH2-3;Q9NPH2			0.403989	-0.0326392	-0.37135	-0.0150611	0.204851	-0.682257	0.0660222	-0.221776	-0.500983	0.0538858	-0.244776	0.477208	0.250224	-0.295949	0.433778	7	7	7	17.4	17.4	17.4	47.146	0	60.489	934220000	75
ANXA5	Annexin A5	P08758	P08758			0.41047	0.00269826	-0.413169	-0.314219	-0.819386	-0.548802	-0.647422	-0.417189	-0.641299	0.000430425	0.172168	0.962932	0.332942	-0.866847	0.378759	17	17	17	66.2	66.2	66.2	35.936	0	323.31	11222000000	203
VAT1	Synaptic vesicle membrane protein VAT-1 homolog	Q99536;Q99536-3;Q99536-2	Q99536;Q99536-3			0.417292	-0.120081	-0.297211	-0.014452	NaN	0.293716	-0.431606	-0.390646	-0.206177	0.0304298	-0.438353	0.127651	-0.205124	-0.633087	0.266806	5	5	5	20.1	20.1	20.1	41.92	0	49.256	638640000	18
ANXA1	Annexin A1	P04083	P04083			0.447022	0.190123	-0.637145	-0.393943	-0.83378	-1.00532	-0.216462	-0.797538	-0.338287	-0.0248044	-0.434448	-0.919278	-0.527845	-0.232837	-0.328712	14	14	14	47.7	47.7	47.7	38.714	0	294.39	7184700000	211
ALDH2	Aldehyde dehydrogenase, mitochondrial	P05091;P05091-2;P00352	P05091;P05091-2		x	0.450424	0.472286	-0.92271	7.38693	7.89636	7.37669	6.08574	6.03565	5.86629	5.35617	4.82208	4.70831	5.04895	5.1472	5.17528	26	26	23	55.1	55.1	52	56.381	0	323.31	17506000000	347
CLTA	Clathrin light chain A	P09496-2;P09496-4;P09496-3;P09496;P09496-5	P09496-2;P09496-4;P09496-3;P09496			0.453433	-0.0697943	-0.383639	0.52671	NaN	NaN	0.103547	0.115466	0.235362	0.572423	0.260972	0.631204	0.0598729	0.0955747	0.647594	5	5	5	25.2	25.2	25.2	23.662	0	34.488	938560000	36
RPL28	60S ribosomal protein L28	P46779;P46779-2;P46779-3;P46779-4;P46779-5	P46779;P46779-2;P46779-3;P46779-4;P46779-5			0.454995	-0.247267	-0.207728	-0.922623	-0.914796	-1.53926	-0.590905	-1.10803	-0.417525	-0.944094	-0.455323	-0.642188	-1.12982	-1.10009	-1.1803	12	12	12	55.5	55.5	55.5	15.747	0	114.13	17734000000	200
RPL34	60S ribosomal protein L34	P49207	P49207			0.457609	0.108157	-0.565766	-0.31536	-1.5062	-1.16576	0.0658773	-0.377158	-0.100815	-0.496947	-0.176392	0.362588	-0.207987	-0.165759	-0.418105	7	7	7	37.6	37.6	37.6	13.293	0	51.816	8120800000	102
PITPNB	Phosphatidylinositol transfer protein beta isoform	P48739;P48739-2;P48739-3	P48739;P48739-2;P48739-3			0.460197	-0.285121	-0.175076	0.315353	NaN	-0.873522	-0.460642	0.359353	0.262857	0.256374	-0.17022	-0.249436	-0.371678	0.17888	-0.242375	4	4	4	16.6	16.6	16.6	31.54	0	26.685	234540000	21
EEF1D	Elongation factor 1-delta	P29692;P29692-2;P29692-3;P29692-4	P29692;P29692-2;P29692-3;P29692-4			0.468367	-0.197931	-0.270437	0.125529	-0.386934	-0.325216	-0.264541	-0.0641359	-0.254499	0.0270507	-0.000285467	0.149239	0.213757	0.00583712	-0.0990957	9	9	9	41.3	41.3	41.3	31.121	0	113.18	1404600000	94
CNN3	Calponin-3	Q15417;Q15417-3;Q15417-2;Q99439-2;Q99439	Q15417;Q15417-3;Q15417-2			0.469158	-0.355361	-0.113797	-1.031	-0.831244	-0.902966	0.195396	0.374238	0.332528	-0.0180709	0.324998	-0.343762	-0.495717	0.384361	-0.24914	4	4	4	16.1	16.1	16.1	36.413	0	28.073	388310000	26
ADSL	Adenylosuccinate lyase	P30566;P30566-2	P30566;P30566-2			0.473892	-0.43128	-0.0426121	-0.137268	-0.355764	0.241264	0.234362	0.621878	0.575985	0.483463	0.677351	0.236092	0.57044	0.537958	0.441549	5	5	5	11.4	11.4	11.4	54.889	0	39.566	464270000	64
PRPF4B	Serine/threonine-protein kinase PRP4 homolog	Q13523	Q13523			0.477825	-0.0870482	-0.390776	-0.0620238	NaN	NaN	-0.561068	-0.775101	-0.744866	-0.00414721	-0.108164	2.78548	0.0272287	-0.463813	0.0885824	6	6	6	5.2	5.2	5.2	116.99	0	46.406	176370000	13
PSMD12	26S proteasome non-ATPase regulatory subunit 12	O00232;O00232-2	O00232;O00232-2			0.50997	0.0909564	-0.600927	1.0156	0.441273	NaN	0.285144	0.420985	-0.0799516	0.212516	0.0766493	0.220273	0.271065	-0.123988	0.117198	8	8	8	17.5	17.5	17.5	52.904	0	56.525	443730000	34
HSPA6;HSPA7	Heat shock 70 kDa protein 6;Putative heat shock 70 kDa protein 7	P17066;P48741	P17066;P48741			0.548322	-0.265198	-0.283124	-0.627097	NaN	NaN	0.453403	0.47647	0.422489	0.275062	0.364766	-0.0872027	-0.104466	0.135106	0.0078996	9	1	1	15.1	1.7	1.7	71.027	0	14.047	5233000000	39
USP7	Ubiquitin carboxyl-terminal hydrolase 7	Q93009;Q93009-3	Q93009;Q93009-3	+		0.647227	NaN	-0.647227	2.07749	0.955604	1.97209	1.69782	2.00128	1.95798	1.87732	2.13521	2.02097	2.15291	1.80428	1.90836	15	15	15	15.2	15.2	15.2	128.3	0	112.68	907300000	75
GNPAT	Dihydroxyacetone phosphate acyltransferase	O15228-2;O15228	O15228-2;O15228			NaN	0	NaN	1.4518	NaN	0.757849	2.94089	2.79806	2.8863	3.27286	1.93948	1.4199	1.92264	2.47088	2.66404	3	3	3	4.8	4.8	4.8	69.906	0	18.967	179500000	24
LANCL1	LanC-like protein 1	O43813	O43813			NaN	-0.192627	0.192627	0.203899	NaN	-0.0734425	0.132805	-0.0266399	0.226372	0.198536	NaN	0.0994854	NaN	0.109081	-0.0260086	3	3	3	7	7	7	45.283	0	19.01	175880000	11
PRPSAP2	Phosphoribosyl pyrophosphate synthase-associated protein 2	O60256;O60256-3;O60256-4;O60256-2;Q14558;Q14558-2	O60256;O60256-3;O60256-4;O60256-2			NaN	0	NaN	1.26875	0.859144	0.610519	0.311781	0.350086	0.609907	0.650764	0.429663	0.474255	0.112293	NaN	0.549055	5	5	5	17.3	17.3	17.3	40.925	0	31.806	261760000	28
PRAF2	PRA1 family protein 2	O60831	O60831			NaN	NaN	0	3.10235	2.04902	3.4245	2.74018	2.62064	2.98647	3.37169	3.14055	2.21528	3.04002	2.62171	3.21959	3	3	3	20.2	20.2	20.2	19.258	0	42.934	2165500000	53
PGLS	6-phosphogluconolactonase	O95336	O95336			NaN	-0.153842	0.153842	NaN	0.273499	0.331994	0.505441	0.213103	0.429154	0.541768	-0.0756407	0.153512	NaN	NaN	1.11096	5	5	5	27.9	27.9	27.9	27.547	0	34.459	563470000	11
CNP	2,3-cyclic-nucleotide 3-phosphodiesterase	P09543-2;P09543	P09543-2;P09543			NaN	-0.269001	0.269001	0.181681	NaN	NaN	0.307631	0.153856	0.0275726	-0.0789967	0.00056839	0.102406	NaN	NaN	-0.451674	6	6	6	14	14	14	45.098	0	36.804	235590000	9
CD99	CD99 antigen	P14209-3;P14209	P14209-3;P14209			NaN	NaN	0	-1.63227	-1.09952	NaN	-0.15131	-0.0078373	0.462727	0.318148	-0.206711	-0.684303	-0.673399	-1.21245	-0.475426	2	2	2	14.2	14.2	14.2	17.128	0	17.876	140060000	23
ACP1	Low molecular weight phosphotyrosine protein phosphatase	P24666-4;P24666;P24666-3;P24666-2	P24666-4;P24666;P24666-3;P24666-2			NaN	-0.0963678	0.0963678	1.24965	NaN	NaN	0.449271	-0.108336	0.358636	0.412362	0.474231	NaN	0.384696	1.08461	0.490613	2	2	2	18.8	18.8	18.8	12.23	0	16.655	243580000	24
DDT;DDTL	D-dopachrome decarboxylase;D-dopachrome decarboxylase-like protein	P30046;P30046-2;A6NHG4	P30046;P30046-2;A6NHG4			NaN	NaN	0	0.24774	NaN	1.108	0.0709915	0.349936	0.286785	NaN	0.0200806	0.339619	0.261822	0.588896	0.265263	3	3	3	27.1	27.1	27.1	12.712	0	20.021	352370000	13
PPP1CC	Serine/threonine-protein phosphatase PP1-gamma catalytic subunit	P36873;P36873-2	P36873;P36873-2			NaN	-0.231345	0.231345	NaN	0.194812	0.665696	-0.181314	0.00942516	NaN	-0.0847197	-0.204955	NaN	0.344453	0.233573	-0.0623713	3	2	2	11.8	7.4	7.4	36.983	0	14.76	150530000	15
FDFT1	Squalene synthase	P37268-5;P37268;P37268-4;P37268-3;P37268-2	P37268-5;P37268;P37268-4;P37268-3;P37268-2			NaN	NaN	0	-0.279219	0.405699	0.624939	1.17382	0.762522	0.724371	1.01636	0.933802	-0.0989437	0.345116	0.140535	0.400869	5	5	5	15.8	15.8	15.8	43.06	0	32.774	203690000	20
STAT1	Signal transducer and activator of transcription 1-alpha/beta	P42224;P42224-2	P42224;P42224-2			NaN	0	NaN	0.0799141	1.29616	NaN	-0.0694389	0.502117	0.548964	0.325115	-0.239498	-0.0491791	0.38555	-0.245283	NaN	5	5	5	8.7	8.7	8.7	87.334	0	33.132	264390000	16
UQCRFS1;UQCRFS1P1	Cytochrome b-c1 complex subunit Rieske, mitochondrial;Cytochrome b-c1 complex subunit 11;Putative cytochrome b-c1 complex subunit Rieske-like protein 1	P47985;P0C7P4	P47985;P0C7P4			NaN	NaN	0	0.156206	0.0180931	NaN	0.379269	0.451288	0.829487	0.679655	0.458031	-0.212273	NaN	NaN	0.140846	4	4	4	14.6	14.6	14.6	29.668	0	23.956	165830000	25
GALK1	Galactokinase	P51570;P51570-2	P51570;P51570-2			NaN	NaN	0	0.295074	0.45244	0.536188	0.217121	0.37903	0.0967979	-0.0335255	-0.197231	0.270525	0.527817	0.0355549	0.428846	4	4	4	10.5	10.5	10.5	42.272	0	24.898	163290000	6
SLC25A1	Tricarboxylate transport protein, mitochondrial	P53007	P53007			NaN	NaN	0	NaN	0.0989208	0.442049	0.354881	0.462526	0.545834	0.311184	0.417	0.16547	0.163633	0.440645	NaN	3	3	3	10	10	10	34.012	0	26.184	224250000	11
RAD23B	UV excision repair protein RAD23 homolog B	P54727;P54725-2;P54725-3;P54725;P54727-2	P54727			NaN	0	NaN	-0.0152435	-0.883804	-0.0505104	NaN	0.216526	0.213362	-0.0271454	0.5446	0.372173	0.681046	NaN	0.0924587	5	5	5	15.9	15.9	15.9	43.171	0	34.411	302810000	21
PSMD4	26S proteasome non-ATPase regulatory subunit 4	P55036;P55036-2;A2A3N6	P55036;P55036-2			NaN	NaN	0	0.694586	NaN	0.454809	0.605225	0.23456	-0.0641251	-0.0407753	-0.108442	-0.0631409	0.598907	1.12263	0.101561	4	4	4	13.5	13.5	13.5	40.736	0	30.594	261730000	16
ARPC4	Actin-related protein 2/3 complex subunit 4	P59998;P59998-3;P59998-4;P59998-2	P59998;P59998-3;P59998-4;P59998-2			NaN	NaN	0	0.597418	NaN	0.654699	-0.279776	NaN	-0.35355	-0.0481167	-0.658367	NaN	-0.416319	-0.100481	0.012413	3	3	3	16.1	16.1	16.1	19.667	0	17.251	250620000	8
PPP1CA	Serine/threonine-protein phosphatase PP1-alpha catalytic subunit	P62136;P62136-2;P62136-3	P62136;P62136-2;P62136-3			NaN	NaN	0	0.197744	NaN	0.446909	NaN	-0.0069561	-0.0882034	-0.120274	-0.039341	0.213255	-0.0868435	-0.300539	NaN	3	2	2	10	5.8	5.8	37.512	0	18.052	211600000	28
RPS28	40S ribosomal protein S28	P62857	P62857			NaN	0.00447083	-0.00447083	NaN	0.0140266	0.359823	-0.40163	-0.212053	-0.155806	-0.221661	-0.101183	-0.0764904	0.128296	NaN	-0.141396	3	3	3	46.4	46.4	46.4	7.8409	0	19.228	453950000	23
REEP5	Receptor expression-enhancing protein 5	Q00765	Q00765			NaN	0	NaN	0.575962	0.341022	NaN	1.69001	1.68024	1.93662	1.75825	1.75151	1.17492	1.53591	NaN	1.68174	3	3	3	11.1	11.1	11.1	21.493	0	39.598	299040000	34
FMR1	Fragile X mental retardation protein 1	Q06787-8;Q06787-6;Q06787-2;Q06787-4;Q06787-5;Q06787-9;Q06787-7;Q06787-3;Q06787;Q06787-11;Q06787-10	Q06787-8;Q06787-6;Q06787-2;Q06787-4;Q06787-5;Q06787-9;Q06787-7;Q06787-3;Q06787;Q06787-11;Q06787-10			NaN	-0.232311	0.232311	0.111328	NaN	0.0111523	NaN	0.387447	0.202936	0.162529	NaN	0.15254	0.326557	0.267136	-0.167105	5	5	2	8.9	8.9	2.9	66.245	0	29.426	218200000	17
ECH1	Delta(3,5)-Delta(2,4)-dienoyl-CoA isomerase, mitochondrial	Q13011	Q13011			NaN	-0.0235481	0.0235481	0.0203762	0.0848522	-0.212452	0.208078	0.135935	0.322311	-0.366226	0.31221	0.208008	-0.201178	NaN	0.0461025	3	3	3	8.5	8.5	8.5	35.816	0	20.746	144760000	12
APOA1BP	NAD(P)H-hydrate epimerase	Q8NCW5-2;Q8NCW5	Q8NCW5-2;Q8NCW5			NaN	0.211904	-0.211904	0.591479	0.65235	1.47259	-0.361564	-0.582118	NaN	-0.471906	-0.0265226	-0.0249472	-0.259379	0.167346	0.759929	3	3	3	26.5	26.5	26.5	20.43	0	23.085	382390000	17
ABCF1	ATP-binding cassette sub-family F member 1	Q8NE71-2;Q8NE71	Q8NE71-2;Q8NE71			NaN	-0.661957	0.661957	0.395691	0.125542	-0.106255	-0.44813	-0.142017	-0.275402	0.954023	0.142115	0.232618	0.172672	NaN	0.162943	4	4	4	5.8	5.8	5.8	91.679	0	28.29	168280000	36
HM13	Minor histocompatibility antigen H13	Q8TCT9-5;Q8TCT9;Q8TCT9-4;Q8TCT9-2	Q8TCT9-5;Q8TCT9;Q8TCT9-4;Q8TCT9-2			NaN	NaN	0	0.397581	0.802553	0.685566	0.658844	0.773434	0.572546	0.529528	0.709745	0.261011	0.237476	0.239277	0.88932	3	3	3	13.7	13.7	13.7	36.813	0	34.767	712350000	48
NUP210	Nuclear pore membrane glycoprotein 210	Q8TEM1;Q8TEM1-2	Q8TEM1			NaN	0.466085	-0.466085	1.94045	0.838573	1.41434	1.44971	1.29934	0.618258	0.978556	0.344763	0.651785	0.925194	1.34555	1.19393	12	12	12	7.2	7.2	7.2	205.11	0	80.957	483780000	27
ISOC1	Isochorismatase domain-containing protein 1	Q96CN7	Q96CN7			NaN	NaN	0	7.94643	7.28716	7.62422	7.77569	7.5703	7.64013	7.19203	7.00087	6.85709	6.67628	6.75274	6.66621	12	12	12	51	51	51	32.236	0	177.87	7353000000	203
C19orf43	Uncharacterized protein C19orf43	Q9BQ61	Q9BQ61			NaN	0	NaN	-0.602301	0.171181	NaN	1.08692	1.41757	0.779627	0.547312	0.288881	0.15641	NaN	NaN	-0.524776	2	2	2	13.1	13.1	13.1	18.419	0	12.301	68121000	10
TBCD	Tubulin-specific chaperone D	Q9BTW9;Q9BTW9-4;Q9BTW9-5;Q9BTW9-3	Q9BTW9;Q9BTW9-4;Q9BTW9-5			NaN	0.146063	-0.146063	0.675276	0.0405369	1.24392	0.652246	0.208254	0.312035	0.730055	0.434402	0.862064	0.921415	0.335463	1.1228	7	7	7	7.5	7.5	7.5	132.6	0	46.005	357380000	24
TUBB6	Tubulin beta-6 chain	Q9BUF5	Q9BUF5			NaN	0.130396	-0.130396	0.89349	0.241199	0.994345	-0.78813	0.452564	-0.298079	-0.566563	-0.134874	NaN	0.474781	0.0262146	0.891289	13	4	4	35.9	15.5	15.5	49.857	0	28.181	269930000	20
ILKAP	Integrin-linked kinase-associated serine/threonine phosphatase 2C	Q9H0C8	Q9H0C8			NaN	NaN	0	-0.19618	0.0822773	NaN	0.575075	0.589798	0.973764	0.0517979	0.949015	0.443691	NaN	NaN	0.359436	3	3	3	6.9	6.9	6.9	42.906	0	18.554	86188000	10
CACYBP	Calcyclin-binding protein	Q9HB71-3;Q9HB71	Q9HB71-3;Q9HB71			NaN	0	NaN	0.972435	NaN	NaN	-0.334568	0.91095	0.00576401	-0.194807	0.135429	NaN	0.0496483	-0.0964832	0.408686	4	4	4	27.6	27.6	27.6	21.228	0	25.069	230440000	12
VPS29	Vacuolar protein sorting-associated protein 29	Q9UBQ0;Q9UBQ0-2	Q9UBQ0;Q9UBQ0-2			NaN	0.000606537	-0.000606537	0.501856	0.0281467	-0.295849	0.22735	0.23773	0.56992	0.255785	-0.00766373	-0.0722504	-0.0265522	0.107174	0.510551	4	4	4	22	22	22	20.505	0	24.031	152650000	14
CTSZ	Cathepsin Z	Q9UBR2	Q9UBR2			NaN	NaN	0	5.64573	4.4466	4.60587	5.70378	5.57351	5.75505	5.06276	4.76952	4.09647	4.21095	4.29535	4.22282	4	4	4	12.9	12.9	12.9	33.868	0	52.587	2562000000	59
SAR1B	GTP-binding protein SAR1b	Q9Y6B6	Q9Y6B6			NaN	0.00769615	-0.00769615	0.135313	NaN	NaN	-0.356924	0.126759	-0.257088	-0.310024	-0.238039	NaN	-0.0864506	NaN	-0.170668	2	2	1	11.1	11.1	5.6	22.41	0	17.105	411940000	22
