# Supplementary material for: Activity-based protein profiling reveals deubiquitinase and aldehyde dehydrogenase targets of a cyanopyrrolidine probe
Source: RSC Med Chem. 2021 Aug 16;12(11):1935–43. doi: 10.1039/d1md00218j (PMC8597422; doi:10.1039/d1md00218j)
Supplement: MD-012-D1MD00218J-s004 [file MD-012-D1MD00218J-s004.xlsx]

## Sheet:  Data S3. 
Supplementary Data S3. Whole proteome analysis
Whole proteome analysis of parent compound MT16-001
TMT quantitative proteome analysis of parent compound MT16-001 in varying concentration (2, 20, 200 or 2000 nM).

## Sheet: All protein IDs
Gene names	Protein names	Protein IDs (Uniprot accession)	Majority protein IDs (Uniprot accession)	DUBs	Log2 reporter intensity values																				N: Peptides	N: Razor + unique peptides	N: Unique peptides	N: Sequence coverage [%]	N: Unique + razor sequence coverage [%]	N: Unique sequence coverage [%]	N: Mol. weight [kDa]	N: Q-value	N: Score	N: Intensity	N: MS/MS count
					DMSO (1)	DMSO (2)	DMSO (3)	DMSO (4)	MT16-001 2 nM (1)	MT16-001 2 nM (2)	MT16-001 2 nM (3)	MT16-001 2 nM (4)	MT16-001 20 nM (1)	MT16-001 20 nM (2)	MT16-001 20 nM (3)	MT16-001 20 nM (4)	MT16-001 200 nM (1)	MT16-001 200 nM (2)	MT16-001 200 nM (3)	MT16-001 200 nM (4)	MT16-001 2000 nM (1)	MT16-001 2000 nM (2)	MT16-001 2000 nM (3)	MT16-001 2000 nM (4)
AAAS	Aladin	Q9NRG9;Q9NRG9-2	Q9NRG9;Q9NRG9-2		0.210669	-1.15053	-0.0206964	-0.222669	0.0793237	0.632552	0.13666	-0.13898	0.572631	0.0202335	0.224447	-0.217438	0.270775	-1.0312	-0.14925	0.168341	0.6555	-0.282663	0.0320975	0.153833	6	6	5	14.7	14.7	12.5	59.573	0	14.203	35719000	8
AACS	Acetoacetyl-CoA synthetase	Q86V21-3;Q86V21	Q86V21-3;Q86V21		0.243139	-0.150925	0.613665	0.553126	0.428078	-0.0588866	-0.321889	0.124581	0.617816	-0.511822	-0.0771406	-0.657424	-0.640074	-0.0204839	-1.4136	-0.726891	0.0612088	0.00923587	0.67522	1.19669	2	2	2	9.6	9.6	9.6	30.061	0	8.7015	25346000	5
AAGAB	Alpha- and gamma-adaptin-binding protein p34	Q6PD74	Q6PD74		0.339246	-2.38025	0.22877	0.205924	-0.051059	0.326146	-0.0837674	-0.871567	0.513675	-0.0919951	0.224016	-0.0472794	0.367658	0.44189	0.0391713	0.312838	0.309857	0.202118	-0.0554992	0.0137386	2	2	2	7.3	7.3	7.3	34.593	0	5.5077	37821000	9
AAMDC	Mth938 domain-containing protein	Q9H7C9;Q9H7C9-3;Q9H7C9-2	Q9H7C9;Q9H7C9-3;Q9H7C9-2		-0.182499	0.228201	-0.151942	-0.03794	-0.0300114	0.00560078	-0.0533772	0.463274	-0.13342	0.091036	-0.0546173	-0.0559946	0.0383882	0.0378065	-0.0428987	-0.00670176	-0.161283	0.083466	-0.0962302	0.0027737	3	3	3	27.9	27.9	27.9	13.332	0	20.9	138190000	6
AAMP	Angio-associated migratory cell protein	Q13685	Q13685		0.0468021	0.13592	-0.049303	0.108423	-0.00275335	-0.014926	-0.0294255	0.035055	-0.017488	-0.0370442	-0.00123709	0.0259882	-0.0586824	0.0325375	-0.0789054	0.0688275	-0.107701	0.000621371	-0.102253	-0.0108246	7	7	7	16.6	16.6	16.6	46.75	0	16.316	321350000	17
AAR2	Protein AAR2 homolog	Q9Y312	Q9Y312		0.22516	-0.630431	-0.0637062	-0.0121486	-0.0489997	0.188975	-0.0715159	0.177787	0.586551	-0.299963	-0.165542	0.107759	0.651987	-0.444942	-0.000832736	0.0726757	0.267628	-0.518681	-0.0393347	-0.0387967	6	6	5	20.1	20.1	17.2	43.472	0	9.7027	67367000	13
AARS	Alanine--tRNA ligase, cytoplasmic	P49588;P49588-2	P49588;P49588-2		0.0292875	0.0289811	0.00540686	0.0320221	0.011067	-0.0105699	-0.00185061	0.00415725	-0.00392413	-0.0507221	-0.0108021	0.00505829	-0.00237016	-0.00838584	-0.0109891	-0.0287377	-0.0214674	0.00538946	-0.0132485	-0.0146713	32	32	32	38.6	38.6	38.6	106.81	0	139.58	2345200000	149
AARS2	Alanine--tRNA ligase, mitochondrial	Q5JTZ9;Q9H2T7	Q5JTZ9		-0.0766625	0.0029251	-0.0282666	-0.0908934	-0.03224	0.00545401	-0.0988271	-0.0265245	-0.0423598	0.0302327	-0.0155001	-0.0913269	0.00677204	-0.00812238	0.186456	-0.0789861	0.0244457	0.0668407	0.150013	0.0602015	12	12	12	14.1	14.1	14.1	107.34	0	37.27	335470000	34
AARSD1	Alanyl-tRNA editing protein Aarsd1	Q9BTE6;Q9BTE6-2;Q9BTE6-3	Q9BTE6;Q9BTE6-2;Q9BTE6-3		0.0245254	-0.0449901	0.331218	0.250903	-0.00760546	0.068803	0.489372	-0.804607	0.00940776	-0.214555	0.175575	-0.541014	0.18637	-0.0802152	-0.0879017	-0.619692	0.0515378	-0.0159924	0.0454056	0.727087	3	3	3	9	9	9	45.479	0	13.644	64690000	6
AASDHPPT	L-aminoadipate-semialdehyde dehydrogenase-phosphopantetheinyl transferase	Q9NRN7;Q9NRN7-2	Q9NRN7;Q9NRN7-2		0.0564297	-0.0578504	-0.0602927	0.0609747	-0.0150221	0.119452	0.0282454	0.112404	-0.0138075	-0.0783199	-0.0160072	-0.0897665	0.0261186	-0.0509059	-0.0772504	0.0267423	-0.0675464	0.0587376	-0.0334903	0.0147858	10	10	10	38.2	38.2	38.2	35.776	0	25.595	478470000	31
AASS	Alpha-aminoadipic semialdehyde synthase, mitochondrial;Lysine ketoglutarate reductase;Saccharopine dehydrogenase	Q9UDR5	Q9UDR5		0.0380919	-0.158675	-0.071688	0.0081356	-0.0437864	0.0363032	0.0359342	0.00513786	0.0779955	-0.0984983	-0.146127	-0.0141886	-0.0354073	0.11627	0.18231	0.0704427	0.0611313	-0.0161388	-0.1274	0.0237887	6	6	6	6.7	6.7	6.7	102.13	0	9.8627	130580000	10
ABCB1	Multidrug resistance protein 1	P08183-2;P08183	P08183-2;P08183		-0.285732	0.0778067	-0.11537	-0.0346123	0.0316791	0.111028	0.168073	-0.0367622	-0.0277104	0.166794	-0.271099	0.24651	-0.231997	-0.0089168	0.219555	-0.104051	-0.0654133	0.209748	0.0812833	-0.187182	4	4	4	3.3	3.3	3.3	134.03	0	4.4469	60394000	4
ABCB7	ATP-binding cassette sub-family B member 7, mitochondrial	O75027-3;O75027;O75027-2	O75027-3;O75027;O75027-2		-0.056314	-0.188239	-0.0304868	-0.0626827	-0.00281248	0.19398	0.106215	0.0144129	0.00230074	-0.0659549	-0.0570955	0.0739143	0.013423	-0.126739	0.291242	0.00133619	0.161274	0.0463672	-0.149808	-0.220701	5	5	5	8.4	8.4	8.4	78.159	0	7.9115	58090000	6
ABCD3	ATP-binding cassette sub-family D member 3	P28288;P28288-2;P28288-3	P28288;P28288-2		-0.00104174	-0.21726	-0.0284354	-0.0536333	0.0913191	-0.000531148	0.0190385	-0.0118761	0.068565	0.0366835	-0.0121336	-0.0893805	-0.0357121	-0.107058	-0.0153667	0.0871564	0.0923016	0.0500199	0.0593717	0.0116041	14	14	14	24.1	24.1	24.1	75.475	0	32.386	483920000	34
ABCE1	ATP-binding cassette sub-family E member 1	P61221	P61221		0.0163634	0.0333318	0.0133669	0.0395644	0.00816212	-0.0105299	0.0354959	-0.00145155	-0.0474193	-0.0269051	-0.0465012	-0.0795749	0.0150878	-0.0748073	0.000810444	-0.0166922	0.0378817	0.0261204	0.0565821	-0.0352547	18	18	18	29.2	29.2	29.2	67.314	0	45.277	1053700000	72
ABCF1	ATP-binding cassette sub-family F member 1	Q8NE71-2;Q8NE71	Q8NE71-2;Q8NE71		0.024212	0.013171	0.0183406	-0.0150618	-0.00892401	0.0398241	-0.000518322	0.015094	0.0121719	-0.00209818	-0.0364197	-0.0323553	-0.0562376	-0.025349	-0.0510349	0.006779	0.00790575	-0.0273903	0.0146388	0.0468826	15	15	15	22.7	22.7	22.7	91.679	0	79.883	1096900000	78
ABCF2	ATP-binding cassette sub-family F member 2	Q9UG63;Q9UG63-2	Q9UG63;Q9UG63-2		-0.185899	-0.076042	0.0368667	-0.0896076	-0.0150643	-0.168747	-0.0347991	0.0525171	-0.183247	0.0273154	0.0516683	-0.113083	0.021059	0.357822	-0.079318	-0.0196273	0.0775129	0.122576	0.0927171	0.0690107	10	10	10	17.2	17.2	17.2	71.289	0	29.852	332200000	25
ABCF3	ATP-binding cassette sub-family F member 3	Q9NUQ8-2;Q9NUQ8	Q9NUQ8-2;Q9NUQ8		-0.100242	0.0626809	0.149383	-0.0151691	-0.281279	-0.0971799	-0.00869092	-0.0390981	0.0782614	0.108287	-0.0462927	-0.0467802	-0.0469232	0.165391	-0.0728402	-0.017382	0.0019404	0.0863495	-0.130207	0.193422	4	4	4	5.7	5.7	5.7	78.983	0	5.6989	29778000	6
ABHD12	Monoacylglycerol lipase ABHD12	Q8N2K0;Q8N2K0-2;Q8N2K0-3	Q8N2K0;Q8N2K0-2;Q8N2K0-3		0.0732316	0.12327	-0.14877	0.118036	-0.125332	-0.0718667	0.0754671	-0.0104459	-0.045293	-0.149579	-0.117465	-0.0289474	-0.0548578	0.181061	0.278157	0.0269173	-0.0164828	0.0631341	-0.072806	-0.153798	4	4	4	13.1	13.1	13.1	45.096	0	6.507	74182000	7
ABI1;ABI2	Abl interactor 1;Abl interactor 2	Q8IZP0-10;Q8IZP0-8;Q8IZP0-7;Q8IZP0-2;Q8IZP0-4;Q8IZP0-3;Q8IZP0-5;Q8IZP0-6;Q8IZP0-9;Q8IZP0-12;Q8IZP0;Q8IZP0-11;Q9NYB9-3	Q8IZP0-10;Q8IZP0-8;Q8IZP0-7;Q8IZP0-2;Q8IZP0-4;Q8IZP0-3;Q8IZP0-5;Q8IZP0-6;Q8IZP0-9;Q8IZP0-12;Q8IZP0;Q8IZP0-11;Q9NYB9-3		-0.0382082	0.137332	0.0850271	0.0413852	-0.159198	0.126152	-0.0647398	0.144232	-0.164952	0.0392633	-0.0901583	0.0023326	0.0297921	0.0779298	0.0525551	-0.157654	0.0299658	-0.100793	0.0817268	-0.128362	4	4	2	9.8	9.8	5.2	42.667	0	8.5612	80673000	8
ABLIM1	Actin-binding LIM protein 1	O14639-4;O14639-3;O14639-5;O14639-2;O14639;O14639-6	O14639-4;O14639-3;O14639-5;O14639-2;O14639;O14639-6		-0.0684629	0.0957127	-0.0283592	-0.300487	0.097843	0.0274228	-0.064184	0.0906915	-0.194551	-0.0743111	-0.175727	0.281809	-0.0760127	0.511516	0.272082	-0.017725	-0.111841	-0.23003	0.0247284	-0.116483	4	4	4	9.7	9.7	9.7	46.086	0	6.8811	56065000	6
ABR	Active breakpoint cluster region-related protein	Q12979-4;Q12979-2;Q12979;Q12979-3	Q12979-4;Q12979-2;Q12979		0.0227008	0.0773937	0.0184523	-0.0464719	-0.0102788	0.0660162	-0.0216078	0.119562	-0.0600753	-0.0939223	-0.0500972	-0.247136	-0.0628262	0.0708562	0.165518	-0.0778595	0.0132867	-0.0458655	0.0956259	0.0103589	3	3	3	3.6	3.6	3.6	92.424	0	6.2969	59929000	6
ACAA1	3-ketoacyl-CoA thiolase, peroxisomal	P09110	P09110		0.143669	0.172764	0.0288609	0.000395685	-0.0103956	0.0159592	0.0696867	-0.056191	-0.137659	-0.0069582	-0.105988	0.152772	0.0343976	-0.328476	-0.242042	0.0667149	0.0395285	0.0544568	0.0396597	0.0124763	2	2	2	7.5	7.5	7.5	44.292	0	15.811	64026000	6
ACAA2	3-ketoacyl-CoA thiolase, mitochondrial	P42765	P42765		0.0937961	-0.0809765	0.0439413	-0.0104056	0.00292844	-0.00646329	-0.0260718	-0.0559516	0.0401471	-0.0484141	0.0352798	-0.07923	-0.00294037	-0.0527489	-0.071817	0.0600258	0.00946042	0.0224966	0.0174391	0.0531353	15	15	15	49.6	49.6	49.6	41.924	0	65.653	1085400000	73
ACACA	Acetyl-CoA carboxylase 1;Biotin carboxylase	Q13085-3;Q13085-2;Q13085;Q13085-4;O00763-3;O00763-2;O00763	Q13085-3;Q13085-2;Q13085;Q13085-4		-0.178556	0.249517	-0.0520067	-0.0857276	-0.0865671	-0.0056993	0.0477762	-0.0634645	-0.100287	-0.084832	-0.0246194	-0.00524187	-0.0460568	0.403193	0.0183273	0.019388	-0.150681	-0.0227447	0.0298075	0.0821061	22	22	22	11.2	11.2	11.2	257.24	0	45.053	352970000	40
ACAD9	Acyl-CoA dehydrogenase family member 9, mitochondrial	Q9H845	Q9H845		-0.0635535	-0.14416	-0.167021	-0.0395389	-0.0497087	0.105261	-0.0650812	0.123508	0.0126011	-0.062806	0.148078	-0.1484	-0.143596	0.140179	-0.0150518	-0.0402506	0.113024	0.0700458	0.0110395	0.159064	5	5	5	9	9	9	68.76	0	8.5498	87643000	8
ACADM	Medium-chain specific acyl-CoA dehydrogenase, mitochondrial	P11310;P11310-2	P11310;P11310-2		-0.0594424	-0.0607159	-0.0595826	0.104838	0.00374269	0.0222211	0.0998355	-0.0932419	0.0332729	0.0713138	0.0304545	-0.0665497	-0.0780748	-0.00447875	-0.0219777	-0.00363932	0.0853956	-0.0359486	-0.0528131	0.0290219	7	7	7	16.4	16.4	16.4	46.588	0	13.482	192150000	26
ACADSB	Short/branched chain specific acyl-CoA dehydrogenase, mitochondrial	P45954;P45954-2	P45954;P45954-2		0.0231812	-0.121402	0.135816	0.0103109	0.0532137	0.0844456	0.0319363	-0.129551	0.0155289	0.0308828	-0.00765473	-0.0175751	-0.0251401	-0.169351	-0.183447	0.00589228	0.0769738	0.00895239	0.0786925	0.0419238	7	7	7	22.5	22.5	22.5	47.485	0	18.934	165980000	16
ACADVL	Very long-chain specific acyl-CoA dehydrogenase, mitochondrial	P49748;P49748-3;P49748-2	P49748;P49748-3;P49748-2		0.0526015	-0.0370737	0.0359201	0.0216037	0.0397826	-0.027397	0.015152	-0.076999	0.0043962	0.0250649	0.00595731	0.00816679	-0.00987892	-0.058624	-0.0912146	0.0250948	-0.0187451	0.007159	0.0318064	-0.0091424	17	17	17	29.2	29.2	29.2	70.389	0	46.268	503160000	52
ACAT1	Acetyl-CoA acetyltransferase, mitochondrial	P24752;P24752-2	P24752		0.03265	-0.0154794	0.0232785	0.0296835	0.0166916	-0.0174137	0.00979355	0.0406981	0.00894833	-0.058674	-0.0335913	-0.0283701	-0.0233436	0.020762	0.0156983	0.0215322	0.00899854	0.00414567	-0.0529941	-0.0593836	16	16	16	37.5	37.5	37.5	45.199	0	128.24	2037200000	113
ACAT2	Acetyl-CoA acetyltransferase, cytosolic	Q9BWD1;Q9BWD1-2	Q9BWD1;Q9BWD1-2		0.0619582	0.0384794	0.0286586	0.0725716	0.026501	-0.00888601	-0.0046342	-0.0526386	-0.013322	-0.0467952	-0.027536	-0.00752717	-0.00563011	0.00826591	0.0259364	0.0343757	-0.0680813	-0.0152045	-0.0403794	-0.0624816	12	12	12	34	34	34	41.35	0	69.086	2145000000	87
ACBD3	Golgi resident protein GCP60	Q9H3P7	Q9H3P7		0.0229925	0.0282888	-0.019395	-0.030901	-0.0276368	-0.00582623	0.0842551	0.0143372	-0.0558221	0.0148707	-0.0453333	0.00970784	0.013088	0.080222	0.0343881	0.0344998	-0.0759192	-0.0169722	-0.00748987	-0.107724	11	11	11	27.1	27.1	27.1	60.593	0	91.033	564760000	40
ACBD6	Acyl-CoA-binding domain-containing protein 6	Q9BR61	Q9BR61		-0.0703117	0.124319	-0.555005	0.0939817	0.028948	-0.118577	0.355256	0.0364432	-0.0940449	0.103417	-0.143765	0.150287	0.0341762	0.00631648	0.538526	-0.404332	-0.0650316	0.0280732	0.00147267	-0.106519	4	4	4	16	16	16	31.15	0	7.2128	40822000	4
ACBD7	Acyl-CoA-binding domain-containing protein 7	Q8N6N7	Q8N6N7		-0.429059	0.786895	-0.193466	0.0551732	-0.360795	-0.0715413	0.076853	0.573904	-0.625577	0.207138	-0.115425	0.05467	0.0242172	0.580898	-0.0262272	-0.0680199	-0.199858	0.0649673	-0.0594467	-0.33167	3	3	3	35.2	35.2	35.2	9.7902	0	11.711	87608000	10
ACIN1	Apoptotic chromatin condensation inducer in the nucleus	Q9UKV3-5;Q9UKV3;Q9UKV3-3;Q9UKV3-2	Q9UKV3-5;Q9UKV3;Q9UKV3-3;Q9UKV3-2		-0.0730334	0.149864	-0.0626805	-0.113891	-0.0201318	0.0465587	0.024286	0.205433	-0.0999814	0.0865132	-0.083201	0.177229	-0.0383717	0.0251564	0.00677994	-0.0757718	-0.0871958	-0.0120926	-0.0687427	-0.0430963	18	18	18	17.7	17.7	17.7	150.56	0	74.4	658020000	53
ACLY	ATP-citrate synthase	P53396	P53396		0.058841	-0.0348149	0.0361445	0.0170788	0.0157238	-0.0268329	-0.00455257	-0.0685692	0.0430167	-0.0445852	0.0278835	-0.036256	-0.014334	-0.0361616	-0.0131341	0.00809774	0.0119847	0.00444818	-0.00612764	0.00578004	39	39	1	35.5	35.5	1.3	120.84	0	212.25	7138600000	365
ACO1	Cytoplasmic aconitate hydratase	P21399;O00408-5;O00408-4;O00408-3;O00408	P21399		0.00168994	0.0366647	-0.00288068	0.00725889	0.0154537	0.0119376	0.0264916	-0.0825852	-0.0341597	-0.0281574	-0.0101842	0.043044	-0.00723886	0.0267387	0.0532703	-0.0151709	-0.0321945	-0.0134487	-0.0399839	-0.0129147	15	15	15	17.5	17.5	17.5	98.398	0	30.501	545810000	35
ACO2	Aconitate hydratase, mitochondrial	Q99798	Q99798		0.0269388	-0.0362272	0.0456959	-0.010094	-0.0137789	0.00885758	-0.0319027	-0.0244853	0.0374054	-0.0201538	0.0077756	-0.0810441	0.0350837	-0.0582972	-0.0104769	0.00489368	0.045022	-0.047565	0.0255909	0.040392	18	18	18	29.1	29.1	29.1	85.424	0	115.99	1326200000	77
ACOT1;ACOT2	Acyl-coenzyme A thioesterase 1;Acyl-coenzyme A thioesterase 2, mitochondrial	Q86TX2;P49753;P49753-2	Q86TX2;P49753;P49753-2		0.0600912	-0.0992233	-0.077715	0.162436	0.0257878	0.124122	0.0224961	-0.155527	0.0406553	-0.015853	-0.0123352	-0.120046	0.00264416	-0.243013	0.0357108	-0.0400966	0.0508125	0.0312616	0.071935	0.0794863	6	6	6	19.2	19.2	19.2	46.277	0	10.555	1082100000	15
ACOT13	Acyl-coenzyme A thioesterase 13;Acyl-coenzyme A thioesterase 13, N-terminally processed	Q9NPJ3;Q9NPJ3-2	Q9NPJ3;Q9NPJ3-2		0.0924985	-0.00473934	0.00719671	0.0238813	-0.140763	0.163292	0.0239137	-0.0590639	0.0307615	0.0674529	0.0908356	-0.136046	-0.0201691	-0.116105	-0.0969306	-0.0267915	-0.0390317	-0.0559113	-0.0115998	0.150949	4	4	4	30.7	30.7	30.7	14.96	0	8.4944	70988000	17
ACOT7	Cytosolic acyl coenzyme A thioester hydrolase	O00154-4;O00154-6;O00154-7;O00154;O00154-5;O00154-2;O00154-3;Q6ZUV0	O00154-4;O00154-6;O00154-7;O00154;O00154-5;O00154-2;O00154-3		0.0367047	-0.0293203	0.0146846	-0.0205593	0.00452051	-0.0992468	-0.0504867	-0.109421	-0.00166249	-0.052175	0.00701678	-0.0459057	0.0584566	-0.0419118	0.0466456	0.000536632	0.0986074	0.00331283	0.0152524	0.108582	13	13	13	44.1	44.1	44.1	37.419	0	72.899	1266000000	73
ACOT9	Acyl-coenzyme A thioesterase 9, mitochondrial	Q9Y305-3;Q9Y305-2;Q9Y305;Q9Y305-4	Q9Y305-3;Q9Y305-2;Q9Y305;Q9Y305-4		-0.0727998	-0.00192684	-0.178279	0.0554076	-0.0758607	0.14482	0.163032	0.325732	-0.110766	0.0340898	-0.143978	-0.0881324	0.00801602	0.03795	0.20046	-0.194071	-0.0622601	0.0760231	-0.0411087	-0.132717	5	5	5	11.6	11.6	11.6	43.206	0	7.3595	133470000	11
ACOX1	Peroxisomal acyl-coenzyme A oxidase 1	Q15067-3;Q15067-2;Q15067	Q15067-3;Q15067-2;Q15067		-0.0242435	0.0185542	-0.134823	-0.22119	-0.0106772	-0.0153978	0.0894164	0.0352379	-0.101907	0.00119362	-0.0611509	0.0124039	0.0878394	-0.018582	0.146302	0.0302665	0.0275988	0.0129069	0.113813	-0.0439296	7	7	7	10.6	10.6	10.6	70.135	0	10.429	160090000	16
ACP1	Low molecular weight phosphotyrosine protein phosphatase	P24666;P24666-4;P24666-3;P24666-2	P24666;P24666-4;P24666-3;P24666-2		0.024758	-0.112645	0.0499783	0.0207559	0.0489254	0.11392	-0.0724354	0.16858	0.0293804	0.0548262	-0.0369828	-0.126157	-0.0203589	-0.169326	-0.0646252	-0.0282146	0.02228	-0.0144752	0.04186	0.0135865	6	6	6	47.5	47.5	47.5	18.042	0	31.665	523520000	46
ACP2	Lysosomal acid phosphatase	P11117;P11117-2	P11117		-0.0853527	0.284387	-0.11826	-0.0340897	0.0684018	0.0613742	-0.0535438	0.142328	-0.217052	-0.0274421	-0.0263224	-0.0656693	-0.0105309	0.271188	0.332746	-0.0500163	-0.32158	-0.0461081	-0.0242913	-0.136537	5	5	5	13.7	13.7	13.7	48.344	0	10.564	77003000	8
ACSL3	Long-chain-fatty-acid--CoA ligase 3	O95573	O95573		0.021519	-0.020979	0.0201561	0.00502329	0.00471372	-0.0125554	0.00962561	-0.0164052	0.00449777	0.0038825	-0.0220709	-0.0208438	0.000695989	-0.0354893	0.0024336	-0.0166235	-0.0165987	0.0275987	0.0223185	-0.0172684	15	15	13	24.4	24.4	20.4	80.419	0	40.153	506050000	55
ACSL4	Long-chain-fatty-acid--CoA ligase 4	O60488-2;O60488	O60488-2;O60488		0.00670627	-0.174693	0.00385217	-0.00844631	-0.0359388	-0.00960975	0.0307153	-0.203022	-0.0277767	-0.0625374	-0.0940523	0.0798462	-0.0057826	0.145831	-0.0362045	0.148152	0.0475642	0.0935231	0.0707461	-0.025242	10	8	8	19	14.6	14.6	74.435	0	16.314	222160000	20
ACTB	Actin, cytoplasmic 1;Actin, cytoplasmic 1, N-terminally processed	P60709;Q6S8J3;P63267-2;A5A3E0;Q562R1;P0CG38;P0CG39;Q9BYX7	P60709		0.0471924	-0.0965696	0.0269319	-0.0282743	0.0351784	0.0143883	-0.00506392	-0.073126	0.0645254	-0.0413469	0.0568579	-0.0489649	0.0247167	-0.0769488	0.0179307	0.0150975	-0.000943691	0.00709329	-0.00474882	0.00970519	27	27	1	77.9	77.9	4.5	41.736	0	323.31	174020000000	1611
ACTL6A	Actin-like protein 6A	O96019;O96019-2;O94805	O96019;O96019-2		-0.0270713	-0.102591	-0.116093	-0.0954387	-0.055748	-0.0150156	0.00333136	-0.165775	0.0676266	0.0403904	0.0673322	-0.0248645	-0.0186147	-0.0427797	0.0864847	-0.0247746	0.0712979	0.0597912	0.179793	0.0563505	5	5	5	13.5	13.5	13.5	47.46	0	8.0505	180830000	13
ACTN1	Alpha-actinin-1	P12814-2;P12814;P12814-3;P12814-4;P35609-2;P35609	P12814-2;P12814;P12814-3;P12814-4		0.0781037	-0.260287	0.0584266	-0.00515194	0.0751114	0.00384812	0.0197617	-0.144471	0.125268	0.0204557	0.0359969	0.024378	0.0334817	-0.153355	0.0553963	-0.0397286	0.0941613	-0.0395015	0.0133763	-0.0516393	29	13	13	36.6	17	17	102.71	0	49.584	541350000	41
ACTN4	Alpha-actinin-4	O43707;O43707-2;O43707-3;Q08043	O43707;O43707-2;O43707-3		0.0237797	-0.103304	0.0184188	0.0382172	0.0673019	0.0422928	0.0492454	-0.0884121	0.146789	0.0407167	0.102409	0	0.0280354	-0.106507	0.0533629	-0.042257	-0.0496097	-0.112209	-0.0481149	-0.116524	54	54	37	64.5	64.5	44.2	104.85	0	323.31	7056600000	419
ACTR10	Actin-related protein 10	Q9NZ32	Q9NZ32		0.0837667	-0.141051	0.0575852	-0.00309038	-0.0360755	0.297828	0.0717691	-0.0995959	0.0246704	-0.103776	-0.115343	0.0135545	0.0284931	-0.138487	0.0962925	-0.0931881	0.0153287	-0.0534117	0.0123566	0.0260047	3	3	3	7.7	7.7	7.7	46.306	0	4.7483	60232000	4
ACTR1A	Alpha-centractin	P61163;P42025	P61163		0.0993072	-0.0782968	0.0729199	-0.033386	0.0200839	-0.0632023	0.0466481	-0.0958101	0.11104	-0.0286151	0.0351046	-0.120562	-0.000473402	-0.0989631	-0.0400298	0.0607985	0.0474041	-0.030999	0.0112214	0.0294405	10	10	10	37.2	37.2	37.2	42.613	0	90.256	912360000	65
ACTR2	Actin-related protein 2	P61160;P61160-2	P61160;P61160-2		0.0696414	-0.114979	0.0462023	0.00844164	0.0109651	-0.0231154	0.035648	-0.0768515	0.0622818	0.0205337	0.0110763	-0.000646502	0.0436714	-0.113992	0.0154697	0.0136703	0.0424137	-0.0201355	-0.039465	-0.0472001	9	9	9	27.7	27.7	27.7	44.76	0	29.337	795010000	44
ACTR3	Actin-related protein 3	P61158;Q9P1U1-2;Q9P1U1;Q9P1U1-3	P61158		0.0871045	-0.0201489	0.0798894	-0.00554065	0.0152321	0.0176964	-0.0238704	-0.0683023	0.0280253	-0.0404268	-0.00933093	-0.086945	-0.00089445	-0.153501	0.0126502	-0.0201541	0.0181973	0.0260016	0.0427594	0.0451895	13	13	13	35.6	35.6	35.6	47.371	0	64.62	1087300000	96
ACYP1	Acylphosphatase-1	P07311	P07311		-0.0585071	-0.0431867	-0.0523513	0.0522411	0.00574512	-0.07217	0.104308	0.264076	-0.137296	-0.0694517	0.0295376	-0.18169	0.0642894	0.269119	-0.0564534	-0.219234	-0.0026603	0.0214041	0.0071908	0.0187209	2	2	2	23.2	23.2	23.2	11.261	0	7.9636	93966000	9
ACYP2	Acylphosphatase-2	P14621	P14621		-0.0761516	0.174208	-0.946862	-0.162178	-0.0983767	0.0325314	-0.421146	0.210106	-0.0774524	-0.0750551	0.0145524	1.03409	-0.0439742	0.0260361	-0.315924	-0.465715	-0.0166418	0.132162	0.848094	0.171329	2	2	2	16.2	16.2	16.2	11.139	0.0034501	2.0339	17076000	4
ADAMTS1	A disintegrin and metalloproteinase with thrombospondin motifs 1	Q9UHI8	Q9UHI8		-0.104928	-0.239225	-0.088121	-0.204573	0.0675464	0.216644	0.0294527	-0.108682	0.270387	-0.0306712	0.0226337	-0.00618657	0.00657615	-0.197355	0.122254	0.0703766	0.0378053	-0.0494946	0.025893	0.103297	4	4	4	5.7	5.7	5.7	105.36	0	8.0001	50216000	12
ADAR	Double-stranded RNA-specific adenosine deaminase	P55265-3;P55265-2;P55265;P55265-4;P55265-5	P55265-3;P55265-2;P55265;P55265-4;P55265-5		-0.00697008	-0.140747	-0.00458622	-0.0348929	0.0543305	0.00608993	0.0270462	-0.0676339	0.0552332	-0.043065	0.034166	-0.106649	0.0194548	0.015312	0.0366646	0.0244968	0.0366716	-0.0190245	0.0747503	-0.0170169	18	18	18	17.4	17.4	17.4	131.17	0	46.885	594750000	46
ADCK4	AarF domain-containing protein kinase 4	Q96D53;Q96D53-2	Q96D53;Q96D53-2		-0.177561	0.130876	-0.0378605	-0.135679	0.0193046	-0.124809	-0.240714	-0.0222157	0.158921	0.0810678	0.0204278	0.304306	0.165846	0.102464	0.0361233	-0.119485	-0.0952573	-0.283567	0.15514	0.00630182	3	3	3	8.1	8.1	8.1	60.069	0	8.7965	33385000	6
ADD1	Alpha-adducin	P35611-2;P35611-6;P35611;P35611-3;P35611-4;P35611-5	P35611-2;P35611-6;P35611;P35611-3;P35611-4;P35611-5		-0.0443846	-0.13959	-0.0482213	-0.128834	-0.0657132	0.039746	-0.155695	0.204606	-0.0123088	0.0614434	-0.0644789	0.0551813	0.00625305	0.00883561	-0.021082	0.0495482	0.0363254	0.0866788	0.0963389	-0.0210182	10	10	10	20.8	20.8	20.8	69.984	0	25.366	211350000	28
ADH5	Alcohol dehydrogenase class-3	P11766	P11766		-0.00202557	-0.0201581	0.0523643	0.00528537	-0.0131851	-0.0946184	0.0545979	-0.0883659	-0.105911	-0.0370905	-0.17536	0.108663	0.051044	0.0976139	0.0764433	0.00512867	0.0660998	0.0355168	-0.000730135	-0.0716815	10	10	10	28.6	28.6	28.6	39.724	0	26.102	373110000	31
ADI1	1,2-dihydroxy-3-keto-5-methylthiopentene dioxygenase	Q9BV57;Q9BV57-2	Q9BV57		-0.0871967	0.222528	0.0115487	0.0198153	0.00473689	0.0363904	0.0565898	0.104348	-0.142145	-0.0790916	-0.107252	0.172243	0.0383416	0.254976	0.0744078	0.00991297	-0.217876	-0.0533784	-0.198799	-0.17647	4	4	4	24.6	24.6	24.6	21.498	0	14.164	306810000	16
ADK	Adenosine kinase	P55263-3;P55263;P55263-2;P55263-4	P55263-3;P55263;P55263-2;P55263-4		0.0111813	0.0124856	0.1701	-0.282072	-0.0743525	-0.0704051	0.0294847	-0.0364478	0.0639852	-0.0974405	-0.0449851	0.0664439	0.0665425	-0.103763	0.155898	-0.0234272	0.171876	-0.00282434	0.00619736	-0.0748467	5	5	5	19	19	19	34.084	0	14.3	91282000	8
ADNP	Activity-dependent neuroprotector homeobox protein	Q9H2P0	Q9H2P0		-0.217939	-0.03938	-0.109219	-0.133846	-0.182573	0.00152859	0.141194	0.0936348	-0.177063	0.0540907	-0.102124	0.082305	0.101935	0.378859	0.212644	-0.257622	0.033865	0.0239606	0.154488	-0.115108	2	2	2	1.7	1.7	1.7	123.56	0	4.6997	33027000	4
ADO	2-aminoethanethiol dioxygenase	Q96SZ5	Q96SZ5		-0.0427853	0.147319	-0.199937	-0.0800495	-0.086284	0.0203235	-0.024911	0.113968	-0.0585954	0.0354653	-0.105925	0.0998816	-0.124519	0.0836714	0.215213	-0.0477565	0.000823945	0.00186572	-0.0115525	0.00741428	3	3	3	12.6	12.6	12.6	29.751	0	5.5111	67547000	8
ADPGK	ADP-dependent glucokinase	Q9BRR6-2;Q9BRR6;Q9BRR6-6;Q9BRR6-4;Q9BRR6-3;Q9BRR6-5	Q9BRR6-2;Q9BRR6		-0.10684	0.259955	-0.707625	-1.10373	-0.0387647	0.0763086	-0.2953	-0.178609	-0.0399438	-0.124735	0.0934618	0.768866	0.0642704	-0.0230089	0.600801	0.527758	-0.0862097	-0.00374607	0.126343	0.134385	4	4	4	12.1	12.1	12.1	53.96	0	8.8241	68006000	7
ADPRHL2	Poly(ADP-ribose) glycohydrolase ARH3	Q9NX46	Q9NX46		0.000750691	-0.600414	-0.235195	-0.194736	-0.188105	0.247284	-0.129585	0.0634779	-0.195633	-0.232065	-0.123089	-0.00821954	0.102128	0.530827	0.0643933	0.636708	0.0973404	0.215173	-0.0450763	-0.0623329	2	2	2	4.4	4.4	4.4	38.946	0.0042161	1.9771	16202000	3
ADRM1	Proteasomal ubiquitin receptor ADRM1	Q16186	Q16186		-0.166866	-0.0566104	-0.0399576	-0.00572538	-0.0194994	-0.177204	-0.00583515	0.0341817	-0.106973	0.0644863	-0.14938	0.137186	0.0554824	0.238935	0.102452	0.00147648	0.0418679	0.103666	-0.00583573	-0.102218	12	12	12	23.8	23.8	23.8	42.153	0	46.467	770070000	49
ADSL	Adenylosuccinate lyase	P30566;P30566-2	P30566;P30566-2		0.0396356	-0.0678181	-0.0567612	-0.0575088	-0.00295133	-0.0760218	-0.0929321	0.134762	0.0975207	-0.0181554	0.0182202	0.0262996	0.0263189	-0.0681148	-0.0111387	0.0544523	0.060534	-0.0136624	-0.0446596	-0.00438869	10	10	10	30	30	30	54.889	0	91.245	677630000	55
ADSS	Adenylosuccinate synthetase isozyme 2	P30520	P30520		0.0822435	0.0148651	0.0601236	0.00489835	-0.0018054	-0.00420289	-0.0247934	-0.0751362	0.00641966	-0.0146749	0.00689691	-0.0852883	-0.0107679	-0.0956439	0.0214241	0.0303202	0.0251638	-0.0243115	0.00335369	0.0245464	16	16	16	43.6	43.6	43.6	50.097	0	91.932	1123600000	104
AFG3L2	AFG3-like protein 2	Q9Y4W6;Q01484-5;Q01484-2;Q01484	Q9Y4W6		0.0326833	-0.00514644	0.0832547	0.0181894	0.0152906	-0.0621726	-0.0175973	-0.0415901	0.019842	-0.0248502	-0.0235723	-0.018808	-0.0520082	0.015757	-0.0449119	-0.022733	0.0178323	0.0200576	-0.00273962	0.0368532	18	18	18	18.2	18.2	18.2	88.583	0	36.417	616810000	59
AGFG1	Arf-GAP domain and FG repeat-containing protein 1	P52594-2;P52594-3;P52594;P52594-4;O95081-2;O95081	P52594-2;P52594-3;P52594;P52594-4		0.0699007	0.249104	0.0231044	-0.00179978	0.0458904	-0.0427202	0.0282199	-0.0519949	0.0673277	-0.0421181	0.133209	-0.0521963	-0.00805025	-0.191235	-0.148995	-0.0077672	-0.069709	-0.101105	0.0760299	-0.0314643	4	4	4	10.3	10.3	10.3	54.181	0	13.523	103520000	9
AGK	Acylglycerol kinase, mitochondrial	Q53H12;Q53H12-2	Q53H12		0.00446102	-0.213769	-0.0878794	-0.0636035	-0.0722951	0.0192853	0.0377205	0.114377	0.0620134	0.0182786	0.0896411	-0.0571525	0.0227024	-0.0935714	-0.164291	0.0215145	0.117538	0.112643	0.0193836	0.0566343	7	7	7	15.9	15.9	15.9	47.137	0	12.945	172000000	29
AGL	Glycogen debranching enzyme;4-alpha-glucanotransferase;Amylo-alpha-1,6-glucosidase	P35573-2;P35573-3;P35573	P35573-2;P35573-3;P35573		-0.0330116	0.000876844	0.00440101	0.0572814	-0.0480574	0.0876696	0.00829008	-0.00469255	0.0483787	0.0433031	0.0345073	-0.09255	-0.0929877	0.077556	-0.144061	0.062327	-0.0292011	-0.0772411	-0.0085495	0.0493912	6	6	6	4.1	4.1	4.1	172.62	0	10.414	112120000	16
AGPS	Alkyldihydroxyacetonephosphate synthase, peroxisomal	O00116	O00116		-0.0253014	-0.0358332	0.0134534	0.104673	-0.0333224	0.0131998	-0.113025	-0.0732759	0.0533881	-0.047775	0.0181414	-0.00722083	0.0339832	0.037056	-0.0726123	0.0151908	0.0202276	-0.0383372	0.0321019	0.0489181	15	15	15	30.4	30.4	30.4	72.911	0	49.755	500920000	58
AGTRAP	Type-1 angiotensin II receptor-associated protein	Q6RW13-2;Q6RW13	Q6RW13-2;Q6RW13		-0.0101931	-0.0732265	0.452487	1.29807	-0.132056	0.00421157	-0.336681	0.069709	-0.0751507	0.0724063	0.786409	-0.764347	0.00842972	0.0930408	-0.935031	0.320322	0.0887674	0.00105644	-1.49123	0.566641	2	2	2	19.7	19.7	19.7	16.669	0	18.547	32388000	5
AHCY	Adenosylhomocysteinase	P23526;P23526-2	P23526;P23526-2		0.0690758	-0.00216681	0.0618911	0.0485416	0.015884	-0.0238193	-0.0135846	-0.0787266	0.0399897	-0.0449686	0.00835532	-0.0520916	-0.0229457	-0.048403	-0.0146551	0.0141261	0.00996289	-0.0153234	0.00137701	-0.00888824	20	20	19	42.8	42.8	41.2	47.716	0	125.52	5635200000	207
AHCYL1;AHCYL2	Putative adenosylhomocysteinase 2;Putative adenosylhomocysteinase 3	O43865-2;O43865;Q96HN2-4;Q96HN2-3	O43865-2;O43865;Q96HN2-4;Q96HN2-3		-0.052641	0.123469	0.0301259	-0.0453077	0.0780814	-0.0500494	0.0592206	0.0619068	-0.182466	-0.0625527	-0.0402021	0.0809248	0.106371	0.0924458	-0.026436	0.00897131	-0.0470853	-0.0282879	-0.0518392	-0.111019	3	3	1	6.4	6.4	1.7	53.753	0	8.748	225020000	13
AHNAK	Neuroblast differentiation-associated protein AHNAK	Q09666;Q09666-2;P48552	Q09666		0.000413924	-0.107654	-0.0456397	0.0281271	0.0326199	0.0826821	-0.0289256	-0.0604277	0.0688829	-0.018162	0.0699434	-0.042	0.00586939	-0.0860209	-0.0608951	0.0330411	0.0416028	-0.0429487	0.0255448	0.0475768	61	61	61	24.7	24.7	24.7	629.09	0	177.77	2099800000	156
AHSA1	Activator of 90 kDa heat shock protein ATPase homolog 1	O95433;O95433-2	O95433;O95433-2		0.0585903	0.00434107	0.061205	0.0130217	0.041085	-0.0553753	0.0141259	-0.0522863	0.0281479	-0.0212306	-0.00163287	0.0275179	0.0144299	-0.0618202	-0.0087741	0.010949	-0.0415745	0.010692	-0.0457797	-0.0520014	14	14	14	47	47	47	38.274	0	88.159	1216100000	71
AIDA	Axin interactor, dorsalization-associated protein	Q96BJ3;Q96BJ3-2;Q96BJ3-3	Q96BJ3;Q96BJ3-2;Q96BJ3-3		0.48896	-0.961012	-0.056268	0.125417	0.751347	0.208551	-0.107487	-0.141652	0.56871	-0.33725	0.0748238	0.147991	0.16662	-0.964534	0.208853	-0.474528	0.279057	-0.223163	0.178463	0.0107319	2	2	2	11.4	11.4	11.4	35.023	0	9.9126	39330000	4
AIF1L	Allograft inflammatory factor 1-like	Q9BQI0-3;Q9BQI0;Q9BQI0-4;Q9BQI0-2	Q9BQI0-3;Q9BQI0;Q9BQI0-4;Q9BQI0-2		-0.00956038	0.236232	0.111355	-0.105267	-0.0519861	0.138776	-0.125815	0.559051	-0.094774	0.19578	-0.0846172	0.472379	0.0475375	0.0402983	0.0173018	-0.153979	-0.329984	-0.195034	-0.387088	-0.336976	4	4	4	26.1	26.1	26.1	16.183	0	13.028	337090000	27
AIFM1	Apoptosis-inducing factor 1, mitochondrial	O95831-3;O95831;O95831-2;O95831-6;O95831-4;O95831-5	O95831-3;O95831;O95831-2		0.0193779	0.00367254	0.0165892	0.00602351	0.0288311	-0.0442031	-0.000338554	-0.0799764	0.0155509	-0.00593472	0.0222499	-0.0206628	-0.0028346	-0.0136864	-0.00916237	0.00695781	0.00652584	-0.0300138	0.0114702	0.0131946	15	15	15	29.4	29.4	29.4	66.294	0	108.96	1811300000	113
AIMP1	Aminoacyl tRNA synthase complex-interacting multifunctional protein 1;Endothelial monocyte-activating polypeptide 2	Q12904;Q12904-2	Q12904;Q12904-2		0.114868	-0.0164137	0.116047	0.0344846	0.0201137	0.00778556	0.00833473	-0.0235164	0.0359566	-0.0590171	0.0216964	-0.0781135	-0.0488503	-0.0373308	-0.0112093	-0.0657898	-0.0611906	0.0213636	-0.0361586	0.000570416	8	8	8	34.6	34.6	34.6	34.352	0	46.63	405830000	35
AIMP2	Aminoacyl tRNA synthase complex-interacting multifunctional protein 2	Q13155;Q13155-2	Q13155;Q13155-2		0.0650758	-0.0636296	-0.00252019	0.0324864	-0.00602216	-0.0759589	0.0314955	-0.040224	0.0557135	-0.0829146	0.0229064	-0.0468102	-0.0194927	0.0302681	-0.0250521	-0.0106771	-0.0148921	0.089138	0.0185192	-0.0137787	9	9	9	33.1	33.1	33.1	35.348	0	66.153	605380000	46
AIP	AH receptor-interacting protein	O00170	O00170		0.0212809	-0.229133	0.0505614	-0.0601429	0.0998945	0.041832	-0.000240803	-0.0964239	-0.0175356	-0.0317989	-0.0495442	0.0417223	0.091363	0.0509064	0.0182887	0.0394938	-0.00684044	-0.042683	0.0637931	-0.0411625	10	10	10	38.5	38.5	38.5	37.636	0	48.711	480780000	41
AK1	Adenylate kinase isoenzyme 1	P00568;Q9Y6K8-2;Q9Y6K8-3;Q9Y6K8	P00568		0.00649521	-0.147165	-0.0184387	-0.0115207	-0.0237168	-0.0980891	0.000183672	-0.0343453	0.125082	0.0713859	0.0661395	-0.0135955	0.0266506	-0.0220391	0.0269567	-0.0466257	0.0499824	-0.0113003	-0.00228786	-0.000120997	10	10	10	38.1	38.1	38.1	21.635	0	41.666	674990000	57
AK2	Adenylate kinase 2, mitochondrial;Adenylate kinase 2, mitochondrial, N-terminally processed	P54819-5;P54819-2;P54819;P54819-3;P54819-6;P54819-4	P54819-5;P54819-2;P54819;P54819-3;P54819-6;P54819-4		0.129103	-0.0766397	0.12012	0.000302985	0.0480959	-0.0123403	0.0278965	-0.138257	0.0439212	-0.00791588	-0.013395	-0.0286845	-0.00625964	-0.225718	-0.0951975	0.0706524	0.0699057	0.0151337	0.00988483	0.0130225	8	8	8	49.6	49.6	49.6	24.648	0	42.279	1000300000	61
AK3	GTP:AMP phosphotransferase AK3, mitochondrial	Q9UIJ7;Q9UIJ7-2;Q9UIJ7-3	Q9UIJ7;Q9UIJ7-2		0.0425921	-0.0681937	0.11622	-0.00151958	0.141246	0.00397344	-0.049541	-0.0698784	0.0564756	-0.0557949	0.0475599	-0.0487681	-0.00234747	-0.152083	0.0578452	0.0121644	0.00524107	0.00617605	-0.0423881	-0.0553493	9	9	9	42.3	42.3	42.3	25.565	0	34.713	328640000	31
AK4	Adenylate kinase 4, mitochondrial	P27144	P27144		-0.0926569	0.11317	0.0564649	0.0848626	0.053391	0.0705705	0.0154321	0.0325208	-0.0794972	-0.0628177	-0.0922933	0.0407861	-0.0569185	-0.00753623	-0.00757468	-0.0817389	-0.0241501	0.0637304	-0.0896481	0.00753337	5	5	5	25.1	25.1	25.1	25.268	0	22.396	80906000	9
AK6	Adenylate kinase isoenzyme 6	Q9Y3D8-2;Q9Y3D8	Q9Y3D8-2;Q9Y3D8		-0.0466714	-0.118482	0.112509	-0.0767797	0.119349	-0.00267606	0.168376	-0.0206249	0.0207124	0.0587686	0.0681507	-0.0285778	0.0193377	0.0125838	-0.289074	0.120664	0.0433952	-0.129032	-0.07895	-0.00934887	3	3	3	20.7	20.7	20.7	19.805	0	9.8698	83411000	8
AKAP1	A-kinase anchor protein 1, mitochondrial	Q92667-2;Q92667	Q92667-2;Q92667		-0.0271072	-0.103997	-0.279626	0.0921476	0.220295	-0.0743823	0.220418	0.292107	-0.0184956	-0.220401	-0.0102649	-0.0856312	-0.280893	0.392098	-0.00354642	-0.288726	0.0128094	0.0773583	-0.118265	0.147733	2	2	2	5.6	5.6	5.6	62.921	0	7.8496	30019000	3
AKAP12	A-kinase anchor protein 12	Q02952;Q02952-3;Q02952-2	Q02952;Q02952-3;Q02952-2		-0.0776589	0.25419	-0.0365933	-0.0815514	-0.0357827	0.0645134	0.0213042	0.196503	-0.1532	0.0574098	-0.103179	0.147838	0.00100823	0.100857	0.079684	-0.0540715	-0.157165	-0.0768855	-0.103653	-0.0999359	40	40	40	30.8	30.8	30.8	191.48	0	308.49	2593400000	121
AKAP2	A-kinase anchor protein 2	Q9Y2D5-6;Q9Y2D5-4;Q9Y2D5;Q9Y2D5-5;Q9Y2D5-7;Q8IXS6-2;Q8IXS6	Q9Y2D5-6;Q9Y2D5-4;Q9Y2D5;Q9Y2D5-5;Q9Y2D5-7		-0.155241	0.110268	-0.205165	0.0824718	0.0511542	0.00166812	-0.076647	0.518294	-0.422614	0.0655522	-0.174845	0.00320366	0.0442125	0.358924	-0.0737206	0.00201854	-0.135437	0.0587986	-0.0398529	-0.0694119	7	7	7	7.2	7.2	7.2	120.63	0	10.338	78654000	10
AKAP8	A-kinase anchor protein 8	O43823	O43823		0.0331119	0.131731	-0.0324043	-0.0400594	0.0669867	0.0793025	0.0595137	-0.00907201	-0.138775	-0.0264968	-0.059343	0.0847932	-0.0452444	-0.0432369	0.11364	-0.0996443	-0.0429535	-0.0371405	-0.0937986	0.04272	5	5	5	10.4	10.4	10.4	76.107	0	14.185	118450000	12
AKAP8L	A-kinase anchor protein 8-like	Q9ULX6;Q9ULX6-2	Q9ULX6;Q9ULX6-2		-0.0566448	-0.158977	-0.0535029	-0.102039	0.1032	-0.0721683	-0.146647	0.115659	0.0912567	-0.00605831	-0.0254385	0.0997911	0.0517159	-0.134013	0.193297	-0.0893327	0.0390561	0.119918	-0.16779	0.142349	5	5	5	8.8	8.8	8.8	71.639	0	6.3896	76984000	7
AKR1A1	Alcohol dehydrogenase [NADP(+)]	P14550	P14550		0.0344445	-0.0234572	-0.0568561	0.0260756	-0.00683213	0.0100909	0.125954	-0.00161952	-0.0412401	-0.0456577	-0.13932	0.0194794	0.0574122	0.0208647	-0.0144828	-0.022565	-0.0346734	0.00633397	0.0228839	0.00679553	8	8	8	27.1	27.1	27.1	36.573	0	14.815	254470000	20
AKR1B1	Aldose reductase	P15121;C9JRZ8;C9JRZ8-2	P15121		0.0578637	-0.0216129	0.0543301	0.0225176	0.0225247	-0.00421815	0.00527886	-0.064044	0.00538778	-0.0611913	-0.02493	-0.0166285	-0.0210791	-0.00578302	0.00218093	0.0174752	-0.0090178	0.0144115	-0.0197547	-0.0100805	15	15	15	51.3	51.3	51.3	35.853	0	124.03	3252800000	95
AKR7A2;AKR7L	Aflatoxin B1 aldehyde reductase member 2;Aflatoxin B1 aldehyde reductase member 4	O43488;Q8NHP1;Q8NHP1-3;O95154	O43488;Q8NHP1		-0.0105829	-0.0214427	-0.071079	0.000647932	0.000426672	-0.0215106	-0.013642	0.0523958	-0.015976	-0.00513859	-0.0492506	-0.0220301	-0.0387807	0.0635992	0.0837315	0.00181303	0.018994	0.00769716	-0.0128358	-0.00340575	10	10	10	28.1	28.1	28.1	39.589	0	31.215	601870000	32
AKT1	RAC-alpha serine/threonine-protein kinase	P31749	P31749		-0.0761722	-0.704045	-0.210162	-0.743979	-0.207207	-0.00109663	-0.383017	0.401181	0.299535	0.334719	0.0369698	0.357095	-0.112391	0.178223	0.0847907	0.362817	0.171494	0.0942266	-0.0402305	0.10088	3	2	1	7.7	3.3	1.9	55.686	0.0099602	1.5309	154260000	2
AKT1S1	Proline-rich AKT1 substrate 1	Q96B36;Q96B36-3;Q96B36-2	Q96B36;Q96B36-3;Q96B36-2		-0.0324685	0.374326	-0.0485237	-0.0439117	-0.0974229	0.0585992	0.00785941	0.0167465	-0.121035	-0.0334434	-0.119753	0.104471	-0.122664	0.157657	0.0413091	0.00541687	-0.194144	-0.012119	-0.0180964	0.0208271	4	4	4	16	16	16	27.383	0	18.169	175400000	15
AKT2	RAC-beta serine/threonine-protein kinase	P31751;P31751-2;P31749-2;Q9Y243-2;Q9Y243	P31751;P31751-2		-0.111804	-0.045955	0.0617764	-0.0673853	-0.0456663	-0.0568901	-0.114354	-0.0467453	-0.0326948	0.0653074	0.105799	-0.0271389	0.0395951	0.137236	0.00893009	0.0765639	-0.00940546	0.0375624	-0.00490884	-0.0261919	7	7	5	17	17	11	55.768	0	10.53	134070000	17
ALDH16A1	Aldehyde dehydrogenase family 16 member A1	Q8IZ83;Q8IZ83-3	Q8IZ83;Q8IZ83-3		-0.0108566	0.103711	-0.0732741	0.0877539	-0.0472532	0.00855966	-0.058002	0.0267431	0.0435057	0.000564385	0.0170977	0.036068	-0.0971036	-0.124234	0.0599414	-0.0100047	0.0170743	0.0833178	-0.0798455	-0.0401325	8	8	8	11.8	11.8	11.8	85.126	0	28.749	327630000	17
ALDH18A1	Delta-1-pyrroline-5-carboxylate synthase;Glutamate 5-kinase;Gamma-glutamyl phosphate reductase	P54886-2;P54886	P54886-2;P54886		0.0170673	0.0285502	0.00146788	-0.0310905	-0.000989147	-0.0104343	-0.0450447	0.065669	0.0452112	-0.0498102	0.0476484	-0.0702651	-0.00625334	-0.0108328	-0.0308544	0.0245886	0.0140457	-0.0492692	0.00932464	-0.00509858	22	22	22	27.6	27.6	27.6	87.088	0	81.319	1290900000	77
ALDH1A2	Retinal dehydrogenase 2	O94788-2;O94788;O94788-4;O94788-3	O94788-2;O94788;O94788-4;O94788-3		0.302658	-0.152851	-0.291081	-0.0944789	0.146496	-0.0819184	0.372287	0.365494	0.0744685	0.0071723	-0.308001	-0.355817	0.0475067	-0.52431	0.616938	-0.156137	0.290367	-0.132304	-0.0961847	-0.0866746	4	2	2	9.2	5.8	5.8	53.059	0.00030855	3.4922	15835000	3
ALDH1B1	Aldehyde dehydrogenase X, mitochondrial	P30837;P47895	P30837		0.029848	-0.243881	0.00242652	0.0679202	0.0629523	-0.157253	0.0602135	0.0555803	0.0949849	0.0480296	-0.0500954	-0.216604	0.049641	0.012711	-0.0305481	0.0466883	0.108983	-0.0287304	0.0567797	-0.0260153	7	6	6	15.9	14.3	14.3	57.206	0	22.532	100030000	9
ALDH2	Aldehyde dehydrogenase, mitochondrial	P05091;P05091-2;P00352	P05091;P05091-2		0.0572745	0.0554832	0.0682397	0.0905243	-0.0406132	0.0797902	0.0546355	-0.113167	0.0772597	0.0395969	-0.00412828	-0.0965576	-0.0200204	-0.257873	0.00331599	-0.0296638	0.0345214	-0.0481332	-0.0569249	0.0500708	11	11	9	24.2	24.2	21.1	56.381	0	33.334	397870000	34
ALDH3A2	Fatty aldehyde dehydrogenase	P51648;P51648-2	P51648;P51648-2		0.100149	-0.0928445	-0.0459957	0.133414	0.00920505	0.0407784	0.0321465	-0.0118554	0.0982435	0.0516802	0.0647838	-0.107575	-0.0413358	-0.00187558	-0.0352435	-0.0354178	-0.00260785	-0.184107	-0.0773369	0.0494246	10	10	10	23.1	23.1	23.1	54.847	0	41.841	282640000	33
ALDH5A1	Succinate-semialdehyde dehydrogenase, mitochondrial	P51649;P51649-2	P51649;P51649-2		-0.0221026	0.0332722	-0.00700408	-0.0314219	-0.0298003	-0.0684355	0.0028798	-0.0143781	-0.0563776	0.00593138	-0.0599056	0.00686759	-0.0270727	0.119172	0.0110905	0.0538039	0.00622019	0.0164783	-0.0221147	0.0265276	11	11	11	21.1	21.1	21.1	57.214	0	38.843	329880000	29
ALDH7A1	Alpha-aminoadipic semialdehyde dehydrogenase	P49419-2;P49419;P49419-4	P49419-2;P49419;P49419-4		0.0396967	-0.00305778	0.0573075	-0.00572833	0.000390433	-0.0207735	0.0469239	-0.0634136	0.0415173	-0.0217564	0.0258551	-0.0810473	0.0112205	-0.0368885	-0.0614091	0.0482675	-0.00300917	-0.030054	-0.00509672	0.00468618	18	18	18	40.7	40.7	40.7	55.366	0	134.44	1759600000	118
ALDH9A1	4-trimethylaminobutyraldehyde dehydrogenase	P49189;P49189-2	P49189;P49189-2		0.0497235	-0.064281	0.0837479	0.0735818	0.0233356	0.0430348	0.00372982	-0.109781	0.0109117	-0.00644626	0.0604512	-0.0709796	-0.0260989	-0.16366	-0.0616526	0.0470713	0.0380177	0.072748	-0.0136782	-0.0461459	15	15	15	33.4	33.4	33.4	53.801	0	87.687	1045900000	69
ALDOA	Fructose-bisphosphate aldolase A	P04075;P04075-2;P05062	P04075;P04075-2		0.0310444	-0.0282506	0.0287393	-0.00754222	-0.000882335	-0.0755245	-0.0161197	-0.0468969	0.0707697	-0.0239065	0.0377169	-0.029835	0.0028943	-0.0169097	-0.00229371	0.0404817	-0.000600785	0.0186514	-0.00918607	-0.0287191	31	31	24	74.7	74.7	61	39.42	0	323.31	27578000000	466
ALDOC	Fructose-bisphosphate aldolase C	P09972	P09972		0.412984	-1.44533	0.129683	-0.299608	0.232902	0.35581	0.604404	-0.430289	0.679748	0.151713	0.216238	-0.292795	0.336043	-0.718156	-0.595825	-0.114471	0.361514	-0.389943	0.196987	0.552019	9	2	2	20.9	7.1	7.1	39.455	0	25.801	171780000	13
ALG1	Chitobiosyldiphosphodolichol beta-mannosyltransferase	Q9BT22-2;Q9BT22	Q9BT22-2;Q9BT22		-0.0899323	0.243159	-0.0249405	0.0744811	-0.151085	-0.0316128	0.122662	-0.156104	-0.113221	0.0166272	0.0960214	-0.0396714	-0.0532841	0.239861	-0.210601	-0.00486679	-0.0756428	-0.00758348	0.0521816	0.0571837	5	5	5	11.3	11.3	11.3	40.337	0	8.1718	141250000	10
ALG9	Alpha-1,2-mannosyltransferase ALG9	Q9H6U8;Q9H6U8-3;Q9H6U8-2;Q9H6U8-4	Q9H6U8;Q9H6U8-3;Q9H6U8-2;Q9H6U8-4		0.59446	-0.404029	0.144695	0.0211302	0.0188678	0.388988	0.125954	-0.311704	0.114061	0.519452	0.0118915	-0.222395	0.186247	-2.12428	0.208997	0.0184825	0.0821396	0.601375	-0.0284863	-0.00222015	2	2	2	5.2	5.2	5.2	69.863	0	4.7755	49728000	3
ALKBH5	RNA demethylase ALKBH5	Q6P6C2;Q6P6C2-1;Q6P6C2-3	Q6P6C2;Q6P6C2-1;Q6P6C2-3		-0.230167	0.0411808	-0.170817	-0.284582	-0.184405	-0.085085	0.00272092	0.221889	-0.222	-0.0762631	-0.104545	-0.0111736	-0.0906878	0.33418	-0.140016	-0.0621577	0.242577	0.247956	0.239669	0.275357	4	4	4	15.7	15.7	15.7	44.255	0	15.042	63140000	8
ALYREF	THO complex subunit 4	Q86V81	Q86V81		-0.445143	0.43539	-0.240393	-0.0325038	-0.00690117	-0.0610717	0.119458	0.232013	-0.493744	0.0645685	-0.329236	0.203198	0.0587709	0.556863	0.268956	-0.0789518	-0.180867	0.0494206	-0.0653366	-0.110859	10	10	10	44	44	44	26.888	0	178.71	3710600000	66
AMPD2	AMP deaminase 2	Q01433-2;Q01433;Q01433-3;Q01433-5;Q01433-4;Q01432-6;Q01432;Q01432-5;Q01432-4	Q01433-2;Q01433;Q01433-3;Q01433-5;Q01433-4		-0.014229	0.10501	-0.100545	-0.176326	-0.170625	-0.0777032	-0.00661755	0.156044	-0.0242484	0.139416	-0.0189288	0.0511966	-0.0240571	-0.00876683	-0.0544276	0.00606422	0.0525174	-2.97055e-05	0.040626	0.0692592	8	8	8	9.5	9.5	9.5	92.07	0	12.763	191440000	17
ANAPC7	Anaphase-promoting complex subunit 7	Q9UJX3-2;Q9UJX3	Q9UJX3-2;Q9UJX3		0.0519254	-0.196423	-0.00326072	0.218344	0.0403024	0.188356	-0.0446654	-0.143211	0.0539997	-0.0482192	-0.0117096	0.0694546	0.0604345	-0.181721	0.175847	-0.105089	0.0185789	-0.00994705	-0.0748174	-0.114547	6	6	6	12.8	12.8	12.8	60.002	0	10.97	93745000	9
ANGEL2	Protein angel homolog 2	Q5VTE6-2;Q5VTE6	Q5VTE6-2;Q5VTE6		0.285192	1.01759	-0.083458	0.00825129	0.249788	-0.199729	-0.0136881	-0.17985	-0.110824	0.127509	0.0451648	0.161699	-0.373249	-1.02988	-0.0717139	0.0406149	-0.12562	0.136506	-0.0295616	0.0888867	2	2	2	5.6	5.6	5.6	42.106	0.0031974	2.0606	22310000	2
ANKFY1	Rabankyrin-5	Q9P2R3;Q9P2R3-2;Q9P2R3-4	Q9P2R3;Q9P2R3-2;Q9P2R3-4		-0.0333625	0.0639368	-0.0764001	-0.164645	0.0543464	-0.0363232	-0.0476783	0.240152	0.0603904	-0.0280126	0.204491	-0.4975	-0.0254847	-0.00686413	0.00576526	0.123461	-0.0875706	0.0162296	-0.00281801	0.181518	10	10	10	10.4	10.4	10.4	128.4	0	48.67	240740000	25
ANKHD1;ANKRD17	Ankyrin repeat and KH domain-containing protein 1;Ankyrin repeat domain-containing protein 17	Q8IWZ3;Q8IWZ3-4;Q8IWZ3-6;Q8IWZ3-5;Q8IWZ3-2;O75179-6;O75179-7;O75179-2;O75179;Q8IWZ3-3;O75179-5;O75179-3;O75179-4	Q8IWZ3;Q8IWZ3-4;Q8IWZ3-6;Q8IWZ3-5;Q8IWZ3-2;O75179-6;O75179-7;O75179-2;O75179		-0.0264806	-0.31491	-0.118754	0.0131336	0.182369	0.136181	0.198477	-0.0403326	0.11049	-0.0174276	0.161364	-0.0813904	-0.0275664	-0.142987	-0.34118	-0.139193	0.220181	-0.142564	0.219983	0.0942373	5	5	5	2.4	2.4	2.4	269.45	0	12.141	79908000	13
ANKLE2	Ankyrin repeat and LEM domain-containing protein 2	Q86XL3-2;Q86XL3	Q86XL3-2;Q86XL3		0.0301405	-0.0572593	0.107714	0.234713	0.106643	0.122785	-0.408222	0.147748	0.0879313	0.15176	0.0817723	-0.813607	-0.00244989	-0.633677	0.295811	0.197035	0.0203755	0.151037	0.126021	-0.00264043	2	2	2	4	4	4	72.64	0	5.678	13917000	2
ANKRD28	Serine/threonine-protein phosphatase 6 regulatory ankyrin repeat subunit A	O15084-2;O15084;O15084-4;O15084-1	O15084-2;O15084;O15084-4;O15084-1		0.0439195	-0.0302615	0.148312	-0.298764	0.0345882	-0.0328194	0.0885404	-0.177958	0.0225514	0.0280635	0.183223	-0.102802	-0.087566	0.0295081	-0.0498515	-0.0193595	-0.053348	0.0226497	0.26461	-0.069606	2	2	2	2.1	2.1	2.1	96.16	0	3.7342	126480000	7
ANKS1A	Ankyrin repeat and SAM domain-containing protein 1A	Q92625	Q92625		-0.0192018	-1.22029	0.149963	-1.06148	0.0176981	-0.185556	-0.195054	0.169039	0.195409	0.275705	0.036905	0.124944	0.0715455	0.415917	0.296473	0.339417	0.347249	0.0788092	-0.0961625	0.202302	3	3	3	3.8	3.8	3.8	123.11	0.00059559	3.1203	25643000	4
ANKZF1	Ankyrin repeat and zinc finger domain-containing protein 1	Q9H8Y5	Q9H8Y5		0.119236	0.0721387	-0.0699528	0.17828	-0.131751	0.00720949	-0.062516	-0.651049	0.0394585	0.274812	0.200958	-0.010012	-0.115822	-0.630995	0.215409	-0.0417223	-0.0929109	0.435911	0.144732	0.0622175	2	2	2	2.5	2.5	2.5	80.926	0.0070886	1.6508	15291000	2
ANLN	Actin-binding protein anillin	Q9NQW6-2;Q9NQW6	Q9NQW6-2;Q9NQW6		-0.0392134	-0.0395876	-0.0435143	-0.050558	-0.0465335	0.0310337	0.00127888	0.0567739	-0.0605834	-0.0170398	-0.00993568	-0.0378585	-0.0367897	-0.018645	-0.0592551	-0.133776	0.0760292	0.128615	0.144082	0.0991073	15	15	15	14.3	14.3	14.3	120.01	0	37.834	300310000	29
ANP32A	Acidic leucine-rich nuclear phosphoprotein 32 family member A	P39687;O95626;O43423	P39687		-0.297588	0.597641	-0.151817	-0.134331	-0.110992	-0.140394	0.0567454	0.414177	-0.345025	0.121868	-0.25816	0.369219	0.0451549	0.518479	0.210861	-0.0247014	-0.324994	-0.0868636	-0.184517	-0.331131	12	12	11	43	43	43	28.585	0	120.83	7425300000	162
ANP32B	Acidic leucine-rich nuclear phosphoprotein 32 family member B	Q92688-2;Q92688	Q92688-2;Q92688		-0.0315355	0.298621	0.0142175	0.00266095	-0.0176535	-0.0378007	0.047886	0.115322	-0.171534	0.0233597	-0.0919401	0.135438	-0.0511559	0.189273	-0.0287593	0.00770464	-0.183834	-0.0404552	-0.0924144	-0.14377	7	6	6	34.4	26.2	26.2	22.276	0	45.326	2300500000	59
ANP32E	Acidic leucine-rich nuclear phosphoprotein 32 family member E	Q9BTT0-3;Q9BTT0;Q9BTT0-2	Q9BTT0-3;Q9BTT0		0.0535976	-0.0328066	0.0998649	-0.0157919	-0.0683637	0.0797716	-0.0632173	-0.29435	0.131572	-0.0439445	0.0815512	0.104858	-0.0502027	-0.0266736	-0.0987077	0.0303857	-0.00987646	-0.0557879	-0.00428648	0.126039	3	3	3	25.9	25.9	25.9	25.125	0	10.792	139190000	21
ANXA1	Annexin A1	P04083	P04083		0.0539927	-0.0014686	0.0490594	0.0307356	0.0270784	0.01412	-0.0176597	-0.111385	0.0219539	-0.0390575	0.0358831	-0.0254755	0.000646494	-0.0462227	0.0236226	0.0122273	-0.0255499	-0.0282073	-0.0120765	-0.0185862	26	26	26	74.6	74.6	74.6	38.714	0	323.31	5070600000	228
ANXA11	Annexin A11	P50995-2;P50995;P27216;P27216-2	P50995-2;P50995		0.0764581	-0.0239984	0.0859826	-0.0262209	0.0111451	0.00312285	0.00549629	-0.11671	0.0683337	-0.0582677	0.00542259	-0.0340874	-0.0386385	-0.0715449	-0.0447265	-0.00246134	-0.0103743	0.0210496	0.0514962	0.0421532	14	14	14	30.5	30.5	30.5	51.242	0	64.467	1092300000	63
ANXA2;ANXA2P2	Annexin A2;Putative annexin A2-like protein	P07355;P07355-2;A6NMY6	P07355;P07355-2;A6NMY6		0.0498772	-0.0677503	0.0414189	0.0835466	0.0490593	0.0588097	0.0233602	-0.0972036	0.0868235	-0.0485785	0.0537306	-0.0936304	-0.0303149	-0.091247	-0.0504565	-0.000734616	0.040733	-0.0701265	0.0199388	-0.0136247	30	30	30	78.8	78.8	78.8	38.604	0	321.33	7727600000	248
ANXA3	Annexin A3	P12429	P12429		0.0323862	-0.0416669	0.090965	0.0250061	0.0538376	-0.0609409	-0.0330518	-0.113477	0.0689787	-0.0933092	0.0273709	-0.0863836	-0.0516387	-0.00249201	-0.0299727	0.0137048	0.0187416	0.053389	0.0107614	0.0614226	14	14	14	48	48	48	36.375	0	40.606	595480000	46
ANXA4	Annexin A4	P09525-2;P09525	P09525-2;P09525		0.0314203	-0.0763519	0.0380021	0.00891991	-0.0247394	0.0123262	-0.0564393	-0.0185587	0.0413795	0.00764875	0.0341318	-0.0754856	0.0172091	-0.0495109	0.00111169	0.0118665	-0.00577149	0.0236755	0.0294929	-0.00669611	11	11	11	41.4	41.4	41.4	27.062	0	25.101	539610000	38
ANXA5	Annexin A5	P08758	P08758		0.018359	-0.0639272	0.0698432	0.0308056	-0.00880127	-0.0788791	0.0214709	-0.0941871	0.0513475	-0.00205364	0.0245281	-0.126756	0.00982027	-0.021012	-0.0173097	-0.00555925	0.0538239	0.018608	0.0252765	0.0382332	20	20	20	58.1	58.1	58.1	35.936	0	154.7	3662200000	184
ANXA6	Annexin A6	P08133-2;P08133	P08133-2;P08133		0.0303515	-0.0127186	0.0203544	0.0398858	-0.00239534	-0.0521828	0.0667822	-0.0559855	0.011237	-0.0328277	-0.00036341	-0.0651725	0.00261726	-0.0095306	-0.0660602	0.0438995	0.0180755	0.0246591	-0.0215038	0.00450873	21	21	21	37.1	37.1	37.1	72.423	0	65.368	1048400000	74
ANXA7	Annexin A7	P20073-2;P20073	P20073-2;P20073		0.0555361	-0.0192142	0.0452972	0.0355918	0.0217268	0.00487065	-0.00291386	-0.0237319	0.0167415	-0.0576967	0.0540221	-0.0436877	0.0611623	-0.0803773	-0.00416833	0.0341181	-0.0348592	0.00939546	-0.0674324	-0.0607499	13	13	13	28.1	28.1	28.1	50.315	0	109.35	1098800000	63
AP1B1	AP-1 complex subunit beta-1	Q10567-3;Q10567-2;Q10567;Q10567-4	Q10567-3;Q10567-2;Q10567;Q10567-4		0.0761272	-0.0871641	0.0888379	0.0108761	0.0449672	-0.0302548	0.0661777	-0.0419245	0.0412236	-0.0014039	-0.0224199	-0.121734	0.00407944	-0.141869	-0.147819	-0.0370282	0.0307014	0.0408784	0.0776698	0.0937089	21	7	7	22.9	8.2	8.2	103.56	0	25.555	499490000	45
AP1G1	AP-1 complex subunit gamma-1	O43747;O43747-2	O43747;O43747-2		0.0764824	-0.0540578	-0.103282	-0.020642	0.0286207	0.0292664	-0.0208252	0.114823	0.0424391	-0.0113455	-0.161098	0.00658768	-0.011258	-0.185535	0.153276	0.0110054	0.0438264	0.0188471	0.0948282	-0.108329	12	12	12	14.7	14.7	14.7	91.35	0	96.03	1146200000	46
AP1M1	AP-1 complex subunit mu-1	Q9BXS5;Q9BXS5-2;Q9Y6Q5;Q9Y6Q5-2	Q9BXS5;Q9BXS5-2		0.0171439	-0.0893827	0.0486475	0.104875	0.0416442	0.065983	-0.0577768	-0.140693	0.0728471	-0.0069747	0.0638393	-0.0421189	-0.0902136	-0.123092	-0.0181482	0.0186104	0.0340656	0.0552652	-0.0751982	0.0643083	8	8	7	22.5	22.5	19.9	48.586	0	52.292	415620000	38
AP1S2	AP-1 complex subunit sigma-2	P56377;P56377-2	P56377;P56377-2		0.0700566	0.0444224	0.0585747	-0.0206336	-0.00959397	0.160137	-0.0251446	-0.184668	0.0300642	-0.0447956	0.0162808	-0.0712095	-0.0231561	-0.207521	0.0499474	0.0114906	0.0179999	-0.0603279	0.0329069	0.0988002	4	4	4	28	28	28	18.615	0	22.074	142750000	15
AP2A1	AP-2 complex subunit alpha-1	O95782-2;O95782;O94973-3	O95782-2;O95782		-0.00777367	-0.0266033	0.027428	0.0556416	0.0145913	-0.00840268	0.00843647	-0.100416	0.0170953	-0.00370359	0.0376635	-0.0632794	-0.023321	-0.0407349	-0.0218459	0.0195018	0.0313438	0.0247943	0.0285031	-0.0252878	16	16	9	18.2	18.2	11.2	105.36	0	35.329	485740000	45
AP2B1	AP-2 complex subunit beta	P63010;P63010-2;P63010-3	P63010;P63010-2;P63010-3		0.0557528	-0.0346168	0.0467267	0.0172659	0.0215315	-0.0600763	0.0110326	-0.0211142	0.0464516	-0.0370304	0.0353472	-0.0550852	-0.00637484	-0.011929	0.0162984	-0.00912733	0.00305048	0.00052648	-0.0428	-0.0321989	25	25	11	27.9	27.9	13.1	104.55	0	80.795	1950900000	118
AP2M1	AP-2 complex subunit mu	Q96CW1-2;Q96CW1	Q96CW1-2;Q96CW1		0.0187701	-0.0520511	0.0406455	0.0680285	0.000614353	0.00982404	0.00721064	-0.0833143	0.0011909	0.0161663	0.00227988	-0.0389715	0.0189441	-0.0414769	0.00752687	0.00669832	-0.0163255	0.0216292	-0.0512807	0.00752205	10	10	10	20.8	20.8	20.8	49.389	0	30.559	458830000	34
AP2S1	AP-2 complex subunit sigma	P53680;P53680-2	P53680;P53680-2		-0.203932	0.128615	-0.0707129	0.0788205	0.12404	-0.229323	0.0933258	0.0625924	-0.342395	0.184388	-0.250987	0.0551049	-0.0403089	0.221584	0.164522	0.0375433	-0.00965187	0.144271	-0.0682177	-0.135646	2	2	2	10.6	10.6	10.6	17.018	0.00087235	2.8674	75593000	4
AP3B1	AP-3 complex subunit beta-1	O00203-3;O00203;Q13367-3;Q13367;Q13367-4	O00203-3;O00203		0.077511	-0.00761992	0.00222482	0.0116205	0.00585613	-0.000581123	0.0657557	-0.02784	0.00373006	-0.0336018	-0.00253713	-0.080669	-0.0194276	0.00224668	-0.0378747	0.0636193	-0.0134832	-0.0373447	-0.0110824	-0.016872	19	19	19	19	19	19	116.19	0	46.487	712060000	55
AP3D1	AP-3 complex subunit delta-1	O14617-4;O14617;O14617-5;O14617-3;O14617-2	O14617-4;O14617;O14617-5;O14617-3;O14617-2		-0.0469688	0.0941089	0.0274855	-0.0517103	-0.0922956	-0.0130434	-0.0617955	0.100716	-0.0165132	0.0176195	-0.0496755	0.0208837	-0.0533284	0.0536405	-0.0468423	-0.000329494	-0.0237596	0.0578257	0.065014	-0.037401	11	11	11	13.1	13.1	13.1	114.71	0	30.295	349230000	31
AP3M1	AP-3 complex subunit mu-1	Q9Y2T2;P53677	Q9Y2T2		0.126408	-0.0812445	0.0322067	-0.502598	0.163679	-0.11143	0.193533	-0.137911	0.110422	0.0528947	0.0971946	-0.317514	0.035095	-0.423343	0.190458	0.179193	0.0806675	0.0241369	0.0818001	0.149983	4	4	4	10	10	10	46.939	0	6.3874	41290000	9
APEH	Acylamino-acid-releasing enzyme	P13798	P13798		0.0334012	-0.0427462	-0.010938	0.117062	-0.0604544	-0.0381393	-0.0293887	-0.0296302	0.130438	-0.0499321	-0.0158516	-0.100478	-0.0248326	-0.016856	-0.0515715	0.0380397	0.0204213	0.0259854	0.0304185	0.0186827	10	10	10	17.6	17.6	17.6	81.224	0	34.621	602920000	32
APEX1	DNA-(apurinic or apyrimidinic site) lyase;DNA-(apurinic or apyrimidinic site) lyase, mitochondrial	P27695	P27695		0.0458492	-0.116369	0.0655552	-0.0160401	-0.00642128	0.0236748	-0.0157169	-0.101362	0.0599169	-0.0284079	0.0744985	-0.0552234	0.0190171	-0.00225073	-0.0353621	0.0175327	0.00143054	-0.0191541	-0.000402451	0.0328656	15	15	15	46.9	46.9	46.9	35.554	0	148.1	1788600000	71
APH1A	Gamma-secretase subunit APH-1A	Q96BI3-2;Q96BI3	Q96BI3-2;Q96BI3		-0.16379	0.145946	-0.113867	-0.00984354	0.055098	0.0936074	-0.00946122	-0.0428162	-0.0271454	0.0911968	0.0303096	-0.495117	0.104264	-0.205181	0.203154	0.210708	-0.0636257	-0.0530853	0.0744215	0.118856	2	2	2	5.7	5.7	5.7	26.839	0	4.7063	20537000	2
API5	Apoptosis inhibitor 5	Q9BZZ5-2;Q9BZZ5;Q9BZZ5-5;Q9BZZ5-3;Q9BZZ5-6;Q9BZZ5-1	Q9BZZ5-2;Q9BZZ5;Q9BZZ5-5;Q9BZZ5-3;Q9BZZ5-6;Q9BZZ5-1		-0.012119	-0.130497	-0.0127757	-0.0783855	0.0337855	-0.0748532	-0.0136798	-0.0637918	0.0876687	0.0202485	0.0745158	-0.0242155	-0.0199663	0.0365008	0.0830367	0.0167413	0.0242939	0.0122236	-0.0119409	-0.00315928	14	14	14	31	31	31	56.769	0	66.849	716520000	70
APIP	Methylthioribulose-1-phosphate dehydratase	Q96GX9;Q96GX9-3	Q96GX9;Q96GX9-3		-0.177948	0.00353092	-0.125349	0.101035	0.0625812	0.153402	0.0872562	0.0982614	-0.32824	-0.0229191	-0.109407	0.079118	-0.0943305	0.320543	0.00344598	0.0881306	0.0398659	0.0208004	-0.117609	-0.138537	2	2	2	10.3	10.3	10.3	27.125	0	7.3558	78871000	7
APMAP	Adipocyte plasma membrane-associated protein	Q9HDC9-2;Q9HDC9	Q9HDC9-2;Q9HDC9		0.0971549	-0.068532	0.0278976	0.0424747	0.0518119	-0.00997472	0.0223882	-0.113988	0.0734837	-0.0248584	0.0487247	-0.0745742	-0.0302708	-0.208035	-0.0628525	0.0235849	0.0588512	0.0376543	0.0250446	0.0276454	12	12	12	30.4	30.4	30.4	32.161	0	46.595	627120000	46
APOA1BP	NAD(P)H-hydrate epimerase	Q8NCW5-2;Q8NCW5	Q8NCW5-2;Q8NCW5		-0.00937286	-0.117789	-0.00452691	-0.0384433	0.0459082	0.0150979	-0.00371724	-0.0415211	0.0679405	-0.00679245	-0.0227376	0.023545	0.039285	-0.0748727	-0.029401	0.0355539	0.0111918	0.00668893	0.0534426	-0.00584912	9	9	9	56.2	56.2	56.2	20.43	0	28.222	538740000	65
APOO	Apolipoprotein O	Q9BUR5-2;Q9BUR5	Q9BUR5-2;Q9BUR5		0.0589716	-0.209107	0.127268	0.0596602	0.200367	0.0769059	-0.0861444	-0.0521013	0.0885088	0.0124416	0.00978929	-0.0228075	-0.0446027	-0.235059	-0.161733	0.0336389	0.0337714	-0.00491213	-0.0155549	0.07433	4	4	4	23.3	23.3	23.3	20.199	0	10.008	96309000	11
APP	Amyloid beta A4 protein;N-APP;Soluble APP-alpha;Soluble APP-beta;C99;Beta-amyloid protein 42;Beta-amyloid protein 40;C83;P3(42);P3(40);C80;Gamma-secretase C-terminal fragment 59;Gamma-secretase C-terminal fragment 57;Gamma-secretase C-terminal fragment 50;C31	P05067-7;P05067-11;P05067-8;P05067-9;P05067;P05067-10;P05067-3;P05067-4;P05067-5;P05067-6	P05067-7;P05067-11;P05067-8;P05067-9;P05067;P05067-10;P05067-3;P05067-4;P05067-5;P05067-6		-0.1387	0.00321096	-0.230224	-0.368114	-0.0375255	0.0434129	-0.056991	0.330793	-0.0450284	0.094307	-0.126463	0.28878	-0.0367605	0.0620907	-0.153826	0.228143	0.0625686	-0.0302903	0.0128117	0.0414344	5	5	5	6.7	6.7	6.7	82.915	0	10.38	149210000	10
APPL1	DCC-interacting protein 13-alpha	Q9UKG1	Q9UKG1		0.0611853	-0.0633602	-0.815963	-0.884265	0.0390537	0.12253	-0.191681	-0.315417	-0.080547	0.124914	1.1969	-0.578476	0.0686158	-0.541958	0.262282	-0.0219513	0.0929728	0.153879	0.459054	0.855857	2	2	2	3	3	3	79.663	0.002686	2.1162	18676000	3
APRT	Adenine phosphoribosyltransferase	P07741;P07741-2	P07741;P07741-2		0.0483493	-0.0242295	0.0184899	-0.0258673	-0.0163266	0.00930247	0.0509015	0.0368193	0.0149144	-0.0450633	-0.0400545	0.0270239	-0.0149151	0.0116486	0.0530621	-0.0197078	-0.0144086	0.00801369	-0.0870337	-0.0472883	10	10	10	57.8	57.8	57.8	19.608	0	157.5	1840300000	84
AQR	Intron-binding protein aquarius	O60306	O60306		0.00730726	0.0769243	0.291433	-0.0974877	-0.068932	0.0695521	-0.0471891	-0.296305	-0.119311	0.105042	0.0588277	-0.222287	-0.0717042	-0.0573084	0.255933	-0.109572	0.0744971	-0.0387819	0.00415611	0.128837	3	3	3	2.4	2.4	2.4	171.29	0	5.7262	41904000	6
ARCN1	Coatomer subunit delta	P48444;P48444-2	P48444;P48444-2		0.0457767	-0.0707179	0.00110063	0.027014	0.036782	0.00784755	-0.00213423	-0.0319998	0.00972676	-0.0328444	-0.0116484	-0.024217	-0.0359585	-0.0122225	-0.0263408	0.0133313	0.0136833	0.0152124	0.0306859	-0.0094465	21	21	21	38.4	38.4	38.4	57.21	0	70.337	1490000000	102
ARF1;ARF3	ADP-ribosylation factor 1;ADP-ribosylation factor 3	P84077;P61204;P61204-2	P84077;P61204;P61204-2		0.0332039	-0.199457	-0.0519438	0.0745488	-0.0191868	0.0459168	-0.000385284	-0.101256	0.191572	0.0347563	0.155107	-0.172873	0.00761919	-0.235027	-0.143256	-0.00753994	0.121937	-0.00404944	0.0684895	0.145453	10	10	5	60.2	60.2	31.5	20.697	0	59.176	988080000	102
ARF4	ADP-ribosylation factor 4	P18085	P18085		0.0879129	-0.540857	-0.138759	-0.013244	0.18925	0.136804	0.0701785	-0.00370866	0.15425	-0.0453147	0.0723173	-0.290253	-0.0174391	-0.224737	-0.0639333	-0.0419232	0.147848	0.0895685	0.154498	0.221172	7	3	3	47.8	18.9	18.9	20.511	0	6.2813	70821000	15
ARF5	ADP-ribosylation factor 5	P84085	P84085		0.0795916	-0.1616	0.052146	-0.0557193	0.0576584	0.0165265	0.0174847	-0.038132	0.0543048	0.0104309	0.000553787	-0.0645175	0.0636943	-0.11148	-0.0681757	-0.00695439	-0.0673595	0.0355185	0.122985	0.00667429	8	3	3	51.7	17.2	17.2	20.529	0	8.666	380200000	14
ARFGAP2	ADP-ribosylation factor GTPase-activating protein 2	Q8N6H7-2;Q8N6H7;Q8N6H7-3	Q8N6H7-2;Q8N6H7;Q8N6H7-3		-0.00313613	-0.0628441	-0.0550394	0.00970755	-0.0165053	-0.0237628	0.0459585	0.0900809	-0.0670199	-0.057801	-0.0220817	-0.0118318	0.0766096	0.134862	-0.00797981	-0.0406067	-0.0170477	0.0139308	-0.0150076	-0.026855	8	8	8	22.2	22.2	22.2	44.542	0	19.339	205510000	19
ARFGAP3	ADP-ribosylation factor GTPase-activating protein 3	Q9NP61-2;Q9NP61	Q9NP61-2;Q9NP61		-0.0105325	0.138165	-0.0828101	-0.0602489	-0.0717867	-0.00685096	0.120354	0.0817442	-0.0546992	-0.107858	-0.108691	0.122112	0.0620683	0.0465091	0.0858964	0.128526	-0.0332408	0.0155114	-0.153945	-0.166592	2	2	2	5.9	5.9	5.9	51.989	0	6.475	107160000	7
ARFIP1	Arfaptin-1	P53367-2;P53367;P53367-3	P53367-2;P53367;P53367-3		-0.148857	0.268538	0.365415	-0.166114	-0.0753054	0.0332734	-0.132735	-0.0845643	-0.106333	0.0645971	-0.0556784	-0.225785	-0.399929	0.313369	0.13579	0.215714	-0.0559017	0.0838349	0.0431133	-0.128811	4	4	4	10.9	10.9	10.9	38.598	0	5.2692	72659000	4
ARGLU1	Arginine and glutamate-rich protein 1	Q9NWB6;Q9NWB6-3;Q9NWB6-2	Q9NWB6;Q9NWB6-3;Q9NWB6-2		-0.161728	-0.133065	-0.0492207	-0.00908518	0.0266801	0.162491	0.0376553	-0.173145	-0.119992	-0.144007	-0.199785	0.130084	0.0618755	0.117684	0.226482	-0.0639685	0.0728725	0.0944755	0.0711592	-0.00383097	2	2	2	5.5	5.5	5.5	33.216	0.0016887	2.5253	45872000	3
ARHGAP1	Rho GTPase-activating protein 1	Q07960	Q07960		0.0156479	-0.0108255	-0.03136	-0.0486996	-0.0255552	0.0284791	0.0304171	0.0367045	0.00345707	-0.0399916	-0.106082	0.0608646	-0.00764036	-0.0435757	0.11108	0.0144639	0.0425726	0.0147172	-0.0146255	-0.0864179	7	7	7	17.3	17.3	17.3	50.435	0	12.53	255850000	18
ARHGAP17	Rho GTPase-activating protein 17	Q68EM7-2;Q68EM7-6;Q68EM7-5;Q68EM7;Q68EM7-3;Q68EM7-4;Q68EM7-7;Q17R89-2;Q17R89-3;Q17R89	Q68EM7-2;Q68EM7-6;Q68EM7-5;Q68EM7;Q68EM7-3		-0.022445	0.0403199	-0.137372	0.0566845	-0.0310267	-0.0482462	0.101143	-0.0597414	0.00975394	0.0333066	0.0885979	-0.0759026	-0.0806301	0.0285543	0.00123739	0.0572164	-0.0323102	0.0800092	-0.0706851	0.00516742	4	4	4	4.6	4.6	4.6	87.608	0	8.947	128610000	13
ARHGAP35	Rho GTPase-activating protein 35	Q9NRY4	Q9NRY4		-0.030117	0.24151	-0.00736104	-0.335161	0.0837587	0.0814251	0.0436091	-0.459653	-0.100516	-0.0403292	0.511943	-0.159974	-0.0313306	-0.114302	0.288093	-0.0926045	0.121913	-0.234726	-0.167252	0.344705	4	4	4	2.9	2.9	2.9	170.51	0	7.1278	29649000	5
ARHGDIA	Rho GDP-dissociation inhibitor 1	P52565;P52565-2	P52565;P52565-2		-0.000265688	0.0806084	0.0103885	-0.0130451	-0.00281162	0.0396574	0.0428878	0.0821369	-0.0690609	-0.0180595	-0.0769379	0.165361	0.0360507	0.0737037	0.0231425	-0.00382624	-0.132733	-0.0298038	-0.108399	-0.155363	11	11	11	58.8	58.8	58.8	23.207	0	245.33	5934200000	105
ARHGEF1	Rho guanine nucleotide exchange factor 1	Q92888-3;Q92888;Q92888-2;Q92888-4	Q92888-3;Q92888;Q92888-2;Q92888-4		0.0590197	-0.0857484	0.0392377	0.0717905	0.0809584	0.0124693	0.0131986	-0.177139	0.0780283	-0.018478	-0.00642735	-0.0586965	0.0310393	-0.120269	-0.0300347	0.0234647	0.0176537	-0.0773881	0.0520783	0.038873	16	16	16	21.1	21.1	21.1	104.06	0	44.489	382250000	42
ARHGEF18	Rho guanine nucleotide exchange factor 18	Q6ZSZ5-2;Q6ZSZ5-1;Q6ZSZ5-6;Q6ZSZ5-5;Q6ZSZ5	Q6ZSZ5-2;Q6ZSZ5-1;Q6ZSZ5-6;Q6ZSZ5-5;Q6ZSZ5		-0.0218603	0.222219	0.13756	0.091262	-0.0420998	-0.0247362	-0.075489	-0.0985788	-0.101712	-0.0257029	-0.00810844	-0.0741487	-0.129316	0.196535	-0.114334	-0.194452	-0.200057	0.104015	0.327231	-0.0245967	2	2	2	1.6	1.6	1.6	114.08	0.00059737	3.1702	35270000	3
ARHGEF2	Rho guanine nucleotide exchange factor 2	Q92974-3;Q92974-2;Q92974	Q92974-3;Q92974-2;Q92974		-0.0425031	0.0349759	-0.0449921	-0.0681329	0.00555859	-0.0433801	0.0236191	0.065179	-0.0296609	-0.0592537	0.0342847	0.0840711	-0.00216417	0.153835	0.0790977	0.00986786	-0.0348589	-0.00526308	-0.12469	-0.0919591	11	11	11	13.6	13.6	13.6	108.24	0	15.569	291130000	27
ARHGEF5	Rho guanine nucleotide exchange factor 5	Q12774;A5YM69;Q12774-2	Q12774		-0.107964	0.56394	-0.12777	-0.744217	-0.456817	-0.0312259	0.241136	0.486921	-0.138847	0.372888	-0.0860466	0.664132	-0.400238	-0.420788	0.12867	-0.273304	0.119784	0.476553	-0.254548	-0.0686288	3	3	3	2.4	2.4	2.4	176.8	0	5.6676	11865000	4
ARID1A	AT-rich interactive domain-containing protein 1A	O14497;O14497-2;O14497-3	O14497;O14497-2;O14497-3		-0.144242	0.110415	0.0161487	-0.357172	-0.113927	0.102942	-0.0538424	0.170104	-0.0616705	0.0492912	-0.0424061	0.153842	-0.122056	0.136612	-0.258832	0.0661221	0.02037	-0.000449322	0.00246678	0.269914	7	7	7	5.1	5.1	5.1	242.04	0	29.165	244500000	16
ARIH1	E3 ubiquitin-protein ligase ARIH1	Q9Y4X5	Q9Y4X5		0.143181	-0.350685	0.0965051	-0.0944958	0.125409	-0.0166358	0.100907	0.0280634	0.0275322	0.137514	-0.0524668	-0.162327	0.0688964	-0.255765	0.117902	0.00216265	-0.00141975	0.099259	-0.0298268	-0.0400787	9	9	9	19.7	19.7	19.7	64.117	0	21.723	176630000	17
ARL1	ADP-ribosylation factor-like protein 1	P40616-2;P40616	P40616-2;P40616		0.0933797	0.0588555	0.0769899	0.101536	0.113719	-0.140158	-0.110045	-0.0859027	0.0704429	-0.017056	0.0258737	-0.406238	-0.0437181	-0.359024	-0.127719	0.0164267	0.146241	0.0546033	0.265904	0.20952	2	2	2	12.2	12.2	12.2	18.565	0	5.243	36007000	9
ARL2	ADP-ribosylation factor-like protein 2	P36404;P36404-2	P36404		0.0174212	0.0404807	-0.0101764	0.139319	0.108009	0.0451935	0.0109494	-0.0199528	0.0366939	-0.0344446	0.0242014	-0.125851	0.0243835	-0.329704	-0.142176	0.0453435	0.0348215	0.0344309	0.0932233	-0.0485355	5	5	5	28.3	28.3	28.3	20.878	0	11.815	87003000	16
ARL2BP	ADP-ribosylation factor-like protein 2-binding protein	Q9Y2Y0-2;Q9Y2Y0	Q9Y2Y0-2;Q9Y2Y0		-0.167183	0.118403	-0.106117	-0.0943445	-0.35383	0.356397	-0.40087	-0.29044	-0.240948	0.0513948	0.0863106	0.234069	-0.00723066	0.157634	-0.0532159	0.220481	0.120796	-0.0581459	0.107163	0.263309	2	2	2	8.6	8.6	8.6	17.711	0	5.7018	60442000	7
ARL3	ADP-ribosylation factor-like protein 3	P36405	P36405		0.0133678	-0.0753805	-0.0221248	0.0407587	-0.0314374	-0.0202765	-0.129046	0.00808352	0.0332614	-0.0867902	0.0879166	-0.093216	0.0594192	0.00251263	-0.0130443	-0.0382173	0.00942019	0.0731889	0.048416	0.0768185	6	6	6	36.3	36.3	36.3	20.455	0	11.867	219840000	21
ARL6IP1	ADP-ribosylation factor-like protein 6-interacting protein 1	Q15041-2;Q15041;Q15041-3	Q15041-2;Q15041;Q15041-3		0.109072	-0.0289431	0.119435	0.000475988	-0.0513653	0.0328261	0.0499811	-0.111212	0.0591681	-0.0461874	0.077748	0.0220342	-0.0503953	-0.0496275	-0.00601047	0.0546244	-0.0531398	0.0558779	-0.140639	-0.100092	2	2	2	10.3	10.3	10.3	20.26	0	7.4286	529550000	11
ARL6IP4	ADP-ribosylation factor-like protein 6-interacting protein 4	Q66PJ3-7;Q66PJ3-4;Q66PJ3-3;Q66PJ3-2;Q66PJ3;Q66PJ3-5	Q66PJ3-7;Q66PJ3-4;Q66PJ3-3;Q66PJ3-2;Q66PJ3;Q66PJ3-5		-0.17882	0.18544	-0.130999	-0.0984326	-0.00802927	-0.00481153	0.229063	0.0198855	-0.189648	0.220518	-0.244321	0.114202	0.062289	0.0611466	0.0621389	0.0932251	-0.0765372	-0.0942618	-0.0135696	-0.0648467	4	4	4	16.4	16.4	16.4	25.348	0	14.654	148430000	11
ARL6IP5	PRA1 family protein 3	O75915	O75915		0.0438598	-0.162151	0.0393715	0.040742	0.000931449	0.0175092	-0.0848846	-0.136339	0.0465567	-0.0120057	0.251681	-0.152989	0.0175512	-0.172111	-0.267827	0.05665	0.187141	0.0100034	0.0914911	0.12845	3	3	3	14.4	14.4	14.4	21.614	0	6.8429	88025000	17
ARL6IP6	ADP-ribosylation factor-like protein 6-interacting protein 6	Q8N6S5	Q8N6S5		0.298083	-0.28357	-0.154875	0.0657773	0.320124	0.189907	-0.364638	0.059064	-0.12629	-0.180596	0.0760928	0.236161	0.174973	-0.330474	0.284347	0.0230772	-0.354947	0.270078	-0.356112	0.0974511	2	2	2	8.8	8.8	8.8	24.676	0	4.0672	23118000	4
ARL8A	ADP-ribosylation factor-like protein 8A	Q96BM9	Q96BM9		0.106069	-0.0167145	0.153464	-0.0706429	0.0909007	0.101954	0.0268091	-0.0571631	-0.0592853	-0.0554927	-0.0233382	-0.0352355	0.0109133	-0.051703	0.0719748	-0.0219505	-0.0636534	-0.085702	-0.08416	0.00658792	3	3	2	17.2	17.2	12.4	21.416	0	5.6063	122160000	10
ARMC6	Armadillo repeat-containing protein 6	Q6NXE6-2;Q6NXE6	Q6NXE6-2;Q6NXE6		0.0461737	0.100765	0.0382073	-0.104928	0.0159998	-0.0114412	0.0614388	-0.0462523	-0.00550497	-0.06947	-0.040885	0.158363	0.0349523	-0.0914982	0.042735	0.0122252	-0.0286491	-0.0140413	-0.0540288	-0.100531	6	6	6	15.5	15.5	15.5	51.547	0	18.927	235440000	18
ARMT1	Protein-glutamate O-methyltransferase	Q9H993	Q9H993		0.0778145	-0.411427	-0.0232685	-0.0258405	0.108259	0.0719698	-0.015333	-0.168568	-0.0467097	-0.0901564	0.0916147	0.0523793	-0.0568458	0.227858	-0.143569	0.110676	0.0904541	0.00606867	0.0297514	0.0585029	5	5	5	11.6	11.6	11.6	51.172	0	9.0466	121080000	14
ARPC1A	Actin-related protein 2/3 complex subunit 1A	Q92747;Q92747-2	Q92747;Q92747-2		0.0888168	-0.00485533	0.02703	-0.0329865	-0.0119004	-0.0368533	-0.0321693	-0.0758584	0.019642	-0.027114	0.0216901	-0.0615144	-0.0208	-0.115204	0.000849307	-0.0201151	0.0220058	0.0635482	0.0435003	0.0959191	12	12	12	33.2	33.2	33.2	41.569	0	26.502	631120000	36
ARPC1B	Actin-related protein 2/3 complex subunit 1B	O15143	O15143		0.0313309	-0.0449014	-0.00226021	0.0288936	-0.00728684	-0.0474699	0.0335808	-0.00984889	0.0556295	-0.0210127	-0.0745605	-0.0439858	0.000726029	-0.0585067	0.0307146	-0.00128289	0.00319335	0.0655831	0.0182327	-0.0131383	10	10	10	32.8	32.8	32.8	40.949	0	48.847	741120000	26
ARPC2	Actin-related protein 2/3 complex subunit 2	O15144	O15144		0.054568	-0.080546	-0.0328739	0.00674467	0.00085745	-0.0230006	0.0490381	-0.0552512	0.00429511	-0.0186782	-0.0334054	-0.0628426	0.0401709	-0.0237767	0.0370424	0.0285721	0.0096229	0.0137727	0.0205637	0.00875735	9	9	9	31.3	31.3	31.3	34.333	0	42.103	599720000	30
ARPC3	Actin-related protein 2/3 complex subunit 3	O15145	O15145		0.00136742	0.163444	0.0260031	0.0777896	0.0456869	0.0133116	0.0506565	-0.0805398	-0.0532925	-0.0174097	-0.0168524	-0.010218	-0.0105779	-0.0587985	0.00211221	-0.0394526	-0.0900998	-0.0163461	0.00875148	-0.0519049	6	6	6	29.8	29.8	29.8	20.546	0	11.437	520320000	26
ARPC4	Actin-related protein 2/3 complex subunit 4	P59998;P59998-3;P59998-2;P59998-4	P59998;P59998-3;P59998-2;P59998-4		0.0478581	0.0170273	-0.00874396	-0.00228557	0.0207312	-0.0167072	-0.0191219	-0.0810194	0.0533493	-0.0535492	-0.00987911	-0.0503952	-0.0389611	-0.0709092	-0.0652744	0.0746337	0.00838897	0.0100573	0.100534	0.0278967	4	4	4	21.4	21.4	21.4	19.667	0	9.8791	610390000	35
ARPC5	Actin-related protein 2/3 complex subunit 5	O15511;O15511-2	O15511;O15511-2		-0.0247553	0.0795324	0.00894241	0.0390739	0.0223145	0.00816302	-0.00649282	-0.0483623	-0.0810517	0.0545272	-0.042028	0.00308064	-0.0139469	0.00772446	-0.00334322	0.0512968	-0.0362665	-0.0389555	0.00478573	-0.0406081	4	4	4	29.8	29.8	29.8	16.32	0	33.694	355940000	20
ARPC5L	Actin-related protein 2/3 complex subunit 5-like protein	Q9BPX5	Q9BPX5		-0.0344916	0.198764	0.202699	-0.155782	-0.0534541	-0.160422	0.0557581	-0.251877	-0.0519239	0.125062	0.00759536	-0.0424174	0.028005	-0.0304409	0.102695	-0.110691	-0.0457711	0.00195786	0.0796175	0.0787469	2	2	2	20.3	20.3	20.3	16.941	0	12.509	43645000	4
ARPIN	Arpin	Q7Z6K5	Q7Z6K5		-0.0834137	0.187625	-0.0120263	-0.0196756	0.0186736	0.132049	0.0986905	0.138693	-0.159049	0.0319825	-0.157325	0.262647	0.0515049	0.0158861	0.0162087	-0.0534589	-0.14377	-0.0742031	-0.0641004	-0.243308	8	8	1	33.6	33.6	5.8	24.943	0	15.49	369000000	24
ARPP19	cAMP-regulated phosphoprotein 19	P56211;P56211-2	P56211;P56211-2		-0.0106958	0.428801	0.0581088	-0.0011629	-0.16023	-0.00431724	0.00066328	0.0748293	-0.2731	0.0537743	-0.186687	0.236818	-0.121667	0.112574	0.0134345	-0.05179	0.0467017	-0.0945552	-0.112673	-0.065196	5	4	4	58.9	49.1	49.1	12.323	0	45.516	267320000	15
ASCC2	Activating signal cointegrator 1 complex subunit 2	Q9H1I8;Q9H1I8-3	Q9H1I8;Q9H1I8-3		-0.0765813	0.0348762	0.0987541	0.0296138	-0.107402	-0.0937576	-0.0215548	0.13773	0.0342795	0.042313	-0.00952822	-0.100549	0.110418	-0.0194634	-0.0110857	0.0578995	0.0247205	0.0278822	-0.0718731	-0.143061	2	2	2	2.2	2.2	2.2	86.359	0.0017075	2.6344	41063000	5
ASCC3	Activating signal cointegrator 1 complex subunit 3	Q8N3C0;Q8N3C0-3;Q8N3C0-4	Q8N3C0;Q8N3C0-3;Q8N3C0-4		-0.00530156	-0.0148672	0.25292	0.28502	0.0196946	-0.0669734	0.35569	-0.722775	-0.00702584	0.0491864	-0.114372	0.383726	-0.0915295	0.098865	-0.709446	0.204324	0.115675	-0.120439	-0.0755442	0.106801	2	2	2	0.9	0.9	0.9	251.46	0	3.9292	31098000	3
ASNA1	ATPase ASNA1	O43681	O43681		0.0935018	-0.0335661	0.134316	0.0273225	-0.0683125	0.0593683	-0.0502895	-0.143982	0.0531356	-0.099647	0.00862342	-0.155375	-0.0136602	0.0185569	0.052067	0.0571674	0.0418514	-0.0739424	-0.0150795	0.0515748	8	8	8	25.6	25.6	25.6	38.792	0	18.077	252650000	20
ASNS	Asparagine synthetase [glutamine-hydrolyzing]	P08243-2;P08243;P08243-3	P08243-2;P08243;P08243-3		0.0356053	-0.0830131	0.087038	-0.0152369	0.0226223	-0.0691059	0.0468129	-0.126882	-0.0034163	-0.00449695	0.0211712	-0.0668961	0.00381784	-0.00173157	-0.0559936	0.0101478	0.0188908	0.058113	0.0286162	0.0375675	14	14	14	28.3	28.3	28.3	62.168	0	46.014	729080000	51
ASNSD1		L0R819	L0R819		0.119043	0.035579	-0.185572	0.214177	0.123045	0.158773	-0.398294	0.302731	0.0057646	0.376974	0.159101	0.0123286	0.0876876	-1.1184	-0.0167012	-0.197251	0.212046	-0.0232261	-0.14896	0.224783	4	4	4	43.8	43.8	43.8	11.25	0	8.1907	24318000	7
ASPH	Aspartyl/asparaginyl beta-hydroxylase	Q12797-10;Q12797;Q12797-7;Q12797-4;Q12797-3;Q12797-9;Q12797-6;Q12797-11;Q12797-5;Q12797-8;Q12797-2	Q12797-10;Q12797		0.142231	-0.197094	0.0544156	0.264888	0.0148273	0.157281	0.188319	0.108316	0.220118	-0.0297832	-0.1224	-0.203333	-0.080498	-0.691425	-0.227615	-0.259207	0.360493	0.081136	0.117359	0.0456012	7	7	7	11	11	11	83.267	0	10.464	60256000	13
ASPSCR1	Tether containing UBX domain for GLUT4	Q9BZE9;Q9BZE9-2;Q9BZE9-3;Q9BZE9-4	Q9BZE9;Q9BZE9-2;Q9BZE9-3;Q9BZE9-4		0.044324	-0.0717128	0.114422	-0.0404058	-0.0170198	0.156331	-0.0132262	0.082468	0.0891743	-0.123498	0.172893	-0.169241	0.101184	-0.215864	-0.0421993	-0.0809678	0.061835	-0.0474681	-0.125782	0.068385	9	9	9	27.8	27.8	27.8	60.182	0	53.075	236950000	18
ASS1	Argininosuccinate synthase	P00966	P00966		-0.150432	0.630627	0.10557	-0.0335795	-0.00534219	-0.0539881	0.0461361	0.158214	-0.520233	-0.0268004	-0.304208	0.220454	-0.0744701	0.292375	-0.0623104	0.0176735	-0.207609	0.0931577	0.0647789	-0.246384	4	4	4	11.9	11.9	11.9	46.53	0	7.0008	83276000	7
ASUN	Protein asunder homolog	Q9NVM9-2;Q9NVM9	Q9NVM9-2;Q9NVM9		-0.316031	0.0110521	-0.148511	-0.0950726	0.157964	-0.100171	-0.176581	-0.137368	0.253983	0.212559	-0.0851814	0.0918728	-0.00275441	0.343603	-0.00157291	0.0744113	-0.0809717	-0.501947	0.151771	0.292577	2	2	2	3.5	3.5	3.5	68.494	0.0017045	2.6169	21117000	2
ATAD1	ATPase family AAA domain-containing protein 1	Q8NBU5;Q8NBU5-2	Q8NBU5;Q8NBU5-2		0.00498185	-0.0728965	0.110555	0.0565488	0.097687	-0.0368917	-0.0586781	-0.152878	0.00571418	-0.0838093	0.0232156	-0.139085	0.0183509	0.0164035	-0.0158127	-0.0289436	0.00858352	0.019162	0.122073	0.0493499	6	6	6	22.4	22.4	22.4	40.744	0	40.598	314680000	16
ATAD3A	ATPase family AAA domain-containing protein 3A	Q9NVI7-2;Q9NVI7;Q9NVI7-3	Q9NVI7-2;Q9NVI7;Q9NVI7-3		-0.02234	-0.0470663	-0.0138198	-0.025733	-0.0142086	-0.0641334	-0.0156394	0.0310236	-0.06407	0.0273024	-0.048736	0.0296873	-0.0116813	0.155807	0.00894785	-0.00234823	-0.00684884	0.0245245	0.0464414	-0.0434785	25	25	6	43.7	43.7	12.1	66.217	0	72.547	2251100000	125
ATG3	Ubiquitin-like-conjugating enzyme ATG3	Q9NT62-2;Q9NT62	Q9NT62-2;Q9NT62		-0.0222982	0.0409358	0.198668	0.0740734	0.221128	0.19849	-0.422159	0.164276	-0.0553678	0.106409	0.0555374	-0.0281506	0.140165	-0.54547	0.320507	-0.208479	0.0573151	-0.164023	-0.0241405	-0.163789	2	2	2	7.1	7.1	7.1	35.467	0	6.1186	36552000	7
ATG4B	Cysteine protease ATG4B	Q9Y4P1-4;Q9Y4P1-6;Q9Y4P1;Q9Y4P1-2;Q9Y4P1-3	Q9Y4P1-4;Q9Y4P1-6;Q9Y4P1;Q9Y4P1-2;Q9Y4P1-3		-0.0242266	0.186015	0.465946	-0.497405	0.0687789	-0.0183793	0.025837	-0.11089	-0.124099	-0.0189254	0.227214	0.0868069	0.138864	0.125979	-0.438169	0.0993365	-0.437872	0.0811515	0.0664392	0.0412289	3	3	3	13.9	13.9	13.9	37.037	0	8.81	29411000	5
ATG7	Ubiquitin-like modifier-activating enzyme ATG7	O95352-3;O95352-2;O95352	O95352-3;O95352-2;O95352		0.227329	0.193846	0.271105	0.733288	0.0319567	-0.247589	-0.336424	-0.823127	0.270136	-0.12189	0.325968	-1.24685	0.0192815	-0.729813	-0.438779	0.508627	0.0994551	0.234573	0.404111	0.56843	2	2	2	3.4	3.4	3.4	68.617	0.00030798	3.4689	18898000	3
ATIC	Bifunctional purine biosynthesis protein PURH;Phosphoribosylaminoimidazolecarboxamide formyltransferase;IMP cyclohydrolase	P31939;P31939-2	P31939;P31939-2		0.0658425	-0.0318493	0.0328338	0.03069	0.00283175	-0.020064	-0.0180123	-0.124929	0.0300101	-0.0780499	0.012423	-0.013665	0.00185146	-0.0194717	-0.02058	0.0439277	0.0141607	0.0120239	-0.00806513	0.0317223	22	22	22	45.3	45.3	45.3	64.615	0	152.23	2313200000	135
ATL2	Atlastin-2	Q8NHH9-3;Q8NHH9-5;Q8NHH9;Q8NHH9-4;Q8NHH9-2	Q8NHH9-3;Q8NHH9-5;Q8NHH9;Q8NHH9-4;Q8NHH9-2		-0.0524018	0.196948	0.0661326	0.0491011	-0.105223	0.0133869	-0.135608	0.0941218	-0.114634	-0.012857	-0.154231	0.135975	0.127825	0.0765708	0.0290162	-0.0766126	-0.109646	-0.0426838	0.021544	-0.0630945	2	2	2	5.3	5.3	5.3	46.917	0	4.7184	334250000	5
ATOX1	Copper transport protein ATOX1	O00244	O00244		-0.179211	0.228329	-0.171267	-0.0456699	0.0190752	0.14984	0.0907598	0.218436	-0.155532	0.108741	-0.177694	0.206174	0.0291957	0.0429992	0.0912076	0.0487206	-0.179832	-0.0863185	-0.124511	-0.169811	2	2	2	25	25	25	7.4016	0	4.6277	212330000	13
ATP13A1	Manganese-transporting ATPase 13A1	Q9HD20;Q9HD20-2;Q9HD20-3	Q9HD20;Q9HD20-2		0.0136565	-0.0143437	0.0458458	0.0454387	-0.0352218	0.0931524	-0.124483	0.0700097	0.0720223	0.0236079	0.0836091	-0.176984	-0.0906034	-0.0144048	0.000646949	0.0645853	-0.0583605	-0.0122195	-0.0172174	-0.0251061	12	12	12	11	11	11	132.95	0	32.135	251540000	27
ATP1A1	Sodium/potassium-transporting ATPase subunit alpha-1	P05023-4;P05023;P05023-3;P05023-2;P13637;P13637-2;P13637-3;P50993;Q13733;P20648	P05023-4;P05023;P05023-3;P05023-2		0.0348007	-0.0580636	0.0396708	0.0402069	0.0222126	-0.015261	-0.0226251	-0.00458181	0.0153201	-0.0285997	0.0181042	-0.0458103	-0.030144	0.00136167	-0.0391927	0.0203502	0.0120514	0.0236075	-0.0183827	-0.0213943	34	34	30	35.4	35.4	31.7	113	0	270.92	3885500000	218
ATP1B1	Sodium/potassium-transporting ATPase subunit beta-1	P05026-2;P05026	P05026-2;P05026		0.0279131	-0.115741	0.0297992	-0.132747	-0.00651894	0.414586	0.0307071	0.0561098	-0.00242996	-0.0464146	-0.00460964	-0.0423391	-0.0254903	-0.117422	0.0200761	-0.00797796	-0.0905527	-0.0606441	0.0169421	0.000384569	8	8	8	30.6	30.6	30.6	34.893	0	20.916	315020000	22
ATP1B3	Sodium/potassium-transporting ATPase subunit beta-3	P54709;P54709-2	P54709		0.0281978	-0.133599	0.0243577	0.0500851	0.042592	0.0217256	-0.0124637	-0.074036	0.0608687	-0.109152	0.0260378	0.0389685	-0.0249147	0.0426684	-0.0793586	-0.0390485	0.00643554	0.0424629	0.0380366	-0.00623375	5	5	5	19.4	19.4	19.4	31.512	0	15.494	382060000	20
ATP2A2	Sarcoplasmic/endoplasmic reticulum calcium ATPase 2	P16615;P16615-4;P16615-5;P16615-2;P16615-3;O14983-2;O14983;O14983-3;Q93084-4;Q93084-2;Q93084-3;Q93084-7;Q93084;Q93084-6;Q93084-5	P16615;P16615-4;P16615-5;P16615-2;P16615-3		0.0177292	-0.0202417	0.0248891	0.0718557	-0.00118751	-0.0356647	-0.0141563	-0.0364324	-0.00136817	-0.00571995	0.0459841	-0.0249018	-0.015916	0.0245427	-0.0384925	-0.01748	0.00334743	0.011764	-0.0192275	-0.0256933	23	23	23	24.1	24.1	24.1	114.76	0	135.24	2472700000	140
ATP2B1	Plasma membrane calcium-transporting ATPase 1	P20020-5;P20020-2;P20020-6;P20020;P20020-4;P20020-1	P20020-5;P20020-2;P20020-6;P20020;P20020-4;P20020-1		0.0230353	-0.0573807	-0.00875674	0.132852	0.0357176	-0.0787424	-0.160955	0.021175	0.0447953	-0.0681801	0.00871241	-0.0784727	0.00815554	0.023465	-0.129106	-0.030041	0.0180825	0.0283377	0.10379	0.107148	10	10	5	11.2	11.2	5.7	129.15	0	27.8	168370000	23
ATP5A1	ATP synthase subunit alpha, mitochondrial	P25705;P25705-2;P25705-3	P25705;P25705-2;P25705-3		0.0474106	0.0110229	0.041636	0.0540777	0.00914382	-0.00801272	0.000334263	-0.0820215	0.0242163	-0.0430971	0.0280325	-0.0353079	-0.0228175	-0.0604265	-0.0285682	0.0142186	-0.00583717	0.0256831	0.00545587	-0.0315123	24	24	24	46.8	46.8	46.8	59.75	0	241.35	11178000000	298
ATP5B	ATP synthase subunit beta, mitochondrial	P06576	P06576		0.0595057	-0.157174	-0.0373271	-0.0155127	-0.0260004	-0.0262502	-0.114006	-0.181174	0.110257	0.170731	0.0251326	0.442967	-0.0144761	-0.132842	-0.0938231	-0.0582938	0.0392703	-0.0457351	-0.0417518	0.0401347	21	21	21	57.7	57.7	57.7	56.559	0	265.51	3949300000	278
ATP5C1	ATP synthase subunit gamma, mitochondrial	P36542-2;P36542	P36542-2;P36542		-0.00942817	-0.0283905	0.0351722	-0.0321362	0.0152094	-0.113735	-0.0237191	-0.0231472	0.012511	0.00464974	0.0721688	0.0364601	-0.0132806	0.0916637	-0.0399606	-0.00671816	-0.0230336	0.0411194	-0.00923624	-0.0425384	8	8	8	28.3	28.3	28.3	32.881	0	54.247	1161800000	51
ATP5D	ATP synthase subunit delta, mitochondrial	P30049	P30049		-0.0209075	0.267629	-0.0268467	-0.0949695	0.0509675	0.170045	0.0377533	0.343214	-0.144871	0.0747573	-0.155973	0.184673	0.0131811	-0.141187	0.0618074	0.0644875	-0.135545	-0.156784	-0.1942	-0.2536	2	2	2	13.7	13.7	13.7	17.49	0	54.286	1386200000	43
ATP5EP2;ATP5E	ATP synthase subunit epsilon-like protein, mitochondrial;ATP synthase subunit epsilon, mitochondrial	Q5VTU8;P56381	Q5VTU8;P56381		0.00375417	0.0417272	0.0813129	0.0244826	0.0394334	-0.0406418	0.0295599	-0.0563293	-0.0148911	-0.0561521	-0.0173659	-0.000963897	-0.0148907	0.0414324	-0.0283543	0.0520464	-0.0363234	0.0138374	0.0112965	-0.12934	3	3	3	45.1	45.1	45.1	5.8068	0	4.5753	851360000	22
ATP5F1	ATP synthase F(0) complex subunit B1, mitochondrial	P24539	P24539		-0.0341538	0.0562275	0.00552997	0.0939948	-0.0303712	-0.0376381	-0.00042668	0.00371867	-0.00638187	0.00821009	-0.00740784	-0.108718	-0.0135979	0.0495583	-0.00410253	-0.00815067	-0.00409624	-0.0104712	0.0190783	-0.027171	9	9	9	29.3	29.3	29.3	28.908	0	50.088	1561500000	79
ATP5H	ATP synthase subunit d, mitochondrial	O75947;O75947-2	O75947;O75947-2		-0.121133	0.0974144	-0.0482811	0.0203054	-0.0669869	-0.013192	-0.0574917	-0.0807368	-0.0180972	0.107806	0.0224317	0.0688964	0.0239803	0.0318597	0.054207	0.00554027	-0.0550171	-0.00934815	-0.044672	0.0261461	10	10	10	64	64	64	18.491	0	63.324	1155300000	74
ATP5I	ATP synthase subunit e, mitochondrial	P56385	P56385		-0.0284824	0.18847	0.00817832	0.0973756	-0.113523	-0.0915151	-0.11667	-0.0392749	-0.0821161	0.012265	-0.0205504	0.0417558	-0.0111861	0.18413	0.102389	-0.047979	-0.0614589	-0.0192975	-0.0117264	-0.0471524	4	4	4	60.9	60.9	60.9	7.9331	0	25.122	466060000	32
ATP5J	ATP synthase-coupling factor 6, mitochondrial	P18859;P18859-2	P18859;P18859-2		0.673651	-0.0105609	0.411035	0.100408	-0.179964	0.750003	-0.112889	0.487629	0.0876716	0.165237	-0.345337	0.622796	-0.204597	-0.54025	-0.252052	-0.24696	-0.460802	-0.303103	-0.422908	-0.275379	2	2	2	30.6	30.6	30.6	12.587	0	24.364	90341000	11
ATP5J2	ATP synthase subunit f, mitochondrial	P56134-3;P56134	P56134-3;P56134		0.0545149	-0.0394157	-0.0564002	0.0987455	0.0829033	-0.0436788	0.0375215	-0.162744	0.0477962	0.105638	-0.0747759	0.0779673	-0.00326681	-0.369112	-0.0189422	0.151238	0.201898	-0.0599918	-0.208375	0.12211	4	2	1	70.9	27.3	23.6	6.2953	0.0016954	2.5782	66260000	2
ATP5J2	ATP synthase subunit f, mitochondrial	P56134-4;P56134-2	P56134-4;P56134-2		0.196834	-0.193672	0.0244489	0.125981	-0.000776	-0.0455977	0.0524478	-0.169	0.0849293	-0.0953048	0.0245439	-0.277705	0.0209879	-0.00897557	0.0567237	0.164672	0.0275655	-0.00870613	0.0331449	-0.0689116	4	4	1	67.3	67.3	18.4	5.7407	0	8.6029	106030000	18
ATP5L	ATP synthase subunit g, mitochondrial	O75964	O75964		0.0918942	-0.0889629	0.0478675	-0.0391981	0.00244179	-0.0315767	0.000110328	-0.100903	0.116698	-0.0605003	0.0131106	-0.0720537	0.0321507	-0.123796	0.0368026	0.0549693	0.012941	0.0259953	0.00769148	0.0179484	6	6	6	54.4	54.4	54.4	11.428	0	37.588	700230000	65
ATP5O	ATP synthase subunit O, mitochondrial	P48047	P48047		0.046754	-0.108332	0.097853	-0.0138708	0.0520835	-0.0250554	0.0203231	-0.0890522	0.100998	-0.023038	0.0671501	-0.00990221	0.000827409	-0.0540317	-0.0905324	0.0168477	-0.0100681	-0.0028523	-0.0352414	0.00277025	8	8	8	45.1	45.1	45.1	23.277	0	94.615	895010000	82
ATP6AP1	V-type proton ATPase subunit S1	Q15904	Q15904		-0.148112	-0.0454944	0.0102331	-0.0526511	0.00721779	-0.116211	0.0911018	-0.353663	-0.100818	0.00360375	0.0699453	-0.104098	0.0164189	0.272954	0.00626928	0.169167	0.0120904	0.075636	0.116089	0.0139511	4	4	4	9.1	9.1	9.1	52.025	0	8.5693	109380000	13
ATP6V0A1	V-type proton ATPase 116 kDa subunit a isoform 1	Q93050-1;Q93050;Q93050-3;Q9HBG4	Q93050-1;Q93050;Q93050-3		0.045438	-0.122213	-0.017854	0.129603	0.0169474	-0.0546564	-0.00992042	-0.120726	0.0589211	-0.0590115	-0.0384594	-0.00819761	0.0963313	-0.151966	0.00231773	0.0560756	0.148694	-0.00119852	0.0836011	-0.110095	7	7	7	10.1	10.1	10.1	95.755	0	11.164	340910000	18
ATP6V0A2	V-type proton ATPase 116 kDa subunit a isoform 2	Q9Y487	Q9Y487		0.0698107	-0.334496	0.170187	-0.359795	0.118538	0.00439668	-0.325784	0.218268	0.00788379	0.127156	0.356255	-0.986995	0.134958	-0.351602	-0.241602	0.283447	0.215907	-0.0152656	0.409774	0.44259	5	5	5	7.1	7.1	7.1	98.081	0	7.2221	49051000	8
ATP6V0D1	V-type proton ATPase subunit d 1	P61421	P61421		0.0823848	-0.355399	-0.0441528	-0.167716	-0.0215587	-0.0646084	-0.156621	0.106506	0.385142	0.0594878	0.428342	-0.348052	-0.0154627	-0.341403	-0.0549641	0.00799389	0.142142	0.10656	0.028404	0.166605	7	7	7	19.9	19.9	19.9	40.329	0	12.134	129780000	20
ATP6V1A	V-type proton ATPase catalytic subunit A	P38606-2;P38606	P38606-2;P38606		-0.0202836	-0.0405752	-0.0208038	-0.0292228	-0.0319018	-0.0509181	-0.00473347	-0.0823647	-0.0251273	0.016776	-0.0521619	0.0207072	0.0277744	0.0832946	0.0603296	0.0453562	0.0149353	0.0033113	0.068696	-0.0394572	13	13	13	22.6	22.6	22.6	64.735	0	23.247	445270000	34
ATP6V1B2	V-type proton ATPase subunit B, brain isoform	P21281;P15313	P21281		-0.00281724	-0.0450282	0.0305659	0.0378264	-0.0417735	0.0209516	-0.0536626	-0.00241524	0.0246505	0.0361239	0.0181012	-0.0906875	-0.00677166	-0.0544687	-0.0213467	0.0503125	0.00893643	0.0374822	-0.00620451	0.00385594	11	11	11	27.4	27.4	27.4	56.5	0	29.21	571560000	37
ATP6V1C1	V-type proton ATPase subunit C 1	P21283	P21283		0.0647562	-0.0645185	0.0468769	0.166408	0.0785067	0.0246279	-0.0926733	0.0594604	0.0539539	-0.0680202	0.0617949	-0.0393262	0.0347312	-0.0455577	-0.182001	0.0182608	-0.072083	-0.0291111	0.0107988	-0.0832543	7	7	6	19.1	19.1	16	43.941	0	6.1122	87828000	8
ATP6V1E1	V-type proton ATPase subunit E 1	P36543-2;P36543;P36543-3;Q96A05	P36543-2;P36543;P36543-3		0.0937678	-0.0433013	0.0410795	0.0860473	0.0393839	-0.0225391	-0.127804	-0.0393499	0.0158583	-0.0696417	-0.00212699	-0.0434871	-0.0655478	-0.180813	-0.054007	0.0296734	0.198444	0.0116745	0.0231737	0.0531459	4	4	4	19.1	19.1	19.1	23.587	0	10.784	266710000	12
ATP6V1F	V-type proton ATPase subunit F	Q16864;Q16864-2	Q16864;Q16864-2		-0.399758	0.438962	-0.089659	0.138497	-0.0534781	0.023802	-0.0821689	0.523832	-0.287236	0.100903	-0.221936	0.0254986	0.0428756	0.158479	-0.0263135	-0.0204768	-0.0149207	-0.032344	-0.0842122	-0.196716	2	2	2	16.8	16.8	16.8	13.37	0	4.4179	52078000	7
ATP6V1G1	V-type proton ATPase subunit G 1	O75348;O95670-2;O95670	O75348		-0.0706149	0.029861	-0.0370166	-0.0167976	-0.0842683	0.0336126	0.00206116	-0.0630522	-0.00467026	-0.0403121	0.068264	0.0556515	0.0183701	0.184435	0.107944	0.0527554	-0.0850024	-0.00412563	-0.0582612	-0.145204	3	3	2	33.9	33.9	21.2	13.757	0	19	164960000	13
ATP6V1H	V-type proton ATPase subunit H	Q9UI12-2;Q9UI12	Q9UI12-2;Q9UI12		0.0573479	-0.298975	-0.147405	0.0175175	-0.00340176	0.219872	0.0137456	0.0980825	0.244579	-0.00886211	0.126835	-0.638434	0.0394374	-0.163902	-0.137757	-0.0480222	0.0460847	-0.154894	0.371401	0.310382	4	4	4	12	12	12	54.151	0	6.422	53530000	9
ATPAF1	ATP synthase mitochondrial F1 complex assembly factor 1	Q5TC12-2;Q5TC12-3;Q5TC12	Q5TC12-2;Q5TC12-3;Q5TC12		0.103996	-0.187416	-0.142046	0.186662	0.0098915	0.182905	-0.179115	0.0742292	0.029492	-0.199465	-0.186639	-0.18048	-0.0439319	-0.00234777	-0.100938	0.219185	0.0482095	0.0359522	-0.0318312	0.307318	2	2	2	11.9	11.9	11.9	20.281	0	5.3241	42327000	6
ATPIF1	ATPase inhibitor, mitochondrial	Q9UII2;Q9UII2-3;Q9UII2-2	Q9UII2;Q9UII2-3;Q9UII2-2		0.264633	0.686546	0.229909	0.0191998	-0.0899661	0.338293	-0.0478741	0.715985	-0.472902	0.343835	-0.561625	0.808493	-0.273537	0.196568	-0.142636	-0.0193375	-0.553645	-0.462539	-0.582564	-0.453205	6	6	6	37.7	37.7	37.7	12.249	0	14.098	2692700000	30
ATRX	Transcriptional regulator ATRX	P46100-2;P46100-5;P46100-3;P46100-4;P46100;P46100-6	P46100-2;P46100-5;P46100-3;P46100-4;P46100;P46100-6		-0.151038	0.218236	-0.479416	-0.403966	-0.0964929	0.109075	0.291519	0.00217468	-0.080112	0.0278533	-0.0880334	0.131992	-0.344936	0.150136	0.111482	0.196173	0.304592	-0.160028	0.0148048	0.189615	2	2	2	1.2	1.2	1.2	259.84	0	3.7214	28384000	4
ATXN10	Ataxin-10	Q9UBB4;Q9UBB4-2	Q9UBB4;Q9UBB4-2		0.0992896	-0.0282313	0.0381965	0.0387001	-0.00372792	-0.0134305	0.00138846	-0.0209516	-0.00215757	-0.0402828	-0.0364994	0.00212517	-0.0176152	0.0135214	-0.0404248	0.000380229	0.0191329	-0.0492128	0.00288324	-0.0194526	17	17	17	38.1	38.1	38.1	53.488	0	78.355	825300000	52
ATXN2	Ataxin-2	Q99700-2;Q99700-4;Q99700;Q99700-5	Q99700-2;Q99700-4;Q99700;Q99700-5		-0.131767	0.151728	0.116968	-0.0535647	0.0369011	-0.175907	-0.0535229	0.189518	-0.161253	0.0569058	-0.114447	-0.228162	0.00932093	0.0783852	0.28046	-0.0433474	0.0220393	0.0909331	-0.0856041	-0.0419533	5	4	4	6.6	5.8	5.8	106.05	0	15.981	95242000	6
ATXN2L	Ataxin-2-like protein	Q8WWM7-6;Q8WWM7-8;Q8WWM7-5;Q8WWM7-4;Q8WWM7-9;Q8WWM7-2;Q8WWM7;Q8WWM7-3;Q8WWM7-7	Q8WWM7-6;Q8WWM7-8;Q8WWM7-5;Q8WWM7-4;Q8WWM7-9;Q8WWM7-2;Q8WWM7;Q8WWM7-3;Q8WWM7-7		-0.0597383	0.00845093	-0.0400527	-0.0357925	-0.0549181	0.0272543	-0.0451406	0.0261101	-0.0467522	0.0409294	0.0714735	0.0772154	-0.0177476	0.0661309	-0.0175979	-0.0402036	-0.0174756	0.0311516	0.00395594	-0.0336225	23	23	22	26.2	26.2	25.4	102.89	0	103.22	1335400000	84
ATXN7L3B	Putative ataxin-7-like protein 3B	Q96GX2	Q96GX2		0.187393	-1.66844	-0.110042	-0.118113	-0.791714	0.134655	-0.120716	0.382832	0.332138	-0.405497	-0.318336	0.0176594	-0.279536	1.80851	0.201334	0.0966811	0.442112	0.217667	-0.049775	-0.0151794	2	2	2	30.9	30.9	30.9	10.771	0.00030769	3.4596	30448000	3
AUP1	Ancient ubiquitous protein 1	Q9Y679;Q9Y679-3	Q9Y679;Q9Y679-3		-0.0662399	-0.0541162	-0.12936	-0.192336	0.0103052	-0.322648	-0.0845232	0.145309	-0.0621754	0.0470736	0.00773209	-0.0230689	0.0576381	0.254654	0.101093	0.0353849	0.0861473	0.0266471	0.0594896	0.0466247	6	6	6	16.1	16.1	16.1	45.786	0	10.462	133640000	10
B2M	Beta-2-microglobulin;Beta-2-microglobulin form pI 5.3	P61769	P61769		-0.103285	0.571903	-0.090313	0.00122844	0.0462034	0.0091208	-0.0241776	0.335957	-0.209331	0.122106	-0.0933965	0.191497	-0.111167	0.139568	0.09508	-0.165108	-0.257728	-0.230105	-0.153577	-0.130846	2	2	2	16.8	16.8	16.8	13.714	0	9.6164	133430000	8
B4GAT1	Beta-1,4-glucuronyltransferase 1	O43505	O43505		0.182165	0.126734	-0.0152078	-0.0247368	0.0649105	0.167322	-0.208291	0.370048	-0.0437009	-0.0367107	-0.00245172	0.1625	-0.174459	-0.102627	0.0645038	-0.27399	0.116202	-0.322551	0.00896922	-0.114999	2	2	2	6	6	6	47.119	0	5.2836	11268000	2
BABAM1	BRISC and BRCA1-A complex member 1	Q9NWV8-3;Q9NWV8;Q9NWV8-2	Q9NWV8-3;Q9NWV8		-0.132419	0.0405714	-0.0870939	0.0813594	-0.117195	-0.158751	0.0800241	0.0889913	0.047771	-0.0319659	0.113187	-0.340273	0.0129852	0.120851	-0.0180588	-0.118359	0.015629	0.179809	0.12086	0.0457085	3	3	3	31	31	31	18.62	0	21.068	69564000	6
BAG2	BAG family molecular chaperone regulator 2	O95816-2;O95816	O95816-2;O95816		-0.00485191	-0.0613059	-0.0305995	0.0207493	0.0113056	-0.0251323	-0.0869407	0.100201	0.109987	0.0301363	0.00829774	0.0349213	0.0134334	-0.136219	-0.00527602	-0.0168363	0.0327187	0.00721403	-0.0410504	-0.0171217	6	6	6	37.1	37.1	37.1	20.189	0	71.021	651020000	33
BAG3	BAG family molecular chaperone regulator 3	O95817	O95817		-0.068534	0.263998	-0.071133	-0.130032	-0.064717	0.276179	-0.0622686	0.479622	-0.0919944	0.129744	-0.0282903	0.291887	0.0256857	-0.0155511	0.0525687	-0.221753	-0.234541	-0.242983	-0.150347	-0.193909	9	9	9	19.8	19.8	19.8	61.594	0	31.507	298250000	33
BAG6	Large proline-rich protein BAG6	P46379-2;P46379;P46379-3;P46379-5;P46379-4	P46379-2;P46379;P46379-3;P46379-5;P46379-4		-0.0124803	0.0622645	0.0100958	-0.101494	-0.00526733	-0.00409904	0.0377142	0.0109043	0.0305313	0.0306761	-0.0552292	-0.0227302	-0.0485335	-0.0873213	-0.115705	0.0458202	0.0219698	-0.0104547	0.114897	0.0420711	11	11	11	12	12	12	118.69	0	57.556	481440000	51
BAIAP2	Brain-specific angiogenesis inhibitor 1-associated protein 2	Q9UQB8-3;Q9UQB8-5;Q9UQB8-4;Q9UQB8-6;Q9UQB8-2;Q9UQB8	Q9UQB8-3;Q9UQB8-5;Q9UQB8-4;Q9UQB8-6;Q9UQB8-2;Q9UQB8		-0.0205034	-0.187344	-0.0277327	-0.405677	-0.048521	0.050952	-0.165042	0.257624	0.0652863	0.100323	0.0998725	0.158281	0.0545951	-0.0987118	-0.0771877	-0.0994444	0.0665372	-0.00532756	0.0947729	0.130878	3	3	3	5.7	5.7	5.7	56.625	0.0017007	2.6021	17661000	4
BAIAP2L1	Brain-specific angiogenesis inhibitor 1-associated protein 2-like protein 1	Q9UHR4	Q9UHR4		-0.00640896	-0.156416	-0.0831406	0.0758266	-0.0348643	0.0671884	-0.0918648	-0.00857878	-0.0014174	-0.00251913	0.0331979	0.0330861	-0.0309999	0.0304015	0.0697712	-0.0436834	0.0747884	0.0375326	-0.0835455	0.0652765	5	5	5	9	9	9	56.882	0	5.851	90626000	9
BANF1	Barrier-to-autointegration factor;Barrier-to-autointegration factor, N-terminally processed	O75531	O75531		-0.100789	0.736372	0.13298	0.0863037	-0.162623	0.322145	0.0605983	0.358989	-0.564739	0.100085	-0.519101	0.487357	-0.125659	0.342893	0.0525298	-0.0555795	-0.515844	-0.0545541	-0.343132	-0.294601	5	5	5	37.1	37.1	37.1	10.058	0	15.138	2330200000	43
BASP1	Brain acid soluble protein 1	P80723;P80723-2	P80723;P80723-2		0.877456	0.232046	0.738376	-0.299651	-0.206414	0.48042	-0.344752	0.872192	-0.37913	0.299849	-0.486501	1.15844	-0.202012	0.198708	-0.315399	-0.131551	-0.653861	-0.669777	-0.797614	-0.427191	13	13	13	85.5	85.5	85.5	22.693	0	204.09	3950100000	94
BAX	Apoptosis regulator BAX	Q07812-5;Q07812-8;Q07812;Q07812-2;Q07812-7;Q07812-4	Q07812-5;Q07812-8;Q07812;Q07812-2;Q07812-7		-0.00182304	0.0854149	0.0955231	0.382703	-0.118731	0.0857457	-0.0424497	0.262625	0.125532	0.0678112	0.360986	-0.444755	-0.0970698	-0.035822	-0.305138	-0.340595	0.105291	-0.239064	-0.080376	0.0778216	3	3	3	27.4	27.4	27.4	18.129	0	11.539	43519000	7
BCAP29	B-cell receptor-associated protein 29	Q9UHQ4;Q9UHQ4-2	Q9UHQ4;Q9UHQ4-2		0.0562281	-0.0317554	0.0865726	0.0659858	-0.0329029	0.281822	-0.0389585	-0.081548	-0.0857779	-0.230977	-0.0371926	0.0253358	-0.0649739	0.0261783	0.114035	0.0519073	0.171065	-0.111621	-0.0154291	-0.204363	3	3	3	15.8	15.8	15.8	28.32	0	8.4495	78176000	3
BCAP31	B-cell receptor-associated protein 31	P51572;P51572-2	P51572;P51572-2		0.037595	-0.00252634	0.0725873	0.0505575	-0.00945511	-0.0119403	0.0305112	-0.0463877	-0.0125139	-0.0383673	0.00775623	-0.0275232	-0.0286468	0.094693	-0.0227443	-0.0151443	-0.0308239	-0.0207288	-0.0356048	-0.0476629	10	10	10	36.2	36.2	36.2	27.991	0	53.397	2120400000	64
BCAS2	Pre-mRNA-splicing factor SPF27	O75934	O75934		-0.0919273	0.161833	-0.0753715	-0.175192	-0.00198784	-0.0495151	-0.0843417	-0.0625172	-0.0285614	0.00116825	-0.0983553	0.0829037	-0.00993089	0.282021	0.12528	0.111342	-0.0816757	-0.204139	0.117961	0.0246361	4	4	4	20.4	20.4	20.4	26.131	0	8.6355	103490000	5
BCAT2	Branched-chain-amino-acid aminotransferase, mitochondrial	O15382-2;O15382	O15382-2;O15382		-0.0323822	0.0758128	-0.0927144	-0.00755119	0.00518531	-0.10605	-0.129228	-0.0765318	-0.0594466	-0.0134319	0.147671	0.0198034	-0.0697066	0.193935	0.0162673	0.0403668	-0.0125861	-0.00404372	0.0424579	0.00580353	3	3	3	11	11	11	33.776	0	10.086	87565000	9
BCCIP	BRCA2 and CDKN1A-interacting protein	Q9P287-3;Q9P287;Q9P287-4;Q9P287-2	Q9P287-3;Q9P287;Q9P287-4;Q9P287-2		-0.0497287	-0.103182	0.051699	0.0167841	-0.0104885	0.0474816	0.0229638	-0.0919867	0.0850111	-0.0231501	0.0561171	-0.052726	0.0432979	-0.0983046	0.0367631	-0.0988788	0.0462554	0.040094	0.0503709	-0.0247614	7	7	7	28.1	28.1	28.1	33.442	0	21.141	178450000	19
BCKDHA	2-oxoisovalerate dehydrogenase subunit alpha, mitochondrial	P12694;P12694-2	P12694;P12694-2		0.417476	-0.441963	-0.00579186	0.0491876	0.128335	-0.0230664	0.438081	-0.151909	0.226171	0.357194	0.0555291	-0.531328	0.213779	-0.478336	-0.221539	0.0789734	0.139366	-0.561671	0.217369	0.0377735	2	2	2	6.5	6.5	6.5	50.47	0	7.4121	22724000	6
BCL10	B-cell lymphoma/leukemia 10	O95999	O95999		0.0892492	-0.200365	-0.0361372	-0.117107	-0.0605184	0.138507	-0.349611	0.40114	0.0621085	0.202507	0.206867	0.221846	0.1516	-0.289252	-0.217644	-0.281138	0.00017181	-0.116723	0.0225513	0.115578	5	5	5	24.5	24.5	24.5	26.251	0	8.7337	86431000	7
BCLAF1	Bcl-2-associated transcription factor 1	Q9NYF8-2;Q9NYF8;Q9NYF8-3;Q9NYF8-4	Q9NYF8-2;Q9NYF8;Q9NYF8-3;Q9NYF8-4		-0.103232	0.137626	-0.106098	-0.0952279	-0.014155	0.0637526	0.0446436	0.183346	-0.0354919	0.0721767	0.0143432	0.0676867	0.015573	0.0311771	0.0328243	-0.0325651	-0.116935	-0.0732059	-0.136987	-0.00562024	20	20	19	24.2	24.2	23	105.95	0	124.72	1696600000	102
BCS1L	Mitochondrial chaperone BCS1	Q9Y276	Q9Y276		-0.0446825	-0.104358	0.0207501	0.200528	0.0373482	-0.0260168	-0.116646	0.0625799	0.0325851	0.0613163	0.0247505	-0.0815119	0.0488868	0.0364462	-0.11625	0.0125092	0.0839879	-0.148228	0.0246053	-0.0649704	2	2	2	4.8	4.8	4.8	47.534	0.00030166	3.2695	129120000	7
BDH2	3-hydroxybutyrate dehydrogenase type 2	Q9BUT1-3;Q9BUT1	Q9BUT1-3;Q9BUT1		-0.0921566	-0.157096	0.290858	0.316412	0.0670263	-0.212428	-0.662131	-0.656074	-0.013572	0.0810944	0.118793	-0.262293	-0.0647904	0.107297	0.472604	0.118068	0.0806756	0.181235	0.0246357	0.205472	2	2	2	16.7	16.7	16.7	15.626	0.00058377	2.9149	22783000	2
BICC1	Protein bicaudal C homolog 1	Q9H694-2;Q9H694	Q9H694-2;Q9H694		0.0793543	-0.0475391	-0.225056	-0.708742	0.0310625	-0.0472627	-0.117577	0.614877	0.111791	-0.0115854	-0.0637619	0.215541	0.0107598	-0.0550599	0.221653	0.149959	0.00875631	-0.102991	-0.0594687	-0.0610784	2	2	2	3.1	3.1	3.1	94.287	0.004921	1.8324	185170000	4
BICD2	Protein bicaudal D homolog 2	Q8TD16;Q8TD16-2;Q96G01-4;Q96G01-3;Q96G01	Q8TD16;Q8TD16-2		-0.304912	0.573316	-0.076995	0.105242	0.000520222	0.19704	0.29439	-0.312574	-0.553206	0.0340146	-0.0492996	0.100051	-0.0262045	0.3195	0.112109	-0.157038	-0.204631	-0.0581511	-0.114177	0.0646375	5	5	5	6.3	6.3	6.3	93.532	0	11.982	84169000	8
BID	BH3-interacting domain death agonist;BH3-interacting domain death agonist p15;BH3-interacting domain death agonist p13;BH3-interacting domain death agonist p11	P55957;P55957-2	P55957;P55957-2		-0.0391549	-0.0310833	-0.172776	0.0547056	0.0567212	0.0216709	-0.255256	0.114751	-0.0550355	0.0683135	-0.109938	0.118593	0.20105	-0.419069	0.219847	0.16215	0.0494097	0.124462	-0.182337	0.0166058	2	2	2	12.3	12.3	12.3	21.994	0	81.943	108520000	7
BIRC6	Baculoviral IAP repeat-containing protein 6	Q9NR09	Q9NR09		0.0753017	0.0559713	0.105627	-0.171431	-0.0540668	0.126037	0.0669462	-0.196336	-0.0240235	-0.071284	0.0596628	0.149153	-0.0146742	-0.0622367	-0.103989	-0.00108624	-0.0101641	-0.0435748	0.169853	-0.112055	9	9	9	2	2	2	530.25	0	14.9	62803000	12
BLMH	Bleomycin hydrolase	Q13867	Q13867		0.0403416	-0.0218812	-0.0146826	0.00689535	-0.0313534	0.0118853	0.0544235	-0.0142966	0.0282938	-0.104906	-0.0882607	0.0113675	-0.0287736	0.0534018	0.0240839	-0.0149431	0.0366085	-0.0063312	0.0418573	-0.0400994	13	13	13	33.4	33.4	33.4	52.562	0	34.085	879120000	59
BLOC1S2	Biogenesis of lysosome-related organelles complex 1 subunit 2	Q6QNY1;Q6QNY1-2	Q6QNY1		-0.254825	0.553227	-0.0434189	-0.0676431	-0.10579	0.0328298	0.0697298	0.373218	-0.398764	-0.08066	-0.210912	0.330439	-0.127495	0.593118	0.118129	-0.200334	-0.282874	0.0485183	-0.211931	-0.190933	3	3	3	34.5	34.5	34.5	15.961	0	11.997	76180000	6
BLOC1S3	Biogenesis of lysosome-related organelles complex 1 subunit 3	Q6QNY0	Q6QNY0		0.000583202	0.188338	-0.323479	-0.0153682	-0.013156	0.0700168	0.162682	0.087079	-0.112184	0.0545648	-0.214424	-0.0100864	-0.0258961	-0.0293369	0.244805	0.195249	-0.200356	0.0447116	0.155804	-0.315915	3	3	3	17.8	17.8	17.8	21.255	0	10.52	49827000	4
BLVRA	Biliverdin reductase A	P53004	P53004		0.0941717	-0.0253307	0.0675593	0.0658896	0.0321984	0.00478606	0.0340634	-0.0964901	0.0323402	-0.0779706	0.063319	-0.163047	0.0620924	-0.0863793	-0.0283378	0.00764932	-0.0291636	-0.0294589	0.0130124	0.00272715	11	11	11	33.4	33.4	33.4	33.428	0	23.458	861090000	46
BLVRB	Flavin reductase (NADPH)	P30043	P30043		-0.00734583	0.0628671	0.0693215	-0.0151339	-0.103177	-0.122636	-0.146335	-0.142784	0.053571	-0.0784282	0.112984	-0.00538978	-0.0384819	0.148358	0.0105653	0.0553271	0.0185442	0.0440143	0.0107148	0.017074	3	3	3	20.9	20.9	20.9	22.119	0	6.6574	158320000	10
BNIP1	Vesicle transport protein SEC20	Q12981;Q12981-1;Q12981-2;Q12981-3	Q12981;Q12981-1;Q12981-2;Q12981-3		-0.10156	0.103879	-0.194312	0.0600519	0.172721	0.0555981	-0.0418874	0.174043	0.0149587	0.0865118	-0.268701	-1.17976	0.0975255	-0.426295	-0.359236	0.296203	0.023758	-0.0498109	1.25159	0.22836	2	2	2	7.5	7.5	7.5	26.132	0.00059137	3.0437	33675000	3
BOD1L1	Biorientation of chromosomes in cell division protein 1-like 1	Q8NFC6	Q8NFC6		-0.0761189	-0.0298594	0.0785573	0.1163	-0.0493842	0.170785	-0.308408	-0.0701008	-0.120566	-0.0194547	-0.202374	0.24006	0.0226669	0.0813256	0.217257	-0.062581	-0.0624054	0.0602966	-0.0582173	0.0158518	7	7	6	3.3	3.3	2.8	330.46	0	16.813	86793000	8
BOLA2	BolA-like protein 2	Q9H3K6;Q9H3K6-2	Q9H3K6;Q9H3K6-2		-0.116412	0.336376	-0.0122129	-0.0318813	0.0247704	0.0689637	0.0826682	0.219946	-0.215345	0.0694666	-0.139305	0.237091	-0.0192264	0.157867	0.0375171	-0.0242913	-0.240066	-0.0891092	-0.14843	-0.254757	7	7	6	80.2	80.2	80.2	10.116	0	67.235	3728000000	61
BOLA3	BolA-like protein 3	Q53S33	Q53S33		-0.143696	0.295792	-0.11023	0.0512128	0.0706053	0.0838271	0.0834717	0.31799	-0.195053	0.0398764	-0.188788	0.242921	-0.0458306	0.259405	0.131052	-0.0506046	-0.230626	-0.157014	-0.231197	-0.279483	2	2	2	20.6	20.6	20.6	12.114	0.00030102	3.2487	105950000	8
BPNT1	3(2),5-bisphosphate nucleotidase 1	O95861-4;O95861;O95861-2;O95861-3	O95861-4;O95861;O95861-2;O95861-3		0.026976	0.0114079	0.0511273	0.0534143	-0.0206463	0.0498389	0.0609311	0.0310885	0.0454906	-0.0382927	0.0609061	-0.0390478	-0.035389	-0.0193577	-0.0776305	-0.0952838	-0.0461664	0.00342413	-0.0275476	-0.0516124	10	10	10	45.2	45.2	45.2	29.188	0	20.212	301650000	27
BPTF	Nucleosome-remodeling factor subunit BPTF	Q12830-4;Q12830-2;Q12830	Q12830-4;Q12830-2;Q12830		-0.14112	-0.111534	0.0727777	0.0358573	-0.30312	0.126887	-0.122592	0.178002	-0.307375	0.154317	-0.0525039	-0.0186429	0.184099	0.393268	0.0708872	-0.122509	-0.0226246	0.00448681	0.169633	-0.244565	3	3	3	1.4	1.4	1.4	322.21	0.00059471	3.1072	43716000	5
BRD2	Bromodomain-containing protein 2	P25440-3;P25440;P25440-2;P25440-4	P25440-3;P25440;P25440-2;P25440-4		-0.0416754	-0.0887243	0.113417	-0.0672051	0.0771031	0.0724836	-0.0157068	-0.101395	0.0681764	0.110909	-0.00831991	-0.051759	-0.0140499	-0.161099	-0.017543	0.00341797	0.0050762	-0.0509146	0.0586887	0.0527503	7	7	7	10.1	10.1	10.1	83.15	0	13.407	116070000	11
BRD3	Bromodomain-containing protein 3	Q15059;Q15059-2	Q15059;Q15059-2		0.00746384	-0.1703	-0.208686	-1.2559	0.212524	0.160367	0.172685	0.083438	0.0579056	0.0251829	0.403301	0.729021	0.124822	-0.560883	-0.522122	-1.26802	0.0176287	0.102575	1.06176	0.770872	5	4	4	9	7.7	7.7	79.541	0	8.1582	29428000	5
BRD4	Bromodomain-containing protein 4	O60885;O60885-2;O60885-3	O60885;O60885-2;O60885-3		-0.167661	0.0276317	0.0347039	0.159051	-0.0374454	0.058087	-0.0815957	0.116433	-0.0772083	-0.0568285	-0.0785499	0.0248234	0.109042	0.21598	-0.00753564	-0.136066	-0.000112683	-0.0941999	-0.0579347	-0.00698352	5	5	4	4	4	3.3	152.22	0	11.486	70158000	9
BRE	BRCA1-A complex subunit BRE	Q9NXR7;Q9NXR7-4;Q9NXR7-3;Q9NXR7-1	Q9NXR7;Q9NXR7-4;Q9NXR7-3;Q9NXR7-1		-0.0814384	0.0599912	0.0105923	-0.0918466	0.163312	0.0104933	0.130308	-0.00359392	-0.0633062	0.0705198	0.138474	-0.444458	0.138585	-0.134787	0.350563	-0.052236	-0.099528	-0.0865558	-0.159596	0.088138	3	3	3	10.2	10.2	10.2	43.551	0	4.4772	37956000	5
BRI3BP	BRI3-binding protein	Q8WY22;REV__Q96PE2	Q8WY22		-0.0380212	-0.19522	-0.114137	0.0166803	0.0392591	-0.0106361	-0.0411887	0.0869591	0.0813768	0.0329147	0.0844681	-0.270352	-0.0567319	0.0632012	-0.00116152	0.0381415	0.0420556	0.0190867	0.104744	0.062192	3	3	3	17.1	17.1	17.1	27.835	0	22.412	174450000	12
BRIX1	Ribosome biogenesis protein BRX1 homolog	Q8TDN6	Q8TDN6		0.0787943	0.204763	-0.0152323	0.0791253	0.0789492	-0.0326126	0.00952795	-0.122848	0.234818	-0.0674318	-0.0183415	0.049948	0.00509672	-0.612889	-0.0373703	-0.190754	0.12876	-0.0409624	-0.0417688	0.254059	4	4	4	14.4	14.4	14.4	41.401	0	9.1194	41744000	7
BRK1	Protein BRICK1	Q8WUW1;Q8WUW1-2	Q8WUW1;Q8WUW1-2		-0.0568725	0.223568	-0.00418206	0.0464963	-0.106862	-0.0112006	0.0967586	0.099524	-0.0467998	-0.0316155	-0.115251	-0.0779636	-0.0413166	0.145383	0.102873	-0.0870279	-0.0692277	-0.027771	-0.0466726	-0.0482098	3	3	3	36	36	36	8.7448	0	5.7328	79767000	8
BROX	BRO1 domain-containing protein BROX	Q5VW32-2;Q5VW32	Q5VW32-2;Q5VW32		-0.0906498	0.680734	-0.0814063	0.346319	-0.150779	0.305988	-0.0619523	0.133869	-0.101594	-0.165487	-0.0404396	-0.0926497	-0.0936763	-0.10398	-0.109083	-0.110131	-0.230454	-0.072817	-0.0919888	0.0738086	4	4	4	15.3	15.3	15.3	42.871	0	8.8089	81594000	14
BSG	Basigin	P35613-2;P35613;P35613-3;P35613-4	P35613-2;P35613;P35613-3;P35613-4		0.0604097	0.012491	-0.0136027	0.0979916	0.0346131	0.170262	0.0509448	0.0211384	-0.00382316	0.0330314	-0.0676315	0.147083	-0.0713428	-0.155743	-0.11293	-0.000839904	-0.055834	-0.0467785	-0.117188	-0.0386209	7	7	7	31.2	31.2	31.2	29.221	0	45.088	549990000	46
BTF3	Transcription factor BTF3	P20290	P20290		-0.101503	0.117857	-0.00473672	-0.0706317	-0.0932863	0.0471728	0.0230266	0.0801152	-0.106968	0.151826	0.00597185	0.12944	0.0556949	0.151285	0.00325662	0.0155745	-0.12989	-0.114903	-0.146405	-0.0692666	8	8	2	56.8	56.8	12.6	22.168	0	62.59	855610000	38
BTF3L4	Transcription factor BTF3 homolog 4	Q96K17-2;Q96K17	Q96K17-2;Q96K17		-0.0228936	0.0642175	-0.131811	-0.020546	-0.106917	0.0993106	-0.0385428	0.0760294	0.0767672	0.00797758	0.0795914	0.0258917	0.00398712	-0.0295908	-0.249246	0.040342	-0.12717	0.0115961	0.149782	0.0348543	2	2	2	8	8	8	10.905	0.0073362	1.6422	216960000	3
BUB1B	Mitotic checkpoint serine/threonine-protein kinase BUB1 beta	O60566;O60566-3;O60566-2	O60566;O60566-3;O60566-2		-0.157813	0.100677	0.0823284	0.0249946	0.0751457	-0.0334939	0.0831839	0.199087	-0.276123	-0.0286795	-0.200026	-0.0726718	-0.0714396	0.231061	0.0286295	-0.174228	0.0389397	0.099012	-0.0099678	0.00501549	4	4	4	4.9	4.9	4.9	119.54	0	11.353	74513000	7
BUB3	Mitotic checkpoint protein BUB3	O43684-2;O43684	O43684-2;O43684		0.00807062	-0.0515773	-0.0213925	0.0478767	0.0187788	-0.039546	0.00152043	-0.0226946	0.0396496	0.00024071	0.00126648	-0.0266068	0.0114585	-0.0376156	-0.0274497	-0.00612726	-0.00312015	0.0309464	0.00808211	0.0118702	13	13	13	46	46	46	36.954	0	68.119	1813900000	83
BUD31	Protein BUD31 homolog	P41223;P41223-2	P41223;P41223-2		-0.108015	0.0413699	-0.0474972	-0.22922	0.0793229	-0.0472191	0.0376297	0.0370906	0.00215888	-0.104851	0.0233148	0.0529023	-0.00485019	0.141361	0.0463201	0.0187849	-0.0797183	0.0577276	0.0165529	0.0104667	4	4	4	25.7	25.7	25.7	17	0	6.6225	102630000	8
BYSL	Bystin	Q13895	Q13895		0.0632575	0.0195321	0.0264828	0.0117982	-0.0643285	-0.0243943	-0.00364572	0.0510167	0.119515	-0.00508585	0.0457954	0.00022763	-0.0532181	-0.0610697	-0.102101	0.0100403	0.0264768	-0.0433995	-0.0600876	-0.0131819	12	12	12	34.6	34.6	34.6	49.601	0	66.598	462900000	37
BZW1	Basic leucine zipper and W2 domain-containing protein 1	Q7L1Q6;Q7L1Q6-4;Q7L1Q6-3;Q7L1Q6-2	Q7L1Q6;Q7L1Q6-4;Q7L1Q6-3;Q7L1Q6-2		-0.0128633	0.0594124	0.0498458	0.0390503	0.00955219	-0.0736196	-0.00258914	-0.0909645	-0.0141518	-0.0157665	-0.0422623	-0.0176567	-0.0380151	0.0442622	-0.0125096	0.0288905	-0.0131707	0.0316456	0.0110869	0.00345385	16	16	15	33.4	33.4	31.7	48.043	0	51.322	2366800000	97
BZW2	Basic leucine zipper and W2 domain-containing protein 2	Q9Y6E2;Q9Y6E2-2	Q9Y6E2		-0.00286004	-0.0780557	-0.00500813	0.0569655	-0.0208689	-0.0186286	-0.135237	-0.0167596	0.087101	0.0140856	0.116144	-0.0696324	-0.029613	-0.0478863	-0.111394	0.0159143	0.0270869	0.0469246	0.0678778	0.047475	12	11	11	25.1	23.4	23.4	48.162	0	21.193	409710000	31
C11orf57	Uncharacterized protein C11orf57	Q6ZUT1-3;Q6ZUT1;Q6ZUT1-2	Q6ZUT1-3;Q6ZUT1;Q6ZUT1-2		-0.179263	0.243374	-0.0424609	0.31044	-0.127008	-0.108299	0.0933728	0.230959	-0.122313	0.025104	0.0692388	-0.208116	0.190164	0.255448	-0.950049	-0.0804307	0.0312102	-0.231131	0.13185	0.411541	2	2	2	8.7	8.7	8.7	30.844	0	8.2472	21201000	3
C11orf98	Uncharacterized protein C11orf98	E9PRG8	E9PRG8		-0.313866	0.134639	-0.0952542	0.0684031	0.102671	-0.0494744	0.0606934	0.0671963	-0.0769416	-0.0160668	-0.0479055	0.0387537	0.0586609	0.389901	0.0605595	-0.0133576	-0.193448	-0.0587902	-0.323803	0.151059	2	2	2	17.2	17.2	17.2	13.798	0	6.0596	62533000	14
C12orf10	UPF0160 protein MYG1, mitochondrial	Q9HB07	Q9HB07		0.0174731	-0.0595621	-0.0539303	-0.00809468	0.00052195	0.0919527	-0.0963879	-0.0626672	0.0912074	-0.0380328	0.107745	-0.00646544	0.0271105	-0.264125	-0.0399584	-0.00323506	0.0702529	0.0404873	0.155218	-0.0258784	7	7	7	21.3	21.3	21.3	42.449	0	24.552	356430000	31
C12orf29	Uncharacterized protein C12orf29	Q8N999-3;Q8N999	Q8N999-3;Q8N999		-0.00674257	-0.00739712	0.0373557	0.245289	0.0876334	-0.072416	0.104062	-0.23821	0.0561169	0.0640714	-0.0127115	-0.0640099	-0.0902058	-0.259512	-0.49633	0.0333434	0.518224	-0.312488	0.549322	-0.191766	2	2	2	7.9	7.9	7.9	34.723	0	4.2185	72251000	6
C12orf57	Protein C10	Q99622	Q99622		-0.153607	0.572708	0.00293407	0.0668761	-0.010813	0.272475	-0.067202	0.339024	-0.204632	-0.0259704	-0.146958	0.374617	-0.0687573	-0.077387	-0.12825	-0.125092	-0.260429	-0.066301	-0.162641	-0.186963	4	4	4	49.2	49.2	49.2	13.178	0	29.502	203560000	26
C14orf166	UPF0568 protein C14orf166	Q9Y224	Q9Y224		-0.0358487	0.084806	-0.0593409	-0.0481256	0.0166953	-0.0569645	-0.0222992	-0.00242776	0.0193642	-0.0809768	0.0477374	0.0437356	0.00402489	0.0253586	0.0288898	0.0333761	-0.00183532	0.00266167	-0.0449591	-0.0102414	14	14	14	58.6	58.6	58.6	28.068	0	50.64	1049800000	69
C17orf75	Protein Njmu-R1	Q9HAS0	Q9HAS0		-0.112165	0.0327334	0.0427178	-0.035677	-0.0654858	0.00382066	0.0783338	-0.0659364	-0.182768	0.00675926	-0.072965	0.0518164	0.069484	0.306808	0.0786757	-0.051616	-0.0589776	-0.0229236	-0.0341394	-0.0248647	3	3	3	9.3	9.3	9.3	44.621	0	4.4414	38048000	4
C17orf85	Uncharacterized protein C17orf85	Q53F19-2;Q53F19	Q53F19-2;Q53F19		-0.00758931	-0.0481275	-0.188077	-0.482922	-0.0384499	0.0153365	0.459735	-0.0196549	0.118967	-0.0635607	0.252246	-0.342487	0.174696	-0.193547	-0.299475	0.314816	0.176434	-0.156875	-0.242304	0.514468	2	2	2	7.6	7.6	7.6	38.92	0	6.771	52139000	7
C18orf25	Uncharacterized protein C18orf25	Q96B23-2;Q96B23	Q96B23-2;Q96B23		-0.168415	0.139051	0.109451	-0.269515	0.0116399	0.314846	0.319621	0.406508	-0.17171	0.0488679	-0.297108	0.368589	0.279047	0.329727	0.372859	-0.114262	-0.423084	-0.382685	-0.602775	-0.327022	3	3	3	14.3	14.3	14.3	37.048	0	13.506	104240000	9
C19orf43	Uncharacterized protein C19orf43	Q9BQ61	Q9BQ61		-0.229568	0.168372	-0.0702967	-0.156962	0.0618431	0.0591843	0.0983101	0.281503	-0.132035	0.197844	-0.127959	0.238582	0.0621474	0.126126	0.11036	-0.191751	-0.176218	-0.160411	-0.142877	-0.072565	8	8	8	45.5	45.5	45.5	18.419	0	95.973	2131800000	51
C1orf123	UPF0587 protein C1orf123	Q9NWV4	Q9NWV4		-0.180678	0.34951	-0.157531	0.00620623	-0.117461	0.111325	-0.101057	0.256875	-0.229012	0.040667	-0.04831	0.187932	0.0411015	0.235693	0.0629417	0.0630926	-0.252529	-0.0213321	-0.106263	-0.197541	4	4	4	35	35	35	18.048	0	14	222430000	11
C1orf198	Uncharacterized protein C1orf198	Q9H425-3;Q9H425;Q9H425-2	Q9H425-3;Q9H425;Q9H425-2		-0.0399548	-0.138432	0.0669013	-0.530706	-0.0635578	0.0144003	0.26511	0.196754	-0.0488926	0.0136778	-0.132194	0.147387	0.0221175	0.536186	0.0976149	-0.0480672	-0.255498	-0.0627609	-0.0438075	-0.0526479	2	2	2	8	8	8	32.214	0	3.6738	38762000	4
C1QBP	Complement component 1 Q subcomponent-binding protein, mitochondrial	Q07021	Q07021		-0.0931922	0.18589	-0.10659	0.059868	-0.00600118	0.12185	-0.0306139	0.211657	-0.0640832	0.127673	-0.0386279	0.0334601	0.0107168	-0.111421	-0.0316967	-0.0310528	-0.0809207	-0.113226	-0.0451008	-0.0549579	6	6	6	31.6	31.6	31.6	31.362	0	165.71	2770100000	89
C21orf59	UPF0769 protein C21orf59	P57076	P57076		0.0677417	0.116416	0.228027	-0.262418	0.0666358	0.032254	-0.250876	-0.229917	0.00444531	-0.0949391	0.095142	0.455894	-0.0466425	-0.212259	-0.0624709	-0.319751	-0.0212908	0.0649236	0.150357	0.162358	4	4	4	15.5	15.5	15.5	33.224	0	7.2827	111890000	8
C2orf47	Uncharacterized protein C2orf47, mitochondrial	Q8WWC4	Q8WWC4		0.0932852	-0.0203711	0.180051	0.240461	0.124434	-0.189106	0.0237263	-0.314848	-0.0148424	-0.0558392	0.0756211	0.0822823	0.0158797	0.0463726	-0.0258385	-0.176199	-0.129081	0.106555	-0.164263	0.0453523	4	4	4	13.4	13.4	13.4	32.544	0	7.0882	66652000	9
C4orf27	UPF0609 protein C4orf27	Q9NWY4	Q9NWY4		0.108865	0.0934986	0.361676	0.47198	-0.0163983	0.305521	-1.01424	-1.22652	0.173945	-0.227772	0.216001	-0.485197	0.0443146	-1.07272	-0.50967	0.558628	0.399293	0.168741	1.04704	0.546646	2	2	2	7.5	7.5	7.5	39.436	0.00031133	3.573	25175000	7
C4orf32	Uncharacterized protein C4orf32	Q8N8J7	Q8N8J7		0.0029656	-0.720089	-0.116555	0.0587742	0.140643	-0.0709867	-0.0290984	0.207372	0.095101	0.13829	-0.0727226	-0.305441	0.162813	0.293976	0.147921	0.0609931	0.0721839	-0.137612	-0.0863757	0.101478	2	2	2	30.3	30.3	30.3	14.652	0	21.089	57773000	4
C7orf50	Uncharacterized protein C7orf50	Q9BRJ6	Q9BRJ6		-0.147454	0.179829	-0.0647569	-0.0231031	-0.0331319	0.0720394	-0.0235229	0.178875	-0.119706	-0.00911035	-0.086767	0.0155058	-0.0589516	0.298449	0.0335637	-0.0265348	-0.122656	-0.0820223	-0.0473557	0.0104408	6	6	6	45.9	45.9	45.9	22.083	0	53.93	489130000	32
C8orf33	UPF0488 protein C8orf33	Q9H7E9;Q9H7E9-2	Q9H7E9;Q9H7E9-2		-0.0238844	-0.0864096	-0.10514	-0.0174036	-0.0467637	-0.0571635	-0.049327	0.118621	-0.0437267	0.00297938	-0.248904	0.141874	-0.182121	0.161139	-0.00391245	-0.000134755	0.133353	0.119882	0.0187371	0.111935	4	4	3	31.9	31.9	21.8	24.992	0	12.013	77437000	8
C9orf142	Protein PAXX	Q9BUH6	Q9BUH6		0.0062305	0.0624006	-0.0584479	-0.0944729	-0.12369	-0.111462	-0.0458432	0.0684077	-0.0655869	0.131155	-0.140214	0.263173	-0.0208687	0.190914	-0.277044	0.0774591	-0.0961144	0.00430789	0.0348552	0.138473	2	2	2	8.3	8.3	8.3	21.639	0.00031368	3.6458	57655000	4
C9orf41	UPF0586 protein C9orf41	Q8N4J0	Q8N4J0		-0.143814	0.747694	-0.0489	-0.116046	-0.197855	-0.132477	0.00185165	0.245097	-0.550964	-0.0253752	0.17279	0.0933515	-0.00282488	0.315672	-0.0776756	-0.0809647	-0.303542	0.270771	-0.147821	-0.0753363	2	2	2	4.9	4.9	4.9	47.185	0	5.9389	37399000	4
C9orf64	UPF0553 protein C9orf64	Q5T6V5	Q5T6V5		0.00545588	0.0278822	0.0295907	-0.0442799	-0.0657022	-0.0486933	0.0163432	-0.0471699	0.0202168	0.0634744	-0.0699846	0.0112568	-0.0585114	-0.00925595	0.0503814	0.0170096	0.028626	0.013793	0.0123343	-0.00913656	12	12	12	27.9	27.9	27.9	39.028	0	16.966	293370000	31
C9orf78	Uncharacterized protein C9orf78	Q9NZ63	Q9NZ63		-0.157702	0.225835	-0.112367	-0.136924	-0.00433541	-0.0905246	0.00383261	0.257074	-0.142452	0.052607	-0.149741	0.24152	0.0719596	0.253453	0.0949606	-0.104862	-0.135591	-0.0959648	0.0129158	-0.140065	5	5	5	13.8	13.8	13.8	33.688	0	11.887	177470000	16
CA2	Carbonic anhydrase 2	P00918	P00918		0.0249521	-0.228582	0.151695	-0.010873	-0.0358414	-0.00895915	-0.149118	-0.147522	-0.0210769	-0.0109148	0.0824866	-0.0391214	-0.0405696	0.157649	0.0449622	0.0975394	0.0606011	0.0800278	-0.110927	0.0472233	8	8	7	34.6	34.6	31.5	29.246	0	20.675	270450000	22
CAAP1	Caspase activity and apoptosis inhibitor 1	Q9H8G2;Q9H8G2-2	Q9H8G2;Q9H8G2-2		-0.100851	0.199246	0.188378	-0.0809859	-0.153591	0.213234	-0.273124	0.0961663	0.0793422	0.0846874	0.231724	0.458325	-0.109795	0.101838	-0.247143	-0.27533	-0.0389814	-0.297843	-0.0525118	-0.0791545	3	3	3	12.2	12.2	12.2	38.367	0	11.662	30172000	4
CAB39	Calcium-binding protein 39	Q9Y376	Q9Y376		0.102063	-0.138827	0.0094903	-0.0259081	-0.0106808	-0.0489202	-0.120335	-0.0153084	0.0328398	0.0540998	-0.0027914	0.0274341	0.0897574	-0.081551	-0.0501949	0.0584775	0.0704161	-0.0919122	0.100264	-0.0147831	6	6	6	18.5	18.5	18.5	39.869	0	15.105	159760000	17
CACYBP	Calcyclin-binding protein	Q9HB71;Q9HB71-3;Q9HB71-2	Q9HB71;Q9HB71-3		0.0449333	-0.0662168	0.0566033	0.0374708	0.0202202	-0.0217796	0.00218669	-0.0761656	0.0224371	-0.0378153	0.0390116	-0.0719191	-0.0382495	0.0379053	-0.0268435	0.0222852	0.00195852	0.0138922	0.00151186	-0.0177961	14	14	14	48.2	48.2	48.2	26.21	0	60.933	2571300000	96
CAD	CAD protein;Glutamine-dependent carbamoyl-phosphate synthase;Aspartate carbamoyltransferase;Dihydroorotase	P27708;P31327-2;P31327;P31327-3	P27708		0.0539456	0.00307149	0.0434176	0.0384529	-0.00372086	0.0162682	-0.00382835	-0.0162178	0.00810337	-0.0523741	0.0275044	-0.0693739	0.0108209	-0.0531649	-0.0367677	-0.042624	0.0102402	-0.0159044	0.0121013	0.0136807	38	38	38	18.4	18.4	18.4	242.98	0	113.58	1580400000	123
CADM1	Cell adhesion molecule 1	Q9BY67-5;Q9BY67;Q9BY67-4;Q9BY67-3;Q9BY67-2	Q9BY67-5;Q9BY67;Q9BY67-4;Q9BY67-3		-0.0631569	0.0873651	-0.0368368	0.0602063	0.0546633	0.100732	0.0807045	0.0571713	-0.0373228	0.0303841	-0.123252	-0.0101564	-0.0360263	-0.0422699	0.0767406	-0.0193047	-0.0574285	-0.0596549	0.0181658	-0.137093	7	7	7	21.7	21.7	21.7	45.623	0	39.904	343970000	21
CALD1	Caldesmon	Q05682-5;Q05682-4;Q05682-3;Q05682-6;Q05682-2;Q05682	Q05682-5;Q05682-4;Q05682-3;Q05682-6;Q05682-2;Q05682		-0.11328	0.0974405	-0.0569868	-0.186427	-0.145506	0.0795055	-0.00021553	0.173099	0.0344201	0.136327	0.0163257	0.154364	0.0318333	0.0496117	0.0391432	-0.118878	-0.0753586	-0.117707	-0.0373026	-0.0167775	17	17	17	31.2	31.2	31.2	61.212	0	114.09	1303600000	83
CALR	Calreticulin	P27797	P27797		-0.12728	0.227839	-0.0211192	0.022481	-0.0263712	-0.0225431	0.0924081	0.161345	-0.227844	0.0745594	-0.184175	0.206523	0.032524	0.282875	0.123681	-0.0408252	-0.166703	-0.0697704	-0.116212	-0.277762	22	22	22	53.2	53.2	53.2	48.141	0	291.17	23602000000	320
CALU	Calumenin	O43852;O43852-3;O43852-5;O43852-6;O43852-9;O43852-10;O43852-13;O43852-14;O43852-15;O43852-11;O43852-12	O43852;O43852-3;O43852-5;O43852-6;O43852-9;O43852-10;O43852-13;O43852-14;O43852-15;O43852-11		-0.237217	0.408107	-0.137743	-0.085026	0.0145573	0.0476498	0.155235	0.34258	-0.334537	0.0473841	-0.25536	0.297682	0.0543733	0.407351	0.21141	-0.0477786	-0.312277	-0.118106	-0.159645	-0.355009	16	16	3	57.5	57.5	12.4	37.106	0	173.91	5533100000	147
CAMK1D	Calcium/calmodulin-dependent protein kinase type 1D	Q8IU85-2;Q8IU85	Q8IU85-2;Q8IU85		-0.159856	0.0259349	-0.384063	-0.0991505	-0.0405165	0.036715	-0.212715	0.263977	-0.131503	0.0737513	0.0263317	0.036223	-0.106516	0.00530297	0.0179288	0.117361	0.0390116	0.234962	0.186026	0.0144259	4	3	3	14	9	9	40.189	0.00058514	2.9322	35977000	8
CAMK2D	Calcium/calmodulin-dependent protein kinase type II subunit delta	Q13557-12;Q13557-8;Q13557-10;Q13557;Q13557-6;Q13557-11;Q13557-9;Q13557-5;Q13557-3;Q13557-4;Q13554-7;Q9UQM7;Q13554-4;Q9UQM7-2;Q13554-6;Q13555-10;Q13554-3;Q13554-8;Q13554-5;Q13555-3;Q13555-5;Q13555-4;Q13555-7;Q13555-11;Q13555-9;Q13554-2;Q13555-2;Q13555-8;Q13555;Q13555-6;Q13554	Q13557-12;Q13557-8;Q13557-10;Q13557;Q13557-6;Q13557-11;Q13557-9;Q13557-5;Q13557-3;Q13557-4		0.0110591	-0.878635	-0.023192	0.0655217	0.184157	0.192972	-0.316988	0.102616	0.234295	-0.00530901	-0.0635766	-0.133654	0.239901	-0.0925819	0.0830803	0.0346987	0.213879	-0.122452	-0.155126	0.372964	4	4	4	11.3	11.3	11.3	54.113	0	13.776	52127000	10
CAMSAP1	Calmodulin-regulated spectrin-associated protein 1	Q5T5Y3-2;Q5T5Y3;Q5T5Y3-3	Q5T5Y3-2;Q5T5Y3;Q5T5Y3-3		-0.152129	0.355552	-0.110744	-0.0990054	0.0129247	0.144405	0.114397	0.0209216	-0.0850381	0.0945062	0.107635	-0.0633042	-0.154447	0.0927445	-0.0765669	-0.0227051	-0.118258	-0.212975	0.259114	-0.163397	2	2	2	1.5	1.5	1.5	146.54	0.00030021	3.2174	28981000	4
CAMSAP3	Calmodulin-regulated spectrin-associated protein 3	Q9P1Y5;Q9P1Y5-2	Q9P1Y5;Q9P1Y5-2		-0.17988	0.0412224	-0.031812	-0.102889	-0.139967	-0.165453	0.153333	-0.133628	0.0544263	-0.120792	0.0551457	-0.0619343	0.00244198	0.366316	0.011616	-0.0657544	0.02931	0.0896617	0.0682927	0.0739758	2	2	2	1.7	1.7	1.7	134.75	0.0011488	2.7317	22709000	3
CAND1	Cullin-associated NEDD8-dissociated protein 1	Q86VP6;Q86VP6-2;Q86VP6-3;O75155-2	Q86VP6;Q86VP6-2		0.0613615	-0.0419379	0.025641	0.024964	0.0253302	-0.0188173	-0.00639296	-0.0627134	0.0364316	-0.0341034	0.0243322	-0.0471411	-0.0194886	-0.0588676	-0.00293344	0.0223153	0.00882706	0.0185502	-0.0156604	0.00393391	45	45	41	37.5	37.5	34	136.37	0	228.76	4700300000	283
CANX	Calnexin	P27824;P27824-2;P27824-3	P27824;P27824-2;P27824-3		0.0449189	-0.0420938	0.0268981	0.0277508	0.018119	-0.0470169	-0.00530177	-0.0761867	0.0565774	-0.0375761	0.00977176	-0.0248993	-0.0152976	-0.0125853	0.0134833	0.0146518	-0.00236467	0.0146044	-0.00995912	-0.00986362	23	23	23	39.5	39.5	39.5	67.567	0	204.24	7823700000	162
CAP1	Adenylyl cyclase-associated protein 1	Q01518-2;Q01518	Q01518-2;Q01518		0.0262917	-0.0130125	0.0209569	0.00575733	0.0138409	-0.0580928	-0.000687689	-0.0409712	0.0227811	-0.014625	0.0207239	-0.0462595	0.00389414	-0.0125014	0.00965166	0.0112149	0.00262687	0.00608239	-0.000506118	-0.0135351	18	18	18	34.6	34.6	34.6	51.83	0	121.63	3153100000	162
CAP2	Adenylyl cyclase-associated protein 2	P40123-2;P40123	P40123-2;P40123		-0.0128275	-0.319567	-0.248907	-0.108311	-0.0542366	-0.00537124	-0.0723169	0.0773295	-0.0125529	-0.0699347	-0.135675	0.00471467	0.0827617	0.311601	0.131324	0.247464	0.116368	-0.0589557	0.0720917	-0.00136781	3	3	3	8	8	8	45.245	0	9.216	77970000	5
CAPN1	Calpain-1 catalytic subunit	P07384	P07384		0.0470783	-0.0383732	0.0245656	0.0987616	-0.0187173	0.0434986	-0.0318767	-0.0294584	-0.00294673	0.00523081	0.0341822	-0.0266548	-0.00894203	-0.0553935	-0.0971131	0.0200517	-0.00493166	0.0107824	0.0183404	-0.0444532	18	18	17	28.2	28.2	25.5	81.889	0	40.943	669890000	50
CAPN2	Calpain-2 catalytic subunit	P17655;P17655-2	P17655;P17655-2		0.083589	-0.0408296	0.0485359	0.0587174	0.00865727	-0.00799766	-0.0332407	-0.00639504	0.0468925	-0.0571545	0.026027	-0.0889396	-0.00849734	-0.0247412	-0.0726612	-0.000244714	-0.00385758	-0.0187755	0.00610733	0.0284387	14	14	14	24.6	24.6	24.6	79.994	0	63.479	772450000	71
CAPNS1	Calpain small subunit 1	P04632;Q96L46	P04632		0.0493849	-0.0369135	-0.0199682	0.0200004	-0.0243891	-0.0663621	0.00136259	-0.0730929	0.0381153	-0.0127529	0.0384459	-0.0846612	-0.0439031	0.0435775	0.0275158	0.0364767	-0.00148252	0.0320109	-0.00106792	0.021334	5	5	5	17.9	17.9	17.9	28.315	0	47.261	768230000	38
CAPRIN1	Caprin-1	Q14444-2;Q14444	Q14444-2;Q14444		-0.0652674	0.234727	-0.0143584	-0.0498636	0.0350386	0.0176569	0.0647965	0.195659	-0.0921085	0.0646935	-0.0937216	0.204733	0.0335032	0.0968712	0.0512292	-0.0567924	-0.187458	-0.160371	-0.153581	-0.181756	13	13	13	18	18	18	76.861	0	78.535	2659100000	112
CAPZA1	F-actin-capping protein subunit alpha-1	P52907	P52907		0.130621	-0.105346	0.0996431	0.0149245	0.0220644	0.0088408	-0.0186821	-0.0799798	0.0289314	-0.022551	-0.0477895	0.000244051	0.0180953	-0.0962254	0.0226679	0.0407259	-0.0262132	0.0190686	-0.0536959	-0.0117131	12	12	9	55.6	55.6	43.7	32.922	0	97.8	1222200000	57
CAPZA2	F-actin-capping protein subunit alpha-2	P47755;P47755-2	P47755;P47755-2		0.0108425	-0.0257236	0.01035	0.0335521	-0.0643544	0.0109678	-0.0396511	0.0287356	-0.00327098	-0.0141278	-0.0474877	-0.0859372	0.00835189	0.00991887	0.0294813	0.0251671	0.0550392	-0.0103577	0.00240345	0.00973159	12	9	9	55.9	44.1	44.1	32.949	0	87.341	543780000	46
CAPZB	F-actin-capping protein subunit beta	P47756-2;P47756	P47756-2;P47756		0.0694795	-0.0340508	0.0484472	0.0527579	0.0101689	-0.0308733	-0.0991234	-0.0971877	0.0595183	-0.00455637	0.0396999	-0.0223702	-0.00527668	-0.142481	-0.0487602	0.0362352	0.0167123	0.0386444	0.0228434	0.0338031	15	15	14	59.2	59.2	54.4	30.628	0	52.847	1364300000	94
CARHSP1	Calcium-regulated heat stable protein 1	Q9Y2V2	Q9Y2V2		-0.319668	0.46817	-0.17316	-0.210346	-0.0616608	-0.0131053	0.110532	0.356031	-0.311632	0.0921225	-0.230296	0.22276	0.00242815	0.340987	0.192465	-0.0230594	-0.239533	0.0191761	-0.0647296	-0.213852	3	3	3	29.3	29.3	29.3	15.892	0	42.016	781070000	36
CARM1	Histone-arginine methyltransferase CARM1	Q86X55-1;Q86X55;Q86X55-2	Q86X55-1;Q86X55;Q86X55-2		0.0462969	-0.0290838	0.269435	0.0144643	-0.0432795	-0.0394866	-0.0311234	-0.260996	0.0457447	0.0407673	0.140233	-0.135166	-0.0320699	-0.340383	-0.0517594	0.0338093	0.11832	0.21046	-0.0199259	0.00737506	7	7	7	12.8	12.8	12.8	63.459	0	12.119	225460000	18
CARS	Cysteine--tRNA ligase, cytoplasmic	P49589-2;P49589;P49589-3	P49589-2;P49589;P49589-3		-0.104687	-0.0247605	-0.0745129	-0.047829	0.0607018	-0.0291839	0.0949627	0.0683082	-0.0523672	0.00297909	0.0270007	-0.217467	0.0158296	0.131133	-0.0321825	0.0898746	0.0338284	-0.0561876	-0.00511837	0.0633088	7	7	7	10.6	10.6	10.6	82.845	0	18.023	178200000	23
CARS2	Probable cysteine--tRNA ligase, mitochondrial	Q9HA77	Q9HA77		0.0246471	-0.0625926	-0.0577978	-0.0682242	-0.00023108	-0.0443776	0.023027	-0.208477	-0.0591238	0.0219851	0.0257514	0.150955	0.0171335	-0.0122415	0.0474798	-0.0160233	-0.0504895	0.142576	0.046752	0.0229017	5	5	5	10.3	10.3	10.3	62.223	0	8.0199	127450000	10
CASC3	Protein CASC3	O15234	O15234		-0.45134	0.47136	-0.268874	-0.170371	-0.0359384	-0.0465851	0.118322	0.365206	-0.558713	0.0558341	-0.345968	0.329445	0.0897551	0.698514	0.269113	-0.0596929	-0.342259	0.0966583	-0.0462865	-0.224548	4	4	4	8.3	8.3	8.3	76.277	0	23.544	256530000	14
CASK	Peripheral plasma membrane protein CASK	O14936-3;O14936-4;O14936-6;O14936-2;O14936;O14936-5	O14936-3;O14936-4;O14936-6;O14936-2;O14936		0.0868146	0.0402892	-0.0302176	0.109885	0.0527782	-0.11498	0.0190893	-0.336188	-0.111701	-0.133918	-0.0204121	0.24726	0.0251027	0.119134	0.0790893	-0.0331865	-0.0172136	0.0309798	-0.0218992	-0.0470752	5	5	5	5.4	5.4	5.4	102.11	0	8.4521	116610000	10
CASP3	Caspase-3;Caspase-3 subunit p17;Caspase-3 subunit p12	P42574	P42574		0.11376	0.0486092	0.0985925	-0.0675574	-0.0193233	-0.00493226	-0.0355942	0.0307574	-0.0511076	-0.0879979	-0.0421414	0.0566876	-0.0101002	-0.00121754	-0.0466	-0.117108	0.0326827	-0.0430872	0.045582	0.0437263	4	4	4	18.4	18.4	18.4	31.608	0	24.397	289790000	17
CASP6	Caspase-6;Caspase-6 subunit p18;Caspase-6 subunit p11	P55212;P55212-2	P55212;P55212-2		-0.0639596	-0.301755	0.0388115	0.065462	0.0772618	0.0223894	-0.0883772	0.121181	0.0951076	0.0806277	-0.088244	0.0540698	-0.0127382	0.0964499	-0.0823504	0.0654951	0.0584518	-0.0745501	-0.159824	0.0401214	2	2	2	7.5	7.5	7.5	33.31	0	4.5021	62926000	4
CASP7	Caspase-7;Caspase-7 subunit p20;Caspase-7 subunit p11	P55210;P55210-4;P55210-3;P55210-2	P55210;P55210-4;P55210-3		0.0674219	-0.29789	-0.0314946	0.0681511	0.0737299	0.0309777	-0.0809636	-0.112213	0.199448	-0.478852	-0.0887201	-0.0908604	0.150227	-0.443228	0.205973	0.209387	0.0396887	0.635763	0.0587253	-0.171639	6	6	5	30.7	30.7	21.8	34.276	0	24.082	129250000	11
CAST	Calpastatin	P20810-5;P20810-10;P20810-6;P20810-9;P20810-7	P20810-5;P20810-10;P20810-6;P20810-9;P20810-7		-0.254415	0.448186	-0.172763	-0.131241	0.0125381	-0.0629985	0.0888835	0.415515	-0.384575	0.0719496	-0.268003	0.357245	0.0318845	0.436536	0.164704	-0.0260697	-0.260364	-0.0614568	-0.135554	-0.326373	23	23	5	38.5	38.5	7.5	81.168	0	112.09	1376800000	91
CAT	Catalase	P04040	P04040		-0.0896188	-0.0560861	-0.0486563	0.00287275	-0.0943049	-0.0120246	0.0169012	-0.0784236	-0.026849	0.00553665	0.0697278	0.0235392	0.0476516	0.169894	0.0333736	-0.0540476	-0.031817	0.0649041	0.0484892	-0.0474312	8	8	8	20.7	20.7	20.7	59.755	0	33.004	230510000	21
CAV1	Caveolin-1	Q03135	Q03135		-0.0302071	0.0484697	0.153993	-0.0388367	0.0223788	0.0815362	-0.137678	-0.157989	-0.00166368	-0.0835454	0.0261025	0.0212795	-0.0340338	-0.0630988	0.22824	-0.0583568	0.0596992	-0.0222496	-0.0223598	-0.0480497	3	3	1	16.3	16.3	6.2	20.471	0	4.6601	51696000	4
CBFB	Core-binding factor subunit beta	Q13951-2;Q13951	Q13951-2;Q13951		-0.0705088	0.030464	0.105795	-0.0594417	-0.0468917	-0.0549454	-0.117377	0.121101	-0.00790966	0.0649499	0.0362334	0.094949	-0.0136866	0.0288407	-0.13721	-0.00392475	0.0311792	0.0157939	0.021044	-0.0948235	7	7	7	35.3	35.3	35.3	21.991	0	22.857	366070000	13
CBR1	Carbonyl reductase [NADPH] 1	P16152;P16152-2	P16152;P16152-2		0.0527579	-0.0455996	-0.00755787	0.0243979	-0.00850201	-0.0154085	-0.0140524	-0.0671638	0.0661789	-0.0251251	0.0629508	-0.0586191	-0.0196427	-0.0149677	0.019076	-0.0248644	0.0168479	-0.0292533	0.0301699	0.00200796	15	15	13	72.9	72.9	62.5	30.375	0	88.603	1707700000	108
CBR3	Carbonyl reductase [NADPH] 3	O75828	O75828		0.0292969	-0.0602477	0.324963	-0.0404838	-0.000864603	-0.0441041	-0.249736	0.170862	0.0533915	-0.0628483	0.165515	-0.150918	-0.0130324	0.0372854	-0.691235	-0.0731646	0.0255028	0.0129061	0.293103	0.21744	5	3	3	28.5	18.1	18.1	30.85	0	4.3408	120380000	10
CBS	Cystathionine beta-synthase	P0DN79;P35520;P35520-2	P0DN79;P35520;P35520-2		-0.139087	-0.00530738	-0.00771457	-0.338323	0.0576491	0.0176569	0.170582	0.0084967	0.113844	0.147941	0.0537323	-0.181099	0.112978	-0.570343	-0.39438	0.22755	0.15833	0.083624	0.330241	0.0972598	3	3	3	6.5	6.5	6.5	60.586	0	11.781	65554000	8
CBWD1;CBWD3;CBWD2;CBWD5;CBWD6	COBW domain-containing protein 1;COBW domain-containing protein 3;COBW domain-containing protein 2;COBW domain-containing protein 5;COBW domain-containing protein 6	Q9BRT8-2;Q9BRT8-3;Q9BRT8;Q5JTY5-2;Q8IUF1;Q5RIA9;Q5JTY5;Q4V339	Q9BRT8-2;Q9BRT8-3;Q9BRT8;Q5JTY5-2;Q8IUF1;Q5RIA9;Q5JTY5;Q4V339		0.0530606	-0.154748	0.213066	-0.602273	0.144183	0.40713	0.416505	0.677185	0.137291	-0.184364	0.131483	-0.230292	-0.193356	-0.501923	-0.804537	0.057302	0.260167	0.00984579	-0.465877	0.573784	2	2	2	5	5	5	40.42	0.00086881	2.8163	28361000	4
CBX1	Chromobox protein homolog 1	P83916	P83916		-0.226301	0.600244	-0.117543	-0.0254	0.0502148	0.0986205	0.112084	0.368415	-0.233376	0.0469564	-0.0608627	0.178446	0.00382433	0.233735	0.025253	-0.137238	-0.296214	-0.300419	-0.0964055	-0.280403	6	6	6	45.9	45.9	45.9	21.418	0	14.435	660520000	23
CBX3	Chromobox protein homolog 3	Q13185	Q13185		-0.086314	0.288889	-0.0216992	-0.106166	0.00311051	0.134334	0.0669028	0.240868	-0.222221	0.0672846	-0.0887008	0.275691	0.00345774	0.222334	0.164215	-0.0739789	-0.256263	-0.177326	-0.209939	-0.280848	8	8	7	48.6	48.6	42.1	20.811	0	81.542	2553700000	88
CBX5	Chromobox protein homolog 5	P45973	P45973		-0.0113449	0.170727	0.0537432	0.0493106	0.0364212	0.0919957	0.045862	0.0703769	-0.0604076	0.119273	0.000464916	0.180685	-0.0214992	0.158081	0.0655674	-0.0929674	-0.24314	-0.262821	-0.204295	-0.202403	6	5	5	31.4	25.1	25.1	22.225	0	25.454	303970000	14
CC2D1A	Coiled-coil and C2 domain-containing protein 1A	Q6P1N0-2;Q6P1N0	Q6P1N0-2;Q6P1N0		-0.0328058	-0.052282	0.0419495	-0.0218932	0.00180434	0.0334044	0.0663864	0.0265454	-0.0200943	0.0167383	-0.0648957	0.0449454	0.0167886	-0.00633889	-0.196589	0.0524683	0.0342734	-0.0142025	-0.00302257	0.0204504	10	10	10	13.3	13.3	13.3	103.93	0	49.542	297730000	25
CCAR1	Cell division cycle and apoptosis regulator protein 1	Q8IX12-2;Q8IX12	Q8IX12-2;Q8IX12		-0.107429	-0.0605906	-0.0971494	-0.0228638	-0.0294839	0.0346345	-0.0663333	0.0998909	0.0626817	0.0340074	-0.068569	0.118464	0.0444269	-0.00586122	0.0478297	-0.0410487	0.0168611	-0.0119614	0.0297202	-0.0335951	7	7	7	6.9	6.9	6.9	131.04	0	14.75	239620000	18
CCAR2	Cell cycle and apoptosis regulator protein 2	Q8N163;Q8N163-2	Q8N163;Q8N163-2		0.0268184	-0.0294868	0.0262995	0.0155622	0.00956296	-0.0478119	0.0440712	-0.0361131	0.0239412	-0.0371161	-0.0128568	-0.0483585	-0.00918045	-0.0196488	-0.00737327	-0.00718518	0.0388191	0.0213882	-0.00378857	-0.00391245	19	19	19	27.8	27.8	27.8	102.9	0	94.812	872410000	69
CCBL2	Kynurenine--oxoglutarate transaminase 3	Q6YP21-3;Q6YP21;Q6YP21-2	Q6YP21-3;Q6YP21		-0.0437943	0.0971994	-0.166742	0.111541	-0.0546582	0.0503595	0.0692461	0.044661	-0.386875	0.0577432	-0.304476	0.0875724	0.0940044	-0.090768	0.064937	0.14829	0.110165	0.14391	0.119666	-0.208351	6	6	6	16.2	16.2	16.2	47.752	0	11.128	101720000	12
CCDC117	Coiled-coil domain-containing protein 117	Q8IWD4-3;Q8IWD4;Q8IWD4-2;Q8IWD4-4	Q8IWD4-3;Q8IWD4;Q8IWD4-2;Q8IWD4-4		-0.0216152	0.0265574	-0.39481	-0.134449	0.182465	0.0607216	0.330046	-0.165592	-0.0322125	0.107218	-0.0659893	0.368014	-0.0292689	-0.220549	-0.123194	0.135759	0.0297646	-0.125795	0.048356	-0.0317955	2	2	2	9.2	9.2	9.2	28.348	0	5.0914	32420000	4
CCDC124	Coiled-coil domain-containing protein 124	Q96CT7	Q96CT7		-0.175891	0.239641	-0.134562	-0.139153	-0.0227118	0.057622	0.0374183	0.330719	-0.145584	0.129815	-0.0934299	0.190728	-0.0450238	0.24178	0.0813851	-0.16851	-0.179943	-0.122418	-0.0639646	-0.0742851	13	13	13	52.5	52.5	52.5	25.835	0	67.396	1695500000	78
CCDC134	Coiled-coil domain-containing protein 134	Q9H6E4	Q9H6E4		0.0714948	-0.108544	0.344091	-0.276582	-0.0859298	0.189088	-0.579678	-0.132337	0.0284526	0.0819974	0.273919	0.176163	0.0635778	-0.381186	0.376309	-0.141717	0.102651	0.0156839	-0.142867	0.0690435	5	5	5	27.5	27.5	27.5	26.56	0	7.6216	49571000	7
CCDC137	Coiled-coil domain-containing protein 137	Q6PK04	Q6PK04		-0.163996	0.105128	0.165882	0.0784194	-0.165556	-0.0834253	-0.25805	0.155982	-0.0103734	0.184409	0.375128	0.20667	0.0631106	0.211434	0.320906	-1.85605	-0.0585389	-0.104906	0.0429544	0.734505	3	3	3	9.7	9.7	9.7	33.231	0.00059524	3.1109	19107000	4
CCDC22	Coiled-coil domain-containing protein 22	O60826	O60826		-0.0429564	-0.0537218	-0.110567	0.189305	-0.151344	0.0721677	-0.000848979	-0.160502	0.0443743	0.00333185	0.0638433	-0.0774963	0.0123438	0.0282273	-0.0759655	0.0653482	0.11311	-0.0482474	-0.00242214	0.0756506	7	7	7	16.1	16.1	16.1	70.755	0	15.467	87807000	16
CCDC43	Coiled-coil domain-containing protein 43	Q96MW1;Q96MW1-2	Q96MW1;Q96MW1-2		-0.139432	0.324007	-0.178733	-0.0694007	-0.0624927	-0.0832798	0.0527964	0.258237	-0.158461	-0.00556936	-0.132662	0.249676	-0.0184032	0.204783	-0.00208706	-0.131078	0.0158119	-0.0996786	0.0112461	-0.0916495	4	4	4	16.5	16.5	16.5	25.248	0	17.507	309330000	14
CCDC47	Coiled-coil domain-containing protein 47	Q96A33;Q96A33-2	Q96A33;Q96A33-2		-0.024387	-0.0823631	0.00627641	-0.0337206	-0.0680468	0.106401	-0.0344464	0.0981073	-0.0560404	-0.00728779	-0.0152493	0.12268	-0.0357114	0.166671	-0.0196868	-0.036579	-0.0405349	0.0185847	-0.0452912	-0.0757458	10	10	10	22.4	22.4	22.4	55.873	0	24.088	246650000	15
CCDC50	Coiled-coil domain-containing protein 50	Q8IVM0;Q8IVM0-2	Q8IVM0;Q8IVM0-2		-0.178423	0.291978	-0.235269	-0.105779	0.00120468	0.0524189	0.046398	0.417624	-0.15889	0.0998417	-0.173867	0.299505	-0.0095851	0.232375	0.152541	-0.0719341	-0.188759	-0.164876	-0.0996244	-0.263249	6	6	6	19.9	19.9	19.9	35.822	0	14.42	274780000	23
CCDC6	Coiled-coil domain-containing protein 6	Q16204	Q16204		-0.0521489	0.209514	-0.00146133	-0.0309832	-0.0140378	0.124971	0.0502593	0.129305	-0.082389	0.0146234	-0.0203195	0.161509	-0.00224743	-0.0219503	0.103612	-0.1486	-0.114205	-0.0848446	-0.137389	-0.139587	9	9	9	19.6	19.6	19.6	53.29	0	25.865	428260000	36
CCDC86	Coiled-coil domain-containing protein 86	Q9H6F5;Q9H6F5-2	Q9H6F5;Q9H6F5-2		-0.334204	0.216857	-0.248747	-0.292967	0.021876	-0.0854419	0.218161	0.224886	-0.36323	-0.0343227	-0.181812	0.164035	0.229685	0.592503	0.403935	-0.119994	-0.210466	-0.0559719	-0.141421	-0.0597306	6	6	6	18.6	18.6	18.6	40.235	0	36.379	472390000	23
CCDC9	Coiled-coil domain-containing protein 9	Q9Y3X0	Q9Y3X0		-0.264983	0.515047	-0.212087	-0.113226	-0.0207436	0.102812	0.17805	0.376902	-0.187614	-0.0934074	-0.151132	-0.22244	-0.022441	0.310792	0.138476	0.0968962	-0.311104	-0.0510726	-0.199665	0.0745714	3	3	3	7.2	7.2	7.2	59.702	0	11.821	53259000	5
CCDC97	Coiled-coil domain-containing protein 97	Q96F63	Q96F63		-0.0566175	0.128496	0.0815966	-0.151746	-0.0558056	0.0999476	-0.133179	0.115443	-0.132979	0.0999222	-0.110929	0.230426	-0.0711444	0.167486	-0.0754597	0.0174599	-0.0762645	-0.125755	-0.0308565	0.0235898	8	8	8	30.6	30.6	30.6	38.946	0	20.5	184480000	17
CCNB1	G2/mitotic-specific cyclin-B1	P14635-2;P14635	P14635-2;P14635		0.0817988	-0.173261	-0.0876982	-0.0871325	-0.00832405	-0.0538553	-0.0396616	0.0690503	-0.00871062	-0.127295	0.00273275	-0.104048	-0.00283556	-0.15687	-0.026692	-0.0350594	0.195916	0.230723	0.145404	0.129449	4	4	4	9.8	9.8	9.8	44.102	0	9.238	221450000	10
CCNB2	G2/mitotic-specific cyclin-B2	O95067	O95067		-0.0669771	-0.0264558	-0.169075	-0.0279865	0.0188425	-0.0739042	0.105131	0.285773	-0.0170704	-0.000843812	-0.231025	-0.0443541	-0.0319797	0.132715	-0.0373626	-0.210938	0.0290251	0.0139336	0.253479	0.042703	2	2	2	4.5	4.5	4.5	45.281	0.0044584	1.9335	41541000	3
CCNK	Cyclin-K	O75909-1;O75909;O75909-4;O75909-2	O75909-1;O75909;O75909-4;O75909-2		0.109346	-0.137011	0.0940239	0.0726398	0.276384	-0.144232	-0.298242	0.00277132	0.0906532	0.100223	0.373913	0.0241973	0.315018	-0.943333	-0.00757998	-0.489174	0.225531	0.0847062	-0.167934	0.36173	3	3	3	13.7	13.7	13.7	41.293	0	10.667	83532000	9
CCS	Copper chaperone for superoxide dismutase	O14618	O14618		-0.379007	0.326722	-0.479806	0.0184824	-0.384585	-0.236371	-0.127032	0.445977	-0.593384	0.303418	-0.487454	0.189847	0.225711	0.55258	0.410658	-0.00117598	0.15634	0.00586181	0.297315	-0.300466	2	2	2	8	8	8	29.04	0.00030562	3.3943	25028000	5
CCT2	T-complex protein 1 subunit beta	P78371;P78371-2	P78371;P78371-2		0.0275787	0.0454322	0.0343034	0.0052679	-0.00448532	-0.0407917	-0.000227273	-0.0163522	-0.00550139	-0.0364283	0.00403732	0.000475109	-0.0253573	0.0385579	0.00900009	0.00737047	-0.0165386	-0.00518087	-0.0185641	-0.0589654	34	34	34	71.4	71.4	71.4	57.488	0	323.31	9991300000	315
CCT3	T-complex protein 1 subunit gamma	P49368;P49368-2	P49368;P49368-2		0.0441901	-0.010718	0.0648637	0.0150362	0.0130472	-0.0152959	0.0106416	-0.0794676	0.00277293	-0.025909	0.0134737	-0.0279799	-0.00932779	-0.0102776	-0.0202426	0.00724725	-0.00708362	-0.00411258	-0.00368033	-0.0135469	31	31	30	56	56	53.2	60.533	0	190.36	7982600000	321
CCT4	T-complex protein 1 subunit delta	P50991;P50991-2	P50991;P50991-2		-0.0427368	0.0366783	-0.0036561	0.0497936	-0.0285229	0.00802007	-0.00173733	-0.0422382	-0.0292051	-0.017581	-0.0132618	-0.0190041	-0.0265811	0.0628622	0.000678897	0.0120173	-0.0106346	0.0249865	0.0246036	-0.0408508	28	28	28	55.7	55.7	55.7	57.924	0	181.36	10580000000	278
CCT5	T-complex protein 1 subunit epsilon	P48643;P48643-2	P48643;P48643-2		0.0556898	-0.0123675	0.0739541	0.01994	0.0125593	-0.0513254	0.0403447	-0.073942	0.00619888	-0.0411446	-0.0149744	-0.0487833	0.0316329	-0.0187058	-0.0100955	0.024339	-0.04116	0.0359078	-0.0194884	-0.0249491	27	27	27	50.5	50.5	50.5	59.67	0	175.55	7492900000	260
CCT6A	T-complex protein 1 subunit zeta	P40227;P40227-2	P40227;P40227-2		0.094266	-0.0877097	0.0305007	0.0435127	0.021438	-0.003161	-0.00675365	-0.0950203	0.06357	-0.0464508	0.0241604	-0.0736229	-0.0103745	-0.0718159	-0.0283242	0.0217582	0.0204035	-0.00288004	0.0121409	0.0379933	23	23	18	44.3	44.3	36.7	58.024	0	140.82	5682100000	199
CCT7	T-complex protein 1 subunit eta	Q99832;Q99832-3;Q99832-4;Q99832-2	Q99832;Q99832-3;Q99832-4;Q99832-2		0.0733198	-0.0812377	0.0255399	-0.00288142	0.0122736	-0.0477563	-0.00368834	-0.0488127	0.0724701	-0.0432079	0.0209829	-0.0146055	-0.0275479	-0.00111586	-0.00804514	-0.00187559	0.00689033	0.0131974	0.0116242	-0.0118933	29	29	29	56.4	56.4	56.4	59.366	0	197.21	9443300000	309
CCT8	T-complex protein 1 subunit theta	P50990;P50990-2;P50990-3	P50990;P50990-2;P50990-3		0.0665185	-0.0672242	0.0449347	0.0201794	-0.000318535	-0.0509185	-0.0243936	-0.085244	0.0674692	-0.0217978	0.0411236	-0.0547791	-0.0130481	-0.0481375	-0.0173864	0.00207929	0.0272267	0.0175158	0.0219153	0.0179157	39	39	39	72.3	72.3	72.3	59.62	0	323.31	13961000000	482
CD151	CD151 antigen	P48509	P48509		-0.0596153	0.0461058	-0.0446527	-0.0309397	-0.0957611	-0.0932672	-0.109687	0.0215006	0.148939	-0.00622883	0.147406	0.129597	-0.0139653	-0.0151812	-0.224836	0.00602445	0.0108027	0.055457	0.00584765	0.0660847	3	3	3	10.7	10.7	10.7	28.295	0	5.4801	153360000	13
CD276	CD276 antigen	Q5ZPR3;Q5ZPR3-4;Q5ZPR3-2;Q5ZPR3-3	Q5ZPR3;Q5ZPR3-4;Q5ZPR3-2;Q5ZPR3-3		0.0582447	-0.0620216	0.0352507	-0.522304	-0.0122849	0.0683026	-0.328511	0.47681	0.0220976	0.0552729	0.215139	0.21528	0.0259004	-0.088324	-0.0671009	0.0270575	-0.0643218	-0.0255804	-0.130451	0.0451741	6	6	6	15.9	15.9	15.9	57.235	0	11.817	144780000	12
CD2AP	CD2-associated protein	Q9Y5K6	Q9Y5K6		-0.0130512	0.0729412	-0.00771171	-0.0261566	0.0133984	0.0411694	-0.0265248	-0.0166393	-0.0258486	0.0178991	0.0439171	0.0742857	-0.0107009	-0.00325459	0.0335553	-0.0381474	-0.0460639	-0.0692035	-0.0695113	-0.000721693	15	15	15	26.4	26.4	26.4	71.45	0	48.365	650360000	48
CD2BP2	CD2 antigen cytoplasmic tail-binding protein 2	O95400	O95400		0.0246738	0.0772104	-0.0115252	0.0671235	-0.00635844	0.0803277	0.021843	0.0463102	-0.0208614	0.0274211	-0.0613034	0.128708	-0.0661604	0.00612432	0.107338	-0.127001	-0.0944777	-0.050614	-0.0902029	-0.114945	5	5	5	19.6	19.6	19.6	37.646	0	16.746	306810000	33
CD44	CD44 antigen	P16070-18;P16070-12;P16070-14;P16070-13;P16070-11;P16070-10;P16070-16;P16070-8;P16070-17;P16070-6;P16070-4;P16070-3;P16070-7;P16070-5;P16070;P16070-15;P16070-9;P16070-19	P16070-18;P16070-12;P16070-14;P16070-13;P16070-11;P16070-10;P16070-16;P16070-8;P16070-17;P16070-6;P16070-4;P16070-3;P16070-7;P16070-5;P16070;P16070-15;P16070-9		0.0721327	0.0609639	0.121345	0.0145191	0.0263176	-0.0125465	0.0821622	-0.050766	0.0745417	-0.0292698	0.0778732	-0.0692761	-0.13856	-0.070072	-0.099084	-0.0706052	-0.0254419	0.01922	0.0439431	-0.0837662	6	6	6	20	20	20	37.277	0	15.727	162190000	12
CD47	Leukocyte surface antigen CD47	Q08722-2;Q08722-3;Q08722-4;Q08722	Q08722-2;Q08722-3;Q08722-4;Q08722		0.085362	0.0509092	-0.0105021	-0.087515	-0.0659762	-0.00172715	-0.18488	-0.194227	-0.0144296	-0.07884	0.149041	0.285882	-0.0523129	0.113875	0.121539	-0.0791258	-0.0730484	0.0134731	-0.0540855	0.0202172	2	2	2	6.8	6.8	6.8	31.742	0	5.2045	85162000	10
CD59	CD59 glycoprotein	P13987	P13987		0.0321223	0.0241703	-0.0110056	-0.0431386	0.0601874	0.0964614	0.0358513	-0.024591	-0.0147526	-0.0497346	0.00841093	0.193195	-0.0786303	-0.0490739	-0.0082289	-0.0960764	-0.0432355	-0.000229113	0.0449173	-0.132989	3	3	3	25	25	25	14.177	0	9.1265	186010000	16
CD81	CD81 antigen	P60033	P60033		-0.0369863	0.113477	-0.191375	-0.526286	-0.0138498	-0.114103	0.0856793	0.0568199	0.226531	0.0224722	0.18768	-0.0906651	0.240172	-0.524804	0.302335	-0.0110301	0.0534703	0.0109053	0.0935151	0.0596722	2	2	2	15.3	15.3	15.3	25.809	0	29.579	139850000	17
CD99	CD99 antigen	P14209-3;P14209	P14209-3;P14209		0.132116	0.461547	-0.000103861	-0.094467	-0.0467591	0.312749	-0.369945	0.54319	-0.11878	0.0710115	-0.128069	0.490549	-0.0677561	-0.364253	-0.00349456	-0.142333	-0.12599	-0.276601	-0.164577	-0.164403	2	2	2	14.2	14.2	14.2	17.128	0	29.882	314560000	17
CDC123	Cell division cycle protein 123 homolog	O75794	O75794		0.0375142	-0.137572	0.00581874	0.31477	0.0862264	-0.0542679	-0.0122209	-0.246495	0.0612283	0.00749998	0.0126306	-0.0472489	-0.00489616	-0.064229	-0.130201	0.069134	0.0416042	0.00417762	0.0729082	-0.0727502	5	5	5	19.9	19.9	19.9	39.134	0	9.7709	84015000	9
CDC16	Cell division cycle protein 16 homolog	Q13042-4;Q13042-3;Q13042-2;Q13042	Q13042-4;Q13042-3;Q13042-2;Q13042		0.0713703	-0.299086	0.0393123	-0.185756	-0.0162168	0.00127368	-0.0466672	0.14669	-0.0119284	0.0242147	0.148634	-0.221093	-0.0228399	-0.0944808	0.0677857	0.0831849	0.21461	0.110369	0.108694	-0.17444	5	5	5	9.9	9.9	9.9	60.37	0	10.834	96812000	11
CDC23	Cell division cycle protein 23 homolog	Q9UJX2;Q9UJX2-3;Q9UJX2-2	Q9UJX2;Q9UJX2-3		-0.0277413	0.138466	-0.00624028	0.107455	0.0180888	-0.0660567	-0.0105976	0.0441955	-0.0671233	0.0140018	-0.0734536	0.242797	-0.106861	0.182283	-0.0757445	0.0258955	0.00879458	-0.116567	-0.114244	-0.173717	5	5	5	7.9	7.9	7.9	68.833	0	7.945	116880000	9
CDC25C	M-phase inducer phosphatase 3	P30307-4;P30307-3;P30307-2;P30307	P30307-4;P30307-3;P30307-2;P30307		-0.06123	-0.00449723	-0.198153	0.373013	0.162127	0.0911255	0.145432	0.513681	-0.0447458	0.137548	-0.319022	-0.0464983	0.238179	-0.147754	-0.541059	-0.153539	-0.133993	-0.259474	0.176823	0.0156689	3	3	3	10.2	10.2	10.2	45.607	0	6.1774	22012000	5
CDC27	Cell division cycle protein 27 homolog	P30260;P30260-2	P30260;P30260-2		-0.0300114	0.0795245	-0.0235465	0.116537	0.091282	-0.0368088	-0.043999	0.0628513	-0.00866342	-0.0262485	0.194098	-0.409673	-0.0184429	-0.0142419	0.221444	-0.0387778	-0.0213811	-0.0377228	-0.240312	0.127723	10	10	10	13.5	13.5	13.5	91.866	0	19.21	191980000	19
CDC34	Ubiquitin-conjugating enzyme E2 R1	P49427	P49427		0.0764418	0.0190408	0.0506152	-0.0886831	-0.0774408	0.104313	-0.0467206	0.0149218	0.0566683	-0.0528013	-0.0419639	-0.00388584	-0.0970187	-0.00609154	0.0574794	0.0254151	-0.0635885	0.0177622	0.023557	-0.0243898	5	5	3	18.2	18.2	10.6	26.736	0	4.4383	140420000	9
CDC37	Hsp90 co-chaperone Cdc37;Hsp90 co-chaperone Cdc37, N-terminally processed	Q16543	Q16543		-0.0481974	0.00731939	-0.00721417	-0.0308194	-0.0199721	0.0103357	-0.0203491	0.108112	0.0266593	0.0571815	0.0164996	0.108391	0.0274179	-0.0127584	0.0042305	-0.0594433	-0.0957918	0.0250915	-0.0795824	-0.0734788	16	16	16	44.7	44.7	44.7	44.468	0	70.014	1203500000	72
CDC42	Cell division control protein 42 homolog	P60953;P60953-1;Q9H4E5-2;P17081;Q9H4E5	P60953;P60953-1		0.0594725	-0.0622482	0.035287	0.00381012	0.0225428	-0.0981409	0.0385848	-0.113376	0.0283054	0.00161095	0.0131271	-0.0430359	0.0121097	-0.0553685	-0.0176023	-0.00952921	0.00242713	0.0665745	0.0366359	0.0224434	9	9	8	48.2	48.2	42.4	21.258	0	44.439	2634800000	92
CDC5L	Cell division cycle 5-like protein	Q99459	Q99459		-0.086636	-0.0620478	-0.115946	-0.055493	-0.0241624	0.0203638	-0.107772	0.156498	0.0550456	0.0348819	0.00253201	0.0312097	0.103527	-0.0924863	-0.031438	-0.0196389	0.0097734	0.0190263	0.0182559	0.0881366	20	20	20	30.3	30.3	30.3	92.25	0	67.05	588820000	61
CDC73	Parafibromin	Q6P1J9	Q6P1J9		-0.0364469	0.000598252	-0.123141	-0.0526512	-0.067729	-0.069415	-0.0324449	-0.00238913	-0.0679067	0.0771679	-0.0246755	0.0559374	-0.00847235	0.0492861	0.0919625	-0.0283595	0.0212176	0.0789858	0.00815821	0.0739485	13	13	12	25	25	23.5	60.576	0	18.039	236320000	22
CDH2	Cadherin-2	P19022-2;P19022;P55283-2;P55283	P19022-2;P19022		0.063625	-0.0481278	0.149336	-0.101241	-0.00755883	0.118289	0.0481397	-0.519508	0.0821406	-0.0228106	0.178692	-0.184426	0.0800878	-0.698777	-0.0589517	-0.163493	0.132906	0.277511	0.33531	0.282488	6	6	6	11.4	11.4	11.4	97.039	0	8.774	78299000	10
CDK1	Cyclin-dependent kinase 1	P06493;P06493-2;Q00526	P06493;P06493-2		0.080244	-0.0540614	0.109978	0.00500755	0.0151446	0.00897631	-0.00453693	-0.12446	0.0620373	-0.0329612	0.0557656	-0.109523	-0.0319305	-0.0599599	-0.029184	0.0575156	-0.00139853	-0.00880531	-0.0218076	0.0275891	14	14	12	55.2	55.2	48.8	34.095	0	133.72	1971700000	114
CDK11B;CDK11A	Cyclin-dependent kinase 11B;Cyclin-dependent kinase 11A	P21127-8;P21127-3;P21127-2;P21127;P21127-6;P21127-9;P21127-12;P21127-4;P21127-5;P21127-10;Q9UQ88-4;Q9UQ88-3;Q9UQ88-2;Q9UQ88;Q9UQ88-5;Q9UQ88-10;Q9UQ88-9;Q13882	P21127-8;P21127-3;P21127-2;P21127;P21127-6;P21127-9;P21127-12;P21127-4;P21127-5;P21127-10;Q9UQ88-4;Q9UQ88-3;Q9UQ88-2;Q9UQ88;Q9UQ88-5;Q9UQ88-10		-0.0281712	-0.0360327	0.0926562	0.0721647	0.0219151	-0.0257761	-0.0973653	-0.199238	0.000595331	-0.0817794	0.121185	-0.0634979	0.0162466	0.0845297	-0.0937513	0.0060853	0.0309524	-0.00519433	0.037621	0.0904852	9	9	7	10.8	10.8	8.7	90.227	0	13.194	180050000	19
CDK12	Cyclin-dependent kinase 12	Q9NYV4-2;Q9NYV4;Q9NYV4-3;Q96Q40-6;Q96Q40-4;Q96Q40-3;O94921-3;Q96Q40-5;Q96Q40;O94921-2;O94921;Q07002;Q07002-3;Q14004-2;Q14004	Q9NYV4-2;Q9NYV4;Q9NYV4-3		0.0677025	-0.273488	0.125753	0.0311081	0.104985	-0.330988	-0.37128	0.0427893	0.0223334	0.173717	-0.0277998	0.208023	0.214612	-0.229603	0.0871941	-0.0103885	0.0601881	0.167828	-0.171516	0.0524622	4	3	3	3.8	3.3	3.3	163.23	0	10.873	43920000	6
CDK2	Cyclin-dependent kinase 2	P24941-2;P24941	P24941-2;P24941		0.0429727	-0.105762	0.00128278	0.0179245	0.0174985	-0.020472	0.0672265	-0.0368854	0.0732061	-0.0389453	-0.117227	-0.147317	-0.0867094	0.163889	0.0492265	0.182218	0.0382974	-0.106689	0.00153685	-0.0516409	5	3	3	20.1	12.9	12.9	30.035	0	12.503	91843000	8
CDK2AP1;CDK2AP2	Cyclin-dependent kinase 2-associated protein 1;Cyclin-dependent kinase 2-associated protein 2	O14519-2;O14519;O75956	O14519-2;O14519;O75956		-0.0299577	0.00943631	-0.0447941	-0.112056	-0.136972	0.0147423	-0.13725	0.0234449	0.00181484	-0.0114023	0.00378674	0.244731	-0.00164366	0.0580927	0.0454756	0.00164108	0.0121714	0.0610037	0.0206598	-0.0792947	3	3	3	50.6	50.6	50.6	9.6008	0	4.0777	90420000	5
CDK4	Cyclin-dependent kinase 4	P11802;P11802-2	P11802;P11802-2		-0.0243138	-0.0479376	-0.0122665	0.0357654	0.11201	0.123383	0.0298162	-0.0248792	0.0488569	-0.0152112	0.0347484	-0.12904	-0.0619625	-0.130425	0.0774366	0.0595736	-0.0299914	0.00287738	-0.0314808	-0.0733289	7	6	6	30.7	28.1	28.1	33.729	0	13.352	120970000	11
CDK5	Cyclin-dependent-like kinase 5	Q00535;Q00535-2	Q00535;Q00535-2		0.111084	-0.294165	0.0171242	0.412212	0.0650794	0.0392358	0.0215044	-0.0503781	0.0878346	-0.0262317	0.173777	-0.323075	-0.133928	0.118847	-0.655334	0.108643	0.0377845	-0.0282551	0.152617	0.109254	5	4	4	19.2	16.4	16.4	33.304	0	10.21	78601000	7
CDK5RAP3	CDK5 regulatory subunit-associated protein 3	Q96JB5-2;Q96JB5;Q96JB5-4;Q96JB5-3	Q96JB5-2;Q96JB5;Q96JB5-4;Q96JB5-3		-0.00801256	-0.0770455	0.0386758	0.0542952	0.021298	-0.148356	0.0695519	-0.0259045	-0.143208	-0.0490761	-0.0190008	-0.0261974	0.0275619	0.306273	-0.0370082	-0.0200669	-0.0352632	0.0831139	-0.0764848	0.00848484	9	9	9	22	22	22	46.35	0	20.989	346440000	25
CDK6	Cyclin-dependent kinase 6	Q00534	Q00534		-0.0595476	0.0821852	-0.0521068	-0.111477	0.115735	-0.0450256	-0.133932	-0.0923674	0.0306299	-0.0144648	0.261399	-0.0905022	-0.123744	0.073293	0.0139844	0.0278958	-0.0302015	-0.0515748	0.0513043	0.0921465	3	2	2	11	8.6	8.6	36.938	0.00058858	2.9886	33064000	7
CDK9	Cyclin-dependent kinase 9	P50750;P50750-2	P50750;P50750-2		0.418705	-0.0583084	-0.0355228	-0.068784	-0.257151	0.119998	-0.14742	0.11511	0.407836	-0.269323	-0.247429	-0.0613002	-0.200027	-0.818121	0.133608	-0.00104199	0.224445	0.409232	-0.0659933	0.345119	4	3	3	12.9	10.8	10.8	42.777	0	13.441	76684000	5
CDKAL1	Threonylcarbamoyladenosine tRNA methylthiotransferase	Q5VV42-2;Q5VV42	Q5VV42-2;Q5VV42		-0.054236	0.0791598	-0.134634	0.414669	-0.0702383	-0.255361	0.0899608	0.558155	0.0280222	0.020673	-0.322081	0.516973	0.0644206	0.0655298	-0.629043	-0.275988	-0.0248928	0.124208	-0.171469	-0.080198	4	4	4	8.6	8.6	8.6	54.666	0	6.957	37077000	6
CDKN2A	Cyclin-dependent kinase inhibitor 2A	P42771;P42771-4;P42771-2;P42771-3;P42772	P42771;P42771-4;P42771-2		-0.187059	0.173963	-0.108542	-0.0359056	0.0443108	0.0874436	-0.0219544	0.39205	-0.19227	0.105708	-0.0723736	-0.0125183	0.00367956	0.141274	0.0996053	-0.077941	-0.114801	-0.0849639	-0.232142	0.0360676	6	6	6	52.6	52.6	52.6	16.532	0	46.975	1367100000	59
CDKN2AIP	CDKN2A-interacting protein	Q9NXV6	Q9NXV6		-0.0830849	-0.247262	0.203241	0.0509295	-0.178223	0.147002	-0.19312	0.133849	0.0754606	0.183042	-0.125409	-0.222872	-0.17091	0.254461	-0.173865	-0.220447	0.164308	-0.167508	0.235641	0.278398	4	4	3	11.4	11.4	9.1	61.124	0	8.9199	49462000	6
CDKN2C	Cyclin-dependent kinase 4 inhibitor C	P42773	P42773		-0.161784	0.35019	-0.0439917	-0.215869	-0.0041895	-0.0431375	0.0846132	0.194284	-0.210189	0.0239929	-0.136279	0.226041	0.0891858	0.192899	0.0117397	0.0546343	-0.142666	-0.117017	-0.0697224	-0.139104	5	5	5	24.4	24.4	24.4	18.127	0	11.061	196800000	15
CDS2	Phosphatidate cytidylyltransferase 2	O95674	O95674		-0.0880581	-0.150925	-0.659672	-0.0819046	0.0088088	0.164897	0.818014	-0.496424	-0.275323	-0.134241	-0.393128	-0.229508	0.166383	0.080221	0.0917046	0.515005	0.130469	0.0750536	0.215007	0.187252	2	2	2	6.5	6.5	6.5	51.417	0	6.586	31314000	5
CDV3	Protein CDV3 homolog	Q9UKY7-2;Q9UKY7;Q9UKY7-3	Q9UKY7-2;Q9UKY7		-0.237281	0.529314	-0.0832456	-0.0362465	0.0178178	-0.0775115	0.132682	0.240618	-0.386252	0.0247371	-0.245899	0.32237	-0.00718174	0.516932	0.176174	-0.0550504	-0.374456	-0.0288334	-0.136184	-0.348874	9	9	9	66.7	66.7	66.7	22.079	0	98.527	1481000000	53
CECR5	Cat eye syndrome critical region protein 5	Q9BXW7-2;Q9BXW7	Q9BXW7-2;Q9BXW7		-0.0330196	0.0855303	-0.0300571	-0.0484982	-0.016844	0.036476	-0.0519983	0.00659227	-0.036965	-0.0526026	0.011991	0.00141552	-0.04381	0.0627937	0.0565523	0.0200916	-0.0511121	0.0268387	0.0498039	-0.0495479	3	3	3	8.1	8.1	8.1	43.588	0	15.849	137010000	9
CENPV	Centromere protein V	Q7Z7K6-3;Q7Z7K6-2	Q7Z7K6-3		0.104623	-0.265061	-0.271413	-0.283532	0.247	0.231908	0.0461084	-0.320821	0.116584	-0.126657	0.377892	-0.547182	0.056049	-0.402914	0.402885	-0.469926	0.185709	-0.169957	0.497375	0.534958	3	3	1	19.5	19.5	7.7	29.73	0	17.695	28287000	6
CEP131	Centrosomal protein of 131 kDa	Q9UPN4-3;Q9UPN4-2;Q9UPN4	Q9UPN4-3;Q9UPN4-2;Q9UPN4		-0.0965295	0.283153	-0.0939973	-0.4819	-0.0922376	0.0209093	0.223419	0.294117	-0.130424	0.130416	0.34969	-0.195086	-0.0108032	-0.0599727	0.0157187	0.0234761	-0.134958	0.0677324	-0.021057	-0.148035	3	3	3	3	3	3	117.4	0.00059453	3.1068	36761000	3
CEP170	Centrosomal protein of 170 kDa	Q5SW79-2;Q5SW79-3;Q5SW79;Q9Y4F5-3;Q9Y4F5-2;Q9Y4F5	Q5SW79-2;Q5SW79-3;Q5SW79		-0.0531971	0.250928	-0.060505	0.0549183	0.0151655	0.0335362	0.00043574	-0.0365328	-0.0860817	0.0108343	-0.0788463	0.203441	-0.026262	-0.151982	-0.0473247	-0.00317221	-0.0466008	0.0309447	-0.0465371	-0.0195318	9	9	9	6.6	6.6	6.6	161.41	0	15.45	167130000	19
CEP55	Centrosomal protein of 55 kDa	Q53EZ4-2;Q53EZ4	Q53EZ4-2;Q53EZ4		-0.0839576	0.219694	-0.201842	-0.112379	-0.135716	0.121367	0.0467978	0.141308	-0.0689993	-0.0532639	-0.0363886	0.132182	-0.0192208	-0.0609707	0.0305697	-0.113877	0.209661	-0.151308	0.0931401	-0.0131649	2	2	2	5.5	5.5	5.5	46.856	0.00058737	2.9775	47870000	5
CERS2	Ceramide synthase 2	Q96G23	Q96G23		0.083507	-0.101281	-0.0454345	-0.0835632	0.0408829	0.0450629	-0.0777173	0.00458926	-0.0127827	0.0231611	0.0029766	-0.165648	0.0546989	-0.137856	0.0618907	0.0256474	-0.00537488	-0.012733	0.115712	0.127892	3	3	3	8.9	8.9	8.9	44.876	0	10.617	166720000	9
CETN2	Centrin-2	P41208;Q12798	P41208		-0.125878	0.421299	-0.0790117	-0.0140845	-0.0366657	0.199117	0.158456	0.351156	-0.236933	0.151309	-0.14447	0.406725	-0.065829	0.176173	-0.0664656	-0.170664	-0.424474	-0.0808326	-0.331057	-0.144239	3	3	3	19.2	19.2	19.2	19.738	0	6.1954	175500000	18
CETN3	Centrin-3	O15182	O15182		-0.202268	0.483606	-0.0498776	0.00717126	-0.103181	0.0545707	0.0763526	0.40363	-0.26394	0.145435	-0.129245	0.327622	0.0587707	0.262329	0.0986157	-0.167968	-0.328655	-0.129382	-0.26023	-0.339726	2	2	2	12.6	12.6	12.6	19.55	0	4.8923	56458000	7
CFAP20	Cilia- and flagella-associated protein 20	Q9Y6A4	Q9Y6A4		0.160094	-0.0629281	-0.284087	-0.107264	-0.00355262	0.0147532	-0.34427	0.294325	0.172047	0.156292	-0.417179	0.472499	0.00133219	-0.47587	0.35336	-0.0234584	0.00508788	0.0100302	0.22151	-0.199089	5	5	5	24.9	24.9	24.9	22.774	0	9.4652	147360000	14
CFAP36	Cilia- and flagella-associated protein 36	Q96G28;Q96G28-2	Q96G28;Q96G28-2		-0.0822624	0.0219653	-0.433478	-0.0220395	-0.101466	-0.154852	-0.102708	-0.0349374	0.0958258	0.20671	0.0524535	0.753878	0.0411693	-0.0577667	-0.300471	-0.864927	-0.0280626	0.0360247	0.67239	0.246184	3	3	3	11.4	11.4	11.4	39.446	0	10.765	63737000	7
CFDP1	Craniofacial development protein 1	Q9UEE9;Q9UEE9-2	Q9UEE9;Q9UEE9-2		-0.432551	0.384031	-0.167358	-0.165149	-0.123555	-0.0651856	0.0758757	0.376408	-0.437603	0.277797	-0.257525	0.396975	0.0994749	0.519243	0.261353	-0.102216	-0.230555	-0.0138106	-0.0943548	-0.357664	8	8	8	20.7	20.7	20.7	33.592	0	19.376	331920000	23
CFL1	Cofilin-1	P23528	P23528		-0.0140064	0.089323	0.016409	-0.00468425	-0.0568985	-0.034489	0.0116483	0.107532	-0.117912	0.112409	-0.090645	0.121544	0.040157	0.229553	0.0797326	-0.00379095	-0.159057	-0.111793	-0.145145	-0.126256	15	15	13	72.9	72.9	62	18.502	0	148.38	12693000000	212
CFL2	Cofilin-2	Q9Y281;Q9Y281-3	Q9Y281;Q9Y281-3		0.0458123	0.0772461	0.103771	0.0666856	0.0613309	0.00416007	0.0651882	0.0443912	-0.0315392	-0.0255389	-0.0201802	0.145239	0.0590689	0.0216134	0.0492615	-0.0761656	-0.185263	-0.0496046	-0.203871	-0.207975	8	6	6	54.8	44	44	18.736	0	49.27	698680000	29
CHAF1B	Chromatin assembly factor 1 subunit B	Q13112	Q13112		0.00291815	-0.0972876	-0.147219	0.00418358	-0.0280463	-0.0952889	-0.0189031	-0.0974203	0.0289534	0.0629212	0.0667786	0.122703	-0.0454269	0.124218	-0.134944	0.0787101	-0.0318417	0.0561657	-0.0237178	0.116174	4	4	4	8.2	8.2	8.2	61.492	0	9.3899	76113000	7
CHCHD2;CHCHD2P9	Coiled-coil-helix-coiled-coil-helix domain-containing protein 2;Putative coiled-coil-helix-coiled-coil-helix domain-containing protein CHCHD2P9, mitochondrial	Q9Y6H1;Q5T1J5	Q9Y6H1;Q5T1J5		-0.089284	0.054134	-0.159609	-0.136899	-0.0932252	0.0567239	-0.136634	0.0549378	0.00243747	0.0267674	0.26982	0.236684	0.0854887	0.149077	-0.0455796	-0.0478091	-0.115841	-0.0989924	-0.0690831	0.000518084	3	3	3	33.8	33.8	33.8	15.512	0	46.25	291220000	21
CHCHD3	MICOS complex subunit MIC19	Q9NX63	Q9NX63		-0.0840338	0.0703573	-0.0833798	-0.0777635	-0.0303854	-0.0777181	-0.000919342	-0.00160724	-0.0371482	0.0191383	0.0233065	0.0555043	-0.00124674	0.0820168	0.0468498	0.00406913	0.0217932	0.0145123	0.0145907	-0.0143056	11	11	11	46.3	46.3	46.3	26.152	0	56.712	969310000	41
CHD4	Chromodomain-helicase-DNA-binding protein 4	Q14839;Q14839-2;Q8TDI0	Q14839;Q14839-2		-0.0412763	-0.0480906	0.0208842	-0.0754082	-0.0369415	-0.0113506	-0.0216983	0.0201773	0.083099	-0.00146923	0.0330777	0.0638267	-0.0572509	0.0999071	-0.170721	0.0368228	-0.0417802	0.0324389	0.0186807	0.0407031	17	17	13	10.6	10.6	7.6	218	0	58.859	636170000	53
CHERP	Calcium homeostasis endoplasmic reticulum protein	Q8IWX8	Q8IWX8		0.0133666	0.121057	-0.0093092	0.0262744	-0.0368975	0.0910618	0.0679069	0.0556796	-0.0338042	0.0168816	-0.0442149	-0.0177106	0.00634699	-0.0702865	0.00434035	0.0340857	-0.0710054	-0.059435	-0.105263	-0.0454444	10	10	10	11.9	11.9	11.9	103.7	0	19.286	325420000	26
CHID1	Chitinase domain-containing protein 1	Q9BWS9-3;Q9BWS9;Q9BWS9-2	Q9BWS9-3;Q9BWS9;Q9BWS9-2		0.0694339	-0.137914	-0.0523912	-0.0836229	0.0416528	-0.0713414	-0.0299521	0.0816456	0.0463684	0.0853658	-0.0549787	-0.0353733	0.0305082	-0.063008	0.0337348	-0.0334657	0.0521005	-0.0758803	0.0620435	0.0787052	5	5	5	14.9	14.9	14.9	41.677	0	12.671	149030000	16
CHMP1A	Charged multivesicular body protein 1a	Q9HD42;Q9HD42-2	Q9HD42		-0.135054	0.0562304	-0.255447	-0.120154	-0.0988593	-0.128545	-0.127089	0.145956	-0.025524	0.214665	0.0355121	0.237926	0.00810966	0.196144	0.154551	-0.0895421	-0.0779926	-0.0318888	-0.00827418	-0.00709343	4	4	4	17.9	17.9	17.9	21.703	0	8.1699	360350000	13
CHMP1B	Charged multivesicular body protein 1b	Q7LBR1	Q7LBR1		-0.25076	0.46142	-0.105918	-0.0685153	-0.0725837	-0.172227	-0.0317827	0.0878011	-0.382961	0.0974597	-0.222256	0.0536136	-0.0340199	0.275653	0.168463	-0.0033062	0.0463426	0.00896277	0.163791	-0.0755454	2	2	2	8.5	8.5	8.5	22.109	0.00030312	3.3153	197870000	10
CHMP2A	Charged multivesicular body protein 2a	O43633	O43633		-0.0427887	0.00238842	-0.205045	0.133848	0.111132	0.132316	0.0452475	0.246385	0.0193841	0.260861	-0.0474995	0.183221	0.0362123	-0.512888	-0.00927448	0.0410902	-0.0365196	0.0071877	-0.27689	-0.144736	3	3	3	11.7	11.7	11.7	25.104	0	4.1003	87499000	5
CHMP2B	Charged multivesicular body protein 2b	Q9UQN3;Q9UQN3-2	Q9UQN3;Q9UQN3-2		-0.123273	0.181355	-0.0800309	-0.175595	-0.0811497	0.00458951	-0.011889	0.332412	-0.104936	0.160923	-0.0850256	-0.0251541	0.0846419	-0.0183501	0.199905	-0.0830104	-0.147573	0.0210572	-0.300084	0.194817	2	2	2	9.9	9.9	9.9	23.906	0	8.084	108540000	3
CHMP3	Charged multivesicular body protein 3	Q9Y3E7;Q9Y3E7-4;Q9Y3E7-3;Q9Y3E7-2	Q9Y3E7;Q9Y3E7-4;Q9Y3E7-3;Q9Y3E7-2		0.0608248	0.278591	-0.0922403	-0.230853	0.132361	0.23632	0.105204	0.189954	0.00495279	-0.00412159	0.104652	-0.18282	0.0849732	-0.664812	0.0797716	0.0944441	0.0490046	-0.200809	0.011764	-0.113531	4	4	4	16.2	16.2	16.2	25.073	0	6.824	95199000	19
CHMP4A	Charged multivesicular body protein 4a	Q9BY43;Q9BY43-2	Q9BY43;Q9BY43-2		-0.0865671	0.281005	0.00233889	-0.104584	-0.0865524	0.162538	-0.0222211	0.268626	-0.156201	0.184841	0.061702	0.343184	0.0980447	0.172208	0.0563985	-0.137776	-0.466452	-0.125579	-0.375518	-0.125806	6	6	6	31.1	31.1	31.1	25.098	0	17.4	447750000	19
CHMP4B	Charged multivesicular body protein 4b	Q9H444;P59074;Q96CF2	Q9H444		-0.142059	0.357111	0.0238338	-0.136433	-0.0866749	0.359114	0.053184	0.255103	-0.0819632	0.240221	-0.00874215	0.473289	0.0504865	0.0475215	0.17229	-0.277635	-0.541098	-0.225375	-0.474396	-0.114149	8	8	8	35.7	35.7	35.7	24.95	0	40.945	1408200000	57
CHMP5	Charged multivesicular body protein 5	Q9NZZ3;Q9NZZ3-2	Q9NZZ3;Q9NZZ3-2		-0.108033	0.33628	-0.0421793	-0.0649291	-0.0817814	0.365719	0.0510347	0.217113	-0.113601	0.30795	0.0470481	0.433067	0.00613984	0.0746004	0.1761	-0.310062	-0.58558	-0.224409	-0.456766	-0.0840814	5	5	5	31.5	31.5	31.5	24.57	0	29.447	727440000	48
CHORDC1	Cysteine and histidine-rich domain-containing protein 1	Q9UHD1-2;Q9UHD1	Q9UHD1-2;Q9UHD1		0.0534686	-0.0844178	0.035668	0.0127551	0.0428832	0.0401519	-0.0148338	-0.0681111	0.0347089	-0.00139647	0.0255073	0.013795	-0.0541473	-0.0545478	-0.0240906	0.0137791	0.0106273	-0.0100451	-0.0420332	0.0139095	10	10	10	40.9	40.9	40.9	35.286	0	59.259	895660000	62
CHP1	Calcineurin B homologous protein 1	Q99653	Q99653		-0.188611	0.217116	-0.274228	-0.0527514	-0.041817	0.226896	0.171223	0.350479	-0.478947	0.145064	-0.414876	0.15984	0.0720041	0.218522	0.276538	0.0440214	-0.158438	-0.0345046	0.0381121	-0.332013	3	3	3	18.5	18.5	18.5	22.456	0	5.4525	64308000	9
CHTOP	Chromatin target of PRMT1 protein	Q9Y3Y2-4;Q9Y3Y2;Q9Y3Y2-3	Q9Y3Y2-4;Q9Y3Y2;Q9Y3Y2-3		-0.27261	-0.0691491	-0.0423706	-0.00318022	-0.122801	-0.014274	-0.072008	0.192025	-0.0939033	0.250518	-0.165052	0.0844447	-0.0712674	0.263058	0.0149811	-0.0785313	-0.15081	0.258525	-0.0310205	0.0670574	3	3	3	17.8	17.8	17.8	21.918	0	8.4927	146860000	10
CIAO1	Probable cytosolic iron-sulfur protein assembly protein CIAO1	O76071	O76071		-0.0995516	0.155902	0.0268322	-0.201706	-0.141109	0.238468	-0.11037	0.354122	0.108355	0.219201	0.0364555	0.101661	-0.158003	-0.248671	0.126936	-0.208944	-0.0644301	-0.0328774	-0.0694485	-0.0891923	6	6	6	27.7	27.7	27.7	37.84	0	21.769	128980000	17
CIAPIN1	Anamorsin	Q6FI81;Q6FI81-3;Q6FI81-2	Q6FI81;Q6FI81-3		-0.011994	0.0372428	-0.0479506	0.0307181	0.00283403	0.00396514	-0.0545166	0.0562543	-0.0223138	-0.0187081	-0.0704718	-0.0245555	-0.0521109	0.0238922	0.00963286	0.0700121	-0.00887778	0.0233558	0.0161835	-0.0189612	10	10	10	31.7	31.7	31.7	33.582	0	59.813	910790000	43
CIRBP	Cold-inducible RNA-binding protein	Q14011;Q14011-2	Q14011;Q14011-2		-0.211281	0.341468	-0.226809	-0.0743605	0.12391	-0.116941	0.121147	0.174054	-0.287839	-0.0394899	-0.064456	-0.0238239	0.168754	0.235492	0.124979	-0.089899	-0.187953	-0.0488347	-0.0480016	0.0735148	4	4	4	33.1	33.1	33.1	18.648	0	24.753	272690000	33
CISD2	CDGSH iron-sulfur domain-containing protein 2	Q8N5K1	Q8N5K1		0.0343943	0.015845	0.00401115	0.190275	0.0262722	-0.0438543	-0.170972	-0.163019	0.00135517	-0.0815804	0.0123517	-0.106639	-0.0179982	0.0139232	-0.0291695	0.0753353	0.0412489	-0.0123205	0.0852446	0.0689273	6	6	6	45.9	45.9	45.9	15.278	0	9.6307	346770000	16
CKAP2	Cytoskeleton-associated protein 2	Q8WWK9-6;Q8WWK9-5;Q8WWK9;Q8WWK9-4	Q8WWK9-6;Q8WWK9-5;Q8WWK9		0.0305015	0.256648	-0.204731	0.05832	-0.183803	-0.0548968	-0.102449	-0.00142527	-0.139134	0.103586	-0.263748	0.0818541	-0.0378126	0.197447	0.0861801	0.15032	-0.00262567	-0.192624	0.0203926	0.141631	3	3	3	5.4	5.4	5.4	71.194	0	6.6314	62492000	4
CKAP4	Cytoskeleton-associated protein 4	Q07065;Q96K21-4;Q96K21-3;Q96K21-2;Q96K21	Q07065		0.0374206	0.0089311	0.0218383	0.0177166	0.0267569	2.55108e-05	0.0115939	-0.0585167	0.00356793	-0.0290641	-0.00904769	-0.0229534	-0.0362999	-0.0142958	-0.0174764	0.0195388	-0.0347042	0.0149473	0.00279188	0.000859857	27	27	27	52.2	52.2	52.2	66.022	0	304.87	2511900000	151
CKAP5	Cytoskeleton-associated protein 5	Q14008-2;Q14008;Q14008-3	Q14008-2;Q14008;Q14008-3		0.000848681	-0.0129389	0.00356989	-5.01573e-05	-0.0339696	-0.0431248	-0.0495422	-0.0493937	0.0422581	-0.0231631	0.0215025	0.0160959	-0.0678402	0.0707354	-0.0424491	0.00167665	0.00950578	0.0349741	0.0274255	0.0375098	38	38	37	21.1	21.1	20.8	218.52	0	101.79	1171200000	128
CKB	Creatine kinase B-type	P12277;P06732	P12277		0.0836014	-0.0542745	0.0511166	0.019985	0.0344208	-0.0286628	0.0150411	-0.0826727	0.0437464	-0.040943	0.0256132	-0.0664518	0.0305966	-0.0660143	-0.039931	0.0316625	0.00460437	-0.0297895	0.00144587	0.0105364	21	21	21	74.3	74.3	74.3	42.644	0	323.31	10216000000	305
CKMT1A	Creatine kinase U-type, mitochondrial	P12532;P12532-2;P17540	P12532;P12532-2		-0.714985	0.890819	-0.651755	-0.0100892	-0.10057	-0.433501	0.434406	0.463372	-0.884308	0.261708	-0.742852	0.984083	0.223496	1.02405	0.736115	-0.235026	-0.617474	0.328048	-0.313489	-0.698419	5	5	5	16.1	16.1	16.1	47.036	0	17.096	119430000	13
CKS1B	Cyclin-dependent kinases regulatory subunit 1	P61024	P61024		-0.185733	0.420005	-0.0402122	0.104823	-0.0139906	-0.217208	-0.0446782	0.100513	-0.348298	0.271859	-0.284268	0.562978	-0.0136062	0.306592	0.238631	-0.186247	-0.239506	-0.00282911	-0.390621	-0.094573	2	2	2	32.9	32.9	32.9	9.6601	0	28.16	121310000	13
CKS2	Cyclin-dependent kinases regulatory subunit 2	P33552	P33552		0.0341864	0.528341	0.029928	-6.01709e-05	-0.108078	-0.0389638	-0.0405199	-0.0650115	-0.238935	-0.0311892	-0.0813575	0.224274	0.0584674	0.0544429	0.0617403	0.0197779	-0.174172	-0.106814	-0.103186	-0.0792395	2	2	2	32.9	32.9	32.9	9.8602	0	14.624	90247000	4
CLASP1	CLIP-associating protein 1	Q7Z460-4;Q7Z460-2;Q7Z460-5;Q7Z460-3;Q7Z460	Q7Z460-4;Q7Z460-2;Q7Z460-5;Q7Z460-3;Q7Z460		0.0379553	0.0235516	-0.0234551	-0.00569762	-0.0459152	0.0620408	0.0582404	-0.0243843	0.0258894	-0.0285723	0.041773	-0.0243464	-0.0401425	-0.108077	-0.147257	0.0239604	0.0459706	0.00458436	0.0510511	0.0164604	15	15	14	12.3	12.3	11.7	163.06	0	35.423	277840000	28
CLASP2	CLIP-associating protein 2	O75122;O75122-3;O75122-2	O75122;O75122-3;O75122-2		0.081983	-0.234902	0.0788668	-0.032404	0.118749	0.181586	-0.0763361	-0.0359292	0.244916	0.0532438	-0.036056	-0.0609748	0.0223388	-0.742189	0.145742	-0.135839	0.141084	0.110476	0.508683	-0.389408	6	5	5	5.2	4.6	4.6	141.06	0	12.638	59237000	7
CLCC1	Chloride channel CLIC-like protein 1	Q96S66-4;Q96S66-3;Q96S66-2;Q96S66	Q96S66-4;Q96S66-3;Q96S66-2;Q96S66		-0.0301922	0.0158365	0.0425182	-0.0196002	0.0586209	0.0750061	0.137555	-0.00372094	0.00336468	0.0392159	0.0743125	-0.276079	0.0489813	-0.0901025	-0.101134	0.0784201	-0.0482733	-0.0951718	-0.0271378	0.0612117	3	3	3	9.3	9.3	9.3	39.837	0	16.061	56490000	6
CLIC1	Chloride intracellular channel protein 1	O00299	O00299		0.0483431	-0.076991	0.0404784	0.038966	0.00113659	-0.028206	-0.00160915	-0.111122	0.0502895	-0.0366581	0.00664371	-0.0246628	-0.0043107	-0.0396987	0.00194007	-0.00129557	0.0144282	0.0489525	-0.0104379	0.0274441	15	15	15	68.5	68.5	68.5	26.922	0	102.69	2884900000	124
CLIC4	Chloride intracellular channel protein 4	Q9Y696	Q9Y696		0.0673418	0.00883645	0.07561	-0.0374394	0.00623741	-0.0257497	0.0552309	-0.0628972	-0.0828276	0.0179708	-0.0484862	-0.0339219	-0.0405927	0.0720335	0.0870794	-0.0149731	-0.0296081	-0.0163564	-0.0295856	-0.0242717	5	5	5	28.5	28.5	28.5	28.772	0	74.549	1061400000	28
CLINT1	Clathrin interactor 1	Q14677-2;Q14677;Q14677-3	Q14677-2;Q14677;Q14677-3		0.0225231	-0.00181597	0.059377	0.0638985	0.0286097	0.00473552	-0.0893314	-0.0903921	0.0256807	0.0116157	0.0344477	-0.0642769	-0.00084915	-0.0175765	-0.00688374	0.00836668	-0.0321324	-0.063505	0.0192773	0.0318621	9	9	9	20	20	20	68.166	0	51.55	392860000	31
CLIP1	CAP-Gly domain-containing linker protein 1	P30622-2;P30622-1;P30622;Q9UDT6-2;Q9UDT6	P30622-2;P30622-1;P30622		-0.101477	0.393762	0.0736571	-0.211511	-0.00303326	0.0213704	0.122311	0.246702	-0.211854	0.0204609	-0.293865	0.321793	0.0425458	0.210424	0.173064	0.0441989	-0.326954	-0.0679597	-0.174264	-0.335739	9	9	9	7.3	7.3	7.3	156.78	0	26.899	220930000	18
CLNS1A	Methylosome subunit pICln	P54105	P54105		0.028953	0.0702067	0.0638818	-0.112944	0.0564745	0.13107	0.11445	0.0560004	-0.026075	0.0653021	-0.00425851	0.0567125	0.0354518	-0.215826	-0.0138803	0.0040595	-0.0685911	-0.0996805	-0.105899	-0.0917783	5	5	5	38.4	38.4	38.4	26.215	0	34.783	422490000	46
CLPB	Caseinolytic peptidase B protein homolog	Q9H078-2;Q9H078;Q9H078-3;Q9H078-5;Q9H078-4	Q9H078-2;Q9H078;Q9H078-3;Q9H078-5;Q9H078-4		-0.0367381	0.0460252	0.13109	0.154828	-0.0599988	-0.0386031	-0.236923	-0.108683	-0.0789487	0.032528	0.133285	-0.160963	0.00504284	0.258768	-0.0890808	-0.0411957	-0.0173455	-0.133444	0.134708	0.04928	5	5	5	8.6	8.6	8.6	75.448	0	11.125	83318000	11
CLPTM1	Cleft lip and palate transmembrane protein 1	O96005;O96005-4;O96005-3	O96005;O96005-4;O96005-3		-0.0412982	-0.0150667	-0.0468217	-0.0536442	0.024335	0.201019	0.00794592	-0.0336002	0.0205925	-0.0595727	0.00630343	-0.0423895	-0.0551594	-0.102977	-0.25589	0.0633733	-0.0313937	0.0368068	0.109282	0.211787	10	10	10	17	17	17	76.096	0	47.835	444600000	35
CLPTM1L	Cleft lip and palate transmembrane protein 1-like protein	Q96KA5-2;Q96KA5	Q96KA5-2;Q96KA5		0.108278	-0.130471	0.0790111	0.0201218	0.0353903	0.0816302	-0.0312966	-0.145037	0.115261	-0.00746269	0.0246685	0.0659634	-0.021255	-0.31191	-0.0708535	0.0021781	0.106102	0.00172239	-0.0426602	0.0642496	5	5	5	11	11	11	58.355	0	13.407	98263000	14
CLPX	ATP-dependent Clp protease ATP-binding subunit clpX-like, mitochondrial	O76031	O76031		-0.0387085	-0.073971	0.0706733	0.0108322	-0.0370793	-0.0876555	0.033067	-0.178118	0.0371629	0.0153798	-0.037632	0.132185	-0.014068	0.163528	-0.034278	-0.0114354	-0.0227549	0.035452	-0.00425272	-0.0146963	8	8	8	16	16	16	69.223	0	23.266	203580000	17
CLTA	Clathrin light chain A	P09496-2;P09496-4;P09496-3;P09496;P09496-5	P09496-2;P09496-4;P09496-3;P09496;P09496-5		0.0522045	0.473516	0.087827	-0.0333715	-0.00655479	0.276824	0.0298169	0.52422	-0.333949	0.172163	-0.356467	0.509153	-0.104343	0.0595712	-0.0303756	-0.102898	-0.342915	-0.269232	-0.298432	-0.363129	9	9	9	35.3	35.3	35.3	23.662	0	54.826	4057700000	117
CLTB	Clathrin light chain B	P09497-2;P09497	P09497-2;P09497		0.113255	0.424735	0.16713	-0.0640081	-0.0986871	0.24825	-0.0726275	0.528851	-0.321137	0.138068	-0.336433	0.506661	-0.135747	0.092089	-0.0448131	-0.0458934	-0.298967	-0.184574	-0.292672	-0.379849	9	9	9	34.1	34.1	34.1	23.181	0	23.086	1051500000	56
CLTC	Clathrin heavy chain 1	Q00610-2;Q00610;P53675-2;P53675	Q00610-2;Q00610		0.0607294	-0.0347518	0.045906	0.0217133	0.0199431	-0.0386259	0.0134734	-0.0728344	0.0474037	-0.019944	0.0298935	-0.0617062	-0.0192262	-0.0654259	-0.0361447	0.00741262	0.00484946	0.0223336	0.00532179	0.0133099	68	68	68	46	46	46	187.89	0	323.31	13803000000	544
CLUH	Clustered mitochondria protein homolog	O75153	O75153		0.00544569	0.0840186	0.0157802	0.0765703	0.0187832	0.0256287	0.0081231	-0.081637	-0.0128028	0.00871372	0.0307001	-0.152616	-0.0477517	-0.0859863	-0.175893	0.0246987	-0.0289861	0.0102227	0.146558	0.0740616	17	17	17	14.3	14.3	14.3	146.67	0	34.947	347580000	34
CMAS	N-acylneuraminate cytidylyltransferase	Q8NFW8;Q8NFW8-2	Q8NFW8;Q8NFW8-2		-0.0671173	-0.123876	-0.00236006	0.0378679	-0.013076	0.0269078	-0.0337465	0.0423298	0.149205	-0.177521	0.0371218	-0.124729	0.0640391	-0.0604535	0.00871551	0.17971	0.131039	0.0481381	0.0590312	-0.237595	3	3	3	7.1	7.1	7.1	48.379	0	22.905	85759000	8
CMBL	Carboxymethylenebutenolidase homolog	Q96DG6	Q96DG6		8.31783e-05	-0.0141526	-0.0973916	0.146426	0.0532614	0.0019814	-0.00731134	-0.0927532	0.0783827	-0.0183001	-0.0170429	-0.206368	-0.0138886	-0.165742	0.174828	-0.00380297	0.0352133	0.020447	0.0410976	0.0286636	7	7	6	28.2	28.2	22.4	28.048	0	7.6986	157260000	10
CMPK1	UMP-CMP kinase	P30085;P30085-2	P30085;P30085-2		0.0575469	0.0153808	0.0460687	0.0300776	0.0149018	0.040015	0.0568156	0.0438215	-0.0470569	0.00990973	-0.0359676	-0.00321484	-0.0116322	0.0191525	-0.00165266	0.0162728	-0.098711	-0.0222212	-0.0605842	-0.125292	5	5	5	27.6	27.6	27.6	22.222	0	18.969	581190000	31
CMSS1	Protein CMSS1	Q9BQ75-2;Q9BQ75	Q9BQ75-2;Q9BQ75		-0.00839671	-0.299165	0.382875	-0.283274	-0.112313	0.109088	0.180324	-0.480475	0.181508	-0.142049	-0.0182548	-0.11745	-0.222666	0.0591058	0.29263	0.0393053	0.17601	0.236163	-0.0368088	0.00747329	2	2	2	5.7	5.7	5.7	29.964	0.005172	1.825	11433000	2
CMTR1	Cap-specific mRNA (nucleoside-2-O-)-methyltransferase 1	Q8N1G2	Q8N1G2		0.00116655	0.0328836	0.148513	0.112962	-0.0333055	-0.114163	0.0289762	0.0472131	0.0309126	0.015687	-0.00483179	-0.221912	-0.00154428	0.0571287	-0.073898	-0.00385609	0.0358666	-0.0473468	-0.0856111	0.0187905	5	5	5	5.6	5.6	5.6	95.32	0	6.832	75126000	9
CNBP	Cellular nucleic acid-binding protein	P62633-2;P62633;P62633-7;P62633-3;P62633-8;P62633-5;P62633-4;P62633-6	P62633-2;P62633;P62633-7;P62633-3;P62633-8;P62633-5;P62633-4;P62633-6		-0.445175	0.436001	-0.326017	-0.220252	-0.0795799	-0.0289474	0.125936	0.969976	-0.465621	0.22549	-0.361397	0.374001	0.0794339	0.773426	0.253785	-0.0264704	-0.661002	0.14326	-0.499667	-0.323549	11	11	11	64.7	64.7	64.7	18.742	0	49.626	3502800000	62
CNDP2	Cytosolic non-specific dipeptidase	Q96KP4;Q96KP4-2	Q96KP4;Q96KP4-2		0.115386	-0.162697	0.107753	0.010227	0.0277706	-0.0781396	-0.0664552	-0.124261	0.118294	0.0125933	0.0894064	-0.156787	0.0133588	-0.171574	0.0122989	-0.0168319	0.0444096	0.0578835	0.0531951	0.0578005	12	12	12	30.5	30.5	30.5	52.878	0	81.394	1202500000	71
CNN2	Calponin-2	Q99439;Q99439-2	Q99439;Q99439-2		0.0642888	-0.00890988	-0.00494081	-0.00477	0.140333	-0.0861949	-0.0144957	0.0451516	0.129783	0.00625839	-0.09789	-0.0369924	0.101725	-0.349152	-0.305432	-0.120316	0.0197137	-0.0405601	0.347093	0.158936	3	2	2	9.4	5.8	5.8	33.697	0.0011504	2.7397	47122000	4
CNN3	Calponin-3	Q15417;Q15417-3;Q15417-2;P51911-2;P51911	Q15417;Q15417-3;Q15417-2		0.0277314	-0.0251787	-0.11335	-0.0163184	0.024392	0.0482969	-0.091428	0.0647922	0.0655398	0.0164817	-0.00695753	0.0517123	-0.0561066	-0.0967187	-0.0429913	0.00832329	0.0392877	-0.0664401	0.0390427	0.0735201	10	10	9	38.9	38.9	35.6	36.413	0	64.731	924180000	66
CNOT1	CCR4-NOT transcription complex subunit 1	A5YKK6-2;A5YKK6;A5YKK6-3;A5YKK6-4	A5YKK6-2;A5YKK6;A5YKK6-3		-0.0387202	0.0566497	0.0118803	-0.0188079	0.00752001	-0.0493914	-0.00421581	0.0118743	0.0139416	-0.0690883	0.0139304	-0.0485879	0.0425829	0.0108141	-0.0900402	0.00849743	0.0157571	-0.0127802	0.0478123	0.0340022	12	12	12	5.9	5.9	5.9	266.38	0	23.812	203650000	23
CNOT10	CCR4-NOT transcription complex subunit 10	Q9H9A5-2;Q9H9A5;Q9H9A5-6;Q9H9A5-5;Q9H9A5-4;Q9H9A5-3	Q9H9A5-2;Q9H9A5;Q9H9A5-6;Q9H9A5-5;Q9H9A5-4;Q9H9A5-3		-0.0137649	-0.0135316	0.146486	-0.129466	0.015168	-0.0643331	-0.353216	-0.0653945	0.215855	0.0472128	-0.0875378	0.208291	-0.0404655	-0.550386	-0.485565	0.335016	0.259855	0.121676	0.21311	0.184622	3	3	3	6.1	6.1	6.1	82.18	0	11.061	45876000	7
CNOT3	CCR4-NOT transcription complex subunit 3	O75175	O75175		-0.172575	0.337056	-0.0977569	0.0232893	0.00466175	0.000611544	0.16705	0.342507	-0.337428	0.0329243	-0.398669	0.166825	0.034262	0.120961	0.268983	-0.159666	-0.147652	0.104465	-0.0636035	-0.282614	7	7	7	10.6	10.6	10.6	81.871	0	18.565	346900000	19
CNP	2,3-cyclic-nucleotide 3-phosphodiesterase	P09543-2;P09543;Q5TBK1-2;Q5TBK1;Q92802;Q92802-2;Q86UW6-2;Q86UW6	P09543-2;P09543		-0.0218832	0.0106482	0.0497101	0.0145539	-0.00571995	-0.0347517	0.00929049	-0.0602956	-0.0678246	-0.0489983	-0.0141864	-0.0373733	0.0115703	0.120569	0.00648057	0.031797	-0.0217481	0.0354241	-0.0126484	-0.0209834	22	22	21	48.9	48.9	47.1	45.098	0	54.687	1037300000	61
CNPY2	Protein canopy homolog 2	Q9Y2B0;Q9Y2B0-2	Q9Y2B0		-0.134857	0.413858	-0.0641499	-0.0432567	-0.000615127	0.0987292	0.0590191	0.347826	-0.274966	0.0466503	-0.208188	0.268403	-0.0329713	0.223537	0.0253254	-0.0817205	-0.238151	-0.123928	-0.127108	-0.209804	7	7	7	43.4	43.4	43.4	20.652	0	66.994	2423100000	57
CNPY3	Protein canopy homolog 3	Q9BT09	Q9BT09		-0.0748136	0.12936	0.0276935	-0.0860731	0.00670681	0.0183541	0.0809876	0.173112	-0.0691249	0.138144	-0.0536237	0.172311	0.023956	0.0322788	-0.129462	-0.0696101	-0.18387	-0.0437057	-0.0679645	-0.0810258	7	7	7	28.4	28.4	28.4	30.748	0	22.538	271700000	15
COA3	Cytochrome c oxidase assembly factor 3 homolog, mitochondrial	Q9Y2R0	Q9Y2R0		-0.195193	-0.11935	-0.294758	-0.236968	-0.154116	-0.055681	-0.30725	-0.0895875	-0.103715	0.0972	-0.115075	0.779068	-0.0418307	0.739781	0.0648981	0.421476	-0.148112	-0.0416967	-0.0125958	-0.242862	4	4	4	37.7	37.7	37.7	11.731	0	11.538	245510000	19
COA6	Cytochrome c oxidase assembly factor 6 homolog	Q5JTJ3-3;Q5JTJ3;Q5JTJ3-2	Q5JTJ3-3;Q5JTJ3;Q5JTJ3-2		0.238105	0.00503772	0.174857	-0.291397	-0.121158	0.24028	0.0663744	0.417079	-0.071584	0.129496	-0.206106	0.731858	-0.168767	0.190896	0.0582649	-0.0912996	-0.281305	-0.183716	-0.691286	-0.202	4	4	4	51.9	51.9	51.9	9.4275	0	15.242	92577000	16
COA7	Cytochrome c oxidase assembly factor 7	Q96BR5	Q96BR5		-0.0588614	0.110637	0.00308952	-0.0364964	-0.0226062	0.0878274	0.000866503	0.33914	-0.18823	0.0669232	-0.085014	0.0802909	0.00230674	-0.0500652	-0.21889	-0.0167233	0.0842991	-0.0549447	-0.0808363	-0.019082	6	6	6	26	26	26	25.709	0	11.513	344400000	14
COASY	Bifunctional coenzyme A synthase;Phosphopantetheine adenylyltransferase;Dephospho-CoA kinase	Q13057;Q13057-2	Q13057;Q13057-2		-0.191808	0.0856239	-0.274572	-0.0979436	-0.232452	-0.352663	-0.283994	0.337129	-0.218766	0.187765	-0.233742	0.224593	0.0271664	0.545157	0.0754167	0.0787939	0.0151302	0.112132	0.0938892	0.046775	11	11	11	25	25	25	62.328	0	41.725	382900000	30
COG5	Conserved oligomeric Golgi complex subunit 5	Q9UP83-3;Q9UP83;Q9UP83-2	Q9UP83-3;Q9UP83;Q9UP83-2		-0.419565	-0.0389214	-0.360922	-0.0427076	-0.0818504	-0.172941	0.0543858	0.184545	-0.465483	0.175964	-0.180789	0.02061	0.113187	0.359276	0.303417	0.0860286	0.114508	0.393112	0.0511466	-0.14937	4	4	4	7	7	7	90.808	0	4.7636	66385000	8
COG8	Conserved oligomeric Golgi complex subunit 8	Q96MW5	Q96MW5		-0.217606	0.130064	0.13498	-0.169085	-0.154418	-0.0854988	0.112996	-0.0119224	0.00108778	-0.0378796	-0.0765405	-0.16053	-0.0123843	0.159832	-0.0806796	-0.147588	0.0858929	0.108195	0.293231	0.0714839	3	3	3	5.7	5.7	5.7	68.423	0	5.0474	66739000	7
COL4A3BP	Collagen type IV alpha-3-binding protein	Q9Y5P4-2;Q9Y5P4;Q9Y5P4-3	Q9Y5P4-2;Q9Y5P4;Q9Y5P4-3		0.0669931	0.0163317	-0.0681567	-0.080829	-0.00179405	-0.010522	-0.0606322	0.106859	0.0783466	0.00804443	0.107114	-0.123471	0.0971679	-0.0943099	-0.163392	-0.0163056	-0.140624	-0.0423484	0.00425711	0.260901	4	4	4	7.5	7.5	7.5	68.006	0	13.445	102560000	9
COLGALT1	Procollagen galactosyltransferase 1	Q8NBJ5	Q8NBJ5		-0.0548299	0.0318225	0.0176911	0.0442654	-0.033946	0.0350495	0.0287538	-0.0151032	0.0411516	-0.0743252	-0.0201977	-0.157865	-0.00589647	0.105979	-0.116657	0.158698	0.0658553	-0.133575	-0.0173303	0.0440893	7	7	7	12.4	12.4	12.4	71.635	0	12.403	185390000	15
COMMD1	COMM domain-containing protein 1	Q8N668-2;Q8N668	Q8N668-2;Q8N668		0.30518	0.127536	0.149053	0.226095	0.102763	0.251589	0.179156	-0.111278	-0.267559	-0.410006	-0.143471	-0.203286	-0.00499558	-0.0502488	-0.156036	-0.046976	-0.0471364	-0.0298364	0.14957	-0.076481	2	2	2	15.1	15.1	15.1	17.665	0.00030321	3.327	24771000	2
COMT	Catechol O-methyltransferase	P21964-2;P21964	P21964-2;P21964		0.0368611	-0.00731057	-0.0428719	0.079108	-0.0063324	-0.0235881	-0.0242447	-0.0496537	-0.00103986	-0.0127092	0.0373653	-0.0724954	0.0465117	-0.0256127	-0.0343826	0.00733032	0.0165141	-0.0460084	0.0087719	0.057418	5	5	5	28.1	28.1	28.1	24.449	0	20.068	238960000	22
COPA	Coatomer subunit alpha;Xenin;Proxenin	P53621;P53621-2	P53621;P53621-2		0.0565148	-0.0363401	0.0485227	0.00702839	0.00606384	-0.0500198	0.021486	-0.0787912	0.0416002	-0.0230104	0.0172152	-0.0351637	-0.0214763	0.0136495	0.00794151	0.00103807	-0.0040668	-0.00562949	-0.0337085	0.0107768	37	37	37	34.2	34.2	34.2	138.34	0	141.07	1971800000	161
COPB1	Coatomer subunit beta	P53618	P53618		-0.0322395	0.0562907	0.00818691	0.0477159	-0.0453884	-0.0525753	0.00642833	-0.0700356	-0.0379263	-0.025419	-0.0137116	-0.0101041	-0.0624248	0.199817	-0.0069626	-0.0044323	-0.0262394	0.00339075	0.0305872	-0.0213269	18	18	18	23	23	23	107.14	0	72.076	1420800000	79
COPB2	Coatomer subunit beta	P35606;P35606-2	P35606;P35606-2		0.0745008	-0.0548187	0.0383015	0.040455	-0.00224485	6.88061e-05	-0.00756645	-0.0780728	0.0443943	-0.0140862	0.0324246	-0.0548883	-0.0322855	-0.0502517	-0.0670981	0.0520866	0.0135339	-0.00152516	-0.00905762	0.0197606	23	23	22	32.5	32.5	31.6	102.49	0	120.91	1483100000	115
COPE	Coatomer subunit epsilon	O14579;O14579-3;O14579-2	O14579;O14579-3;O14579-2		0.0252143	-0.0991756	-0.0637172	0.145569	-0.0231271	-0.0257983	-0.161898	-0.0499111	0.0861417	0.0161866	0.0830054	-0.148635	-0.00939789	-0.0194104	-0.0912139	0.00642633	0.0990541	-0.0724019	0.0651046	0.181615	6	6	6	25.6	25.6	25.6	34.482	0	19.727	280560000	44
COPG1	Coatomer subunit gamma-1	Q9Y678	Q9Y678		0.0512979	-0.0540205	0.0500395	-0.00684901	0.0374452	-0.00155053	-0.0681713	-0.0619078	0.0224426	-0.0472999	0.0514354	-0.00453216	-0.0194395	-0.0280339	-0.0473396	-0.00470638	-0.0132853	0.0297296	0.0456291	0.0127475	20	20	16	28.3	28.3	22.5	97.717	0	66.548	715960000	70
COPG2	Coatomer subunit gamma-2	Q9UBF2-2;Q9UBF2;Q92521	Q9UBF2-2;Q9UBF2		0.0936635	-0.00381476	0.0203061	0.0626369	0.00405569	-0.0306008	0.0172629	-0.0702808	0.00421357	-0.0947904	-0.0468577	-0.00441647	-0.06654	0.0134953	-0.025465	0.0211108	0.00530717	0.052296	0.0177802	-0.025732	15	11	11	23	16.1	16.1	81.482	0	30.202	376180000	34
COPS2	COP9 signalosome complex subunit 2	P61201;P61201-2	P61201;P61201-2		0.0329823	-0.144976	-0.0227348	-0.0702029	-0.0916159	-0.0481235	-0.044266	0.0378346	0.137526	-0.0815227	-0.0196729	-0.0240714	0.00390425	0.111088	-0.0411469	0.093104	0.0738516	-0.0158286	0.0410473	0.016454	7	7	7	15.6	15.6	15.6	51.596	0	20.726	289880000	22
COPS3	COP9 signalosome complex subunit 3	Q9UNS2;Q9UNS2-2	Q9UNS2;Q9UNS2-2		-0.0127966	-0.0241752	0.00905246	0.020427	-0.00399762	0.00777268	-0.00910836	0.0454921	-0.0431006	0.00753269	0.115342	-0.171025	-0.0571429	0.148358	-0.0256836	0.0295286	0.00872943	-0.0538942	-0.0084032	-0.0392773	10	10	10	26.7	26.7	26.7	47.873	0	22.73	767130000	35
COPS4	COP9 signalosome complex subunit 4	Q9BT78;Q9BT78-2	Q9BT78;Q9BT78-2		0.0491939	-0.0506971	0.0470136	0.028026	0.0532664	-0.0334015	-0.0794999	-0.0118151	0.0421386	-0.0163009	0.0548677	-0.165051	-0.0222549	-0.120008	0.0402039	0.0100022	0.0509283	0.0244213	-0.0116313	0.0542287	12	12	12	34.5	34.5	34.5	46.268	0	67.22	563190000	40
COPS5	COP9 signalosome complex subunit 5	Q92905	Q92905	+	0.00552383	-0.299404	-0.364512	0.0859187	-0.0108666	0.0612579	0.289998	0.123859	0.17661	0.148629	-0.690801	0.335463	0.0421368	-0.17162	0.158332	0.0108509	0.150047	-0.125028	0.225823	-0.208587	7	7	7	25.4	25.4	25.4	37.578	0	18.837	289440000	13
COPS6	COP9 signalosome complex subunit 6	Q7L5N1	Q7L5N1	+	-0.0285269	0.201234	-0.0798531	0.0861121	-0.0506718	-0.222919	-0.205218	0.109282	-0.149311	0.10797	0.0243508	-0.034205	-0.192217	0.347965	-0.0795044	-0.0392601	0.0651884	-0.101428	0.148749	0.035892	3	3	3	8.6	8.6	8.6	36.163	0	6.1267	111870000	13
COPS7A	COP9 signalosome complex subunit 7a	Q9UBW8	Q9UBW8		-0.0214975	-0.0276995	0.0513201	0.013198	0.0777164	-0.0666383	-0.24433	-0.0970414	0.00214696	0.0330181	0.0272452	0.0656276	-0.00177126	-0.108291	-0.0149588	-0.0467245	0.106146	-0.0158441	0.212462	-0.000452518	4	4	4	13.8	13.8	13.8	30.276	0	7.2345	311400000	8
COPS7B	COP9 signalosome complex subunit 7b	Q9H9Q2;Q9H9Q2-2;Q9H9Q2-3	Q9H9Q2;Q9H9Q2-2		-0.307455	0.117597	-0.0718762	-0.10938	0.100936	-0.0880886	0.0594819	-0.117658	-0.232064	0.139269	-0.101764	0.392529	0.0659451	0.50334	0.195597	-0.167334	-0.138677	-0.183517	-0.0118096	-0.101442	3	3	3	14.8	14.8	14.8	29.622	0	8.5074	256150000	5
COPS8	COP9 signalosome complex subunit 8	Q99627-2;Q99627	Q99627-2;Q99627		-0.056282	-0.265234	-0.0582183	0.181729	0.045915	0.122662	-0.18926	-0.136568	0.055295	-0.00648613	0.105854	-0.0176638	-0.00472403	-0.0872235	-0.0981948	0.0612369	0.0444933	0.12887	-0.0391807	0.15661	3	3	3	31.2	31.2	31.2	17.909	0	24.494	176000000	29
COPZ1	Coatomer subunit zeta-1	P61923;P61923-5;P61923-4;P61923-2;P61923-3	P61923;P61923-5;P61923-4		0.0678494	-0.061411	0.0981402	0.000693798	-0.0324177	-0.0620883	0.0491146	-0.0554112	0.115508	-0.129321	0.115318	-0.152101	-0.033542	0.0438822	0.0360022	-0.0958851	0.0159253	0.0529006	-0.049596	0.0200691	5	5	4	32.8	32.8	24.9	20.198	0	14.519	254370000	18
COQ9	Ubiquinone biosynthesis protein COQ9, mitochondrial	O75208;O75208-2	O75208;O75208-2		-0.232119	0.0880937	-0.320107	0.0400985	-0.138257	-0.129406	-0.391252	0.154688	-0.205085	0.0463906	-0.0550042	0.0940263	0.0606602	0.498805	0.0383137	0.0535278	-0.0320273	0.0202306	0.260342	0.0917127	2	2	2	9.1	9.1	9.1	35.509	0	15.759	43995000	5
CORO1B	Coronin-1B	Q9BR76	Q9BR76		0.0223275	-0.00755817	0.0427381	0.0880769	0.0117735	-0.0432544	0.0439178	0.0059728	0.0123072	-0.0238783	-0.00671393	-0.0730384	-0.00828695	-0.0123581	0.0268009	-0.0891829	-0.00390562	0.030119	0.00240574	-0.0746319	6	6	6	11.2	11.2	11.2	54.234	0	13.971	339930000	21
CORO1C	Coronin-1C	Q9ULV4;Q9ULV4-2;Q9ULV4-3	Q9ULV4;Q9ULV4-2;Q9ULV4-3		0.109693	-0.103252	0.0721405	0.0430917	0.0885907	0.0769149	-0.00993845	-0.063972	0.148101	-0.0316644	0.131706	-0.0433452	0.0734827	-0.251735	-0.133434	0.00577316	-0.000427872	-0.132417	-0.0384119	0.00273544	12	12	12	32.1	32.1	32.1	53.248	0	27.381	307490000	45
CORO7;PAM16	Coronin-7;Mitochondrial import inner membrane translocase subunit TIM16	P57737-3;Q9Y3D7;P57737-2;P57737-4;P57737	P57737-3;Q9Y3D7;P57737-2;P57737-4;P57737		0.0351981	0.0589204	0.00258875	0.0552584	-0.000387855	-0.130849	0.0701156	0.133051	0.0771197	-0.0162461	0.0429298	-0.148039	-0.0393692	-0.111362	-0.207963	0.106843	0.0754466	0.0288143	-0.0276261	-0.0608139	4	4	4	3.6	3.6	3.6	114.16	0	6.4096	115880000	8
COTL1	Coactosin-like protein	Q14019	Q14019		-0.00203463	0.0436804	0.0214383	-0.126512	-0.0124017	0.294033	-0.00319606	0.107148	-0.0859408	0.0296138	-0.0550256	0.186236	-0.0178947	-0.0374917	0.0592664	0.0185571	-0.147761	-0.0865168	-0.0648784	-0.176688	5	5	5	35.9	35.9	35.9	15.945	0	11.945	218880000	20
COX15	Cytochrome c oxidase assembly protein COX15 homolog	Q7KZN9-2;Q7KZN9	Q7KZN9-2;Q7KZN9		-0.00471339	0.148292	-0.0886855	0.0572144	-0.0258932	0.0320139	-0.0182385	-0.0689228	-0.0742639	-0.0857721	0.0525247	0.0518169	-0.0179891	0.0333464	-0.0646848	0.00720529	-0.0286233	0.000888489	0.0997018	-0.0615864	2	2	2	4.1	4.1	4.1	43.835	0.00030647	3.4157	86726000	4
COX4I1	Cytochrome c oxidase subunit 4 isoform 1, mitochondrial	P13073	P13073		0.0447766	-0.023788	0.020571	0.0111164	-0.0076808	0.060547	-0.00857517	-0.016201	-0.00815892	-0.0349298	-0.0568943	0.0560215	-0.0331438	-0.0373465	0.0237159	-0.0197171	0.0253862	-0.00837635	0.00502081	-0.0487129	10	10	10	46.2	46.2	46.2	19.576	0	70.393	1795100000	99
COX5A	Cytochrome c oxidase subunit 5A, mitochondrial	P20674	P20674		0.0352413	0.674762	0.0952249	0.0613591	-0.0879827	0.291524	-0.0248484	0.495776	-0.290716	0.118544	-0.276481	0.325754	-0.181746	-0.12498	-0.0940121	-0.143292	-0.349153	-0.108209	-0.295052	-0.178084	5	5	5	32	32	32	16.762	0	26.826	1513300000	47
COX5B	Cytochrome c oxidase subunit 5B, mitochondrial	P10606	P10606		0.165349	-0.0271663	0.207537	0.0141619	0.0722693	0.168053	-0.128466	0.272825	-0.111343	0.0124609	-0.121038	0.219042	-0.0349742	0.0169324	-0.112036	0.0133834	-0.168418	-0.115879	-0.150457	-0.248606	5	5	5	25.6	25.6	25.6	13.696	0	16.568	511540000	40
COX6B1	Cytochrome c oxidase subunit 6B1	P14854	P14854		0.410616	0.262457	0.44229	-0.264652	-0.0748341	0.290492	-0.148251	0.466329	-0.302913	0.210239	-0.353398	0.740032	-0.158519	0.0896778	-0.145612	-0.106596	-0.289653	-0.460277	-0.362469	-0.301326	3	3	3	31.4	31.4	31.4	10.192	0	6.2537	109290000	12
COX6C	Cytochrome c oxidase subunit 6C	P09669	P09669		0.0970244	-0.144442	0.0967357	0.0978764	0.0366486	0.0335034	-0.0162385	-0.0758758	0.0823826	0.0158236	-0.0107895	-0.0725992	-0.0654517	-0.15719	-0.117098	0.0181966	0.0320025	0.0469851	-0.0347909	0.0809281	4	4	4	33.3	33.3	33.3	8.7813	0	9.1206	773230000	31
COX7A2	Cytochrome c oxidase subunit 7A2, mitochondrial	P14406	P14406		0.0284456	-0.000115335	0.116223	0.0737576	-0.0858109	0.0371769	-0.0258987	-0.16391	0.0660747	-0.0374258	0.0777035	-0.042804	0.0549039	-0.129578	-0.00252259	0.0140325	0.00631812	0.0372958	-0.0764516	-0.00378436	2	2	2	27.7	27.7	27.7	9.3959	0	7.6916	261100000	24
COX7A2L	Cytochrome c oxidase subunit 7A-related protein, mitochondrial	O14548	O14548		0.105491	-0.122668	-0.0497626	-0.241317	0.0496226	0.0180446	0.0574819	-0.103283	-0.00886178	-0.00849485	0.550067	-0.111745	-0.027706	-0.0503289	-0.371052	0.0270452	0.0154661	0.00672031	0.271625	-0.062714	3	3	3	26.3	26.3	26.3	12.615	0	5.0707	91309000	9
COX7C	Cytochrome c oxidase subunit 7C, mitochondrial	P15954	P15954		0.023421	-0.065458	-0.0371505	-0.156178	-0.0484514	-0.0804987	-0.00145254	0.0014931	-0.00997388	-0.120778	-0.0854248	-0.0430942	0.0318356	0.124428	0.02741	0.060167	0.0100577	0.112703	0.0472081	0.153366	2	2	2	28.6	28.6	28.6	7.2454	0	20.139	476850000	29
CPD	Carboxypeptidase D	O75976;O75976-2	O75976;O75976-2		0.0621276	-0.0463064	0.0160083	0.0231209	0.0100268	0.0225334	-0.0141192	0.0237528	0.0279164	0.041076	0.00707114	-0.0466333	0.00207329	-0.159021	-0.0402675	0.0202786	0.0206577	-0.00379796	-0.0218236	-0.0010429	23	23	23	17.2	17.2	17.2	152.93	0	61.602	593950000	66
CPNE1	Copine-1	Q99829	Q99829		0.0406755	-0.0369683	0.13342	-0.0469936	0.0172126	-0.00965619	-0.090631	-0.0995949	0.0683615	-0.0451707	0.0346233	-0.143596	0.018873	-0.074032	0.0014258	0.00862817	0.0127821	-0.0147921	0.0884561	0.0806074	11	11	11	17.9	17.9	17.9	59.058	0	26.926	526570000	48
CPNE3	Copine-3	O75131;Q86YQ8-2;Q9HCH3-2;Q96FN4-2;Q96FN4;Q8IYJ1;O95741;Q9UBL6-2;Q86YQ8;Q9HCH3;O95741-2;Q9UBL6	O75131		0.0470308	-0.0503196	0.0194862	-0.0164252	0.0295046	-0.00732436	0.0380619	-0.0486102	0.0138687	-0.040469	0.0317521	-0.0537317	0.0220565	-0.0148926	0.00540769	0.0108505	-0.00968072	-0.0124889	-0.0243423	0.00389606	18	18	17	30.7	30.7	29.1	60.13	0	52.718	2003900000	96
CPOX	Oxygen-dependent coproporphyrinogen-III oxidase, mitochondrial	P36551;P36551-2	P36551		-0.0113166	-0.0644546	-0.0328476	-0.0561515	-0.00435629	0.0671636	0.0109413	0.156244	-0.02827	0.046514	0.0425916	0.118875	-0.0319708	-0.0409791	-0.374372	0.0972086	0.0509399	-0.00598454	-0.0288885	0.0327447	8	8	8	22.9	22.9	22.9	50.151	0	39.843	180850000	19
CPPED1	Serine/threonine-protein phosphatase CPPED1	Q9BRF8;Q9BRF8-3;Q9BRF8-2	Q9BRF8;Q9BRF8-3;Q9BRF8-2		-0.0259614	0.0822546	-0.0267292	0.0873876	-0.124884	-0.0235882	0.0281118	0.18112	-0.0234008	0.0066741	-0.194396	-0.364272	0.0291691	0.21844	0.0238028	0.0587885	0.0276558	-0.189074	-0.0276854	0.200217	2	2	2	8.3	8.3	8.3	35.548	0	7.4584	32889000	5
CPSF1	Cleavage and polyadenylation specificity factor subunit 1	Q10570	Q10570		-0.124473	0.377619	-0.121247	0.0829803	-0.113394	0.089804	0.237309	-0.0202716	-0.185028	-0.0504687	-0.261791	0.0434308	0.296392	-0.242192	-0.352302	0.15734	-0.136034	0.0650596	0.360294	-0.159396	2	2	2	2.1	2.1	2.1	160.88	0	4.1136	27670000	2
CPSF3	Cleavage and polyadenylation specificity factor subunit 3	Q9UKF6	Q9UKF6		-0.0322925	-0.310985	0.163379	0.0279734	0.162656	-0.0245569	-0.24292	-0.0519821	-0.0120165	0.0943857	0.0025776	-0.10685	0.186886	0.0370372	-0.0805972	0.0778588	0.0116791	-0.135508	0.146044	0.0308615	4	4	4	8	8	8	77.485	0	7.238	71867000	13
CPSF6	Cleavage and polyadenylation specificity factor subunit 6	Q16630-3;Q16630;Q16630-2	Q16630-3;Q16630;Q16630-2		-0.0897582	0.123131	-0.0994157	0.0256102	-0.0163039	0.133465	-0.0333137	0.190025	-0.0507195	0.101276	-0.0922453	0.216814	-0.0277727	0.000342667	-0.0453189	-0.0195504	-0.074206	-0.122169	-0.0434451	-0.132815	8	8	8	21.5	21.5	21.5	52.325	0	31.845	841850000	59
CPSF7	Cleavage and polyadenylation specificity factor subunit 7	Q8N684-2;Q8N684;Q8N684-3	Q8N684-2;Q8N684;Q8N684-3		-0.0584264	0.181016	0.00515908	0.0979755	-0.0115376	0.0376634	0.129902	0.0513052	-0.132223	0.0137179	-0.0160947	0.0607454	-0.0754786	0.255433	0.0261224	-0.018641	-0.146563	-0.0863165	-0.150916	-0.219212	8	8	8	18.6	18.6	18.6	51.095	0	20.692	398690000	33
CPT2	Carnitine O-palmitoyltransferase 2, mitochondrial	P23786	P23786		0.0372447	0.207843	0.173877	0.124444	-0.188163	0.0451702	0.0340948	0.215305	-0.0993253	-0.123373	-0.291858	0.0162225	-0.138982	0.208704	0.0320249	-0.277261	0.134841	-0.106673	0.0871538	-0.147658	3	3	3	7	7	7	73.776	0	8.2788	100050000	6
CPVL	Probable serine carboxypeptidase CPVL	Q9H3G5	Q9H3G5		0.051014	0.00930756	0.0419413	0.0535018	0.0547585	-0.0714794	-0.140677	0.0179103	0.046299	-0.0275051	-0.0487821	-0.0042285	-0.0400767	-0.117999	0.0395128	0.0369009	0.0395438	0.0334225	-0.00373077	-0.0260037	7	7	7	16.2	16.2	16.2	54.163	0	21.398	291210000	22
CRELD1	Cysteine-rich with EGF-like domain protein 1	Q96HD1;Q96HD1-2	Q96HD1;Q96HD1-2		0.0323106	0.0315254	-0.18248	-0.235602	-0.0139108	0.106975	-0.133331	0.431864	-0.00481498	-0.0333272	0.103558	-0.00812855	-0.225843	0.25021	-0.26587	-0.082389	-0.0334933	-0.132346	0.157496	0.181228	2	2	2	5.7	5.7	5.7	45.439	0.00030506	3.3786	25897000	4
CRELD2	Cysteine-rich with EGF-like domain protein 2	Q6UXH1-4;Q6UXH1;Q6UXH1-6;Q6UXH1-5;Q6UXH1-3;Q6UXH1-2	Q6UXH1-4;Q6UXH1;Q6UXH1-6;Q6UXH1-5;Q6UXH1-3;Q6UXH1-2		-0.00835922	0.472424	0.150651	0.0231535	-0.316572	0.276825	-0.144281	0.435459	-0.486973	0.0862765	-0.446976	0.353348	-0.110566	0.397801	-0.156179	0.0144462	-0.161583	-0.171988	-0.0560565	-0.20722	6	6	6	19.7	19.7	19.7	35.288	0	9.5245	181470000	11
CRIPT	Cysteine-rich PDZ-binding protein	Q9P021	Q9P021		-0.131859	-0.0175648	-0.0523858	-0.141545	-0.353909	-0.0449383	0.250424	-0.11249	0.131769	-0.0449113	0.00905913	-0.235718	0.103124	0.39297	0.0138551	0.204844	-0.0655451	0.00814948	-0.194846	0.225148	2	2	2	27.7	27.7	27.7	11.216	0	6.1899	28532000	6
CRK	Adapter molecule crk	P46108;P46108-2	P46108;P46108-2		-0.137262	0.247006	-0.110825	0.0306106	-0.0155479	0.0725659	-0.0126892	0.256713	-0.230929	0.0663893	-0.137385	0.196683	0.0129537	0.221827	0.120879	-0.0797909	-0.167557	-0.0921617	-0.0769646	-0.220885	13	13	13	46.4	46.4	46.4	33.83	0	66.021	959790000	52
CRKL	Crk-like protein	P46109	P46109		-0.0390914	0.0857796	-0.0843082	-0.0551094	0.0808764	0.105982	-0.0626254	0.048464	-0.00787473	0.0631566	0.0542738	0.340329	-0.0549324	-0.0204989	0.140204	-0.11086	-0.133065	-0.103047	-0.154636	-0.149387	9	9	9	38.6	38.6	38.6	33.777	0	71.529	445230000	52
CRLF3	Cytokine receptor-like factor 3	Q8IUI8-2;Q8IUI8	Q8IUI8-2;Q8IUI8		-0.00804147	0.000173151	-0.0289904	0.172494	-0.0704705	-0.0388762	-0.0100761	-0.104308	-0.0810405	0.0436313	-0.130672	-0.163526	-0.00327835	0.0671543	0.179871	0.0506746	0.0154558	0.0525779	0.029743	-0.0288649	5	5	5	11.9	11.9	11.9	49.35	0	9.6706	115470000	13
CRNKL1	Crooked neck-like protein 1	Q9BZJ0-2;Q9BZJ0-3;Q9BZJ0	Q9BZJ0-2;Q9BZJ0-3;Q9BZJ0		-0.127664	-0.108604	0.0402477	-0.107633	0.106601	-0.0510481	-0.0410654	-0.0897536	-0.000566721	-0.0246892	-0.00197554	-0.304012	0.0594484	-0.105906	-0.244488	0.276011	0.0649742	0.16474	0.215178	0.223836	5	5	5	8.9	8.9	8.9	83.147	0	11.205	59190000	8
CRTAP	Cartilage-associated protein	O75718	O75718		-0.0634361	0.00383192	0.0163739	0.0210404	-0.143274	-0.0409729	0.00386837	-0.186857	-0.0235096	0.0579655	0.100884	-0.0284931	-0.0536757	0.186879	0.000323176	-0.0547446	0.0652676	-0.0117908	-0.00366621	0.0976161	4	4	4	8.2	8.2	8.2	46.561	0	6.1469	172080000	6
CRYZ	Quinone oxidoreductase	Q08257-3;Q08257;Q08257-2	Q08257-3;Q08257;Q08257-2		-0.0536758	0.106264	0.0351701	-0.0100912	0.0100138	-0.00944304	-0.0365119	-0.0772102	-0.102937	0.0371786	-0.00374299	0.0274124	-0.00633593	0.103159	0.0550795	0.021868	-0.0769258	-0.0300123	-0.0135222	-0.0321064	7	7	7	25.8	25.8	25.8	31.528	0	26.524	369750000	21
CS	Citrate synthase, mitochondrial	O75390	O75390		0.0600092	-0.0416213	0.0531314	0.016993	0.0477339	-0.0184434	0.00775364	-0.0952339	0.0361493	-0.0289001	0.0148525	-0.00286791	0.00705023	-0.0559952	0.0140837	0.0365725	-0.0174715	-0.0112255	-0.0605443	-0.0183956	14	14	14	29	29	29	51.712	0	86.346	4139400000	153
CSDE1	Cold shock domain-containing protein E1	O75534;O75534-4;O75534-2;O75534-3	O75534;O75534-4;O75534-2;O75534-3		0.0328908	-0.00698358	0.0274806	0.0208851	0.0137376	0.0034513	0.00830793	-0.0120209	0.0255713	-0.00859041	0.0175735	-0.0340118	-0.0144968	-0.0509014	-0.0312871	-0.00555582	-0.0115145	-0.00587887	-0.000196554	-0.0248299	34	34	34	42	42	42	88.884	0	187.88	2558700000	154
CSE1L	Exportin-2	P55060-3;P55060;P55060-4;P55060-2	P55060-3;P55060;P55060-4		0.0917479	-0.0588309	0.0259011	0.0085825	-0.00169659	-0.0105714	-0.0252502	-0.0476542	0.0519177	-0.0165974	0.0337629	-0.0733988	-0.0118722	-0.0824383	-0.0284568	0.012333	0.0189193	-0.00329242	0.0240476	0.0364779	32	32	32	35.2	35.2	35.2	107.78	0	223.77	4723700000	214
CSK	Tyrosine-protein kinase CSK	P41240	P41240		0.0645784	-0.0154973	0.00690985	-0.00881232	0.0379922	-0.0441153	0.00996923	-0.11827	0.0122778	-0.0965938	0.0948917	-0.0166063	0.014448	0.00903207	-0.0356092	0.0110419	0.0316801	-0.0365168	-0.0489856	0.0718155	11	11	10	27.6	27.6	24	50.704	0	21.589	262510000	34
CSNK1A1;CSNK1A1L	Casein kinase I isoform alpha;Casein kinase I isoform alpha-like	P48729-3;Q8N752	P48729-3;Q8N752		-0.231774	0.030238	0.0574133	-0.0279195	-0.0166106	-0.0807776	-0.00188047	0.0488271	-0.217299	0.135782	-0.0766926	-0.0678418	0.0690332	0.289894	0.0854118	0.016572	-0.0476877	0.0464879	-0.0946659	0.0271213	8	8	1	26.2	26.2	6.5	37.567	0	17.247	149170000	13
CSNK1E	Casein kinase I isoform epsilon	P49674	P49674		0.047949	-0.00476474	0.152955	0.0202808	0.0313477	-0.156064	-0.0592786	-0.144442	-0.0247983	-0.108803	0.169961	-0.129243	-0.00389232	0.128036	-0.16103	0.130956	0.0203474	0.047927	0.00603895	-0.0198522	4	4	2	11.3	11.3	6.5	47.315	0	7.1678	59176000	8
CSNK2A2	Casein kinase II subunit alpha	P19784	P19784		0.0762739	0.0065524	-0.0129209	-0.0138496	0.0599855	-0.0454097	-0.093267	0.150539	0.0861187	-0.12733	-0.0350302	-0.0870114	-0.0281234	0.0301567	0.13899	-0.0858008	-0.0268205	-0.0541181	0.0246667	-0.0199699	9	9	9	33.7	33.7	33.7	41.213	0	23.606	201770000	24
CSNK2A3;CSNK2A1	Casein kinase II subunit alpha 3;Casein kinase II subunit alpha	Q8NEV1;P68400;P68400-2	Q8NEV1;P68400;P68400-2		0.0866809	-0.0786722	0.149853	-0.0646896	0.0430917	-0.0127421	-0.130476	-0.209127	0.124207	-0.0238368	0.145356	-0.0233141	-0.0161543	-0.163515	-0.0562787	0.0617597	0.00708213	0.0111442	-0.0191123	0.112375	8	8	8	26.3	26.3	26.3	45.219	0	43.151	356870000	32
CSNK2B	Casein kinase II subunit beta	P67870	P67870		0.157625	-0.0582419	0.0528102	0.0466019	0.0477101	0.0758245	-0.0375018	-0.0629871	0.0993836	-0.0340747	0.043112	-0.0228758	-0.14084	-0.0538513	-0.0563802	0.0438712	-0.0352469	-0.0810028	-0.00976668	-0.0305386	3	3	3	15.3	15.3	15.3	24.942	0	35.842	281320000	16
CSRP1	Cysteine and glycine-rich protein 1	P21291	P21291		-0.0114656	0.161723	0.0244725	-0.0566383	-0.0216677	-0.00719466	0.0609763	0.189158	-0.123033	0.0529558	-0.104227	0.158906	0.0258788	0.102022	-0.0107375	-0.138925	-0.1487	-0.0532337	-0.120777	-0.0358631	6	6	6	50.8	50.8	50.8	20.567	0	61.654	630150000	60
CSRP2	Cysteine and glycine-rich protein 2	Q16527	Q16527		-0.0812798	0.0203338	-0.0716154	0.0108165	-0.0288951	0.0626596	-0.0626642	0.124342	-0.00549996	0.0205247	-0.0521522	0.0379384	-0.0186726	0.106392	0.0268158	-0.0514311	-0.0332322	-0.0650454	-0.000730321	0.00502521	6	6	6	37.8	37.8	37.8	20.954	0	57.69	645200000	30
CSTB	Cystatin-B	P04080	P04080		-0.00785431	-0.0706226	0.0363361	-0.0222518	-0.048882	0.024551	-0.0183771	-0.0433274	0.031128	-0.000749681	-0.0243035	-0.0385459	-0.0580887	-0.0543855	-0.0736753	0.0162067	0.0365036	0.125686	0.0928513	0.0414321	4	4	3	58.2	58.2	33.7	11.139	0	25.008	688260000	37
CSTF2	Cleavage stimulation factor subunit 2	P33240-2;P33240	P33240-2;P33240		-0.0536031	0.106432	-0.0232404	-0.171428	-0.00827561	0.138175	-0.157233	0.11838	-0.0198555	0.0740288	-0.04209	0.285933	0.00967741	-0.117414	0.135962	-0.010366	-0.0669712	-0.0849084	-0.0520133	-0.117559	8	8	6	16.2	16.2	12.5	59.251	0	23.959	410860000	40
CSTF2T	Cleavage stimulation factor subunit 2 tau variant	Q9H0L4	Q9H0L4		-0.235769	0.121923	-0.123647	0.00927639	-0.103028	-0.156336	0.0410842	0.135324	-0.176988	-0.0250328	-0.0518755	-0.057448	0.0588397	0.535391	0.19633	-0.108272	-0.0238266	-0.0178867	0.105256	-0.179683	5	3	3	10.2	6.8	6.8	64.436	0	5.2449	70720000	8
CSTF3	Cleavage stimulation factor subunit 3	Q12996;Q12996-2;Q12996-3	Q12996;Q12996-2		-0.135816	-0.336726	-0.0462251	-0.160391	-0.0591463	0.0237137	0.112686	-0.203715	0.144343	0.00835419	-0.292193	-0.145122	0.0104882	0.119293	0.132921	-0.0322587	0.0367249	0.166058	0.414546	0.186097	3	3	2	5.4	5.4	3.2	82.921	0.00030979	3.5259	30202000	3
CTBP1	C-terminal-binding protein 1	Q13363-2;Q13363	Q13363-2;Q13363		-0.00307253	0.258057	0.0553057	0.142435	0.0934931	0.0598036	0.100342	-0.00327969	-0.044379	0.0698996	0.00840187	-0.0371058	-0.0899432	-0.4761	-0.719983	-0.0118503	0.11558	-0.00605368	0.271213	0.160867	8	4	4	18.4	11	11	46.404	0	6.6162	67042000	6
CTBP2	C-terminal-binding protein 2	P56545;P56545-3;P56545-2	P56545;P56545-3;P56545-2		-0.108489	0.0509304	-0.123685	-0.161996	-0.127983	-0.20274	-0.0388272	0.0383039	0.00446868	-0.0115751	0.027226	0.099108	0.0327161	0.229233	0.0151342	0.0595127	0.0390238	0.0717009	0.0710833	-0.0195147	8	8	4	15.3	15.3	8.1	48.944	0	12.583	321830000	23
CTDP1	RNA polymerase II subunit A C-terminal domain phosphatase	Q9Y5B0-4;Q9Y5B0	Q9Y5B0-4;Q9Y5B0		-0.0797729	0.1365	-0.129116	0.011029	-0.0437904	-0.0690856	-0.111061	-0.052303	-0.150191	-0.00249405	-0.135823	0.234984	-0.0285048	-0.0355048	0.0857546	0.146721	0.113391	0.136739	-0.0163698	-0.0674695	7	7	7	7.7	7.7	7.7	93.484	0	10.564	119510000	13
CTNNA1	Catenin alpha-1	P35221;P35221-2;P35221-3;P26232-4;P26232-6;P26232-2;P26232-5;P26232;P26232-3	P35221;P35221-2;P35221-3		-0.00821957	-0.118327	-0.01594	-0.0156624	0.0158915	-0.0788884	-0.113076	-0.0126262	0.0598851	0.0131558	0.0969614	-0.0732096	0.0217396	-0.000820458	-0.0332219	0.025557	0.04473	0.0281393	0.0267363	0.080826	17	17	17	21.6	21.6	21.6	100.07	0	57.274	887210000	61
CTNNB1	Catenin beta-1	P35222	P35222		-0.00851658	-0.00314862	0.0312189	0.0686545	-0.0499448	0.0689212	-0.0150114	-0.0076741	0.0627763	0.00242758	0.0247976	-0.120649	-0.0269087	-0.0287988	0.0543594	-0.0442589	-0.0516421	0.01212	-0.0705416	0.0454501	9	9	8	12.7	12.7	11.7	85.496	0	31.753	271870000	26
CTNNBL1	Beta-catenin-like protein 1	Q8WYA6-4;Q8WYA6;Q8WYA6-3;Q8WYA6-2	Q8WYA6-4;Q8WYA6;Q8WYA6-3;Q8WYA6-2		0.0244352	-0.227383	-0.0666286	-0.123089	0.075706	-0.0080771	0.0873449	-0.0775781	0.0699054	-0.0921126	-0.0197549	-0.0646102	0.106159	-0.0552819	0.120341	0.0491701	0.106053	-0.0221184	0.0317108	0.0294393	5	5	5	8.6	8.6	8.6	61.97	0	12.033	207420000	15
CTNND1	Catenin delta-1	O60716-5;O60716-3;O60716-2;O60716;O60716-13;O60716-11;O60716-10;O60716-8;O60716-9;O60716-7;O60716-6;O60716-4;O60716-21;O60716-19;O60716-16;O60716-18;O60716-15;O60716-17;O60716-14;O60716-12;O60716-24;O60716-23;O60716-22;O60716-20;O60716-29;O60716-27;O60716-26;O60716-25;O60716-32;O60716-31;O60716-30;O60716-28;Q9UQB3-2;Q9UQB3	O60716-5;O60716-3;O60716-2;O60716;O60716-13;O60716-11;O60716-10;O60716-8;O60716-9;O60716-7;O60716-6;O60716-4;O60716-21;O60716-19;O60716-16;O60716-18;O60716-15;O60716-17;O60716-14;O60716-12;O60716-24;O60716-23;O60716-22;O60716-20;O60716-29;O60716-27;O60716-26;O60716-25;O60716-32;O60716-31;O60716-30;O60716-28		-0.0999286	0.174054	-0.0316493	-0.0621239	-0.0112366	0.0122363	0.0322583	0.280394	-0.209326	0.00341606	-0.273603	0.266839	-0.0325911	0.202699	0.129191	-0.0575885	-0.0852348	0.0231965	-0.0397866	-0.277585	16	16	15	19	19	18.2	104.15	0	41.473	533320000	35
CTPS1	CTP synthase 1	P17812;P17812-2	P17812;P17812-2		0.00967917	0.0189876	0.0181758	0.0244721	0.0100324	-0.0238535	0.0220687	-0.029676	-0.0248926	-0.00194445	-0.0698143	-0.0298088	-0.00527973	-0.0143978	0.000156701	0.00912428	0.0243768	-0.0154225	0.0438243	-0.0221775	19	19	17	32	32	28.4	66.69	0	86.889	1627900000	100
CTPS2	CTP synthase 2	Q9NRF8	Q9NRF8		0.0376311	-1.56757	-0.0659931	0.609187	0.16279	0.0616956	-0.201532	0.691088	0.521755	0.172176	0.19018	-0.230225	0.695101	-0.0933074	-0.704352	0.0447588	0.0848853	-0.0978755	-0.334716	-0.0320494	7	5	5	14	10.4	10.4	65.677	0	5.4597	13123000	6
CTR9	RNA polymerase-associated protein CTR9 homolog	Q6PD62	Q6PD62		-0.132396	0.177587	0.0293122	0.0248949	-0.00296707	-0.227229	0.111322	-0.403383	0.0203899	0.0962488	0.198005	-0.243785	-0.0810414	0.0299434	0.0579144	-0.0574809	0.00485709	0.0918936	0.139942	0.109605	6	6	6	5.5	5.5	5.5	133.5	0	11.773	113550000	12
CTSA	Lysosomal protective protein;Lysosomal protective protein 32 kDa chain;Lysosomal protective protein 20 kDa chain	P10619-2;P10619	P10619-2;P10619		0.104802	-0.00392157	-0.0972509	-0.00680245	0.0785043	0.0123975	0.0251474	0.232044	0.00671124	-0.00478639	0.0643355	-0.0974164	0.0201376	-0.0264847	0.0147758	-0.258201	0.00634763	-0.216422	-0.0233322	0.113045	4	4	4	9.5	9.5	9.5	52.488	0	11.043	89941000	14
CTSB	Cathepsin B;Cathepsin B light chain;Cathepsin B heavy chain	P07858	P07858		0.00200227	-0.0486754	0.0598057	-0.0603553	0.0772399	0.0130281	-0.0234644	0.118523	-0.052485	-0.00523539	-0.0226922	0.0961898	0.107796	-0.0294847	0.0636257	-0.0448908	-0.0734671	-0.0134329	-0.107005	-0.113392	5	5	5	14.7	14.7	14.7	37.821	0	11.513	239060000	20
CTSD	Cathepsin D;Cathepsin D light chain;Cathepsin D heavy chain	P07339	P07339		0.027017	-0.0591736	-0.031075	0.067392	-0.0122397	0.093931	0.0199666	-0.0329607	0.00209832	-0.0502385	0.00391883	-0.0879412	0.0196093	-0.0364239	-0.0760669	0.0251029	0.00889108	-0.0161854	0.0285987	0.0494099	11	11	11	32.3	32.3	32.3	44.552	0	26.45	1047100000	86
CTSZ	Cathepsin Z	Q9UBR2	Q9UBR2		-0.0139461	0.224806	-0.0547199	0.0165702	0.0362137	0.0548504	0.0655346	0.197234	-0.02838	0.0334913	-0.0379022	0.171548	-0.00727759	0.0397224	0.0815397	0.0229757	-0.209997	-0.152197	-0.253954	-0.242482	6	6	6	19.5	19.5	19.5	33.868	0	38.824	638270000	30
CTTN	Src substrate cortactin	Q14247;Q14247-3;Q14247-2	Q14247;Q14247-3;Q14247-2		-0.121671	0.272705	-0.0495385	-0.0498169	-0.0315216	0.0938675	0.0472499	0.213034	-0.223696	0.116559	-0.156276	0.330965	0.0490754	0.153373	0.137015	-0.120255	-0.275747	-0.0556585	-0.169085	-0.216948	29	29	29	49.5	49.5	49.5	61.585	0	130.78	4054100000	168
CTTNBP2NL	CTTNBP2 N-terminal-like protein	Q9P2B4	Q9P2B4		-0.342624	0.200855	-0.12601	-0.0503886	-0.14368	0.273606	0.0544382	0.0148557	-0.290099	0.210627	-0.0810592	0.366868	0.0167933	0.219524	0.138488	-0.0869518	-0.179036	0.0113178	-0.0831757	-0.180719	2	2	2	3.1	3.1	3.1	70.157	0	5.0382	44681000	4
CUL1	Cullin-1	Q13616	Q13616		0.0229428	0.00777048	0.0116791	-0.00688314	0.0167976	-0.0665315	0.00871888	-0.0161322	-0.0644281	-0.0512896	-0.0387267	-0.0344296	-0.00684004	0.127945	0.0797777	-0.00393562	-0.0274974	0.0184167	-0.00484867	-0.0288745	13	13	13	15.9	15.9	15.9	89.677	0	24.666	431110000	29
CUL2	Cullin-2	Q13617;Q13617-2	Q13617;Q13617-2		-0.0139464	0.0177067	0.0171245	-0.0142493	0.0281482	0.0480962	0.00883332	-0.031556	-0.0162572	-0.0512792	-0.0200814	-0.00726518	0.00715312	-0.071935	-0.0754147	0.0125334	0.0610321	-0.031433	0.00476818	0.0716523	12	12	12	15.8	15.8	15.8	86.982	0	20.853	258560000	27
CUL3	Cullin-3	Q13618-2;Q13618;Q13618-3	Q13618-2;Q13618;Q13618-3		0.0303725	0.050797	0.0470611	0.0372994	-0.0108315	0.0296586	0.0121109	-0.03333	0.0340956	-0.0367263	0.0137157	-0.0179732	-0.0852343	-0.135123	-0.00857943	-0.0816298	0.0158592	0.0844173	-0.0479902	0.0456607	12	12	12	17.2	17.2	17.2	86.233	0	30.881	281300000	30
CUL4A	Cullin-4A	Q13619;Q13619-2	Q13619;Q13619-2		-0.0859677	-0.0176926	-0.0216481	-0.0860744	-0.0850738	0.140252	-0.0511338	-0.157032	0.0349677	-0.0800342	0.0394697	0.221791	-0.0882122	0.342072	0.273028	-0.14054	-0.148391	-0.0346352	-0.0763696	-0.0351459	9	2	2	11.2	2.4	2.4	87.679	0	5.0879	26200000	4
CUL4B	Cullin-4B	Q13620-1;Q13620;Q13620-3	Q13620-1;Q13620;Q13620-3		0.0010055	-0.0495396	0.00812006	0.0202852	0.0318629	-0.0414498	-0.00581312	-0.0556753	0.0537331	-0.0297755	0.0136082	-0.0272989	0.0148323	-0.0642101	0.00987539	-0.0373437	0.029274	0.0315527	0.0356607	0.00492668	23	23	16	24.8	24.8	17.3	102.3	0	57.73	856230000	68
CUL5	Cullin-5	Q93034	Q93034		0.0309155	0.0831565	-0.0482957	-0.147247	-0.00208893	-0.075003	-0.161873	-0.257842	-0.00336719	0.00231266	-0.0931482	0.145469	0.00939722	-0.112543	0.0219744	0.211203	0.054303	-0.00979685	0.0845611	0.211544	8	8	8	10.1	10.1	10.1	90.954	0	15.553	149940000	13
CUTA	Protein CutA	O60888-3;O60888;O60888-2	O60888-3;O60888;O60888-2		-0.0180034	-0.552117	0.0731353	-0.423862	0.457832	0.161313	-0.145198	0.103578	0.630538	0.297841	0.025932	-0.213751	-0.492782	-1.12827	0.0341687	0.213648	0.686644	-0.0657119	0.158857	0.139838	3	3	3	37.8	37.8	37.8	16.832	0	13.896	81346000	33
CWC15	Spliceosome-associated protein CWC15 homolog	Q9P013	Q9P013		-0.416308	0.292297	-0.234654	-0.398371	0.00992984	0.0501063	0.195633	0.389966	-0.391308	0.248527	-0.10688	0.446554	0.183546	0.245926	0.28774	-0.246159	-0.127583	-0.117849	-0.179438	-0.188046	8	8	8	29.7	29.7	29.7	26.624	0	27.519	454780000	22
CWF19L1	CWF19-like protein 1	Q69YN2-3;Q69YN2;Q69YN2-2	Q69YN2-3;Q69YN2;Q69YN2-2		0.0827691	0.0232909	-0.0177485	0.0219597	0.0715609	-0.0326175	0.0616725	-0.00539303	0.0421053	-0.0751158	-0.050375	0.195653	-0.0488862	-0.0127781	0.0466508	-0.0869159	0.0378354	-0.110878	-0.214821	0.015663	8	8	8	22.2	22.2	22.2	45.536	0	20.199	155580000	13
CXADR	Coxsackievirus and adenovirus receptor	P78310-2;P78310-6;P78310;P78310-7;P78310-5;P78310-4;P78310-3	P78310-2;P78310-6;P78310;P78310-7;P78310-5		0.0351283	0.0203165	-0.0425636	0.00658503	-0.104484	0.0289279	0.0842112	-0.0765338	0.0645521	0.111657	0.0369124	0.0729506	-0.0766848	-0.0367801	-0.0969473	-0.00318947	-0.0120369	-0.0533106	-0.00642185	-0.00865811	5	5	5	16	16	16	38.123	0	10.07	130310000	19
CYB5A	Cytochrome b5	P00167-2;P00167;P00167-3	P00167-2;P00167;P00167-3		0.0629699	-0.067679	0.022265	0.0254409	0.0437575	0.0364372	0.0178963	0.0665439	-0.00652432	0.0428815	-0.044275	-0.112126	-0.0218018	-0.144593	-0.0567377	-0.0814844	0.106125	-0.0742877	0.0443506	0.0844718	6	6	6	76.5	76.5	76.5	11.268	0	42.58	238540000	18
CYB5B	Cytochrome b5 type B	O43169	O43169		-0.0847718	0.0707015	-0.213487	-0.0290318	-0.087416	-0.219793	0.048868	0.16654	-0.199805	-0.00493421	-0.162663	0.121815	-0.000371173	0.283833	0.114555	0.0364586	0.112215	0.107626	0.132863	-0.249572	3	3	3	19.2	19.2	19.2	16.332	0	17.875	256990000	12
CYB5R3	NADH-cytochrome b5 reductase 3;NADH-cytochrome b5 reductase 3 membrane-bound form;NADH-cytochrome b5 reductase 3 soluble form	P00387-2;P00387;P00387-3	P00387-2;P00387;P00387-3		0.114327	-0.0742839	-0.000732526	0.0460968	0.0403704	-0.00851398	-0.0098401	-0.112664	0.095171	-0.0430166	0.000781655	-0.0320173	-0.107236	-0.138349	-0.045095	0.0122983	0.0716778	0.0271397	0.0525525	0.0549644	7	7	7	31.7	31.7	31.7	31.628	0	21.992	479220000	49
CYBA	Cytochrome b-245 light chain	P13498	P13498		0.051926	-0.055025	-0.00112505	-0.148317	-0.0459825	0.0118741	-0.0442254	0.0152121	-0.0953861	-0.0405472	-0.0449467	0.0619238	-0.025508	0.127608	-0.0928031	0.0119306	-0.00249001	0.050816	0.114769	0.0939273	2	2	2	12.8	12.8	12.8	21.012	0	4.8056	87637000	6
CYC1	Cytochrome c1, heme protein, mitochondrial	P08574	P08574		0.0143138	-0.134156	0.0616515	0.020985	0.0722022	-0.0166955	-0.00162193	-0.143929	0.00574505	-0.0437184	0.0231676	-0.0752775	0.0393215	0.0182521	0.0466355	0.00200281	-0.0231335	0.0451547	-0.00509004	0.0378217	7	7	7	30.2	30.2	30.2	35.422	0	27.191	438500000	33
CYCS	Cytochrome c	P99999;CON__P62894	P99999		0.0246066	0.0342775	0.0326501	-0.0266188	-0.00107355	-0.0229184	0.0231191	-0.0556833	-0.0821639	-0.000374127	-0.102482	0.0639111	-0.0018879	0.0177578	0.0433642	-0.00944243	-0.00713584	0.0161972	-0.00929976	0.006827	7	7	7	61.9	61.9	61.9	11.749	0	40.237	895500000	48
CYFIP1	Cytoplasmic FMR1-interacting protein 1	Q7L576;Q7L576-2;Q7L576-3	Q7L576;Q7L576-2		-0.240164	0.124384	-0.161154	-0.299074	-0.000627808	-0.010112	0.114459	0.381718	-0.219419	0.0570613	-0.140453	0.187791	0.122521	0.217164	0.218802	-0.0355867	-0.0909577	0.0174364	-0.0821236	-0.218033	14	4	4	11.7	3.9	3.9	145.18	0	10.207	213150000	11
CYFIP2	Cytoplasmic FMR1-interacting protein 2	Q96F07-2;Q96F07	Q96F07-2;Q96F07		0.0109843	-5.85914e-05	0.0199445	0.0948528	-0.00909681	-0.00973764	-0.0416085	-0.135395	0.0203389	-0.0986798	-0.0675201	0.105248	-0.0252119	0.0907149	0.00146854	0.0318938	-0.0214696	0.0195016	-0.0988925	0.0563534	14	14	4	11	11	3.2	145.67	0	24.776	382870000	35
CYP51A1	Lanosterol 14-alpha demethylase	Q16850;Q16850-2	Q16850;Q16850-2		-0.0128763	0.00881284	0.0871494	0.0861386	0.0225311	0.0264336	-0.0589001	0.00327921	-0.0500515	-0.0458984	-0.0417762	-0.0670573	-0.0204671	0.160207	-0.0392081	0.00697574	-0.100764	-0.0106409	0.011759	-0.0220153	10	10	10	22.1	22.1	22.1	56.805	0	37.506	238500000	19
CYR61	Protein CYR61	O00622	O00622		-0.219172	-0.13049	-0.0566804	-0.173184	-0.100877	-0.0556648	-0.064286	-0.0240593	0.00543666	-0.0676445	-0.0233431	0.0362137	-0.0609853	0.187503	-0.0707561	-0.307894	0.148324	0.270855	0.372582	0.277752	7	7	7	17.3	17.3	17.3	42.026	0	22.59	424910000	18
DAD1	Dolichyl-diphosphooligosaccharide--protein glycosyltransferase subunit DAD1	P61803	P61803		0.124173	0.0740203	0.0271453	0.0851727	-0.0415224	0.0546347	-0.039898	0.0204712	-0.0105722	-0.0163631	0.0238072	0.0574783	0.0141952	-0.0417902	0.0116315	0.0667274	-0.144796	-0.0346944	-0.171596	-0.114594	3	3	3	28.3	28.3	28.3	12.497	0	27.895	314080000	18
DAK	Bifunctional ATP-dependent dihydroxyacetone kinase/FAD-AMP lyase (cyclizing);ATP-dependent dihydroxyacetone kinase;FAD-AMP lyase (cyclizing)	Q3LXA3;Q3LXA3-2	Q3LXA3		-0.261485	0.136347	-0.295186	-0.0911599	0.0527895	-0.0258199	0.0883825	0.0254989	0.01973	0.166268	0.0586762	0.053243	-0.059579	-0.0764084	0.0373939	0.163826	-0.0284452	0.0538888	0.129698	-0.204027	3	3	3	7.8	7.8	7.8	58.946	0	5.6292	40533000	7
DAP3	28S ribosomal protein S29, mitochondrial	P51398-2;P51398-3;P51398	P51398-2;P51398-3;P51398		0.134217	-0.000293314	0.17771	0.0274014	0.0536282	-0.0542419	-0.229698	-0.0423956	0.0230482	0.0308825	0.122446	-0.0968363	-0.130105	-0.113984	0.0795993	0.0761176	-0.0966811	0.130814	-0.109295	-0.0387041	6	6	6	19.9	19.9	19.9	41.044	0	15.405	88226000	16
DARS	Aspartate--tRNA ligase, cytoplasmic	P14868;P14868-2	P14868;P14868-2		0.0635933	-0.0213975	0.0544215	0.0154831	0.0274761	-0.000506546	-0.00700656	-0.0461132	0.041118	-0.0467165	-0.0157024	-0.0482964	-0.044551	-0.0461875	-0.0237687	0.0360602	0.0164814	-0.0120244	0.0187449	-0.0174774	23	23	23	50.7	50.7	50.7	57.136	0	153.49	3022000000	189
DARS2	Aspartate--tRNA ligase, mitochondrial	Q6PI48	Q6PI48		-0.0454534	0.0991643	-0.0361578	0.0931558	0.0353661	0.0261698	-0.143687	-0.0637012	-0.0665745	-0.040238	-0.0354505	-0.143236	-0.0156507	-0.0767172	0.0489725	-0.00578251	-0.0284011	0.0896203	0.171261	0.0809702	9	9	9	14.4	14.4	14.4	73.562	0	23.583	231470000	15
DAZAP1	DAZ-associated protein 1	Q96EP5-2;Q96EP5	Q96EP5-2;Q96EP5		-0.0691837	0.105516	-0.111538	-0.139866	0.0553598	-0.0126247	0.0756097	0.153966	-0.156765	-0.0141598	-0.106689	0.186561	0.10222	0.165583	0.146476	-0.106163	-0.109263	-0.0893959	-0.0931254	-0.0388851	7	7	7	26.2	26.2	26.2	40.529	0	39.266	780090000	37
DBI	Acyl-CoA-binding protein	P07108;P07108-3;P07108-2;P07108-6;P07108-4;P07108-5	P07108;P07108-3;P07108-2;P07108-6;P07108-4;P07108-5		0.29905	0.287507	0.120654	0.202236	0.0599297	0.230611	-0.0177494	0.326704	-0.322056	0.240586	-0.458315	0.420487	-0.261973	0.414632	-0.299429	0.0875752	-0.475736	-0.495264	-0.270753	-0.145065	2	2	2	17.2	17.2	17.2	10.044	0.00059172	3.0487	87397000	7
DBN1	Drebrin	Q16643;Q16643-2;Q16643-3	Q16643;Q16643-2;Q16643-3		-0.129256	0.140563	-0.0446437	0.0444563	0.00994024	-0.0762719	0.0907266	0.183667	-0.254246	0.00808668	-0.299074	0.179712	0.0979168	0.251695	0.19207	0.0841613	-0.0963208	0.0251777	-0.128562	-0.336168	8	8	8	13.1	13.1	13.1	71.428	0	27.114	312370000	27
DBNL	Drebrin-like protein	Q9UJU6;Q9UJU6-5	Q9UJU6;Q9UJU6-5		-0.114042	0.259062	-0.00185481	-0.0148056	-0.0296418	0.100003	0.0210048	0.12045	-0.243077	0.000596713	-0.104781	0.206495	0.0515579	0.171735	0.0518786	-0.0365201	-0.157156	-0.0617514	-0.102082	-0.173439	15	15	1	42.1	42.1	2.8	48.207	0	90.73	1490400000	94
DBR1	Lariat debranching enzyme	Q9UK59;Q9UK59-2	Q9UK59;Q9UK59-2		-0.0796159	0.260152	-0.0990075	-0.0888021	-0.297219	-0.199717	0.21158	-0.2655	0.0126998	-0.165473	-0.119625	-0.0367168	-0.0416487	0.223544	0.0960671	-0.0175572	0.248625	0.0159385	0.191565	0.0943419	4	4	4	8.8	8.8	8.8	61.554	0	5.2775	53420000	6
DCAF7	DDB1- and CUL4-associated factor 7	P61962;P61962-2	P61962		-0.0115081	-0.0310721	-0.133459	-0.132214	-0.0843503	-0.141812	-0.192659	0.0775654	0.202916	0.00701399	0.339865	-0.0994377	0.0460772	0.0795502	-0.114554	-0.0529916	-0.065886	-0.0236435	0.0663861	0.207844	6	6	6	20.5	20.5	20.5	38.926	0	27.297	186560000	17
DCD	Dermcidin;Survival-promoting peptide;DCD-1	P81605;P81605-2	P81605;P81605-2		0.0428438	0.39794	-0.0197739	-0.000462815	0.185258	0.0999674	0.0478588	-0.17763	-0.928658	-0.0734255	-0.233524	0.145072	-0.0400758	0.544254	0.131024	0.153794	0.0514876	-0.302306	0.0779705	-0.157983	2	2	2	16.4	16.4	16.4	11.284	0.0049223	1.8365	86345000	3
DCK	Deoxycytidine kinase	P27707	P27707		0.248375	-0.659308	0.0582733	0.125733	0.436569	0.0666949	0.290771	-0.284352	0.40393	0.195388	0.0739648	-0.544649	-0.0835336	-0.797214	-0.175077	0.189949	-0.107186	0.273569	0.0146698	0.217061	2	2	2	10.8	10.8	10.8	30.518	0.00030157	3.2675	27211000	7
DCPS	m7GpppX diphosphatase	Q96C86	Q96C86		-0.0148686	0.0500992	-0.0682402	0.103114	0.0469413	0.0747886	-0.0456657	0.110938	-0.037814	-0.119339	0.160103	-0.306726	0.0900541	-0.00799686	0.0934969	-0.113998	-0.0263846	-0.0781945	-0.161336	0.194659	4	4	4	13.6	13.6	13.6	38.608	0	10.925	76931000	9
DCTN1	Dynactin subunit 1	Q14203-3;Q14203-4;Q14203-6;Q14203;Q14203-5;Q14203-2	Q14203-3;Q14203-4;Q14203-6;Q14203;Q14203-5;Q14203-2		0.0200001	-0.0649001	0.0496054	0.0498677	-0.000747688	0.00573831	-0.046566	-0.0642436	0.0197493	0.0114502	-0.0361512	0.0314612	0.032219	-0.0500372	-0.0425286	-0.0419981	-0.0116698	0.0154835	0.0524124	0.0144858	27	27	26	26.2	26.2	25.4	136.82	0	113.71	843510000	63
DCTN2	Dynactin subunit 2	Q13561;Q13561-3;Q13561-2	Q13561;Q13561-3;Q13561-2		0.0162428	0.0212168	0.0319764	-0.0336515	0.0143549	0.0299132	0.0217463	-0.0129581	0.0282485	0.0567852	-0.0349241	0.0183279	-0.0978047	-0.0566756	0.0177977	0.00929689	-0.00430158	-0.0306941	-0.0154447	-0.0358217	14	14	14	45.9	45.9	45.9	44.23	0	82.542	1120200000	65
DCTN3	Dynactin subunit 3	O75935-3;O75935;O75935-2	O75935-3;O75935;O75935-2		0.0368008	0.0503522	0.0489195	0.0217122	-0.0496103	0.0154913	0.0402658	-0.0671077	0.0321735	-0.0861414	0.00982904	0.0227397	-0.00287256	0.047636	0.00761163	-0.00601425	-0.0410986	-0.0254455	-0.0808313	-0.0307795	7	7	7	38	38	38	18.001	0	13.055	333910000	24
DCTN4	Dynactin subunit 4	Q9UJW0;Q9UJW0-3;Q9UJW0-2	Q9UJW0;Q9UJW0-3;Q9UJW0-2		0.00913176	-0.0455399	0.218276	-0.283186	0.00491018	-0.0121529	-0.285826	-0.222953	0.038255	0.0172854	0.258632	0.175764	-0.0255224	-0.17368	-0.061653	0.0844044	0.0723924	0.0922063	0.0352268	0.0476609	7	7	7	18	18	18	52.337	0	25.183	169810000	25
DCTPP1	dCTP pyrophosphatase 1	Q9H773	Q9H773		-0.092866	0.024736	-0.121719	-0.203523	-0.0456607	0.0522388	-0.032596	0.162784	0.020852	0.053065	0.0611442	-0.0572404	-8.92654e-05	-0.0306612	0.0588056	-0.0225845	0.0136066	-0.0179358	0.124557	-0.00328338	9	9	9	55.9	55.9	55.9	18.681	0	62.363	615950000	31
DCUN1D1	DCN1-like protein 1	Q96GG9	Q96GG9		0.0588867	-0.0490496	0.166683	-0.275771	0.24538	0.0172048	0.0530187	0.235765	0.373592	0.0153255	-0.0812351	0.0274273	-0.0958036	-0.742947	-0.119909	0.0140208	0.0840357	0.0706617	0.085567	-0.139223	3	3	3	10.8	10.8	10.8	30.124	0	3.929	48991000	4
DCUN1D5	DCN1-like protein 5	Q9BTE7	Q9BTE7		0.0484277	0.0254954	0.0829243	-0.0375533	0.0287461	-0.0224776	0.0927156	0.214975	0.0204374	-0.112679	0.0735513	-0.398809	-0.0704721	0.0451075	-0.0269794	0.18107	0.0079315	0.00676837	-0.105849	-0.1097	2	2	2	7.6	7.6	7.6	27.508	0.00030093	3.2455	82468000	6
DCXR	L-xylulose reductase	Q7Z4W1	Q7Z4W1		0.0511828	-0.0287421	0.155921	0.0463203	-0.0374075	0.0161032	0.0155194	-0.16578	0.028532	-0.00215931	0.0293036	-0.0784065	-0.0307508	-0.00927299	-0.00583375	0.0384398	-0.0447458	0.034546	-0.0178426	-0.0512964	6	6	6	31.6	31.6	31.6	25.913	0	49.533	407320000	36
DDAH1	N(G),N(G)-dimethylarginine dimethylaminohydrolase 1	O94760;O94760-2	O94760		-0.0616868	0.0362772	-0.0058157	0.0255374	0.0251618	-0.155701	0.0475805	0.0355887	0.016485	0.0501914	-0.0243201	0.0161794	-0.0785501	0.0984195	-0.0892617	-0.0255808	0.076649	-0.0299609	0.00196572	-0.0155284	9	9	9	33.7	33.7	33.7	31.121	0	23.06	503840000	26
DDAH2	N(G),N(G)-dimethylarginine dimethylaminohydrolase 2	O95865	O95865		-0.180966	0.0581235	-0.109925	0.0374562	0.0399434	0.048578	-0.0676178	0.252254	-0.107884	0.0746175	0.0996974	-0.330204	-0.180219	0.122518	-0.163832	0.0331081	-0.0347843	0.137358	0.225128	-0.00971973	4	4	4	20.7	20.7	20.7	29.644	0	10.317	85097000	9
DDB1	DNA damage-binding protein 1	Q16531;Q16531-2	Q16531		0.0326006	0.0499238	0.0479161	0.023752	-0.00394764	-0.0347665	-0.000479043	-0.0564542	0.00106549	-0.0673103	0.0202822	-0.0143221	-0.00841455	0.00281411	0.00376636	0.009974	-0.0227167	0.0280373	-0.0292129	-0.0388772	35	35	35	30.6	30.6	30.6	126.97	0	107.56	2526900000	145
DDI2	Protein DDI1 homolog 2	Q5TDH0;Q5TDH0-3;Q5TDH0-2	Q5TDH0;Q5TDH0-3;Q5TDH0-2		-0.13691	0.0965118	0.0640017	-0.0063879	0.0198838	-0.0526974	0.0642049	-0.196929	-0.0965526	-0.0824298	0.0213198	-0.0599792	0.00201873	0.0948256	0.117075	-0.247187	0.127165	0.00547061	-0.0405034	0.25073	6	6	6	17	17	17	44.522	0	9.7048	133590000	18
DDOST	Dolichyl-diphosphooligosaccharide--protein glycosyltransferase 48 kDa subunit	P39656;P39656-3;P39656-2	P39656;P39656-3;P39656-2		0.114778	-0.0985921	0.101675	0.0475334	0.02321	-0.0274034	0.0395615	-0.169793	0.123539	-0.0492908	0.077774	-0.118361	0.0208297	-0.0842251	-0.0256244	0.042081	0.00668588	-0.0522451	-0.0206712	-0.0078308	11	11	11	25	25	25	50.8	0	39.385	1036500000	68
DDRGK1	DDRGK domain-containing protein 1	Q96HY6-2;Q96HY6	Q96HY6-2;Q96HY6		-0.0710177	0.0180466	-0.0668434	0.0901734	0.0396403	-0.00614934	0.0148865	0.147353	-0.0156903	-0.0226686	-0.00897664	0.0832053	-0.00443363	0.0978079	-0.0980747	-0.0582281	-0.0235661	-0.0346837	0.00278282	-0.139933	4	4	4	16.9	16.9	16.9	35.475	0	48.755	348640000	20
DDT;DDTL	D-dopachrome decarboxylase;D-dopachrome decarboxylase-like protein	P30046;P30046-2;A6NHG4	P30046;P30046-2;A6NHG4		0.0309624	-0.0324163	-0.020744	-0.0188223	-0.0352137	-0.0698863	-0.0772445	-0.0614882	0.0503038	-0.0198095	0.0446539	-0.06337	0.0190209	0.0614414	0.083783	0.0224114	0.0234051	-0.0505224	0.0135314	0.0436343	8	8	8	62.7	62.7	62.7	12.712	0	58.311	1390300000	46
DDX1	ATP-dependent RNA helicase DDX1	Q92499;Q92499-3;Q92499-2	Q92499;Q92499-3;Q92499-2		0.0433611	-0.0583476	0.0342698	0.0331808	0.0264395	-0.0256921	-0.0085597	-0.0213755	0.00241506	-0.0274075	-0.030958	-0.0255499	-0.0367929	-0.00266844	-0.00368494	-0.00041838	0.0148306	0.0411477	0.016446	-0.0270052	24	24	24	36.6	36.6	36.6	82.431	0	100.57	2754400000	112
DDX17	Probable ATP-dependent RNA helicase DDX17	Q92841;Q92841-1;Q92841-3;Q92841-2	Q92841;Q92841-1;Q92841-3;Q92841-2		-0.0575825	-0.123059	-0.0625135	-0.0633584	0.0643662	0.0846661	0.0249403	-0.0185208	0.019771	-0.00231533	0.00102568	0.0472586	0.000830553	0.0199575	0.0225509	0.0308023	0.00338939	-0.0327382	0.0176241	-0.0334641	33	24	24	48.6	38	38	80.272	0	172.15	2169700000	133
DDX18	ATP-dependent RNA helicase DDX18	Q9NVP1	Q9NVP1		0.0296633	-0.137564	-0.166685	0.0581271	0.0727325	-0.0361351	-0.00193539	0.0531524	0.0780489	-0.114567	0.0180896	-0.425795	0.0488202	-0.0389377	0.107863	0.122629	0.0757302	-0.000506155	0.0568066	0.144095	5	5	5	7.9	7.9	7.9	75.406	0	5.5111	75728000	8
DDX19B	ATP-dependent RNA helicase DDX19B	Q9UMR2-2;Q9UMR2-4;Q9UMR2	Q9UMR2-2;Q9UMR2-4;Q9UMR2		-0.0188422	-0.0176991	0.021039	0.0123902	-0.0462218	-0.0538607	-0.0245457	0.00588769	-0.052422	-0.00907679	0.00367898	-0.0538192	-0.0198793	0.183653	0.00623661	0.0037611	-0.00872979	0.0203643	0.00415363	-0.0124373	11	11	2	26.1	26.1	6	50.489	0	75.723	860180000	56
DDX20	Probable ATP-dependent RNA helicase DDX20	Q9UHI6;Q9UHI6-2	Q9UHI6		-0.0410806	0.104239	0.0906596	-0.0824331	-0.0779732	-0.00375724	-0.149631	0.0702364	0.155591	-0.0213446	0.0856325	0.100142	-0.0896136	0.113835	0.0924865	-0.103277	-0.0863233	-0.0762864	-0.0514213	-0.0860491	9	9	9	13.5	13.5	13.5	92.239	0	28.458	272670000	18
DDX21	Nucleolar RNA helicase 2	Q9NR30;Q9NR30-2	Q9NR30;Q9NR30-2		-0.107859	0.0677491	-0.0222404	-0.00784072	-0.0340969	-0.0389768	-0.0704438	-0.163852	-0.112135	-0.0807522	-0.0844221	0.0607765	-0.0211774	0.179958	0.115926	0.0324574	0.0745173	0.0500579	0.124126	-0.0181419	20	20	19	31.8	31.8	29.9	87.343	0	56.853	573520000	65
DDX23	Probable ATP-dependent RNA helicase DDX23	Q9BUQ8	Q9BUQ8		0.0265225	-0.116264	-0.00809422	-0.112908	-0.0506237	-0.0565059	-0.111246	-0.0738541	0.131073	-0.0414423	0.0533937	-0.0249728	0.0224708	0.14327	0.237803	0.00603618	0.00802276	-0.0892373	0.00792789	-0.0077399	8	8	8	10.4	10.4	10.4	95.581	0	19.042	145830000	16
DDX28	Probable ATP-dependent RNA helicase DDX28	Q9NUL7	Q9NUL7		-0.0571321	-0.0190122	-0.50414	-0.0886697	-0.0402536	0.187906	-0.150981	-0.0132325	0.222866	0.0505842	0.0508487	0.40032	0.123775	-0.4863	-0.0960774	0.275482	0.0171483	-0.0222953	0.0739607	0.0188346	2	2	2	3.5	3.5	3.5	59.58	0.0011498	2.7374	19151000	3
DDX39A	ATP-dependent RNA helicase DDX39A	O00148;O00148-3;O00148-2	O00148;O00148-3;O00148-2		-0.119381	-0.0809419	-0.0669902	0.0511606	0.0591268	-0.0237197	0.00796956	-0.0132986	-0.149192	0.0264057	-0.170056	0.131829	-0.0264434	0.148162	0.161536	-0.0929885	0.0916293	0.0516402	0.0406104	-0.0834272	11	3	3	30.2	6.6	6.6	49.129	0	8.3471	256610000	21
DDX39B	Spliceosome RNA helicase DDX39B	Q13838;Q13838-2	Q13838;Q13838-2		0.0653087	-0.100041	-0.00226985	0.0442905	0.0630984	0.0148159	0.0124873	-0.112595	0.0617963	-0.0571528	0.0712506	-0.127594	-0.026236	-0.113073	-0.0520921	0.0408942	0.0504444	0.018324	0.0414432	0.0505298	15	15	7	49.3	49.3	25.7	48.991	0	111.63	2795600000	106
DDX3X;DDX3Y	ATP-dependent RNA helicase DDX3X;ATP-dependent RNA helicase DDX3Y	O00571;O00571-2;O15523-2;O15523;O15523-3;Q9NQI0-3;Q9NQI0-2;Q9NQI0-4;Q9NQI0	O00571;O00571-2;O15523-2;O15523		-0.131264	0.0311403	-0.0954156	-0.0429119	0.0125376	-0.0250085	0.0646167	0.1356	-0.0807025	0.0581093	-0.0552338	0.155972	0.0226066	0.282245	0.08982	-0.0144021	-0.137156	-0.0552223	-0.071396	-0.200304	33	33	33	49.8	49.8	49.8	73.243	0	189.65	5426500000	232
DDX42	ATP-dependent RNA helicase DDX42	Q86XP3;Q86XP3-2	Q86XP3;Q86XP3-2		0.00705436	0.0427834	0.0496612	0.0316216	-0.0183292	-0.0361352	-0.035027	0.0501864	0.000383377	0.00859146	0.0505173	0.015686	-0.0183148	0.029738	0.0112248	-0.142859	-0.0136331	-0.0248527	-0.0736829	0.00901699	18	18	18	26.3	26.3	26.3	102.97	0	72.392	570090000	71
DDX46	Probable ATP-dependent RNA helicase DDX46	Q7L014	Q7L014		0.0163959	-0.0191966	0.00809488	0.0096819	0.0199172	0.00299525	0.00590715	-0.00425166	-0.0111015	-0.0222053	-0.0595018	0.0154577	-0.00443001	-0.0371496	-0.0150512	-0.00204382	0.0205803	0.0114797	0.034802	-0.02675	31	31	31	27.9	27.9	27.9	117.36	0	85.678	1549700000	126
DDX47	Probable ATP-dependent RNA helicase DDX47	Q9H0S4-2;Q9H0S4	Q9H0S4-2;Q9H0S4		0.0640208	-0.423864	-0.01872	0.0338352	-0.0279617	0.172145	-0.0431312	-0.213186	0.118673	-0.125389	0.160935	-0.134289	0.0539618	-0.0440806	0.0359004	0.0622344	0.173094	0.0166861	0.0107985	0.0719674	3	3	3	9.1	9.1	9.1	45.169	0	13.817	49284000	6
DDX5	Probable ATP-dependent RNA helicase DDX5	P17844;P17844-2	P17844;P17844-2		-0.0451706	-0.120606	-0.090034	-0.0631288	0.080339	-0.0161651	0.0588899	-0.0656183	0.0195582	-0.0522795	-0.0234736	-0.0311499	0.0530965	0.0265329	0.0761167	0.031421	0.0358551	-0.00387549	0.0395421	0.0337801	34	34	25	44.8	44.8	32.2	69.147	0	151.52	3818400000	235
DDX50	ATP-dependent RNA helicase DDX50	Q9BQ39	Q9BQ39		0.366031	-2.23401	-0.149735	-0.00721216	0.63653	0.307706	-0.0241362	0.20549	0.303477	-0.150216	0.0547315	-0.148176	0.296379	-0.259476	0.124236	-0.286504	0.172771	0.538096	-0.292287	0.489938	4	3	3	7.2	5.2	5.2	82.564	0	10.3	42018000	6
DDX52	Probable ATP-dependent RNA helicase DDX52	Q9Y2R4	Q9Y2R4		0.223789	-0.258543	-0.0842592	0.257868	0.302965	-0.522053	-0.107101	-0.041718	0.151362	-0.09394	-0.159336	-0.0112884	0.146959	-0.227788	-0.169408	0.0815931	0.173257	0.0812789	0.170993	0.0290015	2	2	2	3.7	3.7	3.7	67.497	0.002736	2.2763	27178000	5
DDX6	Probable ATP-dependent RNA helicase DDX6	P26196	P26196		-0.00137421	-0.0599912	0.0410417	-0.0155311	-0.00402699	0.25859	-0.0754677	-0.0834082	0.0613194	-0.0918924	0.0453492	-0.0629331	-0.0197949	-0.133648	0.0142975	0.0193693	-0.093202	0.0613061	0.060046	0.0235814	14	14	14	34.8	34.8	34.8	54.416	0	87.928	725220000	50
DEK	Protein DEK	P35659;P35659-2	P35659;P35659-2		-0.0381091	0.0614838	-0.0229127	-0.0631824	0.097746	0.119921	0.07741	0.116535	-0.0590928	0.0212131	-0.117054	0.0534656	0.0885489	-0.0694663	0.12124	0.0270434	-0.128441	-0.116517	-0.105922	-0.120279	14	14	14	32.3	32.3	32.3	42.674	0	56.512	1877400000	113
DENR	Density-regulated protein	O43583	O43583		-0.0641686	0.284669	-0.0417687	-0.000132173	-0.00778418	0.146586	0.0421202	0.110047	-0.120429	0.125601	-0.0524311	0.279526	-0.0128605	-0.0420696	0.113212	-0.142793	-0.260777	-0.0714823	-0.22043	-0.121005	7	7	7	37.4	37.4	37.4	22.092	0	49.501	724540000	40
DFFA	DNA fragmentation factor subunit alpha	O00273;O00273-2	O00273;O00273-2		-0.133317	0.128935	-0.189143	-0.0972445	0.0344142	0.0913085	0.0358645	0.188964	-0.0910687	0.104678	-0.0953804	0.174524	0.0239592	-0.032793	0.123539	0.0289578	-0.0351332	-0.113697	-0.0551824	-0.148554	11	11	11	39.3	39.3	39.3	36.521	0	38.89	478940000	39
DHCR24	Delta(24)-sterol reductase	Q15392-2;Q15392	Q15392-2;Q15392		0.164844	-0.237546	-0.123229	-0.014451	0.0180647	-0.224436	0.173553	0.0421149	0.13333	0.145147	-0.243034	0.0986828	-0.0212409	-0.04518	0.0911241	-0.0597337	0.0234627	0.0208386	0.0761474	-0.0748296	3	3	3	6.1	6.1	6.1	54.75	0	5.8868	38631000	7
DHCR7	7-dehydrocholesterol reductase	Q9UBM7	Q9UBM7		-0.0340657	0.0188372	-0.0895096	0.0822511	-0.026187	0.0229682	-0.0307184	-0.0107421	-0.0270581	-0.0360286	0.00027287	-0.0549947	-0.0357304	0.0792666	-0.0356808	-0.00366287	-0.0299481	0.0452314	0.0924681	0.0166616	5	5	5	12.2	12.2	12.2	54.489	0	18.404	249430000	18
DHFR	Dihydrofolate reductase	P00374-2;P00374;Q86XF0	P00374-2;P00374		0.0643819	0.123708	-0.0600054	0.0496806	-0.00255137	0.0174119	-0.0144961	0.0972676	-0.047755	-0.0698871	-0.182765	0.0876811	0.0679872	-0.0256693	0.0150427	0.0229479	-0.0761042	-0.0742365	0.0120022	-0.0610101	7	7	7	45.2	45.2	45.2	15.672	0	12.852	467200000	19
DHPS	Deoxyhypusine synthase	P49366-2;P49366;P49366-3	P49366-2;P49366;P49366-3		0.446139	-0.87574	0.807689	-0.812043	0.572404	0.386857	-1.03575	0.105985	0.543024	-0.267963	0.134689	0.0415099	-0.2862	-0.727969	-0.304392	0.1737	0.124559	0.0621729	0.416539	0.438413	3	3	3	15.8	15.8	15.8	35.915	0	6.4641	24077000	5
DHRS4	Dehydrogenase/reductase SDR family member 4	Q9BTZ2;Q9BTZ2-7;Q9BTZ2-2;Q9BTZ2-8;Q9BTZ2-4;Q9BTZ2-3;Q9BTZ2-5	Q9BTZ2;Q9BTZ2-7;Q9BTZ2-2;Q9BTZ2-8;Q9BTZ2-4;Q9BTZ2-3;Q9BTZ2-5		-0.101246	-0.0282186	0.143603	-0.0833471	-0.142062	0.0655579	0.272435	-0.185413	-0.330545	0.0653999	-0.0724394	0.0567957	0.0598998	0.309923	-0.224057	0.101279	0.132974	-0.0543975	0.123795	-0.166308	4	4	4	12.6	12.6	12.6	29.537	0.00031348	3.6359	26344000	4
DHRS7	Dehydrogenase/reductase SDR family member 7	Q9Y394-2;Q9Y394	Q9Y394-2;Q9Y394		0.0188831	-0.0360851	0.0752536	-0.00351505	0.00103837	-0.0201875	-0.0313491	0.159795	0.0507997	0.0228407	-0.0348837	-0.396352	0.091834	-0.00347143	-0.1297	0.347442	-0.102048	-0.0463186	-0.181226	0.160882	3	3	3	13.5	13.5	13.5	32.267	0	5.5338	71114000	8
DHTKD1	Probable 2-oxoglutarate dehydrogenase E1 component DHKTD1, mitochondrial	Q96HY7	Q96HY7		-0.0396303	-0.0232436	0.0530765	0.170764	0.0738554	0.0884295	-0.0229075	-0.0189672	0.0773512	0.0863632	0.0742545	-0.0492732	0.0863353	-0.331681	0.119126	-0.0225309	0.0646365	-0.105131	-0.0865543	-0.250642	2	2	2	1.7	1.7	1.7	103.08	0.0026983	2.1534	41424000	4
DHX15	Pre-mRNA-splicing factor ATP-dependent RNA helicase DHX15	O43143	O43143		-0.0285276	0.0677474	-0.00145894	0.0573314	0.0155668	-0.0466871	0.0076229	-0.0677176	-0.0588077	0.00363388	-0.00724608	-0.0285953	0.00702772	0.0186579	-0.0144674	-0.00963116	-0.0394628	0.0381371	0.015719	0.0147884	26	26	26	33.8	33.8	33.8	90.932	0	71.92	1314000000	101
DHX16	Putative pre-mRNA-splicing factor ATP-dependent RNA helicase DHX16	O60231	O60231		-0.0768386	0.0819803	-0.0528809	-0.247306	-0.0809962	0.0609153	0.0563969	0.295854	0.0178107	-0.0398753	0.26806	-0.427896	-0.0879904	0.0784811	-0.0284176	-0.00362854	-0.0128836	0.0366821	0.0348976	0.0712661	13	13	13	13.6	13.6	13.6	119.26	0	38.136	304990000	28
DHX29	ATP-dependent RNA helicase DHX29	Q7Z478	Q7Z478		-0.121045	-0.0708584	-0.0434504	-0.00611295	0.00675421	-0.124017	0.0709581	0.118655	-0.0473634	0.0517194	-0.336994	0.132888	-0.00612507	0.18356	0.211082	0.113964	0.0706315	0.0340299	-0.013681	-0.280963	11	11	11	8.3	8.3	8.3	155.23	0	17.851	818310000	15
DHX30	Putative ATP-dependent RNA helicase DHX30	Q7L2E3-3;Q7L2E3;Q7L2E3-2	Q7L2E3-3;Q7L2E3;Q7L2E3-2		-0.00696912	-0.00477701	-0.00722323	-0.0366077	0.0305993	0.0489747	-0.0165196	0.0207802	0.0451682	0.00164328	-0.0331758	0.0628428	-0.0135958	-0.0533258	-0.0373883	-0.0701173	0.00667855	-0.0771109	-0.0155494	0.0993036	10	10	10	9.3	9.3	9.3	129.44	0	20.927	199920000	25
DHX38	Pre-mRNA-splicing factor ATP-dependent RNA helicase PRP16	Q92620;Q92620-2	Q92620		-0.0813628	0.0635229	-0.373729	0.31337	-0.0574433	-0.0430647	-0.366646	-0.228872	-0.0141879	-0.120514	0.269695	-0.157557	-0.0593611	0.184309	-0.185169	0.17803	0.104623	0.000763856	0.309725	0.207499	7	7	7	7	7	7	140.5	0	15.583	81607000	12
DHX40	Probable ATP-dependent RNA helicase DHX40	Q8IX18-3;Q8IX18;Q8IX18-4;Q8IX18-2	Q8IX18-3;Q8IX18;Q8IX18-4;Q8IX18-2		0.362283	-0.39928	0.838258	0.335815	-0.201097	0.206296	0.296914	-1.25072	0.410613	0.430933	1.40034	0.0734978	0.50115	-1.40285	0.112547	-1.52921	0.287766	-0.218528	-0.878097	0.566998	4	4	4	8.4	8.4	8.4	81.796	0	12.243	35492000	5
DHX57	Putative ATP-dependent RNA helicase DHX57	Q6P158;Q6P158-3;Q6P158-2	Q6P158		0.219126	-0.0318578	-0.0293242	0.37298	0.0717777	0.221976	0.318335	0.107581	0.116385	0.007201	0.217312	-0.100818	0.271818	-0.838109	-0.756313	0.254651	0.0631444	-0.124175	-0.620343	0.202285	3	3	3	3.4	3.4	3.4	155.6	0	8.6186	38099000	6
DHX9	ATP-dependent RNA helicase A	Q08211;Q08211-2	Q08211		-0.0647684	-0.0722408	-0.0781709	0.00827789	0.0316217	-0.0243608	0.00213805	-0.0524219	0.0079273	-0.0208691	-0.0280041	0.00398293	0.0709933	-0.0165482	0.0590186	0.026179	0.0406561	0.0248742	0.0351356	-0.00979	37	37	37	33.7	33.7	33.7	140.96	0	254.71	4304400000	244
DIABLO	Diablo homolog, mitochondrial	Q9NR28-2;Q9NR28;Q9NR28-3	Q9NR28-2;Q9NR28;Q9NR28-3		-0.0284718	0.0578707	-0.0596391	-0.122885	0.0379214	-0.058228	-0.0034171	0.0817257	-0.0227994	-0.0110408	0.00483954	0.0730805	-0.0133594	-0.00934345	-0.0774589	-0.0107959	0.00442007	0.0203163	0.072572	0.00832313	6	6	6	31.2	31.2	31.2	21.232	0	12.898	310470000	18
DIAPH1	Protein diaphanous homolog 1	O60610-2;O60610-3;O60610	O60610-2;O60610-3;O60610		0.0215925	-0.000266135	0.0216762	0.00689821	-0.0130303	-0.014025	-0.0510443	-0.0629883	-0.0106714	-0.0425691	-0.0103913	0.0123641	-0.0251772	0.106745	0.0109546	0.0478945	-0.0417853	-0.00352731	-0.0028614	-0.00615716	15	15	15	14.2	14.2	14.2	138.91	0	30.091	457990000	49
DICER1	Endoribonuclease Dicer	Q9UPY3-2;Q9UPY3	Q9UPY3-2;Q9UPY3		-0.0352509	-0.0905281	-0.374645	0.290271	0.213014	-0.00932965	0.026004	0.450457	0.0431421	0.146179	-0.15677	-0.162304	-0.187422	-0.0201375	0.0774448	-0.0578051	-0.0721423	-0.0102389	0.0126701	-0.138977	3	3	3	1.7	1.7	1.7	208.45	0	5.4508	33298000	5
DIDO1	Death-inducer obliterator 1	Q9BTC0;Q9BTC0-2;Q9BTC0-3;Q9BTC0-1	Q9BTC0		-0.0783207	0.0192494	-0.0833358	-0.0422543	-0.070668	0.00214505	-0.0105866	0.171224	-0.128659	0.118959	-0.186405	0.180392	-0.0106704	0.147968	0.0305859	-0.0532046	-0.0579334	0.0352152	-0.112825	0.0727545	14	14	14	6.5	6.5	6.5	243.87	0	30.167	220260000	20
DIS3	Exosome complex exonuclease RRP44	Q9Y2L1;Q9Y2L1-2	Q9Y2L1;Q9Y2L1-2		0.000886768	-0.0695367	0.0290943	-0.184492	-0.0819185	0.0277131	0.0666014	-0.00534219	0.0297782	-0.0102037	0.213452	0.0200273	0.0354808	0.0439027	-0.212262	-0.0546366	0.053246	-0.0520631	0.0753078	0.0185958	6	6	6	7.4	7.4	7.4	109	0	13.392	155250000	20
DKC1	H/ACA ribonucleoprotein complex subunit 4	O60832;O60832-2	O60832;O60832-2		-0.0495034	0.0964771	-0.0128193	0.252189	-0.056566	0.0708383	-0.00554657	-0.0601724	0.0137461	-0.0283387	0.0811707	-0.210348	-0.0992485	-0.0466848	-0.243799	-0.0108263	0.0121446	0.0644207	0.0787357	0.0977607	4	4	4	7.8	7.8	7.8	57.673	0	9.3659	73618000	8
DLAT	Dihydrolipoyllysine-residue acetyltransferase component of pyruvate dehydrogenase complex, mitochondrial	P10515	P10515		0.0575255	-0.0433202	0.0562788	0.0609548	0.0204298	-0.0173814	-0.0474047	-0.0583169	0.0176952	-0.0397991	0.0264619	-0.0263385	-0.00789423	-0.0420491	-0.0618857	-0.0290991	0.0223612	0.0097178	0.057272	-0.0115775	11	11	11	17.9	17.9	17.9	68.996	0	22.141	570290000	44
DLD	Dihydrolipoyl dehydrogenase, mitochondrial	P09622;P09622-2;P09622-3	P09622;P09622-2;P09622-3		0.075941	-0.0275015	0.0615494	0.0606435	0.00681715	0.00775561	-0.0218742	-0.126409	0.0158604	-0.0479053	0.0362558	-0.0453008	-0.0128609	-0.0504213	-0.0223839	0.0179481	0.00471833	0.00488182	-0.0196671	0.025583	12	12	12	27.7	27.7	27.7	54.177	0	68.69	1581900000	87
DLGAP5	Disks large-associated protein 5	Q15398-1;Q15398-3;Q15398	Q15398-1;Q15398-3;Q15398		-0.0107957	-0.0583863	-0.117424	0.0716171	-0.105104	0.128723	-0.108661	0.0956751	-0.0635349	0.0443704	-0.246532	0.190076	-0.134563	-0.0198866	0.0175891	-0.0270341	0.141816	0.0546474	0.140789	-0.0497509	4	4	4	5.5	5.5	5.5	85.667	0.00030581	3.3992	71541000	7
DLST	Dihydrolipoyllysine-residue succinyltransferase component of 2-oxoglutarate dehydrogenase complex, mitochondrial	P36957;P36957-2	P36957;P36957-2		0.022473	-0.0639884	0.00850391	0.0112716	0.0277491	-0.0331029	-0.11472	-0.00873691	0.0244194	0.00383988	0.00313348	-0.0788274	-0.0232305	-0.0110329	0.00695762	0.0149181	0.0284159	0.00174298	0.0897678	0.0340772	10	10	10	24.3	24.3	24.3	48.755	0	19.168	847020000	40
DMD	Dystrophin	P11532-4;P11532;P11532-10;P11532-9;P11532-8;P11532-7;P11532-5;P11532-6;P11532-3;P11532-2	P11532-4;P11532;P11532-10;P11532-9;P11532-8;P11532-7;P11532-5;P11532-6;P11532-3;P11532-2		0.1184	0.153449	0.08636	0.162539	-0.042343	0.179739	-0.00500584	0.121476	0.096278	-0.0538887	0.0348994	0.0711255	0.0635322	-0.383751	0.103052	-0.330987	-0.1294	-0.0247308	0.0345186	-0.311632	4	4	4	1.2	1.2	1.2	425.64	0	8.1813	120240000	9
DNAAF5	Dynein assembly factor 5, axonemal	Q86Y56;Q86Y56-2;Q86Y56-3	Q86Y56;Q86Y56-2		-0.0476016	-0.0193655	-0.0426553	0.055621	0.0194106	0.0504194	-0.0270255	-0.00184113	-0.0780638	0.0528163	0.0154337	0.0322954	-0.0129675	-0.0498651	-0.172631	0.106305	0.018008	0.0444948	0.0446464	-0.043803	11	11	11	17.4	17.4	17.4	93.52	0	36.436	256510000	30
DNAJA1	DnaJ homolog subfamily A member 1	P31689;P31689-2	P31689;P31689-2		-0.0555582	0.0717761	-0.0312046	-0.0106509	-0.0419327	-0.00168758	-0.0379309	0.0502141	-0.0793152	-0.00574989	-0.0326707	0.0111962	-0.0961709	0.22836	0.00545996	0.0125565	-0.0165456	-0.0258903	0.0328493	-0.0334738	12	12	12	37.5	37.5	37.5	44.868	0	45.018	1413500000	73
DNAJA2	DnaJ homolog subfamily A member 2	O60884	O60884		0.00218996	0.00424951	0.0317698	0.0585281	0.00139303	-0.0030396	0.0360328	-0.125055	0.00232053	-0.0359725	0.000188649	-0.0728334	-0.00653763	0.0380037	-0.015034	0.0445746	0.0150318	-0.0403534	0.0442138	-0.0360407	12	12	12	27.4	27.4	27.4	45.745	0	36.69	1257000000	53
DNAJB1	DnaJ homolog subfamily B member 1	P25685;P25685-2;Q9UDY4	P25685;P25685-2		0.0690125	-0.120859	0.0218541	0.0436495	0.0321438	0.0436614	-0.0233682	-0.0912281	0.100434	-0.00403633	-0.00134522	0.0489332	-0.0423562	-0.186859	0.0273392	-0.0283713	0.0908312	-0.00468745	-0.0295075	-0.00161052	11	11	11	32.6	32.6	32.6	38.044	0	26.946	434040000	40
DNAJB11	DnaJ homolog subfamily B member 11	Q9UBS4	Q9UBS4		0.04198	-0.0652867	0.0255588	-0.0336862	0.0345312	-0.0418447	-0.0694452	-0.0634326	0.0487654	-0.018549	0.117441	-0.0411025	-0.0420945	0.018626	-0.00471592	-0.00265484	0.0668295	-0.0656717	-0.0444529	0.0828351	10	10	10	34.6	34.6	34.6	40.513	0	37.238	562690000	37
DNAJB12	DnaJ homolog subfamily B member 12	Q9NXW2;Q9NXW2-2	Q9NXW2;Q9NXW2-2		-0.230618	0.0572752	-0.450298	-0.0139275	0.0137808	-0.228545	-0.768302	-0.235572	-0.0551579	0.137439	0.112329	0.379646	0.1315	0.217836	0.228507	0.559933	-0.0801788	0.013954	-0.465821	0.61985	3	3	3	11.2	11.2	11.2	41.859	0	11.11	49794000	4
DNAJB6	DnaJ homolog subfamily B member 6	O75190-3;O75190;O75190-2;O75190-4;Q8NHS0;P25686-2;P25686	O75190-3;O75190;O75190-2;O75190-4		0.154005	-0.130267	0.280418	0.475955	0.00306339	-0.046726	-0.362941	0.282555	0.0644977	-0.0863689	0.0902171	-0.305622	0.0605367	-0.0283343	-0.894443	0.48074	-0.098557	0.0854357	0.0371439	-0.117678	3	3	3	11.7	11.7	11.7	35.714	0	5.4395	18483000	6
DNAJC1	DnaJ homolog subfamily C member 1	Q96KC8	Q96KC8		-0.126108	0.204465	-0.0457624	-0.00480004	-0.00541449	-0.285466	-0.0350593	0.107158	0.0220882	-0.0825711	0.20256	-0.173676	0.121266	0.160253	-0.108977	-0.011023	-0.0357048	0.00447764	-0.00183668	0.0377619	4	4	4	6.9	6.9	6.9	63.882	0.00059542	3.111	48777000	6
DNAJC10	DnaJ homolog subfamily C member 10	Q8IXB1;Q8IXB1-2;Q8IXB1-3	Q8IXB1;Q8IXB1-2		0.0262018	-0.0677508	0.0289226	0.0940853	0.0120696	-0.0922013	0.0470738	-0.0585926	-0.0191054	-0.0622804	0.0312387	0.00543976	0.0771427	0.0716897	-0.0056743	-0.186371	0.0784961	-0.0469765	0.0534658	-0.0432434	7	7	7	10	10	10	91.079	0	15.468	115050000	12
DNAJC11	DnaJ homolog subfamily C member 11	Q9NVH1-3;Q9NVH1;Q9NVH1-2	Q9NVH1-3;Q9NVH1;Q9NVH1-2		0.0183745	-0.0302442	0.0850036	-0.0303394	-0.0169617	-0.0189605	-0.0125487	-0.207293	-0.0274963	0.0418118	-0.0797716	-0.112361	0.0203996	0.0586858	-0.0451142	0.132896	-0.114029	0.0457058	0.155809	0.080065	4	4	4	9.9	9.9	9.9	57.196	0	9.282	50912000	10
DNAJC19	Mitochondrial import inner membrane translocase subunit TIM14	Q96DA6-2;Q96DA6	Q96DA6-2;Q96DA6		-0.0896293	0.180967	0.0232532	-0.185083	-0.0376967	0.207748	0.00176504	0.215656	-0.0140898	0.143658	-0.225125	0.382241	-0.199592	-0.227035	0.0944942	-0.15576	-0.0317579	0.0447138	0.115881	-0.300976	2	2	2	16.5	16.5	16.5	10.079	0.00086755	2.7968	47967000	3
DNAJC2	DnaJ homolog subfamily C member 2;DnaJ homolog subfamily C member 2, N-terminally processed	Q99543-2;Q99543	Q99543-2;Q99543		-0.0983817	0.0463724	-0.0690209	-0.000374317	-0.0112622	0.0345209	-0.043428	-0.0602301	-0.0251815	0.0190803	0.134008	-0.0105735	-0.0135595	-0.0593359	0.0337906	-0.0158012	0.0549154	0.0301174	-0.0253708	0.0233459	9	9	9	17.1	17.1	17.1	65.913	0	23.782	269090000	19
DNAJC21	DnaJ homolog subfamily C member 21	Q5F1R6;Q5F1R6-3;Q5F1R6-2	Q5F1R6;Q5F1R6-3;Q5F1R6-2		-0.149978	0.198789	-0.160861	0.165687	-0.176487	-0.0151625	0.0689898	0.0923365	-0.215315	0.0557502	-0.244449	-0.00294057	-0.136008	0.472502	-0.153859	0.025813	0.042165	-0.0989689	0.0455327	0.130096	4	4	4	9.4	9.4	9.4	62.027	0	16.876	71396000	8
DNAJC3	DnaJ homolog subfamily C member 3	Q13217	Q13217		0.039648	-0.260429	-0.0337988	-0.0750546	-0.178896	0.0996355	0.00542012	-0.0230731	0.196509	-0.108552	0.130948	0.0399522	0.341348	-0.158427	-0.0475283	-0.0144737	0.097981	-0.0915327	0.0555113	-0.0715581	2	2	2	6.3	6.3	6.3	57.579	0	3.7129	26758000	4
DNAJC7	DnaJ homolog subfamily C member 7	Q99615;Q99615-2	Q99615;Q99615-2		0.0360569	-0.0191545	0.017323	0.0346304	0.0102833	-0.0216629	-0.00710058	-0.0783823	0.0200647	-0.0275286	0.027405	-0.0167933	-0.0298244	-0.0332575	-0.0501022	0.0101026	0.00374606	0.0385623	0.0402898	-0.0110273	21	21	21	41.7	41.7	41.7	56.44	0	123.21	2323500000	133
DNAJC8	DnaJ homolog subfamily C member 8	O75937	O75937		-0.167586	0.442328	-0.0669816	-0.0572254	-0.0572071	-0.0320625	0.0717322	0.250286	-0.265952	0.0727686	-0.157796	0.167621	0.017479	0.27965	0.0929892	-0.0742497	-0.232487	-0.0796445	-0.137366	-0.122664	11	11	11	41.5	41.5	41.5	29.841	0	70.726	2393200000	106
DNAJC9	DnaJ homolog subfamily C member 9	Q8WXX5	Q8WXX5		-0.103483	0.184414	-0.0618757	-0.0385135	-0.0114458	-0.0326917	0.0263964	0.123638	-0.149915	0.14834	-0.119403	-0.0183276	-0.0127732	0.00297576	0.0547811	-0.0471436	-0.0274568	-0.0206787	0.0235023	0.0232898	11	11	11	38.1	38.1	38.1	29.909	0	30.25	537500000	51
DNASE2	Deoxyribonuclease-2-alpha	O00115-2;O00115	O00115-2;O00115		0.0396805	0.0219533	0.0690833	-0.0501097	0.0288471	-0.0235162	0.00125226	-0.113346	0.0436544	-0.0639736	0.000204861	0.127154	0.0309567	0.0490556	0.141792	-0.0142766	-0.0477975	-0.101575	-0.126953	-0.0684561	3	3	3	10.8	10.8	10.8	33.615	0	7.276	88482000	7
DNM1L	Dynamin-1-like protein	O00429;O00429-3;O00429-2;O00429-6;O00429-4;O00429-5;O00429-8;O00429-7	O00429;O00429-3;O00429-2;O00429-6;O00429-4;O00429-5;O00429-8;O00429-7		-0.0392404	0.128233	-0.0251279	0.0123087	-0.00753421	-0.0336038	0.0533261	0.00418872	-0.0709263	0.0128452	-0.0478714	0.0395212	-0.0645028	0.0980739	-0.0202312	0.01141	-0.0323324	-0.0137267	-0.0417987	-0.0193806	23	23	22	36	36	34.6	81.876	0	63.223	1017100000	73
DNM2	Dynamin-2	P50570-3;P50570-2;P50570-5;P50570-4;P50570;Q9UQ16-5;Q9UQ16-2;Q9UQ16-3;Q9UQ16;Q9UQ16-4	P50570-3;P50570-2;P50570-5;P50570-4;P50570		-0.0366962	0.0220203	-0.0469821	-0.0359098	0.0154949	-0.0643848	-0.0323938	0.0120768	-0.0423429	-0.0195646	-0.0266767	0.0410931	0.00877161	0.118938	0.0365088	0.0403028	-0.0109779	-0.013973	0.00636587	-0.0280397	15	15	11	17.6	17.6	13.5	97.553	0	52.158	761000000	51
DNMT1	DNA (cytosine-5)-methyltransferase 1	P26358-2;P26358-3	P26358-2;P26358-3		-0.00564495	0.0521368	-0.0133016	-0.0243765	-0.0382393	-0.00501704	0.0473464	-0.0373154	-0.0828669	-0.0677961	0.00358868	0.0606335	-0.0510242	0.218944	-0.0290319	-0.00974169	-0.0772109	0.0340041	-0.0103	-0.0211565	29	29	1	20.5	20.5	0.5	184.82	0	74.158	850050000	59
DNPEP	Aspartyl aminopeptidase	Q9ULA0	Q9ULA0		-0.0142773	-0.133428	-0.244503	0.344448	-0.00785018	0.0937362	0.294936	-0.31461	0.00727475	0.0165462	0.291564	-0.483718	-0.155449	-0.00362331	-0.661355	0.283744	0.0342167	0.14014	0.215648	0.240192	3	3	3	6.9	6.9	6.9	52.428	0	5.6426	60767000	7
DNPH1	2-deoxynucleoside 5-phosphate N-hydrolase 1	O43598;O43598-2	O43598;O43598-2		0.00276318	0.125423	-0.0148322	-0.00364265	0.0276621	-0.0687829	0.0326693	0.0698442	-0.0263745	0.0443174	-0.118134	0.167764	0.0563897	0.212721	0.0274419	0.0380441	-0.233253	-0.163579	-0.127073	-0.105737	5	5	5	32.8	32.8	32.8	19.108	0	32.354	476620000	19
DOCK7	Dedicator of cytokinesis protein 7	Q96N67-4;Q96N67-3;Q96N67-5;Q96N67-2;Q96N67-6;Q96N67;Q96N67-7;Q96HP0	Q96N67-4;Q96N67-3;Q96N67-5;Q96N67-2;Q96N67-6;Q96N67;Q96N67-7		0.14581	0.147854	0.110754	-0.0240494	-0.110933	-0.0730185	0.0611279	-0.0234251	0.041381	0.0822381	0.0154924	-0.0337193	-0.127375	0.0179707	-0.178538	0.03257	-0.0771658	-0.069476	-0.00216703	0.00829965	4	4	4	1.9	1.9	1.9	238.27	0	8.4329	205470000	19
DPF2	Zinc finger protein ubi-d4	Q92785-2;Q92785	Q92785-2;Q92785		0.0986437	-0.00793737	-0.00981675	0.17317	0.227767	0.313365	-0.346023	0.334539	0.314524	0.179176	0.136539	-0.798353	0.401904	-1.85052	-0.180353	0.191907	0.41919	-0.118823	0.0860908	0.378647	3	3	2	16.4	16.4	12.1	23.598	0	4.8686	39321000	6
DPM1	Dolichol-phosphate mannosyltransferase subunit 1	O60762	O60762		-0.000733823	-0.0468643	0.0173284	0.135495	-0.123748	0.154075	-0.113873	0.117938	0.142974	-0.0189893	0.103322	-0.0693963	-0.078764	-0.00921148	-0.0673353	0.00583744	-0.0124978	-0.0289549	-0.0840382	-0.078933	9	9	9	31.2	31.2	31.2	29.634	0	13.14	152050000	24
DPM3	Dolichol-phosphate mannosyltransferase subunit 3	Q9P2X0;Q9P2X0-2	Q9P2X0;Q9P2X0-2		-0.128041	0.177155	-0.00107566	-0.0498379	-0.0755288	-0.0625721	0.0593654	0.114079	-0.0893756	0.0605018	-0.0445911	0.0552326	-0.0543858	0.204787	0.0239455	-0.0314351	-0.0094485	-0.045806	0.0124898	-0.171828	2	2	2	23.9	23.9	23.9	10.094	0	16.183	253410000	14
DPP3	Dipeptidyl peptidase 3	Q9NY33;Q9NY33-4;Q9NY33-2	Q9NY33;Q9NY33-4		0.0553834	-0.0304276	0.0889774	0.0563056	0.010622	0.00578504	-0.0569204	-0.0133025	0.0453154	-0.0312868	-0.0405557	-0.0640649	-0.0743617	0.0223743	0.0806438	-0.026218	-0.0254371	-0.000681259	-0.0400448	-0.0184754	18	18	18	29.3	29.3	29.3	82.588	0	50.934	876750000	53
DPP9	Dipeptidyl peptidase 9	Q86TI2;Q86TI2-4;Q86TI2-2	Q86TI2;Q86TI2-4;Q86TI2-2		0.0999672	-0.336433	0.0794386	0.59624	0.0996834	0.209091	0.341869	-1.41746	0.0527565	-0.00382996	0.770509	-0.239124	0.0298802	-0.0727865	-0.933497	-0.404533	0.077751	-0.178795	0.40699	0.765917	7	7	6	12.1	12.1	9.5	98.262	0	8.5385	57343000	12
DPY30	Protein dpy-30 homolog	Q9C005	Q9C005		0.0175983	0.543605	-0.0689677	0.00206681	-0.082747	0.151449	0.0637189	0.179728	-0.193046	-0.0989524	-0.118422	0.268507	0.103524	-0.0475124	0.0145909	-0.104706	-0.357646	-0.0589856	-0.235407	-0.0347637	3	3	3	27.3	27.3	27.3	11.25	0	8.8692	122820000	12
DPYSL2	Dihydropyrimidinase-related protein 2	Q16555-2;Q16555	Q16555-2;Q16555		-0.0357099	0.0522595	-0.0168304	-0.014426	-0.00354785	-0.0424844	0.00776967	-0.0588724	-0.0645653	0.0162651	-0.0188753	-0.0544342	-0.00610361	0.0691757	0.00302762	0.0329761	-0.0215654	0.0135617	0.052465	0.0335451	20	20	16	47.6	47.6	39.4	58.162	0	88.081	1296800000	91
DPYSL3	Dihydropyrimidinase-related protein 3	Q14195-2;Q14195;Q14117;O14531	Q14195-2;Q14195		0.0919491	-0.202993	0.062827	0.0588388	-0.0191403	0.0234299	-0.0581761	-0.150223	0.137508	0.0184807	0.0181929	-0.0322281	-0.044464	-0.115831	0.017715	2.54624e-05	0.0463202	0.0420262	0.0855773	-0.0362039	19	16	15	33.2	28.7	27.6	73.91	0	93.01	828130000	47
DPYSL5	Dihydropyrimidinase-related protein 5	Q9BPU6	Q9BPU6		0.017756	0.17572	0.0316433	0.100524	0.0217647	-0.0225392	0.0679268	-0.148289	0.120033	-0.101853	0.192642	0.0984267	-0.127154	-0.0379505	-0.120912	-0.155116	-0.0374068	-0.0310845	-0.00298996	-0.0975123	7	7	7	14.4	14.4	14.4	61.421	0	16.359	1099900000	33
DR1	Protein Dr1	Q01658	Q01658		-0.162328	0.331511	-0.0903287	-0.0376686	0.0114525	0.0975455	0.0729318	0.38019	-0.173958	0.102263	-0.120481	0.218897	-0.0806495	0.0809869	0.0975095	-0.115595	-0.20347	-0.0260663	-0.172444	-0.266665	5	5	5	27.8	27.8	27.8	19.443	0	18.718	486710000	30
DRAP1	Dr1-associated corepressor	Q14919;Q14919-2	Q14919;Q14919-2		-0.2282	0.574105	-0.182242	0.0606029	-0.0976109	-0.0106662	-0.0716204	-0.777001	-0.533174	0.13028	-0.071696	0.319491	0.0619437	0.353034	0.172787	0.224375	-0.00870338	-0.263723	0.138217	0.153432	3	3	3	9.8	9.8	9.8	22.35	0	5.138	77456000	7
DRG1	Developmentally-regulated GTP-binding protein 1	Q9Y295	Q9Y295		0.0493983	0.00680774	0.0905652	0.0359856	-0.0385664	-0.00729918	0.023705	-0.129059	0.0553758	-0.0602116	0.0187284	-0.044323	-0.0129144	-0.0202166	-0.10206	-0.0367906	0.0146708	-0.00975909	0.075838	0.0337553	14	14	13	42.2	42.2	40.3	40.542	0	73.087	534140000	48
DRG2	Developmentally-regulated GTP-binding protein 2	P55039	P55039		0.0694224	-0.220649	-0.0981458	0.154595	-0.0959883	0.0822115	-0.0741552	0.0423388	0.0955006	-0.112586	0.0805983	-0.0255879	-0.0441579	-0.00221902	-0.124644	-0.0761247	0.0413182	0.164433	0.0556947	0.0317757	5	4	4	14.3	12.4	12.4	40.746	0	8.1483	62625000	12
DSC2	Desmocollin-2	Q02487;Q02487-2	Q02487;Q02487-2		0.532304	-0.31666	-0.176239	0.157411	0.356509	0.385098	0.35104	-0.194646	-0.142518	-0.060623	0.0676617	0.11425	0.569383	-0.0266367	0.129068	-0.243471	0.106995	-1.42657	-0.198362	-0.0403669	2	2	2	2.2	2.2	2.2	99.961	0.0042216	1.983	19781000	2
DSCR3	Down syndrome critical region protein 3	O14972-2;O14972	O14972-2;O14972		0.0477293	-0.407443	0.0685993	-0.302072	0.322539	0.0550005	0.473846	-0.138074	0.386564	0.164443	-0.167718	-0.0800008	-0.475364	-0.93226	-0.52231	0.463896	0.518016	0.298061	0.143167	0.0270101	3	3	2	13.3	13.3	10.7	29.884	0	7.2058	15951000	4
DSG2	Desmoglein-2	Q14126	Q14126		-0.113141	0.0927865	-0.0114923	-0.0480331	-0.0382658	-0.161171	-0.0974965	0.349404	-0.110788	0.0795839	0.0833618	-0.301461	0.00653791	0.307567	0.128977	-0.236329	-0.00374636	-0.0820779	0.0400905	0.0593243	7	7	7	10.3	10.3	10.3	122.29	0	16.802	91972000	19
DSP	Desmoplakin	P15924;P15924-3;P15924-2	P15924;P15924-3;P15924-2		-0.0380209	-0.0699454	-0.00595675	0.0555	-0.0438322	0.422066	0.00771132	-0.0404838	-0.0398796	-0.0649395	0.0125633	-0.00423679	-0.0601762	-0.00731009	-0.011354	0.0271995	-0.0641538	-0.0565231	-0.0148313	-0.0597664	54	54	54	19.6	19.6	19.6	331.77	0	136.54	1842000000	152
DST	Dystonin	Q03001-8	Q03001-8		-0.0465277	-0.195122	0.0126082	0.164208	0.297634	0.363441	0.0417325	0.0852474	-0.0174235	-0.394287	-0.110758	-0.477532	-0.128976	0.00250691	-0.0412871	-0.213273	0.1963	-0.10026	0.374332	0.131068	6	5	1	1.6	1.4	0.4	591.03	0	12.783	294980000	9
DSTN	Destrin	P60981;P60981-2	P60981;P60981-2		-0.0385359	0.0305584	-0.0158565	0.0242666	0.00574731	-0.0680174	0.00864533	-0.0214624	0.0260745	-0.0217134	0.00917339	-0.00308821	0.0375906	0.0371091	0.022231	0.0171014	-0.0387861	0.00725856	-0.0813945	0.00672895	13	12	12	62.4	58.2	58.2	18.506	0	103.9	2690900000	100
DTD1	D-tyrosyl-tRNA(Tyr) deacylase 1	Q8TEA8	Q8TEA8		0.0160543	-0.117428	0.102408	0.0828988	-0.0302396	0.0584426	-0.0645536	-0.102381	0.0211526	0.0288896	0.0663541	-0.233478	-0.0422911	-0.0486816	-0.184701	-0.0197607	0.124631	-0.033244	0.138856	0.180703	4	4	4	22	22	22	23.423	0	17.192	194680000	15
DTYMK	Thymidylate kinase	P23919;P23919-2	P23919;P23919-2		0.0548005	-0.042815	0.0285769	-0.0610702	0.00381555	-0.0285655	-0.0288285	-0.03743	0.0455871	0.0103553	0.0244759	0.0164505	-0.029542	0.0157319	-0.0204366	-0.00359545	-0.0282076	-0.0238747	0.0337434	0.0144593	11	11	11	49.5	49.5	49.5	23.819	0	26.375	747680000	42
DUS3L	tRNA-dihydrouridine(47) synthase [NAD(P)(+)]-like	Q96G46-2;Q96G46	Q96G46-2;Q96G46		0.0334233	-0.133298	-0.0411575	0.0378306	0.0353834	0.126639	0.225002	-0.0337754	0.0334041	-0.0455975	0.0295457	0.041907	-0.0369012	0.140597	0.11438	-0.0890856	-0.0039821	-0.172382	-0.213457	-0.104845	3	3	3	9.5	9.5	9.5	52.772	0	16.864	45523000	5
DUSP3	Dual specificity protein phosphatase 3	P51452;P51452-2	P51452;P51452-2		0.159448	-0.131302	-0.0166152	-0.116534	-0.0561326	0.0313413	0.0555436	0.0401434	0.177188	-0.279516	0.0544409	-0.142733	-0.0339663	-0.19017	-0.0567672	0.0568328	0.239111	0.0612844	0.0157519	0.0762827	6	6	6	43.2	43.2	43.2	20.478	0	18.428	78302000	22
DUT	Deoxyuridine 5-triphosphate nucleotidohydrolase, mitochondrial	P33316-2;P33316	P33316-2;P33316		-0.125849	0.273707	-0.0721613	-0.044106	-0.000410266	0.0195654	0.00435486	0.254529	-0.170959	0.0599892	-0.12987	0.168734	0.047737	0.0571088	0.085288	-0.0368698	-0.1433	-0.0403037	-0.125696	-0.137857	9	9	9	64.6	64.6	64.6	17.748	0	51.554	1088400000	72
DVL2	Segment polarity protein dishevelled homolog DVL-2	O14641;Q92997-2;Q92997	O14641		-0.154421	0.0918147	0.0222764	-0.628782	0.138287	-0.0299097	-0.108182	-0.652634	0.175659	0.202478	0.286092	0.598775	0.0532842	-0.377681	0.10907	-0.545895	0.0407912	-0.163017	0.526337	0.359289	3	3	3	5.8	5.8	5.8	78.947	0	10.264	32899000	7
DYNC1H1	Cytoplasmic dynein 1 heavy chain 1	Q14204	Q14204		0.00277749	-0.0268258	0.0252904	0.0131922	-0.0139934	-0.00287357	-0.0130988	-0.00746858	0.0218557	-0.0109613	0.00373328	-0.0451075	-0.0150348	-0.00187212	0.00180101	-0.00653296	-0.00400731	0.0282206	-0.00333662	-0.00212723	136	136	136	30.4	30.4	30.4	532.4	0	323.31	7262000000	562
DYNC1I2	Cytoplasmic dynein 1 intermediate chain 2	Q13409-6;Q13409-3;Q13409-7;Q13409-2;Q13409-5;Q13409	Q13409-6;Q13409-3;Q13409-7;Q13409-2;Q13409-5;Q13409		0.0340915	-0.0370615	0.0455669	0.0540652	0.0273093	0.00836177	-0.0157724	-0.0448483	-0.00579405	-0.0334298	-0.0087384	0.0283526	0.00706863	0.02141	9.44138e-05	0.0573971	-0.0626038	0.0179334	-0.109828	-0.0399438	9	9	8	18.5	18.5	16.5	68.297	0	94.117	694950000	35
DYNC1LI1	Cytoplasmic dynein 1 light intermediate chain 1	Q9Y6G9	Q9Y6G9		-0.0170546	0.0369726	0.0519323	-0.0218085	-0.0284945	-0.0161654	-0.047842	-0.0740378	-0.0421945	-0.0331462	0.0928943	0.00388956	0.0407938	0.0863766	-0.0789341	0.046788	-0.0462126	-0.00358967	-0.0541063	0.0475698	14	14	13	31.5	31.5	29.1	56.578	0	51.724	652710000	49
DYNC1LI2	Cytoplasmic dynein 1 light intermediate chain 2	O43237;O43237-2	O43237;O43237-2		-0.119616	0.118489	-0.0214869	-0.0029912	0.045196	-0.00187068	0.128217	0.189983	-0.303908	0.0113094	-0.443067	0.150932	0.0412917	0.13972	0.0190792	0.0400593	-0.00549349	0.0521689	0.108035	-0.202416	11	10	10	23.8	21.1	21.1	54.099	0	45.703	371490000	18
DYNLL1	Dynein light chain 1, cytoplasmic	P63167;Q96FJ2	P63167		-0.0599173	0.136823	0.00348243	-0.00222807	0.0145268	-0.00485177	0.0822836	0.141653	-0.160507	-0.0403338	-0.0984294	0.146384	0.00270233	0.256783	-0.0313795	0.0220007	-0.150579	-0.0173615	-0.119234	-0.178188	6	6	6	65.2	65.2	65.2	10.366	0	12.915	1039800000	26
DYNLRB1;DYNLRB2	Dynein light chain roadblock-type 1;Dynein light chain roadblock-type 2	Q9NP97;Q8TF09;Q9NP97-2	Q9NP97;Q8TF09;Q9NP97-2		0.000170618	0.318636	-0.0444347	0.130253	0.035826	0.157617	0.09004	0.144898	-0.221514	0.0865199	-0.215029	0.238024	0.135749	-0.113514	-0.0692126	-0.0437626	-0.267321	-0.154884	-0.1364	-0.12803	3	3	3	21.9	21.9	21.9	10.921	0	19.052	324160000	19
DYNLT1	Dynein light chain Tctex-type 1	P63172	P63172		0.0548017	-0.874117	-0.236869	-0.224974	0.0928222	0.0745346	-0.142996	0.220421	0.303299	0.16574	0.20545	-0.330438	-0.0966814	0.0429175	0.173068	0.084181	0.128044	0.0859258	0.0495565	0.168946	2	2	2	30.1	30.1	30.1	12.452	0	18.239	74211000	7
EARS2	Probable glutamate--tRNA ligase, mitochondrial	Q5JPH6;Q5JPH6-2	Q5JPH6;Q5JPH6-2		-0.359472	-0.140378	0.168651	-0.237604	-0.129181	0.0119727	-0.424798	0.135375	-0.239682	0.160127	0.101375	-0.140362	0.0210393	0.579351	-0.313387	0.181565	0.0416541	0.0318545	0.304596	0.190933	3	3	3	6.3	6.3	6.3	58.688	0.00058772	2.9824	24283000	3
EBNA1BP2	Probable rRNA-processing protein EBP2	Q99848	Q99848		-0.0695414	0.195029	0.180463	0.0513891	-0.0475617	0.0113677	-0.0497825	0.0123234	0.0703225	0.107297	0.0285387	-0.172434	-0.206257	0.0830012	-0.233447	-0.015068	0.0776187	-0.243991	0.132073	0.0322893	3	3	3	13.1	13.1	13.1	34.852	0	4.153	49899000	8
ECD	Protein SGT1	O95905;O95905-3;O95905-2	O95905;O95905-3;O95905-2		0.0389646	0.0721206	-0.0260138	-0.012625	-0.05565	-0.036732	-0.0116524	0.099396	-0.0436523	0.0186234	-0.133412	0.119536	0.0117062	0.105287	0.0768215	0.00668659	-0.0787592	-0.0546233	-0.0473766	-0.105016	6	6	6	7.9	7.9	7.9	72.757	0	7.7023	154430000	12
ECE1	Endothelin-converting enzyme 1	P42892-3;P42892-2;P42892-4;P42892	P42892-3;P42892-2;P42892-4;P42892		-0.152268	0.159262	-0.489568	-0.269552	-0.162719	-0.262861	-0.0885646	0.271027	0.240553	0.0336476	0.279874	0.0992468	-0.0689985	-0.147815	-0.0858642	-0.0548295	0.110288	0.228196	0.219264	0.0853127	2	2	2	3.7	3.7	3.7	85.561	0	8.5133	58719000	5
ECH1	Delta(3,5)-Delta(2,4)-dienoyl-CoA isomerase, mitochondrial	Q13011	Q13011		0.0391722	0.00918835	0.0149858	0.0229158	0.0105776	0.0428481	-0.00231668	0.0250573	0.001297	-0.117654	-0.0483632	-0.00369617	-0.0306954	0.0404249	-0.0136019	0.0527788	-0.0246499	0.00677686	-0.00490932	-0.0765054	6	6	6	22.3	22.3	22.3	35.816	0	35.382	794810000	58
ECHDC1	Ethylmalonyl-CoA decarboxylase	Q9NTX5-3;Q9NTX5-6;Q9NTX5-2;Q9NTX5	Q9NTX5-3;Q9NTX5-6;Q9NTX5-2;Q9NTX5		0.126336	-0.290337	-0.0103213	-0.0968061	0.00207395	0.0408027	-0.0347783	0.0815306	0.228172	0.121801	0.171258	-0.00751516	-0.0778267	-0.333807	0.0745486	-0.212327	-0.01859	0.17866	-0.200712	0.201467	4	4	4	22.6	22.6	22.6	24.859	0	12.303	103360000	16
ECHS1	Enoyl-CoA hydratase, mitochondrial	P30084	P30084		-0.019515	0.00971287	-0.00929518	0.0554966	-0.00629482	0.0183062	0.0275891	-0.0205193	-0.043808	-0.0202066	-0.0133581	0.0189016	0.0124946	0.0132728	0.0168322	-0.014387	-0.0220254	0.0353489	0.00288077	-0.0977957	9	9	9	38.6	38.6	38.6	31.387	0	57.538	731340000	40
ECI1	Enoyl-CoA delta isomerase 1, mitochondrial	P42126-2;P42126	P42126-2;P42126		-0.107761	0.0780697	0.0456924	0.0256939	-0.0796473	0.0100869	-0.059064	-0.0969671	-0.0988413	0.00108738	-0.0734066	0.0999636	0.0109757	0.187988	-0.00734568	0.0747525	0.0158396	-0.0405126	0.0131648	-0.0561386	5	5	5	19.3	19.3	19.3	30.895	0	14.955	280340000	17
ECI2	Enoyl-CoA delta isomerase 2, mitochondrial	O75521-2;O75521	O75521-2;O75521		-0.00102153	-0.167747	0.463789	-0.0619438	0.00849552	-0.152936	0.0827123	-0.354164	0.0829198	0.0591989	0.302081	-0.53067	-0.0111854	0.0712703	-0.988502	0.2478	-0.0505996	0.13889	0.326437	0.478806	4	4	4	15.3	15.3	15.3	39.609	0	17.542	87467000	14
ECM29	Proteasome-associated protein ECM29 homolog	Q5VYK3	Q5VYK3		0.0457437	0.00712341	0.0160037	-0.00490646	0.0242749	-0.0576361	0.0167514	-0.0107271	0.0335968	-0.0351262	0.0107897	-0.0220827	-0.019245	-0.0216004	-0.0195668	-0.019312	-0.00462022	0.00477482	-0.00858355	0.00797904	37	37	37	22.7	22.7	22.7	204.29	0	79.322	849340000	98
EDC3	Enhancer of mRNA-decapping protein 3	Q96F86	Q96F86		-0.0220154	-0.00403219	0.0814976	0.00620317	0.0540281	-0.0336936	0.0415653	0.113173	-0.0125673	-0.0217113	-0.0798234	-0.110346	0.00313826	0.0919865	-0.0591011	0.108377	-0.0748855	-0.00296187	-0.0683529	-0.0668469	4	4	4	7.7	7.7	7.7	56.077	0	7.4334	128000000	10
EDC4	Enhancer of mRNA-decapping protein 4	Q6P2E9;Q6P2E9-2	Q6P2E9;Q6P2E9-2		-0.00878617	0.0028283	-0.0694047	-0.0246706	-0.028791	-0.00707488	-0.0257522	0.000314355	-0.0184536	0.00382786	0.0498434	0.00198498	-0.0473285	0.0932623	-0.0313058	0.0557849	-0.073995	0.0617962	-0.0315511	0.0411018	19	19	19	14.5	14.5	14.5	151.66	0	42.991	562630000	44
EDF1	Endothelial differentiation-related factor 1	O60869;O60869-2;O60869-3	O60869;O60869-2;O60869-3		-0.191903	0.257005	-0.163492	-0.150757	-0.0453022	-0.119504	0.0458678	0.356998	-0.272713	0.0952555	-0.230584	0.216698	0.0113652	0.489774	0.156568	-0.0797322	-0.195554	-0.0511381	-0.045593	-0.139629	12	12	11	68.2	68.2	67.6	16.368	0	58.599	3074700000	109
EDIL3	EGF-like repeat and discoidin I-like domain-containing protein 3	O43854-2;O43854	O43854-2;O43854		-0.0470911	-0.0595111	0.0346033	-0.293869	0.0963953	-0.184905	0.278583	-0.726214	0.029364	0.0273401	-0.00025475	0.926561	-0.127475	0.0798931	-0.615644	-0.336437	0.0944567	0.0688185	0.470903	0.228114	3	3	3	8.1	8.1	8.1	52.747	0.00087083	2.8535	23890000	4
EDRF1	Erythroid differentiation-related factor 1	Q3B7T1-5;Q3B7T1;Q3B7T1-3;Q3B7T1-4	Q3B7T1-5;Q3B7T1;Q3B7T1-3		-0.161663	-0.0847824	-0.0567415	0.13498	-0.18351	-0.0375872	-0.310228	0.336821	-0.055943	0.0289081	-0.0371905	0.216154	0.0156898	0.249107	-0.173175	-0.221826	0.178218	0.0288473	0.200141	-0.122588	3	3	3	2.6	2.6	2.6	134.88	0	4.1572	42855000	6
EEA1	Early endosome antigen 1	Q15075	Q15075		0.022597	0.178058	0.0944591	-0.0155061	0.0675573	0.122031	-0.0242209	0.0995954	-0.0839409	0.0394501	-0.0737006	0.127331	-0.0314187	-0.11584	-0.0932396	-0.0160948	-0.101446	-0.119763	-0.0407543	-0.091524	33	33	33	25.8	25.8	25.8	162.46	0	94.263	1039700000	90
EEF1A1;EEF1A1P5	Elongation factor 1-alpha 1;Putative elongation factor 1-alpha-like 3	P68104;Q5VTE0;P68104-2	P68104;Q5VTE0;P68104-2		0.0533389	-0.0207573	0.0551408	0.0140661	0.0116808	-0.106327	-0.00917885	-0.0901442	0.0417221	-0.0441975	0.0237207	-0.0280554	0.0216392	0.0177329	0.0323361	0.0415765	-0.00774053	0.0101937	-0.0248225	-0.0482942	28	28	15	55	55	29.7	50.14	0	275.91	98618000000	566
EEF1A2	Elongation factor 1-alpha 2	Q05639	Q05639		0.0626194	-0.0795231	0.0613372	0.0307844	0.0427166	0.0251967	-0.0447562	-0.107953	0.0582049	-0.0549316	0.0179753	-0.0446127	0.0135619	-0.0380327	-0.0292622	0.0510392	-0.0239784	-0.028548	0.0280019	0.00379109	16	3	3	31.5	5.6	5.6	50.47	0	21.366	437670000	17
EEF1B2	Elongation factor 1-beta	P24534	P24534		-0.187829	0.428411	-0.102897	-0.0316114	-0.0142447	0.00338311	0.0645493	0.349728	-0.323488	0.0816792	-0.238641	0.340433	-0.0129209	0.341972	0.0928292	-0.037289	-0.266647	-0.0730304	-0.167103	-0.303652	13	11	11	51.1	43.1	43.1	24.763	0	91.536	6326000000	197
EEF1D	Elongation factor 1-delta	P29692;P29692-2;P29692-4	P29692;P29692-2;P29692-4		-0.009819	0.10872	0.0197375	0.0374703	-0.0107361	0.0268178	0.000736505	0.116695	-0.0604887	0.0848501	-0.0607815	0.0981472	0.00665712	-0.0576262	-0.015133	-0.0223512	-0.0760921	-0.0349969	-0.0597165	-0.14846	14	14	2	55.2	55.2	12.1	31.121	0	212.76	3118300000	138
EEF1E1	Eukaryotic translation elongation factor 1 epsilon-1	O43324-2;O43324	O43324-2;O43324		0.0572421	-0.0562149	-0.00305396	0.0510109	0.0142756	-0.0364512	0.0333287	0.027965	-0.00259709	-0.0704589	0.0346846	-0.0615318	0.0149786	0.0440972	-0.0344922	-0.0316625	-0.001681	0.0140951	-0.0325459	-0.0173576	6	6	6	38.8	38.8	38.8	15.548	0	19.246	293510000	25
EEF1G	Elongation factor 1-gamma	P26641;P26641-2	P26641;P26641-2		0.0684275	-0.0480499	0.0542346	0.0128395	0.0165194	-0.0724775	0.00697049	-0.0658848	0.0470222	-0.0402325	0.0388058	-0.0469116	-0.0213491	0.00688356	-0.0183824	0.00992193	-0.00320336	0.023745	-0.00330782	-0.0219406	26	26	26	55.8	55.8	55.8	50.118	0	323.31	19894000000	369
EEF2	Elongation factor 2	P13639	P13639		0.0765421	-0.0651007	0.0794742	0.0294827	0.0233408	-0.0414384	-0.0065282	-0.0878235	0.0622151	-0.0383987	0.0383686	-0.0684517	-0.0080903	-0.0209133	-0.0202348	0.0235305	-0.00636116	-0.00450968	-0.0098485	-0.0116241	52	52	51	60.7	60.7	59.6	95.337	0	323.31	47813000000	896
EFHD2	EF-hand domain-containing protein D2	Q96C19	Q96C19		-0.0385102	0.0145376	-0.0562393	0.028468	0.0359826	0.0650182	0.0721186	0.057488	-0.044299	0.0441417	-0.106859	0.259255	-0.0154346	0.0602118	0.0183328	-0.123692	-0.134771	-0.00959191	-0.108744	-0.0737826	5	5	4	22.9	22.9	18.3	26.697	0	20.068	240440000	11
EFTUD1	Elongation factor Tu GTP-binding domain-containing protein 1	Q7Z2Z2;Q7Z2Z2-2	Q7Z2Z2;Q7Z2Z2-2		0.00285181	0.0330104	-0.0515987	0.0467577	0.000574775	0.0961435	-0.0688201	-0.0786566	0.0516856	-0.201528	0.10248	-0.0737005	-0.00747509	-0.100171	-0.0335765	0.0575263	0.139148	-0.0369545	-0.00329562	0.0692295	8	8	8	8.9	8.9	8.9	125.43	0	12.863	90082000	15
EFTUD2	116 kDa U5 small nuclear ribonucleoprotein component	Q15029-2;Q15029;Q15029-3	Q15029-2;Q15029;Q15029-3		0.00359192	-0.11874	0.0173088	-0.00398664	0.0230034	0.127919	-0.0355534	-0.10959	0.0277666	-0.0497797	0.0534394	-0.0209493	-0.00235472	-0.0225182	-0.0422247	0.0627922	-0.00728223	-0.00432066	0.0503006	-0.00519168	25	24	24	29.1	28.1	28.1	105.38	0	87.197	1581700000	134
EGLN1	Egl nine homolog 1	Q9GZT9;Q9GZT9-3;Q9GZT9-2	Q9GZT9;Q9GZT9-3;Q9GZT9-2		-0.0711586	0.016231	0.0444149	-0.108475	0.0010149	0.00293851	0.051535	0.0297395	-0.0731328	-0.0582966	0.153548	-0.0653621	-0.0608613	0.099603	-0.156009	-0.0624178	0.0131373	0.10781	0.0520018	0.0273694	4	4	4	13.1	13.1	13.1	46.02	0	10.286	101960000	8
EHD1;EHD3	EH domain-containing protein 1;EH domain-containing protein 3	Q9H4M9;Q9NZN3;Q9NZN3-2	Q9H4M9;Q9NZN3		-0.100449	-0.107708	-0.03025	0.0863416	0.110095	0.0728115	0.0147682	-0.0576703	0.0763434	-0.0322183	0.0646966	-0.0844287	-0.108812	0.0070948	-0.151278	0.032041	0.0323291	0.0277986	0.0722914	0.0198337	7	5	4	11.2	8.2	6.6	60.626	0	8.5799	147780000	11
EHD4	EH domain-containing protein 4	Q9H223;Q9NZN4-2	Q9H223		0.0603775	0.0146247	0.0772779	-0.0495435	-0.073538	0.0240515	-0.0852167	-0.0732284	0.0172666	-0.0145672	0.0856528	-0.0494945	-0.00955401	0.0580282	-0.12914	-0.022406	0.0462818	-0.145686	0.0896408	0.122803	8	8	5	14	14	9.8	61.174	0	16.561	138690000	19
EIF1;EIF1B	Eukaryotic translation initiation factor 1;Eukaryotic translation initiation factor 1b	P41567;O60739	P41567;O60739		0.172968	0.111919	0.0381082	-0.0362363	0.114591	0.0140873	-0.371912	0.303785	0.39235	-0.00376129	0.548949	-0.195958	0.0347783	-0.688358	-0.390033	-0.0788763	0.233892	-0.405182	-0.150603	0.299121	4	4	4	47.8	47.8	47.8	12.732	0	37.201	113850000	18
EIF1AD	Probable RNA-binding protein EIF1AD	Q8N9N8	Q8N9N8		-0.0192526	0.104912	-0.0780997	0.0615536	0.0255637	0.122846	0.199533	0.165219	-0.134719	0.0344314	-0.130771	0.101043	0.0348078	-0.0710071	0.12898	-0.187935	-0.0657313	-0.0545653	-0.152469	-0.140709	4	4	4	37	37	37	19.053	0	19.459	243150000	17
EIF1AX;EIF1AY	Eukaryotic translation initiation factor 1A, X-chromosomal;Eukaryotic translation initiation factor 1A, Y-chromosomal	P47813;O14602	P47813;O14602		-0.247232	0.505937	-0.0904111	-0.0998619	-0.0343565	0.0148341	0.115361	0.287215	-0.395188	0.108381	-0.276811	0.361795	0.0290763	0.409882	0.202042	-0.0998631	-0.354221	-0.0598266	-0.182856	-0.250265	7	7	7	43.8	43.8	43.8	16.46	0	64.615	3974400000	86
EIF2A	Eukaryotic translation initiation factor 2A;Eukaryotic translation initiation factor 2A, N-terminally processed	Q9BY44;Q9BY44-3;Q9BY44-4;Q9BY44-2	Q9BY44;Q9BY44-3;Q9BY44-4		-0.0690674	0.0677225	-0.0662886	0.00344992	-0.0115176	-0.0400181	0.0341648	-0.0712765	-0.0216374	0.0435451	-0.0763129	-0.0223247	-0.0604887	0.0917378	0.0954332	0.0476839	0.000741154	-0.0237317	0.0660656	-0.0442496	13	13	13	32.1	32.1	32.1	64.989	0	48.381	337820000	42
EIF2AK2	Interferon-induced, double-stranded RNA-activated protein kinase	P19525;P19525-2	P19525;P19525-2		-0.0171638	0.0657139	-0.00613672	-0.0863845	-0.0156557	-0.0743257	-0.0911921	0.140091	-0.0828425	-0.00768547	0.0220994	0.00369519	-0.0679761	0.179316	0.0386694	-0.0568953	-0.0257616	0.0236659	-0.00998154	0.0123804	9	9	9	19.1	19.1	19.1	62.094	0	28.4	211940000	22
EIF2B1	Translation initiation factor eIF-2B subunit alpha	Q14232;Q14232-2	Q14232;Q14232-2		0.00201264	-0.0592002	0.0116013	0.0234165	0.0154913	0.0279788	-0.0397721	-0.0881647	-0.00360739	-0.0108402	0.000733972	-0.0284239	0.0605382	-0.000199378	-0.0124087	0.0775249	-0.0520773	-0.00281099	-0.0234286	0.0452665	9	9	9	35.7	35.7	35.7	33.712	0	27.237	257540000	24
EIF2B2	Translation initiation factor eIF-2B subunit beta	P49770	P49770		0.0937702	-0.0124275	-0.181268	-0.130054	0.022408	-0.0411601	0.09472	-0.0132915	0.110909	0.0328464	0.0356377	0.138882	-0.0813984	-0.0689653	-0.152047	0.0340404	-0.104617	0.025921	-0.0175605	0.157286	4	4	4	11.4	11.4	11.4	38.989	0	5.408	63269000	7
EIF2B3	Translation initiation factor eIF-2B subunit gamma	Q9NR50-3;Q9NR50-2;Q9NR50	Q9NR50-3;Q9NR50-2;Q9NR50		0.0619664	-0.0644158	0.0966799	-0.042835	-0.0083314	-0.0110817	-0.0801237	0.0863437	0.00432634	-0.0517117	0.047924	-0.258947	-0.0202713	0.146729	-0.0506174	0.0756941	-0.0311497	-0.0487742	-0.00251331	0.0947397	7	7	7	18.2	18.2	18.2	44.803	0	17.077	151200000	13
EIF2B4	Translation initiation factor eIF-2B subunit delta	Q9UI10;Q9UI10-3;Q9UI10-2	Q9UI10;Q9UI10-3;Q9UI10-2		-0.0436897	0.0353362	-0.0133792	-0.251694	-0.0572592	-0.08631	0.00481787	0.0526549	0.0721798	0.111275	0.128514	0.100152	-0.0851693	0.0468956	-0.0833287	0.0257174	0.0204026	-0.0363759	0.127465	-0.124574	8	8	8	21.2	21.2	21.2	57.557	0	27.039	118880000	16
EIF2D	Eukaryotic translation initiation factor 2D	P41214;P41214-2	P41214;P41214-2		0.141332	-0.542204	0.0981175	0.0765875	-0.0965679	0.463149	-0.230031	-0.145167	0.181162	-0.313859	-0.0569873	-0.681054	-0.0489223	-0.157827	0.298655	0.271118	0.252895	0.0981282	0.00644598	0.328661	5	5	5	12.8	12.8	12.8	64.706	0	7.7798	26121000	11
EIF2S1	Eukaryotic translation initiation factor 2 subunit 1	P05198	P05198		0.0802614	-0.0925037	0.0639722	0.0472105	0.0167336	0.0234342	-0.0105117	-0.0860544	0.0656253	-0.042904	0.0476603	-0.0129164	-0.0202345	-0.114489	-0.0698497	0.0395341	0.015867	0.0454952	-0.039133	-0.0135667	15	15	15	47.6	47.6	47.6	36.112	0	119.19	1705600000	84
EIF2S2	Eukaryotic translation initiation factor 2 subunit 2	P20042	P20042		0.026617	-0.0746703	0.014013	-0.0550539	0.00871497	-0.0412194	-0.018389	-0.0201326	0.0737828	0.0338437	0.0240378	0.0494654	-0.0140568	-0.04386	-0.0157887	-0.0591683	0.00858071	-0.000447311	0.0077878	0.0395739	12	12	12	37.8	37.8	37.8	38.388	0	80.335	1160200000	76
EIF2S3;EIF2S3L	Eukaryotic translation initiation factor 2 subunit 3;Putative eukaryotic translation initiation factor 2 subunit 3-like protein	P41091;Q2VIR3;Q2VIR3-2	P41091;Q2VIR3;Q2VIR3-2		0.0544055	-0.0600558	0.0288239	0.00508519	0.00122518	-0.0430996	-0.00242415	-0.0373461	0.0335572	-0.0369586	0.00995618	-0.0262369	0.0173195	-0.00296038	-0.0366367	0.0174645	-0.0184422	0.0322946	-0.0138621	0.0215212	21	21	21	48.5	48.5	48.5	51.109	0	111.04	2699100000	105
EIF3A	Eukaryotic translation initiation factor 3 subunit A	Q14152;Q14152-2	Q14152;Q14152-2		-0.165721	0.137285	-0.0958091	-0.0868807	-0.042321	-0.0733936	0.0645474	0.244918	-0.165879	0.0341269	-0.13887	0.187097	-0.0183284	0.373535	0.107924	-0.0188315	-0.119134	0.0171164	-0.0434863	-0.254263	66	66	66	42.5	42.5	42.5	166.57	0	263.89	10592000000	369
EIF3B	Eukaryotic translation initiation factor 3 subunit B	P55884;P55884-2	P55884;P55884-2		0.0583795	-0.0839444	0.0167254	0.0451336	0.00325555	0.00994277	0.00553313	-0.0862821	0.0791781	-0.0284718	0.0624844	-0.0779854	-0.00862332	-0.0543167	-0.0690627	0.0146396	0.00383088	-0.00194516	-0.0105016	0.0656608	24	24	23	36.1	36.1	34.2	92.48	0	184.28	2037700000	138
EIF3C;EIF3CL	Eukaryotic translation initiation factor 3 subunit C;Eukaryotic translation initiation factor 3 subunit C-like protein	Q99613-2;Q99613;B5ME19	Q99613-2;Q99613;B5ME19		0.00435337	0.0203585	0.01344	0.0373125	-0.016219	-0.0196598	0.00591555	-0.0191892	-0.045666	-0.0253176	0.0148493	-0.0408064	-0.00565977	0.0478509	0.00115824	-0.00976591	-0.0143905	0.0316351	-0.0265872	-0.00998169	28	28	28	28.3	28.3	28.3	104.1	0	156.97	2887300000	119
EIF3D	Eukaryotic translation initiation factor 3 subunit D	O15371-2;O15371-3;O15371	O15371-2;O15371-3;O15371		0.0519454	-0.0283905	0.0269063	0.0354322	0.0202161	-0.024638	-0.0112168	-0.0707989	-0.0185244	-0.0459628	0.00550938	-0.0120461	-0.00754718	0.051226	0.0422143	0.00379572	-0.0382744	0.0172355	0.00163527	-0.0550863	16	16	16	42.5	42.5	42.5	58.14	0	85.098	920140000	53
EIF3E	Eukaryotic translation initiation factor 3 subunit E	P60228	P60228		0.0675842	-0.0168992	0.0280281	0.0976455	0.00328217	-0.0251373	0.0226656	-0.062123	0.0637553	-0.0299444	0.0176824	-0.0943107	-0.029919	-0.0411531	-0.0875071	0.0230164	-0.00670162	-0.00758146	0.00831223	0.0129358	17	17	17	40.4	40.4	40.4	52.22	0	101.53	1683900000	102
EIF3F	Eukaryotic translation initiation factor 3 subunit F	O00303	O00303	+	0.0272712	0.0146604	0.0234344	0.0773162	-0.00371427	-0.0235821	-0.0236313	-0.102587	0.0316895	-0.0184892	0.0755973	-0.0496204	0.00886765	-0.0131412	-0.0051142	0.0708214	-0.0423627	-0.00391392	-0.0673378	-0.0325333	9	9	9	30.3	30.3	30.3	37.563	0	41.247	1169900000	54
EIF3G	Eukaryotic translation initiation factor 3 subunit G	O75821	O75821		-0.0539439	0.130647	-0.068971	-0.0308172	0.00336275	0.0975725	-0.0299438	0.17156	-0.0199997	0.0624328	0.00317997	0.00486201	-0.04825	-0.079168	-0.0649611	-0.0880847	-0.0409113	-0.0744565	-0.00758257	0.0771039	11	11	11	30	30	30	35.611	0	50.758	1635000000	67
EIF3H	Eukaryotic translation initiation factor 3 subunit H	O15372	O15372	+	0.0778286	-0.0519192	0.10751	-0.0262068	0.0235324	-0.0333695	0.0236703	-0.120119	0.0604459	0.00010195	0.020809	-0.0481504	0.00683364	-0.121054	-0.073027	0.0257453	0.00813368	0.00675216	0.00995016	0.0461642	7	7	7	20.5	20.5	20.5	39.93	0	60.832	978890000	53
EIF3I	Eukaryotic translation initiation factor 3 subunit I	Q13347	Q13347		0.0603762	-0.0430511	0.0320113	0.0676846	0.0267424	-0.0241476	0.0123008	-0.0494766	0.0509777	-0.065509	0.0267811	-0.0686943	-0.0570188	0.0379997	-0.0163862	-0.0169248	-2.0355e-05	-0.00906367	-0.0123475	-0.00860327	16	16	16	68	68	68	36.501	0	120.36	2574000000	100
EIF3J	Eukaryotic translation initiation factor 3 subunit J	O75822;O75822-3;O75822-2	O75822;O75822-3;O75822-2		-0.128356	0.19202	-0.00545083	-0.0214305	0.0409518	0.240649	0.0170654	0.183337	-0.110609	0.183001	-0.0814933	0.114241	-0.0193737	-0.157875	0.00268269	-0.0590122	-0.118099	-0.145024	-0.11758	-0.0660143	14	14	12	50	50	39.9	29.062	0	26.658	802650000	77
EIF3K	Eukaryotic translation initiation factor 3 subunit K	Q9UBQ5-2;Q9UBQ5	Q9UBQ5-2;Q9UBQ5		0.0387374	-0.0191004	0.0169008	-0.0839644	-0.0222373	0.00646834	-0.0429823	-0.0338311	0.0322667	0.0335769	-0.0343022	0.0332682	-0.0252737	-0.10778	0.0372633	0.0204988	0.00965574	0.0309717	0.0121491	0.041345	6	6	6	39.3	39.3	39.3	24.484	0	66.173	620890000	42
EIF3L	Eukaryotic translation initiation factor 3 subunit L	Q9Y262;Q9Y262-2	Q9Y262;Q9Y262-2		0.0731707	-0.0288804	0.0406093	0.0495014	0.0137381	-0.0213132	-0.0286504	-0.0875105	0.0542049	-0.058881	0.06241	-0.0860105	-0.0199552	-0.0604548	-0.0244508	0.00741453	0.00234666	0.0233098	0.0073512	0.025681	21	21	21	40.2	40.2	40.2	66.726	0	100.68	2012700000	121
EIF3M	Eukaryotic translation initiation factor 3 subunit M	Q7L2H7;Q7L2H7-2	Q7L2H7;Q7L2H7-2		0.054715	-0.119102	0.0266287	-0.00923224	0.02547	-0.098666	0.0248253	-0.0677729	0.111988	-0.0231785	0.102054	-0.130847	0.00772409	-0.0743796	-0.0742838	0.0431995	0.0446763	0.0480383	0.000810243	0.0509641	12	12	12	30.5	30.5	30.5	42.502	0	55.695	499720000	49
EIF4A1	Eukaryotic initiation factor 4A-I	P60842;P60842-2	P60842;P60842-2		0.0763501	-0.0834776	0.0763652	0.0340221	0.0107052	-0.0707576	0.0150344	-0.117347	0.0584619	-0.0441793	0.00791591	-0.0765293	0.01275	-0.0351169	0.0129416	0.0267749	0.0021691	0.0503806	-0.0133428	0.000510454	22	22	9	42.9	42.9	17.7	46.153	0	182.96	13238000000	276
EIF4A3	Eukaryotic initiation factor 4A-III;Eukaryotic initiation factor 4A-III, N-terminally processed	P38919	P38919		0.0367281	-0.0260689	0.0422192	0.101505	0.00728463	-0.0773844	0.0129099	-0.0446694	0.0155898	-0.0421449	-0.00167495	-0.0691171	-0.000987433	0.0218617	-0.0765747	-0.0301086	0.0454557	-0.00304876	0.0426983	-0.0108428	21	16	16	33.6	27.5	27.5	46.871	0	80.038	1613300000	89
EIF4B	Eukaryotic translation initiation factor 4B	P23588;P23588-2;REV__P23588-2;REV__P23588	P23588;P23588-2		-0.339484	0.597688	-0.156369	-0.161292	-0.071837	-0.0646883	0.0805369	0.413556	-0.450804	0.0739792	-0.290279	0.454683	0.02107	0.62327	0.196362	-0.0933515	-0.383005	-0.0289039	-0.250412	-0.227089	28	28	28	42.2	42.2	42.2	69.15	0	323.31	8817300000	171
EIF4E	Eukaryotic translation initiation factor 4E	P06730;P06730-2;P06730-3;A6NMX2	P06730;P06730-2;P06730-3		0.0905921	-0.0733944	0.054779	0.0368071	0.00936899	0.0621406	0.0373172	-0.12052	0.0838544	-0.0903363	0.117821	-0.106051	-0.0347708	0.00822288	-0.285374	-0.00121718	0.0687135	-0.147105	0.0445331	0.18825	6	6	5	37.8	37.8	21.7	25.097	0	14.232	247720000	19
EIF4E2	Eukaryotic translation initiation factor 4E type 2	O60573-2;O60573	O60573-2;O60573		0.290467	-1.79017	-0.504162	-0.199068	0.19902	0.220576	0.231223	0.358193	0.589445	0.122712	-0.0171711	-0.573503	0.451417	-0.654615	0.192415	0.0892991	0.495119	0.053315	0.189879	0.199239	3	3	3	19.2	19.2	19.2	27.026	0	12.377	31175000	8
EIF4G1	Eukaryotic translation initiation factor 4 gamma 1	Q04637-3;Q04637;Q04637-9;Q04637-5;Q04637-4;Q04637-8;Q04637-6;Q04637-7;REV__Q8NEG2-2;REV__Q8NEG2	Q04637-3;Q04637;Q04637-9;Q04637-5;Q04637-4;Q04637-8;Q04637-6;Q04637-7		0.0133003	-0.0104112	0.00730485	0.0259817	-0.0111916	-0.0502197	-0.010258	-0.0586553	-0.00652564	-0.00202351	0.0144209	-0.0135763	-0.0217181	0.020852	-0.0566451	-0.0156703	0.0323696	0.0128531	0.0539742	0.0194685	46	46	43	32.8	32.8	31.1	171.51	0	323.31	5691800000	284
EIF4G2	Eukaryotic translation initiation factor 4 gamma 2	P78344-2;P78344	P78344-2;P78344		0.064783	0.0414653	0.0491643	0.0342737	0.00908499	0.00221858	-0.038938	-0.0510882	0.0340565	-0.00525503	0.0330097	-0.0771761	-2.25082e-05	-0.182451	-0.00538343	-0.0219371	0.0148998	-0.00149444	-0.0269538	0.0713739	17	17	17	22.6	22.6	22.6	98.149	0	59.577	694770000	75
EIF4G3	Eukaryotic translation initiation factor 4 gamma 3	O43432;O43432-3;O43432-4;O43432-2	O43432;O43432-3;O43432-4		0.0219862	0.0143526	0.0132216	0.0463362	-0.00507975	-0.0477108	-0.0250112	-0.0190796	-0.00968826	0.0337485	0.0646302	-0.0702415	-0.0728153	0.0423686	-0.085669	-0.0141185	-0.0146982	0.0148221	0.019789	0.0364879	23	20	20	17	15.3	15.3	176.65	0	58.362	490980000	43
EIF4H	Eukaryotic translation initiation factor 4H	Q15056;Q15056-2	Q15056;Q15056-2		-0.194312	0.23353	-0.10906	-0.100969	-0.0515959	0.0267924	0.040833	0.253866	-0.0622345	0.14335	-0.0834635	0.270637	0.0319518	0.193312	0.141094	-0.154549	-0.244489	-0.0990196	-0.175906	-0.116138	13	13	13	47.6	47.6	47.6	27.385	0	81.342	3669700000	116
EIF5	Eukaryotic translation initiation factor 5	P55010	P55010		0.0436606	0.0299054	0.027916	0.00566883	0.0358751	-0.00919833	0.0395842	0.041684	-0.0421406	-0.00636559	-0.13939	0.0618454	0.0277003	-0.0515948	0.0156934	0.0338115	0.00204185	-0.0525985	-0.0118861	-0.108582	14	14	14	37.1	37.1	37.1	49.222	0	48.345	602150000	49
EIF5A;EIF5AL1	Eukaryotic translation initiation factor 5A-1;Eukaryotic translation initiation factor 5A-1-like	P63241;P63241-2;Q6IS14;Q9GZV4	P63241;P63241-2;Q6IS14		0.019175	0.208057	-0.00611563	-0.0163866	0.0337952	0.120732	0.0330479	0.193408	-0.0979182	0.0910627	-0.127072	0.197544	-0.00324164	-0.119453	-0.0232497	-0.0357589	-0.124458	-0.150466	-0.134436	-0.114636	13	13	11	72.7	72.7	55.8	16.832	0	160.41	11610000000	258
EIF5B	Eukaryotic translation initiation factor 5B	O60841	O60841		-0.0884527	0.0784028	-0.0244484	-0.00497808	-0.0140028	-0.0422544	0.0314865	0.0549266	-0.121632	0.031855	-0.109259	0.110318	0.00975713	0.12955	0.0083538	-0.0528271	-0.0379274	0.0319897	0.0407623	-0.0879893	23	23	23	21.3	21.3	21.3	138.83	0	87.058	1173900000	76
EIF6	Eukaryotic translation initiation factor 6	P56537;P56537-2	P56537;P56537-2		0.100579	0.0434808	0.125716	0.0152632	-0.00707092	0.0706593	-0.0250411	-0.11564	0.0281184	-0.048583	-0.0103167	0.0354109	0.00674982	-0.151331	-0.0299014	-0.0447022	-0.00567928	-0.0596378	-0.067113	0.0826693	7	7	7	40.8	40.8	40.8	26.599	0	39.185	546140000	35
ELAC2	Zinc phosphodiesterase ELAC protein 2	Q9BQ52;Q9BQ52-4;Q9BQ52-3;Q9BQ52-2	Q9BQ52;Q9BQ52-4;Q9BQ52-3;Q9BQ52-2		-0.0496753	0.0950444	-0.0935531	0.123871	-0.0107536	-0.0134029	-0.00540113	-0.0215033	-0.00615823	-0.0356012	-0.0337628	0.0180082	0.00101385	-0.00993043	0.0357047	-0.0195272	0.00562027	0.00112882	0.0518569	-0.0893488	18	18	18	23.5	23.5	23.5	92.218	0	47.129	946850000	55
ELAVL1	ELAV-like protein 1	Q15717;Q15717-2;Q12926-2;Q12926;P26378-4;P26378-2;P26378-5;P26378;P26378-3	Q15717;Q15717-2		0.0153202	-0.129604	-0.0429111	0.00800191	-0.00614481	0.0223987	0.0484767	-0.0923422	0.0570786	-0.0277356	0.083564	-0.0650273	-0.00865383	-0.0182583	-0.0572223	0.0279057	0.0581188	0.0147661	0.0636939	-0.00779438	8	8	8	28.2	28.2	28.2	36.091	0	32.937	457830000	38
ELMOD2	ELMO domain-containing protein 2	Q8IZ81	Q8IZ81		-0.00547311	0.2116	0.242908	0.126332	0.0336002	-0.0801073	-0.033761	0.303168	0.0668154	-0.0481455	-0.116996	-0.320324	-0.0702291	-0.252119	-0.0787548	-0.156002	0.00554815	0.115796	-0.226591	0.226366	2	2	2	7.5	7.5	7.5	34.96	0.00058411	2.9207	49127000	6
ELP2	Elongator complex protein 2	Q6IA86-7;Q6IA86-2;Q6IA86-3;Q6IA86-5;Q6IA86;Q6IA86-6;Q6IA86-4	Q6IA86-7;Q6IA86-2;Q6IA86-3;Q6IA86-5;Q6IA86;Q6IA86-6;Q6IA86-4		0.155705	-0.0304863	-0.086016	-0.0134251	-0.337693	-0.0370793	-0.205168	0.138263	-0.0856723	0.0979184	-0.349226	0.00988215	-0.223059	0.142191	0.150167	-0.0619025	0.324092	-0.0286301	0.223785	0.159986	3	3	3	4.5	4.5	4.5	84.687	0	6.2925	55115000	7
EMC1	ER membrane protein complex subunit 1	Q8N766-4;Q8N766-3;Q8N766-2;Q8N766	Q8N766-4;Q8N766-3;Q8N766-2;Q8N766		0.0314147	-0.012199	0.0985595	0.0230495	-0.0894774	0.346498	0.0193711	-0.220222	0.0379674	-0.138971	-0.0363838	-0.0798143	-0.0224274	-0.0725333	0.0952155	0.0540952	-0.0479704	-0.0550158	-0.0358167	0.0482908	10	10	10	13.3	13.3	13.3	109.42	0	24.38	173360000	21
EMC10	ER membrane protein complex subunit 10	Q5UCC4-2;Q5UCC4	Q5UCC4-2;Q5UCC4		0.1955	-0.282462	0.289934	0.347839	0.194508	0.272443	-1.42126	-0.562817	-0.0315504	0.18347	0.715914	-0.481494	-0.312143	-0.465867	0.0180096	0.117094	0.115148	0.108239	0.38402	0.559103	2	2	2	10.6	10.6	10.6	26.806	0.00059684	3.1505	7759400	2
EMC2	ER membrane protein complex subunit 2	Q15006	Q15006		0.0121285	-0.0724255	-0.124144	-0.00278358	0.00853919	-0.027461	0.027382	-0.2106	-0.0100607	0.00129261	0.0128086	-0.0463575	-0.000786684	0.0958893	-0.0590757	0.0578164	-0.0424907	0.0126606	0.0620008	0.249298	2	2	2	7.4	7.4	7.4	34.833	0	4.8705	89790000	13
EMC3	ER membrane protein complex subunit 3	Q9P0I2;Q9P0I2-2	Q9P0I2;Q9P0I2-2		-0.0822833	-0.0702978	0.113553	-0.0898893	-0.0222987	0.0922681	-0.173185	0.309247	0.098789	0.0174985	0.0752266	-0.663902	0.102682	0.125796	0.0999085	-0.00231753	-0.163054	-0.121814	-0.0827403	0.380444	3	3	3	14.6	14.6	14.6	29.952	0	4.8182	38394000	7
EMC4	ER membrane protein complex subunit 4	Q5J8M3-3;Q5J8M3-2;Q5J8M3	Q5J8M3-3;Q5J8M3-2;Q5J8M3		0.0642497	-0.0376564	0.198936	0.00332145	-0.193432	0.130965	-0.572497	-0.0956197	-0.0405142	-0.194338	0.0497078	0.161092	-0.193196	-0.0319402	-0.374517	-0.189563	0.407226	0.0659216	0.499046	0.286438	4	4	4	37.5	37.5	37.5	15.088	0	14.892	90500000	16
EMC8	ER membrane protein complex subunit 8	O43402-2;O43402	O43402-2;O43402		0.0622138	0.0339389	0.206646	-0.212789	0.0696548	-0.023893	0.084423	0.00611365	0.00940406	-0.0820973	-0.0579628	-0.222653	0.109691	-0.0623222	0.340864	0.0610997	-0.123371	-0.015934	-0.118024	-0.121373	2	2	2	15.9	15.9	15.9	13.726	0	4.5883	50493000	5
EMD	Emerin	P50402	P50402		-0.0847336	0.158721	-0.0104442	0.0461975	-0.0238964	-0.0161983	-0.0178313	0.142843	-0.138348	0.0533821	-0.0675448	0.106553	0.0166234	0.263751	-0.0238895	-0.0244615	-0.172424	-0.0795913	-0.0429765	-0.142101	9	9	9	39.4	39.4	39.4	28.994	0	48.646	989930000	42
EMG1	Ribosomal RNA small subunit methyltransferase NEP1	Q92979	Q92979		0.0442132	-0.178105	0.0318092	-0.031857	-0.0401961	-0.105253	0.159381	0.00941861	0.119113	-0.0180715	0.0261022	-0.041833	0.105323	0.145931	-0.348454	-0.0412252	-0.0431466	-0.0525227	-0.0419304	0.244934	2	2	2	11.5	11.5	11.5	26.72	0	5.5836	31018000	5
EML1	Echinoderm microtubule-associated protein-like 1	O00423;O00423-3	O00423;O00423-3		-0.128099	-0.259416	-0.0014493	-0.186517	-0.171554	0.142259	-0.061836	-0.11249	0.0314586	0.048903	0.059267	0.119159	-0.11975	0.443384	0.124946	0.105896	-0.0324265	0.0225265	0.0476481	-0.128278	2	2	2	2.5	2.5	2.5	89.86	0	4.2418	32798000	5
EML4	Echinoderm microtubule-associated protein-like 4	Q9HC35;Q9HC35-2	Q9HC35;Q9HC35-2		-0.00661978	-0.00656003	-0.00510007	-0.0617902	0.0493393	0.0489359	0.0124714	0.0553407	0.0254608	0.00486126	-0.0258875	-0.0302365	0.0148478	-0.124801	-0.020548	-0.0262117	-0.0333116	0.00513329	-0.0224747	0.0907819	17	17	17	20.1	20.1	20.1	108.91	0	76.425	705150000	65
ENAH	Protein enabled homolog	Q8N8S7;Q8N8S7-3;Q8N8S7-2;Q9UI08-4;Q9UI08	Q8N8S7;Q8N8S7-3;Q8N8S7-2		-0.0320161	0.0503077	0.0286223	0.0172775	0.0185691	0.0319349	0.0593192	0.0566839	0.0205743	0.0469422	0.0162081	-0.0511711	-0.0450561	-0.0422017	-0.0718686	-0.0267081	0.0333579	-0.105127	-0.0692729	0.00725484	13	13	13	28.6	28.6	28.6	66.509	0	90.515	933810000	46
ENDOD1	Endonuclease domain-containing 1 protein	O94919	O94919		0.194415	-1.05098	0.0901426	0.206885	0.232307	0.578623	-0.0801626	0.0416719	0.606108	-0.162874	-0.13464	0.320424	0.22628	-1.01608	-0.185427	-0.146725	0.242457	0.127028	-0.0013134	-0.14451	7	7	7	19.4	19.4	19.4	55.016	0	12.163	137980000	12
ENO1	Alpha-enolase	P06733;P06733-2	P06733;P06733-2		0.0544339	-0.027078	0.052654	0.00429897	0.0202774	-0.0611568	0.00301522	-0.0843702	0.0366545	-0.0377104	0.043548	-0.0348967	0.00425577	-0.00225967	0.0042432	0.0252175	-0.017258	0.00712686	-0.00520696	-0.0421579	32	32	30	67.3	67.3	63.8	47.168	0	323.31	44895000000	739
ENO2;ENO3	Gamma-enolase;Beta-enolase	P09104-2;P09104;P13929-3;P13929-2;P13929	P09104-2;P09104;P13929-3;P13929-2;P13929		-0.0561353	-0.0729985	-0.117681	0.0134186	0.0309032	0.0864061	-0.112985	0.0085659	0.0675725	-0.0251868	0.0134077	-0.00159284	-0.0113836	-0.0320812	-0.0440608	0.0678311	0.0206113	-0.0304222	0.119385	0.0200565	6	4	4	18.9	10.5	10.5	42.707	0	19.615	194030000	16
ENSA	Alpha-endosulfine	O43768;O43768-3;O43768-2;O43768-9;O43768-4;O43768-5;O43768-7;O43768-6;O43768-8	O43768;O43768-3;O43768-2;O43768-9;O43768-4;O43768-5;O43768-7;O43768-6		-0.120808	0.728562	-0.0354077	0.0427498	-0.101639	0.098486	0.0170653	0.557005	-0.591352	0.227161	-0.499193	0.569714	-0.147592	0.532402	-0.0238763	-0.00561037	-0.433665	-0.214269	-0.299234	-0.356868	11	11	10	85.1	85.1	76	13.389	0	92.968	2131600000	87
ENY2	Transcription and mRNA export factor ENY2	Q9NPA8-2;Q9NPA8	Q9NPA8-2;Q9NPA8		-0.100816	0.203835	-0.173374	0.103834	0.0247589	0.035483	0.0394074	0.15907	-0.0634792	0.0773573	0.0262703	0.0436775	-0.0517838	0.0454748	-0.0764567	-0.267022	-0.161521	-0.0320241	0.0258561	0.0850813	3	3	3	28.1	28.1	28.1	10.984	0	5.5499	138010000	6
EP300;CREBBP	Histone acetyltransferase p300;CREB-binding protein	Q09472;Q92793-2;Q92793	Q09472;Q92793-2;Q92793		-0.0445706	-0.0650931	-0.063431	-0.0430194	0.108982	0.0621231	0.0456627	-0.0146289	0.0667431	0.0791617	-0.150134	0.316436	0.171634	-0.648245	0.0927738	-0.0135187	0.0632543	0.183296	-0.112792	-0.0910041	6	6	5	3.2	3.2	2.7	264.16	0	14.979	61221000	6
EPB41	Protein 4.1	P11171-5;P11171-2;P11171;P11171-6;P11171-4;P11171-3;P11171-7	P11171-5;P11171-2;P11171;P11171-6;P11171-4;P11171-3;P11171-7		-0.104328	0.0652491	-0.156171	0.07805	-0.0174166	-0.0959068	-0.07044	0.029748	-0.0645828	0.141379	-0.03442	0.0987203	-0.0248685	0.0702539	0.0172242	0.0221759	-0.0320867	0.0395928	0.0201928	-0.0387356	8	7	7	12.3	11	11	86.602	0	16.213	131510000	12
EPB41L2	Band 4.1-like protein 2	O43491;O43491-4;O43491-3;O43491-2;Q9H4G0-4;Q9H4G0-3;Q9H4G0-2;Q9H4G0	O43491;O43491-4;O43491-3;O43491-2		-0.0237833	0.0207482	-0.0101466	-0.000813857	-0.0143606	-0.0369607	0.0176797	0.0471937	0.021376	0.0252869	0.00394458	-0.00975895	-0.0506593	0.035942	-0.032669	-0.0069911	-0.00945947	0.00915571	-0.0203792	-0.0217142	33	33	28	37.5	37.5	33.2	112.59	0	153.21	3607300000	115
EPB41L3	Band 4.1-like protein 3;Band 4.1-like protein 3, N-terminally processed	Q9Y2J2-2;Q9Y2J2;Q9Y2J2-4;Q9Y2J2-3	Q9Y2J2-2;Q9Y2J2;Q9Y2J2-4;Q9Y2J2-3		-0.0772749	0.239161	-0.0835052	-0.0261578	-0.0381244	0.0915201	0.0688653	0.096081	-0.155098	-0.0221127	-0.17033	0.152183	-0.0137293	0.0855196	0.00937948	0.0133069	-0.0903349	-0.0422417	-0.0318137	-0.0616636	28	23	22	36.8	31.8	30.6	96.513	0	120.05	1326400000	94
EPCAM	Epithelial cell adhesion molecule	P16422	P16422		0.0173676	0.0951089	0.00386295	-0.111791	-0.066584	-0.0558513	0.0116049	0.0446618	-0.117257	0.00306797	-0.0850684	0.113208	0.163282	0.177658	-0.0580795	0.0359415	-0.0859472	-0.153559	0.0859766	-0.0739716	7	7	7	26.1	26.1	26.1	34.932	0	19.707	246230000	14
EPHA2	Ephrin type-A receptor 2	P29317	P29317		-0.149909	0.0846711	0.0578347	-0.163627	0.0242699	-0.0724947	-0.0160455	0.189511	-0.158246	-0.0250423	-0.141804	-0.0304731	-0.0471726	0.220962	0.05992	-0.0486184	0.0618973	0.0383486	0.120296	-0.0606483	5	4	4	4.8	4	4	108.27	0	4.7837	46874000	6
EPHA7	Ephrin type-A receptor 7	Q15375-2;Q15375-4;Q15375;Q15375-5;Q15375-3;Q5JZY3-2;Q9UF33-2;Q9UF33-3;P54762-5;Q06187;Q06187-2;Q5JZY3-3;P54756-3;P29320;P54762;P29323-2;P54760;P29323-3;P54753;P29322;Q5JZY3;P54756-2;Q9UF33;P54756;P29323	Q15375-2;Q15375-4;Q15375;Q15375-5		0.0911799	-0.151534	0.0747715	-0.0651916	0.0120644	0.0246863	-0.0461821	-0.0544755	0.142391	-0.0570347	0.0821117	0.0575343	-0.0707355	-0.0905022	-0.113293	0.0670666	0.032169	0.0446015	-0.00634956	-0.0296477	5	5	4	5.8	5.8	5	111.5	0	6.9965	104630000	9
EPHX1	Epoxide hydrolase 1	P07099	P07099		0.184562	-0.337971	-0.0429171	0.0468696	0.0195588	0.0942754	-0.0468166	-0.112368	0.177195	0.114444	0.0342245	-0.156928	-0.0718002	-0.50654	0.0311468	-0.029273	0.0883886	0.215172	-0.0160288	0.258436	6	6	6	19.8	19.8	19.8	52.948	0	21.071	122070000	25
EPN1	Epsin-1	Q9Y6I3-3;Q9Y6I3;Q9Y6I3-1;Q9H201-2;Q9H201	Q9Y6I3-3;Q9Y6I3;Q9Y6I3-1		-0.142625	0.0409791	-0.199824	-0.22518	-0.0591885	0.0191845	-0.0518434	0.243608	-0.0997047	0.105302	0.0303478	0.199153	0.0990729	0.0842577	0.0430411	0.00368032	-0.0473216	-0.0226707	-0.0499089	-0.0267279	5	5	5	18.7	18.7	18.7	57.504	0	23.825	140560000	20
EPPK1	Epiplakin	P58107;Q15149-7;Q15149-8;Q15149-9;Q15149-5;Q15149-4;Q15149-6;Q15149-3;Q15149-2	P58107		-0.00392213	-0.059558	-0.0295381	0.0273907	-0.0117114	0.101593	0.0368396	0.0130337	0.0337508	-0.0319985	0.0378292	-0.121884	-0.0183374	-0.038727	-0.0179685	-0.00582705	0.0261068	-0.0199105	-0.00691462	0.033384	33	33	29	26	26	20.1	555.65	0	108.24	2282900000	102
EPRS	Bifunctional glutamate/proline--tRNA ligase;Glutamate--tRNA ligase;Proline--tRNA ligase	P07814	P07814		0.0716089	-0.0731639	0.0233296	0.0451651	0.0217798	0.00834641	-0.0128909	-0.116411	0.0608028	-0.0606678	0.0552355	-0.0821958	-0.0267697	-0.0412465	-0.0247664	0.011955	0.0109625	0.00563284	0.0364697	0.0304541	41	41	40	32.5	32.5	32.5	170.59	0	208.72	3011800000	200
EPS15	Epidermal growth factor receptor substrate 15	P42566;P42566-2	P42566;P42566-2		0.271998	-0.714212	0.18486	0.0333984	0.00271863	0.766059	-0.334935	-0.257624	0.130263	-0.145945	0.133459	-0.23967	-0.385131	0.153462	0.117263	0.00219297	0.0549593	-0.156886	0.189998	0.137403	5	5	5	7.8	7.8	7.8	98.655	0	7.8933	48682000	5
EPS15L1	Epidermal growth factor receptor substrate 15-like 1	Q9UBC2-3;Q9UBC2;Q9UBC2-2;Q9UBC2-4	Q9UBC2-3;Q9UBC2;Q9UBC2-2;Q9UBC2-4		0.0265872	-0.117436	-0.0644453	-0.115592	0.00584135	0.122153	-0.0266808	0.0632066	0.00972629	0.103543	0.0886754	0.0279843	-0.065234	-0.239863	0.139728	-0.0695963	0.0747426	0.057225	-0.0848221	0.00788665	7	7	7	13	13	13	83.247	0	22.533	137140000	13
ERC1	ELKS/Rab6-interacting/CAST family member 1	Q8IUD2-4;Q8IUD2-2;Q8IUD2-3;Q8IUD2;Q8IUD2-5;REV__A0AVF1-2;REV__A0AVF1-3;REV__A0AVF1;O15083	Q8IUD2-4;Q8IUD2-2;Q8IUD2-3;Q8IUD2;Q8IUD2-5		-0.065538	-0.0305175	-0.0557871	-0.0237645	0.0405796	-0.00674167	0.032815	0.348483	-0.0747105	-0.0435446	-0.195197	0.135986	-0.0405255	0.169887	-0.0610308	-0.0479834	-0.0379524	0.0663495	0.000726126	-0.167902	5	5	5	5.4	5.4	5.4	108.79	0	11.56	162060000	13
ERGIC3	Endoplasmic reticulum-Golgi intermediate compartment protein 3	Q9Y282;Q9Y282-3;Q9Y282-2	Q9Y282;Q9Y282-3;Q9Y282-2		0.0328834	-0.0182224	0.197069	0.161526	-0.0800504	-0.107814	-0.0131176	-0.0403252	0.0745342	-0.0315499	0.00229353	-0.131495	0.0730383	0.059974	-0.118088	-0.011466	-0.00562826	-0.0198796	-0.0627197	-0.0173323	3	3	3	7	7	7	43.222	0	4.4333	86671000	7
ERH	Enhancer of rudimentary homolog	P84090	P84090		-0.108922	0.392048	-0.0763476	-0.0665838	-0.00596457	0.130256	0.0837705	0.191863	-0.193073	0.0874206	-0.200226	0.223677	0.0938833	-0.0138809	0.157747	0.0341878	-0.258681	-0.145801	-0.206133	-0.175609	6	6	6	49	49	49	12.259	0	91.207	1947700000	78
ERI3	ERI1 exoribonuclease 3	O43414-3;O43414-2;O43414	O43414-3;O43414-2;O43414		-0.00872341	0.00197929	0.158508	0.0528991	-0.0166681	-0.0655992	-0.159347	-0.10692	0.108393	-0.04608	0.0531209	-0.0955361	0.0840829	-0.122578	0.0425016	-0.0112883	-0.00299028	0.0454691	-0.016757	0.0491639	2	2	2	16.4	16.4	16.4	14.542	0	5.2122	66391000	5
ERLIN2	Erlin-2	O94905	O94905		0.0899179	0.0269589	0.0804361	0.109023	-0.00726881	-0.00490937	0.0363335	-0.147832	-0.0290129	-0.0662522	-0.0109395	-0.0965911	-0.059902	0.0806449	-0.0181847	0.0207111	-0.0439736	-0.00891709	0.027932	-0.0345431	6	6	3	19.8	19.8	10.6	37.839	0	11.073	232270000	14
ERMP1	Endoplasmic reticulum metallopeptidase 1	Q7Z2K6;Q7Z2K6-2	Q7Z2K6		-0.100974	-0.0207352	-0.225301	0.0893343	-0.213061	-0.0954939	0.00413102	0.140719	-0.0313569	0.0937373	0.14731	-0.159063	-0.00511322	0.265352	-0.0262896	-0.0843177	0.108725	-0.0237942	0.0109712	0.0688517	4	4	4	5.3	5.3	5.3	100.23	0	10.549	92983000	12
ERO1L	ERO1-like protein alpha	Q96HE7	Q96HE7		0.0942405	-0.0449744	-0.0457603	0.0400248	0.0800922	0.0519235	0.0331887	0.0157896	0.0295765	-0.0249814	0.0500065	-0.0872799	0.0312298	-0.215202	0.100346	-0.0646318	0.0156116	-0.0402314	-0.0710265	-0.0043121	13	13	12	34.2	34.2	31.8	54.392	0	52.802	463000000	48
ERP29	Endoplasmic reticulum resident protein 29	P30040;P30040-2	P30040		0.00844434	0.213743	0.0353841	0.00577831	0.0783776	0.0688505	0.0550374	0.127679	-0.0775476	0.0954192	-0.0462965	0.158725	0.0193834	-0.141332	-0.0133109	-0.0512488	-0.160538	-0.127516	-0.144833	-0.160569	9	9	9	36.4	36.4	36.4	28.993	0	53.697	1200100000	84
ERP44	Endoplasmic reticulum resident protein 44	Q9BS26	Q9BS26		0.0395617	0.0381699	0.028927	0.0722697	-0.00166721	-0.00347343	0.0156633	-0.0333472	0.0736889	-0.0286243	0.0469436	-0.0223735	-0.0210706	-0.0608864	-0.0790522	-0.00773239	-0.0104398	-0.0479732	-0.0489153	-0.00603795	15	15	15	37.7	37.7	37.7	46.971	0	59.277	1527900000	77
ESD	S-formylglutathione hydrolase	P10768	P10768		0.0796673	-0.0517464	0.0769352	-0.0348973	0.0381752	-0.0653041	0.0200514	-0.234447	0.0486643	-0.0134773	0.0355121	-0.0933133	0.0169627	-0.191588	0.0733385	0.0340197	0.0738238	0.0421078	0.000489995	0.0886563	10	10	10	45.4	45.4	45.4	31.462	0	58.705	512300000	45
ESPL1	Separin	Q14674	Q14674		0.330568	-0.0442711	-0.506359	0.0104103	0.00286116	0.413643	0.0246266	-0.293329	0.245025	0.265393	0.537875	-0.267621	0.00255609	-0.941918	-0.0096221	-0.388539	0.30737	-0.603942	0.462577	0.396325	2	2	2	1.2	1.2	1.2	233.17	0.0061146	1.7008	19563000	3
ESYT1	Extended synaptotagmin-1	Q9BSJ8;Q9BSJ8-2	Q9BSJ8;Q9BSJ8-2		0.00232223	-0.0818017	0.0149034	0.00312081	-0.0226732	-0.00488525	0.0530751	-0.00931072	0.00466347	-0.00108261	0.0109301	-0.0698654	0.000848293	0.038384	-0.0910121	0.0422088	0.0201479	0.0213624	-0.00138216	0.0136774	22	22	22	22.4	22.4	22.4	122.85	0	75.208	807980000	70
ESYT2	Extended synaptotagmin-2	A0FGR8-2;A0FGR8;A0FGR8-6;A0FGR8-4;A0FGR8-5	A0FGR8-2;A0FGR8;A0FGR8-6;A0FGR8-4		-0.311127	0.131809	-0.0857173	-0.0603333	-0.0827869	-0.100291	0.0388164	-0.0563596	-0.0829399	0.339294	0.0363384	0.140342	0.0667847	0.193482	0.00090456	-0.122871	-0.106961	-0.0699774	0.0827496	-0.00752503	4	4	4	5.3	5.3	5.3	98.9	0	25.591	116180000	10
ETF1	Eukaryotic peptide chain release factor subunit 1	P62495;P62495-2	P62495;P62495-2		0.0825957	-0.0782562	0.0454643	0.00745383	-0.00987416	0.0273097	-0.0308802	-0.0552993	0.0978858	-0.032576	0.0988116	-0.150544	-0.0440423	-0.134956	-0.0371891	-0.00148907	0.0260005	0.0431984	-0.00825004	0.098267	17	17	17	43.9	43.9	43.9	49.03	0	71.955	872060000	83
ETFA	Electron transfer flavoprotein subunit alpha, mitochondrial	P13804;P13804-2	P13804;P13804-2		-0.153772	0.310637	-0.138206	0.158869	-0.0694711	-0.18897	-0.0160272	0.0798264	-0.311553	0.0272233	-0.378342	0.160687	0.0274986	0.311664	0.148302	0.0628501	-0.0248952	0.0489244	0.0608031	-0.172418	13	13	13	50.5	50.5	50.5	35.079	0	75.505	2698700000	80
ETFB	Electron transfer flavoprotein subunit beta	P38117;P38117-2	P38117;P38117-2		0.0202934	0.100112	0.0284076	0.0330893	0.00538968	-0.0315346	-0.0295053	-0.0992592	0.000940442	-0.0867663	0.0718786	0.0309954	-0.00477066	-0.0399898	-0.0419368	-0.0371253	-0.0106194	0.0242311	-0.0149232	0.024724	12	12	12	46.7	46.7	46.7	27.843	0	83.22	1177900000	63
ETFDH	Electron transfer flavoprotein-ubiquinone oxidoreductase, mitochondrial	Q16134-3;Q16134	Q16134-3;Q16134		0.0434	-0.167753	0.173219	0.0887257	-0.137103	0.0842567	-0.200971	0.0627157	-0.0569514	-0.170239	-0.0730951	0.184023	-0.023414	0.365828	-0.0121898	-0.339582	0.0247352	0.0145256	0.115748	-0.0322485	2	2	2	3.5	3.5	3.5	62.824	0	3.8273	27213000	3
EWSR1	RNA-binding protein EWS	Q01844-6;Q01844-3;Q01844;Q01844-5;Q01844-2;Q01844-4	Q01844-6;Q01844-3;Q01844;Q01844-5;Q01844-2		-0.247856	0.305827	-0.175397	-0.122085	-0.0274788	0.016972	0.134635	0.229799	-0.292621	0.126152	-0.204076	0.253847	0.0341592	0.407023	0.133266	-0.0487923	-0.289418	-0.0554742	-0.149272	-0.0855796	6	6	6	13.2	13.2	13.2	62.507	0	68.869	2311200000	76
EXOC4	Exocyst complex component 4	Q96A65;Q96A65-2	Q96A65;Q96A65-2		0.0805981	-0.0112782	-0.172054	-0.0244919	-0.0822195	0.13639	0.0679095	0.106919	0.0184481	-0.0608797	-0.0902176	0.136849	-0.0531829	-0.0152437	-0.068266	-0.0596465	0.0143574	-0.0497043	0.0530526	0.0162905	12	12	12	15.2	15.2	15.2	110.5	0	40.072	227270000	26
EXOC5	Exocyst complex component 5	O00471	O00471		0.0103008	-0.0760108	-0.150931	0.00157367	-0.108851	0.282564	-0.00758648	-0.273284	-0.0210187	-0.110573	0.10642	-0.0699544	-0.067302	-0.0720627	0.00238568	0.0684164	0.0765332	0.0637057	0.13834	0.150965	9	9	9	13.8	13.8	13.8	81.852	0	14.297	202220000	16
EXOC6B	Exocyst complex component 6B	Q9Y2D4;Q9Y2D4-2	Q9Y2D4;Q9Y2D4-2		-0.381019	0.291395	-0.287041	-0.432516	0.261999	-0.0291216	-0.0800323	0.352481	-0.458152	-0.0272254	-0.582283	0.321248	-0.178807	0.392739	0.0182529	0.119942	0.0889415	0.016537	0.485413	0.0508809	2	2	2	2.7	2.7	2.7	94.2	0	11.368	37105000	3
EXOC7	Exocyst complex component 7	Q9UPT5-2;Q9UPT5-5;Q9UPT5-1;Q9UPT5-6;Q9UPT5;Q9UPT5-4	Q9UPT5-2;Q9UPT5-5;Q9UPT5-1;Q9UPT5-6;Q9UPT5		0.105469	0.120451	0.105331	0.0172026	0.0173226	-0.193226	-0.0897321	0.110888	0.0757987	-0.0328717	-0.0152084	0.145212	-0.0275734	-0.353123	-0.189389	-0.279471	0.153282	0.111756	0.0044961	0.157016	6	6	6	11.8	11.8	11.8	74.712	0	8.5999	41874000	9
EXOC8	Exocyst complex component 8	Q8IYI6	Q8IYI6		-0.107513	0.411749	-0.077941	0.248016	-0.0231232	0.10745	-0.00350007	0.448115	-0.172015	0.063735	-0.13357	0.120453	-0.0671208	-0.0460903	-0.13208	-0.144874	-0.094782	-0.0950039	-0.131233	-0.227042	6	6	6	9.4	9.4	9.4	81.798	0	17.284	121550000	11
EXOSC1	Exosome complex component CSL4	Q9Y3B2	Q9Y3B2		0.008073	-0.27608	0.0486741	0.00258313	0.196732	-0.0050549	0.131908	-0.37841	0.0689069	-0.0695945	0.102456	-0.24854	0.0582901	0.0274035	0.0777713	0.121617	0.0100162	-0.0414065	0.0494947	0.0587912	3	3	3	18.5	18.5	18.5	21.452	0	7.2611	53230000	4
EXOSC10	Exosome component 10	Q01780-2;Q01780	Q01780-2;Q01780		-0.028183	-0.0987418	0.0268885	-0.0569365	0.0210012	0.0462155	-0.136241	0.120991	-0.0513048	-0.00144977	-0.171978	-0.0106505	0.00309229	-0.0566019	0.0208733	0.0504956	0.0740782	0.0691796	0.151682	-0.0287797	4	4	4	5.6	5.6	5.6	98.088	0	4.7408	51974000	6
EXOSC4	Exosome complex component RRP41	Q9NPD3	Q9NPD3		-0.135683	-0.0882854	-0.474645	0.254769	0.295292	0.00530133	-0.104472	-0.331627	0.0562958	-0.106189	0.188006	-0.370387	-0.0392314	0.0348615	0.112191	0.0523622	0.093175	-0.138252	0.456845	0.183303	3	3	2	11.4	11.4	6.5	26.383	0.0044456	1.9214	33027000	7
EXOSC6	Exosome complex component MTR3	Q5RKV6	Q5RKV6		-0.00787571	-0.00464398	-0.0375465	0.0252512	-0.103237	-0.107092	-0.0553182	-0.241361	-0.0304453	-0.0128827	0.0720772	-0.115715	0.0151693	-0.00997704	-0.105692	0.249394	0.127412	0.110858	0.105888	0.0693667	6	6	6	29.4	29.4	29.4	28.235	0	21.539	156470000	12
EXOSC9	Exosome complex component RRP45	Q06265-3;Q06265-4;Q06265;Q06265-2	Q06265-3;Q06265-4;Q06265;Q06265-2		-0.0889709	0.0984887	-0.0218497	-0.0604115	0.112672	0.0108	0.0909041	-0.00178468	-0.0496118	-0.143174	-0.0862249	0.254309	-0.0269082	0.123133	-0.0920358	-0.0190061	-0.0213129	-0.0378301	-0.0585744	-0.038981	2	2	2	4.8	4.8	4.8	39.234	0.0046887	1.8784	45955000	5
EZR	Ezrin	P15311	P15311		0.0201756	-0.0550763	0.0232945	-0.0255144	-0.00564194	-0.11273	-0.00515547	-0.0386545	0.0487887	0.013553	0.0128248	0.0198885	0.0212422	0.0721342	0.0235021	0.0155362	-0.0301063	0.00494637	-0.0064559	-0.0529207	35	25	22	52	38.1	35.5	69.412	0	104.38	5573400000	173
F11R	Junctional adhesion molecule A	Q9Y624;Q9Y624-2	Q9Y624;Q9Y624-2		-0.0952347	-0.0329334	0.595938	0.45222	0.0139871	-0.208265	1.0745	-0.39783	-0.0328044	0.0255412	-1.00943	-0.974059	-0.0290932	0.184549	0.311881	-0.480707	0.0909174	0.0606214	-0.177764	0.571595	4	4	4	16.1	16.1	16.1	32.583	0	5.5073	37827000	6
FABP5	Fatty acid-binding protein, epidermal	Q01469;A8MUU1	Q01469		-0.0926116	0.18838	-0.10123	-0.0426194	0.00710879	-0.0919817	0.00106066	0.290296	-0.0757687	0.166973	-0.0883637	0.180556	0.0212023	0.080272	0.0313366	-0.0289011	-0.127679	-0.0986092	-0.139951	-0.135839	13	13	13	76.3	76.3	76.3	15.164	0	167.19	2496200000	93
FADS2	Fatty acid desaturase 2	O95864;O95864-3;O95864-4;O95864-2	O95864;O95864-3		-0.0469478	-0.0636746	-0.0559171	0.148564	0.102011	-0.167885	-0.035189	0.160624	0.119325	-0.093042	-0.20234	0.0918562	0.123514	0.255501	0.149436	-0.00681067	-0.0759694	-0.175547	-0.104531	-0.179348	3	3	3	8.6	8.6	8.6	52.259	0.00030912	3.5091	27747000	7
FAF1	FAS-associated factor 1	Q9UNN5-2;Q9UNN5	Q9UNN5-2;Q9UNN5		0.0823472	-0.167665	-0.125624	0.0903544	0.0723874	0.0446765	0.131011	-0.0278348	0.119658	0.0231439	-0.0651368	0.0648078	-0.0682919	-0.0596506	0.00308609	-0.0965202	-0.0152502	-0.0540701	0.0341127	-0.0419112	11	11	11	18.5	18.5	18.5	56.933	0	39.48	314180000	21
FAF2	FAS-associated factor 2	Q96CS3	Q96CS3		-0.054094	0.212591	-0.0378636	0.0225051	-0.0567849	0.0575664	-0.0435808	-0.027401	-0.215392	-0.0510549	-0.125205	0.176834	0.0046299	0.0860041	0.0969942	-0.0720301	-0.0396538	0.0334734	0.0516888	-0.0755961	4	4	4	9.9	9.9	9.9	52.623	0	7.2249	187530000	14
FAH	Fumarylacetoacetase	P16930-2;P16930	P16930-2;P16930		0.00841156	0.292805	-0.63904	0.43299	-0.112418	0.0057035	-0.36201	-0.179007	-0.0843791	-0.15808	0.35429	-0.503137	0.159532	0.0489728	0.451655	0.124876	-0.146694	-0.0365675	-0.0966454	0.382374	3	3	3	9.5	9.5	9.5	38.614	0	8.7557	29143000	6
FAHD1	Acylpyruvase FAHD1, mitochondrial	Q6P587;Q6P587-2;Q6P587-3	Q6P587;Q6P587-2;Q6P587-3		-0.103042	0.0732031	-0.235507	-0.136244	-0.0771248	-0.075761	0.00464839	-0.123426	-0.0986239	0.00273056	-0.339453	0.0357625	-0.023552	0.265312	-0.142223	-0.119345	0.0389719	-0.0248285	0.443676	0.578457	4	4	4	16.1	16.1	16.1	24.843	0	6.0059	201690000	13
FAM107B	Protein FAM107B	Q9H098;Q9H098-2	Q9H098;Q9H098-2		-0.0740353	0.163671	-0.25756	0.275299	-0.185473	0.437161	-0.0756624	0.290927	-0.341635	0.247	-0.263334	0.501907	0.0119007	0.805614	-0.264318	0.0458412	-0.508265	-0.578652	-0.440997	0.154241	3	3	3	22.9	22.9	22.9	15.558	0	7.1491	71725000	7
FAM114A2	Protein FAM114A2	Q9NRY5	Q9NRY5		0.0433924	-0.0612593	-0.0941598	0.0554985	-0.0428623	-0.195595	0.0629876	-0.214618	0.171184	0.0708761	0.171228	0.0445049	0.0544221	-0.226642	0.0988721	-0.00995341	0.0889719	0.0747979	-0.149835	0.00181943	3	3	3	6.7	6.7	6.7	55.468	0	8.3301	70437000	5
FAM120A	Constitutive coactivator of PPAR-gamma-like protein 1	Q9NZB2;Q9NZB2-6;Q9NZB2-4;Q9NZB2-2;Q9NZB2-5;Q5T035	Q9NZB2;Q9NZB2-6;Q9NZB2-4;Q9NZB2-2;Q9NZB2-5		-0.0360935	0.0361719	0.104462	-0.0245868	0.0275703	-0.0440019	-0.281031	-0.0763297	0.0444319	-0.0106201	0.0680051	-0.0546949	0.0381763	-0.0821869	0.112766	-0.0708403	-0.00727287	0.0111106	0.0982239	0.0903705	11	11	11	13.3	13.3	13.3	121.89	0	37.993	225330000	18
FAM120B	Constitutive coactivator of peroxisome proliferator-activated receptor gamma	Q96EK7-2;Q96EK7	Q96EK7-2;Q96EK7		-0.133853	-0.0169515	0.360663	0.0469121	-0.0394566	-0.0658771	0.772357	-0.384903	-0.0559384	-0.0764568	-0.0235686	-0.574925	-0.00755415	0.176014	-0.58933	-0.0138	0.0834179	0.113941	-0.0505121	0.423451	2	2	2	2.5	2.5	2.5	86.877	0.0025	2.3882	15999000	3
FAM129A	Protein Niban	Q9BZQ8	Q9BZQ8		-0.0933209	-0.19823	0.089199	-0.0863228	0.159535	0.195196	0.0606374	-0.1314	-0.0803281	0.026962	0.0283028	-0.18694	0.0405602	0.0881867	-0.0387263	0.222254	-0.0990605	-0.0622149	-0.127174	0.136516	6	6	6	8.5	8.5	8.5	103.13	0	10.853	537840000	9
FAM129B	Niban-like protein 1	Q96TA1-2;Q96TA1	Q96TA1-2;Q96TA1		-0.00135121	-0.0125658	-0.0600564	-0.0624643	0.0170865	-0.0691409	-0.167013	-0.186666	-0.0329713	-0.076685	-0.180933	0.0558985	0.0156332	0.128483	0.165369	0.261908	-0.0409138	0.0497104	0.163897	-0.0235941	7	7	7	11.1	11.1	11.1	82.682	0	8.8502	166150000	11
FAM134C	Protein FAM134C	Q86VR2;Q86VR2-2	Q86VR2;Q86VR2-2		-0.13693	0.660034	-0.0826961	0.118734	-0.0270677	-0.16691	-0.0438157	-0.0877317	-0.157075	-0.165245	0.0971695	0.0296978	-0.139649	0.257835	-0.103886	0.00685377	-0.149363	0.00165572	-0.0712964	0.103316	3	3	3	7.9	7.9	7.9	51.396	0	3.789	36122000	6
FAM136A	Protein FAM136A	Q96C01	Q96C01		-0.0652748	0.63566	0.0267464	0.0286109	-0.142425	0.197837	-0.0310234	0.359948	-0.313163	0.105145	-0.296419	0.328458	-0.076871	0.0136814	-0.000636876	-0.0770441	-0.329049	-0.0482545	-0.164326	-0.20797	6	6	6	40.6	40.6	40.6	15.641	0	16.718	864280000	36
FAM175B	BRISC complex subunit Abro1	Q15018	Q15018		0.00326195	-0.553588	-0.585423	0.238011	0.0116823	0.120768	-0.0430226	-0.446023	0.0900196	0.0214445	-0.218553	0.234917	-0.00564585	0.20729	-0.137329	0.57885	0.0362187	0.045834	0.330495	0.0144224	2	2	2	4.3	4.3	4.3	46.9	0.0026831	2.1041	38673000	2
FAM192A	Protein FAM192A	Q9GZU8	Q9GZU8		-0.152943	0.340603	-0.0832156	-0.0442493	0.0575043	0.0872084	0.0539895	0.204249	-0.209625	0.0949612	-0.201242	0.296645	0.036185	0.0812729	0.0812308	-0.069645	-0.254888	-0.102993	-0.0976968	-0.173721	12	12	12	48.4	48.4	48.4	28.912	0	31.231	553550000	34
FAM195B	Protein FAM195B	C9JLW8	C9JLW8		-0.313775	0.300134	-0.562368	0.270382	-0.0994717	0.218596	0.445386	0.9108	-0.0610676	0.286631	-0.193405	-0.22938	0.0262799	-0.0885853	-0.564584	-0.789224	-0.0553754	-0.236081	0.538918	0.13982	4	4	4	43.3	43.3	43.3	10.92	0	12.967	171030000	7
FAM207A	Protein FAM207A	Q9NSI2-2;Q9NSI2	Q9NSI2-2;Q9NSI2		-0.532341	0.325076	-0.189393	-0.0769337	-0.0910275	-0.0608131	0.011716	0.0908774	-0.357861	0.0780718	-0.389996	0.410375	0.0929755	0.48087	0.281214	-0.0472175	0.0744133	-0.0320793	0.0919318	-0.21623	2	2	2	15.3	15.3	15.3	23.944	0	3.7905	52285000	3
FAM213A	Redox-regulatory protein FAM213A	Q9BRX8-2;Q9BRX8	Q9BRX8-2;Q9BRX8		0.104975	0.0631685	0.125119	-0.122106	0.0512854	-0.0439914	-0.286124	0.201254	0.0226986	-0.0190334	-0.0010615	0.283814	-0.00446443	-0.0189583	0.0758465	-0.170199	-0.133293	-0.0451009	-0.126872	-0.013325	5	5	5	22.5	22.5	22.5	24.462	0	7.8658	78072000	10
FAM21A;FAM21C	WASH complex subunit FAM21A;WASH complex subunit FAM21C	Q641Q2-2;Q641Q2;Q9Y4E1-5;Q9Y4E1-3;Q9Y4E1-6;Q9Y4E1-2;Q9Y4E1-1;Q9Y4E1;Q5SRD0	Q641Q2-2;Q641Q2;Q9Y4E1-5;Q9Y4E1-3;Q9Y4E1-6;Q9Y4E1-2;Q9Y4E1-1;Q9Y4E1		0.184384	-0.79168	0.322657	0.0452148	0.0507626	0.603589	0.0381385	0.313631	0.565012	0.0599565	0.283684	-0.97251	0.186461	-0.637754	-0.496744	0.101659	-0.208066	-0.0353793	0.0147653	0.31585	4	4	4	5.7	5.7	5.7	144.94	0	17.475	30739000	12
FAM3C	Protein FAM3C	Q92520	Q92520		-0.00125566	-0.0383053	-0.0452617	-0.113667	-0.0318921	-0.0262558	0.0432355	0.237713	0.11956	0.0142203	0.0212349	-0.0165861	0.0267742	-0.0809042	-0.137199	0.0474343	0.0230541	-0.0277106	0.0283271	-0.0988863	4	4	4	14.5	14.5	14.5	24.68	0	5.2973	130010000	7
FAM49B	Protein FAM49B	Q9NUQ9;Q9NUQ9-2	Q9NUQ9		-0.0518106	-0.110417	0.0899283	-0.0713913	0.0739107	0.0551587	0.00551957	-0.181432	-0.0832752	-0.0222441	0.220091	-0.0120161	0.130317	-0.0621212	0.0977261	-0.196954	-0.0551631	0.102931	-0.010743	0.0256169	4	4	4	17.6	17.6	17.6	36.748	0	25.145	125900000	14
FAM50A	Protein FAM50A	Q14320;Q9Y247	Q14320		0.0679077	0.033307	-0.0224971	-0.0254524	0.111708	0.0440652	0.0596553	-0.0585892	-0.0353992	-0.0420588	-0.0508282	0.0806662	0.0522888	-0.164324	0.116509	-0.076685	-0.0348835	-0.0553261	-0.00567579	-0.0507578	7	7	7	20.6	20.6	20.6	40.241	0	27.397	259120000	17
FAM98B	Protein FAM98B	Q52LJ0;Q52LJ0-2	Q52LJ0;Q52LJ0-2		0.0483173	-0.00244707	-0.02231	-0.057551	0.0262039	-0.0029079	0.0289614	0.0208769	-0.0213763	-0.0395525	0.039813	-0.00859186	0.0169248	-0.067627	0.0611237	0.0184823	0.0282917	-0.00854162	-0.0127271	-0.101732	7	7	7	26.7	26.7	26.7	37.19	0	10.54	179320000	15
FANCD2	Fanconi anemia group D2 protein	Q9BXW9;Q9BXW9-1;Q9BXW9-3;Q9BXW9-4	Q9BXW9;Q9BXW9-1;Q9BXW9-3		-0.0453617	-0.02803	0.102333	-0.0211356	0.0338003	0.0331194	-0.0540422	-0.130145	0.0323627	-0.0240177	0.0189288	0.0522881	-0.0625817	-0.0995128	0.0646803	-0.0221201	0.00103518	0.136472	-0.0991592	0.0547172	13	13	13	9.9	9.9	9.9	164.13	0	59.021	3961000000	32
FANCI	Fanconi anemia group I protein	Q9NVI1;Q9NVI1-2;Q9NVI1-1;Q9NVI1-4	Q9NVI1;Q9NVI1-2;Q9NVI1-1		0.0119693	-0.0274587	0.0258413	0.0243632	0.00869475	-0.02892	0.0349585	-0.0760877	0.0514905	-0.0268426	0.00831443	-0.0687045	-0.015807	-0.0533015	0.00456446	0.0101522	0.0229953	0.0344656	0.0432844	-0.0403413	25	25	25	21.4	21.4	21.4	149.32	0	64.236	798880000	62
FARSA	Phenylalanine--tRNA ligase alpha subunit	Q9Y285;Q9Y285-2	Q9Y285;Q9Y285-2		0.0433165	-0.197538	0.0362536	-0.0247833	-0.0237255	-0.00529857	0.0860154	0.0505184	0.0559946	-0.0252539	-0.0255104	-0.0283335	0.031622	-0.0851458	0.0391543	-0.0625291	0.102943	0.0803715	-0.0360517	-0.0683887	8	8	8	20.3	20.3	20.3	57.563	0	43.347	352430000	28
FARSB	Phenylalanine--tRNA ligase beta subunit	Q9NSD9;Q9NSD9-2	Q9NSD9;Q9NSD9-2		0.0109659	-0.0572985	-0.000219449	-0.0199318	-0.0229312	0.0300416	0.0167026	-0.056868	0.0387568	-0.0102307	-0.0464844	0.0261883	-0.0484343	-0.0161733	0.0742602	0.00588484	0.0292589	0.0233303	0.00388174	-0.0370689	22	22	22	37.5	37.5	37.5	66.115	0	73.936	1376400000	88
FASN	Fatty acid synthase;[Acyl-carrier-protein] S-acetyltransferase;[Acyl-carrier-protein] S-malonyltransferase;3-oxoacyl-[acyl-carrier-protein] synthase;3-oxoacyl-[acyl-carrier-protein] reductase;3-hydroxyacyl-[acyl-carrier-protein] dehydratase;Enoyl-[acyl-carrier-protein] reductase;Oleoyl-[acyl-carrier-protein] hydrolase	P49327	P49327		0.0476389	-0.0282195	0.0288445	0.0579012	0.0109514	-0.0393167	0.00448769	-0.0725656	0.0196342	-0.0165627	-0.00303704	-0.0310114	-0.00383425	-0.0368618	-0.014487	0.0258965	0.00436082	0.0194951	-0.0155982	-0.0140855	96	96	96	48.9	48.9	48.9	273.42	0	323.31	19935000000	874
FASTKD2	FAST kinase domain-containing protein 2	Q9NYY8-2;Q9NYY8	Q9NYY8-2;Q9NYY8		-0.303053	0.574899	-0.391573	-0.0817059	0.184293	0.200539	-0.309066	0.302519	-0.101828	-0.200762	0.205296	0.421388	-0.0497927	-0.220167	0.00065583	-0.139961	-0.0704167	-0.0364254	-0.247238	0.20603	3	3	3	6	6	6	74.535	0	8.0502	42846000	5
FASTKD5	FAST kinase domain-containing protein 5	Q7L8L6	Q7L8L6		0.0194393	0.608147	0.0536087	0.263095	-0.0205575	-0.160158	-0.229107	0.264938	-0.00103235	-0.166134	0.150613	-0.466005	-0.0273657	0.100999	-0.297592	0.035607	-0.165674	-0.210378	0.12397	0.0672172	2	2	2	2.2	2.2	2.2	86.573	0.00030479	3.3696	40282000	5
FAU	40S ribosomal protein S30	P62861	P62861		-0.192736	0.415107	-0.124391	-0.0950535	-0.092532	-0.0953224	0.0186501	0.246861	-0.23948	0.0360094	-0.0823061	-0.0178474	-0.00277682	0.506297	0.0517594	-0.0292026	-0.280239	-0.0770427	-0.0924363	0.0903107	4	4	4	33.9	33.9	33.9	6.6478	0	13.477	1080200000	38
FBL	rRNA 2-O-methyltransferase fibrillarin	P22087	P22087		0.0491864	-0.0893999	0.0297328	0.00292797	0.0448228	0.00765052	0.00729284	-0.068516	0.0349262	-0.07585	-0.00902194	-0.0603928	-0.0206984	-0.00455636	0.0230224	0.0434541	0.0363363	-0.00513195	-0.0192332	0.017079	7	7	6	20.9	20.9	17.4	33.784	0	23.066	691560000	30
FCHO2	F-BAR domain only protein 2	Q0JRZ9-3;Q0JRZ9;Q0JRZ9-2	Q0JRZ9-3;Q0JRZ9;Q0JRZ9-2		-0.0642048	0.0563707	-0.199647	-0.202571	0.0178201	-0.206687	0.211309	-0.128328	0.0837481	-0.0269155	0.199499	0.0297773	0.111618	-0.0386764	-0.156625	0.175803	0.0504827	-0.00627007	0.0667884	-0.0296614	3	3	3	4.8	4.8	4.8	85.145	0.00030553	3.3888	34156000	5
FDFT1	Squalene synthase	P37268;P37268-4;P37268-3;P37268-2;P37268-5	P37268;P37268-4;P37268-3;P37268-2;P37268-5		0.0465859	0.000758708	0.0717733	0.0092124	0.034035	-0.0301634	0.034786	0.00830221	0.0554103	-0.000401784	0.0349202	0.0324452	0.0387062	0.00964397	0.0164369	-0.019812	-0.0951037	-0.0821858	-0.119354	-0.102365	7	7	7	17.3	17.3	17.3	48.115	0	25.345	334100000	24
FDPS	Farnesyl pyrophosphate synthase	P14324-2;P14324	P14324-2;P14324		-0.0485241	0.0212845	-0.0738234	0.0328614	-0.11214	-0.0928142	0.00927219	0.00230056	-0.0979159	0.0748068	-0.0665309	-0.00393096	0.0660775	0.0827258	-0.00187761	0.0294737	0.00887915	0.0749053	0.0512514	-0.0126513	7	7	7	23.5	23.5	23.5	40.532	0	42.005	922890000	57
FDX1	Adrenodoxin, mitochondrial	P10109	P10109		-0.200436	0.348013	-0.14734	-0.134732	-0.047915	-0.0778431	0.0824934	0.410176	-0.144782	0.112586	-0.225148	0.286045	-0.0604958	0.235222	0.00889605	-0.194581	-0.130093	-0.0569705	-0.0372162	-0.0822486	5	5	5	25.5	25.5	25.5	19.393	0	12.909	379220000	15
FDXR	NADPH:adrenodoxin oxidoreductase, mitochondrial	P22570-5;P22570;P22570-2;P22570-7;P22570-4;P22570-3;P22570-6	P22570-5;P22570;P22570-2;P22570-7;P22570-4;P22570-3;P22570-6		0.0741458	-0.056074	0.107715	0.180667	0.0464553	-0.0632019	-0.107973	0.0928341	0.0376525	-0.0496661	0.00871527	-0.00234661	-0.0147219	-0.230958	-0.243604	-0.0553582	0.0103342	0.22332	-0.016504	0.00220054	5	5	5	10.4	10.4	10.4	52.918	0	11.912	115780000	13
FECH	Ferrochelatase, mitochondrial	P22830;P22830-2	P22830;P22830-2		-2.5332e-06	0.0761995	0.017983	-0.0449021	-0.0305179	0.0797203	-0.129434	0.123656	-0.0494916	-0.0316419	-0.0595395	0.128818	-0.0409233	0.00196725	0.0125334	0.00963726	-0.0855389	0.0575145	-0.0997372	0.00733101	8	8	8	18.9	18.9	18.9	47.862	0	15.9	159410000	15
FEN1	Flap endonuclease 1	P39748;P39748-2	P39748;P39748-2		-0.0190407	-0.0256137	0.00317574	0.000524625	-0.00978965	-0.0246002	0.0220318	0.0536763	-0.0886523	-0.00506382	-0.0672477	0.0334058	-0.0221549	0.14941	-0.0102553	0.0223339	-0.0120277	0.0348181	0.0028347	-0.0941348	12	12	11	30.3	30.3	30.3	42.592	0	70.495	1632100000	87
FERMT2	Fermitin family homolog 2	Q96AC1-2;Q96AC1;Q96AC1-3;Q9BQL6-4;Q9BQL6-2;Q9BQL6	Q96AC1-2;Q96AC1;Q96AC1-3		-0.00626311	0.0127357	0.047422	-0.000832841	0.0079565	-0.0227365	0.0042406	-0.0672414	-0.0232166	-0.0497728	-0.0356414	-0.0476045	0.0213386	0.0880205	-0.0122507	0.0839704	-0.0616491	0.0108725	0.0319471	-0.0376643	6	6	6	10	10	10	72.397	0	14.183	219620000	20
FH	Fumarate hydratase, mitochondrial	P07954-2;P07954	P07954-2;P07954		0.0501892	-0.179789	-0.0457398	-0.0242991	-0.00187816	-0.0388073	-0.0668884	-0.0101355	0.0571206	0.0417776	0.013281	-0.0729934	-0.0255731	0.0158775	-0.0279093	0.114133	0.0174731	0.0408948	0.0515345	0.0353621	11	11	11	31.3	31.3	31.3	50.212	0	27.69	450290000	41
FHL1	Four and a half LIM domains protein 1	Q13642-1;Q13642-5;Q13642-4	Q13642-1;Q13642-5;Q13642-4		-0.0789501	0.240249	-0.0250794	-0.0294128	0.0154583	-0.0285079	0.0654738	0.195263	-0.181216	0.068051	-0.175329	0.12424	0.0171063	0.160995	0.0753192	-0.0453214	-0.163036	-0.0728647	-0.155511	-0.0632965	19	19	5	69.6	69.6	18.6	31.895	0	175.03	4677400000	142
FHL2	Four and a half LIM domains protein 2	Q14192	Q14192		-0.0608196	0.209684	-0.0792578	-0.205154	-0.0502888	-0.0100151	0.0938665	0.187544	-0.118608	0.0828703	-0.0589944	-0.0623648	-0.0361953	0.123957	0.0373609	-0.031209	-0.127966	-0.0353336	0.0375725	0.0469816	5	5	5	19.4	19.4	19.4	32.193	0	9.7992	107650000	10
FIS1	Mitochondrial fission 1 protein	Q9Y3D6	Q9Y3D6		-0.0169969	0.132136	0.0388009	-0.0551931	-0.0320417	-0.0682451	0.0102555	0.136737	-0.0240399	-0.0134209	-0.0799785	0.068165	-0.0679408	0.00601286	0.0337317	-0.0351605	-0.0296077	0.0914292	-0.00320902	-0.147804	3	3	3	21.7	21.7	21.7	16.937	0	10.498	163890000	8
FKBP10	Peptidyl-prolyl cis-trans isomerase FKBP10	Q96AY3;Q96AY3-2	Q96AY3		0.00479689	-0.0181584	0.120407	0.0892199	0.140256	0.233659	0.073486	0.0133108	0.115016	-0.25252	0.249634	-0.831196	-0.0298639	-0.0511699	-0.0294864	-0.0109992	0.0343471	-0.199078	0.127723	0.164246	4	3	3	8.8	7.6	7.6	64.244	0	9.5957	36346000	8
FKBP15	FK506-binding protein 15	Q5T1M5-2;Q5T1M5;Q5T1M5-3	Q5T1M5-2;Q5T1M5		0.253361	-0.138877	0.111438	-0.140837	-0.0163857	-0.221628	-0.0780054	-0.0294675	-0.0218707	0.0884378	0.0297204	0.160341	-0.08773	0.0866274	-0.042697	0.00532265	-0.0108714	0.0462226	-0.0657246	0.0162544	3	3	3	3.6	3.6	3.6	132.47	0	7.5266	80625000	6
FKBP1A	Peptidyl-prolyl cis-trans isomerase FKBP1A	P62942	P62942		-0.156219	0.102642	-0.063059	-0.160583	-0.0598468	0.131863	0.0729207	0.116605	-0.14974	-0.0191636	-0.0675539	0.0103058	-0.0677011	0.285265	-0.0866294	0.063214	-0.11173	0.0219162	-0.0020196	0.0831436	2	2	2	25	25	25	11.951	0	31.83	941410000	34
FKBP2	Peptidyl-prolyl cis-trans isomerase FKBP2	P26885	P26885		0.00283614	0.234378	-0.0255767	-0.0693913	0.033273	0.00586352	0.032381	0.0309702	-0.186952	0.180999	-0.10686	0.20623	0.0753292	-0.170817	-0.00724173	-0.0035861	-0.0995764	-0.0980492	0.00796537	-0.0985456	6	6	6	31	31	31	15.649	0	10.045	119290000	13
FKBP3	Peptidyl-prolyl cis-trans isomerase FKBP3	Q00688	Q00688		-0.0190645	0.20125	-0.0032281	-0.0300568	-0.00474185	-0.0293848	0.0238143	0.0175732	-0.106245	0.00195618	-0.0703003	0.0871979	0.00592223	0.103134	0.0573813	-0.0121137	-0.140943	-0.0345989	-0.0889115	-0.0150112	14	14	14	58.9	58.9	58.9	25.177	0	115.92	3040800000	101
FKBP4	Peptidyl-prolyl cis-trans isomerase FKBP4;Peptidyl-prolyl cis-trans isomerase FKBP4, N-terminally processed	Q02790	Q02790		0.0717354	-0.0374616	0.0340327	0.0240517	0.0253109	-0.0290752	0.0173263	-0.000614524	0.0667524	0.00104313	0.041124	-0.0833946	-0.00239515	-0.0854277	-0.0376534	-5.46463e-05	-0.0162013	-0.0169954	-0.0265138	-0.00195843	30	30	30	69.5	69.5	69.5	51.804	0	291.09	6789700000	268
FKBP5	Peptidyl-prolyl cis-trans isomerase FKBP5;Peptidyl-prolyl cis-trans isomerase FKBP5, N-terminally processed	Q13451;Q13451-2	Q13451		0.0550865	-0.0696716	0.108092	-0.071949	-0.0196659	-0.0360862	-0.00942048	-0.122722	0.0252937	-0.0355337	0.0167423	-0.0359083	0.0688085	0.0224161	0.013412	0.0484712	-0.030673	-0.00268892	-0.0389068	0.058534	8	8	8	24.7	24.7	24.7	51.212	0	30.85	403350000	26
FKBP8	Peptidyl-prolyl cis-trans isomerase FKBP8	Q14318-2;Q14318;Q14318-3	Q14318-2;Q14318;Q14318-3		-0.0633727	0.110353	-0.0656823	0.0114958	-0.0390222	-0.0179678	0.0476762	0.0591467	-0.119829	1.97403e-05	-0.010956	0.00634155	-0.0175015	0.14629	0.0376155	-0.0564166	-0.0178599	-0.00382427	0.00410986	-0.0669855	10	10	10	29.3	29.3	29.3	44.648	0	33.856	523180000	38
FKBP9	Peptidyl-prolyl cis-trans isomerase FKBP9	O95302;O95302-3;O95302-2;Q75LS8	O95302;O95302-3;O95302-2		0.0402701	-0.0106459	-0.0441123	0.0246954	0.00720654	0.0526644	-0.141812	0.0705582	-0.00225902	0.020606	-0.0158533	0.027223	0.0183322	-0.202121	0.0378594	0.0155923	0.00313553	0.0500968	0.0120728	-0.019878	7	7	6	10.5	10.5	9.3	63.083	0	10.35	305750000	14
FLII	Protein flightless-1 homolog	Q13045-2;Q13045;Q13045-3	Q13045-2;Q13045;Q13045-3		0.00463215	-0.126238	-0.023601	0.0376412	0.0114121	0.0251318	0.0067049	-0.0919148	0.0703822	0.0207032	0.0425561	-0.0698337	0.028235	-0.103113	-0.00991613	-0.0425411	0.0461099	2.97055e-05	0.0375509	0.0796987	12	12	12	11.4	11.4	11.4	138.49	0	24.753	310990000	37
FLNA	Filamin-A	P21333-2;P21333	P21333-2;P21333		0.0536269	-0.10201	0.0302615	0.0199677	0.0264666	0.000602961	0.00297689	-0.0784081	0.0768096	-0.0276054	0.0489494	-0.081194	-0.0320622	-0.0586507	-0.053872	-0.00772829	0.0404505	-0.000342511	0.039421	0.0459709	107	107	96	49.5	49.5	46.9	280.01	0	323.31	35049000000	1119
FLNB	Filamin-B	O75369-8;O75369-2;O75369-9;O75369;O75369-6;O75369-3;O75369-7;O75369-5;O75369-4	O75369-8;O75369-2;O75369-9;O75369;O75369-6;O75369-3;O75369-7;O75369-5;O75369-4		0.0246277	-0.0827687	-0.023763	0.0288113	0.0371689	-0.025291	-0.0483573	-0.0357319	0.0211458	0.0149038	0.0373806	-0.0596588	-0.0177188	0.0175462	-0.0126807	0.0356669	-0.000282615	-0.0120458	-0.000964068	0.0456421	46	37	36	20.7	18.6	18.3	281.63	0	125.92	1368300000	132
FLOT1	Flotillin-1	O75955-2;O75955	O75955-2;O75955		0.0382645	-0.055398	0.023226	-0.162508	0.00186119	0.00658097	-0.0290974	0.214293	0.00279069	-0.0249882	-0.0323029	0.00320882	-0.0462783	0.0227373	-0.220062	0.0145178	0.00540528	0.0263102	0.183991	-0.0289214	4	4	4	14	14	14	42.08	0	10.493	122770000	15
FLOT2	Flotillin-2	Q14254	Q14254		-0.00366989	0.038628	0.0227822	-0.0654936	-0.0178412	-0.00256038	0.0926074	0.0337759	0.00775218	-0.0268015	-0.0860304	0.0829796	-0.121962	0.121623	-0.113657	0.0839793	-0.0327058	0.0148228	0.021416	-0.106014	12	12	12	29.7	29.7	29.7	47.064	0	32.176	489690000	33
FLYWCH2	FLYWCH family member 2	Q96CP2	Q96CP2		-0.160607	-0.00784332	-0.137196	-0.00730027	-0.0779291	-0.0912872	-0.235417	0.0665004	-0.193649	0.167452	-0.095732	0.198405	-0.0547357	0.579258	0.345201	0.0182121	-0.0747817	-0.10859	-0.0319906	-0.154337	4	4	4	30.7	30.7	30.7	14.563	0	13.754	82722000	6
FMR1	Fragile X mental retardation protein 1	Q06787-8;Q06787-5;Q06787-9;Q06787-3;Q06787	Q06787-8;Q06787-5;Q06787-9;Q06787-3;Q06787		-0.00649449	-0.108509	-0.0142677	-0.00092192	-0.00780831	0.00768132	-0.0314205	-0.018137	0.0560598	0.0425566	0.0283136	0.0484044	0.0123296	0.0215965	-0.0823099	0.0295105	-0.0267299	-0.0133962	0.0378595	-0.0306857	15	15	1	25.4	25.4	1.9	66.245	0	35.867	678900000	54
FN3KRP	Ketosamine-3-kinase	Q9HA64	Q9HA64		-0.126732	0.184076	-0.203815	-0.183793	-0.0710238	-0.120886	-0.0250092	0.125097	-0.122312	-0.113488	-0.00735599	0.129633	-0.0346582	0.344423	0.10384	-0.0174286	0.0117439	0.0261428	0.130595	-0.0854192	4	4	4	12.9	12.9	12.9	34.412	0	8.7797	96949000	12
FNBP1	Formin-binding protein 1	Q96RU3-4;Q96RU3-3;Q96RU3-5;Q96RU3-2;Q96RU3	Q96RU3-4;Q96RU3-3;Q96RU3-5;Q96RU3-2;Q96RU3		0.0520323	0.00190014	0.0979032	0.159261	-0.0359819	-0.00929332	-0.144881	-0.00129926	0.00527644	-0.0910362	0.0784231	-0.0709043	-0.00721426	0.0328363	-0.265522	0.0333812	0.0754943	-0.0467283	-0.0218503	0.101835	5	5	5	8.3	8.3	8.3	64.056	0	8.7738	90566000	8
FOXO3	Forkhead box protein O3	O43524;O43524-2;P98177-2;A8MYZ6;P98177;Q12778	O43524;O43524-2		-0.196579	-0.0808266	0.1175	-0.0865071	0.307737	0.350957	-0.00489274	0.0209163	-0.333034	-0.0138366	0.163636	-0.0015277	0.525313	-0.321876	-0.109671	0.118928	-0.332315	0.0717454	-0.244407	-0.00762928	3	3	3	6.4	6.4	6.4	71.276	0	10.034	37729000	4
FRG1	Protein FRG1	Q14331	Q14331		0.0945107	-0.123854	-0.0389989	-0.0463888	-0.0217199	-0.0995836	0.0874297	-0.0597873	0.136443	0.0941614	-0.0569149	0.071912	-0.0453176	-0.175643	0.024338	-0.123046	0.181834	-0.0635456	0.0405179	0.0672839	5	5	4	19	19	16.3	29.172	0	6.9107	80069000	6
FSCN1	Fascin	Q16658	Q16658		0.0028418	-0.00870663	0.0137486	-0.00134028	0.00630397	-0.0586431	-0.00835943	-0.0529783	-0.00432706	-0.0193752	-0.0284365	-0.0332308	-0.0182263	0.032883	0.0162488	0.0161832	0.0129046	0.0316304	0.0229634	0.0215464	21	21	21	48.7	48.7	48.7	54.529	0	193.53	4949700000	198
FTO	Alpha-ketoglutarate-dependent dioxygenase FTO	Q9C0B1;Q9C0B1-4;Q9C0B1-2	Q9C0B1		0.054474	-0.0303947	-0.0119524	0.071746	-0.0183587	-0.068377	-0.0150576	0.0248592	0.0213786	-0.108912	0.0486066	-0.0395646	0.0584608	-0.112146	-0.209054	-0.0237371	0.137368	0.0437919	0.0478624	0.0726371	7	7	7	14.5	14.5	14.5	58.281	0	12.078	161120000	29
FTSJ3	pre-rRNA processing protein FTSJ3	Q8IY81	Q8IY81		-0.00646207	-0.0216287	-0.040958	-0.099278	-0.0196262	-0.0309444	0.0519642	-0.113747	0.0260792	-0.0618832	0.0743467	-0.0103789	-0.0378165	0.00203854	0.0645838	-0.0761498	0.0360247	0.0915041	0.0173262	0.0986365	7	7	7	9.2	9.2	9.2	96.557	0	16.091	125780000	15
FUBP1	Far upstream element-binding protein 1	Q96AE4;Q96AE4-2	Q96AE4;Q96AE4-2		-0.0216754	0.235606	-0.0126935	-0.0389023	-0.00732232	0.0648194	-0.0110722	0.107643	-0.0934156	0.0514463	-0.0715927	0.128674	-0.00788298	-0.0364512	0.0469832	-3.74801e-05	-0.12575	-0.0820879	-0.122942	-0.0597149	26	21	20	44.7	41	39.6	67.56	0	157.9	3458900000	146
FUBP3	Far upstream element-binding protein 3	Q96I24;Q96I24-2	Q96I24		0.00133196	-0.0210139	0.0250022	-0.083172	0.0208998	-0.0325765	0.0112836	0.0136752	0.0510727	-0.00906334	0.0389218	-0.00593454	-0.00536051	-0.0312451	0.00311595	-0.00899172	0.0087283	-0.00548778	-0.0158032	-0.0117519	16	13	13	28.3	25.2	25.2	61.64	0	52.568	1023600000	70
FUCA2	Plasma alpha-L-fucosidase	Q9BTY2;Q9BTY2-2	Q9BTY2;Q9BTY2-2		0.0104226	-0.0538421	0.111136	0.105532	-0.0129211	0.0469019	0.00198582	-0.248589	0.0379531	-0.0308994	0.0800114	-0.161553	-0.00703306	-0.0422418	-0.0797549	0.0765763	0.0803294	-0.0513841	0.0173718	0.0636281	6	6	6	14.3	14.3	14.3	54.066	0	10.841	75899000	17
FUNDC2	FUN14 domain-containing protein 2	Q9BWH2	Q9BWH2		-0.0948085	0.230301	-0.124314	-0.19652	-0.156603	-0.0663953	-0.125111	0.21303	-0.0813799	-0.0652878	-0.027813	-0.0639165	-0.0412097	0.146809	-0.217768	-0.0208158	0.26043	-0.15457	0.355786	0.173788	2	2	2	10.6	10.6	10.6	20.675	0.00030303	3.3149	46237000	6
FUS	RNA-binding protein FUS	P35637-2;P35637	P35637-2;P35637		-0.330966	0.286886	-0.263205	-0.108483	0.0277092	-0.0390327	0.151286	0.18187	-0.197743	0.140032	-0.0886452	0.192054	0.0565598	0.452518	0.156769	-0.140713	-0.264818	-0.15386	-0.133217	0.0186287	10	10	8	14.1	14.1	14.1	53.354	0	112.66	3708500000	122
FXN	Frataxin, mitochondrial;Frataxin intermediate form;Frataxin(56-210);Frataxin(78-210);Frataxin mature form	Q16595-2;Q16595-3;Q16595	Q16595-2;Q16595-3;Q16595		0.0670499	-0.666395	-0.210637	-0.0204176	-0.250867	0.295676	-0.186367	-0.271323	0.31341	0.676761	0.173652	0.345402	0.256898	-0.00671965	-0.0303993	-0.094793	-0.406423	-0.302106	0.148751	0.112476	2	2	2	17	17	17	19.094	0	4.6293	34659000	5
FXR1	Fragile X mental retardation syndrome-related protein 1	P51114-2;P51114;P51114-3	P51114-2;P51114;P51114-3		-0.0238319	0.0535451	0.105071	0.151507	-0.0799944	0.0309847	-0.0173178	0.206115	-0.0985209	-0.0198277	-0.11551	-0.268161	0.0123204	0.176587	-0.0598482	0.0335844	0.0221024	-0.0960794	0.0322737	-0.101368	9	6	6	17.6	13.2	13.2	60.791	0	16.234	200330000	14
FXR2	Fragile X mental retardation syndrome-related protein 2	P51116	P51116		-0.0794733	0.0456932	0.0327272	-0.0931415	-0.0230365	0.0887599	0.0544462	0.0657031	-0.0567311	0.028036	-0.0555261	0.0800014	0.0291668	0.0197999	0.0185171	-0.0097353	0.0174148	-0.0923441	-0.0439545	-0.0826926	14	12	11	21	18.6	17.4	74.222	0	36.746	370020000	28
G3BP1	Ras GTPase-activating protein-binding protein 1	Q13283;Q13283-2	Q13283		0.0842942	-0.0420814	-0.0147167	0.00345373	0.0434048	0.0247834	0.0309328	-0.0128583	0.105465	-0.00399532	0.0601159	-0.0545712	-0.0498855	-0.167056	-0.0714693	-0.00276451	0.00878569	-0.0264293	-0.00246735	0.0306901	16	16	15	45.7	45.7	43.1	52.164	0	151.66	1511400000	77
G3BP2	Ras GTPase-activating protein-binding protein 2	Q9UN86-2;Q9UN86	Q9UN86-2;Q9UN86		0.0411118	-0.0314174	-0.0352994	0.0564222	0.0312759	-0.00900054	0.0158309	0.029864	0.0381868	0.0222946	0.00127566	0.0574593	-0.0210301	-0.0117738	-0.0298209	-0.0489286	-0.026855	-0.0555068	-0.0548245	-0.0256334	6	5	5	14.3	11.6	11.6	50.817	0	24.399	473760000	23
G6PD	Glucose-6-phosphate 1-dehydrogenase	P11413;P11413-2;P11413-3	P11413;P11413-2;P11413-3		0.0601343	0.0849534	-0.000130177	0.0687347	-0.0234472	-0.0720655	0.0199351	-0.0249622	0.0463318	-0.0281723	0.0141804	-0.0836582	-0.0593606	-0.0148926	-0.00324339	-0.0233762	0.00900748	-0.0252033	0.00834838	-0.00948334	21	21	21	46.6	46.6	46.6	59.256	0	78.155	1323600000	76
GAA	Lysosomal alpha-glucosidase;76 kDa lysosomal alpha-glucosidase;70 kDa lysosomal alpha-glucosidase	P10253	P10253		0.038542	0.740563	0.574766	0.400235	-0.0971226	-0.263686	0.251588	-1.37664	0.334498	-0.140811	0.756266	-0.0319135	0.0721128	-0.726617	-0.366915	0.0916906	0.106118	-0.0863121	-0.0318449	-0.300887	2	2	2	2.9	2.9	2.9	105.32	0	6.2027	37292000	9
GABARAPL2	Gamma-aminobutyric acid receptor-associated protein-like 2	P60520	P60520		0.0474359	0.277184	0.0603383	0.145356	0.102425	-0.0597786	0.0972598	0.189754	-0.0125664	0.00953856	0.0160217	-0.181457	0.0384479	-0.130719	-0.133469	0.0387851	-0.143321	-0.151361	-0.120902	-0.145341	5	5	5	35.9	35.9	35.9	13.667	0	10.735	160150000	13
GABPA	GA-binding protein alpha chain	Q06546	Q06546		0.330141	0.230918	0.140503	0.138854	0.0253279	0.467708	-0.0833865	0.0698334	0.230431	0.0411335	0.0609232	-0.164264	0.0571969	-1.36683	0.122831	-0.161491	0.121084	-0.159826	-0.0470778	-0.11038	2	2	2	4.6	4.6	4.6	51.295	0.0027601	2.3396	19816000	6
GABPB1	GA-binding protein subunit beta-1	Q06547-4;Q06547-3;Q06547-2;Q06547	Q06547-4;Q06547-3;Q06547-2;Q06547		0.0343911	-0.0606114	-0.339343	0.0603987	0.0256758	0.0773058	0.015841	0.0478203	-0.0135082	0.0829491	0.0700094	0.0294113	-0.0548963	-0.100801	0.0401812	-0.0609443	-0.0690601	0.0558411	0.234781	-0.131811	3	3	2	7.5	7.5	5.5	36.949	0.0061131	1.6995	31315000	4
GADD45GIP1	Growth arrest and DNA damage-inducible proteins-interacting protein 1	Q8TAE8	Q8TAE8		0.143137	0.304081	0.316616	0.480066	0.00864401	-0.229686	-0.215047	0.193737	0.00561571	-0.160584	0.518189	-0.640945	-0.140305	0.187386	-1.06463	0.190245	-0.103022	-0.0379815	-0.378777	0.566895	5	5	5	33.8	33.8	33.8	25.384	0	10.717	45875000	12
GAK	Cyclin-G-associated kinase	O14976-2;O14976	O14976-2;O14976		-0.160437	-0.364039	0.00873698	0.250219	-0.0435974	-0.0281545	0.0532831	0.105075	0.0628179	0.309557	0.290343	-0.186077	0.024723	-0.443988	-0.696603	0.00557156	0.170794	0.44961	0.195905	-0.0601082	3	3	3	2.9	2.9	2.9	134.46	0	4.5233	50276000	5
GALK1	Galactokinase	P51570;P51570-2	P51570;P51570-2		0.051844	0.0312862	0.0176962	0.0180301	0.00442094	0.0455558	-0.170976	0.131836	-0.0147769	-0.0470609	0.15231	-0.149292	-0.0142338	-0.0369732	-0.0580822	-0.031237	0.0150375	-0.0578143	0.0528423	0.00321704	10	10	10	29.8	29.8	29.8	42.272	0	26.831	318070000	28
GALM	Aldose 1-epimerase	Q96C23	Q96C23		-0.0333537	0.156725	0.0872605	0.0351986	-0.0551038	0.0727773	0.0222495	-0.0602722	-0.0641412	-0.101297	-0.0213089	0.0309923	0.0016695	0.137966	-0.0682403	-0.0874099	-0.0745165	-0.0634402	0.00804968	0.0198258	5	5	5	21.1	21.1	21.1	37.765	0	20.798	116670000	15
GALNT1	Polypeptide N-acetylgalactosaminyltransferase 1;Polypeptide N-acetylgalactosaminyltransferase 1 soluble form	Q10472	Q10472		0.386025	0.257574	-0.212359	-0.168591	-0.298948	0.234566	0.093862	-0.621267	0.436486	0.304932	0.223805	-0.624467	0.152996	-2.02005	0.451051	-0.0428121	0.132364	0.391341	0.713663	0.153461	3	3	3	7.7	7.7	7.7	64.218	0	3.9188	15872000	4
GALNT2	Polypeptide N-acetylgalactosaminyltransferase 2;Polypeptide N-acetylgalactosaminyltransferase 2 soluble form	Q10471;Q10471-2	Q10471		0.0528273	-0.0832328	0.0588384	-0.0782007	0.0653046	0.0598229	-0.0574555	-0.0524729	0.00593698	-0.0259645	0.0405657	-0.0634528	0.000822924	-0.100333	0.0593177	0.0552352	0.0223322	-0.0202308	0.0136937	-0.00972366	11	11	10	18.4	18.4	17.2	64.732	0	18.162	292780000	28
GALNT7	N-acetylgalactosaminyltransferase 7	Q86SF2	Q86SF2		0.0698192	-0.109749	-0.00205527	0.0696211	0.0505715	0.110854	-0.0380364	-0.0445722	0.0693014	0.00401831	0.0281006	-0.0497852	0.0040638	-0.139396	-0.0254703	0.0424001	-0.0583302	-0.0238669	-0.00922556	-0.00463158	3	3	3	4.3	4.3	4.3	75.388	0	4.8031	112980000	11
GANAB	Neutral alpha-glucosidase AB	Q14697;Q14697-3	Q14697		0.043463	-0.0525656	0.0333501	0.0218355	0.0198885	-0.0389799	-0.00228491	-0.047579	0.0177109	-0.0331326	-0.00563639	-0.0120863	0.000145629	0.00693589	-0.0175765	0.0221433	-0.00673118	0.020551	-0.00704908	-0.0187715	33	33	1	39.2	39.2	2.2	106.87	0	225.87	6421000000	235
GAPDH	Glyceraldehyde-3-phosphate dehydrogenase	P04406;P04406-2;O14556	P04406;P04406-2		-0.0524072	0.147419	-0.0122495	0.0311256	-0.0529448	-0.171498	-0.00508165	-0.0521134	-0.140329	-0.0105831	-0.0965565	0.0119915	0.0228229	0.235792	0.0798694	0.0235084	-0.0306371	0.0296517	0.0251788	-0.0393276	20	20	20	64.2	64.2	64.2	36.053	0	323.31	52749000000	529
GAPVD1	GTPase-activating protein and VPS9 domain-containing protein 1	Q14C86-5;Q14C86-2;Q14C86;Q14C86-6;Q14C86-4;Q14C86-3	Q14C86-5;Q14C86-2;Q14C86;Q14C86-6;Q14C86-4;Q14C86-3		0.0304144	-0.0269008	0.000914276	0.0381525	0.0357944	0.00849366	-0.0137962	-0.00673252	0.0723169	-0.00787296	0.0403027	-0.0210484	-1.6883e-05	-0.0800044	-0.0882241	-0.0218825	-0.0745788	0.0196398	0.040433	-0.0017736	17	17	17	13.6	13.6	13.6	162.23	0	36.905	464510000	46
GARS	Glycine--tRNA ligase	P41250	P41250		0.0643893	-0.0213206	0.0122107	-0.000934601	0.00420322	-0.0250631	-0.0193244	-0.0331329	0.0310135	-0.0403206	0.0486847	-0.0605656	-0.0175443	0.0197178	0.00688124	-0.0112441	-0.0251134	-0.0126762	-0.012695	0.036465	16	16	16	22.5	22.5	22.5	83.165	0	84.28	1267700000	73
GART	Trifunctional purine biosynthetic protein adenosine-3;Phosphoribosylamine--glycine ligase;Phosphoribosylformylglycinamidine cyclo-ligase;Phosphoribosylglycinamide formyltransferase	P22102;P22102-2	P22102;P22102-2		0.0607016	-0.0890284	0.0299335	0.0303513	-0.0284113	0.00188126	-0.00382662	-0.103602	0.0446465	-0.0438519	0.02024	-0.0331974	-0.0456918	0.03135	-0.0227842	0.0293239	0.0166701	0.0290196	-0.0117742	0.0316811	36	36	36	39.4	39.4	39.4	107.77	0	149.11	2971200000	174
GATAD2B	Transcriptional repressor p66-beta	Q8WXI9	Q8WXI9		0.0380461	-0.175232	-0.109853	-0.081576	-0.0724834	0.149184	0.0595315	0.0533752	0.0963709	0.0254097	0.0595207	0.132124	0.0989329	-0.213749	-0.0375949	0.0422708	0.123103	-0.0922964	-0.0554259	-0.0960266	4	4	3	9.4	9.4	7.6	65.26	0	12.761	130250000	11
GATC	Glutamyl-tRNA(Gln) amidotransferase subunit C, mitochondrial	O43716	O43716		0.384567	0.408384	0.132638	0.132167	0.0925305	0.176123	-0.374714	0.0239126	-0.0800458	-0.017299	-0.224668	0.286696	0.151553	-1.19462	-0.259436	0.149279	0.0545488	0.00154873	-0.449265	0.549735	3	3	3	33.8	33.8	33.8	15.086	0	16.22	42974000	5
GBA	Glucosylceramidase	P04062-4;P04062-5;P04062-2;P04062;P04062-3	P04062-4;P04062-5;P04062-2;P04062;P04062-3		0.0396598	0.151839	0.0363388	-0.0301656	-0.0277579	0.0311658	-0.0339794	0.00100201	-0.00864005	-0.0135554	0.0591571	-0.071611	-0.00677414	-0.147321	-0.0542111	-0.112769	0.00942227	-0.0507533	0.13039	0.0421939	5	5	5	10.7	10.7	10.7	50.316	0	9.0848	108910000	11
GBAS	Protein NipSnap homolog 2	O75323;O75323-2	O75323;O75323-2		-0.0220214	0.011992	0.0112477	0.00697155	-0.0304057	-0.0755145	0.0495006	-0.114548	0.0149497	-0.0241864	-0.0813896	0.0515419	-0.0384451	0.0306372	0.0438668	0.0475606	0.0275903	0.0826892	0.0428824	-0.0912889	5	5	3	14.7	14.7	11.9	33.742	0	16.736	487510000	22
GBF1	Golgi-specific brefeldin A-resistance guanine nucleotide exchange factor 1	Q92538-3;Q92538-2;Q92538	Q92538-3;Q92538-2;Q92538		0.0521992	-0.408679	0.324624	-0.0792634	0.0459911	0.228357	-0.266932	0.11554	0.4114	0.421375	0.230819	-0.054663	0.0930779	-0.714322	-0.287633	0.201942	0.199878	-0.351992	-0.367257	0.149168	7	7	7	5.5	5.5	5.5	206.01	0	25.908	93606000	14
GCLC	Glutamate--cysteine ligase catalytic subunit	P48506	P48506		0.000486404	-0.15959	0.101844	-0.0472767	0.00221958	-0.0661645	-0.00934249	-0.148984	0.213888	-0.0445768	0.0353541	-0.0512169	-0.169374	0.0159126	0.070761	0.0242257	0.243106	-0.0586214	0.0309173	-0.0399377	7	7	7	13.7	13.7	13.7	72.765	0	7.8346	139730000	11
GCLM	Glutamate--cysteine ligase regulatory subunit	P48507;P48507-2	P48507		0.111723	-0.731034	-0.188638	-0.0870782	0.0473791	-0.0691455	-0.275358	-0.0969548	0.477726	-0.0120335	0.0815549	-0.0184476	0.415204	-0.79133	0.739392	-0.662878	0.438885	0.0899117	-0.183196	0.65795	3	3	3	16.1	16.1	16.1	30.727	0	5.0173	44331000	6
GCN1L1	Translational activator GCN1	Q92616	Q92616		-0.0132692	0.00294775	-0.0341731	0.00135708	0.0075346	-0.0131658	0.0260133	-0.0189871	-0.0173385	-0.0262337	-0.031936	-0.0188852	0.0040843	0.0189961	0.0177941	0.0175817	0.00812134	0.0056088	0.0142568	-0.00667626	64	64	64	24.6	24.6	24.6	292.75	0	192.06	2297200000	200
GDI1	Rab GDP dissociation inhibitor alpha	P31150	P31150		0.0539451	-0.0879124	0.0916922	-0.0301491	0.0406426	-0.0328808	0.00787666	0.0370064	0.0739331	0.0164788	0.0258036	-0.202916	-0.00609493	-0.0824212	-0.0626432	-0.00534144	0.0291931	-0.0275979	0.0877025	0.0173138	22	12	12	51.2	29.5	29.5	50.582	0	45.128	740780000	65
GDI2	Rab GDP dissociation inhibitor beta	P50395;P50395-2	P50395;P50395-2		0.0563261	0.0296583	0.0634787	0.0211872	0.0140749	-0.0398019	-0.0111463	-0.116682	0.0619729	-0.0499573	0.074976	-0.0759461	0.0146396	-0.0847599	-0.0585691	-0.00683871	-0.00871482	-0.0161521	0.0179088	0.0579766	25	25	15	60.7	60.7	38.9	50.663	0	323.31	5477600000	253
GEMIN4	Gem-associated protein 4	P57678	P57678		-0.0305865	0.0350708	0.0222613	0.0718258	-0.0579661	0.0246316	-0.0038169	-0.116521	-0.0831044	-0.0392222	0.0104145	0.000461757	-0.119605	0.200396	0.0196374	0.042625	0.0105565	0.0371149	-0.0240878	-0.0564544	8	8	8	7.6	7.6	7.6	120.04	0	16.787	589660000	16
GEMIN5	Gem-associated protein 5	Q8TEQ6	Q8TEQ6		0.00362602	0.0272949	0.0937419	0.00223409	0.0326419	0.0199609	0.0541749	0.0335371	-0.0845002	-0.0687457	-0.187125	0.00575447	-0.0804066	0.128002	-0.0367593	0.0337794	0.00606611	-0.00665364	0.0586833	-0.0916758	15	15	15	11.5	11.5	11.5	168.59	0	36.99	283060000	28
GEMIN6	Gem-associated protein 6	Q8WXD5	Q8WXD5		-0.063133	0.228412	-0.0168182	-0.0101062	-0.0171226	-0.0981163	-0.169777	0.178453	-0.173338	0.0404902	-0.0876355	0.0286095	0.000399306	0.0658177	0.199603	-0.0405878	0.0120524	-0.0181758	-0.0142954	-0.101101	5	5	5	26.9	26.9	26.9	18.824	0	12.684	202270000	12
GEMIN8	Gem-associated protein 8	Q9NWZ8	Q9NWZ8		-0.157334	0.163366	-0.236749	-0.023894	-0.17078	-0.240983	0.0179741	-0.0373154	0.0153735	0.0786162	-0.0950738	-0.153357	-0.0123055	0.316136	0.304415	-0.0444708	-0.0595112	0.0447067	0.252818	-0.0180018	2	2	2	8.3	8.3	8.3	28.636	0.002733	2.2724	51372000	3
GET4	Golgi to ER traffic protein 4 homolog	Q7L5D6;Q7L5D6-2	Q7L5D6;Q7L5D6-2		-0.0194335	-0.085945	-0.0789301	0.458887	0.0464429	0.217925	-0.181724	0.5202	-0.463536	0.0342181	0.172042	0.289985	0.1075	-0.301974	-0.408584	-1.5507	-0.00966915	0.451757	0.463744	0.281423	2	2	2	7.3	7.3	7.3	36.504	0	5.6736	8705600	5
GFM1	Elongation factor G, mitochondrial	Q96RP9;Q96RP9-2	Q96RP9;Q96RP9-2		-0.0340015	-0.0914674	0.0987245	0.0372793	-0.0092743	0.00758862	0.106345	0.0196531	-0.0168126	-0.00671902	-0.0230429	-0.245096	0.0596869	-0.0793797	-0.167226	0.072997	0.0540185	0.0936459	0.0291448	0.0375658	9	9	9	11.7	11.7	11.7	83.471	0	20.673	148950000	15
GFPT1	Glutamine--fructose-6-phosphate aminotransferase [isomerizing] 1	Q06210-2;Q06210;O94808	Q06210-2;Q06210		-0.0308004	0.0357409	-0.0180844	-0.0064209	0.0185221	-0.00803581	0.0665732	-0.0432236	-0.0519596	-0.0307072	0.000769436	-0.0226912	0.0252647	0.0548734	0.0365979	-0.0231057	-0.0444879	0.00887533	-0.0251527	0.00108302	19	19	19	34.2	34.2	34.2	76.758	0	106.96	962460000	71
GGA1;GGA2;GGA3	ADP-ribosylation factor-binding protein GGA1;ADP-ribosylation factor-binding protein GGA2;ADP-ribosylation factor-binding protein GGA3	Q9UJY5-4;Q9UJY5-3;Q9UJY5;Q9UJY5-6;Q9UJY5-2;Q9UJY4;Q9NZ52-4;Q9NZ52	Q9UJY5-4;Q9UJY5-3;Q9UJY5;Q9UJY5-6;Q9UJY5-2;Q9UJY4;Q9NZ52-4;Q9NZ52		-0.0604347	-0.0167882	-0.0136588	-0.17091	-0.017251	-0.0655937	0.143474	0.1123	0.0733582	-0.0331341	-0.0896965	0.0712101	0.065013	0.257361	-0.0372073	0.120253	-0.0172364	-0.208008	-0.0367097	-0.13271	2	2	2	2.7	2.7	2.7	61.378	0.00031182	3.5969	5395800000	3
GGCT	Gamma-glutamylcyclotransferase	O75223;O75223-3;O75223-2;O75223-4	O75223;O75223-3		0.0050014	0.0694703	0.0722797	0.150887	-0.0472501	0.100442	-0.0493595	0.00386763	-0.0316608	0.0118276	-0.0080533	-0.024554	-0.0467064	0.0276564	-0.100119	-0.00205269	-0.0616837	-0.049811	-0.0111292	-0.0654218	7	7	7	43.1	43.1	43.1	21.007	0	18.056	810670000	55
GGH	Gamma-glutamyl hydrolase	Q92820	Q92820		-0.00324723	0.0210683	-0.00489321	0.0172407	0.0256685	-0.0207773	0.0722533	-0.105319	-0.0326214	-0.0314686	-0.0685484	-0.0290388	-0.0110641	0.0364061	-0.0282415	-0.0135594	0.00383821	-0.0105171	0.0918899	0.0345618	7	7	7	25.5	25.5	25.5	35.964	0	21.982	340580000	32
GHITM	Growth hormone-inducible transmembrane protein	Q9H3K2	Q9H3K2		0.0727784	0.00270492	0.0729276	-0.0581587	0.00774097	0.015131	-0.102492	-0.160811	-0.051061	0.0773329	0.0348204	-0.0154966	-0.0242862	-0.0820606	-0.223715	0.0922927	-0.048907	0.0079123	0.275027	0.0519511	3	3	3	8.7	8.7	8.7	37.205	0	6.507	84976000	9
GID8	Glucose-induced degradation protein 8 homolog	Q9NWU2	Q9NWU2		-0.164444	0.170615	-0.0832344	-0.0775352	-0.0046361	0.0357768	0.116416	0.221324	-0.143018	-0.0090436	-0.0375775	0.0875482	0.0474918	0.145704	0.0380983	0.0650942	-0.0985546	-0.00260606	-0.162531	-0.201258	4	4	4	21.1	21.1	21.1	26.748	0	9.0232	133160000	11
GIGYF2	PERQ amino acid-rich with GYF domain-containing protein 2	Q6Y7W6-4;Q6Y7W6-5;Q6Y7W6;Q6Y7W6-3	Q6Y7W6-4;Q6Y7W6-5;Q6Y7W6;Q6Y7W6-3		-0.172506	-0.01927	-0.104579	-0.261402	-0.0585654	-0.114974	-0.0588134	0.0727085	-0.0693119	0.0733682	0.0178475	0.134876	0.057843	0.257832	0.100999	-0.0123706	0.0660133	-0.0431439	0.0194188	0.0576603	14	14	14	13	13	13	148.63	0	42.599	674390000	34
GINS3	DNA replication complex GINS protein PSF3	Q9BRX5;Q9BRX5-3	Q9BRX5;Q9BRX5-3		-0.213761	-0.248276	-0.356076	0.11513	-0.0788219	-0.0662439	-0.123076	0.0830644	-0.197966	0.26412	-0.299116	0.0230857	0.133601	0.0305608	0.168115	0.063353	0.299447	0.0546254	0.135627	0.156238	2	2	2	11.1	11.1	11.1	24.534	0	5.4313	32062000	4
GINS4	DNA replication complex GINS protein SLD5;DNA replication complex GINS protein SLD5, N-terminally processed	Q9BRT9;Q9BRT9-2	Q9BRT9		0.0620916	-0.103792	0.0600483	-0.204813	0.0769692	0.0056869	-0.0362194	-0.0518227	-0.0380185	0.0398421	0.0822925	-0.00808555	-0.00073795	-0.0928723	0.0348251	0.000403404	0.0591615	-0.0310452	0.12069	-0.0309737	4	4	4	22	22	22	26.047	0	24.931	77352000	12
GIPC1	PDZ domain-containing protein GIPC1	O14908;O14908-2	O14908;O14908-2		0.242304	-0.447295	0.186312	0.113034	0.111093	-0.0343476	-0.364723	0.161781	0.192095	0.0341685	0.20822	-0.384309	0.0938044	-0.3106	-0.14514	0.24134	0.0979091	-0.00184674	-0.176622	0.126452	6	6	6	19.8	19.8	19.8	36.049	0	17.532	108240000	16
GIT1	ARF GTPase-activating protein GIT1	Q9Y2X7;Q9Y2X7-3;Q9Y2X7-2	Q9Y2X7;Q9Y2X7-3		0.0583002	0.00708085	-0.0490687	-0.129211	-0.0443282	0.306613	0.00268716	0.00197262	-0.123539	0.0141057	-0.225358	0.159319	0.0189777	-0.0386232	0.131385	0.0645165	-0.0425417	-0.17876	0.143034	-0.132932	6	6	6	10.9	10.9	10.9	84.34	0	10.273	85526000	9
GK;GK3P	Glycerol kinase;Putative glycerol kinase 3	P32189-1;P32189-4;P32189-2;P32189;Q14409	P32189-1;P32189-4;P32189-2;P32189;Q14409		-0.0698385	0.137083	-0.112244	-0.05967	-0.0213943	0.0572133	0.186104	-0.274467	0.0295601	-0.111599	0.10406	-0.0281135	-0.0126319	0.0370165	0.137554	-0.209299	0.00559202	-0.0737152	-0.0262701	0.24869	5	5	3	10.9	10.9	7.1	57.488	0	14.442	142320000	10
GLA	Alpha-galactosidase A	P06280	P06280		-0.0263355	0.123808	0.000807092	-0.053867	-0.0205215	-0.169109	0.0339177	0.00947857	-0.0618532	0.0551462	-0.00590038	0.0304392	0.13045	0.0591152	0.0252503	0.0458079	-0.127311	0.0138962	-0.0560878	-0.0635006	5	5	5	12.8	12.8	12.8	48.766	0	9.0958	166470000	14
GLB1	Beta-galactosidase	P16278-3;P16278;P16278-2	P16278-3;P16278;P16278-2		0.30345	-0.341648	-0.062294	-0.196671	-0.0437183	0.312298	-0.380831	0.485265	0.203675	-0.114128	0.382031	-1.10274	-7.53254e-06	-0.361572	0.367302	-0.0909025	0.136746	-0.11781	-0.283561	0.848752	3	3	3	5.9	5.9	5.9	72.75	0	3.8444	15070000	6
GLG1	Golgi apparatus protein 1	Q92896;Q92896-3;Q92896-2	Q92896;Q92896-3;Q92896-2		-0.0239235	-0.0227528	0.0391277	-0.039413	-0.00387793	-0.0543282	0.0639786	-0.00411785	-0.0128562	0.0186597	0.0430051	0.05731	0.0464323	-0.0488121	-0.0471668	-0.0383642	0.0402927	0.0384515	-0.0703318	-0.0376826	10	10	10	8.7	8.7	8.7	134.55	0	26.535	270880000	23
GLO1	Lactoylglutathione lyase	Q04760-2;Q04760	Q04760-2;Q04760		-0.192599	-0.0390338	-0.306415	-0.0401764	0.0255678	0.0517262	0.0250377	0.125071	-0.00403655	0.069956	0.103651	0.0479654	0.066801	0.126978	0.102692	0.099097	-0.0582657	-0.0698085	0.0338929	-0.224471	5	5	5	24.3	24.3	24.3	19.043	0	12.793	391800000	14
GLOD4	Glyoxalase domain-containing protein 4	Q9HC38-2;Q9HC38;Q9HC38-3	Q9HC38-2;Q9HC38;Q9HC38-3		-0.00352684	-0.00982529	0.0308539	0.0142849	0.0414984	-0.0232275	0.00735539	0.00396961	-0.049823	-0.00728073	-0.0428825	0.0124599	-0.0265977	0.0601037	-0.0185754	-0.00326777	-0.0335222	0.0294865	-0.0233487	-0.0145042	16	16	16	54	54	54	33.232	0	52.89	1650300000	107
GLRX	Glutaredoxin-1	P35754	P35754		-0.109829	0.376566	-0.141026	0.0201437	-0.00549927	0.186091	0.0496427	0.218994	0.163307	-0.0108414	0.0141266	-0.01619	-0.265042	-0.320443	-0.0736383	0.0404634	-0.186156	0.149132	-0.0351081	-0.111062	3	3	3	37.7	37.7	37.7	11.776	0	9.4871	100120000	7
GLRX3	Glutaredoxin-3	O76003	O76003		0.0553782	-0.0815383	-0.00614329	-0.0112129	0.0301052	-0.0634645	-0.0464427	-0.00457478	0.100276	0.00695801	0.0145521	-0.0192272	0.0240476	-0.012171	0.013378	0.0229188	-0.00885978	-0.073446	-0.0142749	0.017372	13	13	13	38.8	38.8	38.8	37.432	0	50.739	882570000	77
GLRX5	Glutaredoxin-related protein 5, mitochondrial	Q86SX6	Q86SX6		0.431819	1.88793	0.774814	0.219558	0.771288	0.26658	-0.199966	-1.07815	0.120036	0.306075	0.622631	0.152798	-0.190225	-3.36487	-0.869073	0.441315	0.050332	-0.301679	-0.456767	0.359186	3	3	3	26.1	26.1	26.1	16.628	0	15.023	89511000	22
GLS	Glutaminase kidney isoform, mitochondrial	O94925-3;O94925;O94925-2	O94925-3;O94925		0.0929267	0.0656531	0.0499864	0.0372253	0.0194654	-0.0207042	0.0628066	0.0442469	0.0467001	0.0074791	-0.0140722	-0.0719052	-0.0243415	-0.179235	-0.100041	-0.123084	-0.0178773	-0.0127805	0.0329551	0.0482273	9	9	9	20.6	20.6	20.6	65.459	0	40.793	432940000	26
GLUD1;GLUD2	Glutamate dehydrogenase 1, mitochondrial;Glutamate dehydrogenase 2, mitochondrial	P00367;P00367-3;P00367-2;P49448	P00367;P00367-3;P00367-2;P49448		0.0764454	-0.0280595	0.0262049	0.0353431	0.00374145	-0.00506091	-0.0367233	-0.0718112	0.0487192	-0.0253023	0.132974	-0.0577085	-0.0472323	-0.0832373	-0.117471	-0.0206388	0.00652739	0.0307444	-0.0116213	0.0877975	15	15	15	31.9	31.9	31.9	61.397	0	97.429	1280600000	95
GLUL	Glutamine synthetase	P15104	P15104		-0.0603633	0.0444776	-0.0317285	0.0900196	0.0274743	0.000585508	-0.0218656	-0.0610476	0.0430102	0.0609506	0.0104685	0.0940597	0.0208664	-0.167258	-0.118985	0.073494	0.0173418	-0.00979943	0.0283801	-0.09645	6	6	6	15.5	15.5	15.5	42.064	0	12.412	159230000	19
GMDS	GDP-mannose 4,6 dehydratase	O60547-2;O60547	O60547-2;O60547		-0.0717148	0.104472	-0.0744565	-0.036772	-0.000609495	-0.0474206	0.0116794	0.146208	0.0088439	-0.0172956	-0.108644	0.143086	-0.0451832	0.0539981	-0.0369546	0.0347228	-0.0200718	0.0122667	-0.0632714	-0.0492523	8	8	8	26.3	26.3	26.3	39.053	0	19.571	211680000	20
GMFB	Glia maturation factor beta	P60983;O60234	P60983		0.0590204	-0.0138854	0.0732581	-0.0596573	-0.026232	0.0249051	0.103916	0.0440725	-0.00393546	0.0655682	-0.0992723	-0.0297182	-0.00116739	0.0654544	0.088032	-0.037024	-0.0732889	-0.119154	-0.0804147	-0.0368469	4	4	3	30.3	30.3	19	16.713	0	22.448	188390000	22
GMNN	Geminin	O75496	O75496		-0.192519	0.294938	-0.0484225	-0.0575834	0.0294934	0.0500061	0.0840314	0.240352	-0.245644	0.0973382	-0.0814552	0.294534	0.0370094	0.124787	0.151441	-0.205892	-0.196222	-0.0219014	-0.166836	-0.243822	3	3	3	14.4	14.4	14.4	23.565	0	9.8729	210170000	20
GMPPA	Mannose-1-phosphate guanyltransferase alpha	Q96IJ6;Q96IJ6-2	Q96IJ6;Q96IJ6-2		-0.0722018	-0.0494341	-0.167414	0.0997387	-0.108031	0.0747102	-0.022675	0.10901	-0.086507	-0.0180762	0.0113251	0.0973988	0.0411247	0.160315	-0.169768	-0.0653426	0.0886827	-0.0532971	0.0719499	0.00212288	7	7	7	23.3	23.3	23.3	46.291	0	17.222	132240000	16
GMPPB	Mannose-1-phosphate guanyltransferase beta	Q9Y5P6;Q9Y5P6-2	Q9Y5P6;Q9Y5P6-2		0.0481004	-0.173908	0.0380664	-0.00922431	0.00920229	0.13796	-0.0631499	-0.0869587	0.0548962	-0.0532172	0.0288135	0.0147696	0.0186066	-0.173595	0.000912726	0.0897534	0.0195298	0.0897102	-0.0821172	0.0354795	4	4	4	14.7	14.7	14.7	39.834	0	15.582	89624000	14
GMPR2	GMP reductase 2	Q9P2T1;Q9P2T1-2;Q9P2T1-3	Q9P2T1;Q9P2T1-2;Q9P2T1-3		0.0234795	0.0627238	0.0263871	-0.000297546	0.015303	-0.0976301	0.0290565	0.0223728	-0.00245762	-0.0511457	0.00752604	-0.0430761	-0.0192409	0.0748525	-0.121696	0.0544583	-0.0223039	-0.00629515	-0.0263879	0.018002	8	8	6	24.1	24.1	19.3	37.874	0	26.377	278490000	23
GMPS	GMP synthase [glutamine-hydrolyzing]	P49915;P49915-2	P49915;P49915-2		0.0611663	-0.0669859	0.0440083	0.0241301	-0.00463305	0.0174293	0.00396642	0.00768644	0.0355573	-0.00308676	-0.00552386	-0.0366539	-0.0215302	-0.0748796	-0.0654777	-0.01717	0.013097	0.0211511	0.00635099	0.00502837	21	21	21	34.9	34.9	34.9	76.715	0	64.309	949400000	81
GNA11	Guanine nucleotide-binding protein subunit alpha-11	P29992;O95837;Q03113-3;Q03113-2;P19086;Q03113	P29992		0.0288395	-0.127657	-0.00670071	-0.0190097	0.0437458	-0.0293666	0.005945	-0.0507236	-0.0332056	-0.0498846	-0.0477576	-0.0301654	0.00288668	0.164732	0.073088	0.0259176	0.00964835	-0.0324531	-0.00493889	0.0206903	11	11	7	34.8	34.8	25.1	42.123	0	21.892	263170000	27
GNAI3	Guanine nucleotide-binding protein G(k) subunit alpha	P08754;P09471-2	P08754		0.0410043	-0.0384876	-0.031697	0.0332922	0.131331	-0.0570359	0.0598967	-0.134203	0.0745574	-0.0247413	0.0850925	0.00526503	-0.0101494	-0.130259	-0.0763513	-0.0713433	0.0371635	-0.0460976	0.0401542	0.056239	8	8	5	22.9	22.9	13.6	40.532	0	26.96	321790000	30
GNAQ	Guanine nucleotide-binding protein G(q) subunit alpha	P50148	P50148		-0.0456233	-0.072954	-0.395733	0.031831	0.183402	0.246453	-0.0587863	0.135678	-0.0326295	0.142538	-0.149071	0.12728	0.100928	-0.443067	0.207303	-0.0320302	0.0994302	-0.201192	0.166492	-0.0666183	8	4	4	22	12.3	12.3	42.142	0	4.8444	25671000	5
GNAS	Guanine nucleotide-binding protein G(s) subunit alpha isoforms short;Guanine nucleotide-binding protein G(s) subunit alpha isoforms XLas	P63092-3;P63092-2;P63092;P63092-4;Q5JWF2-2;Q5JWF2;P11488;P19087;P09471;A8MTJ3;P38405;P38405-2	P63092-3;P63092-2;P63092;P63092-4;Q5JWF2-2;Q5JWF2		0.0539908	0.000282347	0.010388	-0.043258	0.00155621	-0.0379802	0.00666103	-0.113	0.124876	-0.0215624	0.133715	0.00891885	-0.0459252	-0.204346	-0.0516937	-0.000872232	0.08177	0.0246234	-0.0431976	0.0586835	8	7	7	24.3	21.4	21.4	44.179	0	19.457	241240000	24
GNB1	Guanine nucleotide-binding protein G(I)/G(S)/G(T) subunit beta-1	P62873-2;P62873;P16520-2;P16520	P62873-2;P62873		0.0104136	0.0109654	0.0165792	0.053024	0.00726109	-0.0268318	0.0128361	-0.0393702	0.0167145	0.00608272	-0.0252015	-0.012371	-0.0285007	0.0108556	-0.0359591	-0.041431	-0.044589	0.014914	0.0483046	-0.0100659	9	9	5	32.2	32.2	20.8	36.297	0	31.027	942780000	75
GNB2	Guanine nucleotide-binding protein G(I)/G(S)/G(T) subunit beta-2	P62879;P62879-2	P62879;P62879-2		-0.038921	-0.104903	0.0222055	-0.0402162	0.052038	0.155037	0.090563	-0.0806685	-0.00176966	0.0178024	-0.0388995	0.107784	0.0812997	-0.277877	-0.0671722	0.0296297	0.00292972	0.0916495	-0.0507502	-0.00613046	8	5	3	29.4	20.3	14.4	37.331	0	12.111	117220000	20
GNB2L1	Guanine nucleotide-binding protein subunit beta-2-like 1;Guanine nucleotide-binding protein subunit beta-2-like 1, N-terminally processed	P63244	P63244		0.0551037	-0.154904	0.0458827	0.0728546	0.0431126	-0.011203	0.00248098	-0.117833	0.105638	-0.0166052	0.0742275	-0.0730057	-0.025386	-0.0552817	-0.0457582	0.0111602	0.050148	-0.0133367	-0.0036603	-3.8147e-06	21	21	21	74.8	74.8	74.8	35.076	0	323.31	7576600000	269
GNE	Bifunctional UDP-N-acetylglucosamine 2-epimerase/N-acetylmannosamine kinase;UDP-N-acetylglucosamine 2-epimerase (hydrolyzing);N-acetylmannosamine kinase	Q9Y223-4;Q9Y223-3;Q9Y223;Q9Y223-2;Q9Y223-5	Q9Y223-4;Q9Y223-3;Q9Y223;Q9Y223-2;Q9Y223-5		-0.00737843	-0.140622	0.625816	-0.332125	0.0678077	-0.1541	0.454878	1.06614	0.159659	0.0784225	0.412203	-0.682894	-0.0202192	0.40968	-1.90455	-0.710517	-0.094249	-0.321714	0.485026	0.552373	2	2	2	3.5	3.5	3.5	71.277	0	4.6975	15717000	3
GNG12	Guanine nucleotide-binding protein G(I)/G(S)/G(O) subunit gamma-12	Q9UBI6	Q9UBI6		-0.0384094	0.00869888	0.0218002	-0.0532052	-0.038472	0.187438	-0.358602	0.0760173	0.0698822	-0.103194	0.048479	0.15092	-0.110733	0.0796617	0.115143	-0.0728674	0.0553097	-0.132897	0.034289	0.00437236	4	4	4	50	50	50	8.0061	0	13.934	206290000	17
GNG5	Guanine nucleotide-binding protein G(I)/G(S)/G(O) subunit gamma-5	P63218	P63218		-0.00640324	-0.0237918	-0.0223958	0.0970177	0.0197488	-0.0387171	-0.00119945	-0.000841141	-0.00274205	-0.0499454	0.0624647	-0.0624058	0.00675507	0.0797704	-0.0241338	-0.0309762	0.00767073	-0.0150597	-0.00526361	-0.0459215	3	3	3	38.2	38.2	38.2	7.3184	0	8.0308	463030000	24
GNL1	Guanine nucleotide-binding protein-like 1	P36915;P36915-2	P36915;P36915-2		0.0607515	-0.108062	-0.00738068	0.0679149	0.027563	0.0172414	-0.00478861	-0.13709	0.0752902	0.0248282	0.0929961	0.0368188	0.0455189	-0.190899	-0.210634	0.00621757	0.0160238	0.00902896	0.110693	0.0115979	16	16	16	31.3	31.3	31.3	68.66	0	46.926	314950000	49
GNL3	Guanine nucleotide-binding protein-like 3	Q9BVP2-2;Q9BVP2	Q9BVP2-2;Q9BVP2		-0.0594816	-0.036917	0.0771772	-0.138312	-0.00453625	0.0770878	0.0142815	-0.234055	0.0746841	-0.0218842	0.000289857	-0.0742829	-0.0429111	-0.00856918	0.118278	0.152126	0.0260121	-0.0261993	-0.00943889	0.0602806	4	4	4	7.4	7.4	7.4	60.54	0	10.622	105020000	9
GNPDA1	Glucosamine-6-phosphate isomerase 1	P46926-2;P46926;Q8TDQ7-3;Q8TDQ7-2;Q8TDQ7	P46926-2;P46926		0.283303	-0.252992	-0.0469204	-0.0384917	-0.0272546	0.0483766	-0.0903831	-0.16403	0.151056	-0.12776	0.0676643	-0.0387507	0.120734	-0.59783	0.141909	-0.0944326	0.171808	0.207844	0.149882	0.0798987	4	4	4	20.8	20.8	20.8	24.047	0	8.3177	87055000	11
GNPNAT1	Glucosamine 6-phosphate N-acetyltransferase	Q96EK6	Q96EK6		-0.0608512	-0.0678936	-0.10386	0.0588738	-0.0653284	0.030616	-0.0293937	-0.0660771	-0.0304444	-0.0433678	0.00644416	-0.0110559	0.120526	0.0994008	-0.0863304	0.0231126	0.00555655	-0.0109283	0.0614471	0.113185	4	4	4	20.7	20.7	20.7	20.749	0	17.472	75613000	10
GNS	N-acetylglucosamine-6-sulfatase	P15586-2;P15586	P15586-2;P15586		-0.212862	0.289602	-0.205173	-0.190298	-0.264526	0.0771072	0.0398887	0.251945	-0.0873859	0.113174	-0.0510082	0.157779	-0.0370142	0.040653	0.14578	-0.120014	0.0360756	0.0224613	-0.0268558	-0.0356991	5	5	5	13.2	13.2	13.2	59.988	0	12.999	129380000	22
GOLGA2	Golgin subfamily A member 2	Q08379	Q08379		0.0333861	-0.10015	-0.227941	0.253396	0.145949	0.0397704	-0.199524	-0.404203	-0.0298989	0.156697	0.199994	0.19669	-0.145317	-0.0485217	-0.11458	0.52177	-0.0149541	-0.0596754	-0.259824	0.0005669	2	2	2	2.2	2.2	2.2	113.08	0.0025042	2.4048	32478000	3
GOLGA3	Golgin subfamily A member 3	Q08378-2;Q08378;Q08378-4	Q08378-2;Q08378;Q08378-4		-0.339571	0.272865	0.0999413	-0.280768	-9.23201e-05	0.292217	-0.203179	0.139293	-0.462436	0.0725494	-0.0506365	0.138419	0.00157766	0.175121	-0.181057	0.11299	0.0527749	-0.08772	0.106228	0.0851151	7	7	7	7.6	7.6	7.6	155.68	0	15.964	331970000	14
GOLGB1	Golgin subfamily B member 1	Q14789-4;Q14789-3;Q14789;Q14789-2;REV__Q8N884-2;REV__Q8N884	Q14789-4;Q14789-3;Q14789;Q14789-2		-0.0122249	-0.0222006	0.135629	0.187732	0.00247059	0.0894581	-0.0377331	0.0232694	-0.0318096	0.0221806	-0.0951007	-0.0732036	-0.0909579	0.0284851	-0.0985445	-0.0206797	-0.0250131	0.0168974	-0.0581413	0.00311804	9	9	8	3.5	3.5	3.3	367.42	0	15.162	155360000	14
GOLIM4	Golgi integral membrane protein 4	O00461	O00461		0.076869	-0.0913442	0.0201507	-0.214568	-0.101444	0.0644125	0.055758	0.212993	-0.0373974	-0.0120441	-0.163619	0.0886936	0.20236	-0.0421538	0.053341	-0.0417592	-0.136412	0.0544396	0.0216502	-0.0662956	6	6	6	10.2	10.2	10.2	81.879	0	28.429	106810000	15
GOLM1	Golgi membrane protein 1	Q8NBJ4-2;Q8NBJ4	Q8NBJ4-2;Q8NBJ4		-0.00326821	-0.032039	-0.0328955	0.182812	-0.0228601	0.118117	-0.0702528	0.266551	0.0199471	0.0111931	0.0471566	0.0266543	0.0771756	-0.185129	-0.277521	-0.368023	-0.0237192	0.0178681	0.0910206	0.100842	4	4	4	13.6	13.6	13.6	44.272	0	8.7966	68091000	10
GOPC	Golgi-associated PDZ and coiled-coil motif-containing protein	Q9HD26-2;Q9HD26;Q9HD26-3	Q9HD26-2;Q9HD26;Q9HD26-3		0.0282476	0.251896	0.00670022	-6.79046e-05	-0.175893	0.0222112	-0.128393	0.27573	-0.102589	-0.0183473	-0.0054546	-0.0266646	-0.130343	0.16101	-0.111677	-0.0096097	-0.0749995	0.0160921	-0.00166693	-0.0325515	2	2	2	5.9	5.9	5.9	49.721	0	6.4912	43896000	5
GORASP2	Golgi reassembly-stacking protein 2	Q9H8Y8-2;Q9H8Y8;Q9H8Y8-3	Q9H8Y8-2;Q9H8Y8;Q9H8Y8-3		-0.0193058	-0.134252	0.00907201	-0.0562851	0.0952261	0.00534043	0.140313	0.0832409	0.0118631	0.139421	0.00808567	-0.140873	-0.0297366	-0.157376	-0.0518672	0.109931	0.082305	-0.0161996	-0.218135	0.0828621	5	5	5	26.3	26.3	26.3	39.768	0	43.601	174880000	21
GOT1	Aspartate aminotransferase, cytoplasmic	P17174;P17174-2	P17174;P17174-2		0.0664501	-0.0680211	0.04319	-0.0065421	0.0399631	-0.0385166	-0.0242519	-0.0832799	0.0297766	-0.0502092	0.0487077	-0.0431857	0.0216184	-0.0497012	-0.000965536	0.0214146	-0.00265536	0.0285807	-0.0262257	0.0374837	17	17	17	49.6	49.6	49.6	46.247	0	84.741	1132800000	83
GOT2	Aspartate aminotransferase, mitochondrial	P00505;P00505-2	P00505;P00505-2		0.0240689	-0.0736249	0.0152383	0.0227705	0.0340122	0.000568818	0.040379	-0.0805586	-0.0105734	-0.0499022	-0.0445936	-0.017518	0.00297022	0.00288445	0.0164967	0.0283635	0.0177933	0.0290881	0.00246324	-0.016696	19	19	19	47.4	47.4	47.4	47.517	0	112.25	4242100000	187
GPATCH1	G patch domain-containing protein 1	Q9BRR8	Q9BRR8		-0.408187	0.170283	-0.526157	-0.0777764	-0.209051	-0.106564	0.0197748	0.0953885	-0.147536	0.0883121	0.385898	0.462155	0.0418689	0.557517	0.19003	-0.606051	0.0082787	-0.017637	0.097451	-0.0743676	2	2	2	1.9	1.9	1.9	103.34	0.0003003	3.2188	22066000	3
GPD2	Glycerol-3-phosphate dehydrogenase, mitochondrial	P43304;P43304-2	P43304;P43304-2		0.0621921	-0.210517	0.0128318	0.0281584	-0.0395045	-0.0516114	-0.0538825	-0.0470096	0.194132	0.0180873	0.159227	0.0225388	0.0204912	-0.0453742	-0.240086	-0.108662	0.0671909	-0.0378006	0.0269876	0.166241	14	14	14	21.2	21.2	21.2	80.852	0	28.368	261020000	30
GPHN	Gephyrin;Molybdopterin adenylyltransferase;Molybdopterin molybdenumtransferase	Q9NQX3;Q9NQX3-2	Q9NQX3;Q9NQX3-2		-0.165602	0.19538	-0.218557	0.010786	-0.0786262	0.00551658	0.029392	-0.0875535	-0.21263	-0.0748511	-0.0721793	0.082578	-0.0431856	0.314027	-0.0188471	-0.0797152	0.0481966	-0.0109404	0.130883	0.189557	7	7	7	10.9	10.9	10.9	79.748	0	18.414	141270000	16
GPI	Glucose-6-phosphate isomerase	P06744;P06744-2;CON__Q3ZBD7;Q8N196	P06744;P06744-2		0.0376875	-0.126191	0.0467351	0.0345434	0.0193583	0.0396506	-0.0300052	-0.0975962	0.0478318	-0.0505714	0.0320196	-0.114702	0.0193564	-0.0144626	-0.0214187	0.0243188	0.0168074	-0.012181	0.0196034	0.0728472	24	24	24	42.5	42.5	42.5	63.146	0	247.65	13105000000	270
GPKOW	G patch domain and KOW motifs-containing protein	Q92917	Q92917		0.0403574	-0.0803257	0.0376142	-0.137805	-0.0286253	0.0537455	0.0460352	0.0241681	0.00648284	-0.098245	-0.162804	0.148122	0.0311463	-0.00950974	0.0360336	0.00543518	-0.00469449	0.0669535	0.063382	-0.0938359	9	9	9	26.3	26.3	26.3	52.228	0	26.208	290730000	27
GPN1	GPN-loop GTPase 1	Q9HCN4;Q9HCN4-3;Q9HCN4-2;Q9HCN4-4;Q9HCN4-5	Q9HCN4;Q9HCN4-3;Q9HCN4-2;Q9HCN4-4;Q9HCN4-5		0.00576785	0.0336511	0.13883	-0.325392	-0.100936	-0.0115781	-0.110436	-0.0144995	0.00924873	-0.0354645	-0.101494	0.190788	0.0383058	-0.0939717	-0.299539	0.0721418	0.131064	0.00119787	0.1684	0.247546	3	3	3	9.4	9.4	9.4	41.74	0	24.155	82453000	7
GPRASP2	G-protein coupled receptor-associated sorting protein 2	Q96D09	Q96D09		-0.225422	0.295883	-0.244282	-0.0615228	0.0126575	-0.0305067	0.367924	0.507159	-0.395431	-0.0385344	-1.19207	0.561533	-0.021461	0.36444	0.523663	0.0369638	-0.115747	0.131407	0.0120687	-0.545089	3	3	3	3.5	3.5	3.5	93.772	0.00030684	3.4336	54713000	4
GPRIN1	G protein-regulated inducer of neurite outgrowth 1	Q7Z2K8;Q7Z2K8-2	Q7Z2K8;Q7Z2K8-2		-0.171755	-0.565781	-0.156216	0.134999	0.119477	0.0342147	-0.411846	0.362255	0.397125	0.155338	0.515316	0.396003	0.132138	0.244891	-0.879151	-0.206982	-0.334434	-0.0339285	-0.53831	0.750275	2	2	2	2.7	2.7	2.7	102.4	0	3.8934	9632600	3
GPS1	COP9 signalosome complex subunit 1	Q13098-5;Q13098;Q13098-7;Q13098-6	Q13098-5;Q13098;Q13098-7;Q13098-6		-0.0427762	-0.0170187	-0.0369168	0.000225067	-0.0295426	0.0755123	0.00873271	0.0459639	-0.0496913	-0.0332053	-0.0485395	0.00585118	-0.0202843	0.0720744	-0.0111547	0.0666854	-0.00288627	0.0251035	-0.0106895	-0.0538126	13	13	13	26.3	26.3	26.3	55.092	0	88.998	968760000	65
GRAMD1A	GRAM domain-containing protein 1A	Q96CP6-2;Q96CP6-3;Q96CP6	Q96CP6-2;Q96CP6-3;Q96CP6		-0.101931	0.0711676	-0.135089	0.167384	0.0436357	-0.0321022	-0.0669077	0.130384	-0.117354	0.0946033	0.0752878	0.193067	-0.129933	0.342739	-0.585505	-0.0144176	-0.103222	-0.0903177	0.113629	0.0885112	5	5	5	10.1	10.1	10.1	79.366	0	7.8162	222550000	8
GRB2	Growth factor receptor-bound protein 2	P62993;P62993-2	P62993;P62993-2		-0.130059	0.39613	-0.066698	0.000900462	-0.0380423	-0.0357095	0.101784	0.229235	-0.284925	3.35686e-05	-0.223387	0.213498	-0.0123349	0.359056	0.154861	-0.0876781	-0.197322	-0.0795417	-0.141401	-0.214769	14	14	14	61.3	61.3	61.3	25.206	0	55.4	2139800000	90
GRHPR	Glyoxylate reductase/hydroxypyruvate reductase	Q9UBQ7;Q9UBQ7-2	Q9UBQ7		0.00330481	-0.114317	0.0188481	-0.0338709	-0.0843909	-0.0271599	-0.00108558	-0.00284725	-0.0118024	0.0238152	-0.086412	-0.0585792	0.0311497	0.198948	-0.0414645	0.0460954	-0.0170985	-0.0251633	0.050974	0.0746872	6	6	6	21.3	21.3	21.3	35.668	0	21.974	194920000	25
GRIPAP1	GRIP1-associated protein 1	Q4V328-4;Q4V328;Q4V328-2;Q4V328-3	Q4V328-4;Q4V328;Q4V328-2;Q4V328-3		-0.06949	0.178371	-0.40618	0.114064	-0.0940325	0.101965	0.237769	0.536636	-0.124983	0.1276	0.223921	0.0863071	0.0761346	-0.348363	-0.408661	0.774879	-0.0746298	0.204714	-0.691935	-0.500456	4	4	4	4.6	4.6	4.6	92.753	0	6.6552	45133000	6
GRN	Granulins;Acrogranin;Paragranulin;Granulin-1;Granulin-2;Granulin-3;Granulin-4;Granulin-5;Granulin-6;Granulin-7	P28799;P28799-3;P28799-2	P28799;P28799-3		-0.228345	-0.0132239	-0.0837038	-0.0333678	0.0209497	0.00459142	0.166009	0.231384	-0.29679	0.11374	-0.413565	0.234824	-0.107439	0.316051	0.0781191	-0.0482283	0.0546633	0.113088	0.016892	-0.182019	7	7	7	13.3	13.3	13.3	63.544	0	18.113	192030000	15
GRPEL1	GrpE protein homolog 1, mitochondrial	Q9HAV7	Q9HAV7		-0.0762545	0.139483	-0.0919564	0.00458889	0.0360525	-0.0102722	0.0474908	0.0701527	-0.15628	-0.0132673	-0.0348945	0.0531446	0.0457934	0.119265	0.101991	0.0221028	-0.0926351	-0.0145984	-0.0651797	-0.141095	6	6	6	30	30	30	24.279	0	22.392	368110000	27
GRSF1	G-rich sequence factor 1	Q12849-5;Q12849	Q12849-5;Q12849		-0.189015	0.180447	-0.0844971	-0.0343328	-0.0535646	0.000418138	0.0704035	0.188764	-0.245977	0.100628	-0.260118	0.189552	0.02949	0.28754	0.184232	-0.0362509	-0.142682	0.0100022	-0.0556299	-0.195777	5	5	5	13.5	13.5	13.5	36.613	0	21.354	291750000	14
GRWD1	Glutamate-rich WD repeat-containing protein 1	Q9BQ67	Q9BQ67		0.0503055	0.00173646	-0.0412479	0.0291142	0.0182977	0.00376754	-0.00459155	-0.0167598	0.0733749	-0.0246631	0.137212	-0.0552684	0.0667206	0.0718572	-0.106049	0.0856421	-0.198399	-0.0857123	-0.125714	0.0640067	8	8	8	19.5	19.5	19.5	49.419	0	23.914	265400000	32
GSK3A	Glycogen synthase kinase-3 alpha	P49840	P49840		0.0370149	0.100285	0.0789682	0.0373557	0.0141919	0.016559	-0.00764829	-0.203792	0.00813091	-0.10353	0.00297159	0.0344607	0.0368542	-0.084169	-0.0853502	0.0766792	-0.0842738	0.0362224	-0.0564951	0.089195	9	9	7	31.7	31.7	28.2	50.98	0	18.382	197090000	25
GSK3B	Glycogen synthase kinase-3 beta	P49841;P49841-2	P49841;P49841-2		0.120137	-0.257101	-0.12263	-0.177932	0.188527	-0.0120594	-0.178397	-0.349334	-0.0695359	0.00241871	0.235399	0.209695	-0.010522	0.0756778	0.337119	0.160824	0.085186	-0.145443	-0.186011	0.0376121	5	3	3	14.8	10.7	10.7	46.744	0	5.4736	24423000	3
GSPT1	Eukaryotic peptide chain release factor GTP-binding subunit ERF3A	P15170-2;P15170-3;P15170;Q8IYD1	P15170-2;P15170-3;P15170		0.029114	-0.000483572	0.0282887	0.0336828	0.0323835	-0.0293497	0.00190058	-0.0185579	-0.0212333	-0.0372791	-0.0452684	0.0139689	-0.0304902	0.0427406	-0.000209332	0.00694055	-0.0212575	0.0131409	-0.0244853	-0.0299154	17	17	17	23	23	23	68.6	0	45.028	2450500000	77
GSR	Glutathione reductase, mitochondrial	P00390-5;P00390-4;P00390-2;P00390-3;P00390	P00390-5;P00390-4;P00390-2;P00390-3;P00390		-0.00127342	-0.0438104	-0.0154011	-0.010584	-0.000903986	-0.0071095	0.051029	-0.111804	0.135753	-0.0310864	0.215635	-0.095927	-0.0571354	-0.0475251	-0.0674464	0.00508461	0.0511001	-0.0207236	0.00804444	-0.0122849	9	9	9	22.3	22.3	22.3	47.267	0	22.96	382100000	28
GSS	Glutathione synthetase	P48637;P48637-2	P48637;P48637-2		-0.0575793	0.0656151	-0.0373407	-0.00776911	-0.0587987	-0.0672015	0.00223389	-0.0174874	-0.0271294	-0.0367789	0.0358011	-0.0166303	-0.0253647	0.212227	0.042717	-0.0322788	-0.0226733	-0.00503086	-0.0316317	0.0287313	15	15	15	36.9	36.9	36.9	52.384	0	31.895	505830000	43
GSTM3	Glutathione S-transferase Mu 3	P21266;P28161-2;P46439;P28161	P21266		0.0095118	-0.00260693	0.0306748	-0.0141106	-0.00390606	-0.00343585	-0.0146485	-0.0721678	-0.0791218	0.0197826	-0.0467132	0.0216946	-0.0380218	0.112539	0.0157895	-0.010216	-0.0332513	-0.00420394	-0.00699969	0.063042	9	9	9	35.1	35.1	35.1	26.559	0	56.171	580180000	39
GSTO1	Glutathione S-transferase omega-1	P78417;P78417-3;P78417-2	P78417;P78417-3;P78417-2		0.0831256	-0.0329245	0.0846497	0.0104216	0.0392188	0.00486178	-0.0102199	-0.0902811	0.0411344	-0.0262343	0.0125613	-0.0323675	0.0111618	-0.129926	-0.0404498	0.0243134	-0.0209626	0.0078302	-0.0188006	0.0265181	14	14	14	48.1	48.1	48.1	27.566	0	75.722	2728500000	110
GSTP1	Glutathione S-transferase P	P09211	P09211		0.0461151	-0.022852	0.0370433	0.0120934	-0.0149044	0.00317731	-0.024009	-0.0390354	0.0648997	-0.0135469	0.00615925	-0.0344532	-0.00771932	-0.0836603	-0.0306146	0.0294261	-0.0015308	0.0073073	-0.0421399	0.0518754	8	8	8	37.1	37.1	37.1	23.356	0	61.597	1717300000	105
GSTT2B;GSTT2	Glutathione S-transferase theta-2B;Glutathione S-transferase theta-2	P0CG30;P0CG29;P30711	P0CG30;P0CG29		0.0261498	-0.269679	0.0296786	0.0462879	0.0345701	0.124198	0.12248	-0.0637522	0.026082	-0.232394	-0.0873022	0.0399807	-0.00311327	0.0544553	-0.209449	-0.0818356	-0.0459407	0.262958	0.0267474	0.14351	3	3	3	14.8	14.8	14.8	27.507	0.0016802	2.4856	12859000	4
GSTZ1	Maleylacetoacetate isomerase	O43708-2;O43708;O43708-3	O43708-2;O43708;O43708-3		-0.0402572	-0.252685	0.283635	0.367538	-0.0785564	0.203121	-0.978471	0.0763973	0.0711672	-0.0840445	0.148602	0.134872	0.0261466	0.0648592	-0.203139	0.0981631	0.000127643	0.0674069	0.0490046	-0.0102566	2	2	2	13	13	13	17.896	0.00030826	3.4813	26726000	2
GTF2A1;GTF2A1L	Transcription initiation factor IIA subunit 1;Transcription initiation factor IIA alpha chain;Transcription initiation factor IIA beta chain;TFIIA-alpha and beta-like factor	P52655;Q9Y6Q2-3;P52655-2;Q9UNN4-2;Q9UNN4	P52655;Q9Y6Q2-3;P52655-2;Q9UNN4-2;Q9UNN4		-0.211678	0.643084	-0.194503	-0.323477	-0.181782	0.147135	0.0270849	0.472027	-0.159112	-0.0434172	-0.674887	0.651527	-0.369118	0.318731	0.269097	0.0601524	-0.16274	-0.00381751	0.107394	-0.428069	2	2	2	4.8	4.8	4.8	41.513	0.00030331	3.3319	50984000	3
GTF2A2	Transcription initiation factor IIA subunit 2	P52657;REV__Q6UB99	P52657;REV__Q6UB99		-0.0866311	0.184767	-0.067684	-0.158039	0.104393	0.0417816	-0.297903	0.0613717	-0.0550759	-0.0389276	-0.0258093	0.134345	-0.0836075	0.0154622	0.0821636	0.0578461	-0.0756766	-0.0291998	0.138599	0.041455	2	2	2	14.7	14.7	14.7	12.457	0.0027594	2.3393	74818000	3
GTF2B	Transcription initiation factor IIB	Q00403	Q00403		0.067241	-0.196631	0.107112	0.187219	-0.0529559	-0.00840497	-0.0167005	-0.115942	0.133262	-0.127411	0.065711	-0.0851233	-0.0305426	0.00351506	-0.317928	0.0499803	0.135367	0.0538457	-0.015322	0.107339	3	3	3	12.3	12.3	12.3	34.833	0	9.9991	63747000	7
GTF2F1	General transcription factor IIF subunit 1	P35269	P35269		-0.117993	0.13546	-0.156777	-0.164165	-0.0815361	0.100265	0.0144993	0.106984	-0.141603	0.101791	-0.0951421	0.279229	-0.00177355	0.228133	0.135447	-0.118887	-0.155692	-0.0897666	-0.0680914	0.0332471	8	8	8	21.3	21.3	21.3	58.24	0	37.28	224880000	21
GTF2F2	General transcription factor IIF subunit 2	P13984	P13984		0.0175025	0.141686	0.0400337	-0.0317245	-0.0108175	0.0200196	0.0584616	-0.0457419	-0.0255321	-0.000833128	-0.0108126	0.0315265	-0.0871591	-0.0452717	0.02075	-0.051442	-0.0454404	0.0131318	-0.0733282	0.0286226	9	9	9	34.1	34.1	34.1	28.38	0	19.166	424020000	16
GTF2I	General transcription factor II-I	P78347-2;P78347-4;P78347-3;P78347;P78347-5;Q86UP8-3;Q86UP8;Q6EKJ0	P78347-2;P78347-4;P78347-3;P78347		0.0591391	-0.0870872	0.0172021	0.0112112	0.00117893	-0.0371149	-0.00377876	-0.109345	0.0534656	-0.0355782	0.044454	-0.00962812	-0.0221955	-0.0406834	-0.00269383	0.000338078	0.0438018	0.0423592	0.00164042	0.0169451	30	30	29	36.9	36.9	34.9	107.97	0	85.408	1211100000	100
GTF3C1	General transcription factor 3C polypeptide 1	Q12789-3;Q12789	Q12789-3;Q12789		0.116079	-0.0406743	0.0410143	-0.119226	-0.0927489	0.130651	-0.00692216	-0.041474	0.0721753	-0.202157	0.119787	-0.140778	-0.0635197	0.035138	0.0216047	0.0229744	0.0475969	-0.0252549	0.0432463	0.0261194	6	6	6	3.5	3.5	3.5	236.28	0	25.577	111070000	12
GTF3C3	General transcription factor 3C polypeptide 3	Q9Y5Q9-2;Q9Y5Q9	Q9Y5Q9-2;Q9Y5Q9		0.105154	-0.954663	-0.292031	0.299999	0.124122	-0.10141	0.495433	-0.904302	0.191424	-0.0338968	0.415925	-0.0181672	0.33084	0.234628	-0.0281263	0.404638	0.143257	-0.0621702	0.12525	-0.532273	2	2	2	4.1	4.1	4.1	47.258	0	6.1922	33962000	3
GTF3C4	General transcription factor 3C polypeptide 4	Q9UKN8	Q9UKN8		0.198279	0.000975311	-0.148543	-0.142414	0.0298494	-0.0893226	0.36691	0.0642852	0.0264273	-0.00953407	0.0675506	-0.449405	-0.03655	-0.239579	0.136952	-0.0379791	0.122146	-0.0254068	0.0416161	0.0673721	8	8	8	13	13	13	91.981	0	14.902	108740000	12
GTF3C5	General transcription factor 3C polypeptide 5	Q9Y5Q8-2;Q9Y5Q8;Q9Y5Q8-3	Q9Y5Q8-2;Q9Y5Q8;Q9Y5Q8-3		-0.0604112	0.0591592	0.0660458	-0.20076	-0.0351604	0.185872	0.000145912	0.0224826	-0.00570464	-0.200199	0.128471	0.01331	-0.0710004	0.129951	-0.132109	0.0800617	0.0110234	-0.0362441	0.00982705	-0.0211301	6	6	6	15.9	15.9	15.9	58.266	0	13.395	130360000	15
GTPBP1	GTP-binding protein 1	O00178	O00178		0.035643	-0.14107	-0.029067	0.207725	0.025544	-0.105935	-0.0858029	-0.0832369	0.0617031	0.0970642	0.0824926	-0.139336	0.0282458	-0.0941802	-0.109731	0.138975	0.118796	-0.0485254	-0.0542903	0.0386168	5	5	5	9.9	9.9	9.9	72.453	0	9.9065	93745000	8
GTPBP4	Nucleolar GTP-binding protein 1	Q9BZE4;Q9BZE4-2;Q9BZE4-3	Q9BZE4;Q9BZE4-2;Q9BZE4-3		0.035777	-0.0547385	-0.151316	0.0901103	0.00833731	-0.153613	0.0589708	-0.258982	0.109459	0.151197	0.0352584	-0.215631	0.0240006	-0.103465	0.143928	0.117458	-0.00465724	-0.0350123	0.0478905	0.0986584	9	9	9	12.8	12.8	12.8	73.964	0	12.488	93762000	14
GTSE1	G2 and S phase-expressed protein 1	Q9NYZ3	Q9NYZ3		-0.313083	0.26062	0.238752	-0.850692	-0.224528	0.205567	0.168968	-0.228319	-0.12401	-0.02296	0.128711	0.0936036	-0.123325	0.000658453	-0.034841	0.09214	0.147204	0.171143	0.2246	0.13342	4	4	4	7.1	7.1	7.1	76.644	0	6.6098	67929000	5
GYG1	Glycogenin-1	P46976-2;P46976;P46976-3	P46976-2;P46976;P46976-3		0.101151	-0.0517315	-0.00923282	-0.0448448	-0.0177009	-0.300685	0.0233809	-0.129489	-0.0673505	-0.060035	-0.0513454	-0.0446518	-0.0382601	0.0416636	0.00315601	0.030869	0.0573249	0.312908	0.120424	0.0680792	4	4	3	14.1	14.1	9.3	37.478	0	4.6615	47272000	5
H1FX	Histone H1x	Q92522	Q92522		-0.355619	0.320522	-0.299441	-0.0997066	-0.000907041	-0.112317	0.130312	0.255008	-0.42927	0.0801719	-0.345858	0.269957	0.128127	0.530554	0.338962	0.0108077	-0.213997	0.0300212	-0.0572564	-0.23644	12	12	11	54	54	45.5	22.487	0	51.082	2269900000	77
H2AFV;H2AFZ;HIST3H2A;HIST1H2AB	Histone H2A.V;Histone H2A.Z;Histone H2A type 3;Histone H2A type 1-B/E	Q71UI9;P0C0S5;Q71UI9-3;Q71UI9-4;Q71UI9-2;Q7L7L0;P04908;Q71UI9-5	Q71UI9;P0C0S5;Q71UI9-3;Q71UI9-4;Q71UI9-2;Q7L7L0;P04908		0.220892	0.0169849	0.100608	0.222479	0.0768839	-0.106228	-0.00575551	-0.245039	0.402113	-0.128991	0.297763	0.0588211	-0.0942777	-0.26601	-0.205141	-0.196335	0.0380715	-0.182153	0.0182431	-0.0792986	4	4	2	31.2	31.2	18.8	13.509	0	16.021	1373100000	29
H3F3A	Histone H3.3	P84243;Q6NXT2	P84243		-0.00328615	0.173366	0.100988	0.267167	0.0100418	-0.180129	-0.0103287	-0.12863	0.13504	-0.00727367	0.131203	0.111882	-0.0941413	0.0354727	-0.133354	-0.182092	0.0500506	-0.141855	0.0401134	-0.230603	5	5	2	22.8	22.8	7.4	15.328	0	7.6172	1047500000	15
HACD2	Very-long-chain (3R)-3-hydroxyacyl-CoA dehydratase 2	Q6Y1H2	Q6Y1H2		-0.125561	0.367936	-0.099243	0.00248174	0.116757	0.342789	0.0545847	0.103325	-0.256383	-0.0746114	-0.229302	0.211323	0.0884819	-0.438837	0.137097	0.0151033	-0.0548963	0.0116096	0.0690847	-0.298109	2	2	2	7.5	7.5	7.5	28.368	0.00030807	3.4757	49698000	4
HACD3	Very-long-chain (3R)-3-hydroxyacyl-CoA dehydratase 3	Q9P035;Q9P035-2	Q9P035;Q9P035-2		0.0547007	-0.0708042	0.0811019	0.0742022	-0.011442	-0.0162914	0.00606489	-0.0550774	0.152861	0.0156361	0.0683081	-0.188102	-0.101934	-0.210176	-0.0837345	-0.000268653	0.107995	0.0567397	-0.0120917	0.075942	7	7	7	22.9	22.9	22.9	43.159	0	50.87	485130000	38
HACL1	2-hydroxyacyl-CoA lyase 1	Q9UJ83-3;Q9UJ83-4;Q9UJ83-2;Q9UJ83	Q9UJ83-3;Q9UJ83-4;Q9UJ83-2;Q9UJ83		0.0296338	-0.164005	-0.248577	-0.204309	0.191008	-0.0593312	-0.0960208	-0.141261	0.0338576	0.0499993	0.0715929	0.0961794	0.090657	-0.219079	0.139918	0.308559	0.123708	-0.0991627	0.0214875	0.0187773	2	2	2	5.4	5.4	5.4	54.724	0	6.8557	52184000	9
HADH	Hydroxyacyl-coenzyme A dehydrogenase, mitochondrial	Q16836;Q16836-3;Q16836-2	Q16836;Q16836-3;Q16836-2		0.0985009	-0.0252215	0.0974712	-0.0661658	-0.0311089	0.00703149	0.0792246	-0.164329	-0.0366014	0.000995066	-0.0737975	-0.0348163	0.018508	0.0118868	-0.0768551	0.108008	-0.0324523	-0.0342525	0.0943779	0.00322676	5	5	5	15	15	15	34.293	0	8.723	324830000	19
HADHA	Trifunctional enzyme subunit alpha, mitochondrial;Long-chain enoyl-CoA hydratase;Long chain 3-hydroxyacyl-CoA dehydrogenase	P40939;P40939-2	P40939		0.0204222	0.0194311	0.00972661	0.0542786	0.0112692	-0.0159219	0.0196773	-0.0706074	0.00945783	-0.0315075	0.0101441	-0.0455936	-0.0213922	0.0297611	-0.0187467	0.0402984	-0.0172407	-0.0269935	0.00975561	-0.0425876	21	21	21	28.2	28.2	28.2	82.999	0	158.98	2590400000	133
HADHB	Trifunctional enzyme subunit beta, mitochondrial;3-ketoacyl-CoA thiolase	P55084;P55084-2	P55084;P55084-2		0.0224885	0.0406376	0.0136032	0.11088	-0.021857	-0.0598341	-0.0550051	-0.0451539	-0.0291845	0.0416762	-0.0432189	-0.0251126	-0.00114498	-0.0355907	-0.000576437	0.0213459	0.00497869	0.0151157	0.00973931	-0.0201564	14	14	14	30.2	30.2	30.2	51.294	0	40.052	1096400000	65
HAGH	Hydroxyacylglutathione hydrolase, mitochondrial	Q16775-2;Q16775;Q16775-3	Q16775-2;Q16775		-0.00331017	-0.115331	0.080833	-0.0270113	0.0301079	-0.00577025	0.00277567	-0.0299032	0.081893	-0.0303261	0.0259745	-0.0907603	-0.0613799	-0.150182	-0.0818614	-0.0549819	0.0849883	0.146596	0.040163	0.101117	6	6	6	25.4	25.4	25.4	28.86	0	16.493	335180000	17
HARS	Histidine--tRNA ligase, cytoplasmic	P12081;P12081-4;P12081-2;P12081-3	P12081;P12081-4;P12081-2;P12081-3		0.0857708	-0.0991002	0.0671679	0.0145996	0.0385204	-0.00200687	-0.00509197	-0.0837913	0.0961096	-0.0141478	0.0427021	-0.0423191	-0.0139163	-0.18104	-0.0818631	0.0163398	0.0387181	0.0283778	-0.00162973	0.040231	20	20	15	36.9	36.9	27.3	57.41	0	60.461	1432700000	104
HARS2	Probable histidine--tRNA ligase, mitochondrial	P49590-2;P49590	P49590-2;P49590		0.357687	-0.656721	-0.435199	0.137632	0.107716	-0.0680925	-0.0697806	0.113821	0.285448	0.382055	0.77131	-0.640651	-0.104717	-0.580841	-0.992059	0.600299	0.199027	0.0557227	-0.31037	0.791342	7	2	2	15.2	5	5	54.114	0	4.5661	13541000	4
HAT1	Histone acetyltransferase type B catalytic subunit	O14929;O14929-2	O14929;O14929-2		0.066968	0.062225	0.0457226	-0.025822	-0.0292135	0.00252576	-0.00519696	-0.0342709	-0.0435734	-0.0387384	-0.0091235	-0.0203542	0.0400205	-0.0769829	0.0651523	-0.0156485	0.0085856	-0.0145311	-0.0593338	0.02522	10	10	9	32	32	30.1	49.512	0	34.216	556670000	42
HAUS1	HAUS augmin-like complex subunit 1	Q96CS2-2;Q96CS2	Q96CS2-2;Q96CS2		-0.0783885	-0.163276	0.00575256	-0.0898389	-0.00699701	0.00355067	-0.0186005	0.180871	0.0196588	0.0761981	0.0321118	0.0101943	0.121209	0.024545	0.00298172	0.0263317	-0.0127904	-0.00642418	-0.0965706	-0.0868878	2	2	2	11.9	11.9	11.9	22.744	0.0027248	2.2427	89285000	6
HAUS6	HAUS augmin-like complex subunit 6	Q7Z4H7-3;Q7Z4H7;Q7Z4H7-2	Q7Z4H7-3;Q7Z4H7;Q7Z4H7-2		0.0490367	-0.125028	-0.0754713	-0.021128	0.068473	-0.00987516	-0.213527	-0.575427	0.0874479	0.0588079	-0.253172	0.114689	-0.038265	0.170143	-0.0495413	0.580659	-0.0462586	-0.237196	0.388246	0.0710174	4	4	3	4.6	4.6	3.5	104.31	0	5.0664	19528000	4
HAUS7	HAUS augmin-like complex subunit 7	Q99871-3;Q99871;Q99871-2	Q99871-3;Q99871;Q99871-2		-0.0219096	-0.0930855	-0.539784	-0.667106	-0.00165511	-0.0812344	-0.0914458	-0.586564	0.0196162	0.15807	-0.195013	0.643523	0.0466543	-0.102889	0.183322	-0.0442496	0.213607	-0.159887	0.33306	0.930603	2	2	2	6.8	6.8	6.8	37.524	0.0037096	2.0149	39098000	2
HAX1	HCLS1-associated protein X-1	O00165-5;O00165;O00165-2;O00165-3;O00165-4;O00165-6	O00165-5;O00165;O00165-2;O00165-3		-0.0806597	-0.158508	0.00877246	-0.11228	0.251827	-0.206033	-0.0645613	0.232114	0.0912097	-0.0119896	-0.35421	0.244547	0.155172	-0.26427	0.119338	-0.0513636	0.000225872	0.200312	-0.00728989	-0.0487221	3	3	3	10.8	10.8	10.8	26.099	0	4.253	59470000	3
HBS1L	HBS1-like protein	Q9Y450-4;Q9Y450;Q9Y450-2	Q9Y450-4;Q9Y450		0.0367265	-0.0441998	-0.0988981	-0.0573903	-0.0555755	0.267033	0.0914095	0.210407	-0.0641656	-1.97403e-05	-0.00891161	0.0806678	-0.0760784	0.125773	-0.114537	0.0416218	-0.189525	-0.0226826	-0.0204704	-0.157553	8	8	8	15.9	15.9	15.9	70.624	0	22.923	135590000	21
HCCS	Cytochrome c-type heme lyase	P53701	P53701		-0.0437149	-0.0553424	0.0197206	-0.0289673	-0.0389481	-0.125908	-0.0662713	0.0366833	0.00162566	0.0142406	0.0625879	-0.0628224	0.0462323	0.147897	0.0416184	-0.00384112	-0.0695846	0.100788	-0.0426217	0.0102587	5	5	5	19.4	19.4	19.4	30.601	0	15.075	162180000	12
HCFC1	Host cell factor 1;HCF N-terminal chain 1;HCF N-terminal chain 2;HCF N-terminal chain 3;HCF N-terminal chain 4;HCF N-terminal chain 5;HCF N-terminal chain 6;HCF C-terminal chain 1;HCF C-terminal chain 2;HCF C-terminal chain 3;HCF C-terminal chain 4;HCF C-terminal chain 5;HCF C-terminal chain 6	P51610;P51610-2;P51610-4;P51610-3;Q9Y5Z7	P51610;P51610-2;P51610-4		-0.0163901	0.0359902	-0.0232425	-0.0201305	-0.0477218	-0.027027	0.0303903	-0.0448721	-0.0929406	0.0228171	-0.0109347	0.07973	-0.00924091	0.0552438	-0.0130062	-0.00891466	-0.00241914	0.058974	0.0120629	-0.0347376	26	26	25	17.2	17.2	16.4	208.73	0	76.637	821740000	73
HDAC1	Histone deacetylase 1	Q13547	Q13547		0.0449284	-0.0788808	-0.0359239	-0.187758	0.0544159	-0.0838211	0.0568124	-0.141854	-0.0249379	-0.0353559	-0.0538742	0.0712496	-0.00196238	0.111881	0.117696	0.044341	-0.0124822	0.0035008	0.0698161	0.0258394	6	3	3	14.7	7.1	7.1	55.102	0	9.8066	186610000	7
HDAC2	Histone deacetylase 2	Q92769;Q92769-3	Q92769;Q92769-3		-0.0108064	-0.020272	-0.0981709	-0.140944	-0.0203743	-0.108357	0.0388931	0.0895091	0.0452496	0.0106501	-0.108012	0.220719	-0.0408982	0.00171393	0.162536	-0.0544117	0.0734713	0.046909	-0.0314495	-0.112324	11	11	8	24.4	24.4	16.8	55.364	0	24.466	692840000	46
HDAC7	Histone deacetylase 7	Q8WUI4-3;Q8WUI4-4;Q8WUI4;Q8WUI4-7;Q8WUI4-6;Q8WUI4-5;Q8WUI4-8;Q8WUI4-10	Q8WUI4-3;Q8WUI4-4;Q8WUI4;Q8WUI4-7;Q8WUI4-6;Q8WUI4-5;Q8WUI4-8;Q8WUI4-10		-0.256261	-0.308793	0.21011	0.078826	-0.0258849	-0.0397398	-0.0822955	0.352201	-0.105958	0.249486	-0.625192	0.0111193	-0.0268442	0.717605	0.732064	-0.453898	-0.0484495	-0.177875	0.0196727	-0.276262	2	2	2	2	2	2	99.091	0.0011514	2.7505	18278000	2
HDDC2	HD domain-containing protein 2	Q7Z4H3-2;Q7Z4H3;Q7Z4H3-3	Q7Z4H3-2;Q7Z4H3		-0.0940472	0.257553	-0.0471865	0.0913062	-0.0831168	0.0160511	0.07766	0.270678	-0.140395	0.115252	-0.0125455	-0.0709783	-0.0251228	0.0577982	-0.212433	-0.00256615	-0.0780545	-0.0486323	-0.0490601	-0.0785294	5	5	5	38.8	38.8	38.8	19.55	0	15.742	218170000	38
HDDC3	Guanosine-3,5-bis(diphosphate) 3-pyrophosphohydrolase MESH1	Q8N4P3;Q8N4P3-2	Q8N4P3		-0.0810589	-0.216647	0.13762	0.0885138	0.30058	0.168971	0.163369	0.0514936	-0.0750966	0.0790084	-0.0769091	-0.0902168	0.13143	-0.411022	0.141855	-0.106082	0.0894491	-0.00832791	-0.259425	-0.0838749	5	5	4	33.5	33.5	24.6	20.329	0	5.0169	196570000	10
HDGF	Hepatoma-derived growth factor	P51858;P51858-2;P51858-3	P51858;P51858-2;P51858-3		-0.380617	0.610414	-0.237037	-0.106103	-0.0717859	0.0080214	0.141848	0.431731	-0.467116	0.103913	-0.340812	0.532581	0.110591	0.509853	0.357142	-0.156365	-0.391674	-0.054314	-0.253417	-0.403224	17	16	16	75.8	72.5	72.5	26.788	0	264.1	5980200000	178
HDGFRP2	Hepatoma-derived growth factor-related protein 2	Q7Z4V5-2;Q7Z4V5;Q7Z4V5-4;Q7Z4V5-3	Q7Z4V5-2;Q7Z4V5;Q7Z4V5-4;Q7Z4V5-3		-0.357147	0.347522	-0.339781	-0.313206	-0.104248	-0.0357241	0.106884	0.515657	-0.427586	0.223452	-0.309134	0.488576	0.139126	0.369852	0.358949	-0.105174	-0.185671	0.0077106	-0.0678648	-0.368562	18	17	17	27.2	26	26	74.229	0	101.91	2381000000	79
HDHD1	Pseudouridine-5-phosphatase	Q08623-3;Q08623;Q08623-4;Q08623-2	Q08623-3;Q08623;Q08623-4;Q08623-2		-0.0122644	0.258443	-0.0692243	-0.227072	0.0179131	-0.0397966	0.224512	0.100865	0.0208623	-0.194526	-0.169804	0.129704	-0.167747	-0.583802	-0.0597995	-0.118696	0.48028	0.197923	0.0693383	0.0865208	2	2	2	10.6	10.6	10.6	23.283	0.00087007	2.8423	24312000	3
HDHD2	Haloacid dehalogenase-like hydrolase domain-containing protein 2	Q9H0R4;Q9H0R4-2	Q9H0R4;Q9H0R4-2		0.0287582	-0.0412905	-0.0744203	0.189916	0.0997701	-0.129059	-0.153426	0.238159	-0.0609177	-0.103245	0.0592188	-0.497731	-0.105719	0.0430714	-0.333633	0.184834	0.0414675	0.20445	0.24823	0.105198	2	2	2	5.8	5.8	5.8	28.536	0.0026846	2.114	52614000	5
HDLBP	Vigilin	Q00341;Q00341-2	Q00341;Q00341-2		0.000252396	0.0270913	0.0236427	0.0257962	0.000725739	-0.0068254	0.0277988	0.00259107	-0.00538099	-0.00206718	-0.0345183	-0.00076133	-0.00105753	-0.00694543	0.0295999	-0.00440407	-0.0319822	0.00347485	-0.027203	-0.0761969	31	31	31	28	28	28	141.45	0	116.3	1763100000	110
HEATR1	HEAT repeat-containing protein 1;HEAT repeat-containing protein 1, N-terminally processed	Q9H583	Q9H583		0.029675	0.050009	0.10792	-0.289722	-0.0915681	0.0814504	-0.145745	-0.114519	-0.000741482	0.0508645	0.104231	-0.171254	-0.0190678	-0.033739	-0.17369	0.510519	-0.0474194	-0.0421776	0.292121	-0.153515	6	6	6	2.9	2.9	2.9	242.37	0	8.9003	52851000	8
HEATR3	HEAT repeat-containing protein 3	Q7Z4Q2;Q7Z4Q2-2	Q7Z4Q2		-0.104629	-0.0162837	-0.0681541	-0.119145	-0.00315572	-0.050683	0.0474789	0.17209	-0.0489744	-0.00931129	-0.00319099	0.22124	0.0457116	0.181294	-0.07854	-0.169286	0.0558122	-0.0724948	0.0613095	-0.0974571	5	5	5	7.9	7.9	7.9	74.582	0	8.7723	127580000	10
HEATR6	HEAT repeat-containing protein 6	Q6AI08	Q6AI08		0.0830587	-0.441949	-1.16101	-0.212004	-0.0296385	0.218348	-0.158982	0.551291	0.29818	0.0440657	0.229584	0.237947	-0.13356	-0.100173	-0.0613086	0.214267	0.269156	-0.230202	-0.000312708	0.326871	2	2	2	2.4	2.4	2.4	128.78	0	17.817	52570000	5
HEBP1	Heme-binding protein 1	Q9NRV9	Q9NRV9		0.0629139	0.0141179	0.0678156	0.0503615	-0.0234734	0.0634141	0.0393436	-0.0230069	-0.019639	0.0405453	0.0287566	-0.0794074	-0.052608	-0.0447783	-0.064572	0.0216042	-0.0260166	-0.0371904	0.0347635	-0.109314	6	6	6	38.1	38.1	38.1	21.097	0	18.656	327210000	23
HEBP2	Heme-binding protein 2	Q9Y5Z4;Q9Y5Z4-2	Q9Y5Z4;Q9Y5Z4-2		-0.108938	0.325467	-0.0602746	-0.0077671	-0.040761	0.019662	0.0663953	0.245219	-0.228892	0.0118641	-0.211371	0.173409	0.0364848	0.241368	0.140479	0.0356715	-0.24819	-0.0307811	-0.217873	-0.197544	8	8	8	41	41	41	22.875	0	27.049	1251700000	91
HECTD1	E3 ubiquitin-protein ligase HECTD1	Q9ULT8	Q9ULT8		0.00167754	-0.0416759	0.0010497	-0.100775	-0.00217877	-0.0452238	-0.0454124	-0.0359913	0.0123215	-0.00428886	-0.00612503	0.0677025	0.0121865	0.0427433	0.068703	0.00526381	0.0128256	-0.0111017	0.0574151	-0.0454853	20	20	20	9.3	9.3	9.3	289.38	0	71.45	664260000	48
HELLS	Lymphoid-specific helicase	Q9NRZ9-4;Q9NRZ9-2;Q9NRZ9;Q9NRZ9-6;Q9NRZ9-5;Q9NRZ9-3;Q9NRZ9-8;Q9NRZ9-7	Q9NRZ9-4;Q9NRZ9-2;Q9NRZ9;Q9NRZ9-6;Q9NRZ9-5;Q9NRZ9-3		0.265022	-0.0890326	-0.0330667	-0.374924	0.117699	0.0840591	-0.283643	0.0776241	-0.0461503	-0.0177424	0.710484	-0.647185	-0.0263945	-0.395448	-1.06165	0.666248	0.0384231	0.0468502	0.210274	0.702182	5	5	5	7.4	7.4	7.4	90.765	0	10.817	45442000	8
HERC5	E3 ISG15--protein ligase HERC5	Q9UII4	Q9UII4		0.00502887	0.121586	0.105792	-0.942886	-0.127087	0.362439	0.457075	-0.574241	-0.0595225	-0.24074	0.30584	0.176615	0.144151	-0.220399	0.0144134	-0.02304	-0.0898316	0.0816614	-0.0121275	0.458904	3	3	3	3	3	3	116.85	0.001952	2.4302	31335000	3
HEXA	Beta-hexosaminidase subunit alpha	P06865;P06865-2	P06865		0.00947538	-0.0697753	0.0110939	0.0257968	-0.0163651	0.0359231	-0.0534174	-0.0257344	0.0228125	-0.0385443	0.0311561	-0.0298831	0.0309468	-0.0877741	-0.0628659	0.0362116	0.0823548	0.00823178	0.0236532	0.0103343	7	7	7	12.1	12.1	12.1	60.702	0	14.935	1750200000	35
HEXB	Beta-hexosaminidase subunit beta;Beta-hexosaminidase subunit beta chain B;Beta-hexosaminidase subunit beta chain A	P07686	P07686		0.0241161	-0.0486572	0.0182494	0.0725002	0.0493211	0.0112924	0.000309855	-0.139937	0.0883584	0.0157846	0.0290533	-0.118605	-0.0251656	-0.169203	0.00876474	-0.00582533	0.0199443	0.0114942	0.0142634	0.0875715	12	12	12	22.5	22.5	22.5	63.111	0	55.691	797740000	38
HEXIM1	Protein HEXIM1	O94992;Q96MH2	O94992		-0.0736428	0.169375	-0.127904	-0.0160464	0.0135768	-0.0335852	0.134392	0.327409	-0.176383	0.14773	-0.284293	0.32164	-0.0296808	0.23038	0.128828	-0.112354	-0.205643	-0.0648413	-0.215567	-0.189759	7	7	7	27.9	27.9	27.9	40.623	0	56.347	410810000	18
HGS	Hepatocyte growth factor-regulated tyrosine kinase substrate	O14964-2;O14964	O14964-2;O14964		0.0279687	0.0767574	0.00752001	0.0268234	-0.052768	0.000118017	-0.0687034	0.0614195	0.00262666	-0.0192603	0.109586	0.0845993	-0.0699646	0.0309437	-0.0589792	-0.135277	-0.0319043	0.0127681	-0.0750077	0.0143641	9	9	9	12.5	12.5	12.5	76.375	0	20.314	412710000	37
HIBADH	3-hydroxyisobutyrate dehydrogenase, mitochondrial	P31937	P31937		-0.0253482	-0.343682	-0.0761603	-0.305524	0.239506	-0.0730067	-0.881619	-0.37295	0.198848	0.22121	0.895049	-0.14498	0.124989	-0.203196	-0.0749181	-0.339212	0.0362522	-0.198286	0.839198	0.427461	2	2	2	8.6	8.6	8.6	35.329	0	4.7119	18342000	3
HIBCH	3-hydroxyisobutyryl-CoA hydrolase, mitochondrial	Q6NVY1;Q6NVY1-2	Q6NVY1;Q6NVY1-2		0.0465992	-0.0258899	0.0133514	0.0385285	0.0448629	-0.00712657	-0.0427437	-0.0559676	0.0146873	-0.0477318	0.0113294	-0.079022	-0.0295226	-0.126128	0.0363451	0.0190762	0.0484404	0.0590943	0.00325909	0.0221887	5	5	5	12.2	12.2	12.2	43.482	0	13.229	223940000	14
HIF1AN	Hypoxia-inducible factor 1-alpha inhibitor	Q9NWT6	Q9NWT6		0.01006	-0.0573556	-0.489874	-0.491608	-0.193838	0.161271	-0.476508	0.418881	-0.0882753	-0.258432	0.270673	-0.00858411	0.10819	0.376284	-0.540091	0.0801432	0.0649321	-0.14555	0.368533	0.83478	3	3	3	11.2	11.2	11.2	40.285	0	16.803	38144000	7
HINT1	Histidine triad nucleotide-binding protein 1	P49773	P49773		-0.0620452	0.257877	-0.0283216	0.00724678	0.0465806	0.128465	0.0823695	0.15808	-0.0974523	0.0645778	-0.106151	0.199556	0.0438112	-0.135679	0.0758956	-0.049191	-0.200954	-0.0678959	-0.177829	-0.195309	6	6	6	40.5	40.5	40.5	13.802	0	71.408	4591900000	82
HINT2	Histidine triad nucleotide-binding protein 2, mitochondrial	Q9BX68	Q9BX68		0.0498934	0.0953376	-0.237877	0.124848	-0.0284372	0.15866	0.106241	-0.176006	0.0336256	-0.0515739	-0.075076	0.202297	0.0250192	-0.169632	-0.0978603	0.0683558	-0.0641674	-0.0714397	-0.0355236	0.0869473	4	4	4	36.8	36.8	36.8	17.162	0	11.302	194250000	13
HIP1	Huntingtin-interacting protein 1	O00291-3;O00291-4;O00291	O00291-3;O00291-4;O00291		-0.0754807	-0.0987621	0.539564	0.486059	0.0438996	-0.0544337	0.412079	-0.570346	0.102902	0.0554433	0.0151204	-0.230476	0.0404541	-0.0257365	-0.303642	-0.965575	0.0951656	-0.106166	0.240381	0.34318	4	4	4	3.9	3.9	3.9	110.66	0.0011537	2.7658	37981000	4
HIP1R	Huntingtin-interacting protein 1-related protein	O75146;O75146-2	O75146		0.185701	-0.282836	-0.0666691	-0.221375	0.0104315	-0.0138423	0.195629	-0.549885	0.102963	0.232585	0.187574	0.238734	-0.148411	0.0154718	0.0230541	0.213682	0.0403075	-0.165085	-0.0791142	0.0247154	3	3	3	2.8	2.8	2.8	119.39	0.00030294	3.3053	28319000	4
HIRIP3	HIRA-interacting protein 3	Q9BW71;Q9BW71-2;Q9BW71-3	Q9BW71;Q9BW71-2		-0.310936	0.237712	-0.186906	0.0810587	-0.0950063	0.0385292	-0.00276652	0.02573	-0.273833	0.203732	-0.068454	0.186729	-0.0397913	0.435323	-0.0135806	0.00621881	-0.194992	-0.0234515	0.0966477	-0.158332	7	7	7	12.8	12.8	12.8	61.956	0	13.401	136300000	14
HIST1H1C	Histone H1.2	P16403;Q02539;P22492;P16401	P16403		-0.769369	1.36719	-0.346141	-0.269197	-0.304355	-0.512909	0.225112	0.211852	-0.733227	-0.020432	-0.4014	0.600192	0.014065	2.18454	0.687992	-0.02921	-0.7435	-0.504713	-0.20038	-0.512476	12	3	3	43.7	13.6	13.6	21.364	0	20.686	1733000000	19
HIST1H1D	Histone H1.3	P16402	P16402		-0.271591	0.24041	-0.271047	-0.294193	0.211838	-0.0433646	0.22505	0.195966	-0.245293	-0.0716579	-0.113871	0.23708	0.415897	0.501118	0.39733	0.0820812	-0.445289	-0.314783	-0.158268	-0.333782	10	2	2	34.8	10.4	10.4	22.35	0	10.605	201790000	7
HIST1H1E	Histone H1.4	P10412	P10412		-0.519392	0.237597	-0.425646	-0.254964	0.10154	-0.083271	0.287153	0.286717	-0.361843	-0.00689754	-0.253846	0.25688	0.329882	0.817852	0.519172	0.0741559	-0.371539	-0.166643	-0.186199	-0.337076	14	14	5	50.7	50.7	21.5	21.865	0	163.8	20963000000	229
HIST1H2AJ;HIST1H2AH;H2AFJ;HIST2H2AC;HIST2H2AA3;HIST1H2AG;HIST1H2AC;HIST1H2AD;HIST1H2AA;HIST2H2AB	Histone H2A type 1-J;Histone H2A type 1-H;Histone H2A.J;Histone H2A type 2-C;Histone H2A type 2-A;Histone H2A type 1;Histone H2A type 1-C;Histone H2A type 1-D;Histone H2A type 1-A;Histone H2A type 2-B	Q99878;Q96KK5;Q9BTM1;Q16777;Q6FI13;P0C0S8;Q9BTM1-2;Q93077;P20671;Q96QV6;Q8IUE6	Q99878;Q96KK5;Q9BTM1;Q16777;Q6FI13;P0C0S8;Q9BTM1-2;Q93077;P20671;Q96QV6;Q8IUE6		-1.80729	1.11847	0.17985	-0.197505	0.596731	-0.0991446	0.259907	-0.14837	-3.0223	0.714356	0.0539231	0.202218	0.550012	0.907858	0.0679744	-0.00729799	0.318833	0.699764	-0.203722	-0.240633	4	2	2	26.6	14.1	14.1	13.936	0.0049389	1.8621	291290000	2
HIST1H2BM;HIST1H2BN;HIST1H2BH;HIST2H2BF;HIST1H2BC;HIST1H2BD;HIST1H2BK;HIST1H2BL;H2BFS	Histone H2B type 1-M;Histone H2B type 1-N;Histone H2B type 1-H;Histone H2B type 2-F;Histone H2B type 1-C/E/F/G/I;Histone H2B type 1-D;Histone H2B type 1-K;Histone H2B type 1-L;Histone H2B type F-S	Q99879;Q99877;Q93079;Q5QNW6;P62807;P58876;O60814;Q5QNW6-2;Q99880;P57053;Q96A08	Q99879;Q99877;Q93079;Q5QNW6;P62807;P58876;O60814;Q5QNW6-2;Q99880;P57053		0.183384	0.0958149	0.013695	0.21072	0.124402	-0.132983	0.0400241	-0.135365	0.347879	-0.108928	0.195173	0.157328	-0.0822668	-0.244633	-0.0718347	-0.178975	0.0126173	-0.218001	-0.0383809	-0.226041	9	9	2	58.7	58.7	7.9	13.989	0	40.492	3499600000	96
HIST1H4A	Histone H4	P62805	P62805		0.209218	0.0580384	0.102819	0.241195	0.124603	-0.159287	0.0554917	-0.277372	0.506275	-0.124894	0.380563	0.158176	-0.199093	-0.228857	-0.195959	-0.258709	0.055287	-0.264004	-0.00355367	-0.236305	8	8	8	58.3	58.3	58.3	11.367	0	64.628	3188900000	60
HIST2H2BE;HIST1H2BB;HIST1H2BO;HIST1H2BJ	Histone H2B type 2-E;Histone H2B type 1-B;Histone H2B type 1-O;Histone H2B type 1-J	Q16778;P33778;P23527;P06899;Q6DRA6;Q6DN03	Q16778;P33778;P23527;P06899		0.146532	0.0301389	0.0990445	0.0475271	0.0518968	-0.0163128	0.00349396	-0.200458	0.269701	-0.11248	0.329526	0.23534	-0.108037	-0.285242	-0.114875	-0.196168	0.104273	-0.103184	-0.0643329	-0.172753	9	2	0	58.7	7.9	0	13.92	0	9.3497	124280000	16
HK1	Hexokinase-1	P19367-4;P19367-2;P19367;P19367-3	P19367-4;P19367-2;P19367;P19367-3		0.0261693	0.00187033	0.0143133	0.0295112	-0.00994406	0.12143	0.000786394	-0.0440995	-0.0176625	-0.0421102	-0.0324056	-0.00991336	-0.0554228	-0.00220293	-0.0320175	0.0465502	-0.00892624	-0.0359158	0.0147715	-0.0211514	28	28	28	30.7	30.7	30.7	101.08	0	74.051	1568000000	88
HLA-A	HLA class I histocompatibility antigen, A-2 alpha chain;HLA class I histocompatibility antigen, A-31 alpha chain	P01892;P16189;P30456	P01892;P16189		0.0513069	-0.0996458	0.0257733	-0.0489679	-0.0257888	-0.00988908	0.00169495	-0.0510454	0.0241691	-0.0253488	0.212939	-0.386162	-0.0122065	0.0671431	-0.263053	0.0522758	-0.0174372	0.0249826	0.242182	0.180708	12	5	0	35.9	15.9	0	40.921	0	18.544	169440000	32
HLA-A	HLA class I histocompatibility antigen, A-3 alpha chain;HLA class I histocompatibility antigen, A-11 alpha chain;HLA class I histocompatibility antigen, A-36 alpha chain;HLA class I histocompatibility antigen, A-1 alpha chain	P04439;P13746;P13746-2;P30455;P30443;Q09160;P01893	P04439;P13746;P13746-2;P30455;P30443		0.0758997	-0.0953299	0.0563297	-0.0297059	-0.042572	-0.00713725	-0.0700912	-0.107101	0.0473343	-0.0462433	0.0815913	-0.0927387	0.0228568	-0.0380047	-0.0248207	0.0802515	-0.0141847	0.0746666	0.00550594	0.0671239	13	13	2	46.6	46.6	6.6	40.84	0	110.7	954430000	60
HLA-B	HLA class I histocompatibility antigen, B-7 alpha chain;HLA class I histocompatibility antigen, B-81 alpha chain;HLA class I histocompatibility antigen, B-48 alpha chain	P01889;Q31610;P30486;P17693-6;P17693-2;P17693-5;P17693;P13747	P01889;Q31610;P30486		0.177847	-0.261096	0.22347	0.0603642	-0.0795501	0.0275943	0.110166	0.217867	0.175873	-0.10123	0.183942	-0.232834	0.0998314	-0.563959	-0.369981	-0.170675	0.384643	0.117332	-0.111027	0.0550536	8	3	0	28.7	14.9	0	40.46	0	24.686	97930000	8
HLA-C	HLA class I histocompatibility antigen, Cw-7 alpha chain	P10321	P10321		0.0757838	-0.145153	0.00426635	0.118934	0.0198311	-0.0440298	-0.0571713	0.0115045	0.0256615	0.0305737	-0.0101163	-0.0120076	0.000142574	-0.0221714	-0.0466316	-0.0128943	0.00833097	0.0283165	-0.030508	0.000969052	10	5	1	38.5	22.1	6.6	40.648	0	28.954	410630000	28
HM13	Minor histocompatibility antigen H13	Q8TCT9-5;Q8TCT9;Q8TCT9-4;Q8TCT9-2	Q8TCT9-5;Q8TCT9;Q8TCT9-4;Q8TCT9-2		0.0535206	0.00206763	-0.0989946	0.0383479	0.01315	0.0579003	-0.0261683	-0.0851056	0.0385574	-0.0861252	0.155315	-0.0265397	-0.0444003	-0.048153	-0.123332	-0.00262795	-0.0441827	0.0349507	-0.0202227	0.155673	4	4	4	15.8	15.8	15.8	36.813	0	6.2909	166900000	12
HMBS	Porphobilinogen deaminase	P08397-3;P08397;P08397-4;P08397-2	P08397-3;P08397;P08397-4;P08397-2		-0.0981267	0.508148	-0.00470601	-0.0300555	-0.0321398	0.299776	0.0997061	-0.0927876	0.0274149	-0.272709	-0.0177335	-0.111403	-0.139059	-0.145406	0.0599461	0.040991	-0.126709	-0.0439046	-0.0167868	0.039174	6	6	6	19.9	19.9	19.9	34.894	0	14.175	202810000	11
HMGA1	High mobility group protein HMG-I/HMG-Y	P17096;P17096-2;P17096-3	P17096;P17096-2;P17096-3		-0.623199	0.670582	-0.5079	-0.0674355	-0.0378366	-0.257123	0.261123	0.47064	-0.741426	0.133332	-0.545495	0.388074	0.0827641	1.00738	0.419837	0.0272182	-0.363637	0.106447	-0.0353785	-0.444339	7	7	7	58.9	58.9	58.9	11.676	0	40.723	905160000	33
HMGA2	High mobility group protein HMGI-C	P52926;P52926-3;P52926-6;P52926-4;P52926-5;P52926-2	P52926;P52926-3;P52926-6;P52926-4;P52926-5;P52926-2		-0.392037	0.347068	0.386434	0.531492	-0.0951908	-0.300765	0.0195185	-0.228991	-0.203535	0.116642	-0.318762	-0.48567	0.249228	0.710237	-1.87645	0.516527	-0.150129	-0.304233	0.482513	0.939733	4	4	4	58.7	58.7	58.7	11.832	0	24.877	114780000	9
HMGB1;HMGB1P1	High mobility group protein B1;Putative high mobility group protein B1-like 1	P09429;B2RPK0;P23497	P09429;B2RPK0		-0.34252	0.511435	-0.153953	-0.171283	-0.058462	-0.0345628	0.155553	0.269417	-0.430867	0.0983787	-0.294069	0.335363	0.0687144	0.549334	0.270432	-0.117362	-0.329325	-0.0548393	-0.145221	-0.182532	14	12	12	53	43.3	43.3	24.893	0	123.03	11596000000	181
HMGB2	High mobility group protein B2	P26583	P26583		-0.441868	0.649268	-0.256159	-0.160047	-0.102779	-0.203388	0.169426	0.325605	-0.537624	0.0813442	-0.366337	0.328585	0.0572265	0.790753	0.308307	-0.069604	-0.355279	0.0396317	-0.136491	-0.17694	15	15	13	51.2	51.2	41.1	24.033	0	87.299	12593000000	160
HMGB3	High mobility group protein B3	O15347	O15347		-0.303497	0.483985	-0.135081	-0.162551	-0.0827002	-0.0562337	0.112393	0.219874	-0.37559	0.0837059	-0.249612	0.259098	-0.00218897	0.586963	0.2083	-0.0148545	-0.328863	-0.0282943	-0.184981	-0.0862411	11	11	11	40	40	40	22.98	0	78.353	3042900000	85
HMGCS1	Hydroxymethylglutaryl-CoA synthase, cytoplasmic	Q01581;P54868-3;P54868-2;P54868	Q01581		0.0543388	-0.0532827	0.0148799	0.0320271	0.0296066	-0.00544086	0.0259482	-0.0841709	0.0243181	-0.00459652	0.00403064	-0.0644405	-0.0191089	-0.0875121	-0.0218503	0.0357223	0.00638011	0.0325827	0.0260459	-0.00184703	21	21	21	43.7	43.7	43.7	57.293	0	100.67	1984400000	155
HMGN1	Non-histone chromosomal protein HMG-14	P05114	P05114		-0.537537	0.464259	-0.338585	-0.251446	-0.0166769	-0.306961	0.180301	0.366684	-0.391289	0.0579533	-0.160897	0.403978	0.0651523	0.818499	0.27471	-0.149379	-0.301856	0.125742	-0.0322894	-0.326731	2	2	2	29	29	29	10.659	0	22.032	372940000	16
HMGN2	Non-histone chromosomal protein HMG-17	P05204;Q15651-2;O00479	P05204		-0.308525	0.19231	-0.239643	-0.500295	-0.0875129	-0.391632	0.203771	0.363627	-0.234268	0.101328	-0.1007	0.420766	0.11982	0.857816	0.460892	-0.100904	-0.317522	0.0454719	-0.186505	-0.354664	6	6	5	46.7	46.7	36.7	9.3926	0	78.381	1421600000	25
[truncated: 1,975 more rows]
